# Supplementary material for: Novel antibiotic resistance genes from the hospital effluent are disseminated into the marine environment in Norway
Source: bioRxiv or medRxiv preprint supplement (doi:10.1101/2024.09.23.24313887), 2024-09-24
Supplement: Supplementary file [file media-1.pdf]

**Supplementary Table S4:**Detected antibiotic resistance genes (ARG)

| <b>Sample</b>  | <b>ARGs</b>                           |
|----------------|---------------------------------------|
| Hospital-eff-F | <i>msr(E)</i>                         |
| Hospital-eff-F | <i>mph(E)</i>                         |
| Hospital-eff-F | <i>blaOXA-164</i>                     |
| Hospital-eff-F | <i>AAC(6')-IIa</i>                    |
| Hospital-eff-F | <i>tet(39)</i>                        |
| Hospital-eff-F | <i>blaOXA-141</i>                     |
| Hospital-eff-F | <i>blaMCA</i>                         |
| Hospital-eff-F | <i>tet(Q)</i>                         |
| Hospital-eff-F | <i>erm(B)</i>                         |
| Hospital-eff-F | <i>aph(3'')-Ib</i>                    |
| Hospital-eff-F | <i>aph(6)-Id</i>                      |
| Hospital-eff-F | <i>aac3-Ile</i>                       |
| Hospital-eff-F | <i>tet(W)</i>                         |
| Hospital-eff-F | <i>aac(3)-I</i>                       |
| Hospital-eff-F | <i>sul1</i>                           |
| Hospital-eff-F | <i>aadA27</i>                         |
| Hospital-eff-F | <i>blaOXA-139</i>                     |
| Hospital-eff-F | <i>erm(F)</i>                         |
| Hospital-eff-F | <i>tet(C)</i>                         |
| Hospital-eff-F | <i>aacA38</i>                         |
| Hospital-eff-F | <i>tet(O)</i>                         |
| Hospital-eff-F | <i>blaOXA-10</i>                      |
| Hospital-eff-F | <i>aac3-Ib</i>                        |
| Hospital-eff-F | <i>qacH</i>                           |
| Hospital-eff-F | <i>sul2</i>                           |
| Hospital-eff-F | <i>aacA-ACI1</i>                      |
| Hospital-eff-F | <i>ere(B)</i>                         |
| Hospital-eff-F | <i>aac6-Aph2</i>                      |
| Hospital-eff-F | <i>blaOXA-280</i>                     |
| Hospital-eff-F | <i>blaOXA-211</i>                     |
| Hospital-eff-F | <i>blaOXA-333</i>                     |
| Hospital-eff-F | <i>blaPSE-4</i>                       |
| Hospital-eff-F | <i>AAC(6')-Ib7</i>                    |
| Hospital-eff-F | <i>ant(3'')-IIa</i>                   |
| Hospital-eff-F | <i>aac3-IId</i>                       |
| Hospital-eff-F | <i>AAC(6')-30/AAC(6')-Ib'_fusion_</i> |
| Hospital-eff-F | <i>blaOXA-2</i>                       |
| Hospital-eff-F | <i>cfxA6</i>                          |
| Hospital-eff-F | <i>cfxA</i>                           |
| Hospital-eff-F | <i>blaOXA-296</i>                     |
| Hospital-eff-F | <i>blaOXA-160</i>                     |

|                |                                      |
|----------------|--------------------------------------|
| Hospital-eff-F | <i>aadS</i>                          |
| Hospital-eff-F | <i>tet(X)</i>                        |
| Hospital-eff-F | <i>blaOXA-281</i>                    |
| Hospital-eff-F | <i>ant(2'')-Ia</i>                   |
| Hospital-eff-F | <i>mef(A)</i>                        |
| Hospital-eff-F | <i>tet(A)</i>                        |
| Hospital-eff-F | <i>aadA1</i>                         |
| Hospital-eff-F | <i>tet(M)</i>                        |
| Hospital-eff-F | <i>aph(2'')-IIa</i>                  |
| Hospital-eff-F | <i>tet(R)</i>                        |
| Hospital-eff-F | <i>aac(6')-Ib-G</i>                  |
| Hospital-eff-F | <i>Mef(En2)</i>                      |
| Hospital-eff-F | <i>Inu(AN2)</i>                      |
| Hospital-eff-F | <i>aac3-Ib-Aac6-Ib</i>               |
| Hospital-eff-F | <i>blaOXA-18</i>                     |
| Hospital-eff-F | <i>aadE</i>                          |
| Hospital-eff-F | <i>aac(3)-Ile</i>                    |
| Hospital-eff-F | <i>mef(C)</i>                        |
| Hospital-eff-F | <i>Bifidobacterium_adolescentis_</i> |
| Hospital-eff-F | <i>aadA5</i>                         |
| Hospital-eff-F | <i>msr(D)</i>                        |
| Hospital-eff-F | <i>aac3-I</i>                        |
| Hospital-eff-F | <i>blaOXA-347</i>                    |
| Hospital-eff-F | <i>vanZ-A</i>                        |
| Hospital-eff-F | <i>aac(6')-Im</i>                    |
| Hospital-eff-F | <i>mph(G)</i>                        |
| Hospital-eff-F | <i>blaOXA-15</i>                     |
| Hospital-eff-F | <i>strB</i>                          |
| Hospital-eff-F | <i>dfrF</i>                          |
| Hospital-eff-F | <i>tet(40)</i>                       |
| Hospital-eff-F | <i>vanA-G</i>                        |
| Hospital-eff-F | <i>vanY-A</i>                        |
| Hospital-eff-F | <i>ere(D)</i>                        |
| Hospital-eff-F | <i>erm(G)</i>                        |
| Hospital-eff-F | <i>TEM-1</i>                         |
| Hospital-eff-F | <i>tet(32)</i>                       |
| Hospital-eff-F | <i>ant(3'')-IIc</i>                  |
| Hospital-eff-F | <i>CblA-1</i>                        |
| Hospital-eff-F | <i>aadA2</i>                         |
| Hospital-eff-F | <i>blaOXA-9</i>                      |
| Hospital-eff-F | <i>aac(3)-Ia</i>                     |
| Hospital-eff-F | <i>aph(3')-VIa</i>                   |
| Hospital-eff-F | <i>aadA11</i>                        |
| Hospital-eff-F | <i>catB3</i>                         |

|                |                                       |
|----------------|---------------------------------------|
| Hospital-eff-F | <i>catA13</i>                         |
| Hospital-eff-F | <i>aadA6</i>                          |
| Hospital-eff-F | <i>aacA-ACI6</i>                      |
| Hospital-eff-F | <i>blaOXA-212</i>                     |
| Hospital-eff-F | <i>blaOXA-1</i>                       |
| Hospital-eff-F | <i>tet(G)</i>                         |
| Hospital-eff-F | <i>catS</i>                           |
| Hospital-eff-F | <i>aac3-IIa</i>                       |
| Hospital-eff-F | <i>aac6-Ig</i>                        |
| Hospital-eff-F | <i>blaOXA-652</i>                     |
| Hospital-eff-F | <i>blaOXA-650</i>                     |
| Hospital-eff-F | <i>vanY-B</i>                         |
| Hospital-eff-F | <i>vanH-B</i>                         |
| Hospital-eff-F | <i>blaOXA-643</i>                     |
| Hospital-eff-F | <i>blaOXA-662</i>                     |
| Hospital-eff-F | <i>CARB-3</i>                         |
| Hospital-eff-F | <i>blaOXA-209</i>                     |
| Hospital-eff-F | <i>aac3-IIc</i>                       |
| Hospital-eff-F | <i>tetR(G)</i>                        |
| Hospital-eff-F | <i>mph(A)</i>                         |
| Hospital-eff-F | <i>blaOXA-373</i>                     |
| Hospital-eff-F | <i>aph(3'')-III</i>                   |
| Hospital-eff-F | <i>Klebsiella_pneumoniae_KpnG</i>     |
| Hospital-eff-F | <i>floR</i>                           |
| Hospital-eff-F | <i>aph3-VIb</i>                       |
| Hospital-eff-F | <i>aph(3'')-Ia</i>                    |
| Hospital-eff-F | <i>vanS-B</i>                         |
| Hospital-eff-F | <i>vanX-B</i>                         |
| Hospital-eff-F | <i>Bifidobacteria_intrinsic_ileS_</i> |
| Hospital-eff-F | <i>aadA24</i>                         |
| Hospital-eff-F | <i>aac(6')-30</i>                     |
| Hospital-eff-F | <i>vanH-A</i>                         |
| Hospital-eff-F | <i>bacA</i>                           |
| Hospital-eff-F | <i>CRP</i>                            |
| Hospital-eff-F | <i>ampH</i>                           |
| Hospital-eff-F | <i>tolC</i>                           |
| Hospital-eff-F | <i>cpxA</i>                           |
| Hospital-eff-F | <i>blaOXA-427</i>                     |
| Hospital-eff-F | <i>vanR-A</i>                         |
| Hospital-eff-F | <i>mdtP</i>                           |
| Hospital-eff-F | <i>blaAER-1</i>                       |
| Hospital-eff-F | <i>mdtE</i>                           |
| Hospital-eff-F | <i>vanX-A</i>                         |
| Hospital-eff-F | <i>Inu(C)</i>                         |

|                |                                       |
|----------------|---------------------------------------|
| Hospital-eff-F | <i>Klebsiella_pneumoniae_acrA</i>     |
| Hospital-eff-F | <i>mdtF</i>                           |
| Hospital-eff-F | <i>vanA-A</i>                         |
| Hospital-eff-F | <i>acrB</i>                           |
| Hospital-eff-F | <i>cfxA_gen</i>                       |
| Hospital-eff-F | <i>aadB</i>                           |
| Hospital-eff-F | <i>H-NS</i>                           |
| Hospital-eff-F | <i>blaOXA-334</i>                     |
| Hospital-eff-F | <i>gadX</i>                           |
| Hospital-eff-F | <i>cmxA</i>                           |
| Hospital-eff-F | <i>blaMOX-9</i>                       |
| Hospital-eff-F | <i>vanW-B</i>                         |
| Hospital-eff-F | <i>baeR</i>                           |
| Hospital-eff-F | <i>blaOXA-101</i>                     |
| Hospital-eff-F | <i>gadW</i>                           |
| Hospital-eff-F | <i>kdpE</i>                           |
| Hospital-eff-F | <i>vanB</i>                           |
| Hospital-eff-F | <i>blaPER-1</i>                       |
| Hospital-eff-F | <i>dfrA14</i>                         |
| Hospital-eff-F | <i>vanS-A</i>                         |
| Hospital-eff-F | <i>CARB-2</i>                         |
| Hospital-eff-F | <i>qnrS2</i>                          |
| Hospital-eff-F | <i>blaOXA-24</i>                      |
| Hospital-eff-F | <i>floR2</i>                          |
| Hospital-eff-F | <i>Penicillin_Binding_Protein_Eco</i> |
| Hospital-eff-F | <i>mdtN</i>                           |
| Hospital-eff-F | <i>aph7</i>                           |
| Hospital-eff-F | <i>vanR-B</i>                         |
| Hospital-eff-F | <i>cfr(C)</i>                         |
| Hospital-eff-F | <i>acrF</i>                           |
| Hospital-eff-F | <i>aadA17</i>                         |
| Hospital-eff-F | <i>AAC(6')-Ib8</i>                    |
| Hospital-eff-F | <i>mdtO</i>                           |
| Hospital-eff-F | <i>aph(3')-VI</i>                     |
| Hospital-eff-F | <i>mdtB</i>                           |
| Hospital-eff-F | <i>blaBES-1</i>                       |
| Hospital-eff-F | <i>ampH_Ecoli</i>                     |
| Hospital-eff-F | <i>blaOXA-205</i>                     |
| Hospital-eff-F | <i>evgS</i>                           |
| Hospital-eff-F | <i>aad9</i>                           |
| Hospital-eff-F | <i>marA</i>                           |
| Hospital-eff-F | <i>Klebsiella_pneumoniae_OmpK</i>     |
| Hospital-eff-F | <i>eptA</i>                           |
| Hospital-eff-F | <i>tet(44)</i>                        |

|                |                                   |
|----------------|-----------------------------------|
| Hospital-eff-F | <i>mdtC</i>                       |
| Hospital-eff-F | <i>Escherichia_coli_emrE</i>      |
| Hospital-eff-F | <i>OqxA</i>                       |
| Hospital-eff-F | <i>blaOXA-836</i>                 |
| Hospital-eff-F | <i>emrK</i>                       |
| Hospital-eff-F | <i>Escherichia_coli_acrA</i>      |
| Hospital-eff-F | <i>evgA</i>                       |
| Hospital-eff-F | <i>blaOXA-645</i>                 |
| Hospital-eff-F | <i>acrS</i>                       |
| Hospital-eff-F | <i>emrY</i>                       |
| Hospital-eff-F | <i>acrD</i>                       |
| Hospital-eff-F | <i>fosA_gen</i>                   |
| Hospital-eff-F | <i>aac(3)-IVa</i>                 |
| Hospital-eff-F | <i>Escherichia_coli_mdfA</i>      |
| Hospital-eff-F | <i>dfrB1</i>                      |
| Hospital-eff-F | <i>mdtG</i>                       |
| Hospital-eff-F | <i>pmrF</i>                       |
| Hospital-eff-F | <i>acrE</i>                       |
| Hospital-eff-F | <i>yojI</i>                       |
| Hospital-eff-F | <i>nimj_Nitroimidazole_Gene</i>   |
| Hospital-eff-F | <i>cbIA</i>                       |
| Hospital-eff-F | <i>ugd</i>                        |
| Hospital-eff-F | <i>mdtA</i>                       |
| Hospital-eff-F | <i>Isa(E)</i>                     |
| Hospital-eff-F | <i>emrA</i>                       |
| Hospital-eff-F | <i>oqxA10</i>                     |
| Hospital-eff-F | <i>blaOXA-161</i>                 |
| Hospital-eff-F | <i>bla-A</i>                      |
| Hospital-eff-F | <i>emrR</i>                       |
| Hospital-eff-F | <i>ant3''Ih-Aac6-IId</i>          |
| Hospital-eff-F | <i>blaSHV-1</i>                   |
| Hospital-eff-F | <i>qnr-S1</i>                     |
| Hospital-eff-F | <i>aac6-Im</i>                    |
| Hospital-eff-F | <i>AmpC1_Ecoli</i>                |
| Hospital-eff-F | <i>AAC(6')-Ib-cr</i>              |
| Hospital-eff-F | <i>blaOXA-13</i>                  |
| Hospital-eff-F | <i>blaOXA-256</i>                 |
| Hospital-eff-F | <i>Klebsiella_pneumoniae_KpnH</i> |
| Hospital-eff-F | <i>msbA</i>                       |
| Hospital-eff-F | <i>mdtH</i>                       |
| Hospital-eff-F | <i>blaOXA-504</i>                 |
| Hospital-eff-F | <i>baeS</i>                       |
| Hospital-eff-F | <i>blaTEM-112</i>                 |
| Hospital-eff-F | <i>catB4</i>                      |

|                |                                   |
|----------------|-----------------------------------|
| Hospital-eff-F | <i>OqxBgb</i>                     |
| Hospital-eff-F | <i>blaIMP-22</i>                  |
| Hospital-eff-F | <i>blaVIM-10</i>                  |
| Hospital-eff-F | <i>catA2</i>                      |
| Hospital-eff-F | <i>aph4-la</i>                    |
| Hospital-eff-F | <i>cepS</i>                       |
| Hospital-eff-F | <i>blaOXA-275</i>                 |
| Hospital-eff-F | <i>lin(B)</i>                     |
| Hospital-eff-F | <i>mdtM</i>                       |
| Hospital-eff-F | <i>blaOXA-667</i>                 |
| Hospital-eff-F | <i>Klebsiella_pneumoniae_KpnE</i> |
| Hospital-eff-F | <i>tet(E)</i>                     |
| Hospital-eff-F | <i>erm(T)</i>                     |
| Hospital-eff-F | <i>tet(36)</i>                    |
| Hospital-eff-F | <i>aph(3')-la</i>                 |
| Hospital-eff-F | <i>blaCTX-M-101</i>               |
| Hospital-eff-F | <i>msr(C)</i>                     |
| Hospital-eff-F | <i>efmA</i>                       |
| Hospital-eff-F | <i>vanT-G</i>                     |
| Hospital-eff-F | <i>aadA10</i>                     |
| Hospital-eff-F | <i>mcr-5.1</i>                    |
| Hospital-eff-F | <i>arr</i>                        |
| Hospital-eff-F | <i>arr2</i>                       |
| Hospital-eff-F | <i>blaOXA-299</i>                 |
| Hospital-eff-F | <i>aadA16</i>                     |
| Hospital-eff-F | <i>aadA25</i>                     |
| Hospital-eff-F | <i>qnrB19</i>                     |
| Hospital-eff-F | <i>blaSHV-103</i>                 |
| Hospital-eff-F | <i>blaEC</i>                      |
| Hospital-eff-F | <i>cfxA3</i>                      |
| Hospital-eff-F | <i>blaRCP</i>                     |
| Hospital-eff-F | <i>blaMOX-2</i>                   |
| Hospital-eff-F | <i>aph(2'')-If</i>                |
| Hospital-eff-F | <i>blaVEB-1</i>                   |
| Hospital-eff-F | <i>cepA</i>                       |
| Hospital-eff-F | <i>arr3</i>                       |
| Hospital-eff-F | <i>blaAIM-1</i>                   |
| Hospital-eff-F | <i>aadA1-pm</i>                   |
| Hospital-eff-F | <i>blaSHV-12</i>                  |
| Hospital-eff-F | <i>eat(A)</i>                     |
| Hospital-eff-F | <i>blaOXA-726</i>                 |
| Hospital-eff-F | <i>blaOXA-46</i>                  |
| Hospital-eff-F | <i>mcr-3.6</i>                    |
| Hospital-eff-F | <i>blaOXA-230</i>                 |

|                |                                     |
|----------------|-------------------------------------|
| Hospital-eff-F | <i>sat-2A</i>                       |
| Hospital-eff-F | <i>Nocardia_rifampin_resistant_</i> |
| Hospital-eff-F | <i>blaOXA-668</i>                   |
| Hospital-eff-F | <i>fosA</i>                         |
| Hospital-eff-F | <i>ant6-Ib</i>                      |
| Hospital-eff-F | <i>cfxA5</i>                        |
| Hospital-eff-F | <i>sul4</i>                         |
| Hospital-eff-F | <i>sat4</i>                         |
| Hospital-eff-F | <i>blaOXY2-1</i>                    |
| Hospital-eff-F | <i>vanXY-G2</i>                     |
| Hospital-eff-F | <i>qnrVC1</i>                       |
| Hospital-eff-F | <i>catA1</i>                        |
| Hospital-eff-F | <i>aac(6')-Ib-cr3</i>               |
| Hospital-eff-F | <i>ere(A)</i>                       |
| Hospital-eff-F | <i>blaNPS-1</i>                     |
| Hospital-eff-F | <i>AmpC2_Ecoli</i>                  |
| Hospital-eff-F | <i>blaOXA-780</i>                   |
| Hospital-eff-F | <i>spw</i>                          |
| Hospital-eff-F | <i>blaOXA-309</i>                   |
| Hospital-eff-F | <i>dfrB3</i>                        |
| Hospital-eff-F | <i>Enterobacter_cloacae_acrA</i>    |
| Hospital-eff-F | <i>vanW-G</i>                       |
| Hospital-eff-F | <i>tet(33)</i>                      |
| Hospital-eff-F | <i>blaSHV-67</i>                    |
| Hospital-eff-F | <i>blaOXY1-1</i>                    |
| Hospital-eff-F | <i>oqxB11</i>                       |
| Hospital-eff-F | <i>qnrD</i>                         |
| Hospital-eff-F | <i>oqxB15</i>                       |
| Hospital-eff-F | <i>aadA12</i>                       |
| Hospital-eff-F | <i>MexF</i>                         |
| Hospital-eff-F | <i>aadA13</i>                       |
| Hospital-eff-F | <i>smeE</i>                         |
| Hospital-eff-F | <i>ere(A2)</i>                      |
| Hospital-eff-F | <i>mef(B)</i>                       |
| Hospital-eff-F | <i>aac6-li</i>                      |
| Hospital-eff-F | <i>blaOXA-651</i>                   |
| Hospital-eff-F | <i>adeJ</i>                         |
| Hospital-eff-F | <i>aad(6)</i>                       |
| Hospital-eff-F | <i>aac6-IIa</i>                     |
| Hospital-eff-F | <i>FosA6</i>                        |
| Hospital-eff-F | <i>dfr23</i>                        |
| Hospital-eff-F | <i>MexB</i>                         |
| Hospital-eff-F | <i>blaSHV-149</i>                   |
| Hospital-eff-F | <i>blaCMY-103</i>                   |

|                |                                   |
|----------------|-----------------------------------|
| Hospital-eff-F | <i>blaTEM-156</i>                 |
| Hospital-eff-F | <i>blaACC-1</i>                   |
| Hospital-eff-F | <i>AAC(6')-Ib10</i>               |
| Hospital-eff-F | <i>blaBKC-1</i>                   |
| Hospital-eff-F | <i>dfrA1</i>                      |
| Hospital-eff-F | <i>dfrA27</i>                     |
| Hospital-eff-F | <i>blaOXA-724</i>                 |
| Hospital-eff-F | <i>blaOXA-779</i>                 |
| Hospital-eff-F | <i>aph(3')-IIc</i>                |
| Hospital-eff-F | <i>qnrB1</i>                      |
| Hospital-eff-F | <i>aac3-Vb</i>                    |
| Hospital-eff-F | <i>Klebsiella_pneumoniae_KpnF</i> |
| Hospital-eff-F | <i>dfrA12</i>                     |
| Hospital-eff-F | <i>dfrG</i>                       |
| Hospital-eff-F | <i>aci1</i>                       |
| Hospital-eff-F | <i>nimE_Nitroimidazole_Gene</i>   |
| Hospital-eff-F | <i>blaSHV-102</i>                 |
| Hospital-eff-F | <i>tet(B)</i>                     |
| Hospital-eff-F | <i>cfr-Cb</i>                     |
| Hospital-eff-F | <i>blaCPS-1</i>                   |
| Hospital-eff-F | <i>blaCTX-M-103</i>               |
| Hospital-eff-F | <i>tetA(P)</i>                    |
| Hospital-eff-F | <i>MexD</i>                       |
| Hospital-eff-F | <i>aacA47</i>                     |
| Hospital-eff-F | <i>blaEC-13</i>                   |
| Hospital-eff-F | <i>blaEC-19</i>                   |
| Hospital-eff-F | <i>blaEC-5</i>                    |
| Hospital-eff-F | <i>Salmonella_enterica_cmlA</i>   |
| Hospital-eff-F | <i>oqxB10</i>                     |
| Hospital-eff-F | <i>blaOXA-725</i>                 |
| Hospital-eff-F | <i>blaOXA-118</i>                 |
| Hospital-eff-F | <i>lnu(G)</i>                     |
| Hospital-eff-F | <i>mcr-3.1</i>                    |
| Hospital-eff-F | <i>blaOXA-644</i>                 |
| Hospital-eff-F | <i>vanD</i>                       |
| Hospital-eff-F | <i>blaOXA-228</i>                 |
| Hospital-eff-F | <i>blaOXA-257</i>                 |
| Hospital-eff-F | <i>blaOXA-392</i>                 |
| Hospital-eff-F | <i>cmlA1</i>                      |
| Hospital-eff-F | <i>Isa(C)</i>                     |
| Hospital-eff-F | <i>FosA2</i>                      |
| Hospital-eff-F | <i>aac(3)-IIa</i>                 |
| Hospital-eff-F | <i>aac(3)-IId</i>                 |
| Hospital-eff-F | <i>blaSHV-110</i>                 |



|                |                                     |
|----------------|-------------------------------------|
| Hospital-eff-F | <i>blaSHV-35</i>                    |
| Hospital-eff-F | <i>blaCTX-M-1</i>                   |
| Hospital-eff-F | <i>blaCTX-M-182</i>                 |
| Hospital-eff-F | <i>blaPAU-1</i>                     |
| Hospital-eff-F | <i>blaCMY-113</i>                   |
| Hospital-eff-F | <i>smeR</i>                         |
| Hospital-eff-F | <i>TriA</i>                         |
| Hospital-eff-F | <i>oqxA11</i>                       |
| Hospital-eff-F | <i>dfrA17</i>                       |
| Hospital-eff-F | <i>dfrA5</i>                        |
| Hospital-eff-F | <i>dhfr7</i>                        |
| Hospital-eff-F | <i>mphB</i>                         |
| Hospital-eff-F | <i>oqxB14</i>                       |
| Hospital-eff-F | <i>oqxB9</i>                        |
| Hospital-eff-F | <i>cmlA</i>                         |
| Hospital-eff-F | <i>blaOXA-464</i>                   |
| Hospital-eff-F | <i>cphA2</i>                        |
| Hospital-eff-F | <i>cphA8</i>                        |
| Hospital-eff-F | <i>imiH</i>                         |
| Hospital-eff-F | <i>vanXY-G</i>                      |
| Hospital-eff-F | <i>AAC(6')-Ib-Suzhou</i>            |
| Hospital-eff-F | <i>vanG2</i>                        |
| Hospital-eff-F | <i>aph(3')-IIa</i>                  |
| Hospital-eff-F | <i>nimA_Nitroimidazole_Gene</i>     |
| Hospital-eff-F | <i>aadA7</i>                        |
| Hospital-eff-F | <i>blaOXA-20</i>                    |
| Hospital-eff-F | <i>blaVIM-11</i>                    |
| Hospital-eff-F | <i>erm(35)</i>                      |
| Hospital-eff-F | <i>lnu((B)</i>                      |
| Hospital-eff-F | <i>aph3-Ib</i>                      |
| Hospital-eff-F | <i>car(A)</i>                       |
| Hospital-eff-F | <i>aac(6')-Ib-AKT</i>               |
| Hospital-eff-F | <i>ICR-Mo</i>                       |
| Hospital-eff-F | <i>mexK</i>                         |
| Hospital-eff-F | <i>dfrA10</i>                       |
| Hospital-eff-F | <i>Clostridium_perfringens_mprF</i> |
| Hospital-eff-F | <i>lmrD</i>                         |
| Hospital-eff-F | <i>AxyY</i>                         |
| Hospital-eff-F | <i>blaCMY-105</i>                   |
| Hospital-eff-F | <i>blaSHV-107</i>                   |
| Hospital-eff-F | <i>blaSHV-179</i>                   |
| Hospital-eff-F | <i>blaTEM-102</i>                   |
| Hospital-eff-F | <i>blaTEM-93</i>                    |
| Hospital-eff-F | <i>blaGES-1</i>                     |

|                |                               |
|----------------|-------------------------------|
| Hospital-eff-F | <i>efrA</i>                   |
| Hospital-eff-F | <i>blaLHK-6</i>               |
| Hospital-eff-F | <i>blaKPC-15</i>              |
| Hospital-eff-F | <i>blaRSC1-1</i>              |
| Hospital-eff-F | <i>catP</i>                   |
| Hospital-eff-F | <i>tet(U)</i>                 |
| Hospital-eff-F | <i>cfxA4</i>                  |
| Hospital-eff-F | <i>qnrB21</i>                 |
| Hospital-eff-F | <i>mcr-3.12</i>               |
| Hospital-eff-F | <i>qnrVC6</i>                 |
| Hospital-eff-F | <i>mtrA</i>                   |
| Hospital-eff-F | <i>oqxB12</i>                 |
| Hospital-eff-F | <i>smeC</i>                   |
| Hospital-eff-F | <i>ble-MBL</i>                |
| Hospital-eff-F | <i>OpmB</i>                   |
| Hospital-eff-F | <i>blaCCR-A</i>               |
| Hospital-eff-F | <i>ramA</i>                   |
| Hospital-eff-F | <i>blaEC-18</i>               |
| Hospital-eff-F | <i>blaEC-8</i>                |
| Hospital-eff-F | <i>blaACT-58</i>              |
| Hospital-eff-F | <i>vanS-D</i>                 |
| Hospital-eff-F | <i>mexW</i>                   |
| Hospital-eff-F | <i>cepH-A3</i>                |
| Hospital-eff-F | <i>cphA1</i>                  |
| Hospital-eff-F | <i>tet(T)</i>                 |
| Hospital-eff-F | <i>blaLCR-1</i>               |
| Hospital-eff-F | <i>tetB-P</i>                 |
| Hospital-eff-F | <i>oqxA3</i>                  |
| Hospital-eff-F | <i>aadA15</i>                 |
| Hospital-eff-F | <i>aadA3</i>                  |
| Hospital-eff-F | <i>beta-lactamase_class-C</i> |
| Hospital-eff-F | <i>blaOXA-145</i>             |
| Hospital-eff-F | <i>smeA</i>                   |
| Hospital-eff-F | <i>blaOXA-119</i>             |
| Hospital-eff-F | <i>blaOXA-240</i>             |
| Hospital-eff-F | <i>aac6</i>                   |
| Hospital-eff-F | <i>mcr-9.1</i>                |
| Hospital-eff-F | <i>nshR</i>                   |
| Hospital-eff-F | <i>blaOXA-226</i>             |
| Hospital-eff-F | <i>blaOXA-31</i>              |
| Hospital-eff-F | <i>blaOXA-320</i>             |
| Hospital-eff-F | <i>blaOXA-539</i>             |
| Hospital-eff-F | <i>blaOXA-675</i>             |
| Hospital-eff-F | <i>mepR</i>                   |

|                |                                     |
|----------------|-------------------------------------|
| Hospital-eff-F | <i>Streptomyces_rishiriensis_pa</i> |
| Hospital-eff-F | <i>erm(36)</i>                      |
| Hospital-eff-F | <i>fosA8</i>                        |
| Hospital-eff-F | <i>blaOXA-666</i>                   |
| Hospital-eff-F | <i>blaOKP-B-10</i>                  |
| Hospital-eff-F | <i>blaSHV-115</i>                   |
| Hospital-eff-F | <i>blaTEM-10</i>                    |
| Hospital-eff-F | <i>blaTEM-106</i>                   |
| Hospital-eff-F | <i>blaTEM-108</i>                   |
| Hospital-eff-F | <i>blaTEM-125</i>                   |
| Hospital-eff-F | <i>blaCTX-M-115</i>                 |
| Hospital-eff-F | <i>blaORN1a</i>                     |
| Hospital-eff-F | <i>aacA34</i>                       |
| Hospital-eff-F | <i>mexI</i>                         |
| Hospital-eff-F | <i>blaGPC-1</i>                     |
| Hospital-eff-F | <i>mexG</i>                         |
| Hospital-eff-F | <i>smeB</i>                         |
| Hospital-eff-F | <i>aph(2'')-Id</i>                  |
| Hospital-eff-F | <i>erm(49)</i>                      |
| Hospital-eff-F | <i>aac(6')-Iz</i>                   |
| Hospital-eff-F | <i>aac(6')_Steno</i>                |
| Hospital-eff-F | <i>aac(6')_Strep</i>                |
| Hospital-eff-F | <i>PmpM</i>                         |
| Hospital-eff-F | <i>vanH-D</i>                       |
| Hospital-eff-F | <i>nimD_Nitroimidazole_Gene</i>     |
| Hospital-eff-F | <i>BlaA1</i>                        |
| Hospital-eff-F | <i>qepA2</i>                        |
| Hospital-eff-F | <i>MuxC</i>                         |
| Hospital-eff-F | <i>mcr-3.17</i>                     |
| Hospital-eff-F | <i>sat4A</i>                        |
| Hospital-eff-F | <i>mfpA</i>                         |
| Hospital-eff-F | <i>ACT-16</i>                       |
| Hospital-eff-F | <i>blaACT-59</i>                    |
| Hospital-eff-F | <i>blaCMY-115</i>                   |
| Hospital-eff-F | <i>blaFOX-15</i>                    |
| Hospital-eff-F | <i>blaMOX-4</i>                     |
| Hospital-eff-F | <i>cepH</i>                         |
| Hospital-eff-F | <i>tetA(46)</i>                     |
| Hospital-eff-F | <i>tet(Y)</i>                       |
| Hospital-eff-F | <i>patB</i>                         |
| Hospital-eff-F | <i>smeD</i>                         |
| Hospital-eff-F | <i>tet(D)</i>                       |
| Hospital-eff-F | <i>tet(H)</i>                       |
| Hospital-eff-F | <i>bcr1</i>                         |

|                |                                  |
|----------------|----------------------------------|
| Hospital-eff-F | <i>aac6-lb</i>                   |
| Hospital-eff-F | <i>vanX-D</i>                    |
| Hospital-eff-F | <i>MuxB</i>                      |
| Hospital-eff-F | <i>cmlA5</i>                     |
| Hospital-eff-F | <i>catB2</i>                     |
| Hospital-eff-F | <i>catB8</i>                     |
| Hospital-eff-F | <i>MuxA</i>                      |
| Hospital-eff-F | <i>qnrE1</i>                     |
| Hospital-eff-F | <i>catA14</i>                    |
| Hospital-eff-F | <i>catA4</i>                     |
| Hospital-eff-F | <i>qnrA9</i>                     |
| Hospital-eff-F | <i>arlR</i>                      |
| Hospital-eff-F | <i>catQ</i>                      |
| Hospital-eff-F | <i>arnA</i>                      |
| Hospital-eff-F | <i>Pseudomonas_aeruginosa_Cp</i> |
| Hospital-eff-F | <i>qnrB5</i>                     |
| Hospital-eff-F | <i>vanR-C</i>                    |
| Hospital-eff-F | <i>vanT</i>                      |
| Hospital-eff-F | <i>iri</i>                       |
| Hospital-eff-F | <i>OpmH</i>                      |
| Hospital-eff-F | <i>adeK</i>                      |
| Hospital-eff-F | <i>erm(A)</i>                    |
| Hospital-eff-F | <i>erm(C)</i>                    |
| Hospital-eff-F | <i>rmtD2</i>                     |
| Hospital-eff-F | <i>cfiA11</i>                    |
| Hospital-eff-F | <i>cfiA19</i>                    |
| Hospital-eff-F | <i>cfiA23</i>                    |
| Hospital-eff-F | <i>cphA4</i>                     |
| Hospital-eff-F | <i>cphA5</i>                     |
| Hospital-eff-F | <i>blaOXA-33</i>                 |
| Hospital-eff-F | <i>imiS</i>                      |
| Hospital-eff-F | <i>TetAB</i>                     |
| Hospital-eff-F | <i>blaOXA-641</i>                |
| Hospital-eff-F | <i>erm(Q)</i>                    |
| Hospital-eff-F | <i>erm(V)</i>                    |
| Hospital-eff-F | <i>erm(O)</i>                    |
| Hospital-eff-F | <i>oqxB18</i>                    |
| Hospital-eff-F | <i>oqxB21</i>                    |
| Hospital-eff-F | <i>blaOXA-198</i>                |
| Hospital-eff-F | <i>aph(3')-IIIa</i>              |
| Hospital-eff-F | <i>blaOXA-520</i>                |
| Hospital-eff-F | <i>blaOXA-732</i>                |
| Hospital-eff-F | <i>blaOXA-736</i>                |
| Hospital-eff-F | <i>blaVIM-12</i>                 |

|                |                    |
|----------------|--------------------|
| Hospital-eff-F | <i>blaVIM-8</i>    |
| Hospital-eff-F | <i>blaOXA-129</i>  |
| Hospital-eff-F | <i>blaOXA-5</i>    |
| Hospital-eff-F | <i>aph(3')-IIb</i> |
| Hospital-eff-F | <i>mcr-10.1</i>    |
| Hospital-eff-F | <i>mcr-3.9</i>     |
| Hospital-eff-F | <i>blaOXA-22</i>   |
| Hospital-eff-F | <i>blaOXA-258</i>  |
| Hospital-eff-F | <i>sgm</i>         |
| Hospital-eff-F | <i>blaOXA-114n</i> |
| Hospital-eff-F | <i>blaOXA-114p</i> |
| Hospital-eff-F | <i>blaOXA-210</i>  |
| Hospital-eff-F | <i>blaOXA-3</i>    |
| Hospital-eff-F | <i>blaOXA-737</i>  |
| Hospital-eff-F | <i>blaOXA-838</i>  |
| Hospital-eff-F | <i>blaOXA-355</i>  |
| Hospital-eff-F | <i>blaOXA-356</i>  |
| Hospital-eff-F | <i>mph(D)</i>      |
| Hospital-eff-F | <i>blaLEN-1</i>    |
| Hospital-eff-F | <i>blaOXA-420</i>  |
| Hospital-eff-F | <i>blaOXA-512</i>  |
| Hospital-eff-F | <i>str</i>         |
| Hospital-eff-F | <i>blaCARB-42</i>  |
| Hospital-eff-F | <i>blaTEM-199</i>  |
| Hospital-eff-F | <i>aac3-Xa</i>     |
| Hospital-eff-F | <i>blaTER-1</i>    |
| Hospital-eff-F | <i>erm(X)</i>      |
| Hospital-eff-F | <i>ole(B)</i>      |
| Hospital-eff-F | <i>blaTEM-178</i>  |
| Hospital-eff-F | <i>blaGES-23</i>   |
| Hospital-eff-F | <i>blaOKP-B-11</i> |
| Hospital-eff-F | <i>blaOKP-B-17</i> |
| Hospital-eff-F | <i>blaOKP-B-4</i>  |
| Hospital-eff-F | <i>blaSHV-105</i>  |
| Hospital-eff-F | <i>blaSHV-134</i>  |
| Hospital-eff-F | <i>blaSHV-142</i>  |
| Hospital-eff-F | <i>blaSHV-143</i>  |
| Hospital-eff-F | <i>blaSHV-164</i>  |
| Hospital-eff-F | <i>blaTEM-107</i>  |
| Hospital-eff-F | <i>blaTEM-11</i>   |
| Hospital-eff-F | <i>blaTEM-110</i>  |
| Hospital-eff-F | <i>blaGES-10</i>   |
| Hospital-eff-F | <i>blaGES-11</i>   |
| Hospital-eff-F | <i>blaGES-14</i>   |

|                |                    |
|----------------|--------------------|
| Hospital-eff-F | <i>blaGES-9</i>    |
| Hospital-eff-F | <i>rph</i>         |
| Hospital-eff-F | <i>tetB(46)</i>    |
| Hospital-eff-F | <i>blaMBL1b</i>    |
| Hospital-eff-F | <i>blaCRH-2</i>    |
| Hospital-eff-F | <i>blaESP-1</i>    |
| Hospital-eff-F | <i>blaL1</i>       |
| Hospital-eff-F | <i>blaOXY6-1</i>   |
| Hospital-eff-F | <i>blaERP-1</i>    |
| Hospital-eff-F | <i>blaKPC-10</i>   |
| Hospital-eff-F | <i>blaKPC-21</i>   |
| Hospital-eff-F | <i>penI_Bp</i>     |
| Hospital-eff-F | <i>blaSPR-1</i>    |
| Hospital-eff-F | <i>aph(2'')-Ib</i> |
| Hospital-eff-F | <i>blaVEB-3</i>    |
| Hospital-eff-F | <i>mph(C)</i>      |
| Hospital-eff-F | <i>mph(F)</i>      |
| Hospital-eff-F | <i>blaEFM-1</i>    |
| Hospital-eff-F | <i>blaLRA-7</i>    |
| Hospital-eff-F | <i>blaRm3</i>      |
| Hospital-eff-F | <i>aph(2'')-Ic</i> |
| Hospital-eff-F | <i>aph(6)-Ia</i>   |
| Hospital-eff-F | <i>aph9-Ib</i>     |
| Hospital-eff-F | <i>blaPER-2</i>    |
| Hospital-eff-F | <i>erm(S)</i>      |
| Hospital-eff-F | <i>blaDES-1</i>    |
| Hospital-eff-F | <i>blaL</i>        |
| Hospital-eff-F | <i>ole(C)</i>      |
| Hospital-eff-F | <i>blaSGM-6</i>    |
| Hospital-eff-F | <i>erm(30)</i>     |
| Hospital-eff-F | <i>vanA-D</i>      |
| Hospital-eff-F | <i>vanN</i>        |
| Hospital-eff-F | <i>vanY-D</i>      |
| Hospital-eff-F | <i>cfr(B)</i>      |
| Hospital-eff-F | <i>oqxB13</i>      |
| Hospital-eff-F | <i>oqxB16</i>      |
| Hospital-eff-F | <i>oqxB17</i>      |
| Hospital-eff-F | <i>oqxB8</i>       |
| Hospital-eff-F | <i>vanSc4</i>      |
| Hospital-eff-F | <i>vanS-E</i>      |
| Hospital-eff-F | <i>vanG-Cd</i>     |
| Hospital-eff-F | <i>mexJ</i>        |
| Hospital-eff-F | <i>mexV</i>        |
| Hospital-eff-F | <i>blaSRT-1</i>    |

|                |                        |
|----------------|------------------------|
| Hospital-eff-F | <i>blaDHA-13</i>       |
| Hospital-eff-F | <i>vanS-Cd</i>         |
| Hospital-eff-F | <i>blaACT-2</i>        |
| Hospital-eff-F | <i>blaACT-57</i>       |
| Hospital-eff-F | <i>blaACT-8</i>        |
| Hospital-eff-F | <i>CMY2-MIR-ACT-EC</i> |
| Hospital-eff-F | <i>blaFOX-2</i>        |
| Hospital-eff-F | <i>blaFOX-4</i>        |
| Hospital-eff-F | <i>blaTRU-1</i>        |
| Hospital-eff-F | <i>blaMOX-12</i>       |
| Hospital-eff-F | <i>blaMOX-6</i>        |
| Hospital-eff-F | <i>MexA</i>            |
| Hospital-eff-F | <i>vanS-Pt</i>         |
| Hospital-eff-F | <i>MexC</i>            |
| Hospital-eff-F | <i>Tet(53)</i>         |
| Hospital-eff-F | <i>blaLHK-2</i>        |
| Hospital-eff-F | <i>blaACC-1c</i>       |
| Hospital-eff-F | <i>AxyX</i>            |
| Hospital-eff-F | <i>emeA</i>            |
| Hospital-eff-F | <i>tet(30)</i>         |
| Hospital-eff-F | <i>blaPDC-1</i>        |
| Hospital-eff-F | <i>blaPDC-133</i>      |
| Hospital-eff-F | <i>tet(J)</i>          |
| Hospital-eff-F | <i>ceoA</i>            |
| Hospital-eff-F | <i>sulX</i>            |
| Hospital-eff-F | <i>tet(42)</i>         |
| Hospital-eff-F | <i>cmIV</i>            |
| Hospital-eff-F | <i>abeM</i>            |
| Hospital-eff-F | <i>tet(38)</i>         |
| Hospital-eff-F | <i>mtrE</i>            |
| Hospital-eff-F | <i>rox</i>             |
| Hospital-eff-F | <i>opmD</i>            |
| Hospital-eff-F | <i>opmE</i>            |
| Hospital-eff-F | <i>Isa(A)</i>          |
| Hospital-eff-F | <i>TriC</i>            |
| Hospital-eff-F | <i>emrB</i>            |
| Hospital-eff-F | <i>tcr-3</i>           |
| Hospital-eff-F | <i>mexN</i>            |
| Hospital-eff-F | <i>oqxB24</i>          |
| Hospital-eff-F | <i>oqxB31</i>          |
| Hospital-eff-F | <i>tcmA</i>            |
| Hospital-eff-F | <i>mcr-3.15</i>        |
| Hospital-eff-F | <i>TlrC</i>            |
| Hospital-eff-F | <i>mcr-3.10</i>        |

|                |                                    |
|----------------|------------------------------------|
| Hospital-eff-F | <i>srm(B)</i>                      |
| Hospital-eff-F | <i>facT</i>                        |
| Hospital-eff-F | <i>tet(S)</i>                      |
| Hospital-eff-F | <i>taeA</i>                        |
| Hospital-eff-F | <i>otrA</i>                        |
| Hospital-eff-F | <i>vanT-C</i>                      |
| Hospital-eff-F | <i>PBP1a</i>                       |
| Hospital-eff-F | <i>Listeria_monocytogenes_mprt</i> |
| Hospital-eff-F | <i>ceoB</i>                        |
| Hospital-eff-F | <i>adeB</i>                        |
| Hospital-eff-F | <i>cmeB</i>                        |
| Hospital-eff-F | <i>mexY</i>                        |
| Hospital-eff-F | <i>oqxB20</i>                      |
| Hospital-eff-F | <i>oqxB22</i>                      |
| Hospital-eff-F | <i>oqxB23</i>                      |
| Hospital-eff-F | <i>oqxB26</i>                      |
| Hospital-eff-F | <i>oqxB27</i>                      |
| Hospital-eff-F | <i>oqxB7</i>                       |
| Hospital-eff-F | <i>mdsB</i>                        |
| Hospital-eff-A | <i>msr(E)</i>                      |
| Hospital-eff-A | <i>mph(E)</i>                      |
| Hospital-eff-A | <i>tet(39)</i>                     |
| Hospital-eff-A | <i>erm(B)</i>                      |
| Hospital-eff-A | <i>blaMCA</i>                      |
| Hospital-eff-A | <i>blaOXA-164</i>                  |
| Hospital-eff-A | <i>aph(3'')-Ib</i>                 |
| Hospital-eff-A | <i>aph(6)-Id</i>                   |
| Hospital-eff-A | <i>aac3-IIIe</i>                   |
| Hospital-eff-A | <i>aac6-Aph2</i>                   |
| Hospital-eff-A | <i>tet(Q)</i>                      |
| Hospital-eff-A | <i>AAC(6')-IIa</i>                 |
| Hospital-eff-A | <i>blaOXA-141</i>                  |
| Hospital-eff-A | <i>aadA27</i>                      |
| Hospital-eff-A | <i>blaOXA-10</i>                   |
| Hospital-eff-A | <i>blaOXA-139</i>                  |
| Hospital-eff-A | <i>blaOXA-211</i>                  |
| Hospital-eff-A | <i>aac(3)-I</i>                    |
| Hospital-eff-A | <i>tet(W)</i>                      |
| Hospital-eff-A | <i>blaOXA-280</i>                  |
| Hospital-eff-A | <i>sul1</i>                        |
| Hospital-eff-A | <i>sul2</i>                        |
| Hospital-eff-A | <i>tet(O)</i>                      |
| Hospital-eff-A | <i>ant(3'')-IIa</i>                |
| Hospital-eff-A | <i>vanZ-A</i>                      |



|                |                                            |
|----------------|--------------------------------------------|
| Hospital-eff-A | <i>vanY-A</i>                              |
| Hospital-eff-A | <i>blaOXA-281</i>                          |
| Hospital-eff-A | <i>tet(M)</i>                              |
| Hospital-eff-A | <i>AAC(6')-30/AAC(6')-Ib' fusion prote</i> |
| Hospital-eff-A | <i>aadA1</i>                               |
| Hospital-eff-A | <i>blaOXA-160</i>                          |
| Hospital-eff-A | <i>erm(F)</i>                              |
| Hospital-eff-A | <i>aacA-AC11</i>                           |
| Hospital-eff-A | <i>blaOXA-333</i>                          |
| Hospital-eff-A | <i>mef(A)</i>                              |
| Hospital-eff-A | <i>aac3-IId</i>                            |
| Hospital-eff-A | <i>ant(2'')-Ia</i>                         |
| Hospital-eff-A | <i>aac(3)-IIe</i>                          |
| Hospital-eff-A | <i>msr(D)</i>                              |
| Hospital-eff-A | <i>blaPER-1</i>                            |
| Hospital-eff-A | <i>aph3-VIb</i>                            |
| Hospital-eff-A | <i>aac3-Ib</i>                             |
| Hospital-eff-A | <i>aacA38</i>                              |
| Hospital-eff-A | <i>tet(C)</i>                              |
| Hospital-eff-A | <i>aac3-Ib-Aac6-Ib</i>                     |
| Hospital-eff-A | <i>qacH</i>                                |
| Hospital-eff-A | <i>cfxA6</i>                               |
| Hospital-eff-A | <i>cfxA</i>                                |
| Hospital-eff-A | <i>ant(3'')-IIc</i>                        |
| Hospital-eff-A | <i>aph(3')-VIa</i>                         |
| Hospital-eff-A | <i>AAC(6')-Ib7</i>                         |
| Hospital-eff-A | <i>lnu(AN2)</i>                            |
| Hospital-eff-A | <i>blaOXA-2</i>                            |
| Hospital-eff-A | <i>aac3-IIa</i>                            |
| Hospital-eff-A | <i>blaOXA-296</i>                          |
| Hospital-eff-A | <i>aadE</i>                                |
| Hospital-eff-A | <i>Bifidobacterium_adolescentis_rpoB_</i>  |
| Hospital-eff-A | <i>tet(A)</i>                              |
| Hospital-eff-A | <i>blaOXA-652</i>                          |
| Hospital-eff-A | <i>aadS</i>                                |
| Hospital-eff-A | <i>strB</i>                                |
| Hospital-eff-A | <i>Mef(En2)</i>                            |
| Hospital-eff-A | <i>ere(B)</i>                              |
| Hospital-eff-A | <i>TEM-1</i>                               |
| Hospital-eff-A | <i>blaOXA-643</i>                          |
| Hospital-eff-A | <i>tet(40)</i>                             |
| Hospital-eff-A | <i>tet(X)</i>                              |
| Hospital-eff-A | <i>mef(C)</i>                              |
| Hospital-eff-A | <i>cmxA</i>                                |

|                |                     |
|----------------|---------------------|
| Hospital-eff-A | <i>dfrF</i>         |
| Hospital-eff-A | <i>aac3-I</i>       |
| Hospital-eff-A | <i>blaOXA-212</i>   |
| Hospital-eff-A | <i>blaOXA-662</i>   |
| Hospital-eff-A | <i>blaOXA-18</i>    |
| Hospital-eff-A | <i>blaOXA-373</i>   |
| Hospital-eff-A | <i>erm(G)</i>       |
| Hospital-eff-A | <i>aph(2'')-IIa</i> |
| Hospital-eff-A | <i>blaPSE-4</i>     |
| Hospital-eff-A | <i>blaOXA-347</i>   |
| Hospital-eff-A | <i>tet(32)</i>      |
| Hospital-eff-A | <i>aac(6')-Ib-G</i> |
| Hospital-eff-A | <i>vanA-G</i>       |
| Hospital-eff-A | <i>catB3</i>        |
| Hospital-eff-A | <i>tet(R)</i>       |
| Hospital-eff-A | <i>aac6-Ig</i>      |
| Hospital-eff-A | <i>gadX</i>         |
| Hospital-eff-A | <i>aac3-IIc</i>     |
| Hospital-eff-A | <i>blaOXA-334</i>   |
| Hospital-eff-A | <i>CblA-1</i>       |
| Hospital-eff-A | <i>blaOXA-15</i>    |
| Hospital-eff-A | <i>blaOXA-1</i>     |
| Hospital-eff-A | <i>aadA24</i>       |
| Hospital-eff-A | <i>blaOXA-650</i>   |
| Hospital-eff-A | <i>blaOXA-9</i>     |
| Hospital-eff-A | <i>mph(A)</i>       |
| Hospital-eff-A | <i>ere(D)</i>       |
| Hospital-eff-A | <i>aph(3')-VI</i>   |
| Hospital-eff-A | <i>aadA2</i>        |
| Hospital-eff-A | <i>aadA5</i>        |
| Hospital-eff-A | <i>aac(6')-Im</i>   |
| Hospital-eff-A | <i>catA13</i>       |
| Hospital-eff-A | <i>tet(G)</i>       |
| Hospital-eff-A | <i>blaOXA-275</i>   |
| Hospital-eff-A | <i>mdtF</i>         |
| Hospital-eff-A | <i>vanA-A</i>       |
| Hospital-eff-A | <i>mph(G)</i>       |
| Hospital-eff-A | <i>vanH-A</i>       |
| Hospital-eff-A | <i>vanS-A</i>       |
| Hospital-eff-A | <i>vanX-A</i>       |
| Hospital-eff-A | <i>blaOXA-24</i>    |
| Hospital-eff-A | <i>floR</i>         |
| Hospital-eff-A | <i>aph(3'')-Ia</i>  |
| Hospital-eff-A | <i>vanY-B</i>       |

|                |                                             |
|----------------|---------------------------------------------|
| Hospital-eff-A | <i>blaCTX-M-101</i>                         |
| Hospital-eff-A | <i>cpxA</i>                                 |
| Hospital-eff-A | <i>aph4-Ia</i>                              |
| Hospital-eff-A | <i>erm(T)</i>                               |
| Hospital-eff-A | <i>CRP</i>                                  |
| Hospital-eff-A | <i>vanX-B</i>                               |
| Hospital-eff-A | <i>vanR-A</i>                               |
| Hospital-eff-A | <i>aadA6</i>                                |
| Hospital-eff-A | <i>AAC(6')-Ib-cr</i>                        |
| Hospital-eff-A | <i>aph(3'')-III</i>                         |
| Hospital-eff-A | <i>aadB</i>                                 |
| Hospital-eff-A | <i>mdtP</i>                                 |
| Hospital-eff-A | <i>aac(3)-IVa</i>                           |
| Hospital-eff-A | <i>gadW</i>                                 |
| Hospital-eff-A | <i>vanH-B</i>                               |
| Hospital-eff-A | <i>mdtE</i>                                 |
| Hospital-eff-A | <i>emrA</i>                                 |
| Hospital-eff-A | <i>tetR(G)</i>                              |
| Hospital-eff-A | <i>acrE</i>                                 |
| Hospital-eff-A | <i>dfrA14</i>                               |
| Hospital-eff-A | <i>arr-8</i>                                |
| Hospital-eff-A | <i>Escherichia_coli_acrA</i>                |
| Hospital-eff-A | <i>aac(3)-Ia</i>                            |
| Hospital-eff-A | <i>Penicillin_Binding_Protein_Ecoli</i>     |
| Hospital-eff-A | <i>acrF</i>                                 |
| Hospital-eff-A | <i>bacA</i>                                 |
| Hospital-eff-A | <i>mdtN</i>                                 |
| Hospital-eff-A | <i>vanW-B</i>                               |
| Hospital-eff-A | <i>aadA17</i>                               |
| Hospital-eff-A | <i>blaOXA-299</i>                           |
| Hospital-eff-A | <i>blaOXA-836</i>                           |
| Hospital-eff-A | <i>blaAER-1</i>                             |
| Hospital-eff-A | <i>eptA</i>                                 |
| Hospital-eff-A | <i>blaOXA-645</i>                           |
| Hospital-eff-A | <i>Klebsiella_pneumoniae_KpnH</i>           |
| Hospital-eff-A | <i>mdtO</i>                                 |
| Hospital-eff-A | <i>mdtG</i>                                 |
| Hospital-eff-A | <i>Bifidobacteria_intrinsic_ileS_confer</i> |
| Hospital-eff-A | <i>vanS-B</i>                               |
| Hospital-eff-A | <i>catS</i>                                 |
| Hospital-eff-A | <i>baeS</i>                                 |
| Hospital-eff-A | <i>yojI</i>                                 |
| Hospital-eff-A | <i>acrB</i>                                 |
| Hospital-eff-A | <i>acrS</i>                                 |

|                |                              |
|----------------|------------------------------|
| Hospital-eff-A | <i>msbA</i>                  |
| Hospital-eff-A | <i>dfr23</i>                 |
| Hospital-eff-A | <i>qnr-S1</i>                |
| Hospital-eff-A | <i>lnu(C)</i>                |
| Hospital-eff-A | <i>aac6-Im</i>               |
| Hospital-eff-A | <i>vanR-B</i>                |
| Hospital-eff-A | <i>mdtC</i>                  |
| Hospital-eff-A | <i>emrK</i>                  |
| Hospital-eff-A | <i>catA2</i>                 |
| Hospital-eff-A | <i>blaOXA-209</i>            |
| Hospital-eff-A | <i>ant3"Th-Aac6-IId</i>      |
| Hospital-eff-A | <i>aacA-ACI6</i>             |
| Hospital-eff-A | <i>aac(6')-30</i>            |
| Hospital-eff-A | <i>mdtH</i>                  |
| Hospital-eff-A | <i>vanB</i>                  |
| Hospital-eff-A | <i>tolC</i>                  |
| Hospital-eff-A | <i>acrD</i>                  |
| Hospital-eff-A | <i>emrY</i>                  |
| Hospital-eff-A | <i>aad9</i>                  |
| Hospital-eff-A | <i>lin(B)</i>                |
| Hospital-eff-A | <i>mdtB</i>                  |
| Hospital-eff-A | <i>baeR</i>                  |
| Hospital-eff-A | <i>emrR</i>                  |
| Hospital-eff-A | <i>mdtM</i>                  |
| Hospital-eff-A | <i>sat4</i>                  |
| Hospital-eff-A | <i>evgS</i>                  |
| Hospital-eff-A | <i>floR2</i>                 |
| Hospital-eff-A | <i>pmrF</i>                  |
| Hospital-eff-A | <i>aadA1-pm</i>              |
| Hospital-eff-A | <i>ugd</i>                   |
| Hospital-eff-A | <i>Escherichia_coli_mdfA</i> |
| Hospital-eff-A | <i>qnrS2</i>                 |
| Hospital-eff-A | <i>kdpE</i>                  |
| Hospital-eff-A | <i>lsa(E)</i>                |
| Hospital-eff-A | <i>ampH_Ecoli</i>            |
| Hospital-eff-A | <i>dfrB1</i>                 |
| Hospital-eff-A | <i>cfxA_gen</i>              |
| Hospital-eff-A | <i>aadA11</i>                |
| Hospital-eff-A | <i>blaOXA-427</i>            |
| Hospital-eff-A | <i>bla-A</i>                 |
| Hospital-eff-A | <i>cfr(C)</i>                |
| Hospital-eff-A | <i>blaMOX-9</i>              |
| Hospital-eff-A | <i>arr3</i>                  |
| Hospital-eff-A | <i>blaOXA-667</i>            |

|                |                                   |
|----------------|-----------------------------------|
| Hospital-eff-A | <i>AmpC1_Ecoli</i>                |
| Hospital-eff-A | <i>blaTEM-112</i>                 |
| Hospital-eff-A | <i>blaOXA-205</i>                 |
| Hospital-eff-A | <i>blaVIM-10</i>                  |
| Hospital-eff-A | <i>blaIMP-22</i>                  |
| Hospital-eff-A | <i>AAC(6')-Ib8</i>                |
| Hospital-eff-A | <i>blaOXA-161</i>                 |
| Hospital-eff-A | <i>aac(6')-Ib-AKT</i>             |
| Hospital-eff-A | <i>nimD_Nitroimidazole_Gene</i>   |
| Hospital-eff-A | <i>aadA13</i>                     |
| Hospital-eff-A | <i>blaOXA-13</i>                  |
| Hospital-eff-A | <i>arr</i>                        |
| Hospital-eff-A | <i>arr2</i>                       |
| Hospital-eff-A | <i>blaOXA-668</i>                 |
| Hospital-eff-A | <i>ampH</i>                       |
| Hospital-eff-A | <i>mdtA</i>                       |
| Hospital-eff-A | <i>blaOXA-101</i>                 |
| Hospital-eff-A | <i>AmpC2_Ecoli</i>                |
| Hospital-eff-A | <i>aph(3')-Ia</i>                 |
| Hospital-eff-A | <i>H-NS</i>                       |
| Hospital-eff-A | <i>Klebsiella_pneumoniae_KpnG</i> |
| Hospital-eff-A | <i>aadA16</i>                     |
| Hospital-eff-A | <i>blaSHV-107</i>                 |
| Hospital-eff-A | <i>AAC(6')-Ib-Suzhou</i>          |
| Hospital-eff-A | <i>sat-2A</i>                     |
| Hospital-eff-A | <i>cblA</i>                       |
| Hospital-eff-A | <i>Salmonella_enterica_cmlA</i>   |
| Hospital-eff-A | <i>aph7</i>                       |
| Hospital-eff-A | <i>Klebsiella_pneumoniae_acrA</i> |
| Hospital-eff-A | <i>blaOXA-230</i>                 |
| Hospital-eff-A | <i>msr(C)</i>                     |
| Hospital-eff-A | <i>aadA10</i>                     |
| Hospital-eff-A | <i>SHV-1</i>                      |
| Hospital-eff-A | <i>marA</i>                       |
| Hospital-eff-A | <i>aadA12</i>                     |
| Hospital-eff-A | <i>aadA25</i>                     |
| Hospital-eff-A | <i>blaOXA-504</i>                 |
| Hospital-eff-A | <i>tet(B)</i>                     |
| Hospital-eff-A | <i>tet(E)</i>                     |
| Hospital-eff-A | <i>evgA</i>                       |
| Hospital-eff-A | <i>fosA_gen</i>                   |
| Hospital-eff-A | <i>str</i>                        |
| Hospital-eff-A | <i>efmA</i>                       |
| Hospital-eff-A | <i>blaTEM-156</i>                 |

|                |                                     |
|----------------|-------------------------------------|
| Hospital-eff-A | <i>Escherichia_coli_emrE</i>        |
| Hospital-eff-A | <i>tet(44)</i>                      |
| Hospital-eff-A | <i>eat(A)</i>                       |
| Hospital-eff-A | <i>spw</i>                          |
| Hospital-eff-A | <i>dfrA17</i>                       |
| Hospital-eff-A | <i>mphB</i>                         |
| Hospital-eff-A | <i>ICR-Mo</i>                       |
| Hospital-eff-A | <i>aac(3)-IIa</i>                   |
| Hospital-eff-A | <i>blaTEM-102</i>                   |
| Hospital-eff-A | <i>dfrG</i>                         |
| Hospital-eff-A | <i>blaCTX-M-103</i>                 |
| Hospital-eff-A | <i>blaRCP</i>                       |
| Hospital-eff-A | <i>tet(36)</i>                      |
| Hospital-eff-A | <i>CARB-3</i>                       |
| Hospital-eff-A | <i>catA1</i>                        |
| Hospital-eff-A | <i>MexF</i>                         |
| Hospital-eff-A | <i>catB4</i>                        |
| Hospital-eff-A | <i>blaOXA-309</i>                   |
| Hospital-eff-A | <i>aad(6)</i>                       |
| Hospital-eff-A | <i>aac(6')-Ib-cr3</i>               |
| Hospital-eff-A | <i>blaOXA-420</i>                   |
| Hospital-eff-A | <i>blaTEM-10</i>                    |
| Hospital-eff-A | <i>CARB-2</i>                       |
| Hospital-eff-A | <i>blaBES-1</i>                     |
| Hospital-eff-A | <i>cphA2</i>                        |
| Hospital-eff-A | <i>cmlA1</i>                        |
| Hospital-eff-A | <i>tetA(P)</i>                      |
| Hospital-eff-A | <i>blaOXA-724</i>                   |
| Hospital-eff-A | <i>blaOXA-256</i>                   |
| Hospital-eff-A | <i>blaOXA-46</i>                    |
| Hospital-eff-A | <i>blaEC</i>                        |
| Hospital-eff-A | <i>vanT-G</i>                       |
| Hospital-eff-A | <i>nimj_Nitroimidazole_Gene</i>     |
| Hospital-eff-A | <i>blaOXA-356</i>                   |
| Hospital-eff-A | <i>SHV-12</i>                       |
| Hospital-eff-A | <i>erm(X)</i>                       |
| Hospital-eff-A | <i>ant6-Ib</i>                      |
| Hospital-eff-A | <i>cfr-Cb</i>                       |
| Hospital-eff-A | <i>nimA_Nitroimidazole_Gene</i>     |
| Hospital-eff-A | <i>tetB-P</i>                       |
| Hospital-eff-A | <i>aph(2'')-If</i>                  |
| Hospital-eff-A | <i>cepA_beta-lactamase</i>          |
| Hospital-eff-A | <i>Klebsiella_pneumoniae_OmpK37</i> |
| Hospital-eff-A | <i>ramA</i>                         |

|                |                                           |
|----------------|-------------------------------------------|
| Hospital-eff-A | <i>cepS</i>                               |
| Hospital-eff-A | <i>cfxA3</i>                              |
| Hospital-eff-A | <i>OqxA</i>                               |
| Hospital-eff-A | <i>oqxB11</i>                             |
| Hospital-eff-A | <i>blaOXA-726</i>                         |
| Hospital-eff-A | <i>mcr-10.1</i>                           |
| Hospital-eff-A | <i>ere(A)</i>                             |
| Hospital-eff-A | <i>blaOXA-228</i>                         |
| Hospital-eff-A | <i>mph(D)</i>                             |
| Hospital-eff-A | <i>vanYD</i>                              |
| Hospital-eff-A | <i>OqxBgb</i>                             |
| Hospital-eff-A | <i>qnrVC1</i>                             |
| Hospital-eff-A | <i>blaEC-19</i>                           |
| Hospital-eff-A | <i>qnrB17</i>                             |
| Hospital-eff-A | <i>blaMOX-2</i>                           |
| Hospital-eff-A | <i>mcr-5.1</i>                            |
| Hospital-eff-A | <i>dfrA27</i>                             |
| Hospital-eff-A | <i>Enterobacter_cloacae_acrA</i>          |
| Hospital-eff-A | <i>lsa(C)</i>                             |
| Hospital-eff-A | <i>tetB(46)</i>                           |
| Hospital-eff-A | <i>erm(Q)</i>                             |
| Hospital-eff-A | <i>blaNPS-1</i>                           |
| Hospital-eff-A | <i>cfr(B)</i>                             |
| Hospital-eff-A | <i>aadA15</i>                             |
| Hospital-eff-A | <i>aac6-Ii</i>                            |
| Hospital-eff-A | <i>blaOXA-229</i>                         |
| Hospital-eff-A | <i>aac(6')-set_A</i>                      |
| Hospital-eff-A | <i>blaOXA-512</i>                         |
| Hospital-eff-A | <i>blaOXA-96</i>                          |
| Hospital-eff-A | <i>aci1</i>                               |
| Hospital-eff-A | <i>blaDHA-1</i>                           |
| Hospital-eff-A | <i>RSA-1</i>                              |
| Hospital-eff-A | <i>blaSHV-35</i>                          |
| Hospital-eff-A | <i>sul4</i>                               |
| Hospital-eff-A | <i>Nocardia_rifampin_resistant_beta-s</i> |
| Hospital-eff-A | <i>blaCTX-M-1</i>                         |
| Hospital-eff-A | <i>blaCTX-M-182</i>                       |
| Hospital-eff-A | <i>oqxA10</i>                             |
| Hospital-eff-A | <i>tet(H)</i>                             |
| Hospital-eff-A | <i>aph(2'')-Id</i>                        |
| Hospital-eff-A | <i>AAC(6')-Ib10</i>                       |
| Hospital-eff-A | <i>ere(A2)</i>                            |
| Hospital-eff-A | <i>catP</i>                               |
| Hospital-eff-A | <i>blaBKC-1</i>                           |

|                |                                   |
|----------------|-----------------------------------|
| Hospital-eff-A | <i>cfxA5</i>                      |
| Hospital-eff-A | <i>qnrB1</i>                      |
| Hospital-eff-A | <i>vanH-D</i>                     |
| Hospital-eff-A | <i>qnrB10</i>                     |
| Hospital-eff-A | <i>qnrB26</i>                     |
| Hospital-eff-A | <i>tet(L)</i>                     |
| Hospital-eff-A | <i>tetA(46)</i>                   |
| Hospital-eff-A | <i>vanG2</i>                      |
| Hospital-eff-A | <i>oqxB15</i>                     |
| Hospital-eff-A | <i>oqxB9</i>                      |
| Hospital-eff-A | <i>efrB</i>                       |
| Hospital-eff-A | <i>Klebsiella_pneumoniae_KpnE</i> |
| Hospital-eff-A | <i>erm(47)</i>                    |
| Hospital-eff-A | <i>MecI</i>                       |
| Hospital-eff-A | <i>blaCMY-103</i>                 |
| Hospital-eff-A | <i>cphA1</i>                      |
| Hospital-eff-A | <i>vanXY-G</i>                    |
| Hospital-eff-A | <i>blaLCR-1</i>                   |
| Hospital-eff-A | <i>erm(O)</i>                     |
| Hospital-eff-A | <i>oqxA3</i>                      |
| Hospital-eff-A | <i>blaOXA-142</i>                 |
| Hospital-eff-A | <i>blaOXA-240</i>                 |
| Hospital-eff-A | <i>blaOXA-824</i>                 |
| Hospital-eff-A | <i>blaOXA-827</i>                 |
| Hospital-eff-A | <i>blaVIM-11</i>                  |
| Hospital-eff-A | <i>vanZ-Pa</i>                    |
| Hospital-eff-A | <i>mef(B)</i>                     |
| Hospital-eff-A | <i>blaOXA-644</i>                 |
| Hospital-eff-A | <i>nshR</i>                       |
| Hospital-eff-A | <i>blaOXA-392</i>                 |
| Hospital-eff-A | <i>blaOXA-257</i>                 |
| Hospital-eff-A | <i>cmlA5</i>                      |
| Hospital-eff-A | <i>FosA5</i>                      |
| Hospital-eff-A | <i>FosA6</i>                      |
| Hospital-eff-A | <i>blaOXA-397</i>                 |
| Hospital-eff-A | <i>vanW-G</i>                     |
| Hospital-eff-A | <i>fosA</i>                       |
| Hospital-eff-A | <i>blaLAP-1</i>                   |
| Hospital-eff-A | <i>fosB-251804940</i>             |
| Hospital-eff-A | <i>blaSHV-67</i>                  |
| Hospital-eff-A | <i>blaGES-1</i>                   |
| Hospital-eff-A | <i>TriC</i>                       |
| Hospital-eff-A | <i>blaCPS-1</i>                   |
| Hospital-eff-A | <i>blaCTX-M-105</i>               |



|                |                                    |
|----------------|------------------------------------|
| Hospital-eff-A | <i>cepA</i>                        |
| Hospital-eff-A | <i>blaL2</i>                       |
| Hospital-eff-A | <i>erm(49)</i>                     |
| Hospital-eff-A | <i>aac3-Ih</i>                     |
| Hospital-eff-A | <i>aph(2'')-Ig</i>                 |
| Hospital-eff-A | <i>blaPER-12</i>                   |
| Hospital-eff-A | <i>dfrA1</i>                       |
| Hospital-eff-A | <i>dhfr7</i>                       |
| Hospital-eff-A | <i>PmpM</i>                        |
| Hospital-eff-A | <i>dfrA3</i>                       |
| Hospital-eff-A | <i>dfrE</i>                        |
| Hospital-eff-A | <i>dfrA12</i>                      |
| Hospital-eff-A | <i>BlaA1</i>                       |
| Hospital-eff-A | <i>emrB</i>                        |
| Hospital-eff-A | <i>mcr-9.1</i>                     |
| Hospital-eff-A | <i>mcr-3.17</i>                    |
| Hospital-eff-A | <i>aac(6')-Ib-cr10</i>             |
| Hospital-eff-A | <i>satA_Ba</i>                     |
| Hospital-eff-A | <i>dfr1_rpt</i>                    |
| Hospital-eff-A | <i>dfrA10</i>                      |
| Hospital-eff-A | <i>mexV</i>                        |
| Hospital-eff-A | <i>blaEC-13</i>                    |
| Hospital-eff-A | <i>blaEC-5</i>                     |
| Hospital-eff-A | <i>dfrA19</i>                      |
| Hospital-eff-A | <i>blaACT-13</i>                   |
| Hospital-eff-A | <i>efrA</i>                        |
| Hospital-eff-A | <i>mexM</i>                        |
| Hospital-eff-A | <i>blaACC-1</i>                    |
| Hospital-eff-A | <i>vanS-Pt</i>                     |
| Hospital-eff-A | <i>blaOCH-1</i>                    |
| Hospital-eff-A | <i>oqxA11</i>                      |
| Hospital-eff-A | <i>tet(D)</i>                      |
| Hospital-eff-A | <i>beta-lactamase_class-C</i>      |
| Hospital-eff-A | <i>vanX-D</i>                      |
| Hospital-eff-A | <i>tet(33)</i>                     |
| Hospital-eff-A | <i>MexB</i>                        |
| Hospital-eff-A | <i>cmlA</i>                        |
| Hospital-eff-A | <i>catB7</i>                       |
| Hospital-eff-A | <i>tet(S)</i>                      |
| Hospital-eff-A | <i>qnrD</i>                        |
| Hospital-eff-A | <i>qnrB12</i>                      |
| Hospital-eff-A | <i>qnr-A1</i>                      |
| Hospital-eff-A | <i>catQ</i>                        |
| Hospital-eff-A | <i>Pseudomonas_aeruginosa_CpxR</i> |

|                |                                           |
|----------------|-------------------------------------------|
| Hospital-eff-A | <i>smeR</i>                               |
| Hospital-eff-A | <i>vanRc3</i>                             |
| Hospital-eff-A | <i>vanR-D</i>                             |
| Hospital-eff-A | <i>vanR-O</i>                             |
| Hospital-eff-A | <i>Streptomyces_rishiriensis_parY_mut</i> |
| Hospital-eff-A | <i>blaCAM-1</i>                           |
| Hospital-eff-A | <i>erm(A)</i>                             |
| Hospital-eff-A | <i>blaIMP-13</i>                          |
| Hospital-eff-A | <i>lsa(A)</i>                             |
| Hospital-eff-A | <i>rmtH</i>                               |
| Hospital-eff-A | <i>blaOXA-460</i>                         |
| Hospital-eff-A | <i>mexW</i>                               |
| Hospital-eff-A | <i>cepH-A3</i>                            |
| Hospital-eff-A | <i>imiH</i>                               |
| Hospital-eff-A | <i>blaOXA-33</i>                          |
| Hospital-eff-A | <i>qepA2</i>                              |
| Hospital-eff-A | <i>blaOXA-589</i>                         |
| Hospital-eff-A | <i>aphA6</i>                              |
| Hospital-eff-A | <i>oqxB19</i>                             |
| Hospital-eff-A | <i>aadA4</i>                              |
| Hospital-eff-A | <i>blaLEN-11</i>                          |
| Hospital-eff-A | <i>blaOXA-485</i>                         |
| Hospital-eff-A | <i>aadA3</i>                              |
| Hospital-eff-A | <i>aph3-Vb</i>                            |
| Hospital-eff-A | <i>adeJ</i>                               |
| Hospital-eff-A | <i>blaOXA-725</i>                         |
| Hospital-eff-A | <i>blaOXA-780</i>                         |
| Hospital-eff-A | <i>aadA8</i>                              |
| Hospital-eff-A | <i>aph(3')-IX</i>                         |
| Hospital-eff-A | <i>blaOXA-118</i>                         |
| Hospital-eff-A | <i>blaOXA-119</i>                         |
| Hospital-eff-A | <i>blaOXA-20</i>                          |
| Hospital-eff-A | <i>blaOXA-233</i>                         |
| Hospital-eff-A | <i>blaOXA-251</i>                         |
| Hospital-eff-A | <i>blaOXA-655</i>                         |
| Hospital-eff-A | <i>blaOXA-779</i>                         |
| Hospital-eff-A | <i>aph(3')-IIc</i>                        |
| Hospital-eff-A | <i>blaOXA-129</i>                         |
| Hospital-eff-A | <i>lmu((B)</i>                            |
| Hospital-eff-A | <i>blaOXA-136</i>                         |
| Hospital-eff-A | <i>sph-I</i>                              |
| Hospital-eff-A | <i>tsnR</i>                               |
| Hospital-eff-A | <i>aph(3')-Ib</i>                         |
| Hospital-eff-A | <i>lmu(F)</i>                             |

|                |                    |
|----------------|--------------------|
| Hospital-eff-A | <i>tlr(C)</i>      |
| Hospital-eff-A | <i>blaOXA-22</i>   |
| Hospital-eff-A | <i>blaOXA-441</i>  |
| Hospital-eff-A | <i>blaOXA-651</i>  |
| Hospital-eff-A | <i>blaOXA-114</i>  |
| Hospital-eff-A | <i>blaOXA-114u</i> |
| Hospital-eff-A | <i>blaOXA-25</i>   |
| Hospital-eff-A | <i>blaOXA-26</i>   |
| Hospital-eff-A | <i>blaOXA-32</i>   |
| Hospital-eff-A | <i>blaOXA-364</i>  |
| Hospital-eff-A | <i>blaOXA-415</i>  |
| Hospital-eff-A | <i>blaOXA-224</i>  |
| Hospital-eff-A | <i>blaOXA-355</i>  |
| Hospital-eff-A | <i>blaOXA-568</i>  |
| Hospital-eff-A | <i>blaSPN79-1</i>  |
| Hospital-eff-A | <i>blaLEN-1</i>    |
| Hospital-eff-A | <i>erm(32)</i>     |
| Hospital-eff-A | <i>otr(B)</i>      |
| Hospital-eff-A | <i>aac3-Xa</i>     |
| Hospital-eff-A | <i>blaTER-2</i>    |
| Hospital-eff-A | <i>ant(6)-Ic</i>   |
| Hospital-eff-A | <i>blaOKP-B-1</i>  |
| Hospital-eff-A | <i>blaSHV-105</i>  |
| Hospital-eff-A | <i>blaSHV-11</i>   |
| Hospital-eff-A | <i>blaSHV-115</i>  |
| Hospital-eff-A | <i>blaSHV-119</i>  |
| Hospital-eff-A | <i>blaSHV-128</i>  |
| Hospital-eff-A | <i>blaSHV-164</i>  |
| Hospital-eff-A | <i>blaSHV-179</i>  |
| Hospital-eff-A | <i>blaSHV-40</i>   |
| Hospital-eff-A | <i>blaTEM-145</i>  |
| Hospital-eff-A | <i>blaTEM-21</i>   |
| Hospital-eff-A | <i>blaTEM-213</i>  |
| Hospital-eff-A | <i>blaTEM-93</i>   |
| Hospital-eff-A | <i>CARB-1</i>      |
| Hospital-eff-A | <i>CARB-6</i>      |
| Hospital-eff-A | <i>blaL1</i>       |
| Hospital-eff-A | <i>blaESP-1</i>    |
| Hospital-eff-A | <i>blaOXY5-1</i>   |
| Hospital-eff-A | <i>blaOXY1-1</i>   |
| Hospital-eff-A | <i>blaIMI-16</i>   |
| Hospital-eff-A | <i>blaOXA-154</i>  |
| Hospital-eff-A | <i>blaPAU-1</i>    |
| Hospital-eff-A | <i>blaA</i>        |

|                |                        |
|----------------|------------------------|
| Hospital-eff-A | <i>blaSED</i>          |
| Hospital-eff-A | <i>aph(2'')-Ib</i>     |
| Hospital-eff-A | <i>blaVEB-1</i>        |
| Hospital-eff-A | <i>mph(F)</i>          |
| Hospital-eff-A | <i>blaAIM-1</i>        |
| Hospital-eff-A | <i>blaR39</i>          |
| Hospital-eff-A | <i>blaCBP-1</i>        |
| Hospital-eff-A | <i>blaPER-11</i>       |
| Hospital-eff-A | <i>blaPER-7</i>        |
| Hospital-eff-A | <i>blaAST-1</i>        |
| Hospital-eff-A | <i>erm(W)</i>          |
| Hospital-eff-A | <i>blaTHIN-B</i>       |
| Hospital-eff-A | <i>erm(S)</i>          |
| Hospital-eff-A | <i>cfxA4</i>           |
| Hospital-eff-A | <i>tet(T)</i>          |
| Hospital-eff-A | <i>otrA</i>            |
| Hospital-eff-A | <i>lmrD</i>            |
| Hospital-eff-A | <i>aph4-Ib</i>         |
| Hospital-eff-A | <i>MSI-1</i>           |
| Hospital-eff-A | <i>ceoB</i>            |
| Hospital-eff-A | <i>vanD</i>            |
| Hospital-eff-A | <i>MuxC</i>            |
| Hospital-eff-A | <i>oqxB10</i>          |
| Hospital-eff-A | <i>oqxB14</i>          |
| Hospital-eff-A | <i>oqxB16</i>          |
| Hospital-eff-A | <i>vanE</i>            |
| Hospital-eff-A | <i>vanY-D</i>          |
| Hospital-eff-A | <i>blaCSA-2</i>        |
| Hospital-eff-A | <i>vanS-C</i>          |
| Hospital-eff-A | <i>blaEC-14</i>        |
| Hospital-eff-A | <i>blaEC-18</i>        |
| Hospital-eff-A | <i>blaDHA-13</i>       |
| Hospital-eff-A | <i>blaDHA-29</i>       |
| Hospital-eff-A | <i>blaDHA-4</i>        |
| Hospital-eff-A | <i>blaACT-3</i>        |
| Hospital-eff-A | <i>blaACT-1</i>        |
| Hospital-eff-A | <i>blaACT-28</i>       |
| Hospital-eff-A | <i>CMY2-MIR-ACT-EC</i> |
| Hospital-eff-A | <i>erm(E)</i>          |
| Hospital-eff-A | <i>blaCMY-FOX</i>      |
| Hospital-eff-A | <i>blaFOX-15</i>       |
| Hospital-eff-A | <i>cepH</i>            |
| Hospital-eff-A | <i>blaMOX-8</i>        |
| Hospital-eff-A | <i>blaLHK-1</i>        |

|                |                                     |
|----------------|-------------------------------------|
| Hospital-eff-A | <i>Tet(54)</i>                      |
| Hospital-eff-A | <i>bmr</i>                          |
| Hospital-eff-A | <i>blaLHK-6</i>                     |
| Hospital-eff-A | <i>oqxA5</i>                        |
| Hospital-eff-A | <i>oqxA6</i>                        |
| Hospital-eff-A | <i>emeA</i>                         |
| Hospital-eff-A | <i>smeD</i>                         |
| Hospital-eff-A | <i>dha1</i>                         |
| Hospital-eff-A | <i>blaPDC-109</i>                   |
| Hospital-eff-A | <i>amrA</i>                         |
| Hospital-eff-A | <i>ceoA</i>                         |
| Hospital-eff-A | <i>tap</i>                          |
| Hospital-eff-A | <i>mgt</i>                          |
| Hospital-eff-A | <i>cmlA4</i>                        |
| Hospital-eff-A | <i>tetA-P</i>                       |
| Hospital-eff-A | <i>BlaA2</i>                        |
| Hospital-eff-A | <i>oleI</i>                         |
| Hospital-eff-A | <i>Acinetobacter_baumannii_AbaQ</i> |
| Hospital-eff-A | <i>cdeA</i>                         |
| Hospital-eff-A | <i>tet(K)</i>                       |
| Hospital-eff-A | <i>OprZ</i>                         |
| Hospital-eff-A | <i>smeS</i>                         |
| Hospital-eff-A | <i>basS</i>                         |
| Hospital-eff-A | <i>lmr(A)</i>                       |
| Hospital-eff-A | <i>adeK</i>                         |
| Hospital-eff-A | <i>Acinetobacter_baumannii_AmvA</i> |
| Hospital-eff-A | <i>lrfA</i>                         |
| Hospital-eff-A | <i>opcM</i>                         |
| Hospital-eff-A | <i>mexK</i>                         |
| Hospital-eff-A | <i>tcr-3</i>                        |
| Hospital-eff-A | <i>smeE</i>                         |
| Hospital-eff-A | <i>AxyY</i>                         |
| Hospital-eff-A | <i>vga(A)</i>                       |
| Hospital-eff-A | <i>vga(A)-LC</i>                    |
| Hospital-eff-A | <i>oqxB17</i>                       |
| Hospital-eff-A | <i>oqxB18</i>                       |
| Hospital-eff-A | <i>oqxB21</i>                       |
| Hospital-eff-A | <i>oqxB22</i>                       |
| Hospital-eff-A | <i>mcr-2.3</i>                      |
| Hospital-eff-A | <i>mcr-3.15</i>                     |
| Hospital-eff-A | <i>mcr-3.3</i>                      |
| Hospital-eff-A | <i>mcr-3.6</i>                      |
| Hospital-eff-A | <i>mcr-3.1</i>                      |
| Hospital-eff-A | <i>poxA</i>                         |

|                |                                      |
|----------------|--------------------------------------|
| Hospital-eff-A | <i>lmrC</i>                          |
| Hospital-eff-A | <i>facT</i>                          |
| Hospital-eff-A | <i>novA</i>                          |
| Hospital-eff-A | <i>arnA</i>                          |
| Hospital-eff-A | <i>mecB</i>                          |
| Hospital-eff-A | <i>vanTc2</i>                        |
| Hospital-eff-A | <i>PBP1a</i>                         |
| Hospital-eff-A | <i>Streptococcus_agalactiae_mprF</i> |
| Hospital-eff-A | <i>rph</i>                           |
| Hospital-eff-A | <i>mupA</i>                          |
| Hospital-eff-A | <i>mexI</i>                          |
| Hospital-eff-A | <i>cmeB</i>                          |
| Hospital-eff-A | <i>MexD</i>                          |
| Hospital-eff-A | <i>smeB</i>                          |
| Hospital-eff-A | <i>oqxB13</i>                        |
| Hospital-eff-A | <i>oqxB20</i>                        |
| Hospital-eff-A | <i>oqxB24</i>                        |
| Hospital-eff-A | <i>oqxB8</i>                         |
| Hospital-eff-A | <i>mexQ</i>                          |
| Hospital-eff-A | <i>adeF</i>                          |
| Hospital-eff-A | <i>abcA</i>                          |
| STP-inf-F      | <i>tet(Q)</i>                        |
| STP-inf-F      | <i>tet(W)</i>                        |
| STP-inf-F      | <i>msr(E)</i>                        |
| STP-inf-F      | <i>erm(B)</i>                        |
| STP-inf-F      | <i>mph(E)</i>                        |
| STP-inf-F      | <i>tet(O)</i>                        |
| STP-inf-F      | <i>tet(39)</i>                       |
| STP-inf-F      | <i>erm(F)</i>                        |
| STP-inf-F      | <i>cfxA6</i>                         |
| STP-inf-F      | <i>mef(A)</i>                        |
| STP-inf-F      | <i>aadE</i>                          |
| STP-inf-F      | <i>qacH</i>                          |
| STP-inf-F      | <i>tet(40)</i>                       |
| STP-inf-F      | <i>msr(D)</i>                        |
| STP-inf-F      | <i>cfxA</i>                          |
| STP-inf-F      | <i>tet(X)</i>                        |
| STP-inf-F      | <i>Mef(En2)</i>                      |
| STP-inf-F      | <i>vanA-G</i>                        |
| STP-inf-F      | <i>lnu(AN2)</i>                      |
| STP-inf-F      | <i>dfrF</i>                          |
| STP-inf-F      | <i>aadS</i>                          |
| STP-inf-F      | <i>mef(C)</i>                        |
| STP-inf-F      | <i>tet(32)</i>                       |

|           |                                             |
|-----------|---------------------------------------------|
| STP-inf-F | <i>tet(M)</i>                               |
| STP-inf-F | <i>aph(6)-Id</i>                            |
| STP-inf-F | <i>aph(3'')-Ib</i>                          |
| STP-inf-F | <i>CblA-1</i>                               |
| STP-inf-F | <i>blaMCA</i>                               |
| STP-inf-F | <i>blaOXA-296</i>                           |
| STP-inf-F | <i>catA13</i>                               |
| STP-inf-F | <i>sul1</i>                                 |
| STP-inf-F | <i>blaOXA-141</i>                           |
| STP-inf-F | <i>Bifidobacteria_intrinsic_ileS_confer</i> |
| STP-inf-F | <i>mph(G)</i>                               |
| STP-inf-F | <i>blaOXA-333</i>                           |
| STP-inf-F | <i>tet(C)</i>                               |
| STP-inf-F | <i>blaOXA-129</i>                           |
| STP-inf-F | <i>aadA27</i>                               |
| STP-inf-F | <i>ere(D)</i>                               |
| STP-inf-F | <i>sul2</i>                                 |
| STP-inf-F | <i>aph(3'')-III</i>                         |
| STP-inf-F | <i>blaOXA-10</i>                            |
| STP-inf-F | <i>blaAER-1</i>                             |
| STP-inf-F | <i>tet(A)</i>                               |
| STP-inf-F | <i>tet(G)</i>                               |
| STP-inf-F | <i>erm(G)</i>                               |
| STP-inf-F | <i>lnu(C)</i>                               |
| STP-inf-F | <i>AAC(6')-IIa</i>                          |
| STP-inf-F | <i>cmxA</i>                                 |
| STP-inf-F | <i>tet(R)</i>                               |
| STP-inf-F | <i>aac(3)-I</i>                             |
| STP-inf-F | <i>aadA5</i>                                |
| STP-inf-F | <i>cfr(C)</i>                               |
| STP-inf-F | <i>blaOXA-164</i>                           |
| STP-inf-F | <i>ant(3'')-IIa</i>                         |
| STP-inf-F | <i>aad9</i>                                 |
| STP-inf-F | <i>catS</i>                                 |
| STP-inf-F | <i>blaOXA-211</i>                           |
| STP-inf-F | <i>lsa(E)</i>                               |
| STP-inf-F | <i>lin(B)</i>                               |
| STP-inf-F | <i>blaOXA-118</i>                           |
| STP-inf-F | <i>blaOXA-20</i>                            |
| STP-inf-F | <i>bla-A</i>                                |
| STP-inf-F | <i>cat-TC</i>                               |
| STP-inf-F | <i>cblA</i>                                 |
| STP-inf-F | <i>blaOXA-427</i>                           |
| STP-inf-F | <i>tetR(G)</i>                              |

|           |                                   |
|-----------|-----------------------------------|
| STP-inf-F | <i>blaOXA-392</i>                 |
| STP-inf-F | <i>sat4</i>                       |
| STP-inf-F | <i>tet(44)</i>                    |
| STP-inf-F | <i>aadA6</i>                      |
| STP-inf-F | <i>cfxA_gen</i>                   |
| STP-inf-F | <i>mdtO</i>                       |
| STP-inf-F | <i>cfxA3</i>                      |
| STP-inf-F | <i>blaOXA-280</i>                 |
| STP-inf-F | <i>blaOXA-1</i>                   |
| STP-inf-F | <i>tet(S)</i>                     |
| STP-inf-F | <i>aac6-Aph2</i>                  |
| STP-inf-F | <i>aadA2</i>                      |
| STP-inf-F | <i>spw</i>                        |
| STP-inf-F | <i>Klebsiella_pneumoniae_KpnG</i> |
| STP-inf-F | <i>blaOXA-347</i>                 |
| STP-inf-F | <i>gadX</i>                       |
| STP-inf-F | <i>mdtE</i>                       |
| STP-inf-F | <i>CRP</i>                        |
| STP-inf-F | <i>aadA1</i>                      |
| STP-inf-F | <i>lnu(G)</i>                     |
| STP-inf-F | <i>tolC</i>                       |
| STP-inf-F | <i>ampH</i>                       |
| STP-inf-F | <i>aadA11</i>                     |
| STP-inf-F | <i>AAC(6')-Ib7</i>                |
| STP-inf-F | <i>msbA</i>                       |
| STP-inf-F | <i>mdtP</i>                       |
| STP-inf-F | <i>blaOXA-205</i>                 |
| STP-inf-F | <i>Escherichia_coli_mdFA</i>      |
| STP-inf-F | <i>acrF</i>                       |
| STP-inf-F | <i>cfr-Cb</i>                     |
| STP-inf-F | <i>acrE</i>                       |
| STP-inf-F | <i>mdtB</i>                       |
| STP-inf-F | <i>ICR-Mo</i>                     |
| STP-inf-F | <i>mdtF</i>                       |
| STP-inf-F | <i>Escherichia_coli_acrA</i>      |
| STP-inf-F | <i>Klebsiella_pneumoniae_acrA</i> |
| STP-inf-F | <i>acrB</i>                       |
| STP-inf-F | <i>blaOXA-666</i>                 |
| STP-inf-F | <i>blaOXA-119</i>                 |
| STP-inf-F | <i>baeS</i>                       |
| STP-inf-F | <i>Klebsiella_pneumoniae_KpnH</i> |
| STP-inf-F | <i>mdtM</i>                       |
| STP-inf-F | <i>H-NS</i>                       |
| STP-inf-F | <i>evgS</i>                       |



|           |                                           |
|-----------|-------------------------------------------|
| STP-inf-F | <i>floR2</i>                              |
| STP-inf-F | <i>ampH_Ecoli</i>                         |
| STP-inf-F | <i>emrA</i>                               |
| STP-inf-F | <i>aac(6')-30</i>                         |
| STP-inf-F | <i>yojI</i>                               |
| STP-inf-F | <i>Klebsiella_pneumoniae_OmpK37</i>       |
| STP-inf-F | <i>emrR</i>                               |
| STP-inf-F | <i>strB</i>                               |
| STP-inf-F | <i>cpxA</i>                               |
| STP-inf-F | <i>mdtC</i>                               |
| STP-inf-F | <i>aadA17</i>                             |
| STP-inf-F | <i>Nocardia_rifampin_resistant_beta-s</i> |
| STP-inf-F | <i>pmrF</i>                               |
| STP-inf-F | <i>emrY</i>                               |
| STP-inf-F | <i>catA9</i>                              |
| STP-inf-F | <i>mef(B)</i>                             |
| STP-inf-F | <i>blaOXA-464</i>                         |
| STP-inf-F | <i>mdtN</i>                               |
| STP-inf-F | <i>acrD</i>                               |
| STP-inf-F | <i>catP</i>                               |
| STP-inf-F | <i>blaOXA-5</i>                           |
| STP-inf-F | <i>aph7</i>                               |
| STP-inf-F | <i>aadA10</i>                             |
| STP-inf-F | <i>qnrS2</i>                              |
| STP-inf-F | <i>mdtG</i>                               |
| STP-inf-F | <i>Penicillin_Binding_Protein_Ecoli</i>   |
| STP-inf-F | <i>mphB</i>                               |
| STP-inf-F | <i>eptA</i>                               |
| STP-inf-F | <i>ugd</i>                                |
| STP-inf-F | <i>aadA24</i>                             |
| STP-inf-F | <i>nimD_Nitroimidazole_Gene</i>           |
| STP-inf-F | <i>blaAIM-1</i>                           |
| STP-inf-F | <i>bacA</i>                               |
| STP-inf-F | <i>MexF</i>                               |
| STP-inf-F | <i>baeR</i>                               |
| STP-inf-F | <i>blaOXA-2</i>                           |
| STP-inf-F | <i>mdtA</i>                               |
| STP-inf-F | <i>blaMOX-9</i>                           |
| STP-inf-F | <i>emrK</i>                               |
| STP-inf-F | <i>nimA_Nitroimidazole_Gene</i>           |
| STP-inf-F | <i>erm(X)</i>                             |
| STP-inf-F | <i>OqxA</i>                               |
| STP-inf-F | <i>ant3''Ih-Aac6-IId</i>                  |
| STP-inf-F | <i>ant6-Ib</i>                            |

|           |                                            |
|-----------|--------------------------------------------|
| STP-inf-F | <i>aac3-Ile</i>                            |
| STP-inf-F | <i>mdtH</i>                                |
| STP-inf-F | <i>catQ</i>                                |
| STP-inf-F | <i>blaRCP</i>                              |
| STP-inf-F | <i>aadA13</i>                              |
| STP-inf-F | <i>RbpA</i>                                |
| STP-inf-F | <i>aciI</i>                                |
| STP-inf-F | <i>evgA</i>                                |
| STP-inf-F | <i>aac3-Ib-Aac6-Ib</i>                     |
| STP-inf-F | <i>OqxBgb</i>                              |
| STP-inf-F | <i>cepA</i>                                |
| STP-inf-F | <i>erm(Q)</i>                              |
| STP-inf-F | <i>mph(A)</i>                              |
| STP-inf-F | <i>ant(3'')-IIc</i>                        |
| STP-inf-F | <i>acrS</i>                                |
| STP-inf-F | <i>tet(E)</i>                              |
| STP-inf-F | <i>blaOXA-209</i>                          |
| STP-inf-F | <i>blaOXA-281</i>                          |
| STP-inf-F | <i>fosA_gen</i>                            |
| STP-inf-F | <i>FosA5</i>                               |
| STP-inf-F | <i>vanW-G</i>                              |
| STP-inf-F | <i>AmpC1_Ecoli</i>                         |
| STP-inf-F | <i>gadW</i>                                |
| STP-inf-F | <i>floR</i>                                |
| STP-inf-F | <i>aac(3)-Ia</i>                           |
| STP-inf-F | <i>catB3</i>                               |
| STP-inf-F | <i>aadA12</i>                              |
| STP-inf-F | <i>iri</i>                                 |
| STP-inf-F | <i>blaEC</i>                               |
| STP-inf-F | <i>blaOXA-643</i>                          |
| STP-inf-F | <i>blaOXA-650</i>                          |
| STP-inf-F | <i>aad(6)</i>                              |
| STP-inf-F | <i>Escherichia_coli_emrE</i>               |
| STP-inf-F | <i>nimE_Nitroimidazole_Gene</i>            |
| STP-inf-F | <i>aac3-Ib</i>                             |
| STP-inf-F | <i>ant(2'')-Ia</i>                         |
| STP-inf-F | <i>aph(2'')-IIa</i>                        |
| STP-inf-F | <i>mcr-3.6</i>                             |
| STP-inf-F | <i>Klebsiella_pneumoniae_KpnE</i>          |
| STP-inf-F | <i>erm(T)</i>                              |
| STP-inf-F | <i>aac(6')-Ib-G</i>                        |
| STP-inf-F | <i>erm(47)</i>                             |
| STP-inf-F | <i>marA</i>                                |
| STP-inf-F | <i>AAC(6')-30/AAC(6')-Ib'_fusion_prote</i> |

|           |                                    |
|-----------|------------------------------------|
| STP-inf-F | <i>blaRSC1-1</i>                   |
| STP-inf-F | <i>blaOXA-725</i>                  |
| STP-inf-F | <i>lmrD</i>                        |
| STP-inf-F | <i>blaOXA-101</i>                  |
| STP-inf-F | <i>blaOXA-37</i>                   |
| STP-inf-F | <i>lnu(B)</i>                      |
| STP-inf-F | <i>vanX-A</i>                      |
| STP-inf-F | <i>blaOXA-212</i>                  |
| STP-inf-F | <i>blaOXA-662</i>                  |
| STP-inf-F | <i>ere(B)</i>                      |
| STP-inf-F | <i>FosA6</i>                       |
| STP-inf-F | <i>str</i>                         |
| STP-inf-F | <i>blaBEL-1</i>                    |
| STP-inf-F | <i>tet(36)</i>                     |
| STP-inf-F | <i>qnrB19</i>                      |
| STP-inf-F | <i>aacA-ACII</i>                   |
| STP-inf-F | <i>blaPAU-1</i>                    |
| STP-inf-F | <i>CARB-10</i>                     |
| STP-inf-F | <i>Pseudomonas_aeruginosa_CpxR</i> |
| STP-inf-F | <i>blaEC-19</i>                    |
| STP-inf-F | <i>mcr-3.1</i>                     |
| STP-inf-F | <i>oqxA10</i>                      |
| STP-inf-F | <i>vanT-G</i>                      |
| STP-inf-F | <i>vanZ-A</i>                      |
| STP-inf-F | <i>erm(A)</i>                      |
| STP-inf-F | <i>tetB(46)</i>                    |
| STP-inf-F | <i>nimj_Nitroimidazole_Gene</i>    |
| STP-inf-F | <i>aph(3')-VI</i>                  |
| STP-inf-F | <i>cfr(B)</i>                      |
| STP-inf-F | <i>sat-2A</i>                      |
| STP-inf-F | <i>vanG2</i>                       |
| STP-inf-F | <i>oqxB11</i>                      |
| STP-inf-F | <i>blaOXA-780</i>                  |
| STP-inf-F | <i>aadB</i>                        |
| STP-inf-F | <i>lnu(F)</i>                      |
| STP-inf-F | <i>blaOXA-224</i>                  |
| STP-inf-F | <i>aacA38</i>                      |
| STP-inf-F | <i>tet(T)</i>                      |
| STP-inf-F | <i>mexK</i>                        |
| STP-inf-F | <i>aadA16</i>                      |
| STP-inf-F | <i>blaEC-5</i>                     |
| STP-inf-F | <i>aac(3)-IIe</i>                  |
| STP-inf-F | <i>aac3-IIId</i>                   |
| STP-inf-F | <i>blaSHV-1</i>                    |

|           |                                   |
|-----------|-----------------------------------|
| STP-inf-F | <i>blaGES-10</i>                  |
| STP-inf-F | <i>cepA_beta-lactamase</i>        |
| STP-inf-F | <i>vanY-A</i>                     |
| STP-inf-F | <i>tet(33)</i>                    |
| STP-inf-F | <i>ere(A2)</i>                    |
| STP-inf-F | <i>tetA(P)</i>                    |
| STP-inf-F | <i>mcr-3.17</i>                   |
| STP-inf-F | <i>mcr-5.1</i>                    |
| STP-inf-F | <i>Klebsiella_pneumoniae_KpnF</i> |
| STP-inf-F | <i>kdpE</i>                       |
| STP-inf-F | <i>mtrA</i>                       |
| STP-inf-F | <i>vanR-D</i>                     |
| STP-inf-F | <i>vanS-D</i>                     |
| STP-inf-F | <i>mexW</i>                       |
| STP-inf-F | <i>cepH-A3</i>                    |
| STP-inf-F | <i>cphA2</i>                      |
| STP-inf-F | <i>vanXY-G</i>                    |
| STP-inf-F | <i>blaOXA-33</i>                  |
| STP-inf-F | <i>tet(Z)</i>                     |
| STP-inf-F | <i>smeE</i>                       |
| STP-inf-F | <i>tetB-P</i>                     |
| STP-inf-F | <i>oqxB10</i>                     |
| STP-inf-F | <i>aadA25</i>                     |
| STP-inf-F | <i>blaOXA-504</i>                 |
| STP-inf-F | <i>blaOXA-726</i>                 |
| STP-inf-F | <i>blaOXA-142</i>                 |
| STP-inf-F | <i>erm(35)</i>                    |
| STP-inf-F | <i>blaOXA-309</i>                 |
| STP-inf-F | <i>blaOXA-373</i>                 |
| STP-inf-F | <i>blaOXA-652</i>                 |
| STP-inf-F | <i>blaOXA-9</i>                   |
| STP-inf-F | <i>blaOXA-15</i>                  |
| STP-inf-F | <i>blaOXA-18</i>                  |
| STP-inf-F | <i>vanW-B</i>                     |
| STP-inf-F | <i>aadA1-pm</i>                   |
| STP-inf-F | <i>blaOXA-675</i>                 |
| STP-inf-F | <i>FosB6</i>                      |
| STP-inf-F | <i>tetA-P</i>                     |
| STP-inf-F | <i>blaSHV-179</i>                 |
| STP-inf-F | <i>blaTEM-93</i>                  |
| STP-inf-F | <i>blaTEM-1</i>                   |
| STP-inf-F | <i>tetA(46)</i>                   |
| STP-inf-F | <i>blaL1</i>                      |
| STP-inf-F | <i>blaOXY2-1</i>                  |

|           |                                  |
|-----------|----------------------------------|
| STP-inf-F | <i>aac6-Ik</i>                   |
| STP-inf-F | <i>aacA34</i>                    |
| STP-inf-F | <i>blaLRA-1</i>                  |
| STP-inf-F | <i>aph(2'')-If</i>               |
| STP-inf-F | <i>CARB-14/blaRTG</i>            |
| STP-inf-F | <i>blaVEB-1</i>                  |
| STP-inf-F | <i>blaVEB-1a</i>                 |
| STP-inf-F | <i>oqxB15</i>                    |
| STP-inf-F | <i>blaPER-7</i>                  |
| STP-inf-F | <i>dfrA14</i>                    |
| STP-inf-F | <i>eat(A)</i>                    |
| STP-inf-F | <i>MuxB</i>                      |
| STP-inf-F | <i>oqxB12</i>                    |
| STP-inf-F | <i>oqxB19</i>                    |
| STP-inf-F | <i>adeJ</i>                      |
| STP-inf-F | <i>aac3-I</i>                    |
| STP-inf-F | <i>vanY-D</i>                    |
| STP-inf-F | <i>aac(6')-Im</i>                |
| STP-inf-F | <i>aac6-Im</i>                   |
| STP-inf-F | <i>mcr-4.1</i>                   |
| STP-inf-F | <i>sat3</i>                      |
| STP-inf-F | <i>aac(6')-Iid</i>               |
| STP-inf-F | <i>catB4</i>                     |
| STP-inf-F | <i>aac(6')-Iaj</i>               |
| STP-inf-F | <i>blaACT-1</i>                  |
| STP-inf-F | <i>vanXY-c4</i>                  |
| STP-inf-F | <i>blaMOX-2</i>                  |
| STP-inf-F | <i>blaMOX-12</i>                 |
| STP-inf-F | <i>blaMOX-6</i>                  |
| STP-inf-F | <i>mexP</i>                      |
| STP-inf-F | <i>aac6-IIc</i>                  |
| STP-inf-F | <i>blaLHK-1</i>                  |
| STP-inf-F | <i>Salmonella_enterica_cmlA</i>  |
| STP-inf-F | <i>cmr</i>                       |
| STP-inf-F | <i>dfrA36</i>                    |
| STP-inf-F | <i>oqxA11</i>                    |
| STP-inf-F | <i>tet(Y)</i>                    |
| STP-inf-F | <i>smeD</i>                      |
| STP-inf-F | <i>Enterobacter_cloacae_acrA</i> |
| STP-inf-F | <i>vanX-B</i>                    |
| STP-inf-F | <i>vanX-D</i>                    |
| STP-inf-F | <i>ere(A)</i>                    |
| STP-inf-F | <i>cmlA5</i>                     |
| STP-inf-F | <i>smeB</i>                      |

|           |                     |
|-----------|---------------------|
| STP-inf-F | <i>oqxB14</i>       |
| STP-inf-F | <i>catB6</i>        |
| STP-inf-F | <i>catB8</i>        |
| STP-inf-F | <i>fusF</i>         |
| STP-inf-F | <i>catA16</i>       |
| STP-inf-F | <i>vanS-B</i>       |
| STP-inf-F | <i>tet(L)</i>       |
| STP-inf-F | <i>Mbl</i>          |
| STP-inf-F | <i>vanR-A</i>       |
| STP-inf-F | <i>blaSHN-1</i>     |
| STP-inf-F | <i>basS</i>         |
| STP-inf-F | <i>adeK</i>         |
| STP-inf-F | <i>msr(A)</i>       |
| STP-inf-F | <i>lsa(C)</i>       |
| STP-inf-F | <i>nd</i>           |
| STP-inf-F | <i>blaSIM-1</i>     |
| STP-inf-F | <i>blaOXA-448</i>   |
| STP-inf-F | <i>aph3-VIIa</i>    |
| STP-inf-F | <i>cphA1</i>        |
| STP-inf-F | <i>imiH</i>         |
| STP-inf-F | <i>opcM</i>         |
| STP-inf-F | <i>mexI</i>         |
| STP-inf-F | <i>armA</i>         |
| STP-inf-F | <i>blaRSD2-1</i>    |
| STP-inf-F | <i>blaNPS-1</i>     |
| STP-inf-F | <i>MexB</i>         |
| STP-inf-F | <i>oqxB17</i>       |
| STP-inf-F | <i>oqxB7</i>        |
| STP-inf-F | <i>blaOXA-198</i>   |
| STP-inf-F | <i>ant(3'')-IIb</i> |
| STP-inf-F | <i>adeF</i>         |
| STP-inf-F | <i>aphA15</i>       |
| STP-inf-F | <i>blaOXA-12</i>    |
| STP-inf-F | <i>blaOXA-724</i>   |
| STP-inf-F | <i>aadA7</i>        |
| STP-inf-F | <i>blaOXA-13</i>    |
| STP-inf-F | <i>blaOXA-46</i>    |
| STP-inf-F | <i>blaOXA-732</i>   |
| STP-inf-F | <i>blaOXA-836</i>   |
| STP-inf-F | <i>vanY-B</i>       |
| STP-inf-F | <i>mcr-10.1</i>     |
| STP-inf-F | <i>mcr-3.10</i>     |
| STP-inf-F | <i>aph(3'')-Ia</i>  |
| STP-inf-F | <i>blaOXA-444</i>   |

|           |                    |
|-----------|--------------------|
| STP-inf-F | <i>aphEII</i>      |
| STP-inf-F | <i>blaOXA-334</i>  |
| STP-inf-F | <i>srm(B)</i>      |
| STP-inf-F | <i>blaOXA-160</i>  |
| STP-inf-F | <i>blaOXA-3</i>    |
| STP-inf-F | <i>blaOXA-737</i>  |
| STP-inf-F | <i>blaOXA-228</i>  |
| STP-inf-F | <i>blaOXA-320</i>  |
| STP-inf-F | <i>blaOXA-299</i>  |
| STP-inf-F | <i>blaLEN-1</i>    |
| STP-inf-F | <i>aac3-IXa</i>    |
| STP-inf-F | <i>blaTER-1</i>    |
| STP-inf-F | <i>aac3-IIa</i>    |
| STP-inf-F | <i>blaGIL-1</i>    |
| STP-inf-F | <i>blaOKP-A-12</i> |
| STP-inf-F | <i>blaOKP-A-16</i> |
| STP-inf-F | <i>blaOKP-D-1</i>  |
| STP-inf-F | <i>blaSHV-102</i>  |
| STP-inf-F | <i>blaSHV-107</i>  |
| STP-inf-F | <i>blaSHV-35</i>   |
| STP-inf-F | <i>blaSHV-63</i>   |
| STP-inf-F | <i>blaTEM-102</i>  |
| STP-inf-F | <i>blaTEM-156</i>  |
| STP-inf-F | <i>blaGES-1</i>    |
| STP-inf-F | <i>blaGES-13</i>   |
| STP-inf-F | <i>blaCRH-1</i>    |
| STP-inf-F | <i>blaCTX-M-74</i> |
| STP-inf-F | <i>blaGOB-27</i>   |
| STP-inf-F | <i>blaCTX-M-12</i> |
| STP-inf-F | <i>blaORN1a</i>    |
| STP-inf-F | <i>blaOXY1-1</i>   |
| STP-inf-F | <i>blaOXY1-2</i>   |
| STP-inf-F | <i>blaPLA1a</i>    |
| STP-inf-F | <i>blaSFO-1</i>    |
| STP-inf-F | <i>blaBES-1</i>    |
| STP-inf-F | <i>blaERP-1</i>    |
| STP-inf-F | <i>vanYF-Pp</i>    |
| STP-inf-F | <i>patB</i>        |
| STP-inf-F | <i>aadA9</i>       |
| STP-inf-F | <i>aph(2'')-Id</i> |
| STP-inf-F | <i>blaRm3</i>      |
| STP-inf-F | <i>blaL2</i>       |
| STP-inf-F | <i>CARB-3</i>      |
| STP-inf-F | <i>blaM-1</i>      |

|           |                                           |
|-----------|-------------------------------------------|
| STP-inf-F | <i>blaPER-1</i>                           |
| STP-inf-F | <i>penA-A_Burk</i>                        |
| STP-inf-F | <i>blaBKC-1</i>                           |
| STP-inf-F | <i>erm(S)</i>                             |
| STP-inf-F | <i>otr(A)</i>                             |
| STP-inf-F | <i>cfxA4</i>                              |
| STP-inf-F | <i>cfxA5</i>                              |
| STP-inf-F | <i>erm(31)</i>                            |
| STP-inf-F | <i>vanH-A</i>                             |
| STP-inf-F | <i>vanH-B</i>                             |
| STP-inf-F | <i>blaDES-1</i>                           |
| STP-inf-F | <i>blaSGM-6</i>                           |
| STP-inf-F | <i>vanJ</i>                               |
| STP-inf-F | <i>MSI-1</i>                              |
| STP-inf-F | <i>vanB</i>                               |
| STP-inf-F | <i>vanD</i>                               |
| STP-inf-F | <i>vanSO</i>                              |
| STP-inf-F | <i>AxyY</i>                               |
| STP-inf-F | <i>oqxB8</i>                              |
| STP-inf-F | <i>Streptomyces_rishiriensis_parY_mut</i> |
| STP-inf-F | <i>vanE</i>                               |
| STP-inf-F | <i>TriB</i>                               |
| STP-inf-F | <i>efrB</i>                               |
| STP-inf-F | <i>mexH</i>                               |
| STP-inf-F | <i>pp-flo</i>                             |
| STP-inf-F | <i>mexV</i>                               |
| STP-inf-F | <i>blaEC-13</i>                           |
| STP-inf-F | <i>blaEC-18</i>                           |
| STP-inf-F | <i>blaDHA-16</i>                          |
| STP-inf-F | <i>blaACT-15</i>                          |
| STP-inf-F | <i>blaCMY-103</i>                         |
| STP-inf-F | <i>blaCMY-FOX</i>                         |
| STP-inf-F | <i>blaFOX-1</i>                           |
| STP-inf-F | <i>blaFOX-13</i>                          |
| STP-inf-F | <i>blaMOX-3</i>                           |
| STP-inf-F | <i>blaADC-120</i>                         |
| STP-inf-F | <i>blaADC-208</i>                         |
| STP-inf-F | <i>blaMOX-13</i>                          |
| STP-inf-F | <i>blaMOX-8</i>                           |
| STP-inf-F | <i>MexA</i>                               |
| STP-inf-F | <i>oqxA3</i>                              |
| STP-inf-F | <i>oqxA7</i>                              |
| STP-inf-F | <i>beta-lactamase_class-C</i>             |
| STP-inf-F | <i>blaPDC-122</i>                         |



|           |                   |
|-----------|-------------------|
| STP-inf-F | <i>blaPDC-125</i> |
| STP-inf-F | <i>blaPDC-148</i> |
| STP-inf-F | <i>blaPDC-275</i> |
| STP-inf-F | <i>vanK-Sc</i>    |
| STP-inf-F | <i>smeA</i>       |
| STP-inf-F | <i>tet(B)</i>     |
| STP-inf-F | <i>MexE</i>       |
| STP-inf-F | <i>mgt</i>        |
| STP-inf-F | <i>cmlA</i>       |
| STP-inf-F | <i>cmlA1</i>      |
| STP-inf-F | <i>efmA</i>       |
| STP-inf-F | <i>tet(42)</i>    |
| STP-inf-F | <i>abeM</i>       |
| STP-inf-F | <i>mepA</i>       |
| STP-inf-F | <i>smeF</i>       |
| STP-inf-F | <i>smeS</i>       |
| STP-inf-F | <i>cmeC</i>       |
| STP-inf-F | <i>lsa(A)</i>     |
| STP-inf-F | <i>lrfA</i>       |
| STP-inf-F | <i>tva(A)</i>     |
| STP-inf-F | <i>TriC</i>       |
| STP-inf-F | <i>qepA2</i>      |
| STP-inf-F | <i>tcr-3</i>      |
| STP-inf-F | <i>mexN</i>       |
| STP-inf-F | <i>vga(A)</i>     |
| STP-inf-F | <i>vga(C)</i>     |
| STP-inf-F | <i>mexY</i>       |
| STP-inf-F | <i>vga(E)</i>     |
| STP-inf-F | <i>oqxB16</i>     |
| STP-inf-F | <i>oqxB18</i>     |
| STP-inf-F | <i>oqxB22</i>     |
| STP-inf-F | <i>oqxB24</i>     |
| STP-inf-F | <i>efpA</i>       |
| STP-inf-F | <i>tcmA</i>       |
| STP-inf-F | <i>mcr-9.1</i>    |
| STP-inf-F | <i>mcr-3.3</i>    |
| STP-inf-F | <i>mcr-3.12</i>   |
| STP-inf-F | <i>mcr-3.23</i>   |
| STP-inf-F | <i>tlr(C)</i>     |
| STP-inf-F | <i>car(A)</i>     |
| STP-inf-F | <i>patA</i>       |
| STP-inf-F | <i>mcr-8.1</i>    |
| STP-inf-F | <i>efrA</i>       |
| STP-inf-F | <i>macB</i>       |

|           |                    |
|-----------|--------------------|
| STP-inf-F | <i>arnA</i>        |
| STP-inf-F | <i>mecC</i>        |
| STP-inf-F | <i>mecA2</i>       |
| STP-inf-F | <i>mecB</i>        |
| STP-inf-F | <i>PBP1b</i>       |
| STP-inf-F | <i>MexD</i>        |
| STP-inf-F | <i>oqxB20</i>      |
| STP-inf-F | <i>oqxB21</i>      |
| STP-inf-F | <i>oqxB26</i>      |
| STP-inf-F | <i>mtrD</i>        |
| STP-inf-A | <i>msr(E)</i>      |
| STP-inf-A | <i>mph(E)</i>      |
| STP-inf-A | <i>tet(39)</i>     |
| STP-inf-A | <i>erm(B)</i>      |
| STP-inf-A | <i>tet(Q)</i>      |
| STP-inf-A | <i>tet(W)</i>      |
| STP-inf-A | <i>tet(O)</i>      |
| STP-inf-A | <i>blaMCA</i>      |
| STP-inf-A | <i>mef(A)</i>      |
| STP-inf-A | <i>aadA27</i>      |
| STP-inf-A | <i>msr(D)</i>      |
| STP-inf-A | <i>aph(3'')-Ib</i> |
| STP-inf-A | <i>blaOXA-296</i>  |
| STP-inf-A | <i>aph(6)-Id</i>   |
| STP-inf-A | <i>qacH</i>        |
| STP-inf-A | <i>tet(M)</i>      |
| STP-inf-A | <i>erm(F)</i>      |
| STP-inf-A | <i>cfxA6</i>       |
| STP-inf-A | <i>blaOXA-333</i>  |
| STP-inf-A | <i>aadE</i>        |
| STP-inf-A | <i>blaOXA-164</i>  |
| STP-inf-A | <i>mef(C)</i>      |
| STP-inf-A | <i>cfxA</i>        |
| STP-inf-A | <i>blaOXA-211</i>  |
| STP-inf-A | <i>sull</i>        |
| STP-inf-A | <i>dfrF</i>        |
| STP-inf-A | <i>tet(40)</i>     |
| STP-inf-A | <i>aac(3)-I</i>    |
| STP-inf-A | <i>blaOXA-129</i>  |
| STP-inf-A | <i>lsa(E)</i>      |
| STP-inf-A | <i>Mef(En2)</i>    |
| STP-inf-A | <i>cmxA</i>        |
| STP-inf-A | <i>tet(32)</i>     |
| STP-inf-A | <i>cfr-Cb</i>      |

|           |                                             |
|-----------|---------------------------------------------|
| STP-inf-A | <i>blaAER-1</i>                             |
| STP-inf-A | <i>tet(X)</i>                               |
| STP-inf-A | <i>aadS</i>                                 |
| STP-inf-A | <i>vanA-G</i>                               |
| STP-inf-A | <i>mph(G)</i>                               |
| STP-inf-A | <i>tet(A)</i>                               |
| STP-inf-A | <i>blaOXA-141</i>                           |
| STP-inf-A | <i>blaOXA-280</i>                           |
| STP-inf-A | <i>aadA5</i>                                |
| STP-inf-A | <i>sul2</i>                                 |
| STP-inf-A | <i>lmu(AN2)</i>                             |
| STP-inf-A | <i>tet(C)</i>                               |
| STP-inf-A | <i>lin(B)</i>                               |
| STP-inf-A | <i>AAC(6')-IIa</i>                          |
| STP-inf-A | <i>erm(G)</i>                               |
| STP-inf-A | <i>tet(R)</i>                               |
| STP-inf-A | <i>ere(D)</i>                               |
| STP-inf-A | <i>tetR(G)</i>                              |
| STP-inf-A | <i>tet(S)</i>                               |
| STP-inf-A | <i>Bifidobacteria_intrinsic_ileS_confer</i> |
| STP-inf-A | <i>lmu(C)</i>                               |
| STP-inf-A | <i>blaOXA-666</i>                           |
| STP-inf-A | <i>blaOXA-10</i>                            |
| STP-inf-A | <i>catA9</i>                                |
| STP-inf-A | <i>CblA-1</i>                               |
| STP-inf-A | <i>aph(3'')-III</i>                         |
| STP-inf-A | <i>aac3-IIe</i>                             |
| STP-inf-A | <i>tet(G)</i>                               |
| STP-inf-A | <i>blaOXA-392</i>                           |
| STP-inf-A | <i>aac6-Aph2</i>                            |
| STP-inf-A | <i>aadA1</i>                                |
| STP-inf-A | <i>catA13</i>                               |
| STP-inf-A | <i>blaOXA-427</i>                           |
| STP-inf-A | <i>lmu(G)</i>                               |
| STP-inf-A | <i>blaOXA-643</i>                           |
| STP-inf-A | <i>cat-TC</i>                               |
| STP-inf-A | <i>aadA6</i>                                |
| STP-inf-A | <i>blaOXA-118</i>                           |
| STP-inf-A | <i>catQ</i>                                 |
| STP-inf-A | <i>blaOXA-650</i>                           |
| STP-inf-A | <i>ICR-Mo</i>                               |
| STP-inf-A | <i>ant(3'')-IIc</i>                         |
| STP-inf-A | <i>blaMOX-9</i>                             |
| STP-inf-A | <i>blaRCP</i>                               |

|           |                                            |
|-----------|--------------------------------------------|
| STP-inf-A | <i>blaOXA-212</i>                          |
| STP-inf-A | <i>aadA11</i>                              |
| STP-inf-A | <i>blaPER-1</i>                            |
| STP-inf-A | <i>ant(3'')-IIa</i>                        |
| STP-inf-A | <i>spw</i>                                 |
| STP-inf-A | <i>bla-A</i>                               |
| STP-inf-A | <i>blaOXA-1</i>                            |
| STP-inf-A | <i>aad9</i>                                |
| STP-inf-A | <i>aadA13</i>                              |
| STP-inf-A | <i>aph3-VIb</i>                            |
| STP-inf-A | <i>AAC(6')-Ib7</i>                         |
| STP-inf-A | <i>blaOXA-20</i>                           |
| STP-inf-A | <i>lmu(B)</i>                              |
| STP-inf-A | <i>blaOXA-347</i>                          |
| STP-inf-A | <i>aac3-I</i>                              |
| STP-inf-A | <i>sat4</i>                                |
| STP-inf-A | <i>aadA2</i>                               |
| STP-inf-A | <i>iri</i>                                 |
| STP-inf-A | <i>erm(T)</i>                              |
| STP-inf-A | <i>qnrS2</i>                               |
| STP-inf-A | <i>blaOXA-662</i>                          |
| STP-inf-A | <i>blaOXA-139</i>                          |
| STP-inf-A | <i>tet(44)</i>                             |
| STP-inf-A | <i>strB</i>                                |
| STP-inf-A | <i>aac3-IIId</i>                           |
| STP-inf-A | <i>CARB-14/blaRTG</i>                      |
| STP-inf-A | <i>blaOXA-645</i>                          |
| STP-inf-A | <i>kdpE</i>                                |
| STP-inf-A | <i>Nocardia_rifampin_resistant_beta-s</i>  |
| STP-inf-A | <i>mdtP</i>                                |
| STP-inf-A | <i>catS</i>                                |
| STP-inf-A | <i>ant3''Ih-Aac6-IIId</i>                  |
| STP-inf-A | <i>blaOXA-119</i>                          |
| STP-inf-A | <i>floR2</i>                               |
| STP-inf-A | <i>vanY-A</i>                              |
| STP-inf-A | <i>evgA</i>                                |
| STP-inf-A | <i>blaOXA-334</i>                          |
| STP-inf-A | <i>blaOXA-373</i>                          |
| STP-inf-A | <i>cfr(C)</i>                              |
| STP-inf-A | <i>tetA(P)</i>                             |
| STP-inf-A | <i>CRP</i>                                 |
| STP-inf-A | <i>Escherichia_coli_acrA</i>               |
| STP-inf-A | <i>Klebsiella_pneumoniae_acrA</i>          |
| STP-inf-A | <i>AAC(6')-30/AAC(6')-Ib'_fusion_prote</i> |

|           |                                         |
|-----------|-----------------------------------------|
| STP-inf-A | <i>tet(E)</i>                           |
| STP-inf-A | <i>aadA17</i>                           |
| STP-inf-A | <i>mph(A)</i>                           |
| STP-inf-A | <i>mdtF</i>                             |
| STP-inf-A | <i>mdtE</i>                             |
| STP-inf-A | <i>aac(3)-Ia</i>                        |
| STP-inf-A | <i>blaOXA-281</i>                       |
| STP-inf-A | <i>Klebsiella_pneumoniae_KpnH</i>       |
| STP-inf-A | <i>dfrB3</i>                            |
| STP-inf-A | <i>aad(6)</i>                           |
| STP-inf-A | <i>acrF</i>                             |
| STP-inf-A | <i>cfxA_gen</i>                         |
| STP-inf-A | <i>acrB</i>                             |
| STP-inf-A | <i>gadW</i>                             |
| STP-inf-A | <i>mef(B)</i>                           |
| STP-inf-A | <i>cpxA</i>                             |
| STP-inf-A | <i>Penicillin_Binding_Protein_Ecoli</i> |
| STP-inf-A | <i>CARB-10</i>                          |
| STP-inf-A | <i>emrA</i>                             |
| STP-inf-A | <i>acrS</i>                             |
| STP-inf-A | <i>ant(2'')-Ia</i>                      |
| STP-inf-A | <i>mdtC</i>                             |
| STP-inf-A | <i>H-NS</i>                             |
| STP-inf-A | <i>aadA10</i>                           |
| STP-inf-A | <i>fosA_gen</i>                         |
| STP-inf-A | <i>blaTEM-1</i>                         |
| STP-inf-A | <i>aacA-ACII</i>                        |
| STP-inf-A | <i>mdtB</i>                             |
| STP-inf-A | <i>evgS</i>                             |
| STP-inf-A | <i>mdtH</i>                             |
| STP-inf-A | <i>MexF</i>                             |
| STP-inf-A | <i>floR</i>                             |
| STP-inf-A | <i>mdtG</i>                             |
| STP-inf-A | <i>erm(Q)</i>                           |
| STP-inf-A | <i>aadA24</i>                           |
| STP-inf-A | <i>mphB</i>                             |
| STP-inf-A | <i>blaOXA-205</i>                       |
| STP-inf-A | <i>lnu(A)</i>                           |
| STP-inf-A | <i>vanZ-A</i>                           |
| STP-inf-A | <i>eptA</i>                             |
| STP-inf-A | <i>blaOXA-209</i>                       |
| STP-inf-A | <i>blaOXA-309</i>                       |
| STP-inf-A | <i>blaOXA-652</i>                       |
| STP-inf-A | <i>gadX</i>                             |

|           |                                    |
|-----------|------------------------------------|
| STP-inf-A | <i>blaOXA-18</i>                   |
| STP-inf-A | <i>ampH</i>                        |
| STP-inf-A | <i>Escherichia_coli_emrE</i>       |
| STP-inf-A | <i>ugd</i>                         |
| STP-inf-A | <i>erm(X)</i>                      |
| STP-inf-A | <i>ant6-Ib</i>                     |
| STP-inf-A | <i>aac(3)-IIe</i>                  |
| STP-inf-A | <i>ere(A2)</i>                     |
| STP-inf-A | <i>emrK</i>                        |
| STP-inf-A | <i>tet(T)</i>                      |
| STP-inf-A | <i>tetB-P</i>                      |
| STP-inf-A | <i>cblA</i>                        |
| STP-inf-A | <i>aac(6')-Im</i>                  |
| STP-inf-A | <i>tetA-P</i>                      |
| STP-inf-A | <i>baeR</i>                        |
| STP-inf-A | <i>Salmonella_enterica_cmlA</i>    |
| STP-inf-A | <i>blaOXA-5</i>                    |
| STP-inf-A | <i>blaOXA-836</i>                  |
| STP-inf-A | <i>mcr-3.1</i>                     |
| STP-inf-A | <i>Escherichia_coli_mdfA</i>       |
| STP-inf-A | <i>mdtM</i>                        |
| STP-inf-A | <i>mdtN</i>                        |
| STP-inf-A | <i>catP</i>                        |
| STP-inf-A | <i>mdtA</i>                        |
| STP-inf-A | <i>catB3</i>                       |
| STP-inf-A | <i>tolC</i>                        |
| STP-inf-A | <i>emrY</i>                        |
| STP-inf-A | <i>aac(6')-30</i>                  |
| STP-inf-A | <i>lmrD</i>                        |
| STP-inf-A | <i>Pseudomonas_aeruginosa_CpxR</i> |
| STP-inf-A | <i>ampH_Ecoli</i>                  |
| STP-inf-A | <i>mcr-3.6</i>                     |
| STP-inf-A | <i>baeS</i>                        |
| STP-inf-A | <i>Klebsiella_pneumoniae_KpnG</i>  |
| STP-inf-A | <i>dfrB1</i>                       |
| STP-inf-A | <i>dhfr7</i>                       |
| STP-inf-A | <i>tet(36)</i>                     |
| STP-inf-A | <i>pmrF</i>                        |
| STP-inf-A | <i>erm(A)</i>                      |
| STP-inf-A | <i>tetA(46)</i>                    |
| STP-inf-A | <i>erm(47)</i>                     |
| STP-inf-A | <i>msbA</i>                        |
| STP-inf-A | <i>cphA5</i>                       |
| STP-inf-A | <i>nimE_Nitroimidazole_Gene</i>    |

|           |                                     |
|-----------|-------------------------------------|
| STP-inf-A | <i>blaNPS-1</i>                     |
| STP-inf-A | <i>aac3-Ib</i>                      |
| STP-inf-A | <i>yojI</i>                         |
| STP-inf-A | <i>blaOXA-9</i>                     |
| STP-inf-A | <i>vanW-G</i>                       |
| STP-inf-A | <i>str</i>                          |
| STP-inf-A | <i>acrD</i>                         |
| STP-inf-A | <i>blaOXYI-1</i>                    |
| STP-inf-A | <i>blaPAU-1</i>                     |
| STP-inf-A | <i>cmr</i>                          |
| STP-inf-A | <i>oqxA10</i>                       |
| STP-inf-A | <i>oqxA11</i>                       |
| STP-inf-A | <i>cepA</i>                         |
| STP-inf-A | <i>vanT-G</i>                       |
| STP-inf-A | <i>aph7</i>                         |
| STP-inf-A | <i>vanH-B</i>                       |
| STP-inf-A | <i>mcr-3.17</i>                     |
| STP-inf-A | <i>qnrVC4</i>                       |
| STP-inf-A | <i>Klebsiella_pneumoniae_KpnF</i>   |
| STP-inf-A | <i>aac3-Ib-Aac6-Ib</i>              |
| STP-inf-A | <i>vanS-B</i>                       |
| STP-inf-A | <i>vanB</i>                         |
| STP-inf-A | <i>tet(L)</i>                       |
| STP-inf-A | <i>Klebsiella_pneumoniae_OmpK37</i> |
| STP-inf-A | <i>blaEC</i>                        |
| STP-inf-A | <i>blaOXA-464</i>                   |
| STP-inf-A | <i>marA</i>                         |
| STP-inf-A | <i>vanS-A</i>                       |
| STP-inf-A | <i>acrE</i>                         |
| STP-inf-A | <i>aph(3')-VIa</i>                  |
| STP-inf-A | <i>smeE</i>                         |
| STP-inf-A | <i>aadA25</i>                       |
| STP-inf-A | <i>beta-lactamase_class-C</i>       |
| STP-inf-A | <i>blaOXA-12</i>                    |
| STP-inf-A | <i>blaOXA-504</i>                   |
| STP-inf-A | <i>blaOXA-725</i>                   |
| STP-inf-A | <i>blaOXA-726</i>                   |
| STP-inf-A | <i>blaOXA-13</i>                    |
| STP-inf-A | <i>blaOXA-46</i>                    |
| STP-inf-A | <i>aph(3')-IIc</i>                  |
| STP-inf-A | <i>bacA</i>                         |
| STP-inf-A | <i>blaOXA-644</i>                   |
| STP-inf-A | <i>arr-269927220</i>                |
| STP-inf-A | <i>blaOXA-2</i>                     |

|           |                                 |
|-----------|---------------------------------|
| STP-inf-A | <i>MexE</i>                     |
| STP-inf-A | <i>FosA</i>                     |
| STP-inf-A | <i>blaOXA-512</i>               |
| STP-inf-A | <i>FosA2</i>                    |
| STP-inf-A | <i>blaGES-1</i>                 |
| STP-inf-A | <i>blaOXY1-4</i>                |
| STP-inf-A | <i>aph(2'')-IIa</i>             |
| STP-inf-A | <i>blaVEB-3</i>                 |
| STP-inf-A | <i>arr</i>                      |
| STP-inf-A | <i>arr-8</i>                    |
| STP-inf-A | <i>arr2</i>                     |
| STP-inf-A | <i>dfrA1</i>                    |
| STP-inf-A | <i>cfxA3</i>                    |
| STP-inf-A | <i>dfrA14</i>                   |
| STP-inf-A | <i>vanH-A</i>                   |
| STP-inf-A | <i>vanH-D</i>                   |
| STP-inf-A | <i>nimD_Nitroimidazole_Gene</i> |
| STP-inf-A | <i>dfrG</i>                     |
| STP-inf-A | <i>aph4-Ia</i>                  |
| STP-inf-A | <i>mdtO</i>                     |
| STP-inf-A | <i>AxyY</i>                     |
| STP-inf-A | <i>MexB</i>                     |
| STP-inf-A | <i>cfr(B)</i>                   |
| STP-inf-A | <i>vanG</i>                     |
| STP-inf-A | <i>oqxB11</i>                   |
| STP-inf-A | <i>nimA_Nitroimidazole_Gene</i> |
| STP-inf-A | <i>aadB</i>                     |
| STP-inf-A | <i>mcr-9.1</i>                  |
| STP-inf-A | <i>mcr-3.3</i>                  |
| STP-inf-A | <i>mcr-5.1</i>                  |
| STP-inf-A | <i>aacA-ENT1</i>                |
| STP-inf-A | <i>catB4</i>                    |
| STP-inf-A | <i>aac(6')-Ib-AKT</i>           |
| STP-inf-A | <i>satA_Ba</i>                  |
| STP-inf-A | <i>dfr24</i>                    |
| STP-inf-A | <i>blaEC-18</i>                 |
| STP-inf-A | <i>tet(Z)</i>                   |
| STP-inf-A | <i>tet(Y)</i>                   |
| STP-inf-A | <i>patB</i>                     |
| STP-inf-A | <i>blaRSC1-1</i>                |
| STP-inf-A | <i>tet(B)</i>                   |
| STP-inf-A | <i>mexW</i>                     |
| STP-inf-A | <i>vanX-D</i>                   |
| STP-inf-A | <i>cmlA</i>                     |



|           |                   |
|-----------|-------------------|
| STP-inf-A | <i>cmlA1</i>      |
| STP-inf-A | <i>OqxBgb</i>     |
| STP-inf-A | <i>cmlB1</i>      |
| STP-inf-A | <i>MuxA</i>       |
| STP-inf-A | <i>tet(42)</i>    |
| STP-inf-A | <i>qnrB19</i>     |
| STP-inf-A | <i>catA16</i>     |
| STP-inf-A | <i>catB</i>       |
| STP-inf-A | <i>mtrA</i>       |
| STP-inf-A | <i>Mbl</i>        |
| STP-inf-A | <i>vanR-A</i>     |
| STP-inf-A | <i>oprA</i>       |
| STP-inf-A | <i>smeS</i>       |
| STP-inf-A | <i>blaEBR-2</i>   |
| STP-inf-A | <i>blaEBR-3</i>   |
| STP-inf-A | <i>blaIND-11</i>  |
| STP-inf-A | <i>erm(48)</i>    |
| STP-inf-A | <i>blaZOG-1</i>   |
| STP-inf-A | <i>TriC</i>       |
| STP-inf-A | <i>cphA2</i>      |
| STP-inf-A | <i>cphA6</i>      |
| STP-inf-A | <i>imiH</i>       |
| STP-inf-A | <i>vanXY-G</i>    |
| STP-inf-A | <i>imiS</i>       |
| STP-inf-A | <i>aph(3')-VI</i> |
| STP-inf-A | <i>blaLCR-1</i>   |
| STP-inf-A | <i>vga(A)</i>     |
| STP-inf-A | <i>aadA4</i>      |
| STP-inf-A | <i>aadA7</i>      |
| STP-inf-A | <i>blaOXA-101</i> |
| STP-inf-A | <i>blaOXA-732</i> |
| STP-inf-A | <i>aac(3)-II</i>  |
| STP-inf-A | <i>mcr-3.12</i>   |
| STP-inf-A | <i>MSI-OXA</i>    |
| STP-inf-A | <i>lnu(F)</i>     |
| STP-inf-A | <i>blaOXA-15</i>  |
| STP-inf-A | <i>blaOXA-21</i>  |
| STP-inf-A | <i>vanW-B</i>     |
| STP-inf-A | <i>blaOXA-224</i> |
| STP-inf-A | <i>blaOXA-320</i> |
| STP-inf-A | <i>blaOXA-299</i> |
| STP-inf-A | <i>blaLEN-1</i>   |
| STP-inf-A | <i>blaOXA-279</i> |
| STP-inf-A | <i>blaOXA-669</i> |

|           |                     |
|-----------|---------------------|
| STP-inf-A | <i>blaOXA-420</i>   |
| STP-inf-A | <i>blaOXA-96</i>    |
| STP-inf-A | <i>rosB</i>         |
| STP-inf-A | <i>patA</i>         |
| STP-inf-A | <i>blaBEL-1</i>     |
| STP-inf-A | <i>aac3-Xa</i>      |
| STP-inf-A | <i>aci1</i>         |
| STP-inf-A | <i>ole(B)</i>       |
| STP-inf-A | <i>blaOXA-62</i>    |
| STP-inf-A | <i>blaSHV-149</i>   |
| STP-inf-A | <i>RSA-1</i>        |
| STP-inf-A | <i>aac3-IIa</i>     |
| STP-inf-A | <i>aac3-IIc</i>     |
| STP-inf-A | <i>blaOKP-A-1</i>   |
| STP-inf-A | <i>blaOKP-A-10</i>  |
| STP-inf-A | <i>blaOKP-B-10</i>  |
| STP-inf-A | <i>blaSHV-108</i>   |
| STP-inf-A | <i>blaTEM-93</i>    |
| STP-inf-A | <i>blaPAM-1</i>     |
| STP-inf-A | <i>sul4</i>         |
| STP-inf-A | <i>tetB(46)</i>     |
| STP-inf-A | <i>blaCPS-1</i>     |
| STP-inf-A | <i>blaGOB-33</i>    |
| STP-inf-A | <i>blaCTX-M-115</i> |
| STP-inf-A | <i>blaCTX-M-77</i>  |
| STP-inf-A | <i>blaORN1a</i>     |
| STP-inf-A | <i>blaR1</i>        |
| STP-inf-A | <i>blaKPC-2</i>     |
| STP-inf-A | <i>aph(2'')-If</i>  |
| STP-inf-A | <i>blaCARB-16</i>   |
| STP-inf-A | <i>CARB-8_OU</i>    |
| STP-inf-A | <i>blaSHV-100</i>   |
| STP-inf-A | <i>mph(F)</i>       |
| STP-inf-A | <i>vgb(A)</i>       |
| STP-inf-A | <i>hugA</i>         |
| STP-inf-A | <i>erm(42)</i>      |
| STP-inf-A | <i>blaAIM-1</i>     |
| STP-inf-A | <i>CARB-3</i>       |
| STP-inf-A | <i>aph(2'')-Ic</i>  |
| STP-inf-A | <i>blaSFC-1</i>     |
| STP-inf-A | <i>blaAST-1</i>     |
| STP-inf-A | <i>erm(W)</i>       |
| STP-inf-A | <i>blaBKC-1</i>     |
| STP-inf-A | <i>blaBRO-1</i>     |

|           |                                        |
|-----------|----------------------------------------|
| STP-inf-A | <i>mphO</i>                            |
| STP-inf-A | <i>blaDES-1</i>                        |
| STP-inf-A | <i>adeL</i>                            |
| STP-inf-A | <i>mexK</i>                            |
| STP-inf-A | <i>ceoB</i>                            |
| STP-inf-A | <i>vanA-A</i>                          |
| STP-inf-A | <i>MuxB</i>                            |
| STP-inf-A | <i>smeB</i>                            |
| STP-inf-A | <i>oqxB12</i>                          |
| STP-inf-A | <i>oqxB15</i>                          |
| STP-inf-A | <i>adeJ</i>                            |
| STP-inf-A | <i>adeF</i>                            |
| STP-inf-A | <i>efrB</i>                            |
| STP-inf-A | <i>Burkholderia_pseudomallei_Omp38</i> |
| STP-inf-A | <i>AmpC2_Ecoli</i>                     |
| STP-inf-A | <i>blaEC-13</i>                        |
| STP-inf-A | <i>blaACT-1</i>                        |
| STP-inf-A | <i>blaACT-50</i>                       |
| STP-inf-A | <i>blaACT-8</i>                        |
| STP-inf-A | <i>blaCMY-115</i>                      |
| STP-inf-A | <i>blaCMY-40</i>                       |
| STP-inf-A | <i>vanS-D</i>                          |
| STP-inf-A | <i>blaCMY-FOX</i>                      |
| STP-inf-A | <i>blaFOX-13</i>                       |
| STP-inf-A | <i>blaFOX-4</i>                        |
| STP-inf-A | <i>blaFOX-9</i>                        |
| STP-inf-A | <i>blaTRU-1</i>                        |
| STP-inf-A | <i>blaADC-120</i>                      |
| STP-inf-A | <i>blaADC-18</i>                       |
| STP-inf-A | <i>TriA</i>                            |
| STP-inf-A | <i>mexM</i>                            |
| STP-inf-A | <i>mexP</i>                            |
| STP-inf-A | <i>tet(55)</i>                         |
| STP-inf-A | <i>blaACC-1</i>                        |
| STP-inf-A | <i>erm(38)</i>                         |
| STP-inf-A | <i>MexC</i>                            |
| STP-inf-A | <i>blaADC-10</i>                       |
| STP-inf-A | <i>AxyX</i>                            |
| STP-inf-A | <i>emeA</i>                            |
| STP-inf-A | <i>adeA</i>                            |
| STP-inf-A | <i>blaPDC-131</i>                      |
| STP-inf-A | <i>Enterobacter_cloacae_acrA</i>       |
| STP-inf-A | <i>tet(H)</i>                          |
| STP-inf-A | <i>ceoA</i>                            |

|           |                                           |
|-----------|-------------------------------------------|
| STP-inf-A | <i>oleD</i>                               |
| STP-inf-A | <i>adeI</i>                               |
| STP-inf-A | <i>ere(B)</i>                             |
| STP-inf-A | <i>tet(V)</i>                             |
| STP-inf-A | <i>AmpC1_Ecoli</i>                        |
| STP-inf-A | <i>OprZ</i>                               |
| STP-inf-A | <i>smeF</i>                               |
| STP-inf-A | <i>smeC</i>                               |
| STP-inf-A | <i>OpmH</i>                               |
| STP-inf-A | <i>adeH</i>                               |
| STP-inf-A | <i>adeK</i>                               |
| STP-inf-A | <i>opmE</i>                               |
| STP-inf-A | <i>msr(C)</i>                             |
| STP-inf-A | <i>lsa(A)</i>                             |
| STP-inf-A | <i>lrfA</i>                               |
| STP-inf-A | <i>tva(A)</i>                             |
| STP-inf-A | <i>qepA2</i>                              |
| STP-inf-A | <i>emrB</i>                               |
| STP-inf-A | <i>TetAB</i>                              |
| STP-inf-A | <i>adeB</i>                               |
| STP-inf-A | <i>vga(C)</i>                             |
| STP-inf-A | <i>oqxB10</i>                             |
| STP-inf-A | <i>oqxB14</i>                             |
| STP-inf-A | <i>oqxB22</i>                             |
| STP-inf-A | <i>oqxB9</i>                              |
| STP-inf-A | <i>mcr-10.1</i>                           |
| STP-inf-A | <i>mcr-3.8</i>                            |
| STP-inf-A | <i>TlrC</i>                               |
| STP-inf-A | <i>mcr-3.7</i>                            |
| STP-inf-A | <i>mcr-3.9</i>                            |
| STP-inf-A | <i>sal(A)</i>                             |
| STP-inf-A | <i>vmlR</i>                               |
| STP-inf-A | <i>tlr(C)</i>                             |
| STP-inf-A | <i>srm(B)</i>                             |
| STP-inf-A | <i>otr(B)</i>                             |
| STP-inf-A | <i>Clostridium_perfringens_mprF</i>       |
| STP-inf-A | <i>efrA</i>                               |
| STP-inf-A | <i>otr(A)</i>                             |
| STP-inf-A | <i>mecB</i>                               |
| STP-inf-A | <i>vanT</i>                               |
| STP-inf-A | <i>vanTc3</i>                             |
| STP-inf-A | <i>Streptomyces_rishiriensis_parY_mut</i> |
| STP-inf-A | <i>mupA</i>                               |
| STP-inf-A | <i>mexI</i>                               |

|             |                    |
|-------------|--------------------|
| STP-inf-A   | <i>mupB</i>        |
| STP-inf-A   | <i>mexN</i>        |
| STP-inf-A   | <i>MexD</i>        |
| STP-inf-A   | <i>oqxB16</i>      |
| STP-inf-A   | <i>mexQ</i>        |
| STP-T-eff-F | <i>tet(Q)</i>      |
| STP-T-eff-F | <i>tet(W)</i>      |
| STP-T-eff-F | <i>msr(E)</i>      |
| STP-T-eff-F | <i>mph(E)</i>      |
| STP-T-eff-F | <i>bla-A</i>       |
| STP-T-eff-F | <i>tet(O)</i>      |
| STP-T-eff-F | <i>erm(B)</i>      |
| STP-T-eff-F | <i>blaAER-1</i>    |
| STP-T-eff-F | <i>tet(39)</i>     |
| STP-T-eff-F | <i>qacH</i>        |
| STP-T-eff-F | <i>blaOXA-129</i>  |
| STP-T-eff-F | <i>erm(F)</i>      |
| STP-T-eff-F | <i>cfxA6</i>       |
| STP-T-eff-F | <i>mef(A)</i>      |
| STP-T-eff-F | <i>blaOXA-1</i>    |
| STP-T-eff-F | <i>aadE</i>        |
| STP-T-eff-F | <i>cfxA</i>        |
| STP-T-eff-F | <i>blaOXA-10</i>   |
| STP-T-eff-F | <i>blaOXA-141</i>  |
| STP-T-eff-F | <i>sull</i>        |
| STP-T-eff-F | <i>mef(C)</i>      |
| STP-T-eff-F | <i>tet(X)</i>      |
| STP-T-eff-F | <i>msr(D)</i>      |
| STP-T-eff-F | <i>tet(40)</i>     |
| STP-T-eff-F | <i>blaMCA</i>      |
| STP-T-eff-F | <i>vanA-G</i>      |
| STP-T-eff-F | <i>aph(6)-Id</i>   |
| STP-T-eff-F | <i>tet(M)</i>      |
| STP-T-eff-F | <i>Mef(En2)</i>    |
| STP-T-eff-F | <i>tet(32)</i>     |
| STP-T-eff-F | <i>lnu(AN2)</i>    |
| STP-T-eff-F | <i>blaOXA-296</i>  |
| STP-T-eff-F | <i>aph(3'')-Ib</i> |
| STP-T-eff-F | <i>mph(G)</i>      |
| STP-T-eff-F | <i>aadS</i>        |
| STP-T-eff-F | <i>blaOXA-20</i>   |
| STP-T-eff-F | <i>dfrF</i>        |
| STP-T-eff-F | <i>blaOXA-392</i>  |
| STP-T-eff-F | <i>aac(3)-I</i>    |

|             |                                             |
|-------------|---------------------------------------------|
| STP-T-eff-F | <i>CblA-1</i>                               |
| STP-T-eff-F | <i>catA13</i>                               |
| STP-T-eff-F | <i>blaOXA-224</i>                           |
| STP-T-eff-F | <i>aadA1</i>                                |
| STP-T-eff-F | <i>AAC(6')-IIa</i>                          |
| STP-T-eff-F | <i>tet(C)</i>                               |
| STP-T-eff-F | <i>blaPAU-1</i>                             |
| STP-T-eff-F | <i>Bifidobacteria_intrinsic_ileS_confer</i> |
| STP-T-eff-F | <i>aadA5</i>                                |
| STP-T-eff-F | <i>erm(G)</i>                               |
| STP-T-eff-F | <i>ere(D)</i>                               |
| STP-T-eff-F | <i>lnu(C)</i>                               |
| STP-T-eff-F | <i>sul2</i>                                 |
| STP-T-eff-F | <i>blaBEL-1</i>                             |
| STP-T-eff-F | <i>tet(A)</i>                               |
| STP-T-eff-F | <i>aadA27</i>                               |
| STP-T-eff-F | <i>blaOXA-118</i>                           |
| STP-T-eff-F | <i>aadA11</i>                               |
| STP-T-eff-F | <i>aph(3'')-III</i>                         |
| STP-T-eff-F | <i>blaOXA-33</i>                            |
| STP-T-eff-F | <i>AAC(6')-Ib7</i>                          |
| STP-T-eff-F | <i>cmxA</i>                                 |
| STP-T-eff-F | <i>ant(3'')-IIa</i>                         |
| STP-T-eff-F | <i>aad9</i>                                 |
| STP-T-eff-F | <i>tet(G)</i>                               |
| STP-T-eff-F | <i>tet(R)</i>                               |
| STP-T-eff-F | <i>lsa(E)</i>                               |
| STP-T-eff-F | <i>aadA6</i>                                |
| STP-T-eff-F | <i>lnu(G)</i>                               |
| STP-T-eff-F | <i>blaOXA-205</i>                           |
| STP-T-eff-F | <i>lin(B)</i>                               |
| STP-T-eff-F | <i>tetR(G)</i>                              |
| STP-T-eff-F | <i>blaOXA-211</i>                           |
| STP-T-eff-F | <i>blaOXA-164</i>                           |
| STP-T-eff-F | <i>blaOXA-5</i>                             |
| STP-T-eff-F | <i>blaOXA-2</i>                             |
| STP-T-eff-F | <i>cfr(C)</i>                               |
| STP-T-eff-F | <i>blaOXA-101</i>                           |
| STP-T-eff-F | <i>cfxA_gen</i>                             |
| STP-T-eff-F | <i>gadW</i>                                 |
| STP-T-eff-F | <i>blaOXA-119</i>                           |
| STP-T-eff-F | <i>aadA24</i>                               |
| STP-T-eff-F | <i>tet(44)</i>                              |
| STP-T-eff-F | <i>aac6-Aph2</i>                            |

|             |                                         |
|-------------|-----------------------------------------|
| STP-T-eff-F | <i>blaOXA-31</i>                        |
| STP-T-eff-F | <i>cblA</i>                             |
| STP-T-eff-F | <i>blaOXA-464</i>                       |
| STP-T-eff-F | <i>floR2</i>                            |
| STP-T-eff-F | <i>aac(6')-30</i>                       |
| STP-T-eff-F | <i>CRP</i>                              |
| STP-T-eff-F | <i>mdtO</i>                             |
| STP-T-eff-F | <i>blaRCP</i>                           |
| STP-T-eff-F | <i>catS</i>                             |
| STP-T-eff-F | <i>blaOXA-333</i>                       |
| STP-T-eff-F | <i>mdtP</i>                             |
| STP-T-eff-F | <i>fosA_gen</i>                         |
| STP-T-eff-F | <i>ampH</i>                             |
| STP-T-eff-F | <i>Klebsiella_pneumoniae_KpnG</i>       |
| STP-T-eff-F | <i>tet(S)</i>                           |
| STP-T-eff-F | <i>aadA2</i>                            |
| STP-T-eff-F | <i>aadA13</i>                           |
| STP-T-eff-F | <i>mdtF</i>                             |
| STP-T-eff-F | <i>spw</i>                              |
| STP-T-eff-F | <i>cat-TC</i>                           |
| STP-T-eff-F | <i>aac3-Ile</i>                         |
| STP-T-eff-F | <i>mdtA</i>                             |
| STP-T-eff-F | <i>acrB</i>                             |
| STP-T-eff-F | <i>Klebsiella_pneumoniae_KpnH</i>       |
| STP-T-eff-F | <i>cfr-Cb</i>                           |
| STP-T-eff-F | <i>catA9</i>                            |
| STP-T-eff-F | <i>aac3-Ib</i>                          |
| STP-T-eff-F | <i>emrR</i>                             |
| STP-T-eff-F | <i>aac3-I</i>                           |
| STP-T-eff-F | <i>tolC</i>                             |
| STP-T-eff-F | <i>sat4</i>                             |
| STP-T-eff-F | <i>cpxA</i>                             |
| STP-T-eff-F | <i>cfxA4</i>                            |
| STP-T-eff-F | <i>blaOXA-320</i>                       |
| STP-T-eff-F | <i>aac(3)-Ia</i>                        |
| STP-T-eff-F | <i>catP</i>                             |
| STP-T-eff-F | <i>Penicillin_Binding_Protein_Ecoli</i> |
| STP-T-eff-F | <i>mdtC</i>                             |
| STP-T-eff-F | <i>blaOXA-209</i>                       |
| STP-T-eff-F | <i>blaOXA-347</i>                       |
| STP-T-eff-F | <i>blaOXA-280</i>                       |
| STP-T-eff-F | <i>acrS</i>                             |
| STP-T-eff-F | <i>oqxA10</i>                           |
| STP-T-eff-F | <i>Escherichia_coli_acrA</i>            |

|             |                                            |
|-------------|--------------------------------------------|
| STP-T-eff-F | <i>nimE_Nitroimidazole_Gene</i>            |
| STP-T-eff-F | <i>mdtN</i>                                |
| STP-T-eff-F | <i>Escherichia_coli_mdfA</i>               |
| STP-T-eff-F | <i>mdtM</i>                                |
| STP-T-eff-F | <i>baeR</i>                                |
| STP-T-eff-F | <i>acrF</i>                                |
| STP-T-eff-F | <i>eptA</i>                                |
| STP-T-eff-F | <i>blaMOX-9</i>                            |
| STP-T-eff-F | <i>pmrF</i>                                |
| STP-T-eff-F | <i>Nocardia_rifampin_resistant_beta-s</i>  |
| STP-T-eff-F | <i>mdtB</i>                                |
| STP-T-eff-F | <i>aadA12</i>                              |
| STP-T-eff-F | <i>aadA17</i>                              |
| STP-T-eff-F | <i>blaOXA-427</i>                          |
| STP-T-eff-F | <i>blaOXA-504</i>                          |
| STP-T-eff-F | <i>ant3"Th-Aac6-IId</i>                    |
| STP-T-eff-F | <i>fosE</i>                                |
| STP-T-eff-F | <i>tet(E)</i>                              |
| STP-T-eff-F | <i>bacA</i>                                |
| STP-T-eff-F | <i>yojI</i>                                |
| STP-T-eff-F | <i>gadX</i>                                |
| STP-T-eff-F | <i>blaOXA-15</i>                           |
| STP-T-eff-F | <i>blaOXA-18</i>                           |
| STP-T-eff-F | <i>H-NS</i>                                |
| STP-T-eff-F | <i>aad(6)</i>                              |
| STP-T-eff-F | <i>evgS</i>                                |
| STP-T-eff-F | <i>aciI</i>                                |
| STP-T-eff-F | <i>aac3-IId</i>                            |
| STP-T-eff-F | <i>AmpC1_Ecoli</i>                         |
| STP-T-eff-F | <i>acrD</i>                                |
| STP-T-eff-F | <i>CARB-10</i>                             |
| STP-T-eff-F | <i>cepA</i>                                |
| STP-T-eff-F | <i>blaEC</i>                               |
| STP-T-eff-F | <i>ampH_Ecoli</i>                          |
| STP-T-eff-F | <i>dfrA15</i>                              |
| STP-T-eff-F | <i>dhfr7</i>                               |
| STP-T-eff-F | <i>ICR-Mo</i>                              |
| STP-T-eff-F | <i>tet(36)</i>                             |
| STP-T-eff-F | <i>cfxA3</i>                               |
| STP-T-eff-F | <i>mdtH</i>                                |
| STP-T-eff-F | <i>mdtG</i>                                |
| STP-T-eff-F | <i>AAC(6')-30/AAC(6')-Ib'_fusion_prote</i> |
| STP-T-eff-F | <i>msbA</i>                                |
| STP-T-eff-F | <i>emrY</i>                                |



|             |                                     |
|-------------|-------------------------------------|
| STP-T-eff-F | <i>tet(42)</i>                      |
| STP-T-eff-F | <i>ant(3'')-IIc</i>                 |
| STP-T-eff-F | <i>blaLCR-1</i>                     |
| STP-T-eff-F | <i>blaOXA-37</i>                    |
| STP-T-eff-F | <i>mcr-3.17</i>                     |
| STP-T-eff-F | <i>blaOXA-281</i>                   |
| STP-T-eff-F | <i>aac(6')-Ib-G</i>                 |
| STP-T-eff-F | <i>aacA38</i>                       |
| STP-T-eff-F | <i>strB</i>                         |
| STP-T-eff-F | <i>Klebsiella_pneumoniae_OmpK37</i> |
| STP-T-eff-F | <i>acrE</i>                         |
| STP-T-eff-F | <i>ugd</i>                          |
| STP-T-eff-F | <i>emrA</i>                         |
| STP-T-eff-F | <i>blaGPC-1</i>                     |
| STP-T-eff-F | <i>Klebsiella_pneumoniae_acrA</i>   |
| STP-T-eff-F | <i>aph(2'')-IIa</i>                 |
| STP-T-eff-F | <i>blaVEB-1</i>                     |
| STP-T-eff-F | <i>blaAIM-1</i>                     |
| STP-T-eff-F | <i>evgA</i>                         |
| STP-T-eff-F | <i>ere(B)</i>                       |
| STP-T-eff-F | <i>vanH-B</i>                       |
| STP-T-eff-F | <i>qnrS2</i>                        |
| STP-T-eff-F | <i>catQ</i>                         |
| STP-T-eff-F | <i>aac3-Ib-Aac6-Ib</i>              |
| STP-T-eff-F | <i>kdpE</i>                         |
| STP-T-eff-F | <i>Pseudomonas_aeruginosa_CpxR</i>  |
| STP-T-eff-F | <i>RbpA</i>                         |
| STP-T-eff-F | <i>tetA(46)</i>                     |
| STP-T-eff-F | <i>emrK</i>                         |
| STP-T-eff-F | <i>erm(A)</i>                       |
| STP-T-eff-F | <i>erm(T)</i>                       |
| STP-T-eff-F | <i>MecI</i>                         |
| STP-T-eff-F | <i>blaEC-18</i>                     |
| STP-T-eff-F | <i>mexW</i>                         |
| STP-T-eff-F | <i>erm(Q)</i>                       |
| STP-T-eff-F | <i>blaNPS-1</i>                     |
| STP-T-eff-F | <i>MexF</i>                         |
| STP-T-eff-F | <i>lnu((B)</i>                      |
| STP-T-eff-F | <i>mef(B)</i>                       |
| STP-T-eff-F | <i>ere(A)</i>                       |
| STP-T-eff-F | <i>blaOXA-373</i>                   |
| STP-T-eff-F | <i>blaOXA-650</i>                   |
| STP-T-eff-F | <i>blaOXA-139</i>                   |
| STP-T-eff-F | <i>aadA10</i>                       |

|             |                                 |
|-------------|---------------------------------|
| STP-T-eff-F | <i>FosA5</i>                    |
| STP-T-eff-F | <i>vanW-G</i>                   |
| STP-T-eff-F | <i>blaOXA-666</i>               |
| STP-T-eff-F | <i>erm(X)</i>                   |
| STP-T-eff-F | <i>ant6-Ib</i>                  |
| STP-T-eff-F | <i>aac(3)-IIe</i>               |
| STP-T-eff-F | <i>blaPSE-4</i>                 |
| STP-T-eff-F | <i>blaL1</i>                    |
| STP-T-eff-F | <i>blaCPS-1</i>                 |
| STP-T-eff-F | <i>aac6-Ig</i>                  |
| STP-T-eff-F | <i>aacA-ACII</i>                |
| STP-T-eff-F | <i>mexK</i>                     |
| STP-T-eff-F | <i>aacA-ACI5</i>                |
| STP-T-eff-F | <i>aph(2'')-If</i>              |
| STP-T-eff-F | <i>CARB-14/blaRTG</i>           |
| STP-T-eff-F | <i>aph(2'')-Ib</i>              |
| STP-T-eff-F | <i>OqxBgb</i>                   |
| STP-T-eff-F | <i>cepA_beta-lactamase</i>      |
| STP-T-eff-F | <i>mph(A)</i>                   |
| STP-T-eff-F | <i>erm(49)</i>                  |
| STP-T-eff-F | <i>aph7</i>                     |
| STP-T-eff-F | <i>baeS</i>                     |
| STP-T-eff-F | <i>mphB</i>                     |
| STP-T-eff-F | <i>iri</i>                      |
| STP-T-eff-F | <i>vanZ-Pa</i>                  |
| STP-T-eff-F | <i>aac(6')</i>                  |
| STP-T-eff-F | <i>aacA-STR-10</i>              |
| STP-T-eff-F | <i>cfxA5</i>                    |
| STP-T-eff-F | <i>dfrA14</i>                   |
| STP-T-eff-F | <i>lin(A)</i>                   |
| STP-T-eff-F | <i>vanH-D</i>                   |
| STP-T-eff-F | <i>nimj_Nitroimidazole_Gene</i> |
| STP-T-eff-F | <i>aac(6')-Iag</i>              |
| STP-T-eff-F | <i>aph4-Ia</i>                  |
| STP-T-eff-F | <i>sat-2A</i>                   |
| STP-T-eff-F | <i>vanG2</i>                    |
| STP-T-eff-F | <i>nimA_Nitroimidazole_Gene</i> |
| STP-T-eff-F | <i>vanT-G</i>                   |
| STP-T-eff-F | <i>mcr-3.12</i>                 |
| STP-T-eff-F | <i>blaDHA-12</i>                |
| STP-T-eff-F | <i>vanS-D</i>                   |
| STP-T-eff-F | <i>blaFOX-2</i>                 |
| STP-T-eff-F | <i>mdtE</i>                     |
| STP-T-eff-F | <i>Salmonella_enterica_cmlA</i> |

|             |                                     |
|-------------|-------------------------------------|
| STP-T-eff-F | <i>bcr1</i>                         |
| STP-T-eff-F | <i>floR</i>                         |
| STP-T-eff-F | <i>vanX-D</i>                       |
| STP-T-eff-F | <i>cmlA1</i>                        |
| STP-T-eff-F | <i>cmlA4</i>                        |
| STP-T-eff-F | <i>tetA(P)</i>                      |
| STP-T-eff-F | <i>catB3</i>                        |
| STP-T-eff-F | <i>vat(E)</i>                       |
| STP-T-eff-F | <i>cat-pC223</i>                    |
| STP-T-eff-F | <i>kamB</i>                         |
| STP-T-eff-F | <i>Acinetobacter_baumannii_AbaQ</i> |
| STP-T-eff-F | <i>qnrA6</i>                        |
| STP-T-eff-F | <i>catB</i>                         |
| STP-T-eff-F | <i>npmA</i>                         |
| STP-T-eff-F | <i>tet(L)</i>                       |
| STP-T-eff-F | <i>blaOXA-664</i>                   |
| STP-T-eff-F | <i>vanR-O</i>                       |
| STP-T-eff-F | <i>blaIMP-22</i>                    |
| STP-T-eff-F | <i>blaOXA-184</i>                   |
| STP-T-eff-F | <i>cfiA13</i>                       |
| STP-T-eff-F | <i>cfiA18</i>                       |
| STP-T-eff-F | <i>blaOXA-85</i>                    |
| STP-T-eff-F | <i>cphA1</i>                        |
| STP-T-eff-F | <i>cphA5</i>                        |
| STP-T-eff-F | <i>vanXY-G</i>                      |
| STP-T-eff-F | <i>aph(3')-VI</i>                   |
| STP-T-eff-F | <i>aph3-VIb</i>                     |
| STP-T-eff-F | <i>erm(O)</i>                       |
| STP-T-eff-F | <i>AxyY</i>                         |
| STP-T-eff-F | <i>vga(A)</i>                       |
| STP-T-eff-F | <i>mexY</i>                         |
| STP-T-eff-F | <i>oqxB12</i>                       |
| STP-T-eff-F | <i>aadA25</i>                       |
| STP-T-eff-F | <i>blaOXA-12</i>                    |
| STP-T-eff-F | <i>APH(6)-Ic</i>                    |
| STP-T-eff-F | <i>blaOXA-732</i>                   |
| STP-T-eff-F | <i>blaOXA-836</i>                   |
| STP-T-eff-F | <i>aac3-Vb</i>                      |
| STP-T-eff-F | <i>mcr-3.3</i>                      |
| STP-T-eff-F | <i>mcr-3.6</i>                      |
| STP-T-eff-F | <i>TlrC</i>                         |
| STP-T-eff-F | <i>mcr-4.1</i>                      |
| STP-T-eff-F | <i>aph(3'')-Ia</i>                  |
| STP-T-eff-F | <i>blaOXA-60</i>                    |

|             |                                           |
|-------------|-------------------------------------------|
| STP-T-eff-F | <i>blaOXA-527</i>                         |
| STP-T-eff-F | <i>blaOXA-643</i>                         |
| STP-T-eff-F | <i>blaOXA-645</i>                         |
| STP-T-eff-F | <i>blaOXA-652</i>                         |
| STP-T-eff-F | <i>blaOXA-662</i>                         |
| STP-T-eff-F | <i>blaOXA-3</i>                           |
| STP-T-eff-F | <i>blaOXA-675</i>                         |
| STP-T-eff-F | <i>blaOXA-299</i>                         |
| STP-T-eff-F | <i>aadA9</i>                              |
| STP-T-eff-F | <i>facT</i>                               |
| STP-T-eff-F | <i>aadA16</i>                             |
| STP-T-eff-F | <i>blaOXA-275</i>                         |
| STP-T-eff-F | <i>str</i>                                |
| STP-T-eff-F | <i>aac3-IIa</i>                           |
| STP-T-eff-F | <i>blaLEN-12</i>                          |
| STP-T-eff-F | <i>blaTEM-107</i>                         |
| STP-T-eff-F | <i>blaTEM-156</i>                         |
| STP-T-eff-F | <i>SHV-1</i>                              |
| STP-T-eff-F | <i>blaTEM-1</i>                           |
| STP-T-eff-F | <i>sul4</i>                               |
| STP-T-eff-F | <i>blaOXA-154</i>                         |
| STP-T-eff-F | <i>blaCRP-1</i>                           |
| STP-T-eff-F | <i>blaLRA-1</i>                           |
| STP-T-eff-F | <i>blaLUT-1</i>                           |
| STP-T-eff-F | <i>vgb(C)</i>                             |
| STP-T-eff-F | <i>mphH</i>                               |
| STP-T-eff-F | <i>blaRm3</i>                             |
| STP-T-eff-F | <i>mph(B)</i>                             |
| STP-T-eff-F | <i>blaECM-1</i>                           |
| STP-T-eff-F | <i>vanY-A</i>                             |
| STP-T-eff-F | <i>blaCSP-1</i>                           |
| STP-T-eff-F | <i>aph(2'')-Ic</i>                        |
| STP-T-eff-F | <i>aph(2'')-Ig</i>                        |
| STP-T-eff-F | <i>blaSGM-2</i>                           |
| STP-T-eff-F | <i>blaCDD-1</i>                           |
| STP-T-eff-F | <i>tet(T)</i>                             |
| STP-T-eff-F | <i>erm(R)</i>                             |
| STP-T-eff-F | <i>vanB</i>                               |
| STP-T-eff-F | <i>smeE</i>                               |
| STP-T-eff-F | <i>oqxB15</i>                             |
| STP-T-eff-F | <i>oqxB17</i>                             |
| STP-T-eff-F | <i>oqxB9</i>                              |
| STP-T-eff-F | <i>otrC</i>                               |
| STP-T-eff-F | <i>Streptomyces_rishiriensis_parY_mut</i> |

|             |                                  |
|-------------|----------------------------------|
| STP-T-eff-F | <i>adeS</i>                      |
| STP-T-eff-F | <i>AmpC2_Ecoli</i>               |
| STP-T-eff-F | <i>blaEC-14</i>                  |
| STP-T-eff-F | <i>blaEC-5</i>                   |
| STP-T-eff-F | <i>blaEC-8</i>                   |
| STP-T-eff-F | <i>blaSRT-2</i>                  |
| STP-T-eff-F | <i>blaCMY-13</i>                 |
| STP-T-eff-F | <i>blaMIR-11</i>                 |
| STP-T-eff-F | <i>blaMOX-4</i>                  |
| STP-T-eff-F | <i>cepS</i>                      |
| STP-T-eff-F | <i>blaADC-130</i>                |
| STP-T-eff-F | <i>blaADC-135</i>                |
| STP-T-eff-F | <i>TriA</i>                      |
| STP-T-eff-F | <i>norA</i>                      |
| STP-T-eff-F | <i>cmr</i>                       |
| STP-T-eff-F | <i>cmrA_variant1</i>             |
| STP-T-eff-F | <i>oqxA11</i>                    |
| STP-T-eff-F | <i>tet(Y)</i>                    |
| STP-T-eff-F | <i>emeA</i>                      |
| STP-T-eff-F | <i>tet(41)</i>                   |
| STP-T-eff-F | <i>smeD</i>                      |
| STP-T-eff-F | <i>blaRSC1-1</i>                 |
| STP-T-eff-F | <i>Enterobacter_cloacae_acrA</i> |
| STP-T-eff-F | <i>Tet(57)</i>                   |
| STP-T-eff-F | <i>tet(B)</i>                    |
| STP-T-eff-F | <i>ere(A2)</i>                   |
| STP-T-eff-F | <i>tet(V)</i>                    |
| STP-T-eff-F | <i>tetA-P</i>                    |
| STP-T-eff-F | <i>MuxA</i>                      |
| STP-T-eff-F | <i>efmA</i>                      |
| STP-T-eff-F | <i>cdeA</i>                      |
| STP-T-eff-F | <i>hp1181</i>                    |
| STP-T-eff-F | <i>tet(K)</i>                    |
| STP-T-eff-F | <i>smeC</i>                      |
| STP-T-eff-F | <i>PmpM</i>                      |
| STP-T-eff-F | <i>OprM</i>                      |
| STP-T-eff-F | <i>lsa(C)</i>                    |
| STP-T-eff-F | <i>msr(C)</i>                    |
| STP-T-eff-F | <i>qepA2</i>                     |
| STP-T-eff-F | <i>emrB</i>                      |
| STP-T-eff-F | <i>tcr-3</i>                     |
| STP-T-eff-F | <i>TetAB</i>                     |
| STP-T-eff-F | <i>MexB</i>                      |
| STP-T-eff-F | <i>smeB</i>                      |

|             |                                    |
|-------------|------------------------------------|
| STP-T-eff-F | <i>oqxB11</i>                      |
| STP-T-eff-F | <i>oqxB21</i>                      |
| STP-T-eff-F | <i>efpA</i>                        |
| STP-T-eff-F | <i>mcr-2.2</i>                     |
| STP-T-eff-F | <i>mcr-9.1</i>                     |
| STP-T-eff-F | <i>mcr-3.10</i>                    |
| STP-T-eff-F | <i>sal(A)</i>                      |
| STP-T-eff-F | <i>mcr-5.1</i>                     |
| STP-T-eff-F | <i>patB</i>                        |
| STP-T-eff-F | <i>taeA</i>                        |
| STP-T-eff-F | <i>tetB-P</i>                      |
| STP-T-eff-F | <i>mecC3</i>                       |
| STP-T-eff-F | <i>mecA</i>                        |
| STP-T-eff-F | <i>vanT-C</i>                      |
| STP-T-eff-F | <i>vanT-Cd</i>                     |
| STP-T-eff-F | <i>Listeria_monocytogenes_mprF</i> |
| STP-T-eff-F | <i>rph</i>                         |
| STP-T-eff-F | <i>Brucella_suis_mprF</i>          |
| STP-T-eff-F | <i>rphB</i>                        |
| STP-T-eff-F | <i>mupA</i>                        |
| STP-T-eff-F | <i>mexI</i>                        |
| STP-T-eff-F | <i>MuxB</i>                        |
| STP-T-eff-F | <i>oqxB10</i>                      |
| STP-T-eff-F | <i>oqxB14</i>                      |
| STP-T-eff-F | <i>oqxB20</i>                      |
| STP-T-eff-F | <i>oqxB26</i>                      |
| STP-T-eff-F | <i>oqxB3</i>                       |
| STP-T-eff-F | <i>adeJ</i>                        |
| STP-T-eff-F | <i>mtrD</i>                        |
| STP-T-eff-A | <i>msr(E)</i>                      |
| STP-T-eff-A | <i>mph(E)</i>                      |
| STP-T-eff-A | <i>tet(39)</i>                     |
| STP-T-eff-A | <i>erm(B)</i>                      |
| STP-T-eff-A | <i>bla-A</i>                       |
| STP-T-eff-A | <i>tet(Q)</i>                      |
| STP-T-eff-A | <i>blaOXA-129</i>                  |
| STP-T-eff-A | <i>blaMCA</i>                      |
| STP-T-eff-A | <i>tet(W)</i>                      |
| STP-T-eff-A | <i>tet(O)</i>                      |
| STP-T-eff-A | <i>blaOXA-296</i>                  |
| STP-T-eff-A | <i>aph(6)-Id</i>                   |
| STP-T-eff-A | <i>aph(3'')-Ib</i>                 |
| STP-T-eff-A | <i>mef(A)</i>                      |
| STP-T-eff-A | <i>blaAER-1</i>                    |

|             |                                           |
|-------------|-------------------------------------------|
| STP-T-eff-A | <i>aadA27</i>                             |
| STP-T-eff-A | <i>qacH</i>                               |
| STP-T-eff-A | <i>erm(F)</i>                             |
| STP-T-eff-A | <i>msr(D)</i>                             |
| STP-T-eff-A | <i>blaOXA-10</i>                          |
| STP-T-eff-A | <i>Bifidobacterium_adolescentis_rpoB_</i> |
| STP-T-eff-A | <i>tet(M)</i>                             |
| STP-T-eff-A | <i>sul1</i>                               |
| STP-T-eff-A | <i>cfxA6</i>                              |
| STP-T-eff-A | <i>aadE</i>                               |
| STP-T-eff-A | <i>mef(C)</i>                             |
| STP-T-eff-A | <i>blaOXA-164</i>                         |
| STP-T-eff-A | <i>blaOXA-141</i>                         |
| STP-T-eff-A | <i>blaOXA-333</i>                         |
| STP-T-eff-A | <i>tet(40)</i>                            |
| STP-T-eff-A | <i>cfxA</i>                               |
| STP-T-eff-A | <i>aac(3)-I</i>                           |
| STP-T-eff-A | <i>blaOXA-1</i>                           |
| STP-T-eff-A | <i>lnu(AN2)</i>                           |
| STP-T-eff-A | <i>mph(G)</i>                             |
| STP-T-eff-A | <i>blaOXA-211</i>                         |
| STP-T-eff-A | <i>tet(X)</i>                             |
| STP-T-eff-A | <i>dfrF</i>                               |
| STP-T-eff-A | <i>Mef(En2)</i>                           |
| STP-T-eff-A | <i>tet(32)</i>                            |
| STP-T-eff-A | <i>cmxA</i>                               |
| STP-T-eff-A | <i>blaOXA-118</i>                         |
| STP-T-eff-A | <i>vanA-G</i>                             |
| STP-T-eff-A | <i>lsa(E)</i>                             |
| STP-T-eff-A | <i>ere(D)</i>                             |
| STP-T-eff-A | <i>aadA5</i>                              |
| STP-T-eff-A | <i>blaOXA-20</i>                          |
| STP-T-eff-A | <i>blaOXA-392</i>                         |
| STP-T-eff-A | <i>tet(C)</i>                             |
| STP-T-eff-A | <i>tet(G)</i>                             |
| STP-T-eff-A | <i>tet(R)</i>                             |
| STP-T-eff-A | <i>tet(A)</i>                             |
| STP-T-eff-A | <i>aac3-IIe</i>                           |
| STP-T-eff-A | <i>aadS</i>                               |
| STP-T-eff-A | <i>blaOXA-280</i>                         |
| STP-T-eff-A | <i>sul2</i>                               |
| STP-T-eff-A | <i>lnu(C)</i>                             |
| STP-T-eff-A | <i>blaOXA-666</i>                         |
| STP-T-eff-A | <i>cfr-Cb</i>                             |

|             |                                             |
|-------------|---------------------------------------------|
| STP-T-eff-A | <i>aadA11</i>                               |
| STP-T-eff-A | <i>blaPAU-1</i>                             |
| STP-T-eff-A | <i>Cbla-1</i>                               |
| STP-T-eff-A | <i>lin(B)</i>                               |
| STP-T-eff-A | <i>erm(G)</i>                               |
| STP-T-eff-A | <i>AAC(6')-IIa</i>                          |
| STP-T-eff-A | <i>blaRCP</i>                               |
| STP-T-eff-A | <i>tetR(G)</i>                              |
| STP-T-eff-A | <i>Bifidobacteria_intrinsic_ileS_confer</i> |
| STP-T-eff-A | <i>strB</i>                                 |
| STP-T-eff-A | <i>aadA1</i>                                |
| STP-T-eff-A | <i>AAC(6')-Ib7</i>                          |
| STP-T-eff-A | <i>blaOXA-224</i>                           |
| STP-T-eff-A | <i>blaOXA-101</i>                           |
| STP-T-eff-A | <i>ant(3'')-IIc</i>                         |
| STP-T-eff-A | <i>catA13</i>                               |
| STP-T-eff-A | <i>spw</i>                                  |
| STP-T-eff-A | <i>tet(S)</i>                               |
| STP-T-eff-A | <i>ant(3'')-IIa</i>                         |
| STP-T-eff-A | <i>blaOXA-119</i>                           |
| STP-T-eff-A | <i>aac6-Aph2</i>                            |
| STP-T-eff-A | <i>aph(3'')-III</i>                         |
| STP-T-eff-A | <i>aadA6</i>                                |
| STP-T-eff-A | <i>blaOXA-427</i>                           |
| STP-T-eff-A | <i>blaOXA-347</i>                           |
| STP-T-eff-A | <i>blaOXA-5</i>                             |
| STP-T-eff-A | <i>lnu(G)</i>                               |
| STP-T-eff-A | <i>catQ</i>                                 |
| STP-T-eff-A | <i>floR2</i>                                |
| STP-T-eff-A | <i>aad9</i>                                 |
| STP-T-eff-A | <i>blaMOX-9</i>                             |
| STP-T-eff-A | <i>blaOXA-209</i>                           |
| STP-T-eff-A | <i>blaOXA-2</i>                             |
| STP-T-eff-A | <i>blaOXA-281</i>                           |
| STP-T-eff-A | <i>blaOXA-464</i>                           |
| STP-T-eff-A | <i>blaOXA-33</i>                            |
| STP-T-eff-A | <i>cfxA_gen</i>                             |
| STP-T-eff-A | <i>blaBEL-1</i>                             |
| STP-T-eff-A | <i>blaOXA-643</i>                           |
| STP-T-eff-A | <i>aadA13</i>                               |
| STP-T-eff-A | <i>cat-TC</i>                               |
| STP-T-eff-A | <i>tet(44)</i>                              |
| STP-T-eff-A | <i>catA9</i>                                |
| STP-T-eff-A | <i>blaOXA-205</i>                           |



|             |                                           |
|-------------|-------------------------------------------|
| STP-T-eff-A | <i>lnu(B)</i>                             |
| STP-T-eff-A | <i>aadA2</i>                              |
| STP-T-eff-A | <i>tet(E)</i>                             |
| STP-T-eff-A | <i>blaOXA-650</i>                         |
| STP-T-eff-A | <i>blaPER-1</i>                           |
| STP-T-eff-A | <i>catS</i>                               |
| STP-T-eff-A | <i>aph3-VIb</i>                           |
| STP-T-eff-A | <i>ICR-Mo</i>                             |
| STP-T-eff-A | <i>ant3''Ih-Aac6-IIId</i>                 |
| STP-T-eff-A | <i>bacA</i>                               |
| STP-T-eff-A | <i>gadX</i>                               |
| STP-T-eff-A | <i>aac3-Ib-Aac6-Ib</i>                    |
| STP-T-eff-A | <i>blaOXA-18</i>                          |
| STP-T-eff-A | <i>tolC</i>                               |
| STP-T-eff-A | <i>Nocardia_rifampin_resistant_beta-s</i> |
| STP-T-eff-A | <i>aac(6')-30</i>                         |
| STP-T-eff-A | <i>blaOXA-139</i>                         |
| STP-T-eff-A | <i>mdtG</i>                               |
| STP-T-eff-A | <i>mph(A)</i>                             |
| STP-T-eff-A | <i>mef(B)</i>                             |
| STP-T-eff-A | <i>aadA24</i>                             |
| STP-T-eff-A | <i>aph7</i>                               |
| STP-T-eff-A | <i>acrB</i>                               |
| STP-T-eff-A | <i>qnrS2</i>                              |
| STP-T-eff-A | <i>aac(3)-IIe</i>                         |
| STP-T-eff-A | <i>erm(A)</i>                             |
| STP-T-eff-A | <i>emrY</i>                               |
| STP-T-eff-A | <i>aph(3'')-Ia</i>                        |
| STP-T-eff-A | <i>blaVEB-1</i>                           |
| STP-T-eff-A | <i>catB3</i>                              |
| STP-T-eff-A | <i>aadA17</i>                             |
| STP-T-eff-A | <i>mdtB</i>                               |
| STP-T-eff-A | <i>aacA-ACII</i>                          |
| STP-T-eff-A | <i>blaOXA-836</i>                         |
| STP-T-eff-A | <i>blaOXA-212</i>                         |
| STP-T-eff-A | <i>blaOXA-15</i>                          |
| STP-T-eff-A | <i>kdpE</i>                               |
| STP-T-eff-A | <i>cfr(C)</i>                             |
| STP-T-eff-A | <i>mdtO</i>                               |
| STP-T-eff-A | <i>aac3-I</i>                             |
| STP-T-eff-A | <i>tetA(P)</i>                            |
| STP-T-eff-A | <i>Klebsiella_pneumoniae_acrA</i>         |
| STP-T-eff-A | <i>mdtF</i>                               |
| STP-T-eff-A | <i>cfxA3</i>                              |

|             |                                            |
|-------------|--------------------------------------------|
| STP-T-eff-A | <i>fosE</i>                                |
| STP-T-eff-A | <i>mdtP</i>                                |
| STP-T-eff-A | <i>CARB-10</i>                             |
| STP-T-eff-A | <i>AAC(6')-30/AAC(6')-Ib' fusion prote</i> |
| STP-T-eff-A | <i>erm(47)</i>                             |
| STP-T-eff-A | <i>blaOXA-645</i>                          |
| STP-T-eff-A | <i>emrA</i>                                |
| STP-T-eff-A | <i>acrF</i>                                |
| STP-T-eff-A | <i>mcr-3.17</i>                            |
| STP-T-eff-A | <i>ant6-Ib</i>                             |
| STP-T-eff-A | <i>Escherichia_coli_mdfA</i>               |
| STP-T-eff-A | <i>cblA</i>                                |
| STP-T-eff-A | <i>ampH</i>                                |
| STP-T-eff-A | <i>CRP</i>                                 |
| STP-T-eff-A | <i>blaOXA-373</i>                          |
| STP-T-eff-A | <i>blaOXA-662</i>                          |
| STP-T-eff-A | <i>msbA</i>                                |
| STP-T-eff-A | <i>aac(3)-Ia</i>                           |
| STP-T-eff-A | <i>mdtH</i>                                |
| STP-T-eff-A | <i>floR</i>                                |
| STP-T-eff-A | <i>MexF</i>                                |
| STP-T-eff-A | <i>acrE</i>                                |
| STP-T-eff-A | <i>evgS</i>                                |
| STP-T-eff-A | <i>vanZ-A</i>                              |
| STP-T-eff-A | <i>Klebsiella_pneumoniae_KpnG</i>          |
| STP-T-eff-A | <i>tet(42)</i>                             |
| STP-T-eff-A | <i>Penicillin_Binding_Protein_Ecoli</i>    |
| STP-T-eff-A | <i>baeS</i>                                |
| STP-T-eff-A | <i>evgA</i>                                |
| STP-T-eff-A | <i>Klebsiella_pneumoniae_KpnH</i>          |
| STP-T-eff-A | <i>eptA</i>                                |
| STP-T-eff-A | <i>tet(T)</i>                              |
| STP-T-eff-A | <i>tetB-P</i>                              |
| STP-T-eff-A | <i>mdtN</i>                                |
| STP-T-eff-A | <i>baeR</i>                                |
| STP-T-eff-A | <i>H-NS</i>                                |
| STP-T-eff-A | <i>aadA10</i>                              |
| STP-T-eff-A | <i>tetA-P</i>                              |
| STP-T-eff-A | <i>erm(T)</i>                              |
| STP-T-eff-A | <i>cpxA</i>                                |
| STP-T-eff-A | <i>emrR</i>                                |
| STP-T-eff-A | <i>ant(2'')-Ia</i>                         |
| STP-T-eff-A | <i>blaRSC1-1</i>                           |
| STP-T-eff-A | <i>erm(Q)</i>                              |

|             |                                 |
|-------------|---------------------------------|
| STP-T-eff-A | <i>Escherichia_coli_emrE</i>    |
| STP-T-eff-A | <i>CARB-14/blaRTG</i>           |
| STP-T-eff-A | <i>acrD</i>                     |
| STP-T-eff-A | <i>ampH_Ecoli</i>               |
| STP-T-eff-A | <i>blaOXA-334</i>               |
| STP-T-eff-A | <i>blaOXA-652</i>               |
| STP-T-eff-A | <i>blaOXA-31</i>                |
| STP-T-eff-A | <i>mphB</i>                     |
| STP-T-eff-A | <i>iri</i>                      |
| STP-T-eff-A | <i>gadW</i>                     |
| STP-T-eff-A | <i>ere(A)</i>                   |
| STP-T-eff-A | <i>mexW</i>                     |
| STP-T-eff-A | <i>aac3-IIId</i>                |
| STP-T-eff-A | <i>catP</i>                     |
| STP-T-eff-A | <i>tet(36)</i>                  |
| STP-T-eff-A | <i>nimE_Nitroimidazole_Gene</i> |
| STP-T-eff-A | <i>mdtE</i>                     |
| STP-T-eff-A | <i>vanY-A</i>                   |
| STP-T-eff-A | <i>emrK</i>                     |
| STP-T-eff-A | <i>mcr-3.6</i>                  |
| STP-T-eff-A | <i>sat4</i>                     |
| STP-T-eff-A | <i>mdtM</i>                     |
| STP-T-eff-A | <i>mdtC</i>                     |
| STP-T-eff-A | <i>str</i>                      |
| STP-T-eff-A | <i>aac3-IIa</i>                 |
| STP-T-eff-A | <i>blaTEM-1</i>                 |
| STP-T-eff-A | <i>Salmonella_enterica_cmlA</i> |
| STP-T-eff-A | <i>dfrB1</i>                    |
| STP-T-eff-A | <i>aph(2'')-IIa</i>             |
| STP-T-eff-A | <i>cphA1</i>                    |
| STP-T-eff-A | <i>cphA5</i>                    |
| STP-T-eff-A | <i>ere(A2)</i>                  |
| STP-T-eff-A | <i>dfrA14</i>                   |
| STP-T-eff-A | <i>lnu(A)</i>                   |
| STP-T-eff-A | <i>nimD_Nitroimidazole_Gene</i> |
| STP-T-eff-A | <i>acrS</i>                     |
| STP-T-eff-A | <i>nimj_Nitroimidazole_Gene</i> |
| STP-T-eff-A | <i>aad(6)</i>                   |
| STP-T-eff-A | <i>cmr</i>                      |
| STP-T-eff-A | <i>aadA16</i>                   |
| STP-T-eff-A | <i>aph4-Ia</i>                  |
| STP-T-eff-A | <i>vanY-D</i>                   |
| STP-T-eff-A | <i>aac6-Im</i>                  |
| STP-T-eff-A | <i>ere(B)</i>                   |

|             |                                     |
|-------------|-------------------------------------|
| STP-T-eff-A | <i>mexK</i>                         |
| STP-T-eff-A | <i>blaAIM-1</i>                     |
| STP-T-eff-A | <i>Klebsiella_pneumoniae_OmpK37</i> |
| STP-T-eff-A | <i>cfxA4</i>                        |
| STP-T-eff-A | <i>pmrF</i>                         |
| STP-T-eff-A | <i>vanH-A</i>                       |
| STP-T-eff-A | <i>aac6-IIc</i>                     |
| STP-T-eff-A | <i>blaNPS-1</i>                     |
| STP-T-eff-A | <i>Enterobacter_cloacae_acrA</i>    |
| STP-T-eff-A | <i>Escherichia_coli_acrA</i>        |
| STP-T-eff-A | <i>blaOXA-37</i>                    |
| STP-T-eff-A | <i>mcr-3.3</i>                      |
| STP-T-eff-A | <i>vanX-A</i>                       |
| STP-T-eff-A | <i>tet(33)</i>                      |
| STP-T-eff-A | <i>yojI</i>                         |
| STP-T-eff-A | <i>blaOXA-644</i>                   |
| STP-T-eff-A | <i>blaOXA-9</i>                     |
| STP-T-eff-A | <i>blaOXA-320</i>                   |
| STP-T-eff-A | <i>MexB</i>                         |
| STP-T-eff-A | <i>aciI</i>                         |
| STP-T-eff-A | <i>SHV-1</i>                        |
| STP-T-eff-A | <i>blaGES-1</i>                     |
| STP-T-eff-A | <i>AmpC1_Ecoli</i>                  |
| STP-T-eff-A | <i>OqxBgb</i>                       |
| STP-T-eff-A | <i>cepA</i>                         |
| STP-T-eff-A | <i>Pseudomonas_aeruginosa_CpxR</i>  |
| STP-T-eff-A | <i>blaRm3</i>                       |
| STP-T-eff-A | <i>mcr-3.12</i>                     |
| STP-T-eff-A | <i>oqxA10</i>                       |
| STP-T-eff-A | <i>blaBKC-1</i>                     |
| STP-T-eff-A | <i>tetB(46)</i>                     |
| STP-T-eff-A | <i>mdtA</i>                         |
| STP-T-eff-A | <i>lnu(P)</i>                       |
| STP-T-eff-A | <i>bla2</i>                         |
| STP-T-eff-A | <i>aph(3')-VIa</i>                  |
| STP-T-eff-A | <i>MuxB</i>                         |
| STP-T-eff-A | <i>blaOXA-725</i>                   |
| STP-T-eff-A | <i>blaOXA-726</i>                   |
| STP-T-eff-A | <i>nimA_Nitroimidazole_Gene</i>     |
| STP-T-eff-A | <i>blaOXA-46</i>                    |
| STP-T-eff-A | <i>aac(6')-Im</i>                   |
| STP-T-eff-A | <i>mcr-3.1</i>                      |
| STP-T-eff-A | <i>lnu(F)</i>                       |
| STP-T-eff-A | <i>blaOXA-309</i>                   |

|             |                            |
|-------------|----------------------------|
| STP-T-eff-A | <i>blaOXA-160</i>          |
| STP-T-eff-A | <i>blaOXA-161</i>          |
| STP-T-eff-A | <i>blaOXA-21</i>           |
| STP-T-eff-A | <i>smeE</i>                |
| STP-T-eff-A | <i>lmrD</i>                |
| STP-T-eff-A | <i>RSA-1</i>               |
| STP-T-eff-A | <i>tetA(46)</i>            |
| STP-T-eff-A | <i>blaPSE-4</i>            |
| STP-T-eff-A | <i>cmrA_variant1</i>       |
| STP-T-eff-A | <i>OqxA</i>                |
| STP-T-eff-A | <i>lsa(C)</i>              |
| STP-T-eff-A | <i>aph(2'')-If</i>         |
| STP-T-eff-A | <i>eat(A)</i>              |
| STP-T-eff-A | <i>cepA_beta-lactamase</i> |
| STP-T-eff-A | <i>vanT-G</i>              |
| STP-T-eff-A | <i>cmlA1</i>               |
| STP-T-eff-A | <i>catA8</i>               |
| STP-T-eff-A | <i>mcr-5.1</i>             |
| STP-T-eff-A | <i>vanR-A</i>              |
| STP-T-eff-A | <i>vanR-D</i>              |
| STP-T-eff-A | <i>ble-MBL</i>             |
| STP-T-eff-A | <i>blaIMP-16</i>           |
| STP-T-eff-A | <i>vanS-D</i>              |
| STP-T-eff-A | <i>cphA7</i>               |
| STP-T-eff-A | <i>imiH</i>                |
| STP-T-eff-A | <i>vanXY-G</i>             |
| STP-T-eff-A | <i>blaFOX-10</i>           |
| STP-T-eff-A | <i>blaFOX-4</i>            |
| STP-T-eff-A | <i>marA</i>                |
| STP-T-eff-A | <i>aac(3)-IVa</i>          |
| STP-T-eff-A | <i>ugd</i>                 |
| STP-T-eff-A | <i>aph(3')-VI</i>          |
| STP-T-eff-A | <i>AxyY</i>                |
| STP-T-eff-A | <i>aadA25</i>              |
| STP-T-eff-A | <i>adeJ</i>                |
| STP-T-eff-A | <i>aphA15</i>              |
| STP-T-eff-A | <i>blaOXA-504</i>          |
| STP-T-eff-A | <i>aadA7</i>               |
| STP-T-eff-A | <i>blaOXA-13</i>           |
| STP-T-eff-A | <i>blaOXA-256</i>          |
| STP-T-eff-A | <i>blaOXA-732</i>          |
| STP-T-eff-A | <i>tet(H)</i>              |
| STP-T-eff-A | <i>vanY-B</i>              |
| STP-T-eff-A | <i>mcr-4.1</i>             |

|             |                                           |
|-------------|-------------------------------------------|
| STP-T-eff-A | <i>srm(B)</i>                             |
| STP-T-eff-A | <i>blaOXA-299</i>                         |
| STP-T-eff-A | <i>vanYD</i>                              |
| STP-T-eff-A | <i>fosA_gen</i>                           |
| STP-T-eff-A | <i>FosA6</i>                              |
| STP-T-eff-A | <i>Streptomyces_rishiriensis_parY_mut</i> |
| STP-T-eff-A | <i>efmA</i>                               |
| STP-T-eff-A | <i>blaCPS-1</i>                           |
| STP-T-eff-A | <i>blaCTX-M-101</i>                       |
| STP-T-eff-A | <i>penI_Bp</i>                            |
| STP-T-eff-A | <i>blaGPC-1</i>                           |
| STP-T-eff-A | <i>aadA9</i>                              |
| STP-T-eff-A | <i>oqxB11</i>                             |
| STP-T-eff-A | <i>arr-8</i>                              |
| STP-T-eff-A | <i>aac(6')_Strep</i>                      |
| STP-T-eff-A | <i>dfr32</i>                              |
| STP-T-eff-A | <i>OpmH</i>                               |
| STP-T-eff-A | <i>dfrG</i>                               |
| STP-T-eff-A | <i>vanZ1</i>                              |
| STP-T-eff-A | <i>emrB</i>                               |
| STP-T-eff-A | <i>sat-2A</i>                             |
| STP-T-eff-A | <i>oqxB15</i>                             |
| STP-T-eff-A | <i>aac3-Ib</i>                            |
| STP-T-eff-A | <i>LpeA</i>                               |
| STP-T-eff-A | <i>catB4</i>                              |
| STP-T-eff-A | <i>aac(6')-Ib-cr3</i>                     |
| STP-T-eff-A | <i>aac(6')-Ib-G</i>                       |
| STP-T-eff-A | <i>aac(6')-Ib-generic</i>                 |
| STP-T-eff-A | <i>aacA38</i>                             |
| STP-T-eff-A | <i>otr(B)</i>                             |
| STP-T-eff-A | <i>mexV</i>                               |
| STP-T-eff-A | <i>sta</i>                                |
| STP-T-eff-A | <i>blaFOX-3</i>                           |
| STP-T-eff-A | <i>blaFOX-9</i>                           |
| STP-T-eff-A | <i>blaADC-18</i>                          |
| STP-T-eff-A | <i>MexA</i>                               |
| STP-T-eff-A | <i>blaACC-1</i>                           |
| STP-T-eff-A | <i>Tet(53)</i>                            |
| STP-T-eff-A | <i>dfrA36</i>                             |
| STP-T-eff-A | <i>smeD</i>                               |
| STP-T-eff-A | <i>AAC(6')-Ib-cr</i>                      |
| STP-T-eff-A | <i>Tet(48)</i>                            |
| STP-T-eff-A | <i>tetA(D)</i>                            |
| STP-T-eff-A | <i>vanX-B</i>                             |

|             |                                     |
|-------------|-------------------------------------|
| STP-T-eff-A | <i>AAC(6')-Ib10</i>                 |
| STP-T-eff-A | <i>vanX-D</i>                       |
| STP-T-eff-A | <i>cmlA</i>                         |
| STP-T-eff-A | <i>cmlA5</i>                        |
| STP-T-eff-A | <i>smeB</i>                         |
| STP-T-eff-A | <i>aac(2')-Id</i>                   |
| STP-T-eff-A | <i>catB8</i>                        |
| STP-T-eff-A | <i>fusC</i>                         |
| STP-T-eff-A | <i>Acinetobacter_baumannii_AbaQ</i> |
| STP-T-eff-A | <i>catA1</i>                        |
| STP-T-eff-A | <i>catA16</i>                       |
| STP-T-eff-A | <i>catB</i>                         |
| STP-T-eff-A | <i>npmA</i>                         |
| STP-T-eff-A | <i>vanS-B</i>                       |
| STP-T-eff-A | <i>AAC(6')-Ib8</i>                  |
| STP-T-eff-A | <i>mtrA</i>                         |
| STP-T-eff-A | <i>tet(L)</i>                       |
| STP-T-eff-A | <i>Mbl</i>                          |
| STP-T-eff-A | <i>smeC</i>                         |
| STP-T-eff-A | <i>PmpM</i>                         |
| STP-T-eff-A | <i>erm(44)</i>                      |
| STP-T-eff-A | <i>erm(C)</i>                       |
| STP-T-eff-A | <i>msr(C)</i>                       |
| STP-T-eff-A | <i>blaIMP-39</i>                    |
| STP-T-eff-A | <i>OpmB</i>                         |
| STP-T-eff-A | <i>cfiA10</i>                       |
| STP-T-eff-A | <i>blaOXA-85</i>                    |
| STP-T-eff-A | <i>cepH-A3</i>                      |
| STP-T-eff-A | <i>vanXY-G2</i>                     |
| STP-T-eff-A | <i>qepA2</i>                        |
| STP-T-eff-A | <i>BcII</i>                         |
| STP-T-eff-A | <i>blaOXA-34</i>                    |
| STP-T-eff-A | <i>aph3-Va</i>                      |
| STP-T-eff-A | <i>blaLCR-1</i>                     |
| STP-T-eff-A | <i>vga(E)</i>                       |
| STP-T-eff-A | <i>aadA4</i>                        |
| STP-T-eff-A | <i>blaFIM-1</i>                     |
| STP-T-eff-A | <i>blaOXA-198</i>                   |
| STP-T-eff-A | <i>aadA12</i>                       |
| STP-T-eff-A | <i>aadA15</i>                       |
| STP-T-eff-A | <i>aadA3</i>                        |
| STP-T-eff-A | <i>blaOXA-780</i>                   |
| STP-T-eff-A | <i>blaOXA-663</i>                   |
| STP-T-eff-A | <i>blaOXA-779</i>                   |

|             |                     |
|-------------|---------------------|
| STP-T-eff-A | <i>blaOXA-827</i>   |
| STP-T-eff-A | <i>blaOXA-830</i>   |
| STP-T-eff-A | <i>aph3-IIc</i>     |
| STP-T-eff-A | <i>blaAFM-1</i>     |
| STP-T-eff-A | <i>mcr-10.1</i>     |
| STP-T-eff-A | <i>aph(3')-Ia</i>   |
| STP-T-eff-A | <i>aph(3')-Ib</i>   |
| STP-T-eff-A | <i>blaOXA-304</i>   |
| STP-T-eff-A | <i>blaOXA-651</i>   |
| STP-T-eff-A | <i>blaOXA-24</i>    |
| STP-T-eff-A | <i>blaOXA-458</i>   |
| STP-T-eff-A | <i>blaOXA-675</i>   |
| STP-T-eff-A | <i>blaOXA-669</i>   |
| STP-T-eff-A | <i>blaOXA-274</i>   |
| STP-T-eff-A | <i>blaZ</i>         |
| STP-T-eff-A | <i>vanW-G</i>       |
| STP-T-eff-A | <i>blaOXA-727</i>   |
| STP-T-eff-A | <i>erm(X)</i>       |
| STP-T-eff-A | <i>blaPEDO-2</i>    |
| STP-T-eff-A | <i>blaSHV-149</i>   |
| STP-T-eff-A | <i>aac3-IIc</i>     |
| STP-T-eff-A | <i>blaPOM-1</i>     |
| STP-T-eff-A | <i>blaSHV-128</i>   |
| STP-T-eff-A | <i>blaSHV-42</i>    |
| STP-T-eff-A | <i>blaSHV-67</i>    |
| STP-T-eff-A | <i>blaTEM-106</i>   |
| STP-T-eff-A | <i>aac(3)-VIII</i>  |
| STP-T-eff-A | <i>blaGES-10</i>    |
| STP-T-eff-A | <i>sul4</i>         |
| STP-T-eff-A | <i>CARB-1</i>       |
| STP-T-eff-A | <i>CARB-2</i>       |
| STP-T-eff-A | <i>CARB-4</i>       |
| STP-T-eff-A | <i>blaCAU-1</i>     |
| STP-T-eff-A | <i>blaESP-1</i>     |
| STP-T-eff-A | <i>blaCTX-M-115</i> |
| STP-T-eff-A | <i>blaSFO-1</i>     |
| STP-T-eff-A | <i>blaA_Yent</i>    |
| STP-T-eff-A | <i>blaFRI-1</i>     |
| STP-T-eff-A | <i>blaCME-1</i>     |
| STP-T-eff-A | <i>blaLRA-1</i>     |
| STP-T-eff-A | <i>blaCARB-16</i>   |
| STP-T-eff-A | <i>mphH</i>         |
| STP-T-eff-A | <i>blaVEB-24</i>    |
| STP-T-eff-A | <i>vanY-Pt2</i>     |



|             |                    |
|-------------|--------------------|
| STP-T-eff-A | <i>cepA-44</i>     |
| STP-T-eff-A | <i>cepA-49</i>     |
| STP-T-eff-A | <i>hugA</i>        |
| STP-T-eff-A | <i>aph(2'')-Id</i> |
| STP-T-eff-A | <i>erm(42)</i>     |
| STP-T-eff-A | <i>blaEFM-1</i>    |
| STP-T-eff-A | <i>blaL2</i>       |
| STP-T-eff-A | <i>blaR39</i>      |
| STP-T-eff-A | <i>blaEVM-1</i>    |
| STP-T-eff-A | <i>aph(2'')-Ic</i> |
| STP-T-eff-A | <i>aph(2'')-Ig</i> |
| STP-T-eff-A | <i>aph(6)-Ia</i>   |
| STP-T-eff-A | <i>aph6-Ib</i>     |
| STP-T-eff-A | <i>blaM-1</i>      |
| STP-T-eff-A | <i>vanH-B</i>      |
| STP-T-eff-A | <i>vanH-M</i>      |
| STP-T-eff-A | <i>vanJ</i>        |
| STP-T-eff-A | <i>erm(30)</i>     |
| STP-T-eff-A | <i>TriC</i>        |
| STP-T-eff-A | <i>vanB</i>        |
| STP-T-eff-A | <i>mexI</i>        |
| STP-T-eff-A | <i>vanA-D</i>      |
| STP-T-eff-A | <i>vanN</i>        |
| STP-T-eff-A | <i>MuxC</i>        |
| STP-T-eff-A | <i>mexY</i>        |
| STP-T-eff-A | <i>vanH-Ao1</i>    |
| STP-T-eff-A | <i>cfr(B)</i>      |
| STP-T-eff-A | <i>vanG</i>        |
| STP-T-eff-A | <i>vanG2</i>       |
| STP-T-eff-A | <i>oqxB17</i>      |
| STP-T-eff-A | <i>otrC</i>        |
| STP-T-eff-A | <i>vanS-G</i>      |
| STP-T-eff-A | <i>mexH</i>        |
| STP-T-eff-A | <i>AmpC2_Ecoli</i> |
| STP-T-eff-A | <i>blaEC</i>       |
| STP-T-eff-A | <i>blaEC-13</i>    |
| STP-T-eff-A | <i>blaEC-19</i>    |
| STP-T-eff-A | <i>blaEC-5</i>     |
| STP-T-eff-A | <i>blaACT-28</i>   |
| STP-T-eff-A | <i>blaACT-3</i>    |
| STP-T-eff-A | <i>blaACT-38</i>   |
| STP-T-eff-A | <i>blaCFE-1</i>    |
| STP-T-eff-A | <i>blaCMY-101</i>  |
| STP-T-eff-A | <i>blaCMY-105</i>  |

|             |                                     |
|-------------|-------------------------------------|
| STP-T-eff-A | <i>blaCMY-FOX</i>                   |
| STP-T-eff-A | <i>blaFOX-13</i>                    |
| STP-T-eff-A | <i>blaFOX-16</i>                    |
| STP-T-eff-A | <i>blaFOX-2</i>                     |
| STP-T-eff-A | <i>blaMOX-3</i>                     |
| STP-T-eff-A | <i>blaADC-133</i>                   |
| STP-T-eff-A | <i>blaADC-2</i>                     |
| STP-T-eff-A | <i>blaMOX-6</i>                     |
| STP-T-eff-A | <i>vanS-A</i>                       |
| STP-T-eff-A | <i>erm(38)</i>                      |
| STP-T-eff-A | <i>mexX</i>                         |
| STP-T-eff-A | <i>oqxA11</i>                       |
| STP-T-eff-A | <i>macA</i>                         |
| STP-T-eff-A | <i>blaADC-8</i>                     |
| STP-T-eff-A | <i>blaPDC-125</i>                   |
| STP-T-eff-A | <i>blaPDC-160</i>                   |
| STP-T-eff-A | <i>amrA</i>                         |
| STP-T-eff-A | <i>bcr1</i>                         |
| STP-T-eff-A | <i>adeG</i>                         |
| STP-T-eff-A | <i>mdsA</i>                         |
| STP-T-eff-A | <i>adeH</i>                         |
| STP-T-eff-A | <i>opmD</i>                         |
| STP-T-eff-A | <i>Acinetobacter_baumannii_AmvA</i> |
| STP-T-eff-A | <i>cmeC</i>                         |
| STP-T-eff-A | <i>lsa(B)</i>                       |
| STP-T-eff-A | <i>lsa(A)</i>                       |
| STP-T-eff-A | <i>farB</i>                         |
| STP-T-eff-A | <i>opcM</i>                         |
| STP-T-eff-A | <i>mupA</i>                         |
| STP-T-eff-A | <i>MexD</i>                         |
| STP-T-eff-A | <i>lin</i>                          |
| STP-T-eff-A | <i>oqxB10</i>                       |
| STP-T-eff-A | <i>oqxB20</i>                       |
| STP-T-eff-A | <i>oqxB7</i>                        |
| STP-T-eff-A | <i>tetAB_B</i>                      |
| STP-T-eff-A | <i>tcmA</i>                         |
| STP-T-eff-A | <i>mcr-7.1</i>                      |
| STP-T-eff-A | <i>mcr-9.1</i>                      |
| STP-T-eff-A | <i>mcr-3.13</i>                     |
| STP-T-eff-A | <i>mcr-4.3</i>                      |
| STP-T-eff-A | <i>rif</i>                          |
| STP-T-eff-A | <i>tlr(C)</i>                       |
| STP-T-eff-A | <i>vga(B)</i>                       |
| STP-T-eff-A | <i>rosB</i>                         |

|             |                                     |
|-------------|-------------------------------------|
| STP-T-eff-A | <i>Clostridium perfringens_mprF</i> |
| STP-T-eff-A | <i>ole(B)</i>                       |
| STP-T-eff-A | <i>Tet(60)</i>                      |
| STP-T-eff-A | <i>blaR1-2</i>                      |
| STP-T-eff-A | <i>novA</i>                         |
| STP-T-eff-A | <i>mecA1</i>                        |
| STP-T-eff-A | <i>mecC3</i>                        |
| STP-T-eff-A | <i>mexN</i>                         |
| STP-T-eff-A | <i>cmeB</i>                         |
| STP-T-eff-A | <i>amrB</i>                         |
| STP-T-eff-A | <i>oqxB12</i>                       |
| STP-T-eff-A | <i>oqxB13</i>                       |
| STP-T-eff-A | <i>oqxB14</i>                       |
| STP-T-eff-A | <i>oqxB16</i>                       |
| STP-T-eff-A | <i>oqxB18</i>                       |
| STP-T-eff-A | <i>oqxB2</i>                        |
| STP-T-eff-A | <i>oqxB21</i>                       |
| STP-T-eff-A | <i>oqxB24</i>                       |
| STP-T-eff-A | <i>oqxB26</i>                       |
| STP-T-eff-A | <i>oqxB28</i>                       |
| STP-T-eff-A | <i>oqxB31</i>                       |
| STP-T-eff-A | <i>oqxB9</i>                        |
| STP-T-eff-A | <i>mexQ</i>                         |
| STP-T-eff-A | <i>mtrD</i>                         |

---

**Legend:** eff (effluent); F (February); A (April); STP (sewage treatme

s) across six samples.

**Relativ abundance**

---

0.0372923062621251  
0.032236423540148  
0.0193719187723776  
0.0166497703688608  
0.015556603627471  
0.0139625061479274  
0.0129271753275136  
0.011574584145  
0.0102528809466608  
0.00965529656184482  
0.00891643711299312  
0.0078168655903987  
0.007600594376  
0.0073244477957278  
0.007089543107832  
0.0068017960249891  
0.0047688841420738  
0.004717879048929  
0.004665479269  
0.0043274733557832  
0.004215638272  
0.0040741468986264  
0.0038586602889911  
0.0037488469748781  
0.00347193046150099  
0.00342327892870512  
0.00316614576030465  
0.0031520111810176  
0.0029989889965618  
0.0025164690978005  
0.0024589028112496  
0.0023710879025514  
0.0023564825315244  
0.002343886532  
0.002285172400419  
0.0022684066454636  
0.0022369508089109  
0.0021934142315363  
0.0021702285712824  
0.0021583750546437  
0.0019993259977079

0.0018767580275615  
0.001851820095  
0.0017105410860866  
0.00170250213435309  
0.00166732799939058  
0.00166289168083224  
0.00150778617301045  
0.00138518877  
0.0013418427269861  
0.0013339916304114  
0.00133247060954897  
0.0013276659549252  
0.0013093083971184  
0.0012826603293345  
0.0012700636460849  
0.001236346191  
0.0012292651533288  
0.001219453899277  
0.0012193605046305  
0.00114366481836079  
0.001126132054675  
0.0010291244244971  
0.0010115218922531  
0.0009911655598837  
0.0009854723435904  
0.0009812751993196  
0.0009750811218329  
0.0009645963785874  
0.0009183193330753  
0.000911280984011791  
0.0009046130743727  
0.0008927102707625  
0.0008736483236607  
0.000812305617804049  
0.0008116301973901  
0.000798603729719586  
0.0007874684593744  
0.0007690734049802  
0.000738424687603452  
0.000723396753954513  
0.000714936139423551  
0.0006784598057795  
0.0006656284146537  
0.00056806271258

0.0005653831714828  
0.000565030444597184  
0.000523075587222249  
0.0005180965789589  
0.0005143558094357  
0.000513460227  
0.0004826441707781  
0.0004806741945708  
0.0004801884470129  
0.0004687540476295  
0.0004440827819648  
0.0004371736047154  
0.00043276242755484  
0.0004276352715216  
0.0004276352715216  
0.0004226470921249  
0.0004194115163  
0.0004097550511096  
0.0004072902467555  
0.0004043800166898  
0.0004029640058569  
0.0004011020235426  
0.0003990940033997  
0.000396466223953484  
0.0003914191187189  
0.0003907795449955  
0.000378294152238062  
0.000356497763299512  
0.0003490271564028  
0.000339229902889698  
0.0003230760979902  
0.0003220758623927  
0.0003218969881435  
0.000321544931649  
0.000321406454073  
0.0003191679193855  
0.0003160220347153  
0.0003157611674697  
0.0003119355428871  
0.0003098623516512  
0.0003040093118793  
0.0002929446484367  
0.0002896544326809  
0.0002878314327549

0.0002834000859563  
0.0002832362708777  
0.0002826915857414  
0.0002821531255781  
0.000280935737382813  
0.0002795152757893  
0.0002785946062379  
0.0002713839223118  
0.0002713839223118  
0.0002711531536704  
0.0002709127696689  
0.00026317068340119  
0.0002627506855024  
0.0002625749560445  
0.0002605881284201  
0.0002601763267001  
0.000256969698965086  
0.0002561606602188  
0.000253108874787627  
0.0002525867675196  
0.0002504119237018  
0.0002478391984582  
0.0002458187702099  
0.0002456973782247  
0.0002389947791126  
0.0002366720252719  
0.0002365001501628  
0.0002353631302101  
0.0002321046703982  
0.0002316159079311  
0.0002312931156066  
0.0002301559813116  
0.0002281370691948  
0.0002261532685931  
0.0002259360224177  
0.0002238377061161  
0.0002226379328119  
0.0002202241566825  
0.0002189797926277  
0.000218396986426421  
0.0002120186893061  
0.0002110763840203  
0.0002104711076323  
0.000208159794804906

0.0002071969517325  
0.0002037416834172  
0.0002019225612439  
0.0002017724329455  
0.0001991690717724  
0.0001988785025317  
0.0001985736016915  
0.0001973701253176  
0.0001944304119126  
0.0001939716143879  
0.000193907908524  
0.000193845658794163  
0.0001920993015077  
0.0001870854290065  
0.0001846149131372  
0.0001824708524101  
0.0001820428787437  
0.0001816256820308  
0.0001815829163886  
0.0001771079814284  
0.0001751355278667  
0.0001744112611258  
0.0001739640527639  
0.0001736126102331  
0.0001735191319129  
0.0001730764810662  
0.0001720731391469  
0.0001692303370425  
0.0001661012707181  
0.0001657157571588  
0.0001654780014096  
0.0001652261323055  
0.0001642453905984  
0.0001611666971583  
0.0001583072880152  
0.0001524628777032  
0.0001524628777032  
0.0001498871565724  
0.0001474069332168  
0.0001459053345762  
0.0001450794553239  
0.0001449700439699  
0.0001418382869225  
0.000135939123198



0.0001291074796916  
0.0001281840388787  
0.000127052398086  
0.000126814916968045  
0.0001256407047739  
0.000124000486696  
0.0001202942918048  
0.0001181397671755  
0.0001155527649746  
0.0001122746723512  
0.0001121421166577  
0.000111405551  
0.0001103186676064  
0.0001093720955754  
0.000108703845061814  
0.0001084296493255  
0.000105507610094186  
0.0001054327592509  
0.000104675673135551  
0.0000966969942757763  
0.0000949183426577261  
0.0000898622259310692  
0.0000898622259310692  
0.0000894851062778813  
0.0000882158139902518  
0.0000856641168913602  
0.0000841500534300245  
0.0000787990482903104  
0.000077775791458064  
0.0000772573277802826  
0.0000769228804738745  
0.0000767622060499081  
0.0000759670155161861  
0.000075384422864397  
0.000075133976  
0.000074885188275891  
0.0000743925225635496  
0.0000734794013479682  
0.0000729526672881261  
0.000072245967563085  
0.0000682726848583218  
0.0000677612789792332  
0.000066884515665269  
0.0000653150234204161

0.0000646152195980545  
0.0000641707468923069  
0.000064156955629274  
0.000063705146082589  
0.000063259655505429  
0.0000632105409111403  
0.0000628203523869975  
0.0000624732786169035  
0.0000621727198881624  
0.0000620812894177387  
0.0000619597996145728  
0.0000616781641617793  
0.0000611225050251867  
0.0000611225050251867  
0.00006065413333917  
0.0000598289070352357  
0.0000597385992510315  
0.000058632328894531  
0.000057566286550994  
0.0000572539920489091  
0.0000568224292947716  
0.0000561373361756147  
0.0000554297226944095  
0.0000551593338032173  
0.0000542148246627512  
0.0000537947832048503  
0.0000525937833937653  
0.0000516429918766563  
0.0000513984701348161  
0.0000510600041978982  
0.0000510120154721483  
0.0000499666203423957  
0.000049764777930042  
0.0000496434004228955  
0.0000494324084356701  
0.0000493425313294234  
0.0000491173293450745  
0.0000489862675653121  
0.0000488980040201494  
0.0000484614146985409  
0.000048375030715121  
0.000047520266562084  
0.0000474447416629072  
0.0000473619410666368

0.0000472794289741862  
0.0000467500296833469  
0.0000443437781555276  
0.0000432140003681256  
0.0000429404940366818  
0.0000429404940366818  
0.0000426704280364511  
0.0000423507993620207  
0.0000421927739912669  
0.0000420750267150122  
0.000041880234924665  
0.000041187761078529  
0.0000408710726373236  
0.0000408710726373236  
0.0000396760120338931  
0.0000396760120338931  
0.0000393995241451552  
0.0000393799223918491  
0.0000393310032335984  
0.0000388579499301015  
0.000038724874759108  
0.0000376026812387728  
0.0000368257238130675  
0.000036673503015112  
0.0000358973442211414  
0.0000358973442211414  
0.0000358973442211414  
0.0000347038263825868  
0.0000344286612511042  
0.0000341363424291609  
0.0000338806394896166  
0.0000337542191930135  
0.0000333805562499174  
0.0000328950208862823  
0.0000328711146211033  
0.000032657511710208  
0.000032657511710208  
0.000032657511710208  
0.0000323076097990272  
0.0000321110117677958  
0.0000318525730412945  
0.0000315196193161241  
0.0000315196193161241  
0.0000315196193161241

0.0000315196193161241  
0.0000309798998072864  
0.0000309798998072864  
0.0000307691521895498  
  0.000029601213166648  
0.0000294982524251988  
  0.000029447040181405  
0.0000288460801777029  
0.0000286269960244545  
0.0000286269960244545  
0.0000286269960244545  
0.0000284469520243007  
0.0000279732872665222  
0.0000279732872665222  
  0.000026923008165856  
    0.000026711016  
0.0000266062668933165  
0.0000266062668933165  
0.0000266062668933165  
0.0000266062668933165  
0.0000261448865425654  
0.0000258460878392218  
0.0000256022568218706  
0.0000255540416489481  
0.0000255060077360741  
  0.00002541048  
0.0000254104796172124  
0.0000254104796172124  
0.0000253156643947601  
0.0000249433752124843  
  0.000024581877020999  
0.0000244490020100747  
0.0000242740538740455  
0.0000242464517984902  
0.0000240588583609777  
0.0000238056072203358  
0.0000238056072203358  
0.0000237828485136242  
0.0000236809705333184  
0.0000236397144870931  
0.0000236397144870931  
0.0000236397144870931  
0.0000236397144870931  
  0.000023557632145124

0.000023557632145124  
0.0000231358842550579  
0.0000230768641421623  
0.0000227862235358378  
0.0000217455065954991  
0.0000213352140182255  
0.0000210701803037134  
0.0000210375133575061  
0.0000208628476561984  
0.0000206532665381909  
0.000019751377169711  
0.0000193661219537461  
0.0000191655312367111  
0.0000185371531633763  
0.0000181285185245042  
0.0000180922614874552  
0.0000180922614874552  
0.0000179486721105707  
0.0000179486721105707  
0.0000177607278999888  
0.0000177607278999888  
0.0000177549180446077  
0.000017737511262211  
0.000017737511262211  
0.000017343042  
0.00001732975238262  
0.0000173164830469518  
0.0000173076481066217  
0.000017132823378272  
0.000017132823378272  
0.0000170896676518784  
0.0000170040051573827  
0.0000170040051573827  
0.0000169403197448083  
0.0000169403197448083  
0.0000168771095965067  
0.000016752093969866  
0.0000164475104431411  
0.0000163879180139993  
0.000016328755855104  
0.000016328755855104  
0.000016328755855104  
0.000016328755855104  
0.0000161538048995136

0.00001606202191713  
0.0000160392389073185  
0.0000159262865206472  
0.0000158704048135572  
0.000015759809658062  
0.000015759809658062  
0.000015759809658062  
0.000015759809658062  
0.000015759809658062  
0.000015759809658062  
0.0000154899499036432  
0.0000154899499036432  
0.0000153845760947749  
0.0000153696396131294  
0.0000151780717176638  
0.0000151780717176638  
0.0000150768845728794  
0.0000149770376551782  
0.000014829722530701  
0.000014685277181376  
0.0000144970043969994  
0.0000143134980122272  
0.0000141937197861835  
0.0000139600783082216  
0.0000137062587026176  
0.0000133031334466582  
0.0000132511680816322  
0.000013085049291795  
0.0000125408466872379  
0.0000124946557233807  
0.0000122909385104995  
0.0000119028036101679  
0.0000118404852666592  
0.0000118404852666592  
0.0000118095701615243  
0.0000118095701615243  
0.0000118095701615243  
0.0000117993009700795  
0.0000115384320710811  
0.0000115188422033883  
0.0000114507984097818  
0.0000114507984097818  
0.0000112794647677402  
0.0000112234872750963

0.0000111957063659995  
0.0000111405551031128  
0.0000108310952391375  
0.0000107692032663424  
0.0000107181643883028  
0.0000107181643883028  
0.0000105926589505007  
  0.000010518756678753  
0.0000104218096125894  
0.0000103740031464766  
0.0000103266332690954  
0.0000102796940269632  
0.0000102796940269632  
0.0000102331795743525  
0.0000100067817961588  
  9.96269905696876E-06  
  9.74798571522375E-06  
  9.70614886666055E-06  
  9.42305285804962E-06  
0.0000093645245794282  
  9.32590798322437E-06  
  9.26857658168815E-06  
  9.23074565686493E-06  
  9.11908341101576E-06  
  9.04613074372764E-06  
  9.04613074372764E-06  
  9.04613074372764E-06  
  8.86875563110552E-06  
  8.86875563110552E-06  
  8.83411205442152E-06  
  8.83411205442152E-06  
  8.79973807755607E-06  
  8.76563056562755E-06  
  8.76563056562755E-06  
  8.69820263819965E-06  
  0.00000866487619131  
  8.60716531277606E-06  
  8.60716531277606E-06  
  8.59898359669927E-06  
  8.53408560729022E-06  
  8.47015987240415E-06  
  8.47015987240415E-06  
  8.47015987240415E-06  
  8.47015987240415E-06

8.47015987240415E-06  
8.43855479825339E-06  
8.43855479825339E-06  
8.40718470606658E-06  
0.000008376046984933  
8.34513906247937E-06  
8.22375522157058E-06  
8.22375522157058E-06  
8.22375522157058E-06  
8.19395900699967E-06  
8.19395900699967E-06  
8.19395900699967E-06  
8.19395900699967E-06  
8.19395900699967E-06  
8.19395900699967E-06  
8.16437792755202E-06  
8.16437792755202E-06  
8.13500966162557E-06  
8.07690244975682E-06  
8.04815902466872E-06  
8.04815902466872E-06  
7.99128157573113E-06  
7.96314326032362E-06  
7.95380780515325E-06  
7.93520240677863E-06  
7.93520240677863E-06  
7.93520240677863E-06  
7.93520240677863E-06  
7.90745694381786E-06  
7.87990482903104E-06  
7.85254404837468E-06  
7.85254404837468E-06  
7.85254404837468E-06



7.85254404837468E-06  
7.83440884272024E-06  
7.81185729164735E-06  
0.000007798388572179  
0.0000077715899860203  
0.0000077715899860203  
0.0000077715899860203  
0.0000077449749518216  
7.69228804738745E-06  
7.69228804738745E-06  
7.69228804738745E-06  
7.66621249468444E-06  
7.56365446799969E-06  
0.0000075384422864397  
0.0000075384422864397  
0.0000075384422864397  
0.0000075384422864397  
0.0000074638042439997  
0.0000074638042439997  
0.0000074638042439997  
7.36655598023423E-06  
7.34263859068801E-06  
7.34263859068801E-06  
7.31887600625213E-06  
7.06728964353721E-06  
6.95856211055972E-06  
6.93721682801199E-06  
6.93721682801199E-06  
0.0000069160020976511  
6.71077948347747E-06  
6.57422292422066E-06  
6.57422292422066E-06  
6.51738526205161E-06  
6.46152195980545E-06  
6.45537398458204E-06  
6.45537398458204E-06  
6.45537398458204E-06  
6.45537398458204E-06  
0.0000063705146082589  
6.31713040763103E-06  
6.16221440308422E-06  
6.14546925524975E-06  
5.99876044013769E-06  
5.96710471222139E-06

5.95140180508397E-06  
5.93578132790527E-06  
0.0000059202426333296  
0.0000059202426333296  
0.0000059202426333296  
0.0000059202426333296  
5.90478508076216E-06  
5.90478508076216E-06  
5.90478508076216E-06  
5.88940803628101E-06  
5.88940803628101E-06  
5.88940803628101E-06  
5.84375371041837E-06  
5.82869248951523E-06  
5.82869248951523E-06  
5.79880175879976E-06  
5.78397106376447E-06  
5.76921603554058E-06  
5.73993067495408E-06  
5.72539920489091E-06  
5.68224292947716E-06  
5.68224292947716E-06  
5.66800171912759E-06  
5.57027755155642E-06  
5.33380350455639E-06  
5.27163796254524E-06  
5.17513200442084E-06  
5.03682112679712E-06  
5.01448489120157E-06  
0.0000048323347989998  
4.77116600407576E-06  
4.63428829084407E-06  
4.59661115026811E-06  
4.53212963112607E-06  
4.45183599592895E-06  
4.40844578154368E-06  
4.40844578154368E-06  
4.36168309726501E-06  
4.30358265638803E-06  
4.30358265638803E-06  
4.19579348039315E-06  
4.18028222907931E-06  
4.18028222907931E-06  
4.17256953123968E-06

4.10441503798894E-06  
4.03845122487841E-06  
3.52263658244845E-06  
3.48464204303838E-06  
3.40592271977697E-06  
3.22615219105835E-06  
3.14101761934987E-06  
2.61146961424008E-06  
2.19993451938901E-06  
2.18294660804238E-06  
0.0000021724617540172  
2.16001211645836E-06  
2.15179132819401E-06  
2.15179132819401E-06  
2.15179132819401E-06  
2.15179132819401E-06  
2.15179132819401E-06  
2.15179132819401E-06  
0.000002141602922284  
0.0677224472176267  
0.0583401140368887  
0.0365458507813935  
0.0267970646865953  
0.0257189331463022  
0.0233680272851706  
0.018102599311392  
0.0176016503307348  
0.0157499087671951  
0.0097891678323759  
0.008976934477  
0.0081847674037917  
0.0080472762517517  
0.0078933636559208  
0.0076636398911908  
0.0066858442560617  
0.0064936997583802  
0.0060965716145545  
0.00587667524  
0.0057692365757952  
0.0054719105743607  
0.0050276337770239  
0.004290027233  
0.004256710896  
0.0041107557948336

0.0039773466002277  
0.0036932917375787  
0.003482012974  
0.0032793348260563  
0.00322728150453527  
0.0030733316338348  
0.00305152206576504  
0.00277752069431282  
0.0026651226091685  
0.00260559392261993  
0.0025796146869727  
0.00240359614769158  
0.0021259136113744  
0.0019669057285564  
0.0019625141024096  
0.0019603376474116  
0.0019547595494417  
0.0019506693812476  
0.001864859988  
0.0017768830184622  
0.0017763827698647  
0.0016136452712842  
0.0014904503036266  
0.001427802194805  
0.0014022853244258  
0.0013773810516443  
0.0013488984025387  
0.0013344729462703  
0.0013092516752977  
0.0012792778398271  
0.00126192916  
0.0012004158365827  
0.00119926538429875  
0.0011905116223697  
0.0011755268840673  
0.0011601087717984  
0.0011383156837023  
0.00111610464597152  
0.0011148083571841  
0.0010552262107367  
0.00103292239962957  
0.001015197155  
0.0009847982170337  
0.0009775406338016

0.0009695454500359  
0.0009405376230097  
0.0009334693402671  
0.0009334693402671  
0.0009031281555567  
0.0008928837167772  
0.000880735638997917  
0.000830877903112099  
0.0008238834756883  
0.0008117124697975  
0.000808013259323099  
0.00076417975760213  
0.000744069763981  
0.0007405433669953  
0.0007372119781379  
0.0007134915545023  
0.0007034841404911  
0.0006999959452086  
0.0006764270581646  
0.0006764270581646  
0.0006470171860704  
0.0006446813839547  
0.000643906526522  
0.0006358414346747  
0.000635116691398071  
0.0006036327555475  
0.0006003496873196  
0.0005866703908312  
0.000570843732098505  
0.000565832520137542  
0.0005611699337287  
0.000554475064505055  
0.000550459774  
0.0005409017787805  
0.0005340385107571  
0.0005299334074865  
0.000529676781139  
0.0004952786354672  
0.0004928254280913  
0.0004764978784115  
0.000471783364843  
0.000468488369913916  
0.0004650436024881  
0.0004425693763456

0.0004331913009478  
0.0004305207149672  
0.0004242503040242  
0.000423701249374913  
0.000423167638283  
0.000421517353979366  
0.00041693564361  
0.000413331825530776  
0.0004092383701895  
0.000407132512367  
0.0003971158852707  
0.0003956199154091  
0.0003878355912642  
0.0003827519362042  
0.000378924416842138  
0.0003758901657417  
0.0003710833861286  
0.0003702716834976  
0.0003566137469857  
0.000347055104553588  
0.00034493300317  
0.0003365139636095  
0.000336031506314006  
0.0003344793103069  
0.0003306976728804  
0.0003258699696267  
0.0003244490249917  
0.000324301506253435  
0.0003241212987038  
0.0003211811930853  
0.0003180967392484  
0.0003171444895657  
0.0003122920542256  
0.0003111564467557  
0.0003045899618635  
0.0003045899618635  
0.0003001748436598  
0.0002988366831873  
0.000298701083136589  
0.0002949056991388  
0.0002941301417446  
0.0002919251811239  
0.0002905415268878  
0.0002861806784542

0.0002807810430117  
0.000278528788656  
0.0002718063064771  
0.0002705708232658  
0.0002701929310545  
0.0002693465208981  
0.0002683292521179  
0.0002642293195955  
0.0002607721135447  
0.0002570422821025  
0.0002565757806831  
0.000253084953735005  
0.000253084953735  
0.0002492541392988  
0.000249248740773474  
0.0002475232077759  
0.0002473064244445  
0.0002465728262705  
0.0002441927796849  
0.0002359922758895  
0.000232298437362  
0.000231556980492  
0.0002312081187511  
0.0002262985900185  
0.000226098547066  
0.0002204881187089  
0.0002204651152536  
0.0002188440482297  
0.0002148937946515  
0.000210405331717  
0.000208194702817  
0.0002038547298578  
0.0001975406453047  
0.0001954122612475  
0.0001927641875598  
0.0001898137153012  
0.000184862053162962  
0.000184698168364  
0.0001825076779576  
0.0001771594676145  
0.0001762270493639  
0.000174391350933  
0.000172466501585  
0.0001715054420523

0.0001710505204554  
0.000168517542365  
0.000167206688535  
0.000167206688535  
0.000165683550684  
0.0001646172044205  
0.0001617542965176  
0.00016087994896881  
0.0001578329802384  
0.0001538490113494  
0.0001532727978238  
0.00014782842993  
0.00014782842993  
0.0001451199894289  
0.0001441995666629  
0.0001430903392271  
0.0001393389071125  
0.0001377906970335  
0.000137588063655515  
0.000134795247098  
0.0001332094206615  
0.000131927263117211  
0.0001296288787423  
0.0001290294388406  
0.0001275548166824  
0.0001252642700304  
0.0001236944620428  
0.0001215800267942  
0.0001212143725783  
0.0001208777594915  
0.00012074154385086  
0.000119873477206501  
0.0001166659908681  
0.000116260900622  
0.0001127378430274  
0.0001127378430274  
0.0001123124172046  
0.000111055188653891  
0.000109961049  
0.0001088882581435  
0.0001062956805687  
0.000105168871234073  
0.000104065701256  
0.0001037031029938



0.0001005499681055  
0.0000986675974077863  
0.0000965359973228934  
0.0000964534879234721  
0.0000941860460735532  
0.0000935936810039082  
0.0000931751046130142  
0.0000907402151196428  
0.0000907402151196428  
0.0000896469595157916  
0.0000891864443127995  
0.0000885797338072703  
0.0000870596447715761  
0.0000853850548830737  
0.0000845533822705762  
0.0000839965867147022  
0.0000813190998886416  
0.0000811712469797531  
0.0000805851729943398  
0.00008043997448444  
0.0000794380530940645  
0.0000777773272454081  
0.0000772390758457859  
0.0000761846174724646  
0.0000729480160765755  
0.0000708637870458162  
0.0000706954645112656  
0.0000701952607529312  
0.00006966945355628  
0.00006966945355628  
0.0000688953485167658  
0.0000678324469267456  
0.0000672352196368437  
0.0000671543108286165  
0.0000666729179194507  
0.0000652692775421992  
0.0000650410632850586  
0.0000647017186070496  
0.0000630567596594127  
0.0000626705007947303  
0.000062421960065526  
0.0000617998142841421  
0.0000595255811184856  
0.0000595255811184856

0.000058282226943687  
0.0000577693916134371  
0.000056944114590388  
0.000056637089551366  
0.0000561562086023449  
0.0000551162788134126  
0.0000537982688974368  
0.0000537234486628932  
0.000053530198847559  
0.000053530198847559  
0.0000530972714544056  
0.0000509636824644569  
0.0000492109632262613  
0.0000491676055494099  
0.0000485685224530725  
0.0000475227039039005  
0.0000470930230367766  
0.0000467380505013235  
0.0000452780789440813  
0.0000449783104306346  
0.0000432598699988994  
0.0000427626301138546  
0.0000425182722274897  
0.0000422766911352881  
0.0000406595499443208  
0.0000402925864971699  
0.00004021998724222  
0.0000397190265470322  
0.0000397190265470322  
0.0000391615665253195  
0.0000391615665253195  
0.0000390246379710351  
0.000038888663622704  
0.0000387536335406807  
0.0000383870901451971  
0.0000382227618483426  
0.0000382227618483426  
0.0000379627430602587  
0.0000371107114205022  
0.0000369571074825035  
0.0000364740080382877  
0.0000363848295345266  
0.0000357725848067822  
0.0000355447339481403

0.0000346616349680623  
0.0000346078959991195  
0.0000344832239738198  
0.0000327784036996066  
0.0000327784036996066  
    0.00003242134  
0.0000323508593035248  
0.0000318887041706173  
0.0000318583628726433  
0.0000318583628726433  
0.0000308316200544642  
0.0000307466844620277  
0.0000301242819425534  
0.0000297627905592428  
0.0000292173991092043  
0.0000291792064306302  
0.0000291792064306302  
    0.000028508420075903  
    0.000028508420075903  
    0.000028472057295194  
    0.000027867781422512  
    0.000027867781422512  
    0.000027867781422512  
    0.000027867781422512  
    0.000027867781422512  
0.0000273555060287158  
0.000027220645358928  
0.0000270570823265844  
0.0000270570823265844  
0.0000268617243314466  
0.0000268617243314466  
0.0000265739201421811  
0.0000265739201421811  
0.0000265739201421811  
0.0000264793510313548  
0.0000263854526234422  
0.0000261996395767982  
0.0000260164253140234  
0.0000260164253140234  
0.0000259257757484693  
0.0000258357556937871  
    0.000025632324546592  
    0.000025569407696944  
0.0000254818412322284

0.0000247199257136568  
0.0000243957299665924  
0.0000243957299665924  
0.0000243160053588585  
0.0000242368001296765  
0.0000240799276369278  
0.0000235465115183883  
0.0000235465115183883  
0.0000233494695809959  
0.0000228242258889899  
0.000022547568605487  
0.0000224117398789479  
0.0000218844048229726  
0.0000217564258473997  
0.0000206686045550297  
0.0000206304001103808  
0.00002010999362111  
0.00002010999362111  
0.0000197890894675816  
0.0000197890894675816  
0.0000197365985140867  
0.0000196843852905045  
0.0000196843852905045  
0.0000195807832626597  
0.0000194782660728029  
0.0000193768167703403  
0.0000192764187559862  
0.0000192266088883997  
0.0000192266088883997  
0.0000190299172373675  
0.0000189813715301293  
0.0000188372092147106  
0.0000187423114352914  
0.0000183268414773662  
0.0000182370040191438  
0.0000177667087865585  
0.000017715946761454  
0.0000174664263845321  
0.0000173848075696511  
0.0000173039479995597  
0.0000172238371291914  
0.0000169878941548189  
0.0000169106764541152  
0.000016461720442059

0.0000161754296517624  
0.0000160359862926954  
0.0000159671623171903  
0.0000158989265807921  
0.000015853759175733  
0.0000153733422310138  
0.0000152473312291203  
0.0000150621409712767  
0.0000149112177150515  
0.0000147049360470567  
0.0000146470425980525  
0.0000146039207847118  
0.0000145896032153151  
0.0000145896032153151  
0.0000145326125777552  
0.0000145326125777552  
0.0000144199566662998  
0.0000143090339227129  
0.0000141592723878415  
0.0000141458130034424  
0.0000141458130034424  
0.0000141458130034424  
0.0000140922303784293  
0.0000140922303784293  
0.0000140523090459125  
0.0000140390521505862  
0.0000140390521505862  
0.0000139862737590426  
0.000013933890711256  
0.000013933890711256  
0.000013933890711256  
0.000013933890711256  
0.000013933890711256  
0.000013933890711256  
0.000013933890711256  
0.0000138818985817363  
0.0000138818985817363  
0.0000138818985817363  
0.0000137790697033531  
0.000013728224427695  
0.000013728224427695  
0.0000136777530143579  
0.0000135779154011144

0.0000135531833147736  
0.0000135285411632922  
0.0000135285411632922  
0.0000135285411632922  
0.000013479524709802  
0.000013479524709802  
0.000013479524709802  
0.000013479524709802  
0.000013479524709802  
0.000013479524709802  
0.000013479524709802  
0.0000134308621657233  
0.0000134308621657233  
0.0000134308621657233  
0.0000133345835838901  
0.0000132869600710905  
0.0000132396755156774  
0.0000131927263117211  
0.0000130538555084398  
0.0000130538555084398  
0.0000129628878742346  
0.0000129628878742346  
0.0000129628878742346  
0.0000129628878742346  
0.0000129628878742346  
0.0000129628878742346  
0.0000129628878742346  
0.0000129628878742346  
0.0000129628878742346  
0.0000129628878742346  
0.0000129628878742346  
0.0000129628878742346  
0.0000129628878742346  
0.0000129628878742346  
0.0000129628878742346  
0.0000129628878742346  
0.0000128731793076309  
0.0000128731793076309  
0.0000128287890341563  
0.000012784703848472  
0.000012784703848472  
0.0000127409206161142  
0.0000126974362454107  
0.0000126974362454107  
0.0000126542476867529  
0.0000126113519318825

0.0000126113519318825  
0.0000124011627330178  
0.0000124011627330178  
0.0000124011627330178  
0.0000122379895391623  
0.0000121978649832962  
0.0000120399638184639  
0.0000120399638184639  
0.0000120399638184639  
0.0000119625363984095  
0.000011924194935594  
0.0000117361161511209  
0.0000116260900622042  
0.0000115538783226874  
0.0000114121129444949  
0.0000112058699394739  
0.0000111890190072341  
0.0000111722186783944  
0.0000108782129236998  
0.0000108570490853269  
0.0000108149674997248  
0.0000107628220440849  
0.0000106194542908811  
0.0000106194542908811  
0.0000106194542908811  
0.0000105392317844344  
0.000010450418033442  
9.89454473379083E-06  
9.86829925704338E-06  
9.84219264525226E-06  
9.84219264525226E-06  
9.79039163132988E-06  
9.79039163132988E-06  
9.79039163132988E-06  
9.76469506536838E-06  
9.73913303640145E-06  
9.73913303640145E-06  
9.73913303640145E-06  
9.73913303640145E-06  
0.0000097137044906145  
0.0000097137044906145  
0.0000097137044906145  
9.68840838517019E-06  
9.56387871440965E-06

9.56387871440965E-06  
9.53935594847526E-06  
9.51495861868377E-06  
9.49068576506468E-06  
9.49068576506468E-06  
9.44250969519125E-06  
9.41860460735532E-06  
9.39482025228625E-06  
9.34761010026471E-06  
9.30087204976338E-06  
9.16342073868314E-06  
9.07402151196427E-06  
0.0000089003560284817  
8.85797338072703E-06  
0.0000088369330639082  
8.75376192918906E-06  
8.75376192918906E-06  
8.55252602277093E-06  
8.41707877806641E-06  
0.0000080877148258812  
8.01799314634774E-06  
7.94946329039605E-06  
7.78315652699865E-06  
7.71856601640115E-06  
0.0000076708223090832  
7.54634649068023E-06  
7.36702736614921E-06  
7.26630628887764E-06  
7.25214194913324E-06  
7.25214194913324E-06  
7.14764422652325E-06  
7.11347766712304E-06  
7.11347766712304E-06  
7.11347766712304E-06  
7.07963619392075E-06  
7.07963619392075E-06  
7.07963619392075E-06  
7.07963619392075E-06  
6.90231692004704E-06  
6.87680003679363E-06  
6.87680003679363E-06  
6.87680003679363E-06  
6.86411221384751E-06  
6.85147112321428E-06



6.75199422850336E-06  
6.64348003554527E-06  
6.03952730504115E-06  
5.61138585204427E-06  
5.51162788134126E-06  
5.26216240439229E-06  
5.16715113875743E-06  
0.0000043872037970582  
4.29601480358585E-06  
3.62960860478571E-06  
3.61198914553917E-06  
3.57382211326162E-06  
3.56355250948788E-06  
3.54318935229081E-06  
3.53981809696037E-06  
3.53981809696037E-06  
3.53981809696037E-06  
3.53981809696037E-06  
3.52974271338268E-06  
3.50976303764656E-06  
2.56046030275661E-06  
0.010308547969  
0.008031538621  
0.0063003712973163  
0.0052812693864861  
0.0051824848572932  
0.00507702602  
0.0035575774932906  
0.00294185326849832  
0.0022453736169767  
0.00170173536307392  
0.001573664772  
0.0015177157649234  
0.0014073364365652  
0.001402448673658  
0.0013733677981508  
0.001124499697  
0.001084345619734  
0.001010798699439  
0.0009605543196423  
0.0009444331282637  
0.0009213008979261  
0.0009032361744374  
0.000878526213379508

0.000806138286  
0.00080006468145556  
0.000725516272140771  
0.0007090338800778  
0.0007055340453245  
0.0006649991443677  
0.000597326955798278  
0.000586518318116286  
0.0005722365825628  
0.0005682701773696  
0.0005496574848644  
0.0004747690861001  
0.000472087974  
0.0004714546172756  
0.0004563967511725  
0.0004376420611874  
0.000417415059446197  
0.0004132195941102  
0.0004101243162517  
0.000407357399364  
0.000401965904372456  
0.000354553115  
0.000352404308477721  
0.0003445904657178  
0.0003301031788708  
0.0002900889124665  
0.0002814243690834  
0.0002717200804943  
0.000256222737500295  
0.0002438330196015  
0.0002398098931053  
0.00023850363  
0.0002357879849077  
0.0002311277513961  
0.0002220694112403  
0.0002212185705842  
0.0002200121547286  
0.0002050621581258  
0.000205062158  
0.0002005552975077  
0.0001850311426797  
0.0001772584700194  
0.0001748236744312  
0.0001696640786973

0.0001672500856472  
0.000162881926705084  
0.000160976131930932  
0.000157032065754802  
0.000156956319788644  
0.0001539349871221  
0.0001504164731308  
0.0001449666009159  
0.0001368409791659  
0.0001344845102446  
0.0001316144139894  
0.000129466859448776  
0.0001247899628937  
0.0001238723896371  
0.0001225210544774  
0.0001225210544774  
0.0001200214345188  
0.0001197628790804  
0.000119649467263139  
0.0001178636543189  
0.0001146319089585  
0.0001142698788125  
0.000114048853901886  
0.00011252530051  
0.0001119738410613  
0.0001119664544368  
0.0001104180851447  
0.0001075971851592  
0.0001037655669713  
0.0001037655669713  
0.0001036548752663  
0.0001031674945392  
0.0001017127492727  
0.0001014369279302  
0.0001005296026452  
0.0001002776487538  
0.0000982720957787923  
0.000096055431964233  
0.0000946440729811804  
0.0000944923997873003  
0.0000944134587682632  
0.0000922261587079385  
0.0000915578532100549  
0.0000914050020360815

0.0000883928903830407  
0.0000872883160137311  
0.0000861720971388752  
0.0000859522703604597  
0.000084540645482277  
0.0000842332249532505  
0.0000832814371006714  
0.0000830255801510534  
0.0000827619022466435  
0.0000800461933035275  
0.0000797663115087599  
0.0000796702901535473  
0.0000782351934550314  
0.0000779937268085653  
0.0000776343087126733  
0.0000770425837987047  
0.000074616046  
0.0000734592078080673  
0.0000730345881097548  
0.0000708692998404752  
0.0000707181925913484  
0.0000688179942428517  
0.0000674222519748006  
0.0000673096546430084  
0.0000669334917110181  
0.0000664299881334783  
0.0000662210887997252  
0.0000653268624181231  
0.0000649613560050775  
0.0000647947884255773  
0.000063813049207008  
0.0000623436697844782  
0.0000614841058052923  
0.0000614118055868007  
0.0000611652048415719  
0.0000610385688067033  
0.0000607451141489787  
0.0000603232730784997  
0.0000598247336315699  
0.0000594867407861938  
0.0000591110350549126  
0.000059092185872816  
0.0000589995648918242  
0.0000589043531141612

0.0000586991114656798  
0.0000574792477968831  
0.0000574317442863071  
0.0000573015135736398  
0.0000554165953639806  
0.0000549347119260329  
0.0000517221556730485  
0.0000513617225324698  
0.0000502884925094033  
0.0000500911185497446  
0.0000489728052053782  
0.0000489728052053782  
0.0000488106435987379  
0.0000484113153065625  
0.0000476432267835127  
0.0000466809744199048  
0.0000459453954290457  
0.0000459453954290457  
0.0000451249419392413  
0.0000451249419392413  
0.0000448049068900268  
0.0000435689094585778  
0.0000433298482269807  
0.0000415966542979015  
0.0000407580120741534  
0.0000399209596934836  
0.0000398831557543799  
0.0000394843241968362  
0.0000389968634042826  
0.0000382878295242047  
0.0000382878295242047  
0.0000380113831016473  
0.0000379428941230858  
0.0000369443969093204  
0.0000356920444717163  
0.0000354915273679426  
0.0000350971770638543  
0.0000350323024297252  
0.000034807117749277  
0.0000342411483549799  
0.0000341486047107772  
0.000034102520223988  
0.0000329036034973634  
0.0000320035049214477

0.0000318261555238981  
0.0000317861226238681  
0.0000316666259222746  
0.0000315480243270601  
0.0000315480243270601  
0.000031430307818377  
0.0000311206496132699  
0.0000306302636193638  
0.0000306302636193638  
0.0000300832946261609  
0.0000300832946261609  
0.0000297643904428447  
0.0000296595862511445  
0.0000295670446403765  
0.0000293836831232269  
0.0000288469948470036  
0.0000286507567868199  
0.0000281716471415553  
0.0000279535038561672  
0.0000278549024316304  
0.0000271970744775255  
0.0000268600844876436  
0.000026581312222274  
0.0000259979089361884  
0.0000258913601290729  
0.0000254590921706715  
0.0000253714532991718  
0.0000242980456595915  
0.0000240666357009287  
0.0000240666357009287  
0.0000240666357009287  
0.0000240437369038774  
0.0000238395919679011  
0.0000236610182452951  
0.0000230565396769846  
0.0000228068298609884  
0.0000227657364738515  
0.000022608611  
0.0000225771314445846  
0.0000224024534450134  
0.0000222839219453043  
0.0000220121667996299  
0.0000220121667996299  
0.0000220121667996299

0.000021935735664909  
0.0000209883450880192  
0.0000207812232614927  
0.0000206453982728555  
0.0000205949205264671  
0.0000200078919128861  
0.0000194623902387362  
0.0000192137830641538  
0.0000191439147621024  
0.0000186356692374448  
0.0000183915338325874  
0.0000180757993461911  
0.0000165379368363711  
0.0000165325269780668  
0.0000165163186182844  
0.0000165163186182844  
0.0000165163186182844  
0.0000164518017486817  
0.0000164090697960877  
0.000016183136398319  
0.000016124277364711  
0.0000160291579359182  
0.000015953262301752  
0.000015893061311934  
0.000015893061311934  
0.00001577401216353  
0.00001577401216353  
0.0000153151318096819  
0.0000153151318096819  
0.0000153151318096819  
0.0000153151318096819  
0.0000152596422016758  
0.0000152596422016758  
0.0000152596422016758  
0.0000152045532406589  
0.0000152045532406589  
0.0000150416473130804  
0.0000150059189346645  
0.0000146747778664199  
0.0000146747778664199  
0.0000146747778664199  
0.0000146492565136087  
0.000014498016263135  
0.000014473062706744

0.0000144234974235018  
0.0000143253783934099  
0.0000142285852961571  
0.0000141330914351091  
0.0000140858235707776  
0.0000140388708255417  
0.0000140388708255417  
0.0000140255131939284  
0.0000136299716752832  
0.0000130796933157221  
0.0000126097642145584  
0.0000121024748496049  
0.0000120218684519387  
0.0000120218684519387  
0.0000119310516930949  
0.0000118305091226475  
0.0000118305091226475  
0.000011764416892912  
0.000011764416892912  
0.0000116558890617966  
0.0000116344233360843  
0.0000115072711684768  
0.0000115072711684768  
0.0000113828682369257  
0.0000110252912242474  
0.0000110252912242474  
0.0000109965045630875  
0.0000109678678324545  
0.0000109678678324545  
0.0000109110395017163  
0.000010854797030058  
0.0000108268926675129  
0.0000107715121423594  
0.0000107440337950574  
0.0000107440337950574  
0.0000107440337950574  
0.0000107440337950574  
0.0000106624335383861  
0.000010582063436338  
0.0000103735498710899  
0.0000103735498710899  
0.0000103480620335688  
0.0000100277648753869  
0.0000100277648753869



0.0000100182237099489  
9.98023992337092E-06  
9.98023992337092E-06  
9.79456104107564E-06  
9.57195738105119E-06  
9.40102957067528E-06  
9.15582859051679E-06  
9.07685613720372E-06  
9.07685613720372E-06  
8.84802783122379E-06  
8.81100679427307E-06  
8.68383762404645E-06  
8.61280418744893E-06  
8.54292342325056E-06  
8.52563005599701E-06  
8.52563005599701E-06  
8.45715109972395E-06  
8.38976344155881E-06  
8.25815930914221E-06  
8.25815930914221E-06  
8.22590087434087E-06  
8.17798300516995E-06  
8.16213420089637E-06  
8.16213420089637E-06  
8.06831656640331E-06  
8.04519818082622E-06  
8.01457896795914E-06  
8.01457896795914E-06  
8.00696054688693E-06  
0.000007976631150876  
7.94653065596703E-06  
7.94653065596703E-06  
7.94653065596703E-06  
7.94653065596703E-06  
7.91665648056866E-06  
7.88700608176503E-06  
7.88700608176503E-06  
7.88700608176503E-06  
7.82836663134298E-06  
7.82836663134298E-06  
7.79937268085653E-06  
7.77059270786444E-06  
7.74202435232082E-06  
7.74202435232082E-06

0.0000077136652887592  
7.65756590484095E-06  
7.64366832606629E-06  
7.62982110083791E-06  
7.62982110083791E-06  
7.62982110083791E-06  
7.60227662032947E-06  
7.60227662032947E-06  
0.0000075749303015513  
7.52082365654022E-06  
7.46748448167114E-06  
7.38887938186408E-06  
7.33738893320997E-06  
7.31191188830299E-06  
7.31191188830299E-06  
7.23653135337204E-06  
7.23653135337204E-06  
7.23653135337204E-06  
0.0000072117487117509  
0.0000072117487117509  
0.0000072117487117509  
0.0000072117487117509  
0.0000072117487117509  
0.0000072117487117509  
7.18713523491898E-06  
7.16268919670497E-06  
7.16268919670497E-06  
7.15052843406201E-06  
7.01943541277087E-06  
6.97294908553398E-06  
6.94993605224839E-06  
6.90436270108611E-06  
6.90436270108611E-06  
6.81498583764162E-06

6.81498583764162E-06  
6.72789336687304E-06  
6.70646695487663E-06  
6.58072069947269E-06  
6.58072069947269E-06  
6.53984665786106E-06  
6.53984665786106E-06  
6.51959945458595E-06  
6.51959945458595E-06  
6.49947723404711E-06  
6.47947884255773E-06  
6.43984900254209E-06  
6.36202605387088E-06  
6.15739948488673E-06  
6.13944788288998E-06  
6.12160065067227E-06  
0.0000060862156758129  
6.03966718116041E-06  
6.01093422596935E-06  
0.000005982473363157  
5.96552584654749E-06  
5.89868522081586E-06  
5.81721166804216E-06  
5.67609332569073E-06  
0.0000056155483302167  
5.58575762289459E-06  
5.57098048632609E-06  
5.57098048632609E-06  
5.54165953639806E-06  
5.51264561212372E-06  
5.51264561212372E-06  
5.49825228154377E-06  
5.49825228154377E-06  
5.49825228154377E-06  
5.49825228154377E-06  
5.48393391622724E-06  
5.48393391622724E-06  
5.48393391622724E-06  
5.48393391622724E-06  
5.48393391622724E-06  
5.37201689752873E-06  
5.37201689752873E-06  
5.30435925398303E-06  
0.000005291031718169

0.000005291031718169  
0.000005291031718169  
0.000005291031718169  
0.000005291031718169  
5.27777098704577E-06  
5.23838463639617E-06  
5.07429065983437E-06  
5.03787230581642E-06  
5.01388243769348E-06  
5.01388243769348E-06  
4.90869609284676E-06  
4.90869609284676E-06  
4.69004593280905E-06  
0.0000046589173093612  
4.50927328443525E-06  
4.49963808510953E-06  
4.27146171162528E-06  
4.22010145056365E-06  
4.16996163134903E-06  
4.16172060045704E-06  
4.14533587368358E-06  
4.11295043717043E-06  
4.10493298992449E-06  
0.0000040613898241683  
4.02644478744027E-06  
4.02644478744027E-06  
4.02259909041311E-06  
4.01110595015478E-06  
4.00728948397957E-06  
4.00728948397957E-06  
4.00728948397957E-06  
4.00728948397957E-06  
3.96578271907959E-06  
3.90692138002089E-06  
3.89968634042826E-06  
3.89247804774725E-06  
3.88529635393222E-06  
3.88529635393222E-06  
3.83575705615895E-06  
3.81491055041895E-06  
3.72713384748896E-06  
3.72054880535558E-06  
0.0000036559559441515  
3.26485368035854E-06

3.17621511890085E-06  
3.16190784359048E-06  
3.14772888465061E-06  
3.11974907234261E-06  
2.56183774188718E-06  
2.01707914160082E-06  
2.00364474198978E-06  
2.00364474198978E-06  
2.00364474198978E-06  
1.97175152044125E-06  
0.0262490517530054  
0.024502323086024  
0.0154992371679793  
0.0110797265269075  
0.005583639986  
0.004828327708  
0.003536465437  
0.0033029497346492  
0.00317092549109561  
0.0030690431232126  
0.002464141808404  
0.00221737203890158  
0.0021385505644097  
0.00193656598625418  
0.0018105040936091  
0.001755363485  
0.00170278760397269  
0.001270177866976  
0.0011740484965889  
0.001116793635  
0.001055185572321  
0.0010335761074412  
0.000910598204906  
0.0009104865891914  
0.000846831832747263  
0.0008186392578256  
0.000809465317559795  
0.0007864347236861  
0.0007744589629684  
0.0007188052019932  
0.0007129939659074  
0.0007059693948147  
0.00070008631652452  
0.0006780034574356

0.0006373013334612  
0.000636769043  
0.000594844582668  
0.0005710507993613  
0.000569561749037  
0.000566851896424745  
0.0005490873070781  
0.0005252139459008  
0.00050106826501423  
0.000483977016418986  
0.0004816555325247  
0.000481315826  
0.0004671339776635  
0.0004630141616442  
0.0004437521910263  
0.000440281988164  
0.0004108085964936  
0.0004059602839061  
0.000374527003  
0.0003657278272777  
0.0003594026009966  
0.0003583517161983  
0.0003578321776464  
0.000334007025503698  
0.0003327801861079  
0.0003232363015252  
0.0003214169602408  
0.000319324445  
0.0003092332848526  
0.0002951344275545  
0.000287117809810658  
0.000285103024828994  
0.0002735076397521  
0.0002704459870683  
0.0002635619073975  
0.0002343385159915  
0.000234158462807212  
0.0002097636903444  
0.0001946764088731  
0.0001916813871981  
0.0001827016799938  
0.000176096587367989  
0.0001715897834619  
0.0001680879511463

0.0001677212137984  
0.0001635579212573  
0.0001599283418674  
0.000159599521  
0.0001586252220448  
0.0001568820877366  
0.0001546166424263  
0.000152791095794944  
0.0001486251357504  
0.0001393837010275  
0.0001383197033097  
0.000135729422  
0.0001352229935341  
0.0001317809536987  
0.0001295599263892  
0.000127412524294311  
0.0001267124554795  
0.0001235446440925  
0.000120640685587011  
0.0001203479029212  
0.0001198008669988  
0.0001193668058865  
0.000118212243957547  
0.0001180832918447  
0.0001147917715146  
0.0001101847438952  
0.0001078207802989  
0.0001020427738817  
0.0001019801017445  
0.0001010590135726  
0.0001004428000752  
0.0000994037366262212  
0.0000987123248679864  
0.0000976155212583421  
0.0000975352453362547  
0.0000964250880722648  
0.0000958406935990996  
0.0000958406935990996  
0.0000953677954398935  
0.0000939056677188327  
0.0000936831424398781  
0.0000910546790632149  
0.0000908264718475176  
0.0000901237525295484

0.000089260498  
0.0000873547988533459  
0.000087272154767392  
0.000085695706885033  
0.0000853503586131877  
0.0000850199701282334  
0.0000838606068992121  
0.0000834869589709505  
0.0000834056668979505  
0.0000832551151526474  
0.0000827609854146814  
0.0000818515240364981  
0.0000815786856230431  
0.0000813462677152851  
0.0000803542400602207  
0.0000791261184872478  
0.0000779461476924853  
0.0000771293207267001  
0.0000758330296220497  
0.0000745367385173992  
0.0000740342436509898  
0.0000738538483204562  
0.0000716200835319358  
0.0000711048311324255  
0.0000705969394814796  
0.0000688750629087605  
0.0000676956953931996  
0.0000664601351506724  
0.0000660004776454567  
0.000065399977021718  
0.0000650846666903574  
0.0000650770141722281  
0.0000644405641558738  
0.0000638473612881598  
0.0000633562277397894  
0.0000621608272163971  
0.0000616952030424915  
0.0000610097007864638  
0.0000610097007864638  
0.0000601190482202381  
0.0000599004334994372  
0.0000599004334994372  
0.0000599004334994372  
0.0000599004334994372



0.0000596834029432798  
0.0000595908705356158  
0.0000593607899543972  
0.0000592844907385175  
0.0000577986639029657  
0.0000575965706725358  
0.0000573958857573004  
0.0000563854936363895  
0.0000561566564057224  
    0.000055582457  
0.0000554973388471049  
0.0000554633643513307  
    0.000055215483393336  
    0.000054778306169319  
0.0000546808936509385  
0.0000505553530813664  
0.0000491719976487917  
0.0000489892021184988  
    0.000048627658191425  
0.0000480952385761904  
0.0000480952385761904  
0.0000478855209661198  
    0.000047517170804842  
    0.000047517170804842  
    0.000046841571219939  
0.0000464952961638777  
0.0000449545163689733  
0.0000448234536390346  
    0.000044587540725145  
0.0000437326173779077  
0.0000426751793065938  
0.0000426278500873998  
0.0000422374851598596  
0.0000421294609011387  
0.0000417028334489752  
0.0000417028334489752  
0.0000411173022461035  
0.0000407990568726817  
0.0000405064406860948  
    0.000040107246777884  
0.0000400144596251301  
0.0000395568900467981  
0.0000387591040290476  
0.0000385324426019771

0.0000378680901433224  
0.0000372262581069948  
0.0000360714289321428  
0.0000359402600996623  
0.0000350481259837132  
0.0000349242810155729  
0.0000349130657679764  
0.0000338478476965998  
0.000033617590229276  
0.000033617590229276  
0.000033617590229276  
0.000033617590229276  
0.0000328357858053393  
0.0000323445538531323  
0.0000322992533575396  
0.0000305048503932319  
0.0000304484643481427  
0.0000300869757303109  
0.0000299502167497186  
0.000029503198589275  
0.0000294153914506164  
0.0000288150773393794  
0.0000286481688010957  
0.0000263561907397523  
0.0000261470146227702  
0.0000259411326178665  
0.0000257384675192894  
0.0000256716143569016  
0.0000256051075839563  
0.0000253424910959157  
0.0000253181467240656  
0.0000249585139580988  
0.0000248956461647535  
0.0000248643308865588  
0.0000248643308865588  
0.0000248643308865588  
0.0000248643308865588  
0.0000246780812169966  
0.0000246780812169966  
0.0000245859988243958  
0.0000240476192880952  
0.0000239601733997748  
0.0000238733611773119  
0.0000238733611773119

0.0000238158350058003  
0.0000237016103774751  
0.000023448568273801  
0.0000232008721300637  
0.0000228786377949239  
0.0000226427755496154  
0.0000219634922831269  
0.0000219634922831269  
0.000021818038691848  
0.000021818038691848  
0.000021818038691848  
0.0000208514167244876  
0.0000204628810091245  
0.0000204628810091245  
0.0000203995284363408  
0.0000203365669288212  
0.000019966811166479  
0.0000198465291715002  
0.0000192662213009885  
0.0000192662213009885  
0.0000188978423086178  
0.0000188797927935189  
0.0000188258505283945  
0.0000188258505283945  
0.0000188079382062933  
0.0000186131290534974  
0.0000185085609127474  
0.0000183029102359391  
0.0000182690786088856  
0.0000180357144660714  
0.0000180028625271532  
0.0000180028625271532  
0.0000178082369863191  
0.0000178082369863191  
0.0000177124937767153  
0.0000174313430818468  
0.0000171144095712677  
0.000016808795114638  
0.0000167802572621513  
0.000016597097443169  
0.0000163906658829305  
0.000016165475183852  
0.0000161496266787698  
0.0000156882087736621

0.0000156882087736621  
0.0000156732818385777  
0.000015613857073313  
0.0000154310250232742  
0.0000153590855126762  
0.0000153233667091583  
0.0000149751083748593  
0.0000149751083748593  
0.0000143865669976814  
0.0000142005338037458  
0.0000142005338037458  
0.0000140791617199532  
0.0000140791617199532  
0.000013959846790123  
0.000013959846790123  
0.0000135021468953649  
0.0000135021468953649  
0.0000132843703325364  
0.0000129705663089332  
0.0000129197013430158  
0.0000129197013430158  
0.0000129197013430158  
0.0000129197013430158  
0.0000128692337596447  
0.0000126712455479578  
0.0000126226967144407  
0.0000125745642790041  
0.0000125267066253575  
0.0000123854279792069  
0.0000123390406084983  
0.0000123390406084983  
0.0000122019401572927  
0.0000121569145478562  
0.000012067852902817  
0.0000120238096440476  
0.0000119366805886559  
0.0000119366805886559  
0.0000119366805886559  
0.0000118935878789496  
0.0000118935878789496  
0.0000118508051887375  
0.0000117661565802466  
0.0000117661565802466  
0.0000117661565802466

0.0000117242841369005  
0.0000117242841369005  
0.0000116827086612377  
0.0000116620313007753  
0.0000116004360650318  
0.0000115597327805931  
0.0000115597327805931  
0.0000115597327805931  
0.0000115193141345071  
0.0000115193141345071  
0.0000115193141345071  
    0.00001147917715146  
    0.00001147917715146  
    0.00001147917715146  
    0.00001147917715146  
    0.00001147917715146  
    0.00001147917715146  
    0.00001147917715146  
0.0000114393188974619  
0.0000114393188974619  
0.0000113800478150917  
0.0000113213877748077  
0.0000113213877748077  
0.0000112826158988666  
0.0000112826158988666  
0.0000112826158988666  
0.0000112154734260681  
0.0000112058634097586  
0.0000110926728702661  
0.0000110184743895285  
0.0000110184743895285  
0.0000109817461415634  
0.0000109817461415634  
0.0000109817461415634  
0.0000109452619351131  
    0.000010909019345924  
    0.000010837249481806  
0.0000108017175162919  
0.0000107313480210718  
0.0000106274962660291  
    0.000010593324252312  
0.0000105593712899649  
0.0000104921141479906  
0.0000104921141479906

0.0000103601378693995  
0.0000101369964383663  
0.0000097471119599676  
  9.63311065049429E-06  
  9.61436919008477E-06  
  9.57710419322397E-06  
0.0000094670225358306  
  9.41292526419728E-06  
  9.40396910314666E-06  
  9.40396910314666E-06  
  9.33292873220693E-06  
  9.32412408245957E-06  
  9.10089459245593E-06  
0.000008808887279329  
0.0000087156715409234  
0.0000087156715409234  
  8.62440796457866E-06  
  8.62440796457866E-06  
  8.62440796457866E-06  
  8.62440796457866E-06  
  8.62440796457866E-06  
  8.62440796457866E-06  
  8.62440796457866E-06  
  8.60188992811762E-06  
  8.60188992811762E-06  
  8.60188992811762E-06  
  8.60188992811762E-06  
  8.60188992811762E-06  
  8.57948917309648E-06  
  8.57948917309648E-06  
  8.57948917309648E-06  
  8.53503586131877E-06  
  8.53503586131877E-06  
  8.53503586131877E-06  
  8.51298150508798E-06  
  8.51298150508798E-06  
  8.49104083110579E-06  
  8.46921296264536E-06  
0.000008404397557319  
  8.36173564078438E-06  
0.0000082985487215845  
0.0000082776980966559  
0.0000082776980966559  
  8.21577018072081E-06  
  8.11459074499765E-06

7.91952846747367E-06  
7.90053679249172E-06  
7.84410438683106E-06  
7.84410438683106E-06  
7.57361802866447E-06  
7.10026690187294E-06  
7.05465490892729E-06  
6.97992339506154E-06  
6.82096033637484E-06  
6.80686744311786E-06  
6.79283266488463E-06  
6.69618667168505E-06  
6.68260414293924E-06  
6.60225218931673E-06  
6.52380958904762E-06  
6.51091668472144E-06  
6.43461687982235E-06  
6.42207376699619E-06  
6.40957946005651E-06  
6.36008463797113E-06  
6.29928076953928E-06  
6.26931273543111E-06  
6.26931273543111E-06  
6.26931273543111E-06  
6.26931273543111E-06  
6.10097007864638E-06  
6.08969286962855E-06  
6.08969286962855E-06  
6.07845727392813E-06  
6.07845727392813E-06  
6.07845727392813E-06  
6.01190482202381E-06  
6.00095417571775E-06  
5.97917212789301E-06  
5.84135433061888E-06  
5.77986639029657E-06  
5.71965944873098E-06  
5.14769350385788E-06  
0.0000048807760629171  
4.71319576891137E-06  
4.69974870537667E-06  
4.67972136714353E-06  
3.21416960240882E-06  
3.19856683734859E-06

3.18619327124666E-06  
3.17697574008587E-06  
3.15567417861019E-06  
3.13465636771555E-06  
3.12573419589093E-06  
0.006062095022  
0.004896225154  
0.0045761687161567  
0.0040754947669515  
0.0039000349109921  
0.00346139931  
0.00338546835092394  
0.0025731664364199  
0.002572198664818  
0.0019556459498572  
0.0018484334422732  
0.00146969244027729  
0.0013663694072739  
0.00105181408066136  
0.0010147526957257  
0.000963255255  
0.0009247972187631  
0.0008442914018614  
0.0008369270780395  
0.00083463040292286  
0.0008253607576839  
0.00081021726  
0.0008098174511782  
0.000786361133683782  
0.000768715445173  
0.0006864818731678  
0.000678302344891182  
0.000634879773  
0.0006161444807577  
0.000608788823332848  
0.0006021770817261  
0.000595667059221  
0.0005559447268976  
0.0005377388928616  
0.0005314823060843  
0.000510744181  
0.0005060062947183  
0.0004923057632728  
0.000447686758496407



0.0004216719122652  
0.000414779198314671  
0.0004018822557329  
0.000368962923232053  
0.0003610423292044  
0.000315457325  
0.0003123814370454  
0.0002988999277013  
0.000296292659264705  
0.000295342449570116  
0.0002925928819092  
0.0002867369003403  
0.000275824785858501  
0.0002645842773439  
0.000255793623249076  
0.0002539651365126  
0.0002501604153663  
0.000246274340248529  
0.0002415464010636  
0.0002391670377379  
0.0002230676604578  
0.0002200869215547  
0.000216732593  
0.0002149061483359  
0.000205887765  
0.0002052007093788  
0.0001967802257237  
0.000188503416465702  
0.0001869202357354  
0.0001771969608845  
0.0001765357781946  
0.0001582768504806  
0.0001518018884154  
0.0001485605669546  
0.000145382405572  
0.0001411684228018  
0.0001391517310475  
0.0001355035583234  
0.00012964446992  
0.0001259809910718  
0.0001250802076831  
0.000117743772424836  
0.000117226107278734  
0.0001159597758729

0.0001105176203265  
0.0001030753563315  
0.000098611463  
0.0000962036659094064  
0.0000946610415289348  
0.0000923281627803544  
0.0000854440453800648  
0.0000851949373760413  
0.0000848486164923989  
0.000080961007154929  
0.000079677882808404  
0.0000795152748843053  
0.0000791043432311564  
0.0000782950916379988  
0.0000780290080640378  
0.0000749278551794415  
0.0000732377531829127  
0.0000723910739553646  
0.0000721527494320548  
0.0000698669779318163  
0.0000678788931939191  
0.0000668998706959299  
0.0000662627290702544  
0.000065100225051478  
0.0000645341361379869  
0.0000641252216808913  
0.0000628934377615974  
0.0000628934377615974  
0.0000625401038415884  
0.0000617205258678579  
0.0000615035275348217  
0.0000607649480556918  
0.0000605007526293627  
0.0000602823383599426  
0.0000538651862119487  
0.0000535198965567439  
0.0000526757341504861  
0.0000515376781657534  
0.0000506006294718306  
0.0000506006294718306  
0.0000504172938578022  
0.0000503716673475237  
0.0000496970468026908  
0.0000489478450920974

0.0000488251687886085  
0.0000485413015282096  
0.0000473996164152184  
0.0000473996164152184  
0.0000461914459908827  
0.0000457116797644073  
0.0000457067729718178  
0.0000434849159523544  
0.0000430810312840663  
0.0000430736226802341  
0.0000427747876418933  
0.0000421671912265255  
0.0000421671912265255  
0.000042008069750199  
0.000042008069750199  
0.0000419854360919284  
0.0000412301425326027  
0.00004112859  
0.0000406282426416158  
0.0000406282426416158  
0.0000404805035774645  
0.0000403338350862418  
0.0000403338350862418  
0.0000403338350862418  
0.000040188225573295  
0.0000394921440368628  
0.0000390601350308868  
0.0000387879389679538  
0.000038386684426906  
0.0000375361124213001  
0.0000372312323873001  
0.0000369838487833978  
0.0000368126272612524  
0.0000360496712558378  
0.0000352282863411479  
0.0000352282863411479  
0.0000348501651997402  
0.0000347336614159211  
0.0000345718586453501  
0.0000345289655204799  
0.0000340224281289814  
0.0000338362871848107  
0.0000334155100285674  
0.000032550112525739

0.0000324363009434811  
0.0000319898393107229  
0.0000319889036890883  
0.0000312700519207942  
0.0000308654486611905  
0.0000303603776830983  
0.0000300868607670344  
0.0000300868607670344  
0.0000299251034510826  
0.0000296857026234739  
0.0000288397370046703  
0.0000286173225804697  
0.0000284709424138177  
0.0000280171270565505  
0.0000279000964506334  
0.0000278303462095068  
0.0000278303462095068  
0.0000274641574435922  
0.0000271515572775676  
0.0000265050916281017  
0.0000257688390828767  
0.0000254158412872208  
0.0000253003147359153  
0.0000249226980980658  
0.0000246286249641653  
0.0000246286249641653  
0.000024200301051745  
0.000024200301051745  
0.0000237190450649206  
0.0000228117591881203  
0.0000226724738491253  
0.0000222642769676054  
0.0000220875763567514  
0.0000218491432459327  
0.0000215739117903153  
0.0000213259357927255  
0.0000209447572602121  
0.0000207689150817215  
0.0000203636679581757  
0.0000203179332040344  
0.0000202402517887322  
0.0000202402517887322  
0.0000201669175431209  
0.0000198798329982701

0.0000198788187210763  
0.0000197378341911396  
0.0000195300675154434  
0.0000195300675154434  
0.0000194617805660887  
0.0000193939694839769  
0.0000192597551622884  
0.0000191603639622271  
0.0000191273857110012  
0.0000190618809654156  
0.0000190618809654156  
0.0000189875656400144  
0.0000189322083057869  
0.000018678084704367  
0.00001861561619365  
0.0000185535641396712  
0.0000185359108912034  
0.0000184919243916989  
0.000018430692853978  
0.0000182494073504962  
0.0000181897687643835  
0.0000178399655189146  
0.0000175033623959162  
0.0000173939663809417  
0.0000173939663809417  
0.000017285929322675  
0.000017285929322675  
0.000017285929322675  
0.000017285929322675  
0.0000171792260552511  
0.0000171792260552511  
0.0000167652688009077  
0.0000165656822675636  
0.0000162750562628695  
0.000015903054976861  
0.000015903054976861  
0.0000157233594403993  
0.0000156130974527387  
0.0000154042506694687  
0.0000146475506365825  
0.0000145708618897941  
0.0000145328178639722  
0.0000144198685023351  
0.0000142354712069088

0.0000138115862081919  
0.0000137433808442009  
0.0000137095301524664  
0.0000132525458140508  
0.0000132525458140508  
0.0000132210670829011  
0.0000131897375400506  
0.0000129443470741892  
0.0000128844195414383  
0.0000128844195414383  
0.0000127955614756353  
0.0000127079206436104  
0.0000126501573679576  
0.0000126501573679576  
0.000012126512509589  
0.0000119958388834081  
0.0000118933103459431  
0.000011267346643525  
0.0000111768458672718  
0.0000111321384838027  
0.0000111321384838027  
0.0000109138612586301  
0.0000109138612586301  
0.0000109138612586301  
0.0000109138612586301  
0.0000107039793113487  
0.0000107039793113487  
0.0000106629678963627  
0.0000106425798124309  
0.0000106425798124309  
0.0000106324149797542  
0.0000105919490806876  
0.0000105417978066313  
0.0000105020174375497  
0.0000104233506402647  
0.0000104233506402647  
0.0000103458536094821  
0.0000103075356331506  
0.0000102884828870635  
0.0000102884828870635  
0.0000102884828870635  
0.0000102695004463124  
0.0000102317449299657  
0.0000102317449299657

0.0000101201258943661  
0.0000101201258943661  
0.0000101201258943661  
0.0000101201258943661  
0.0000101201258943661  
0.0000100834587715604  
0.0000100470563933237  
0.0000100109159027003  
9.97503448369421E-06  
9.93940936053816E-06  
0.0000098689170955698  
0.0000098689170955698  
9.83404459699888E-06  
9.69698474198845E-06  
9.69698474198845E-06  
9.69698474198845E-06  
9.69698474198845E-06  
9.69698474198845E-06  
9.69698474198845E-06  
9.66331465607876E-06  
0.0000094984116755996  
9.46610415289348E-06  
9.40214398969826E-06  
9.37048693922789E-06  
9.37048693922789E-06  
9.30780809682503E-06  
0.0000091849327424115  
0.0000091849327424115  
9.15471914786409E-06  
9.15471914786409E-06  
9.09488438219178E-06  
9.06525935163089E-06  
9.06525935163089E-06  
8.97753103532479E-06  
8.89148441198302E-06  
0.000008536916  
8.16139185029526E-06  
8.09021692136827E-06  
0.000008020272682855  
7.94396181051575E-06  
7.94396181051575E-06  
7.94396181051575E-06  
7.90634835497353E-06  
7.90634835497353E-06

7.68794094185272E-06  
7.36252545225048E-06  
7.36252545225048E-06  
7.36252545225048E-06  
7.36252545225048E-06  
7.34309926372212E-06  
7.28543094489708E-06  
7.28543094489708E-06  
7.26640893198612E-06  
7.26640893198612E-06  
7.24748599205907E-06  
7.24748599205907E-06  
7.24748599205907E-06  
7.15433064511744E-06  
7.09957811467011E-06  
7.09957811467011E-06  
7.09957811467011E-06  
7.09957811467011E-06  
7.06353964708295E-06  
7.06353964708295E-06  
7.04565726822958E-06  
7.01016277317552E-06  
6.99254929887106E-06  
6.97502411265835E-06  
6.92297169390717E-06  
6.80448562579629E-06  
6.62627290702544E-06  
6.61053354145055E-06  
0.0000065176454823201  
6.48726018869623E-06  
6.29645841844046E-06  
6.26809599313217E-06  
6.05007526293627E-06  
5.89625979014975E-06  
5.82224816098469E-06  
5.72640868508371E-06  
5.64510065101558E-06  
5.64510065101558E-06  
0.0000054356144940443  
5.42501875428983E-06  
5.42501875428983E-06  
5.41446424309471E-06  
5.31620748987714E-06  
5.30101832562035E-06



5.29597454034383E-06  
5.29597454034383E-06  
5.24111981346645E-06  
0.0000051633295379419  
5.15376781657534E-06  
5.13475022315624E-06  
5.13475022315624E-06  
5.07853033020198E-06  
4.72501633438146E-06  
4.28818893829073E-06  
4.26192131845434E-06  
4.17873066208811E-06  
4.15999195956754E-06  
3.97009218395247E-06  
3.90327436318469E-06  
0.0000032136658440539  
0.0000032136658440539  
3.15894962650475E-06  
3.14467188807987E-06  
2.71515572775676E-06  
2.70197536014629E-06  
2.66574197409069E-06  
2.64798727017191E-06  
2.64798727017191E-06  
2.64798727017191E-06  
2.64798727017191E-06  
2.64798727017191E-06  
2.62798358918856E-06  
2.60583766006618E-06  
0.0199272779964764  
0.0179906772289908  
0.0124927421098815  
0.00573318274855665  
0.0046401298987237  
0.004492105105  
0.0040027685721059  
0.0033641120970544  
0.003356949642  
0.002656104558  
0.0022380581793396  
0.00199631289212846  
0.00198574685961105  
0.00194456888731373  
0.0017310762966874

0.0016710009220095  
0.00159468518921  
0.00145736679196006  
0.0014446482100245  
0.0011830389252382  
0.0011055736583243  
0.001032399707  
0.000953410942207028  
0.0008732839281377  
0.000865961733  
0.0008340357185707  
0.000830854662178  
0.0008293199775221  
0.0007712977361856  
0.0006486219539185  
0.0006160662690164  
0.0005808450113535  
0.0005784282298096  
0.0005711153248713  
0.0005638251345485  
0.0005548904576875  
0.000530752739  
0.0005178977605083  
0.0004706906618692  
0.000467321807333684  
0.0004593417181622  
0.0004572131112032  
0.0004476116358679  
0.00044391236615  
0.0004327874229885  
0.000429354403571864  
0.000428637292  
0.0004131630212926  
0.000399744763  
0.000396959295  
0.000386761206107  
0.000385536026868357  
0.0003774995186881  
0.0003655918900909  
0.0003483143905592  
0.000336606343817786  
0.0003236861003177  
0.0003158981640694  
0.0003096127916082

0.00030720664080289  
0.0003062278121081  
0.0003031346018848  
0.0002903857712338  
0.000286504664887496  
0.0002804446367231  
0.0002750860007073  
0.0002531194623337  
0.0002478978127755  
0.0002406514171332  
0.000231270290171332  
0.0002213208123219  
0.0002093359307882  
0.0002000307361514  
0.000198141255161898  
0.000198079886938897  
0.0001978081724163  
0.0001972799796996  
0.000196035313  
0.0001943155722613  
0.00019074359483  
0.0001900238076797  
0.000189780095881668  
0.0001842655104773  
0.00017756494646  
0.0001480398049427  
0.0001480398049427  
0.0001456587451429  
0.0001431754390823  
0.0001414006571713  
0.0001311362214456  
0.0001276248052681  
0.0001271623965533  
0.0001220759006912  
0.000120153446  
0.0001192147467688  
0.000113735311203  
0.0001128342391952  
0.0001109780915375  
0.000108996339902906  
0.0001085402882715  
0.000107125887892091  
0.0001054803289382  
0.0001028729500207

0.0001024890957295  
0.0000996846479275179  
0.000097720856  
0.0000943313778068787  
0.0000938285644471618  
0.0000930456560146759  
0.0000880355053061933  
0.0000873530595286259  
0.0000822170667371058  
0.0000779681847480642  
0.000077684664076253  
0.0000774362056623631  
0.0000774031979020637  
0.0000769127398508409  
0.0000747885462102485  
0.0000726642266019373  
0.0000718743980519163  
0.0000708875951446773  
0.0000707393464270516  
0.0000707146985711537  
0.0000704284042449547  
0.0000698146490881359  
0.0000697576575378598  
0.000069678025508707  
0.0000691196301823306  
0.0000687927719059325  
0.0000684148566252159  
0.0000673212687635596  
0.000066124446207763  
0.0000650878617429676  
0.0000635811982766952  
0.0000630315049198361  
0.0000627102229578363  
0.000062399391617277  
0.0000610379503456274  
0.0000608167983516215  
0.0000607678709193193  
0.000060234819420027  
0.000060234819420027  
0.0000600092208454202  
0.0000579933019910949  
0.00005736649468574  
0.0000573333348622222  
0.0000568676556015162

0.0000565166206903957  
0.0000561698929560988  
0.0000561385830938044  
0.000055657705482335  
0.0000556013717723326  
0.0000554890457687521  
0.0000546375514602802  
0.0000545508251881211  
0.0000535915460520758  
0.0000533548517007232  
0.0000519787898320428  
0.0000513787460821779  
0.0000512592606261728  
0.0000506238924667525  
0.0000499401411918769  
0.0000499401411918769  
0.0000497307485663345  
0.0000492241535045382  
0.0000492241535045382  
0.0000489810712650096  
0.000048807392091988  
0.0000474388215121456  
0.0000471286344488358  
0.0000470971839086631  
0.0000468321869659545  
0.0000462408714739601  
0.0000457303255744053  
0.0000456480397883965  
0.0000446619148870444  
0.0000446183847555755  
0.0000445532484274652  
0.000044467832  
0.000044399734171781  
0.0000443589755418803  
0.0000443221631140448  
0.0000442303988011792  
0.0000436786189906334  
0.0000434949764933212  
0.0000434466246860364  
0.0000433129560312858  
0.0000431058971367425  
0.0000428637291753001  
0.0000422806960832431  
0.000041401710505755

0.0000412418583416401  
0.0000408280604318577  
0.0000396923087507692  
0.0000395323512601213  
0.0000388423320381265  
0.0000388423320381265  
0.0000385618819873097  
0.0000383886480161178  
0.0000381487189660171  
0.0000376777471269305  
0.0000374925984924001  
0.0000374374082100266  
0.0000372182624058703  
0.0000366814605442472  
0.0000357086292973639  
0.0000356947078044604  
0.0000355791161341092  
0.0000351369779950157  
0.0000346806536054701  
0.0000338472922434163  
0.0000337226245003466  
0.0000334149363205989  
0.0000327201488207554  
0.0000323522705012159  
0.0000319013677764603  
0.0000319013677764603  
0.000031221457977303  
0.0000311418114008303  
0.0000305189751728137  
0.0000299205638949153  
0.0000299205638949153  
0.0000298474084819693  
0.0000284338278007581  
0.0000282583103451978  
0.000027744522884376  
0.0000276189820568449  
0.0000275773872043497  
0.0000275442014195069  
0.0000272490849757265  
0.0000270558290539128  
0.0000267710308533453  
0.0000258174047956945  
0.0000255745602006818  
0.000025432479310678

0.0000252837513614928  
0.0000250978414250112  
0.0000244151801382509  
0.0000236948565006317  
0.0000236214978117753  
0.0000236214978117753  
0.0000235971457521755  
0.0000233861878718878  
0.0000230042526428244  
0.0000230042526428244  
0.00002286065556016  
0.0000225648614956108  
0.0000225509668764633  
0.0000224404229211865  
0.0000222766242137326  
0.0000221956183075008  
0.0000221956183075008  
0.0000220353611356055  
0.0000218617300664854  
0.0000214168246826762  
0.0000212675785176402  
0.0000211937327588984  
0.0000210475690846991  
0.0000203266247582964  
0.0000202783888191453  
0.0000202559569731064  
0.0000201445380678638  
0.0000197078252960974  
0.0000194636321255189  
0.0000194388376896902  
0.0000184484305880566  
0.0000183407302721236  
0.0000182748354328225  
0.0000177435902167521  
0.0000176071010612386  
0.0000175396409039159  
0.000017274891607253  
0.000017274891607253  
0.000017242358854697  
0.00001714549167012  
0.0000170497068004545  
0.0000168924216823692  
0.0000167074681602994  
0.0000166467137306256

0.0000165863995504422  
0.0000165863995504422  
0.0000165863995504422  
0.000016124338467865  
0.0000160626185120072  
0.0000160064555102169  
0.0000159229435684245  
0.0000158402985326022  
0.0000155709057004151  
0.0000155709057004151  
0.0000154761537387493  
0.0000153963826346929  
0.0000152290295273521  
0.0000152087916143589  
0.0000149812641100768  
0.0000145328453203874  
0.0000141291551725989  
0.0000139228901335828  
0.0000131547306779369  
0.0000130982726063578  
0.0000125077767101695  
0.0000123558603938517  
0.000011983890774665  
0.0000119682255579661  
0.0000119682255579661  
0.0000119682255579661  
0.0000119526012426163  
0.0000119526012426163  
0.0000119214746768803  
0.0000117833880976114  
0.0000117682423545554  
0.0000117380673741591  
0.0000116707362037528  
0.00001156021786849  
0.0000115274693759447  
0.0000115165944048353  
0.0000115165944048353  
0.000011473298937148  
0.00001143032778008  
0.00001143032778008  
0.00001143032778008  
0.0000114160755010525  
0.000011345343930414  
0.0000112616144549128



0.0000110776679393153  
0.0000109780486233142  
0.0000109780486233142  
0.0000108996339902906  
0.0000108996339902906  
0.0000108377042517094  
0.0000106709703401446  
0.0000104876203343002  
0.000010451703826306  
0.0000103279399491141  
0.0000102412668365146  
0.0000101729917242712  
0.0000101633123791482  
0.0000101056209181502  
9.65790353570054E-06  
9.65790353570054E-06  
0.0000094779426002527  
9.19246240144991E-06  
8.97616916847461E-06  
8.92367695111511E-06  
8.71970719223248E-06  
8.71141061069848E-06  
0.0000086211794273485  
8.57274583506003E-06  
0.0000083385178067797  
8.24837166832802E-06  
8.24837166832802E-06  
8.24837166832802E-06  
8.24837166832802E-06  
8.11674871617385E-06  
8.09521887873042E-06  
0.0000080313092560036  
7.96840082841088E-06  
7.96840082841088E-06  
0.0000079476497845869  
0.0000079476497845869  
7.88604009633429E-06  
7.86571525072518E-06  
7.78545285020757E-06  
7.72632282856043E-06  
7.62974379320342E-06  
7.62974379320342E-06  
7.61071700070167E-06  
0.0000075169889588211

7.48014097372884E-06  
7.48014097372884E-06  
7.26642266019373E-06  
7.26642266019373E-06  
7.26642266019373E-06  
7.23198463810751E-06  
7.23198463810751E-06  
7.16407867906424E-06  
7.01585636156636E-06  
6.93613072109402E-06  
6.93613072109402E-06  
6.93613072109402E-06  
6.93613072109402E-06  
6.75986915743984E-06  
6.75198565770214E-06  
6.66353169712089E-06  
6.64901419887008E-06  
6.57736533896847E-06  
6.46588457051137E-06  
6.38472283950077E-06  
6.25388835508477E-06  
6.22836228016606E-06  
6.19046149549973E-06  
6.17793019692585E-06  
6.11602708874022E-06  
6.10379503456274E-06  
5.98411277898307E-06  
5.98411277898307E-06  
5.98411277898307E-06  
5.96073733844017E-06  
0.0000059375438079404  
0.0000059375438079404  
5.89169404880573E-06  
5.84654696797197E-06  
5.81313812815499E-06  
5.80208653475545E-06  
5.80208653475545E-06  
5.80208653475545E-06  
5.78010893424501E-06  
5.78010893424501E-06  
5.78010893424501E-06  
5.75829720241767E-06  
5.71516389004001E-06  
5.71516389004001E-06

5.71516389004001E-06  
5.71516389004001E-06  
5.69383865164434E-06  
5.69383865164434E-06  
5.65166206903957E-06  
5.61010573029663E-06  
5.61010573029663E-06  
5.56915605343315E-06  
5.54890457687521E-06  
0.0000055287998501474  
0.0000055287998501474  
5.50884028390139E-06  
0.0000054498169951453  
5.41116581078257E-06  
5.41116581078257E-06  
5.41116581078257E-06  
5.37305900929818E-06  
5.35420617066907E-06  
5.33548517007232E-06  
5.33548517007232E-06  
5.31689462941005E-06  
5.31689462941005E-06  
5.31689462941005E-06  
5.31689462941005E-06  
5.31689462941005E-06  
5.31689462941005E-06  
0.0000052984331897246  
0.0000052984331897246  
0.0000052984331897246  
5.28009951086742E-06  
5.28009951086742E-06  
5.28009951086742E-06  
5.26189227117477E-06  
5.24381016715012E-06  
5.22585191315303E-06  
5.22585191315303E-06  
0.0000051727076564091  
0.0000051727076564091  
5.15523229270501E-06  
5.15523229270501E-06  
5.10350755398222E-06  
5.10350755398222E-06  
5.08649586213561E-06  
5.08649586213561E-06

5.06959720478632E-06  
5.06959720478632E-06  
5.06959720478632E-06  
5.05281045907511E-06  
5.05281045907511E-06  
5.03613451696595E-06  
5.00311068406782E-06  
5.00311068406782E-06  
4.98676064915256E-06  
4.97051712912275E-06  
4.97051712912275E-06  
4.95437908649573E-06  
4.95437908649573E-06  
4.93834549721904E-06  
4.70971839086631E-06  
4.66650996526203E-06  
4.61011709559119E-06  
0.0000045280378594679  
4.50575420858469E-06  
4.44883020011861E-06  
4.44451094749714E-06  
4.43589755418803E-06  
4.43589755418803E-06  
4.41450942711866E-06  
4.37234601329709E-06  
4.37234601329709E-06  
4.35985359611624E-06  
4.35985359611624E-06  
4.35985359611624E-06  
4.35570530534924E-06  
4.33508170068376E-06  
4.13536248954115E-06  
4.11306943029834E-06  
4.03690147788541E-06  
4.03690147788541E-06  
4.03690147788541E-06  
4.03690147788541E-06  
4.03690147788541E-06  
3.99463025822168E-06  
3.99463025822168E-06  
3.99463025822168E-06  
3.99463025822168E-06  
3.99463025822168E-06  
3.99463025822168E-06

3.98420041420544E-06  
3.98420041420544E-06  
3.98420041420544E-06  
3.98420041420544E-06  
3.98420041420544E-06  
3.97382489229345E-06  
3.97382489229345E-06  
3.97382489229345E-06  
3.96350326919658E-06  
3.94302004816714E-06  
0.0000039126891247197  
3.89272642510378E-06  
3.88282126880581E-06  
0.0000038340421071374  
0.0000038340421071374  
0.0000038340421071374  
3.81487189660171E-06  
3.78647334650294E-06  
3.74925984924001E-06  
3.73092606024617E-06  
3.15278669140637E-06  
3.12694417754238E-06  
3.09523074774986E-06  
3.09523074774986E-06  
3.09523074774986E-06  
3.05801354437011E-06  
2.99793469281077E-06  
2.98036866922008E-06  
2.97746099246962E-06  
2.92327348398598E-06  
2.91211595160436E-06  
2.90380353689949E-06  
2.90380353689949E-06  
2.90380353689949E-06  
2.88459122616386E-06  
2.83107376371184E-06  
2.82583103451978E-06  
2.82583103451978E-06  
2.82060768695135E-06  
0.0000028154036137282  
2.78966866296286E-06  
2.77950593559323E-06  
2.75940101020015E-06  
2.70558290539128E-06

2.67710308533453E-06  
2.67710308533453E-06  
2.63094613558738E-06  
2.60400812054724E-06  
2.47718954324786E-06  
2.29121435231334E-06  
2.29121435231334E-06  
1.47150314237288E-06  
1.46584895162409E-06  
1.46163674199299E-06  
1.45190176844974E-06  
1.44776922072171E-06  
0.00000142879097251

---

nt plant); inf (influent); T (treated).
