# Supplementary material for: Novel antibiotic resistance genes from the hospital effluent are disseminated into the marine environment in Norway
Source: bioRxiv or medRxiv preprint supplement (doi:10.1101/2024.09.23.24313887), 2024-09-24
Supplement: Supplementary file [file media-2.pdf]

**Supplementary Table S1:** Minimum inhibitory concentrations (MICs) of *Escherichia coli* (n= 66) at

| Strain  | Month Year | Sample   | Type   | MALDI-TOF MS      | AMP |
|---------|------------|----------|--------|-------------------|-----|
| 11-301  | Feb 23     | Hospital | Eff.   | <i>E. coli</i>    | >32 |
| 11-302  | Feb 23     | Hospital | Eff.   | <i>E. coli</i>    | >32 |
| 11-303  | Feb 23     | Hospital | Eff.   | <i>E. coli</i>    | >32 |
| 11-304  | Feb 23     | Hospital | Eff.   | <i>E. coli</i>    | >32 |
| 11-305  | Feb 23     | Hospital | Eff.   | <i>E. coli</i>    | >32 |
| 11-306  | Feb 23     | Hospital | Eff.   | <i>E. coli</i>    | >32 |
| 11-307  | Feb 23     | Hospital | Eff.   | <i>E. coli</i>    | >32 |
| 11-308  | Feb 23     | Hospital | Eff.   | <i>E. coli</i>    | >32 |
| 11-310  | Feb 23     | Hospital | Eff.   | <i>E. coli</i>    | >32 |
| 11-311  | Feb 23     | Hospital | Eff.   | <i>E. coli</i>    | >32 |
| 11-312  | Feb 23     | Hospital | Eff.   | <i>E. coli</i>    | >32 |
| 11-313  | Feb 23     | Hospital | Eff.   | <i>E. coli</i>    | >32 |
| 11-314  | Feb 23     | Hospital | Eff.   | <i>E. coli</i>    | >32 |
| 11-315  | Feb 23     | Hospital | Eff.   | <i>E. coli</i>    | >32 |
| 11-316  | Feb 23     | Hospital | Eff.   | <i>E. coli</i>    | >32 |
| 11-317  | Feb 23     | Hospital | Eff.   | <i>E. coli</i>    | >32 |
| 11-318  | Feb 23     | Hospital | Eff.   | <i>E. coli</i>    | >32 |
| 11-319  | Feb 23     | Hospital | Eff.   | <i>E. coli</i>    | >32 |
| 11-320  | Feb 23     | Hospital | Eff.   | <i>E. coli</i>    | >32 |
| 11-321  | Feb 23     | R-STP    | Inf.   | <i>E. coli</i>    | >32 |
| 11-323  | Feb 23     | R-STP    | Inf.   | <i>E. coli</i>    | >32 |
| 11-324  | Feb 23     | R-STP    | Inf.   | <i>E. coli</i>    | >32 |
| 11-325  | Feb 23     | R-STP    | Inf.   | <i>E. coli</i>    | >32 |
| 11-326  | Feb 23     | R-STP    | Inf.   | <i>E. coli</i>    | >32 |
| 11-327  | Feb 23     | R-STP    | Inf.   | <i>E. coli</i>    | >32 |
| 11-328  | Feb 23     | R-STP    | Inf.   | <i>E. coli</i>    | >32 |
| 11-329  | Feb 23     | R-STP    | Inf.   | <i>E. coli</i>    | >32 |
| 11-330  | Feb 23     | R-STP    | Inf.   | <i>E. coli</i>    | >32 |
| 11-331  | Feb 23     | R-STP    | Inf.   | <i>E. coli</i>    | >32 |
| 11-332  | Feb 23     | R-STP    | Inf.   | <i>E. coli</i>    | >32 |
| 11-333  | Feb 23     | R-STP    | Inf.   | <i>E. coli</i>    | >32 |
| 11-334  | Feb 23     | R-STP    | Inf.   | <i>E. coli</i>    | >32 |
| 11-335  | Feb 23     | R-STP    | Inf.   | <i>E. coli</i>    | >32 |
| 11-336  | Feb 23     | R-STP    | T-Eff. | <i>E. coli</i>    | >32 |
| 11-337  | Feb 23     | R-STP    | T-Eff. | <i>E. coli</i>    | >32 |
| 11-338  | Feb 23     | R-STP    | T-Eff. | <i>E. coli</i>    | >32 |
| 11-339  | Feb 23     | R-STP    | T-Eff. | <i>E. coli</i>    | >32 |
| 11-340  | Feb 23     | R-STP    | T-Eff. | <i>E. coli</i>    | >32 |
| 11-M301 | Feb 23     | R-STP    | Inf.   | <i>E. coli</i>    | >32 |
| 11-M302 | Feb 23     | R-STP    | T-Eff. | <i>E. coli</i>    | >32 |
| K10-301 | Feb 23     | Hospital | Eff.   | <i>K. oxytoca</i> | >32 |
| K10-304 | Feb 23     | Hospital | Eff.   | <i>K. oxytoca</i> | >32 |

|          |        |          |        |                      |     |
|----------|--------|----------|--------|----------------------|-----|
| K10-309  | Feb 23 | Hospital | Eff.   | <i>K. oxytoca</i>    | >32 |
| K10-311  | Feb 23 | Hospital | Eff.   | <i>K. pneumoniae</i> | >32 |
| K10-313  | Feb 23 | Hospital | Eff.   | <i>K. pneumoniae</i> | >32 |
| K10-314  | Feb 23 | Hospital | Eff.   | <i>K. oxytoca</i>    | >32 |
| K10-315  | Feb 23 | Hospital | Eff.   | <i>K. oxytoca</i>    | >32 |
| K10-316  | Feb 23 | R-STP    | Inf.   | <i>K. oxytoca</i>    | >32 |
| K10-317  | Feb 23 | R-STP    | Inf.   | <i>K. oxytoca</i>    | >32 |
| K10-318  | Feb 23 | R-STP    | T-Eff. | <i>K. oxytoca</i>    | >32 |
| K10-319  | Feb 23 | R-STP    | T-Eff. | <i>K. oxytoca</i>    | >32 |
| K10-320  | Feb 23 | R-STP    | T-Eff. | <i>K. oxytoca</i>    | >32 |
| K10-321  | Feb 23 | R-STP    | T-Eff. | <i>K. oxytoca</i>    | >32 |
| K10-T301 | Feb 23 | Hospital | Eff.   | <i>K. pneumoniae</i> | >32 |
| K10-T302 | Feb 23 | Hospital | Eff.   | <i>K. pneumoniae</i> | >32 |
| K10-T303 | Feb 23 | Hospital | Eff.   | <i>K. pneumoniae</i> | >32 |
| K10-T304 | Feb 23 | Hospital | Eff.   | <i>K. pneumoniae</i> | >32 |
| K10-T305 | Feb 23 | Hospital | Eff.   | <i>K. pneumoniae</i> | >32 |
| K10-T306 | Feb 23 | Hospital | Eff.   | <i>K. pneumoniae</i> | >32 |
| K10-T307 | Feb 23 | Hospital | Eff.   | <i>K. pneumoniae</i> | >32 |
| K10-T309 | Feb 23 | R-STP    | Inf.   | <i>K. pneumoniae</i> | 32  |
| K10-T310 | Feb 23 | R-STP    | Inf.   | <i>K. pneumoniae</i> | 32  |
| K10-M302 | Feb 23 | Hospital | Eff.   | <i>K. oxytoca</i>    | >32 |
| K10-M304 | Feb 23 | Hospital | Eff.   | <i>K. oxytoca</i>    | >32 |
| K10-M306 | Feb 23 | Hospital | Eff.   | <i>K. oxytoca</i>    | >32 |
| 12-301   | Apr 23 | R-STP    | Inf.   | <i>E. coli</i>       | >32 |
| 12-305   | Apr 23 | R-STP    | Inf.   | <i>E. coli</i>       | >32 |
| 12-306   | Apr 23 | R-STP    | Inf.   | <i>E. coli</i>       | >32 |
| 12-307   | Apr 23 | R-STP    | Inf.   | <i>E. coli</i>       | >32 |
| 12-310   | Apr 23 | R-STP    | Inf.   | <i>E. coli</i>       | >32 |
| 12-313   | Apr 23 | R-STP    | Inf.   | <i>E. coli</i>       | >32 |
| 12-316   | Apr 23 | R-STP    | T-Eff. | <i>E. coli</i>       | >32 |
| 12-317   | Apr 23 | R-STP    | T-Eff. | <i>E. coli</i>       | >32 |
| 12-318   | Apr 23 | R-STP    | T-Eff. | <i>E. coli</i>       | >32 |
| 12-319   | Apr 23 | R-STP    | T-Eff. | <i>E. coli</i>       | >32 |
| 12-327   | Apr 23 | R-STP    | T-Eff. | <i>E. coli</i>       | >32 |
| 12-328   | Apr 23 | R-STP    | T-Eff. | <i>E. coli</i>       | >32 |
| 12-329   | Apr 23 | R-STP    | T-Eff. | <i>E. coli</i>       | >32 |
| 12-330   | Apr 23 | R-STP    | T-Eff. | <i>E. coli</i>       | >32 |
| 12-331   | Apr 23 | Hospital | Eff.   | <i>E. coli</i>       | >32 |
| 12-332   | Apr 23 | Hospital | Eff.   | <i>E. coli</i>       | >32 |
| 12-333   | Apr 23 | Hospital | Eff.   | <i>E. coli</i>       | >32 |
| 12-336   | Apr 23 | Hospital | Eff.   | <i>E. coli</i>       | >32 |
| 12-337   | Apr 23 | Hospital | Eff.   | <i>E. coli</i>       | >32 |
| 12-338   | Apr 23 | Hospital | Eff.   | <i>E. coli</i>       | >32 |
| 12-340   | Apr 23 | Hospital | Eff.   | <i>E. coli</i>       | >32 |
| 12-341   | Apr 23 | Hospital | Eff.   | <i>E. coli</i>       | >32 |
| 12-342   | Apr 23 | Hospital | Eff.   | <i>E. coli</i>       | >32 |

|          |        |          |        |                      |     |
|----------|--------|----------|--------|----------------------|-----|
| 12-343   | Apr 23 | Hospital | Eff.   | <i>E. coli</i>       | >32 |
| 12-344   | Apr 23 | Hospital | Eff.   | <i>E. coli</i>       | >32 |
| 12-345   | Apr 23 | Hospital | Eff.   | <i>E. coli</i>       | >32 |
| K11-301  | Apr 23 | R-STP    | Inf.   | <i>K. pneumoniae</i> | >32 |
| K11-302  | Apr 23 | R-STP    | Inf.   | <i>K. pneumoniae</i> | >32 |
| K11-303  | Apr 23 | R-STP    | Inf.   | <i>K. oxytoca</i>    | >32 |
| K11-304  | Apr 23 | R-STP    | Inf.   | <i>K. pneumoniae</i> | >32 |
| K11-305  | Apr 23 | R-STP    | Inf.   | <i>K. pneumoniae</i> | >32 |
| K11-306  | Apr 23 | R-STP    | Inf.   | <i>K. pneumoniae</i> | >32 |
| K11-307  | Apr 23 | R-STP    | Inf.   | <i>K. oxytoca</i>    | >32 |
| K11-308  | Apr 23 | R-STP    | Inf.   | <i>K. oxytoca</i>    | >32 |
| K11-309  | Apr 23 | R-STP    | T-Eff. | <i>K. oxytoca</i>    | >32 |
| K11-310  | Apr 23 | R-STP    | T-Eff. | <i>K. pneumoniae</i> | >32 |
| K11-311  | Apr 23 | R-STP    | T-Eff. | <i>K. pneumoniae</i> | >32 |
| K11-312  | Apr 23 | R-STP    | T-Eff. | <i>K. pneumoniae</i> | >32 |
| K11-313  | Apr 23 | R-STP    | T-Eff. | <i>K. oxytoca</i>    | >32 |
| K11-314  | Apr 23 | R-STP    | T-Eff. | <i>K. oxytoca</i>    | >32 |
| K11-315  | Apr 23 | Hospital | Eff.   | <i>K. pneumoniae</i> | >32 |
| K11-316  | Apr 23 | Hospital | Eff.   | <i>K. pneumoniae</i> | >32 |
| K11-317  | Apr 23 | Hospital | Eff.   | <i>K. pneumoniae</i> | >32 |
| K11-318  | Apr 23 | Hospital | Eff.   | <i>K. pneumoniae</i> | >32 |
| K11-319  | Apr 23 | Hospital | Eff.   | <i>K. pneumoniae</i> | >32 |
| K11-320  | Apr 23 | Hospital | Eff.   | <i>K. pneumoniae</i> | >32 |
| K11-321  | Apr 23 | Hospital | Eff.   | <i>K. pneumoniae</i> | >32 |
| K11-322  | Apr 23 | Hospital | Eff.   | <i>K. pneumoniae</i> | >32 |
| K11-323  | Apr 23 | Hospital | Eff.   | <i>K. pneumoniae</i> | >32 |
| K11-324  | Apr 23 | Hospital | Eff.   | <i>K. pneumoniae</i> | >32 |
| K11-325  | Apr 23 | Hospital | Eff.   | <i>K. oxytoca</i>    | >32 |
| K11-327  | Apr 23 | Hospital | Eff.   | <i>K. pneumoniae</i> | >32 |
| K11-328  | Apr 23 | Hospital | Eff.   | <i>K. oxytoca</i>    | >32 |
| K11-329  | Apr 23 | Hospital | Eff.   | <i>K. pneumoniae</i> | >32 |
| K11-T301 | Apr 23 | R-STP    | T-Eff. | <i>K. pneumoniae</i> | 32  |
| K11-T302 | Apr 23 | R-STP    | T-Eff. | <i>K. pneumoniae</i> | >32 |

**Legend:** R-STP (receiving sewage treatment plant); Inf (influent); Eff (effluent); T-EFF (treated efflu (sulfamethoxazole); TET (tetracycline); TGC (tigecycline); GEN (gentamicin); AMK (amikacin); CH

and *Klebsiella* spp. (n=55) strains in this study.

|     |     |     |       |     |        | MIC (µg/mL) |  |
|-----|-----|-----|-------|-----|--------|-------------|--|
| AZI | FOT | TAZ | MERO  | NAL | CIP    | TMP         |  |
| 4   | >4  | >8  | <0.03 | >64 | >8     | 0.5         |  |
| 4   | >4  | >8  | <0.03 | >64 | >8     | 0.5         |  |
| <2  | >4  | 8   | <0.03 | 64  | 0.25   | >16         |  |
| 8   | >4  | >8  | <0.03 | >64 | >8     | 1           |  |
| 32  | >4  | 8   | <0.03 | 8   | 0.5    | >16         |  |
| 4   | >4  | >8  | <0.03 | >64 | >8     | 0.5         |  |
| <2  | 4   | >8  | <0.03 | 16  | 0.5    | >16         |  |
| <2  | >4  | 8   | <0.03 | >64 | >8     | 0.5         |  |
| 4   | >4  | 8   | <0.03 | >64 | >8     | 0.5         |  |
| 8   | >4  | >8  | <0.03 | >64 | >8     | 0.5         |  |
| <2  | >4  | 8   | <0.03 | >64 | >8     | 0.5         |  |
| 8   | >4  | >8  | <0.03 | >64 | >8     | 0.5         |  |
| 8   | >4  | >8  | <0.03 | >64 | >8     | 0.5         |  |
| >64 | >4  | >8  | 0.5   | 64  | 1      | 0.5         |  |
| >64 | >4  | >8  | 0.06  | >64 | 0.5    | >16         |  |
| 8   | >4  | >8  | <0.03 | >64 | >8     | 0.5         |  |
| 4   | >4  | >8  | <0.03 | >64 | >8     | 0.5         |  |
| 4   | >4  | 8   | <0.03 | >64 | >8     | 0.5         |  |
| >64 | >4  | >8  | 0.06  | 64  | 1      | 1           |  |
| 32  | >4  | 2   | <0.03 | <4  | 0.25   | >16         |  |
| 32  | >4  | 4   | <0.03 | >64 | >8     | >16         |  |
| 8   | >4  | 4   | <0.03 | 32  | 0.06   | >16         |  |
| 64  | >4  | 4   | <0.03 | >64 | 0.25   | >16         |  |
| >64 | >4  | >8  | 0.06  | >64 | 8      | >16         |  |
| 4   | >4  | 8   | <0.03 | <4  | <0.015 | <0.25       |  |
| 4   | >4  | 8   | 0.06  | <4  | 1      | >16         |  |
| 64  | >4  | >8  | 0.06  | >64 | 8      | >16         |  |
| >64 | >4  | >8  | >16   | >64 | >8     | >16         |  |
| >64 | >4  | 8   | <0.03 | <4  | <0.015 | >16         |  |
| 4   | >4  | >8  | <0.03 | >64 | >8     | <0.25       |  |
| 4   | >4  | 4   | <0.03 | >64 | 0.25   | 0.5         |  |
| 8   | >4  | >8  | 0.06  | <4  | 1      | >16         |  |
| 64  | >4  | 8   | <0.03 | 64  | 0.25   | >16         |  |
| 16  | >4  | 2   | <0.03 | >64 | >8     | 1           |  |
| 4   | >4  | 8   | <0.03 | <4  | <0.015 | <0.25       |  |
| 64  | >4  | 2   | <0.03 | >64 | 0.25   | >16         |  |
| 4   | >4  | 4   | <0.03 | <4  | <0.015 | <0.25       |  |
| 4   | >4  | 4   | <0.03 | <4  | <0.015 | <0.25       |  |
| >64 | >4  | >8  | >16   | >64 | >8     | >16         |  |
| >64 | >4  | >8  | >16   | >64 | >8     | >16         |  |
| >64 | >4  | >8  | 0.06  | >64 | >8     | >16         |  |
| 64  | >4  | 4   | <0.03 | >64 | >8     | >16         |  |

|     |       |       |       |     |      |       |
|-----|-------|-------|-------|-----|------|-------|
| 16  | >4    | >8    | <0.03 | >64 | 4    | <0.25 |
| 16  | >4    | >8    | <0.03 | >64 | >8   | >16   |
| 16  | >4    | >8    | <0.03 | >64 | >8   | >16   |
| 64  | >4    | >8    | 0.06  | >64 | >8   | >16   |
| 64  | >4    | >8    | <0.03 | >64 | >8   | >16   |
| 16  | >4    | 8     | 0.06  | <4  | 1    | >16   |
| 64  | >4    | >8    | 0.06  | >64 | >8   | >16   |
| >64 | >4    | >8    | <0.03 | <4  | 1    | >16   |
| 64  | >4    | >8    | <0.03 | <4  | 0.5  | <0.25 |
| 16  | >4    | >8    | <0.03 | 8   | 0.5  | >16   |
| 64  | >4    | >8    | <0.03 | <4  | 1    | >16   |
| 32  | >4    | >8    | <0.03 | >64 | >8   | >16   |
| 32  | >4    | >8    | <0.03 | >64 | 2    | >16   |
| 32  | >4    | >8    | <0.03 | >64 | >8   | >16   |
| 8   | >4    | >8    | <0.03 | >64 | 8    | >16   |
| 32  | >4    | >8    | <0.03 | >64 | >8   | >16   |
| 8   | >4    | >8    | <0.03 | >64 | >8   | >16   |
| 16  | >4    | >8    | <0.03 | >64 | >8   | >16   |
| 32  | <0.25 | <0.25 | <0.03 | <4  | 0.06 | 1     |
| 32  | <0.25 | 1     | <0.03 | 16  | 0.06 | 8     |
| 16  | 4     | >8    | 2     | >64 | 0.5  | <0.25 |
| 16  | 4     | >8    | 2     | >64 | 0.5  | <0.25 |
| 16  | 2     | >8    | 1     | 64  | 1    | <0.25 |
| 32  | >4    | >8    | <0.03 | >64 | 0.5  | >16   |
| 4   | 4     | >8    | <0.03 | >64 | 4    | >16   |
| 32  | >4    | 0.5   | <0.03 | >64 | 0.5  | >16   |
| 32  | >4    | 0.5   | <0.03 | >64 | 0.5  | >16   |
| 16  | >4    | 2     | <0.03 | <4  | 0.5  | >16   |
| 4   | >4    | 4     | <0.03 | >64 | 0.25 | 0.5   |
| 4   | >4    | 4     | <0.03 | >64 | 0.25 | 0.5   |
| 4   | >4    | 4     | <0.03 | >64 | 0.25 | 0.5   |
| 4   | >4    | 4     | <0.03 | >64 | 0.25 | 0.5   |
| 4   | >4    | 4     | <0.03 | >64 | 0.5  | 0.5   |
| 8   | >4    | 8     | <0.03 | 32  | 0.06 | >16   |
| >64 | >4    | 1     | <0.03 | >64 | 0.25 | <0.25 |
| 64  | >4    | 8     | <0.03 | >64 | >8   | <0.25 |
| 4   | >4    | >8    | <0.03 | >64 | 0.25 | >16   |
| 32  | >4    | 8     | <0.03 | >64 | 8    | 0.5   |
| >64 | >4    | 8     | <0.03 | >64 | 0.5  | >16   |
| <2  | >4    | >8    | <0.03 | <4  | 0.5  | >16   |
| 8   | >4    | >8    | 0.12  | <4  | 2    | >16   |
| 4   | >4    | >8    | <0.03 | 32  | 0.12 | 0.5   |
| >64 | >4    | >8    | 0.12  | 32  | 1    | 0.5   |
| 64  | >4    | 8     | <0.03 | >64 | 0.5  | >16   |
| 64  | >4    | >8    | 0.06  | 8   | 2    | >16   |
| 4   | >4    | >8    | <0.03 | <4  | 0.25 | >16   |

|     |       |     |       |     |      |       |
|-----|-------|-----|-------|-----|------|-------|
| >64 | >4    | 8   | 0.06  | >64 | 1    | >16   |
| 64  | >4    | >8  | <0.03 | >64 | 8    | <0.25 |
| 8   | >4    | >8  | 0.06  | <4  | 1    | >16   |
| 16  | >4    | >8  | <0.03 | 16  | 1    | >16   |
| 16  | >4    | 8   | <0.03 | >64 | >8   | >16   |
| 32  | >4    | >8  | 0.06  | >64 | >8   | >16   |
| 16  | >4    | >8  | <0.03 | >64 | 4    | >16   |
| 8   | >4    | >8  | <0.03 | >64 | 8    | >16   |
| 16  | >4    | 8   | <0.03 | >64 | >8   | >16   |
| 32  | >4    | >8  | 0.06  | >64 | >8   | >16   |
| 32  | >4    | >8  | 0.06  | >64 | >8   | >16   |
| 16  | >4    | >8  | <0.03 | 16  | 2    | >16   |
| 8   | >4    | 8   | <0.03 | >64 | >8   | >16   |
| 16  | >4    | >8  | <0.03 | >64 | >8   | >16   |
| 16  | >4    | >8  | <0.03 | >64 | >8   | >16   |
| 16  | >4    | >8  | <0.03 | 16  | 2    | >16   |
| 64  | >4    | >8  | 0.06  | >64 | >8   | >16   |
| 16  | >4    | >8  | <0.03 | >64 | >8   | >16   |
| 16  | >4    | >8  | <0.03 | >64 | >8   | >16   |
| 16  | >4    | >8  | <0.03 | >64 | >8   | >16   |
| 16  | >4    | >8  | <0.03 | >64 | >8   | >16   |
| 16  | >4    | >8  | <0.03 | >64 | >8   | >16   |
| 16  | >4    | >8  | <0.03 | >64 | >8   | >16   |
| 16  | >4    | >8  | <0.03 | >64 | >8   | >16   |
| 16  | >4    | >8  | <0.03 | >64 | >8   | >16   |
| 16  | >4    | >8  | <0.03 | >64 | >8   | >16   |
| 16  | >4    | >8  | <0.03 | >64 | >8   | >16   |
| 16  | >4    | >8  | <0.03 | >64 | >8   | >16   |
| 16  | >4    | >8  | <0.03 | >64 | >8   | >16   |
| 64  | >4    | >8  | 0.06  | >64 | >8   | >16   |
| 16  | >4    | >8  | <0.03 | >64 | 8    | >16   |
| 64  | >4    | >8  | 0.06  | >64 | >8   | >16   |
| 16  | >4    | >8  | <0.03 | >64 | >8   | >16   |
| 16  | <0.25 | 0.5 | <0.03 | 16  | 2    | >16   |
| 16  | 0.5   | 1   | <0.03 | 16  | 0.25 | >16   |

ient); AMP (ampicillin); AZM (azithromycin); CTX (cefotaxime); CAZ (ceftazidime); MEM (r  
IL (chloramphenicol); CST (colistin).

| SMX  | TET | TGC   | GEN  | AMI | CHL | CST |
|------|-----|-------|------|-----|-----|-----|
| >512 | <2  | <0.25 | <0.5 | <4  | <8  | <1  |
| >512 | <2  | <0.25 | <0.5 | <4  | <8  | <1  |
| 64   | >32 | 0.5   | <0.5 | <4  | <8  | <1  |
| 32   | <2  | <0.25 | >16  | <4  | 16  | <1  |
| >512 | <2  | 0.5   | >16  | 8   | >64 | <1  |
| 64   | <2  | 0.5   | >16  | <4  | 16  | <1  |
| >512 | <2  | <0.25 | >16  | <4  | <8  | <1  |
| 64   | <2  | <0.25 | <0.5 | <4  | <8  | <1  |
| 16   | <2  | <0.25 | >16  | <4  | <8  | <1  |
| 64   | <2  | <0.25 | >16  | <4  | 16  | <1  |
| 32   | <2  | <0.25 | >16  | <4  | <8  | <1  |
| 64   | <2  | <0.25 | >16  | <4  | 16  | <1  |
| 64   | <2  | <0.25 | >16  | <4  | <8  | <1  |
| 32   | 4   | 0.5   | 1    | <4  | 16  | <1  |
| >512 | 32  | <0.25 | 1    | <4  | <8  | <1  |
| 64   | <2  | <0.25 | >16  | <4  | 16  | <1  |
| 64   | <2  | <0.25 | >16  | <4  | <8  | <1  |
| 32   | <2  | <0.25 | >16  | <4  | <8  | <1  |
| 16   | 4   | <0.25 | <0.5 | <4  | <8  | <1  |
| >512 | >32 | <0.25 | <0.5 | <4  | <8  | <1  |
| >512 | >32 | <0.25 | 1    | <4  | <8  | <1  |
| >512 | >32 | 0.5   | 1    | <4  | <8  | <1  |
| >512 | >32 | <0.25 | >16  | <4  | <8  | <1  |
| >512 | <2  | <0.25 | >16  | <4  | <8  | <1  |
| <8   | <2  | <0.25 | 1    | 8   | <8  | <1  |
| >512 | <2  | <0.25 | >16  | 8   | <8  | <1  |
| >512 | <2  | <0.25 | 16   | <4  | <8  | <1  |
| >512 | >32 | <0.25 | <0.5 | <4  | >64 | <1  |
| >512 | >32 | <0.25 | 1    | <4  | <8  | <1  |
| 32   | <2  | <0.25 | >16  | <4  | <8  | <1  |
| 32   | <2  | <0.25 | <0.5 | <4  | <8  | <1  |
| >512 | >32 | <0.25 | >16  | 8   | <8  | <1  |
| 32   | >32 | <0.25 | 1    | <4  | <8  | <1  |
| >512 | 32  | <0.25 | >16  | 8   | 16  | <1  |
| <8   | <2  | <0.25 | <0.5 | <4  | <8  | <1  |
| >512 | >32 | <0.25 | <0.5 | <4  | <8  | <1  |
| <8   | <2  | <0.25 | <0.5 | <4  | <8  | <1  |
| <8   | <2  | <0.25 | <0.5 | <4  | <8  | <1  |
| >512 | >32 | 0.5   | <0.5 | <4  | >64 | <1  |
| >512 | >32 | <0.25 | <0.5 | <4  | >64 | <1  |
| >512 | >32 | <0.25 | >16  | <4  | <8  | <1  |
| >512 | 32  | 0.5   | 16   | <4  | <8  | <1  |

|      |     |       |      |    |     |    |
|------|-----|-------|------|----|-----|----|
| <8   | <2  | <0.25 | <0.5 | <4 | <8  | <1 |
| >512 | >32 | 1     | 16   | <4 | <8  | <1 |
| >512 | >32 | 1     | 16   | <4 | <8  | <1 |
| >512 | 32  | <0.25 | 16   | <4 | <8  | <1 |
| >512 | >32 | <0.25 | 16   | <4 | >64 | <1 |
| >512 | 32  | 0.5   | >16  | <4 | 16  | <1 |
| >512 | >32 | <0.25 | 16   | <4 | >64 | <1 |
| >512 | <2  | <0.25 | >16  | <4 | >64 | <1 |
| >512 | <2  | <0.25 | <0.5 | <4 | >64 | <1 |
| >512 | <2  | <0.25 | <0.5 | <4 | >64 | <1 |
| >512 | <2  | <0.25 | >16  | <4 | >64 | <1 |
| >512 | >32 | 4     | 16   | <4 | 16  | <1 |
| >512 | >32 | 4     | 16   | <4 | 32  | <1 |
| >512 | >32 | 4     | 16   | <4 | 32  | <1 |
| >512 | >32 | 1     | >16  | <4 | <8  | <1 |
| >512 | >32 | 2     | 4    | <4 | <8  | <1 |
| >512 | >32 | 2     | >16  | <4 | <8  | <1 |
| >512 | >32 | 2     | 16   | <4 | 16  | <1 |
| <8   | 8   | 1     | <0.5 | <4 | 8   | <1 |
| 32   | 16  | 4     | <0.5 | <4 | 32  | <1 |
| <8   | <2  | <0.25 | 4    | <4 | <8  | <1 |
| <8   | <2  | <0.25 | 4    | <4 | <8  | <1 |
| <8   | <2  | <0.25 | 4    | <4 | <8  | <1 |
| <8   | >32 | <0.25 | <0.5 | <4 | <8  | <1 |
| >512 | <2  | <0.25 | >16  | <4 | <8  | <1 |
| >512 | >32 | <0.25 | >16  | <4 | <8  | <1 |
| >512 | >32 | <0.25 | >16  | <4 | <8  | <1 |
| >512 | >32 | <0.25 | 1    | <4 | <8  | <1 |
| 128  | <2  | <0.25 | <0.5 | <4 | <8  | <1 |
| 64   | <2  | <0.25 | <0.5 | <4 | <8  | <1 |
| 64   | <2  | <0.25 | 1    | <4 | <8  | <1 |
| 128  | <2  | <0.25 | 1    | <4 | <8  | <1 |
| 128  | <2  | <0.25 | <0.5 | <4 | <8  | <1 |
| >512 | >32 | 0.5   | <0.5 | <4 | <8  | <1 |
| <8   | >32 | <0.25 | <0.5 | <4 | <8  | <1 |
| 16   | <2  | <0.25 | >16  | <4 | <8  | <1 |
| >512 | >32 | <0.25 | 1    | <4 | <8  | <1 |
| >512 | 32  | <0.25 | >16  | 8  | >64 | <1 |
| >512 | >32 | <0.25 | >16  | <4 | 16  | <1 |
| >512 | >32 | <0.25 | <0.5 | <4 | <8  | <1 |
| >512 | >32 | <0.25 | >16  | 16 | <8  | <1 |
| >512 | <2  | <0.25 | <0.5 | <4 | <8  | 8  |
| 16   | <2  | <0.25 | 1    | <4 | <8  | <1 |
| >512 | >32 | <0.25 | >16  | <4 | 16  | <1 |
| >512 | >32 | <0.25 | >16  | 8  | 16  | <1 |
| >512 | >32 | <0.25 | <0.5 | 4  | <8  | <1 |



|      |     |       |      |    |     |    |
|------|-----|-------|------|----|-----|----|
| >512 | 32  | <0.25 | 8    | <4 | <8  | <1 |
| >512 | >32 | <0.25 | >16  | 8  | >64 | <1 |
| >512 | <2  | <0.25 | >16  | 16 | <8  | <1 |
| 64   | <2  | <0.25 | <0.5 | <4 | <8  | <1 |
| >512 | >32 | 0.5   | 16   | <4 | <8  | <1 |
| >512 | >32 | <0.25 | 16   | <4 | >64 | <1 |
| >512 | 4   | 0.5   | 16   | <4 | <8  | 2  |
| >512 | 4   | 0.5   | 16   | <4 | <8  | 2  |
| >512 | >32 | 0.5   | >16  | <4 | <8  | <1 |
| >512 | >32 | <0.25 | 16   | <4 | >64 | <1 |
| >512 | >32 | <0.25 | 16   | <4 | >64 | <1 |
| >512 | >32 | 0.5   | 16   | <4 | <8  | <1 |
| >512 | >32 | 0.5   | 16   | <4 | <8  | <1 |
| >512 | >32 | 0.5   | 16   | <4 | <8  | <1 |
| >512 | >32 | 0.5   | >16  | <4 | <8  | <1 |
| >512 | >32 | 0.5   | 16   | <4 | <8  | <1 |
| >512 | >32 | <0.25 | 16   | <4 | >64 | <1 |
| >512 | >32 | 1     | 16   | <4 | <8  | <1 |
| >512 | >32 | 1     | >16  | <4 | <8  | <1 |
| >512 | >32 | 1     | 16   | <4 | <8  | <1 |
| >512 | >32 | 1     | 16   | <4 | <8  | <1 |
| >512 | >32 | 1     | 16   | <4 | <8  | <1 |
| >512 | >32 | 1     | 16   | <4 | <8  | <1 |
| >512 | >32 | 1     | 16   | <4 | <8  | <1 |
| >512 | >32 | 1     | 16   | <4 | <8  | <1 |
| >512 | >32 | 1     | 16   | <4 | <8  | <1 |
| >512 | >32 | 1     | 16   | <4 | <8  | <1 |
| >512 | >32 | 1     | 16   | <4 | <8  | <1 |
| >512 | >32 | 1     | 16   | <4 | <8  | <1 |
| >512 | >32 | 1     | 16   | <4 | <8  | <1 |
| >512 | >32 | <0.25 | 16   | <4 | >64 | <1 |
| >512 | 4   | 0.5   | 16   | <4 | <8  | 4  |
| >512 | >32 | <0.25 | 16   | <4 | >64 |    |
| >512 | 4   | 0.5   | 16   | <4 | <8  | 4  |
| >512 | >32 | 2     | <0.5 | <4 | 16  | <1 |
| >512 | >32 | 4     | <0.5 | <4 | >64 | <1 |

---

neropenem); NAL (nalidixic acid); CIP (ciprofloxacin); TMP (trimethoprim); SMX
