# Supplementary material for: Novel antibiotic resistance genes from the hospital effluent are disseminated into the marine environment in Norway
Source: bioRxiv or medRxiv preprint supplement (doi:10.1101/2024.09.23.24313887), 2024-09-24
Supplement: Supplementary file [file media-3.pdf]

**Supplementary Table S2:** Genome assembly statistics of sequenced strains (n=36) in this stud

| <b>Strain</b> | <b>Species</b>          | <b>Accession number</b> | <b>Genome size (bp)</b> |
|---------------|-------------------------|-------------------------|-------------------------|
| 11-303        | <i>E. coli</i>          |                         | 5,361,939               |
| 11-305        | <i>E. coli</i>          |                         | 5,172,230               |
| 11-315        | <i>E. coli</i>          |                         | 5,134,302               |
| 11-317        | <i>E. coli</i>          |                         | 5,058,423               |
| 11-320        | <i>E. coli</i>          |                         | 5,121,918               |
| 11-321        | <i>E. coli</i>          |                         | 5,121,196               |
| 11-330        | <i>E. coli</i>          |                         | 4,889,655               |
| 11-336        | <i>E. coli</i>          |                         | 5,161,917               |
| 11-338        | <i>E. coli</i>          |                         | 4,937,829               |
| 12-306        | <i>E. coli</i>          |                         | 4,967,142               |
| 12-310        | <i>E. coli</i>          |                         | 5,219,703               |
| 12-327        | <i>E. coli</i>          |                         | 4,590,194               |
| 12-328        | <i>E. coli</i>          |                         | 4,860,094               |
| 12-336        | <i>E. coli</i>          |                         | 4,806,073               |
| 12-337        | <i>E. coli</i>          |                         | 5,288,896               |
| 12-341        | <i>E. coli</i>          |                         | 4,878,940               |
| 12-343        | <i>E. coli</i>          |                         | 4,866,874               |
| 11-M301       | <i>E. coli</i>          |                         | 4,893,152               |
| 11-M302       | <i>E. coli</i>          |                         | 4,888,903               |
| K10-311       | <i>K. pneumoniae</i>    |                         | 5,857,362               |
| K10-321       | <i>K. michiganensis</i> |                         | 6,384,740               |
| K10-M302      | <i>K. michiganensis</i> |                         | 6,109,672               |
| K10-M304      | <i>K. michiganensis</i> |                         | 6,168,049               |
| K10-M306      | <i>K. michiganensis</i> |                         | 6,180,804               |
| K10-T302      | <i>K. pneumoniae</i>    |                         | 5,858,561               |
| K10-T303      | <i>K. pneumoniae</i>    |                         | 5,869,222               |
| K10-T306      | <i>K. pneumoniae</i>    |                         | 5,884,286               |
| K11-302       | <i>K. pneumoniae</i>    |                         | 5,476,119               |
| K11-303       | <i>K. michiganensis</i> |                         | 6,279,332               |
| K11-304       | <i>K. pneumoniae</i>    |                         | 5,808,781               |
| K11-305       | <i>K. pneumoniae</i>    |                         | 5,804,183               |
| K11-314       | <i>K. michiganensis</i> |                         | 6,259,219               |
| K11-324       | <i>K. pneumoniae</i>    |                         | 5,874,880               |
| K11-325       | <i>K. michiganensis</i> |                         | 6,346,676               |
| K11-327       | <i>K. pneumoniae</i>    |                         | 5,803,532               |
| K11-329       | <i>K. pneumoniae</i>    |                         | 5,814,628               |

y.

| <b>No. of contigs<br/>(≥500 bp)</b> | <b>Largest contig</b> | <b>N50</b> | <b>GC content (%)</b> | <b>tRNA genes</b> |
|-------------------------------------|-----------------------|------------|-----------------------|-------------------|
| 129                                 | 391.648               | 137.123    | 50.71                 | 78                |
| 154                                 | 271.157               | 100.393    | 50.78                 | 77                |
| 206                                 | 300.645               | 81.982     | 50.61                 | 72                |
| 75                                  | 602.478               | 201.086    | 50.52                 | 73                |
| 168                                 | 313.888               | 113.319    | 50.61                 | 75                |
| 109                                 | 531.044               | 190.924    | 50.81                 | 80                |
| 95                                  | 527.397               | 147.301    | 50.64                 | 75                |
| 135                                 | 375.261               | 112.495    | 50.69                 | 74                |
| 125                                 | 418.355               | 107.152    | 50.61                 | 79                |
| 66                                  | 599.233               | 262.718    | 50.61                 | 76                |
| 67                                  | 462.721               | 225.822    | 50.77                 | 81                |
| 97                                  | 356.940               | 134.206    | 50.61                 | 73                |
| 135                                 | 523.725               | 125.474    | 50.63                 | 75                |
| 172                                 | 150.488               | 64.731     | 50.91                 | 69                |
| 191                                 | 343.918               | 118.963    | 50.73                 | 74                |
| 157                                 | 162.241               | 71.476     | 51.03                 | 72                |
| 177                                 | 184.106               | 75.268     | 50.88                 | 74                |
| 91                                  | 543.390               | 147.301    | 50.64                 | 75                |
| 96                                  | 527.397               | 147.301    | 50.63                 | 75                |
| 104                                 | 699.965               | 307.14     | 56.64                 | 77                |
| 113                                 | 548.666               | 157.103    | 55.46                 | 71                |
| 173                                 | 342.450               | 198.305    | 55.62                 | 70                |
| 165                                 | 342.450               | 194.646    | 55.63                 | 71                |
| 178                                 | 425.784               | 219.167    | 55.51                 | 69                |
| 109                                 | 559.528               | 354.606    | 56.62                 | 73                |
| 97                                  | 559.528               | 307.140    | 56.63                 | 73                |
| 88                                  | 559.528               | 354.606    | 56.62                 | 77                |
| 46                                  | 593.057               | 377.679    | 57.28                 | 76                |
| 96                                  | 478.315               | 280.717    | 55.94                 | 71                |
| 131                                 | 595.088               | 264.543    | 56.93                 | 73                |
| 105                                 | 595.088               | 302.134    | 56.94                 | 75                |
| 103                                 | 687.219               | 324.010    | 55.94                 | 71                |
| 84                                  | 946.133               | 354.606    | 56.63                 | 77                |
| 94                                  | 950.607               | 346.128    | 55.91                 | 75                |
| 107                                 | 595.088               | 302.134    | 56.94                 | 75                |
| 116                                 | 595.088               | 302.134    | 56.81                 | 75                |

---

**No. of CDSs  
(total)**

---

5.277

5.072

5.164

4.938

5.109

5.041

4.701

5.073

4.836

4.713

5.017

4.449

4.876

4.744

5.273

4.773

4.749

4.704

4.705

5.751

6.064

5.878

5.947

5.985

5.771

5.768

5.780

5.248

5.959

5.758

5.747

5.931

5.765

6.053

5.745

5.756

---
