# Supplementary material for: Novel antibiotic resistance genes from the hospital effluent are disseminated into the marine environment in Norway
Source: bioRxiv or medRxiv preprint supplement (doi:10.1101/2024.09.23.24313887), 2024-09-24
Supplement: Supplementary file [file media-4.pdf]

**Supplementary Table S3:** Detected antibiotic resistance genes (ARGs) and sequence

| <b>Strain</b> | <b>Species</b>          | <b>Sample type</b> | <b>ST</b> |
|---------------|-------------------------|--------------------|-----------|
| 11-303        | <i>E. coli</i>          | Hospital-eff.      | 69        |
| 11-305        | <i>E. coli</i>          | Hospital-eff.      | 399       |
| 11-315        | <i>E. coli</i>          | Hospital-eff.      | 401       |
| 11-317        | <i>E. coli</i>          | Hospital-eff.      | 131       |
| 11-320        | <i>E. coli</i>          | Hospital-eff.      | 401       |
| 11-321        | <i>E. coli</i>          | STP-inf.           | 5614      |
| 11-330        | <i>E. coli</i>          | STP-inf.           | 11681     |
| 11-336        | <i>E. coli</i>          | STP-T-eff.         | 448       |
| 11-338        | <i>E. coli</i>          | STP-T-eff.         | 2253      |
| 12-306        | <i>E. coli</i>          | STP-inf.           | 38        |
| 12-310        | <i>E. coli</i>          | STP-inf.           | 219       |
| 12-327        | <i>E. coli</i>          | STP-T-eff.         | 10        |
| 12-328        | <i>E. coli</i>          | STP-T-eff.         | 10        |
| 12-336        | <i>E. coli</i>          | Hospital-eff.      | 11873     |
| 12-337        | <i>E. coli</i>          | Hospital-eff.      | 10        |
| 12-341        | <i>E. coli</i>          | Hospital-eff.      | 11873     |
| 12-343        | <i>E. coli</i>          | Hospital-eff.      | 398       |
| 11-M301       | <i>E. coli</i>          | STP-inf.           | 11681     |
| 11-M302       | <i>E. coli</i>          | STP-T-eff.         | 11681     |
| K10-311       | <i>K. pneumoniae</i>    | STP-T-eff.         | ST307     |
| K10-321       | <i>K. michiganensis</i> | STP-T-eff.         | NA        |
| K10-T302      | <i>K. michiganensis</i> | Hospital-eff.      | NA        |
| K10-T303      | <i>K. michiganensis</i> | Hospital-eff.      | NA        |
| K10-T306      | <i>K. michiganensis</i> | Hospital-eff.      | NA        |
| K10-M302      | <i>K. pneumoniae</i>    | Hospital-eff.      | ST307     |
| K10-M304      | <i>K. pneumoniae</i>    | Hospital-eff.      | ST307     |

|          |                         |               |        |
|----------|-------------------------|---------------|--------|
| K10-M306 | <i>K. pneumoniae</i>    | Hospital-eff. | ST307  |
| K11-302  | <i>K. pneumoniae</i>    | STP-inf.      | ST307  |
| K11-303  | <i>K. michiganensis</i> | STP-inf.      | NA     |
| K11-304  | <i>K. pneumoniae</i>    | STP-inf.      | ST2947 |
| K11-305  | <i>K. pneumoniae</i>    | STP-inf.      | ST2947 |
| K11-314  | <i>K. michiganensis</i> | STP-T-eff.    | NA     |
| K11-324  | <i>K. pneumoniae</i>    | Hospital-eff. | ST307  |
| K11-325  | <i>K. michiganensis</i> | Hospital-eff. | NA     |
| K11-327  | <i>K. pneumoniae</i>    | Hospital-eff. | ST2947 |
| K11-329  | <i>K. pneumoniae</i>    | Hospital-eff. | ST2947 |

**Legend:** eff (effluent); STP (sewage treatment plant); inf (influent); T (treated); NA

ce types (STs) in sequenced strains (n=36).

---

**ARGs**

---

*mph(A), dfrA14, tet(B), blaCTX-M-15*

*aadA1, aac(3)-IIa, aac(6')-Ib-cr, aph(3')-Ia, dfrA14, sul1, sul2, qnrS1, ARR-2, blaCTX-M-15, blaOXA-1, blaDHA1, blaOXA-10, blaTEM-1B, mph(A), catB3, catA2, floR, cmlA1*

*msr(E), mph(E), blaSHV-12, blaOXA-2*

*aac(3)-IId, blaTEM-1B, blaCTX-M-15*

*msr(E), mph(E), blaSHV-12, blaOXA-2*

*aph(3'')-Ib, aph(6)-Id, aadA5, qnrS1, dfrA17, sul1, sul2, tet(A), blaCTX-M-15, mph(A)*

*dfrA1, dfrA12, sul1, aadA2, aadA1, mph(A), tet(A), tet(B), blaCMY-145, blaNDM-5, blaOXA-1, catA1*

*sul1, sul2, ant(2'')-Ia, aadA1, aph(3'')-Ib, aac(6')-Ib-cr, aac(3)-Iia, aph(6)-Id, mph(A), tet(A), blaOXA-1, blaTEM-1, blaCTX-M-15, catB3, cmlA1*

*dfrA17, sul1, aadA5, mph(A), tet(A), blaCTX-M-15*

*dfrA17, sul1, sul2, aph(3'')-Ib, aadA5, aac(3)-IId, aph(6)-Id, mph(A), tet(D), blaTEM-1B, blaCTX-M-14, catA1*

*aadA5, aph(3'')-Ib, aph(6)-Id, mph(A), qnrS1, dfrA17, sul1, sul2, tet(A), blaCTX-M-15*

*aph(6)-Id, aadA1, aph(3'')-Ib, dfrA1, sul2, tet(A), blaCTX-M-15*

*tet(B), blaCTX-M-14b, mph(A)*

*aac(3)-IId, aph(6)-Id, aac(6')-Ib-cr, aph(3'')-Ib, qnrS1, dfrA14, sul2, tet(A), blaLAP-2, blaOXA-1, blaCTX-M-105, sul2, blaSHV-12, blaOXA-2*

*dfrA12, dfrA14, sul1, sul2, aac(3)II, aac(3)-IV, aac(6')-Ib-cr, aph(4)-Ia, aph(3'')-Ib, aadA2, aph(6)-Id, aph(3')-Ia, qnrS1, tet(A), blaCTX-M-105, blaLAP-2, blaOXA-1, catB3*

*msr(E), aadA2, aph(6)-Id, aph(3'')-Ib, aac(3)-I, mph(E), dfrA23, sul1, sul2, tet(C), blaOXA-2, blaCTX-M-3, blaTEM-1*

*blaNDM-5, blaOXA-1, blaCMY-145, aadA1, aadA2, mph(A), dfrA1, dfrA12, sul1, tet(A), tet(B), catA1*

*blaNDM-5, blaOXA-1, blaCMY-145, aadA1, aadA2, mph(A), dfrA1, dfrA12, sul1, tet(A), tet(B), catA1*

*aph(3'')-Ib, aph(6)-Id, aac(3)-IId, aac(6')-Ib-cr5, bla, class A beta-lactamase, blaCTX-M-15, blaOXA-1, sul2, dfrA14, oqxB19, fosA5, tet(A), qnrB1, catB*

*aph(3')-Ia, aac(3)-IId, aac(6')-Ib-cr5, aadA1, blaTEM-1, blaOXY-1-4, blaCTX-M-15, blaOXA-1, blaOXA-10, sul1, dfrA14, mph(A), qnrS1, arr-2, catA2*

*aph(3'')-Ib, aph(6)-Id, aac(3)-IId, aac(6')-Ib-cr5, blaCTX-M-15, blaOXA-1, blaTEM-1, class A beta-lactamase, dfrA14, oqxA, oqxB19, fosA5, tet(A), qnrB1, catB*

*aph(3'')-Ib, aph(6)-Id, aac(3)-IId, aac(6')-Ib-cr5, blaCTX-M-15, blaOXA-1, class A beta-lactamase, sul2, dfrA14, oqxA, oqxB19, fosA5, tet(A), qnrB1, catB*

*aph(3'')-Ib, aph(6)-Id, aac(3)-IId, aac(6')-Ib-cr5, blaCTX-M-15, blaOXA-1, class A beta-lactamase, sul2, dfrA14, oqxB19, fosA5, tet(A), qnrB1, catB*

*aac(3)-I, aac(6')-4, blaOXA-2, blaOXA-9, blaOXY-5-6, blaTEM-1, blaKPC-3, oqxB*

*aac(3)-I, aac(6')-4, blaOXY-5-6, blaOXA-2, blaOXA-9, blaTEM-1, blaKPC-3, oqxB*

*ant(3''), aac(6')-Ib4, blaOXA-9, blaOXY-5-6, blaTEM-1, blaKPC-3, qnrS1, oqxB*

*aph(3'')-Ib, aph(6)-Id, aac(3)-Ile, aac(6')-Ib-cr5, blaCTX-M-15, blaOXA-1, blaTEM-1, blaSHV-28, sul2, dfrA14, oqxB19, fosA5, tet(A), qnrB1, catB*

*ant(3'')-Ia, aph(3')-I, aph(3'')-Ib, aph(6)-Id, aac(6')-Ib-cr5, blaCTX-M-15, blaOXA-1, blaOXY-1-1, blaTEM-1, sul1, dfrA17, oqxB, mph(A), tet(A), tet(B), qnrB1, catA1*

*aph(3'')-Ib, aph(6)-Id, aac(3)-IId, class A beta-lactamase X2, sul2, dfrA14, oqxA, oqxB19, fosA5*

*aph(3'')-Ib, aph(6)-Id, aac(3)-IId, class A beta-lactamase X2, sul2, dfrA14, oqxA, oqxB19, fosA5*

*ant(3'')-Ia, aph(3')-I, aph(3'')-Ib, aph(6)-Id, aac(3)-IId, aac(3)-Ile, aac(6')-Ib-cr5, blaCTX-M-15, blaOXA-1, blaTEM-1, sul1, dfrA14, dfrA17, oqxB, mph(A), tet(A), tet(B), qnrB1, catB*

*aph(3'')-Ib, aph(6)-Id, aac(3)-Ile, aac(6')-Ib-cr5, blaCTX-M-15, blaOXA-1, class A beta-lactamase X2, sul2, dfrA14, oqxB19, fosA5, tet(A), qnrB1, catB*

*ant(3'')-Ia, aph(3')-I, aph(3'')-Ib, aph(6)-Id, aac(3)-Ile, aac(3)-IId, aac(6')-Ib-cr5, blaCTX-M-15, blaOXA-1, blaTEM-1, sul1, dfrA14, dfrA17, oqxB, mph(A), tet(A), tet(B), qnrB1, catB*

*aac(3)-IId, aph(3'')-Ib, aph(6)-Id, class A beta-lactamase X2, sul2, dfrA14, oqxA, oqxB19, fosA5*

*aph(3'')-Ib, aph(6)-Id, aac(3)-IId, blaTEM, class A beta-lactamase X2, sul2, dfrA14, oqxA, oqxB19, fosA5*  
(not available).
