# Supplementary material for: Novel antibiotic resistance genes from the hospital effluent are disseminated into the marine environment in Norway
Source: bioRxiv or medRxiv preprint supplement (doi:10.1101/2024.09.23.24313887), 2024-09-24
Supplement: Supplementary file [file media-5.pdf]

**Supplementary Table S5:** Relative abundance of most detected mobile genetic elements

---

| <b>MGEs</b>   | <b>Hospital effluent February</b> | <b>Hospital effluent April</b> | <b>STP influent February</b> |
|---------------|-----------------------------------|--------------------------------|------------------------------|
| <i>ISCR1</i>  | 0.0004981                         | 0.0007864                      | 0.0000293                    |
| <i>ISCR2</i>  | 0.0028998                         | 0.0015079                      | 0.0004916                    |
| <i>ISCR3</i>  | 0                                 | 0                              | 0                            |
| <i>ISCR4</i>  | 0                                 | 0                              | 0                            |
| <i>ISCR5</i>  | 0.0005498                         | 0.0003501                      | 0.0001527                    |
| <i>ISCR6</i>  | 0                                 | 0                              | 0                            |
| <i>ISCR7</i>  | 0                                 | 0                              | 0                            |
| <i>ISCR8</i>  | 0                                 | 0                              | 0                            |
| <i>ISCR14</i> | 0                                 | 0                              | 0                            |
| <i>intI1</i>  | 0.0609183                         | 0.0397664                      | 0.0053216                    |
| <i>intI2</i>  | 0.0026767                         | 0.0022447                      | 0.0012776                    |
| <i>intI3</i>  | 0.0000519                         | 0.0000783                      | 0.0000847                    |
| <i>intI6</i>  | 0                                 | 0                              | 0                            |
| <i>intI7</i>  | 0                                 | 0                              | 0                            |
| <i>intI8</i>  | 0                                 | 0                              | 0                            |
| <i>intI9</i>  | 0                                 | 0                              | 0                            |
| <i>intI10</i> | 0                                 | 0                              | 0                            |
| other         | 0.1736948                         | 0.1484144                      | 0.0731509                    |

---

**Legend:** STP (sewage treatment plant).

(MGEs) across samples.

---

| <b>STP influent April</b> | <b>STP treated effluent<br/>February</b> | <b>STP treated effluent April</b> |
|---------------------------|------------------------------------------|-----------------------------------|
| 0.0000750                 | 0.0000281                                | 0.0000714                         |
| 0.0004902                 | 0.0002956                                | 0.0003580                         |
| 0                         | 0                                        | 0                                 |
| 0                         | 0                                        | 0                                 |
| 0.0001033                 | 0.0000763                                | 0.0000867                         |
| 0                         | 0                                        | 0                                 |
| 0                         | 0                                        | 0                                 |
| 0                         | 0                                        | 0                                 |
| 0                         | 0                                        | 0                                 |
| 0.0061597                 | 0.0070679                                | 0.0063007                         |
| 0.0010418                 | 0.0008162                                | 0.0008017                         |
| 0.0000526                 | 0.0000934                                | 0.0000563                         |
| 0                         | 0                                        | 0                                 |
| 0                         | 0                                        | 0                                 |
| 0                         | 0                                        | 0                                 |
| 0                         | 0                                        | 0                                 |
| 0                         | 0                                        | 0                                 |
| 0.1019743                 | 0.0650622                                | 0.0871719                         |

---
