# Supplementary material for: Novel antibiotic resistance genes from the hospital effluent are disseminated into the marine environment in Norway
Source: bioRxiv or medRxiv preprint supplement (doi:10.1101/2024.09.23.24313887), 2024-09-24
Supplement: Supplementary file [file media-6.pdf]

Detected biocide/metal resistance genes (BMRGs) across all samples.

BAC0688|merR2|tr|Q79B70|Q79B70\_PSEST Organomercurial resistance regulatory protein OS=Pseudomonas stutzeri GN=merR2 PE=4 SV=1  
BAC0648|merA|sp|P08662|MERA\_SERMA Mercuric reductase (Fragments) OS=Serratia marcescens GN=merA PE=3 SV=1  
BAC0324|qacF|sp|Q9X2N9|QACF\_ENTAE Quaternary ammonium compound-resistance protein QacF OS=Enterobacter aerogenes GN=qacF PE=4 SV=1  
BAC0322|qacE|sp|P0AGC9|QACE\_ECOLX Quaternary ammonium compound-resistance protein QacE OS=Escherichia coli GN=qacE PE=4 SV=1  
BAC0018|adeJ|tr|Q24LT7|Q24LT7\_ACIBA AdeJ OS=Acinetobacter baumannii GN=adeJ PE=4 SV=1  
BAC0323|qacEdelta1|tr|Q7BQY4|Q7BQY4\_PSEAI Disinfectant resistance protein OS=Pseudomonas aeruginosa GN=qacEdelta1 PE=4 SV=1  
BAC0019|adeK|tr|Q24LT6|Q24LT6\_ACIBA AdeK OS=Acinetobacter baumannii GN=adeK PE=4 SV=1  
BAC0335|rpoS|sp|P35540|RPOS\_SHIFL RNA polymerase sigma factor RpoS OS=Shigella flexneri GN=rpoS PE=3 SV=3  
BAC0533|cpXR|tr|C4WZK6|C4WZK6\_KLEPN Response regulator of stress-related two-component regulatory system OS=Klebsiella pneumoniae GN=cpXR PE=4 SV=1  
BAC0536|oxyRkp|tr|C4WZN6|C4WZN6\_KLEPN Activator of hydrogen peroxide-inducible genes OS=Klebsiella pneumoniae GN=oxyRkp PE=4 SV=1  
BAC0532|cpxA|tr|C4WZK5|C4WZK5\_KLEPN Sensor protein of stress-related two-component regulatory system OS=Klebsiella pneumoniae GN=cpxA PE=4 SV=1  
BAC0194|ibpA|sp|P0C054|IBPA\_ECOLI Small heat shock protein IbpA OS=Escherichia coli (strain K12) GN=ibpA PE=1 SV=1  
BAC0564|actP|yjcG|sp|P32705|ACTP\_ECOLI Cation/acetate symporter ActP OS=Escherichia coli (strain K12) GN=actP PE=1 SV=1  
BAC0017|adeI|tr|Q2FD95|Q2FD95\_ACIBA AdeI OS=Acinetobacter baumannii GN=adeI PE=4 SV=1  
BAC0368|sodA|sp|P00448|SODM\_ECOLI Superoxide dismutase [Mn] OS=Escherichia coli (strain K12) GN=sodA PE=1 SV=1  
BAC0001|abeM|tr|Q5FAM9|Q5FAM9\_ACIBA Multidrug efflux pump AbeM OS=Acinetobacter baumannii GN=abeM PE=4 SV=1  
BAC0211|mdtB/yegN|sp|P76398|MDTB\_ECOLI Multidrug resistance protein MdtB OS=Escherichia coli (strain K12) GN=mdtB PE=1 SV=1  
BAC0559|emrR|sp|P0ACR9|MPRA\_ECOLI Transcriptional repressor MprA OS=Escherichia coli (strain K12) GN=emrR PE=1 SV=1  
BAC0047|bexA|tr|Q93HR0|Q93HR0\_BACT4 BexA OS=Bacteroides thetaiotaomicron GN=bexA PE=4 SV=1  
BAC0061|cepA|sp|Q8RR17|FIEF\_KLEPN Cation-efflux pump FieF OS=Klebsiella pneumoniae GN=fieF PE=3 SV=1  
BAC0006|acrB|sp|P31224|ACRB\_ECOLI Multidrug efflux pump subunit AcrB OS=Escherichia coli (strain K12) GN=acrB PE=1 SV=1  
BAC0196|iclR|sp|P16528|ICLR\_ECOLI Acetate operon repressor OS=Escherichia coli (strain K12) GN=iclR PE=1 SV=1  
BAC0357|recG|tr|B5L350|B5L350\_9PSED ATP-dependent DNA helicase (Fragment) OS=Pseudomonas corrugata GN=recG PE=4 SV=1  
BAC0364|smrA|tr|C7SLZ1|C7SLZ1\_STEMA ABC-type multidrug efflux pump (Fragment) OS=Stenotrophomonas maltophilia GN=smrA PE=4 SV=1  
BAC0472|adeB|tr|Q93E19|Q93E19\_ACIBA AdeB RND protein OS=Acinetobacter baumannii GN=adeB PE=4 SV=1  
BAC0370|soxR|sp|P0ACS2|SOXR\_ECOLI Redox-sensitive transcriptional activator SoxR OS=Escherichia coli (strain K12) GN=soxR PE=1 SV=1  
BAC0530|phoB|tr|C4X6T6|C4X6T6\_KLEPN Response regulator in two-component regulatory system with PhoQ OS=Klebsiella pneumoniae GN=phoB PE=4 SV=1  
BAC0156|fabI|sp|P0AEK4|FABI\_ECOLI Enoyl-[acyl-carrier-protein] reductase [NADH] FabI OS=Escherichia coli (strain K12) GN=fabI PE=1 SV=1  
BAC0148|emrB|sp|P0AEJ0|EMRB\_ECOLI Multidrug resistance protein B OS=Escherichia coli (strain K12) GN=emrB PE=1 SV=1  
BAC0295|oqxB|tr|Q69HW2|Q69HW2\_ECOLX OqxB integral membrane protein OS=Escherichia coli GN=oqxB PE=4 SV=1  
BAC0039|baeR|sp|P69228|BAER\_ECOLI Transcriptional regulatory protein BaeR OS=Escherichia coli (strain K12) GN=baeR PE=1 SV=1  
BAC0008|acrD/yffA|sp|P24177|ACRD\_ECOLI Probable aminoglycoside efflux pump OS=Escherichia coli (strain K12) GN=acrD PE=1 SV=1  
BAC0149|emrD|sp|P31442|EMRD\_ECOLI Multidrug resistance protein D OS=Escherichia coli (strain K12) GN=emrD PE=1 SV=1  
BAC0494|eefA|tr|A8CY69|A8CY69\_KLEPN EefA OS=Klebsiella pneumoniae GN=eefA PE=4 SV=1  
BAC0541|yieF|sp|P0AGE6|YIEF\_ECOLI Uncharacterized protein YieF OS=Escherichia coli (strain K12) GN=yieF PE=1 SV=1  
BAC0242|mexK|tr|Q9HXW4|Q9HXW4\_PSEAE Probable Resistance-Nodulation-Cell Division (RND) efflux transporter OS=Acinetobacter baumannii GN=mexK PE=4 SV=1  
BAC0181|glpF|sp|P0AER0|GLPF\_ECOLI Glycerol uptake facilitator protein OS=Escherichia coli (strain K12) GN=glpF PE=1 SV=1  
BAC0212|mdtC/yegO|sp|P76399|MDTC\_ECOLI Multidrug resistance protein MdtC OS=Escherichia coli (strain K12) GN=mdtC PE=1 SV=1  
BAC0393|tolC|sp|P02930|TOLC\_ECOLI Outer membrane protein TolC OS=Escherichia coli (strain K12) GN=tolC PE=1 SV=1  
BAC0015|adeG|tr|Q2FD81|Q2FD81\_ACIBA Cation/multidrug efflux pump OS=Acinetobacter baumannii GN=adeG PE=4 SV=1  
BAC0371|soxS|sp|P0A9E2|SOXS\_ECOLI Regulatory protein SoxS OS=Escherichia coli (strain K12) GN=soxS PE=1 SV=1  
BAC0294|oqxA|tr|Q69HW3|Q69HW3\_ECOLX OqxA membrane-fusion protein OS=Escherichia coli GN=oqxA PE=4 SV=1  
BAC0560|marA|sp|P0ACH5|MARA\_ECOLI Multiple antibiotic resistance protein MarA OS=Escherichia coli (strain K12) GN=marA PE=1 SV=1

BAC0334|robA|sp|P0ACI0|ROB\_ECOLI Right origin-binding protein OS=Escherichia coli (strain K12) GN=rob PE=1 SV=1  
BAC0491|kdeA|tr|A6T6T9|A6T6T9\_KLEP7 Multidrug/chloramphenicol efflux transport protein (MFS family) OS=Klebsiella pneumoniae subsp. pneumoniae (strain ATCC 49619) GN=kdeA PE=1 SV=1  
BAC0529|kpnO|tr|C4XBC3|C4XBC3\_KLEPN Outer membrane porin protein C OS=Klebsiella pneumoniae subsp. pneumoniae (strain ATCC 49619) GN=kpnO PE=1 SV=1  
BAC0707|sodB|sp|P0AGD3|SODF\_ECOLI Superoxide dismutase [Fe] OS=Escherichia coli (strain K12) GN=sodB PE=1 SV=1  
BAC0351|sitC|tr|Q9XCS0|Q9XCS0\_SALTM SitC OS=Salmonella typhimurium GN=sitC PE=3 SV=1  
BAC0010|acrF|envD|sp|P24181|ACRF\_ECOLI Acriflavine resistance protein F OS=Escherichia coli (strain K12) GN=acrF PE=1 SV=1  
BAC0172|gadA|sp|P69908|DCEA\_ECOLI Glutamate decarboxylase alpha OS=Escherichia coli (strain K12) GN=gadA PE=1 SV=1  
BAC0218|mdtK|ydhE|sp|P37340|MDTK\_ECOLI Multidrug resistance protein MdtK OS=Escherichia coli (strain K12) GN=mdtK PE=1 SV=1  
BAC0195|ibpB|sp|P0C058|IBPB\_ECOLI Small heat shock protein IbpB OS=Escherichia coli (strain K12) GN=ibpB PE=1 SV=1  
BAC0041|bcr|sp|P28246|BCR\_ECOLI Bicyclomycin resistance protein OS=Escherichia coli (strain K12) GN=bcr PE=1 SV=1  
BAC0531|phoR|tr|C4X6T5|C4X6T5\_KLEPN Sensor kinase in two-component regulatory system with PhoP OS=Klebsiella pneumoniae subsp. pneumoniae (strain ATCC 49619) GN=phoR PE=1 SV=1  
BAC0378|sugE|sp|P69937|SUGE\_ECOLI Quaternary ammonium compound-resistance protein SugE OS=Escherichia coli (strain K12) GN=sugE PE=1 SV=1  
BAC0210|mdtA|yegM|sp|P76397|MDTA\_ECOLI Multidrug resistance protein MdtA OS=Escherichia coli (strain K12) GN=mdtA PE=1 SV=1  
BAC0215|mdtG|yceE|sp|P25744|MDTG\_ECOLI Multidrug resistance protein MdtG OS=Escherichia coli (strain K12) GN=mdtG PE=1 SV=1  
BAC0296|ostA|lptD|sp|P31554|LPTD\_ECOLI LPS-assembly protein LptD OS=Escherichia coli (strain K12) GN=lptD PE=1 SV=1  
BAC0005|acrA|sp|P0AE06|ACRA\_ECOLI Multidrug efflux pump subunit AcrA OS=Escherichia coli (strain K12) GN=acrA PE=1 SV=1  
BAC0185|hdeA|yhiB|sp|P0AES9|HDEA\_ECOLI Acid stress chaperone HdeA OS=Escherichia coli (strain K12) GN=hdeA PE=1 SV=1  
BAC0237|mexD|tr|Q51396|Q51396\_PSEAI RND family exporter MexD OS=Pseudomonas aeruginosa GN=mexD PE=4 SV=1  
BAC0434|ychH|sp|P0AB49|YCHH\_ECOLI Uncharacterized protein YchH OS=Escherichia coli (strain K12) GN=ychH PE=1 SV=1  
BAC0493|kmrA|tr|C4X8X9|C4X8X9\_KLEPN Energy-dependent efflux protein for methyl viologen resistance OS=Klebsiella pneumoniae subsp. pneumoniae (strain ATCC 49619) GN=kmrA PE=1 SV=1  
BAC0496|adeN|tr|B7H1T7|B7H1T7\_ACIB3 Bacterial regulatory protein, tetR family protein OS=Acinetobacter baumannii GN=adeN PE=1 SV=1  
BAC0011|acrR|ybaH|sp|P0ACS9|ACRR\_ECOLI HTH-type transcriptional regulator AcrR OS=Escherichia coli (strain K12) GN=acrR PE=1 SV=1  
BAC0445|ygiW|sp|P0ADU5|YGIW\_ECOLI Protein YgiW OS=Escherichia coli (strain K12) GN=ygiW PE=1 SV=1  
BAC0166|fetB|ybbM|sp|P77307|YBBM\_ECOLI UPF0014 inner membrane protein YbbM OS=Escherichia coli (strain K12) GN=fetB PE=1 SV=1  
BAC0186|hdeB|yhiC|sp|P0AET2|HDEB\_ECOLI Acid stress chaperone HdeB OS=Escherichia coli (strain K12) GN=hdeB PE=1 SV=1  
BAC0565|actR|sp|A6UEL7|ACTR\_SINMW Acid tolerance regulatory protein ActR OS=Sinorhizobium medicae (strain WSM 1021) GN=actR PE=1 SV=1  
BAC0220|mdtN|yjcR|sp|P32716|MDTN\_ECOLI Multidrug resistance protein MdtN OS=Escherichia coli (strain K12) GN=mdtN PE=1 SV=1  
BAC0214|mdtF|yhiV|sp|P37637|MDTF\_ECOLI Multidrug resistance protein MdtF OS=Escherichia coli (strain K12) GN=mdtF PE=1 SV=1  
BAC0477|kpnF|tr|C4X7Z4|C4X7Z4\_KLEPN Spermidine export protein MdtI OS=Klebsiella pneumoniae subsp. pneumoniae (strain ATCC 49619) GN=kpnF PE=1 SV=1  
BAC0134|dpr|dps|sp|P0CB53|DPS\_STRSU DNA protection during starvation protein OS=Streptococcus suis GN=dps PE=1 SV=1  
BAC0177|gadX|sp|P37639|GADX\_ECOLI HTH-type transcriptional regulator GadX OS=Escherichia coli (strain K12) GN=gadX PE=1 SV=1  
BAC0471|adeA|tr|Q93E20|Q93E20\_ACIBA AdeA membrane fusion protein OS=Acinetobacter baumannii GN=adeA PE=1 SV=1  
BAC0384|tehA|sp|P25396|TEHA\_ECOLI Tellurite resistance protein TehA OS=Escherichia coli (strain K12) GN=tehA PE=1 SV=1  
BAC0040|baeS|sp|P30847|BAES\_ECOLI Signal transduction histidine-protein kinase BaeS OS=Escherichia coli (strain K12) GN=baeS PE=1 SV=1  
BAC0213|mdtE|yhiU|sp|P37636|MDTE\_ECOLI Multidrug resistance protein MdtE OS=Escherichia coli (strain K12) GN=mdtE PE=1 SV=1  
BAC0417|vcaM|tr|Q9KKV4|Q9KKV4\_VIBCH ABC transporter, ATP-binding protein OS=Vibrio cholerae serotype O1 (strain ATCC 49619) GN=vcaM PE=1 SV=1  
BAC0476|kpnE|tr|C4X7Z3|C4X7Z3\_KLEPN Multidrug transport protein OS=Klebsiella pneumoniae subsp. pneumoniae (strain ATCC 49619) GN=kpnE PE=1 SV=1  
BAC0176|gadW|yhiW|sp|P63201|GADW\_ECOLI HTH-type transcriptional regulator GadW OS=Escherichia coli (strain K12) GN=gadW PE=1 SV=1  
BAC0009|acrE|envC|sp|P24180|ACRE\_ECOLI Acriflavine resistance protein E OS=Escherichia coli (strain K12) GN=acrE PE=1 SV=1  
BAC0147|emrA|sp|P27303|EMRA\_ECOLI Multidrug resistance protein A OS=Escherichia coli (strain K12) GN=emrA PE=1 SV=1  
BAC0175|gadE|yhiE|sp|P63204|GADE\_ECOLI Transcriptional regulator GadE OS=Escherichia coli (strain K12) GN=gadE PE=1 SV=1  
BAC0385|tehB|sp|P25397|TEHB\_ECOLI Tellurite methyltransferase OS=Escherichia coli (strain K12) GN=tehB PE=1 SV=1  
BAC0495|eefX|tr|A8CY68|A8CY68\_KLEPN EefX OS=Klebsiella pneumoniae GN=eefX PE=4 SV=1  
BAC0492|kexD|tr|A6TA71|A6TA71\_KLEP7 Acridine efflux pump OS=Klebsiella pneumoniae subsp. pneumoniae (strain ATCC 49619) GN=kexD PE=1 SV=1  
BAC0451|yodD|sp|P64519|YODD\_ECOLI Uncharacterized protein YodD OS=Escherichia coli (strain K12) GN=yodD PE=1 SV=1  
BAC0293|ruvB|tr|B5L348|B5L348\_9PSED Malic enzyme family protein (Fragment) OS=Pseudomonas corrugata PE=3 SV=1

BAC0446|yhcN|sp|P64614|YHCN\_ECOLI Uncharacterized protein YhcN OS=Escherichia coli (strain K12) GN=yhcN PE=3 SV=1  
BAC0219|mdtM/yjiO|sp|P39386|MDTM\_ECOLI Multidrug resistance protein MdtM OS=Escherichia coli (strain K12) GN=mdtM PE=3 SV=1  
BAC0208|mdfA/cmr|sp|P0AEY8|MDFA\_ECOLI Multidrug transporter MdfA OS=Escherichia coli (strain K12) GN=mdfA PE=3 SV=1  
BAC0146|emmdR|tr|D5CJ69|D5CJ69\_ENTCC MATE efflux family protein OS=Enterobacter cloacae subsp. cloacae (strain ATCC 35061) GN=emmdR PE=3 SV=1  
BAC0561|marR|sp|P27245|MARR\_ECOLI Multiple antibiotic resistance protein MarR OS=Escherichia coli (strain K12) GN=marR PE=3 SV=1  
BAC0706|sodB|sp|P53641|SODF\_PSEAE Superoxide dismutase [Fe] OS=Pseudomonas aeruginosa (strain ATCC 15692 / DSM 2184) GN=sodB PE=3 SV=1  
BAC0252|mntP/yebN|sp|P76264|MNTP\_ECOLI Probable manganese efflux pump MntP OS=Escherichia coli (strain K12) GN=mntP PE=3 SV=1  
BAC0151|emrK|sp|P52599|EMRK\_ECOLI Multidrug resistance protein K OS=Escherichia coli (strain K12) GN=emrK PE=3 SV=1  
BAC0153|emrY|sp|P52600|EMRY\_ECOLI Multidrug resistance protein Y OS=Escherichia coli (strain K12) GN=emrY PE=3 SV=1  
BAC0450|ymgB/ariR|sp|P75993|ARIR\_ECOLI Probable two-component-system connector protein AriR OS=Escherichia coli (strain K12) GN=ymgB PE=3 SV=1  
BAC0154|evgA|sp|P0ACZ4|EVGA\_ECOLI Positive transcription regulator EvgA OS=Escherichia coli (strain K12) GN=evgA PE=3 SV=1  
BAC0155|evgS|sp|P58402|EVGS\_ECO57 Sensor protein EvgS OS=Escherichia coli O157:H7 GN=evgS PE=3 SV=1  
BAC0217|mdtJ/ebrB/ydgF|sp|Q3Z1V3|MDTJ\_SHISS Spermidine export protein MdtJ OS=Shigella sonnei (strain Ss046) GN=mdtJ PE=3 SV=1  
BAC0165|fetA/ybbL|sp|P77279|YBBL\_ECOLI Uncharacterized ABC transporter ATP-binding protein YbbL OS=Escherichia coli (strain K12) GN=fetA PE=3 SV=1  
BAC0350|sitB|tr|Q9XCS1|Q9XCS1\_SALTM SitB OS=Salmonella typhimurium GN=sitB PE=3 SV=1  
BAC0659|merB|sp|P08664|MERB\_SERMA Alkylmercury lyase OS=Serratia marcescens GN=merB PE=3 SV=1  
BAC0216|mdtI/ydgE|sp|P69210|MDTI\_ECOLI Spermidine export protein MdtI OS=Escherichia coli (strain K12) GN=mdtI PE=3 SV=1  
BAC0353|smdA|tr|A7VN01|A7VN01\_SERMA Multidrug efflux pump SmdA OS=Serratia marcescens GN=smdA PE=3 SV=1  
BAC0359|smeE|tr|I0KXS8|I0KXS8\_STEMA RND efflux system, inner membrane transporter OS=Stenotrophomonas maltophilia (strain ATCC 49619) GN=smeE PE=3 SV=1  
BAC0436|ydeI|sp|P31130|YDEI\_ECOLI Uncharacterized protein YdeI OS=Escherichia coli (strain K12) GN=ydeI PE=4 SV=1  
BAC0447|yjaA|sp|P09162|YJAA\_ECOLI Uncharacterized protein YjaA OS=Escherichia coli (strain K12) GN=yjaA PE=4 SV=1  
BAC0174|gadC/xasA|sp|P63235|GADC\_ECOLI Probable glutamate/gamma-aminobutyrate antiporter OS=Escherichia coli (strain K12) GN=gadC PE=3 SV=1  
BAC0150|emrE/mvrC|sp|P23895|EMRE\_ECOLI Multidrug transporter EmrE OS=Escherichia coli (strain K12) GN=emrE PE=3 SV=1  
BAC0438|ydeP|sp|P77561|YDEP\_ECOLI Protein YdeP OS=Escherichia coli (strain K12) GN=ydeP PE=2 SV=1  
BAC0106|cuiD|sp|Q8ZRS2|CUEO\_SALTY Blue copper oxidase CueO OS=Salmonella typhimurium (strain LT2 / SGSC1) GN=cuiD PE=3 SV=1  
BAC0437|ydeO|sp|P76135|YDEO\_ECOLI HTH-type transcriptional regulator YdeO OS=Escherichia coli (strain K12) GN=ydeO PE=3 SV=1  
BAC0349|sitA|tr|Q9XCS2|Q9XCS2\_SALTI Iron transport protein, periplasmic-binding protein OS=Salmonella typhi GN=sitA PE=3 SV=1  
BAC0135|dpsA|tr|Q8KR86|Q8KR86\_BURPE DpsA OS=Burkholderia pseudomallei GN=dpsA PE=3 SV=1  
BAC0352|sitD|tr|Q9XCR9|Q9XCR9\_SALTM SitD OS=Salmonella typhimurium GN=sitD PE=3 SV=1  
BAC0013|adeE|tr|Q8GKU1|Q8GKU1\_ACIG3 AdeE OS=Acinetobacter sp. 4365 GN=adeE PE=4 SV=2  
BAC0235|mexB|sp|P52002|MEXB\_PSEAE Multidrug resistance protein MexB OS=Pseudomonas aeruginosa (strain ATCC 27956) GN=mexB PE=3 SV=1  
BAC0596|baeR|tr|D0ZNE3|D0ZNE3\_SALT1 DNA-binding transcriptional regulator BaeR OS=Salmonella typhimurium (strain LT2 / SGSC1) GN=baeR PE=3 SV=1  
BAC0337|sdeB|tr|Q84GI9|Q84GI9\_SERMA Putative resistance-nodulation cell division protein SdeB OS=Serratia marcescens GN=sdeB PE=3 SV=1  
BAC0339|sdeY|tr|Q7WSD5|Q7WSD5\_SERMA Multidrug efflux pump SdeY OS=Serratia marcescens GN=sdeY PE=4 SV=1  
BAC0511|vmeD|tr|Q87TN1|Q87TN1\_VIBPA Putative multidrug resistance protein OS=Vibrio parahaemolyticus serotype O1 GN=vmeD PE=3 SV=1  
BAC0595|arsH|tr|P74312|P74312\_SYNY3 Slr0945 protein OS=Synechocystis sp. (strain PCC 6803 / Kazusa) GN=slr0945 PE=3 SV=1  
BAC0239|mexF|tr|Q4KBN7|Q4KBN7\_PSEF5 Multidrug efflux RND transporter, permease protein MexF OS=Pseudomonas aeruginosa (strain ATCC 27956) GN=mexF PE=3 SV=1  
BAC0179|gesB|tr|Q8ZRG9|Q8ZRG9\_SALTY Putative cation efflux system protein OS=Salmonella typhimurium (strain LT2 / SGSC1) GN=gesB PE=3 SV=1  
BAC0038|asr|sp|P36560|ASR\_ECOLI Acid shock protein OS=Escherichia coli (strain K12) GN=asr PE=1 SV=3  
BAC0424|vexB|tr|Q9KVI2|Q9KVI2\_VIBCH Multidrug resistance protein, putative OS=Vibrio cholerae serotype O1 (strain ATCC 35069) GN=vexB PE=3 SV=1  
BAC0012|actP|sp|Q9X5X3|ATCU\_SINMW Copper-transporting P-type ATPase OS=Sinorhizobium medicae (strain WSM 1021) GN=actP PE=3 SV=1  
BAC0157|fabK|tr|Q9FBC5|Q9FBC5\_STREE Trans-2-enoyl-ACP reductase II OS=Streptococcus pneumoniae GN=fabK PE=3 SV=1  
BAC0029|chrF|tr|A4UQR2|A4UQR2\_9RHIZ ChrF OS=Ochrobactrum tritici GN=chrF PE=4 SV=1  
BAC0143|emhB|tr|C1KA85|C1KA85\_PSEFL EmhB OS=Pseudomonas fluorescens GN=emhB PE=4 SV=1  
BAC0290|opmD/nmpC|sp|P37592|OMPD\_SALTY Outer membrane porin protein OpmD OS=Salmonella typhimurium (strain LT2 / SGSC1) GN=opmD PE=3 SV=1  
BAC0650|merA|tr|O08449|O08449\_9PSED Mercuric reductase OS=Pseudomonas sp. K-62 GN=merA PE=4 SV=1

BAC0681|merR2|tr|Q9WWL1|Q9WWL1\_BACSR Mercury resistance operon negative regulator MerR2 OS=Bacillus sp. (strain BAC0681) GN=merR2 PE=3 SV=2

BAC0654|merB1|sp|P16172|MERB\_BACCE Alkylmercury lyase OS=Bacillus cereus GN=merB1 PE=3 SV=2

BAC0222|mepB|sp|P0C070|MEPB\_PSEPU Multidrug/solvent efflux pump membrane transporter MepB OS=Pseudomonas aeruginosa GN=mepB PE=4 SV=1

BAC0435|yddg|emrE|sp|D0ZXP9|YDDG\_SALT1 Methyl viologen resistance protein YddG OS=Salmonella typhimurium GN=yddg PE=4 SV=1

BAC0244|mexT|tr|O87785|O87785\_PSEAI MexT protein OS=Pseudomonas aeruginosa GN=mexT PE=4 SV=1

BAC0705|sodA|sp|P53652|SODM\_PSEAE Superoxide dismutase [Mn] OS=Pseudomonas aeruginosa (strain ATCC 15692) GN=sodA PE=4 SV=1

BAC0246|mexW|tr|Q9HW27|Q9HW27\_PSEAE Probable Resistance-Nodulation-Cell Division (RND) efflux transporter OX19 OS=Pseudomonas aeruginosa GN=mexW PE=4 SV=1

BAC0014|adeF|tr|Q2FD82|Q2FD82\_ACIBA Putative RND family drug transporter OS=Acinetobacter baumannii GN=29\_0014 PE=4 SV=1

BAC0508|adeL|tr|A3M732|A3M732\_ACIBT Transcriptional regulator LysR family OS=Acinetobacter baumannii (strain ATCC 29624) GN=adeL PE=4 SV=1

BAC0656|merB3|tr|Q7DHE7|Q7DHE7\_BACCE Organomercurial lyase enzyme OS=Bacillus cereus GN=merB3 PE=4 SV=2

BAC0478|adeT1|tr|C7F8K6|C7F8K6\_ACIBA AdeT1 OS=Acinetobacter baumannii PE=4 SV=1

BAC0500|emrBsm|tr|B2FID0|B2FID0\_STRMK Putative multidrug resistance protein B OS=Stenotrophomonas maltophilia GN=emrBsm PE=4 SV=1

BAC0240|mexI|tr|Q9HWH4|Q9HWH4\_PSEAE Probable Resistance-Nodulation-Cell Division (RND) efflux transporter OX19 OS=Pseudomonas aeruginosa GN=mexI PE=4 SV=1

BAC0354|smdB|tr|A7VN02|A7VN02\_SERMA Multidrug efflux pump SmdB OS=Serratia marcescens GN=smdB PE=3 SV=1

BAC0661|merB2|tr|Q7DJN2|Q7DJN2\_BACME MerB2 OS=Bacillus megaterium GN=merB2 PE=4 SV=1

BAC0238|mexE|tr|Q1IB41|Q1IB41\_PSEE4 Multidrug efflux RND membrane fusion protein MexE OS=Pseudomonas entomophila GN=mexE PE=4 SV=1

BAC0236|mexC|tr|Q51395|Q51395\_PSEAI Membrane fusion protein MexC OS=Pseudomonas aeruginosa GN=mexC PE=4 SV=1

BAC0367|smvA|emrB|sp|D0ZXQ3|SMVA\_SALT1 Methyl viologen resistance protein SmvA OS=Salmonella typhimurium GN=smvA PE=4 SV=1

BAC0507|tolCsm|tr|R4ITT0|R4ITT0\_STEMA Outer membrane protein OS=Stenotrophomonas maltophilia GN=tolCsm PE=4 SV=1

BAC0016|adeH|tr|Q2FD80|Q2FD80\_ACIBA Putative RND family drug transporter OS=Acinetobacter baumannii GN=29\_0016 PE=4 SV=1

BAC0338|sdeX|tr|Q7WSD6|Q7WSD6\_SERMA Multidrug efflux pump SdeX OS=Serratia marcescens GN=sdeX PE=4 SV=1

BAC0499|emrAsm|tr|B2FIC9|B2FIC9\_STRMK Putative multidrug resistance protein A OS=Stenotrophomonas maltophilia GN=emrAsm PE=4 SV=1

BAC0419|vceB|tr|O51919|O51919\_VIBCL VceB OS=Vibrio cholerae GN=vceB PE=4 SV=1

BAC0184|hasF|tr|Q6GW09|Q6GW09\_SERMA TolC-like protein OS=Serratia marcescens PE=4 SV=1

BAC0657|merB|tr|O07303|O07303\_9PSED Alkylmercury lyase OS=Pseudomonas sp. K-62 GN=merB PE=3 SV=2

BAC0566|actS|tr|Q52912|Q52912\_9RHIZ Histidine protein kinase OS=Sinorhizobium medicae GN=actS PE=4 SV=1

BAC0141|emeA|tr|Q8GR72|Q8GR72\_ENTFL Multidrug efflux pump OS=Enterococcus faecalis GN=emeA PE=4 SV=1

BAC0044|bepE|sp|Q8G2M6|BEPE\_BRUSU Efflux pump membrane transporter BepE OS=Brucella suis biovar 1 (strain 13309) GN=bepE PE=4 SV=1

BAC0502|emrRsm|tr|B2FIC7|B2FIC7\_STRMK Putative MarR-family transcriptional regulator OS=Stenotrophomonas maltophilia GN=emrRsm PE=4 SV=1

BAC0506|pcm|tr|R4IUI7|R4IUI7\_STEMA Protein-L-isoaspartate O-methyltransferase OS=Stenotrophomonas maltophilia GN=pcm PE=4 SV=1

BAC0358|oscA|tr|B6CM35|B6CM35\_9PSED Putative uncharacterized protein oscA OS=Pseudomonas corrugata GN=oscA PE=4 SV=1

BAC0043|bepD|sp|Q8G2M7|BEPD\_BRUSU Efflux pump periplasmic linker BepD OS=Brucella suis biovar 1 (strain 13309) GN=bepD PE=4 SV=1

BAC0207|mdeA|sp|P13254|MEGL\_PSEPU Methionine gamma-lyase OS=Pseudomonas putida GN=mdeA PE=1 SV=2

BAC0159|fabV|sp|Q9KRA3|Y1738\_VIBCH Putative reductase VC\_1738/VC\_1739 OS=Vibrio cholerae serotype O1 (strain 569B) GN=fabV PE=4 SV=1

BAC0145|emhR|tr|Q4KH21|Q4KH21\_PSEF5 Transcriptional regulator EmhR OS=Pseudomonas fluorescens (strain Pf-5 / Pf-6) GN=emhR PE=4 SV=1

BAC0404|ttgA|sp|Q9WWZ9|TTGA\_PSEPT Toluene efflux pump periplasmic linker protein TtgA OS=Pseudomonas putida GN=ttgA PE=4 SV=1

BAC0142|emhA|tr|Q4KH22|Q4KH22\_PSEF5 Efflux transporter, membrane fusion protein subunit EmhA OS=Pseudomonas fluorescens (strain Pf-5 / Pf-6) GN=emhA PE=4 SV=1

BAC0597|baeS|tr|D0ZNE2|D0ZNE2\_SALT1 Signal transduction histidine-protein kinase BaeS OS=Salmonella typhimurium GN=baeS PE=4 SV=1

BAC0027|chrB|tr|A4UQR5|A4UQR5\_9RHIZ ChrB OS=Ochrobactrum tritici GN=chrB PE=4 SV=1

BAC0358|smeD|tr|I0KSX9|I0KSX9\_STEMA Membrane fusion protein of RND family multidrug efflux pump OS=Stenotrophomonas maltophilia GN=smeD PE=4 SV=1

BAC0662|merB3|tr|Q9RHR0|Q9RHR0\_BACME MerB3 OS=Bacillus megaterium GN=merB3 PE=4 SV=2

BAC0144|emhC|tr|Q4KH24|Q4KH24\_PSEF5 Efflux transporter, outer membrane factor lipoprotein EmhC OS=Pseudomonas fluorescens (strain Pf-5 / Pf-6) GN=emhC PE=4 SV=1

BAC0538|chrR|tr|Q7BD45|Q7BD45\_PSEPU Chromate reductase OS=Pseudomonas putida GN=chrR PE=4 SV=1

BAC0248|mexY|tr|Q9ZNG8|Q9ZNG8\_PSEAI MexY OS=Pseudomonas aeruginosa GN=mexY PE=4 SV=1

BAC0362|smeT|tr|Q5MXJ5|Q5MXJ5\_STEMA Repressor SmeT OS=Stenotrophomonas maltophilia GN=smeT PE=4 SV=1

BAC0498|ideR|sp|P0A672|IDER\_MYCTU Iron-dependent repressor IdeR OS=Mycobacterium tuberculosis GN=ideR PE=4 SV=1

BAC0473|adeC|tr|Q93E18|Q93E18\_ACIBA AdeC outer membrane protein OS=Acinetobacter baumannii GN=adeC PE=4  
BAC0173|gadB|sp|P69910|DCEB\_ECOLI Glutamate decarboxylase beta OS=Escherichia coli (strain K12) GN=gadB PE=4  
BAC0360|smeF|tr|Q9F239|Q9F239\_STEMA Outer membrane protein OS=Stenotrophomonas maltophilia GN=smeF PE=4  
BAC0223|mepC|sp|P0C071|MEPC\_PSEPU Multidrug/solvent efflux pump outer membrane protein MepC OS=Pseudomonas  
BAC0292|oprM|oprK|sp|Q51487|OPRM\_PSEAE Outer membrane protein OprM OS=Pseudomonas aeruginosa (strain ATCC 27956)  
BAC0501|emrCsm|tr|B2FIC8|B2FIC8\_STRMK Putative outer membrane multidrug efflux protein OS=Stenotrophomonas  
BAC0418|vceA|tr|O51918|O51918\_VIBCL VceA OS=Vibrio cholerae GN=vceA PE=4 SV=1  
BAC0505|farR|tr|Q7DD70|Q7DD70\_NEIMB Transcriptional regulator, MarR family OS=Neisseria meningitidis serogroup  
BAC0190|hmrR|sp|Q9X5X4|HMRR\_SINMW HTH-type transcriptional regulator HmrR OS=Sinorhizobium medicae (strain  
BAC0313|pmpM|sp|Q9I3Y3|PMPM\_PSEAE Multidrug resistance protein PmpM OS=Pseudomonas aeruginosa (strain ATCC  
BAC0258|mtrD|tr|Q5F725|Q5F725\_NEIG1 Antibiotic resistance efflux pump component OS=Neisseria gonorrhoeae (strain  
BAC0028|chrC|tr|A4UQR3|A4UQR3\_9RHIZ Superoxide dismutase OS=Ochrobactrum tritici GN=chrC PE=3 SV=1  
BAC0411|ttgH|sp|Q93PU4|TTGH\_PSEPT Toluene efflux pump membrane transporter TtgH OS=Pseudomonas putida (strain  
BAC0375|srpR|sp|Q9R9T9|SRPR\_PSEPU HTH-type transcriptional regulator SrpR OS=Pseudomonas putida GN=srpR PE=4  
BAC0046|bepG|sp|Q8FWV9|BEPG\_BRUSU Efflux pump membrane transporter BepG OS=Brucella suis biovar 1 (strain 1330)  
BAC0229|merG|tr|O07302|O07302\_9PSED Mercuric resistance protein OS=Pseudomonas sp. K-62 GN=merG PE=4 SV=2  
BAC0481|pdrM|sp|Q8DPQ6|NORM\_STRR6 Probable multidrug resistance protein NorM OS=Streptococcus pneumoniae (strain  
BAC0562|oprN|tr|P95423|P95423\_PSEAI Uncharacterized protein OS=Pseudomonas aeruginosa GN=oprN PE=4 SV=1  
BAC0479|adeT2|tr|C7F8K7|C7F8K7\_ACIBA AdeT2 OS=Acinetobacter baumannii PE=4 SV=1  
BAC0363|smfY|tr|Q2AAU2|Q2AAU2\_SERMA Multidrug efflux pump SmfY OS=Serratia marcescens GN=smfY PE=4 SV=1  
BAC0430|vmeB|tr|Q2AAU3|Q2AAU3\_VIBPH Inner membrane protein VmeB OS=Vibrio parahaemolyticus GN=vmeB PE=4 SV=1  
BAC0241|mexJ|tr|Q9HXW3|Q9HXW3\_PSEAE Probable Resistance-Nodulation-Cell Division (RND) efflux membrane fu  
BAC0510|vmeC|tr|Q87TN0|Q87TN0\_VIBPA Uncharacterized protein OS=Vibrio parahaemolyticus serotype O3:K6 (strain  
BAC0245|mexV|tr|Q9HW28|Q9HW28\_PSEAE Probable Resistance-Nodulation-Cell Division (RND) efflux membrane fu  
BAC0234|mexA|sp|P52477|MEXA\_PSEAE Multidrug resistance protein MexA OS=Pseudomonas aeruginosa (strain ATCC  
BAC0503|farA|tr|Q9RQ30|Q9RQ30\_NEIGO Efflux pump protein FarA OS=Neisseria gonorrhoeae PE=4 SV=1  
BAC0202|lde|tr|G2JVL2|G2JVL2\_LISMN Efflux pump Lde OS=Listeria monocytogenes J0161 GN=LMOG\_01756 PE=4  
BAC0042|bepC|sp|Q8G0Y6|BEPG\_BRUSU Outer membrane efflux protein BepC OS=Brucella suis biovar 1 (strain 1330)  
BAC0412|ttgI|sp|Q93PU3|TTGI\_PSEPT Toluene efflux pump outer membrane protein TtgI OS=Pseudomonas putida (strain  
BAC0291|oprJ|sp|Q51397|OPRJ\_PSEAE Outer membrane protein OprJ OS=Pseudomonas aeruginosa (strain ATCC 15692)  
BAC0504|farB|tr|Q9RQ29|Q9RQ29\_NEIGO Efflux pump protein FarB OS=Neisseria gonorrhoeae PE=4 SV=1  
BAC0260|mtrF|tr|B4RN92|B4RN92\_NEIG2 Antibiotic resistance efflux pump component OS=Neisseria gonorrhoeae (strain  
BAC0613|cmeB|tr|Q8RTE4|Q8RTE4\_CAMJU CmeB OS=Campylobacter jejuni GN=cmeB PE=4 SV=1  
BAC0380|tbtB|tr|Q71UZ6|Q71UZ6\_PSEST Resistance nodulation cell division family member TbtB OS=Pseudomonas stut  
BAC0405|ttgB|sp|O52248|TTGB\_PSEPT Toluene efflux pump membrane transporter TtgB OS=Pseudomonas putida (strain  
BAC0688|merR2|tr|Q79B70|Q79B70\_PSEST Organomercurial resistance regulatory protein OS=Pseudomonas stutzeri GN  
BAC0018|adeJ|tr|Q24LT7|Q24LT7\_ACIBA AdeJ OS=Acinetobacter baumannii GN=adeJ PE=4 SV=1  
BAC0648|merA|sp|P08662|MERA\_SERMA Mercuric reductase (Fragments) OS=Serratia marcescens GN=merA PE=3 SV=1  
BAC0322|qacE|sp|P0AGC9|QACE\_ECOLX Quaternary ammonium compound-resistance protein QacE OS=Escherichia coli  
BAC0324|qacF|sp|Q9X2N9|QACF\_ENTAE Quaternary ammonium compound-resistance protein QacF OS=Enterobacter aerogenes  
BAC0019|adeK|tr|Q24LT6|Q24LT6\_ACIBA AdeK OS=Acinetobacter baumannii GN=adeK PE=4 SV=1  
BAC0323|qacEdelta1|tr|Q7BQY4|Q7BQY4\_PSEAI Disinfectant resistance protein OS=Pseudomonas aeruginosa GN=qacE  
BAC0017|adeI|tr|Q2FD95|Q2FD95\_ACIBA AdeI OS=Acinetobacter baumannii GN=adeI PE=4 SV=1  
BAC0001|abeM|tr|Q5FAM9|Q5FAM9\_ACIBA Multidrug efflux pump AbeM OS=Acinetobacter baumannii GN=abeM PE=4 SV=1  
BAC0472|adeB|tr|Q93E19|Q93E19\_ACIBA AdeB RND protein OS=Acinetobacter baumannii GN=adeB PE=4 SV=1  
BAC0335|rpoS|sp|P35540|RPOS\_SHIFL RNA polymerase sigma factor RpoS OS=Shigella flexneri GN=rpoS PE=3 SV=3



BAC0536|oxyRkp|tr|C4WZN6|C4WZN6\_KLEPN Activator of hydrogen peroxide-inducible genes OS=Klebsiella pneumoniae GN=oxyR PE=1 SV=1

BAC0357|recG|tr|B5L350|B5L350\_9PSED ATP-dependent DNA helicase (Fragment) OS=Pseudomonas corrugata GN=recG PE=1 SV=1

BAC0194|ibpA|sp|P0C054|IBPA\_ECOLI Small heat shock protein IbpA OS=Escherichia coli (strain K12) GN=ibpA PE=1 SV=1

BAC0185|hdeA|yhiB|sp|P0AES9|HDEA\_ECOLI Acid stress chaperone HdeA OS=Escherichia coli (strain K12) GN=hdeA PE=1 SV=1

BAC0564|actP|yjcG|sp|P32705|ACTP\_ECOLI Cation/acetate symporter ActP OS=Escherichia coli (strain K12) GN=actP PE=1 SV=1

BAC0368|sodA|sp|P00448|SODM\_ECOLI Superoxide dismutase [Mn] OS=Escherichia coli (strain K12) GN=sodA PE=1 SV=1

BAC0533|cpxR|tr|C4WZK6|C4WZK6\_KLEPN Response regulator of stress-related two-component regulatory system OS=Klebsiella pneumoniae GN=cpxR PE=1 SV=1

BAC0471|adeA|tr|Q93E20|Q93E20\_ACIBA AdeA membrane fusion protein OS=Acinetobacter baumannii GN=adeA PE=4 SV=1

BAC0175|gadE|yhiE|sp|P63204|GADE\_ECOLI Transcriptional regulator GadE OS=Escherichia coli (strain K12) GN=gadE PE=1 SV=1

BAC0559|emrR|sp|P0ACR9|MPRA\_ECOLI Transcriptional repressor MprA OS=Escherichia coli (strain K12) GN=emrR PE=1 SV=1

BAC0532|cpxA|tr|C4WZK5|C4WZK5\_KLEPN Sensor protein of stress-related two-component regulatory system OS=Klebsiella pneumoniae GN=cpxA PE=1 SV=1

BAC0181|glpF|sp|P0AER0|GLPF\_ECOLI Glycerol uptake facilitator protein OS=Escherichia coli (strain K12) GN=glpF PE=1 SV=1

BAC0047|bexA|tr|Q93HR0|Q93HR0\_BACT4 BexA OS=Bacteroides thetaiotaomicron GN=bexA PE=4 SV=1

BAC0177|gadX|sp|P37639|GADX\_ECOLI HTH-type transcriptional regulator GadX OS=Escherichia coli (strain K12) GN=gadX PE=1 SV=1

BAC0293|ruvB|tr|B5L348|B5L348\_9PSED Malic enzyme family protein (Fragment) OS=Pseudomonas corrugata GN=ruvB PE=3 SV=1

BAC0196|iclR|sp|P16528|ICLR\_ECOLI Acetate operon repressor OS=Escherichia coli (strain K12) GN=iclR PE=1 SV=1

BAC0172|gadA|sp|P69908|DCEA\_ECOLI Glutamate decarboxylase alpha OS=Escherichia coli (strain K12) GN=gadA PE=1 SV=1

BAC0148|emrB|sp|P0AEJ0|EMRB\_ECOLI Multidrug resistance protein B OS=Escherichia coli (strain K12) GN=emrB PE=1 SV=1

BAC0370|soxR|sp|P0ACS2|SOXR\_ECOLI Redox-sensitive transcriptional activator SoxR OS=Escherichia coli (strain K12) GN=soxR PE=1 SV=1

BAC0149|emrD|sp|P31442|EMRD\_ECOLI Multidrug resistance protein D OS=Escherichia coli (strain K12) GN=emrD PE=1 SV=1

BAC0530|phoB|tr|C4X6T6|C4X6T6\_KLEPN Response regulator in two-component regulatory system with PhoQ OS=Klebsiella pneumoniae GN=phoB PE=1 SV=1

BAC0006|acrB|sp|P31224|ACRB\_ECOLI Multidrug efflux pump subunit AcrB OS=Escherichia coli (strain K12) GN=acrB PE=1 SV=1

BAC0541|yieF|sp|P0AGE6|YIEF\_ECOLI Uncharacterized protein YieF OS=Escherichia coli (strain K12) GN=yieF PE=1 SV=1

BAC0176|gadW|yhiW|sp|P63201|GADW\_ECOLI HTH-type transcriptional regulator GadW OS=Escherichia coli (strain K12) GN=gadW PE=1 SV=1

BAC0195|ibpB|sp|P0C058|IBPB\_ECOLI Small heat shock protein IbpB OS=Escherichia coli (strain K12) GN=ibpB PE=1 SV=1

BAC0242|mexK|tr|Q9HXW4|Q9HXW4\_PSEAE Probable Resistance-Nodulation-Cell Division (RND) efflux transporter OS=Klebsiella pneumoniae GN=mexK PE=1 SV=1

BAC0371|soxS|sp|P0A9E2|SOXS\_ECOLI Regulatory protein SoxS OS=Escherichia coli (strain K12) GN=soxS PE=1 SV=1

BAC0214|mdtF|yhiV|sp|P37637|MDTF\_ECOLI Multidrug resistance protein MdtF OS=Escherichia coli (strain K12) GN=mdtF PE=1 SV=1

BAC0061|cepA|sp|Q8RR17|FIEF\_KLEPN Cation-efflux pump FieF OS=Klebsiella pneumoniae GN=fieF PE=3 SV=1

BAC0334|robA|sp|P0ACI0|ROB\_ECOLI Right origin-binding protein OS=Escherichia coli (strain K12) GN=robA PE=1 SV=1

BAC0005|acrA|sp|P0AE06|ACRA\_ECOLI Multidrug efflux pump subunit AcrA OS=Escherichia coli (strain K12) GN=acrA PE=1 SV=1

BAC0445|ygiW|sp|P0ADU5|YGIW\_ECOLI Protein YgiW OS=Escherichia coli (strain K12) GN=ygiW PE=1 SV=1

BAC0156|fabI|sp|P0AEK4|FABI\_ECOLI Enoyl-[acyl-carrier-protein] reductase [NADH] FabI OS=Escherichia coli (strain K12) GN=fabI PE=1 SV=1

BAC0186|hdeB|yhiC|sp|P0AET2|HDEB\_ECOLI Acid stress chaperone HdeB OS=Escherichia coli (strain K12) GN=hdeB PE=1 SV=1

BAC0211|mdtB|yegN|sp|P76398|MDTB\_ECOLI Multidrug resistance protein MdtB OS=Escherichia coli (strain K12) GN=mdtB PE=1 SV=1

BAC0010|acrF|envD|sp|P24181|ACRF\_ECOLI Acriflavine resistance protein F OS=Escherichia coli (strain K12) GN=acrF PE=1 SV=1

BAC0008|acrD|yffA|sp|P24177|ACRD\_ECOLI Probable aminoglycoside efflux pump OS=Escherichia coli (strain K12) GN=acrD PE=1 SV=1

BAC0213|mdtE|yhiU|sp|P37636|MDTE\_ECOLI Multidrug resistance protein MdtE OS=Escherichia coli (strain K12) GN=mdtE PE=1 SV=1

BAC0212|mdtC|yegO|sp|P76399|MDTC\_ECOLI Multidrug resistance protein MdtC OS=Escherichia coli (strain K12) GN=mdtC PE=1 SV=1

BAC0039|baeR|sp|P69228|BAER\_ECOLI Transcriptional regulatory protein BaeR OS=Escherichia coli (strain K12) GN=baeR PE=1 SV=1

BAC0560|marA|sp|P0ACH5|MARA\_ECOLI Multiple antibiotic resistance protein MarA OS=Escherichia coli (strain K12) GN=marA PE=1 SV=1

BAC0296|ostA|lptD|sp|P31554|LPTD\_ECOLI LPS-assembly protein LptD OS=Escherichia coli (strain K12) GN=lptD PE=1 SV=1

BAC0295|oqxB|tr|Q69HW2|Q69HW2\_ECOLX OqxB integral membrane protein OS=Escherichia coli GN=oxqB PE=4 SV=1

BAC0220|mdtN|yjcR|sp|P32716|MDTN\_ECOLI Multidrug resistance protein MdtN OS=Escherichia coli (strain K12) GN=mdtN PE=1 SV=1

BAC0218|mdtK|ydhE|sp|P37340|MDTK\_ECOLI Multidrug resistance protein MdtK OS=Escherichia coli (strain K12) GN=mdtK PE=1 SV=1

BAC0434|ychH|sp|P0AB49|YCHH\_ECOLI Uncharacterized protein YchH OS=Escherichia coli (strain K12) GN=yehH PE=1 SV=1

BAC0215|mdtG/yceE|sp|P25744|MDTG\_ECOLI Multidrug resistance protein MdtG OS=Escherichia coli (strain K12) GN=mdtG PE=1 SV=1  
BAC0147|emrA|sp|P27303|EMRA\_ECOLI Multidrug resistance protein A OS=Escherichia coli (strain K12) GN=emrA PE=1 SV=1  
BAC0364|smrA|tr|C7SLZ1|C7SLZ1\_STEMA ABC-type multidrug efflux pump (Fragment) OS=Stenotrophomonas maltophilia GN=smrA PE=1 SV=1  
BAC0015|adeG|tr|Q2FD81|Q2FD81\_ACIBA Cation/multidrug efflux pump OS=Acinetobacter baumannii GN=adeG PE=1 SV=1  
BAC0496|adeN|tr|B7H1T7|B7H1T7\_ACIB3 Bacterial regulatory protein, tetR family protein OS=Acinetobacter baumannii GN=adeN PE=1 SV=1  
BAC0393|tolC|sp|P02930|TOLC\_ECOLI Outer membrane protein TolC OS=Escherichia coli (strain K12) GN=tolC PE=1 SV=1  
BAC0378|sugE|sp|P69937|SUGE\_ECOLI Quaternary ammonium compound-resistance protein SugE OS=Escherichia coli (strain K12) GN=sugE PE=1 SV=1  
BAC0495|eefX|tr|A8CY68|A8CY68\_KLEPN EefX OS=Klebsiella pneumoniae GN=eefX PE=4 SV=1  
BAC0450|yngB|ariR|sp|P75993|ARIR\_ECOLI Probable two-component-system connector protein AriR OS=Escherichia coli (strain K12) GN=yngB PE=1 SV=1  
BAC0009|acrE/envC|sp|P24180|ACRE\_ECOLI Acriflavine resistance protein E OS=Escherichia coli (strain K12) GN=acrE PE=1 SV=1  
BAC0561|marR|sp|P27245|MARR\_ECOLI Multiple antibiotic resistance protein MarR OS=Escherichia coli (strain K12) GN=marR PE=1 SV=1  
BAC0706|sodB|sp|P53641|SODF\_PSEAE Superoxide dismutase [Fe] OS=Pseudomonas aeruginosa (strain ATCC 15692 / DSM 2184) GN=sodB PE=1 SV=1  
BAC0040|baeS|sp|P30847|BAES\_ECOLI Signal transduction histidine-protein kinase BaeS OS=Escherichia coli (strain K12) GN=baeS PE=1 SV=1  
BAC0446|yhcN|sp|P64614|YHCN\_ECOLI Uncharacterized protein YhcN OS=Escherichia coli (strain K12) GN=yhcN PE=1 SV=1  
BAC0165|fetA/ybbL|sp|P77279|YBBL\_ECOLI Uncharacterized ABC transporter ATP-binding protein YbbL OS=Escherichia coli (strain K12) GN=fetA PE=1 SV=1  
BAC0207|mdeA|sp|P13254|MEGL\_PSEPU Methionine gamma-lyase OS=Pseudomonas putida GN=mdeA PE=1 SV=2  
BAC0041|bcr|sp|P28246|BCR\_ECOLI Bicyclomycin resistance protein OS=Escherichia coli (strain K12) GN=bcr PE=1 SV=1  
BAC0219|mdtM/yjiO|sp|P39386|MDTM\_ECOLI Multidrug resistance protein MdtM OS=Escherichia coli (strain K12) GN=mdtM PE=1 SV=1  
BAC0166|fetB/ybbM|sp|P77307|YBBM\_ECOLI UPF0014 inner membrane protein YbbM OS=Escherichia coli (strain K12) GN=fetB PE=1 SV=1  
BAC0222|mepB|sp|P0C070|MEPB\_PSEPU Multidrug/solvent efflux pump membrane transporter MepB OS=Pseudomonas putida GN=mepB PE=1 SV=1  
BAC0384|tehA|sp|P25396|TEHA\_ECOLI Tellurite resistance protein TehA OS=Escherichia coli (strain K12) GN=tehA PE=1 SV=1  
BAC0210|mdtA/yegM|sp|P76397|MDTA\_ECOLI Multidrug resistance protein MdtA OS=Escherichia coli (strain K12) GN=mdtA PE=1 SV=1  
BAC0174|gadC/xasA|sp|P63235|GADC\_ECOLI Probable glutamate/gamma-aminobutyrate antiporter OS=Escherichia coli (strain K12) GN=gadC PE=1 SV=1  
BAC0150|emrE/mvrC|sp|P23895|EMRE\_ECOLI Multidrug transporter EmrE OS=Escherichia coli (strain K12) GN=emrE PE=1 SV=1  
BAC0707|sodB|sp|P0AGD3|SODF\_ECOLI Superoxide dismutase [Fe] OS=Escherichia coli (strain K12) GN=sodB PE=1 SV=1  
BAC0151|emrK|sp|P52599|EMRK\_ECOLI Multidrug resistance protein K OS=Escherichia coli (strain K12) GN=emrK PE=1 SV=1  
BAC0494|eefA|tr|A8CY69|A8CY69\_KLEPN EefA OS=Klebsiella pneumoniae GN=eefA PE=4 SV=1  
BAC0155|evgS|sp|P58402|EVGS\_ECO57 Sensor protein EvgS OS=Escherichia coli O157:H7 GN=evgS PE=3 SV=1  
BAC0294|oqxA|tr|Q69HW3|Q69HW3\_ECOLX OqxA membrane-fusion protein OS=Escherichia coli GN=oxqA PE=4 SV=1  
BAC0239|mexF|tr|Q4KBN7|Q4KBN7\_PSEF5 Multidrug efflux RND transporter, permease protein MexF OS=Pseudomonas putida GN=mexF PE=1 SV=1  
BAC0153|emrY|sp|P52600|EMRY\_ECOLI Multidrug resistance protein Y OS=Escherichia coli (strain K12) GN=emrY PE=1 SV=1  
BAC0154|evgA|sp|P0ACZ4|EVGA\_ECOLI Positive transcription regulator EvgA OS=Escherichia coli (strain K12) GN=evgA PE=1 SV=1  
BAC0437|ydeO|sp|P76135|YDEO\_ECOLI HTH-type transcriptional regulator YdeO OS=Escherichia coli (strain K12) GN=ydeO PE=1 SV=1  
BAC0134|dpr/dps|sp|P0CB53|DPS\_STRSU DNA protection during starvation protein OS=Streptococcus suis GN=dps PE=1 SV=1  
BAC0491|kdeA|tr|A6T6T9|A6T6T9\_KLEP7 Multidrug/chloramphenicol efflux transport protein (MFS family) OS=Klebsiella pneumoniae GN=kdeA PE=1 SV=1  
BAC0208|mdfA/cmr|sp|P0AEY8|MDFA\_ECOLI Multidrug transporter MdfA OS=Escherichia coli (strain K12) GN=mdfA PE=1 SV=1  
BAC0216|mdtI/ydgE|sp|P69210|MDTI\_ECOLI Spermidine export protein MdtI OS=Escherichia coli (strain K12) GN=mdtI PE=1 SV=1  
BAC0038|asr|sp|P36560|ASR\_ECOLI Acid shock protein OS=Escherichia coli (strain K12) GN=asr PE=1 SV=3  
BAC0011|acrR/ybaH|sp|P0ACS9|ACRR\_ECOLI HTH-type transcriptional regulator AcrR OS=Escherichia coli (strain K12) GN=acrR PE=1 SV=1  
BAC0529|kpnO|tr|C4XBC3|C4XBC3\_KLEPN Outer membrane porin protein C OS=Klebsiella pneumoniae subsp. pneumoniae GN=kpnO PE=1 SV=1  
BAC0013|adeE|tr|Q8GKU1|Q8GKU1\_ACIG3 AdeE OS=Acinetobacter sp. 4365 GN=adeE PE=4 SV=2  
BAC0531|phoR|tr|C4X6T5|C4X6T5\_KLEPN Sensor kinase in two-component regulatory system with PhoP OS=Klebsiella pneumoniae GN=phoR PE=1 SV=1  
BAC0385|tehB|sp|P25397|TEHB\_ECOLI Tellurite methyltransferase OS=Escherichia coli (strain K12) GN=tehB PE=1 SV=1  
BAC0451|yodD|sp|P64519|YODD\_ECOLI Uncharacterized protein YodD OS=Escherichia coli (strain K12) GN=yodD PE=1 SV=1  
BAC0436|ydeI|sp|P31130|YDEI\_ECOLI Uncharacterized protein YdeI OS=Escherichia coli (strain K12) GN=ydeI PE=4 SV=1  
BAC0217|mdtJ|ebrB/ydgF|sp|Q3Z1V3|MDTJ\_SHISS Spermidine export protein MdtJ OS=Shigella sonnei (strain Ss046) GN=mdtJ PE=1 SV=1

BAC0659|merB|sp|P08664|MERB\_SERMA Alkylmercury lyase OS=Serratia marcescens GN=merB PE=3 SV=1  
BAC0351|sitC|tr|Q9XCS0|Q9XCS0\_SALTM SitC OS=Salmonella typhimurium GN=sitC PE=3 SV=1  
BAC0252|mntP/yebN|sp|P76264|MNTP\_ECOLI Probable manganese efflux pump MntP OS=Escherichia coli (strain K12)  
BAC0438|ydeP|sp|P77561|YDEP\_ECOLI Protein YdeP OS=Escherichia coli (strain K12) GN=ydeP PE=2 SV=1  
BAC0223|mepC|sp|P0C071|MEPC\_PSEPU Multidrug/solvent efflux pump outer membrane protein MepC OS=Pseudomonas  
BAC0238|mexE|tr|Q1IB41|Q1IB41\_PSEE4 Multidrug efflux RND membrane fusion protein MexE OS=Pseudomonas entomophila  
BAC0476|kpnE|tr|C4X7Z3|C4X7Z3\_KLEPN Multidrug transport protein OS=Klebsiella pneumoniae subsp. pneumoniae N  
BAC0157|fabK|tr|Q9FBC5|Q9FBC5\_STREE Trans-2-enoyl-ACP reductase II OS=Streptococcus pneumoniae GN=fabK PE=3 SV=1  
BAC0447|yjaA|sp|P09162|YJAA\_ECOLI Uncharacterized protein YjaA OS=Escherichia coli (strain K12) GN=yjaA PE=4 SV=1  
BAC0246|mexW|tr|Q9HW27|Q9HW27\_PSEAE Probable Resistance-Nodulation-Cell Division (RND) efflux transporter O  
BAC0417|vcaM|tr|Q9KKV4|Q9KKV4\_VIBCH ABC transporter, ATP-binding protein OS=Vibrio cholerae serotype O1 (strain 569B)  
BAC0508|adeL|tr|A3M732|A3M732\_ACIBT Transcriptional regulator LysR family OS=Acinetobacter baumannii (strain ATCC 29624)  
BAC0349|sitA|tr|Q9XCS2|Q9XCS2\_SALTI Iron transport protein, periplasmic-binding protein OS=Salmonella typhi GN=sitA PE=3 SV=1  
BAC0477|kpnF|tr|C4X7Z4|C4X7Z4\_KLEPN Spermidine export protein MdtI OS=Klebsiella pneumoniae subsp. pneumoniae N  
BAC0237|mexD|tr|Q51396|Q51396\_PSEAI RND family exporter MexD OS=Pseudomonas aeruginosa GN=mexD PE=4 SV=1  
BAC0353|smdA|tr|A7VN01|A7VN01\_SERMA Multidrug efflux pump SmdA OS=Serratia marcescens GN=smdA PE=3 SV=1  
BAC0493|kmrA|tr|C4X8X9|C4X8X9\_KLEPN Energy-dependent efflux protein for methyl viologen resistance OS=Klebsiella pneumoniae subsp. pneumoniae N  
BAC0106|cuiD|sp|Q8ZRS2|CUEO\_SALTY Blue copper oxidase CueO OS=Salmonella typhimurium (strain LT2 / SGSC1422)  
BAC0143|emhB|tr|C1KA85|C1KA85\_PSEFL EmhB OS=Pseudomonas fluorescens GN=emhB PE=4 SV=1  
BAC0012|actP|sp|Q9X5X3|ATCU\_SINMW Copper-transporting P-type ATPase OS=Sinorhizobium medicae (strain WSM 1021)  
BAC0014|adeF|tr|Q2FD82|Q2FD82\_ACIBA Putative RND family drug transporter OS=Acinetobacter baumannii GN=29624 SV=1  
BAC0565|actR|sp|A6UEL7|ACTR\_SINMW Acid tolerance regulatory protein ActR OS=Sinorhizobium medicae (strain WSM 1021)  
BAC0478|adeT1|tr|C7F8K6|C7F8K6\_ACIBA AdeT1 OS=Acinetobacter baumannii PE=4 SV=1  
BAC0244|mexT|tr|O87785|O87785\_PSEAI MexT protein OS=Pseudomonas aeruginosa GN=mexT PE=4 SV=1  
BAC0146|emmdR|tr|D5CJ69|D5CJ69\_ENTCC MATE efflux family protein OS=Enterobacter cloacae subsp. cloacae (strain ATCC 35061)  
BAC0350|sitB|tr|Q9XCS1|Q9XCS1\_SALTM SitB OS=Salmonella typhimurium GN=sitB PE=3 SV=1  
BAC0240|mexI|tr|Q9HWH4|Q9HWH4\_PSEAE Probable Resistance-Nodulation-Cell Division (RND) efflux transporter O  
BAC0492|kexD|tr|A6TA71|A6TA71\_KLEP7 Acridine efflux pump OS=Klebsiella pneumoniae subsp. pneumoniae (strain ATCC 35061)  
BAC0359|smeE|tr|I0KXS8|I0KXS8\_STEMA RND efflux system, inner membrane transporter OS=Stenotrophomonas maltophilia  
BAC0404|ttgA|sp|Q9WWZ9|TTGA\_PSEPT Toluene efflux pump periplasmic linker protein TtgA OS=Pseudomonas putida  
BAC0290|opmD|nmpC|sp|P37592|OMPD\_SALTY Outer membrane porin protein OmpD OS=Salmonella typhimurium (strain LT2 / SGSC1422)  
BAC0654|merB1|sp|P16172|MERB\_BACCE Alkylmercury lyase OS=Bacillus cereus GN=merB1 PE=3 SV=2  
BAC0235|mexB|sp|P52002|MEXB\_PSEAE Multidrug resistance protein MexB OS=Pseudomonas aeruginosa (strain ATCC 27962)  
BAC0681|merR2|tr|Q9WWL1|Q9WWL1\_BACSR Mercury resistance operon negative regulator MerR2 OS=Bacillus sp. (strain ATCC 25618)  
BAC0135|dpsA|tr|Q8KR86|Q8KR86\_BURPE DpsA OS=Burkholderia pseudomallei GN=dpsA PE=3 SV=1  
BAC0144|emhC|tr|Q4KH24|Q4KH24\_PSEF5 Efflux transporter, outer membrane factor lipoprotein EmhC OS=Pseudomonas fluorescens  
BAC0435|yddg/emrE|sp|D0ZXP9|YDDG\_SALT1 Methyl viologen resistance protein YddG OS=Salmonella typhimurium GN=yddg/emrE PE=3 SV=1  
BAC0595|arsH|tr|P74312|P74312\_SYNY3 Slr0945 protein OS=Synechocystis sp. (strain PCC 6803 / Kazusa) GN=slr0945 SV=1  
BAC0511|vmeD|tr|Q87TN1|Q87TN1\_VIBPA Putative multidrug resistance protein OS=Vibrio parahaemolyticus serotype O1 (strain 569B)  
BAC0184|hasF|tr|Q6GW09|Q6GW09\_SERMA TolC-like protein OS=Serratia marcescens PE=4 SV=1  
BAC0656|merB3|tr|Q7DHE7|Q7DHE7\_BACCE Organomercurial lyase enzyme OS=Bacillus cereus GN=merB3 PE=4 SV=1  
BAC0424|vexB|tr|Q9KVI2|Q9KVI2\_VIBCH Multidrug resistance protein, putative OS=Vibrio cholerae serotype O1 (strain 569B)  
BAC0179|gesB|tr|Q8ZRG9|Q8ZRG9\_SALTY Putative cation efflux system protein OS=Salmonella typhimurium (strain LT2 / SGSC1422)  
BAC0339|sdeY|tr|Q7WSD5|Q7WSD5\_SERMA Multidrug efflux pump SdeY OS=Serratia marcescens GN=sdeY PE=4 SV=1  
BAC0705|sodA|sp|P53652|SODM\_PSEAE Superoxide dismutase [Mn] OS=Pseudomonas aeruginosa (strain ATCC 27962)  
BAC0661|merB2|tr|Q7DJN2|Q7DJN2\_BACME MerB2 OS=Bacillus megaterium GN=merB2 PE=4 SV=1

BAC0145|emhR|tr|Q4KH21|Q4KH21\_PSEF5 Transcriptional regulator EmhR OS=Pseudomonas fluorescens (strain Pf-5 /  
BAC0352|sitD|tr|Q9XCR9|Q9XCR9\_SALTM SitD OS=Salmonella typhimurium GN=sitD PE=3 SV=1  
BAC0016|adeH|tr|Q2FD80|Q2FD80\_ACIBA Putative RND family drug transporter OS=Acinetobacter baumannii GN=29\_  
BAC0367|smvA|emrB|sp|D0ZXQ3|SMVA\_SALT1 Methyl viologen resistance protein SmvA OS=Salmonella typhimurium  
BAC0142|emhA|tr|Q4KH22|Q4KH22\_PSEF5 Efflux transporter, membrane fusion protein subunit EmhA OS=Pseudomonas  
BAC0419|vceB|tr|O51919|O51919\_VIBCL VceB OS=Vibrio cholerae GN=vceB PE=4 SV=1  
BAC0413|ttgR|sp|Q9AIU0|TTGR\_PSEPT HTH-type transcriptional regulator TtgR OS=Pseudomonas putida (strain DOT-  
BAC0329|qacZ|tr|Q82YU7|Q82YU7\_ENTFA Multidrug resistance protein OS=Enterococcus faecalis (strain ATCC 70080  
BAC0321|qacC/qacD|smr|sp|P14319|QACC\_STAAU Quaternary ammonium compound-resistance protein QacC OS=Staphylococcus  
BAC0002|abeS|tr|Q2FD83|Q2FD83\_ACIBA QacEdelta1 SMR family efflux pump OS=Acinetobacter baumannii GN=qacE  
BAC0507|tolCsm|tr|R4ITT0|R4ITT0\_STEMA Outer membrane protein OS=Stenotrophomonas maltophilia GN=tolCsm PE=4 SV=1  
BAC0337|sdeB|tr|Q84GI9|Q84GI9\_SERMA Putative resistance-nodulation cell division protein SdeB OS=Serratia marcescens  
BAC0173|gadB|sp|P69910|DCEB\_ECOLI Glutamate decarboxylase beta OS=Escherichia coli (strain K12) GN=gadB PE=4 SV=1  
BAC0597|baeS|tr|D0ZNE2|D0ZNE2\_SALT1 Signal transduction histidine-protein kinase BaeS OS=Salmonella typhimurium  
BAC0499|emrAsm|tr|B2FIC9|B2FIC9\_STRMK Putative multidrug resistance protein A OS=Stenotrophomonas maltophilia  
BAC0405|ttgB|sp|O52248|TTGB\_PSEPT Toluene efflux pump membrane transporter TtgB OS=Pseudomonas putida (strain DOT-  
BAC0505|farR|tr|Q7DD70|Q7DD70\_NEIMB Transcriptional regulator, MarR family OS=Neisseria meningitidis serogroup  
BAC0502|emrRsm|tr|B2FIC7|B2FIC7\_STRMK Putative MarR-family transcriptional regulator OS=Stenotrophomonas maltophilia  
BAC0029|chrF|tr|A4UQR2|A4UQR2\_9RHIZ ChrF OS=Ochrobactrum tritici GN=chrF PE=4 SV=1  
BAC0538|chrR|tr|Q7BD45|Q7BD45\_PSEPU Chromate reductase OS=Pseudomonas putida GN=chrR PE=4 SV=1  
BAC0328|qacR|sp|P0A0N4|QACR\_STAAU HTH-type transcriptional regulator QacR OS=Staphylococcus aureus GN=qacR PE=4 SV=1  
BAC0650|merA|tr|O08449|O08449\_9PSED Mercuric reductase OS=Pseudomonas sp. K-62 GN=merA PE=4 SV=1  
BAC0141|emeA|tr|Q8GR72|Q8GR72\_ENTFL Multidrug efflux pump OS=Enterococcus faecalis GN=emeA PE=4 SV=1  
BAC0159|fabV|sp|Q9KRA3|Y1738\_VIBCH Putative reductase VC\_1738/VC\_1739 OS=Vibrio cholerae serotype O1 (strain ATCC 35061)  
BAC0657|merB|tr|O07303|O07303\_9PSED Alkylmercury lyase OS=Pseudomonas sp. K-62 GN=merB PE=3 SV=2  
BAC0506|pcm|tr|R4IUI7|R4IUI7\_STEMA Protein-L-isoaspartate O-methyltransferase OS=Stenotrophomonas maltophilia  
BAC0229|merG|tr|O07302|O07302\_9PSED Mercuric resistance protein OS=Pseudomonas sp. K-62 GN=merG PE=4 SV=2  
BAC0498|ideR|sp|P0A672|IDER\_MYCTU Iron-dependent repressor IdeR OS=Mycobacterium tuberculosis GN=ideR PE=4 SV=1  
BAC0313|pmpM|sp|Q9I3Y3|PMPM\_PSEAE Multidrug resistance protein PmpM OS=Pseudomonas aeruginosa (strain ATCC 27604)  
BAC0596|baeR|tr|D0ZNE3|D0ZNE3\_SALT1 DNA-binding transcriptional regulator BaeR OS=Salmonella typhimurium (strain ATCC 14028)  
BAC0415|ttgV|sp|Q93PU6|TTGV\_PSEPT HTH-type transcriptional regulator TtgV OS=Pseudomonas putida (strain DOT-  
BAC0044|bepE|sp|Q8G2M6|BEPE\_BRUSU Efflux pump membrane transporter BepE OS=Brucella suis biovar 1 (strain 13309)  
BAC0500|emrBsm|tr|B2FID0|B2FID0\_STRMK Putative multidrug resistance protein B OS=Stenotrophomonas maltophilia  
BAC0027|chrB|tr|A4UQR5|A4UQR5\_9RHIZ ChrB OS=Ochrobactrum tritici GN=chrB PE=4 SV=1  
BAC0248|mexY|tr|Q9ZNG8|Q9ZNG8\_PSEAI MexY OS=Pseudomonas aeruginosa GN=mexY PE=4 SV=1  
BAC0411|ttgH|sp|Q93PU4|TTGH\_PSEPT Toluene efflux pump membrane transporter TtgH OS=Pseudomonas putida (strain DOT-  
BAC0258|mtrD|tr|Q5F725|Q5F725\_NEIG1 Antibiotic resistance efflux pump component OS=Neisseria gonorrhoeae (strain ATCC 49229)  
BAC0282|norA|sp|P0A0J7|NORA\_STAAU Quinolone resistance protein NorA OS=Staphylococcus aureus GN=norA PE=4 SV=1  
BAC0358|smeD|tr|I0KXS9|I0KXS9\_STEMA Membrane fusion protein of RND family multidrug efflux pump OS=Stenotrophomonas maltophilia  
BAC0418|vceA|tr|O51918|O51918\_VIBCL VceA OS=Vibrio cholerae GN=vceA PE=4 SV=1  
BAC0043|bepD|sp|Q8G2M7|BEPD\_BRUSU Efflux pump periplasmic linker BepD OS=Brucella suis biovar 1 (strain 13309)  
BAC0221|mepA|sp|Q7A7N0|MEPA\_STAAN Multidrug export protein MepA OS=Staphylococcus aureus (strain N315) GN=mepA PE=4 SV=1  
BAC0473|adeC|tr|Q93E18|Q93E18\_ACIBA AdeC outer membrane protein OS=Acinetobacter baumannii GN=adeC PE=4 SV=1  
BAC0292|oprM|oprK|sp|Q51487|OPRM\_PSEAE Outer membrane protein OprM OS=Pseudomonas aeruginosa (strain ATCC 27604)  
BAC0025|amvA|tr|C4PAW9|C4PAW9\_ACIBA Major facilitator superfamily efflux pump OS=Acinetobacter baumannii GN=amvA PE=4 SV=1  
BAC0501|emrCsm|tr|B2FIC8|B2FIC8\_STRMK Putative outer membrane multidrug efflux protein OS=Stenotrophomonas maltophilia

BAC0567|actA|sp|Q52910|LNT\_SINMW Apolipoprotein N-acyltransferase OS=Sinorhizobium medicae (strain WSM419)  
BAC0398|triC|tr|Q663E8|Q663E8\_YERPS TriC protein OS=Yersinia pseudotuberculosis serotype I (strain IP32953) GN=t  
BAC0430|vmeB|tr|Q2AAU3|Q2AAU3\_VIBPH Inner membrane protein VmeB OS=Vibrio parahaemolyticus GN=vmeB PE=1  
BAC0688|merR2|tr|Q79B70|Q79B70\_PSEST Organomercurial resistance regulatory protein OS=Pseudomonas stutzeri GN=merR2  
BAC0648|merA|sp|P08662|MERA\_SERMA Mercuric reductase (Fragments) OS=Serratia marcescens GN=merA PE=3 SV=1  
BAC0324|qacF|sp|Q9X2N9|QACF\_ENTAE Quaternary ammonium compound-resistance protein QacF OS=Enterobacter aerogenes  
BAC0357|recG|tr|B5L350|B5L350\_9PSED ATP-dependent DNA helicase (Fragment) OS=Pseudomonas corrugata GN=recG  
BAC0047|bexA|tr|Q93HR0|Q93HR0\_BACT4 BexA OS=Bacteroides thetaiotaomicron GN=bexA PE=4 SV=1  
BAC0018|adeJ|tr|Q24LT7|Q24LT7\_ACIBA AdeJ OS=Acinetobacter baumannii GN=adeJ PE=4 SV=1  
BAC0293|ruvB|tr|B5L348|B5L348\_9PSED Malic enzyme family protein (Fragment) OS=Pseudomonas corrugata PE=3 SV=1  
BAC0335|rpoS|sp|P35540|RPOS\_SHIFL RNA polymerase sigma factor RpoS OS=Shigella flexneri GN=rpoS PE=3 SV=3  
BAC0706|sodB|sp|P53641|SODF\_PSEAE Superoxide dismutase [Fe] OS=Pseudomonas aeruginosa (strain ATCC 15692 / ATCC 27962) GN=sodB  
BAC0564|actP|yjeG|sp|P32705|ACTP\_ECOLI Cation/acetate symporter ActP OS=Escherichia coli (strain K12) GN=actP PE=1 SV=1  
BAC0322|qacE|sp|P0AGC9|QACE\_ECOLX Quaternary ammonium compound-resistance protein QacE OS=Escherichia coli (strain K12) GN=qacE  
BAC0194|ibpA|sp|P0C054|IBPA\_ECOLI Small heat shock protein IbpA OS=Escherichia coli (strain K12) GN=ibpA PE=1 SV=1  
BAC0368|sodA|sp|P00448|SODM\_ECOLI Superoxide dismutase [Mn] OS=Escherichia coli (strain K12) GN=sodA PE=1 SV=1  
BAC0019|adeK|tr|Q24LT6|Q24LT6\_ACIBA AdeK OS=Acinetobacter baumannii GN=adeK PE=4 SV=1  
BAC0532|cpxA|tr|C4WZK5|C4WZK5\_KLEPN Sensor protein of stress-related two-component regulatory system OS=Klebsiella pneumoniae  
BAC0242|mexK|tr|Q9HXW4|Q9HXW4\_PSEAE Probable Resistance-Nodulation-Cell Division (RND) efflux transporter MexK OS=Pseudomonas aeruginosa  
BAC0536|oxyRkp|tr|C4WZN6|C4WZN6\_KLEPN Activator of hydrogen peroxide-inducible genes OS=Klebsiella pneumoniae  
BAC0364|smrA|tr|C7SLZ1|C7SLZ1\_STEMA ABC-type multidrug efflux pump (Fragment) OS=Stenotrophomonas maltophilia  
BAC0533|cpXR|tr|C4WZK6|C4WZK6\_KLEPN Response regulator of stress-related two-component regulatory system OS=Klebsiella pneumoniae  
BAC0565|actR|sp|A6UEL7|ACTR\_SINMW Acid tolerance regulatory protein ActR OS=Sinorhizobium medicae (strain WSM419) GN=actR  
BAC0239|mexF|tr|Q4KBN7|Q4KBN7\_PSEF5 Multidrug efflux RND transporter, permease protein MexF OS=Pseudomonas aeruginosa  
BAC0211|mdtB|yegN|sp|P76398|MDTB\_ECOLI Multidrug resistance protein MdtB OS=Escherichia coli (strain K12) GN=mdtB  
BAC0196|iclR|sp|P16528|ICLR\_ECOLI Acetate operon repressor OS=Escherichia coli (strain K12) GN=iclR PE=1 SV=1  
BAC0006|acrB|sp|P31224|ACRB\_ECOLI Multidrug efflux pump subunit AcrB OS=Escherichia coli (strain K12) GN=acrB PE=1 SV=1  
BAC0181|glpF|sp|P0AER0|GLPF\_ECOLI Glycerol uptake facilitator protein OS=Escherichia coli (strain K12) GN=glpF PE=1 SV=1  
BAC0295|oqxB|tr|Q69HW2|Q69HW2\_ECOLX OqxB integral membrane protein OS=Escherichia coli GN=oxqB PE=4 SV=1  
BAC0370|soxR|sp|P0ACS2|SOXR\_ECOLI Redox-sensitive transcriptional activator SoxR OS=Escherichia coli (strain K12) GN=soxR  
BAC0559|emrR|sp|P0ACR9|MPRA\_ECOLI Transcriptional repressor MprA OS=Escherichia coli (strain K12) GN=mprA PE=1 SV=1  
BAC0039|baeR|sp|P69228|BAER\_ECOLI Transcriptional regulatory protein BaeR OS=Escherichia coli (strain K12) GN=baeR  
BAC0001|abeM|tr|Q5FAM9|Q5FAM9\_ACIBA Multidrug efflux pump AbeM OS=Acinetobacter baumannii GN=abeM PE=1 SV=1  
BAC0017|adeI|tr|Q2FD95|Q2FD95\_ACIBA AdeI OS=Acinetobacter baumannii GN=adeI PE=4 SV=1  
BAC0323|qacEdelta1|tr|Q7BQY4|Q7BQY4\_PSEAI Disinfectant resistance protein OS=Pseudomonas aeruginosa GN=qacEdelta1  
BAC0149|emrD|sp|P31442|EMRD\_ECOLI Multidrug resistance protein D OS=Escherichia coli (strain K12) GN=emrD PE=1 SV=1  
BAC0148|emrB|sp|P0AEJ0|EMRB\_ECOLI Multidrug resistance protein B OS=Escherichia coli (strain K12) GN=emrB PE=1 SV=1  
BAC0143|emhB|tr|C1KA85|C1KA85\_PSEFL EmhB OS=Pseudomonas fluorescens GN=emhB PE=4 SV=1  
BAC0156|fabI|sp|P0AEK4|FABI\_ECOLI Enoyl-[acyl-carrier-protein] reductase [NADH] FabI OS=Escherichia coli (strain K12) GN=fabI  
BAC0061|cepA|sp|Q8RR17|FIEF\_KLEPN Cation-efflux pump FieF OS=Klebsiella pneumoniae GN=fieF PE=3 SV=1  
BAC0212|mdtC|yegO|sp|P76399|MDTC\_ECOLI Multidrug resistance protein MdtC OS=Escherichia coli (strain K12) GN=mdtC  
BAC0530|phoB|tr|C4X6T6|C4X6T6\_KLEPN Response regulator in two-component regulatory system with PhoQ OS=Klebsiella pneumoniae  
BAC0015|adeG|tr|Q2FD81|Q2FD81\_ACIBA Cation/multidrug efflux pump OS=Acinetobacter baumannii GN=29\_167 PE=1 SV=1  
BAC0494|eefA|tr|A8CY69|A8CY69\_KLEPN EefA OS=Klebsiella pneumoniae GN=eefA PE=4 SV=1  
BAC0541|yieF|sp|P0AGE6|YIEF\_ECOLI Uncharacterized protein YieF OS=Escherichia coli (strain K12) GN=yieF PE=1 SV=1  
BAC0334|robA|sp|P0ACI0|ROB\_ECOLI Right origin-binding protein OS=Escherichia coli (strain K12) GN=rob PE=1 SV=1

BAC0008|acrD/yffA|sp|P24177|ACRD\_ECOLI Probable aminoglycoside efflux pump OS=Escherichia coli (strain K12) GN=acrD PE=1 SV=1

BAC0246|mexW|tr|Q9HW27|Q9HW27\_PSEAE Probable Resistance-Nodulation-Cell Division (RND) efflux transporter OS=Pseudomonas aeruginosa GN=mexW PE=1 SV=1

BAC0010|acrF/envD|sp|P24181|ACRF\_ECOLI Acriflavine resistance protein F OS=Escherichia coli (strain K12) GN=acrF PE=1 SV=1

BAC0215|mdtG/yceE|sp|P25744|MDTG\_ECOLI Multidrug resistance protein MdtG OS=Escherichia coli (strain K12) GN=mdtG PE=1 SV=1

BAC0172|gadA|sp|P69908|DCEA\_ECOLI Glutamate decarboxylase alpha OS=Escherichia coli (strain K12) GN=gadA PE=1 SV=1

BAC0210|mdtA/yegM|sp|P76397|MDTA\_ECOLI Multidrug resistance protein MdtA OS=Escherichia coli (strain K12) GN=mdtA PE=1 SV=1

BAC0005|acrA|sp|P0AE06|ACRA\_ECOLI Multidrug efflux pump subunit AcrA OS=Escherichia coli (strain K12) GN=acrA PE=1 SV=1

BAC0451|yodD|sp|P64519|YODD\_ECOLI Uncharacterized protein YodD OS=Escherichia coli (strain K12) GN=yodD PE=1 SV=1

BAC0393|tolC|sp|P02930|TOLC\_ECOLI Outer membrane protein TolC OS=Escherichia coli (strain K12) GN=tolC PE=1 SV=1

BAC0218|mdtK/ydhE|sp|P37340|MDTK\_ECOLI Multidrug resistance protein MdtK OS=Escherichia coli (strain K12) GN=mdtK PE=1 SV=1

BAC0294|oqxA|tr|Q69HW3|Q69HW3\_ECOLX OqxA membrane-fusion protein OS=Escherichia coli GN=oqxA PE=4 SV=1

BAC0166|fetB/ybbM|sp|P77307|YBBM\_ECOLI UPF0014 inner membrane protein YbbM OS=Escherichia coli (strain K12) GN=fetB PE=1 SV=1

BAC0220|mdtN/yjcR|sp|P32716|MDTN\_ECOLI Multidrug resistance protein MdtN OS=Escherichia coli (strain K12) GN=mdtN PE=1 SV=1

BAC0011|acrR/ybaH|sp|P0ACS9|ACRR\_ECOLI HTH-type transcriptional regulator AcrR OS=Escherichia coli (strain K12) GN=acrR PE=1 SV=1

BAC0222|mepB|sp|P0C070|MEPB\_PSEPU Multidrug/solvent efflux pump membrane transporter MepB OS=Pseudomonas aeruginosa GN=mepB PE=1 SV=1

BAC0529|kpnO|tr|C4XBC3|C4XBC3\_KLEPN Outer membrane porin protein C OS=Klebsiella pneumoniae subsp. pneumoniae GN=kpnO PE=1 SV=1

BAC0491|kdeA|tr|A6T6T9|A6T6T9\_KLEP7 Multidrug/chloramphenicol efflux transport protein (MFS family) OS=Klebsiella pneumoniae GN=kdeA PE=1 SV=1

BAC0195|ibpB|sp|P0C058|IBPB\_ECOLI Small heat shock protein IbpB OS=Escherichia coli (strain K12) GN=ibpB PE=1 SV=1

BAC0296|ostA/lptD|sp|P31554|LPTD\_ECOLI LPS-assembly protein LptD OS=Escherichia coli (strain K12) GN=lptD PE=1 SV=1

BAC0040|baeS|sp|P30847|BAES\_ECOLI Signal transduction histidine-protein kinase BaeS OS=Escherichia coli (strain K12) GN=baeS PE=1 SV=1

BAC0185|hdeA/yhiB|sp|P0AES9|HDEA\_ECOLI Acid stress chaperone HdeA OS=Escherichia coli (strain K12) GN=hdeA PE=1 SV=1

BAC0707|sodB|sp|P0AGD3|SODF\_ECOLI Superoxide dismutase [Fe] OS=Escherichia coli (strain K12) GN=sodB PE=1 SV=1

BAC0147|emrA|sp|P27303|EMRA\_ECOLI Multidrug resistance protein A OS=Escherichia coli (strain K12) GN=emrA PE=1 SV=1

BAC0208|mdfA/cmr|sp|P0AEY8|MDFA\_ECOLI Multidrug transporter MdfA OS=Escherichia coli (strain K12) GN=mdfA PE=1 SV=1

BAC0495|eefX|tr|A8CY68|A8CY68\_KLEPN EefX OS=Klebsiella pneumoniae GN=eefX PE=4 SV=1

BAC0371|soxS|sp|P0A9E2|SOXS\_ECOLI Regulatory protein SoxS OS=Escherichia coli (strain K12) GN=soxS PE=1 SV=1

BAC0531|phoR|tr|C4X6T5|C4X6T5\_KLEPN Sensor kinase in two-component regulatory system with PhoP OS=Klebsiella pneumoniae GN=phoR PE=1 SV=1

BAC0560|marA|sp|P0ACH5|MARA\_ECOLI Multiple antibiotic resistance protein MarA OS=Escherichia coli (strain K12) GN=marA PE=1 SV=1

BAC0213|mdtE/yhiU|sp|P37636|MDTE\_ECOLI Multidrug resistance protein MdtE OS=Escherichia coli (strain K12) GN=mdtE PE=1 SV=1

BAC0493|kmrA|tr|C4X8X9|C4X8X9\_KLEPN Energy-dependent efflux protein for methyl viologen resistance OS=Klebsiella pneumoniae GN=kmrA PE=1 SV=1

BAC0434|ychH|sp|P0AB49|YCHH\_ECOLI Uncharacterized protein YchH OS=Escherichia coli (strain K12) GN=ychH PE=1 SV=1

BAC0041|bcr|sp|P28246|BCR\_ECOLI Bicyclomycin resistance protein OS=Escherichia coli (strain K12) GN=bcr PE=1 SV=1

BAC0595|arsH|tr|P74312|P74312\_SYNY3 Slr0945 protein OS=Synechocystis sp. (strain PCC 6803 / Kazusa) GN=slr0945 PE=1 SV=1

BAC0561|marR|sp|P27245|MARR\_ECOLI Multiple antibiotic resistance protein MarR OS=Escherichia coli (strain K12) GN=marR PE=1 SV=1

BAC0384|tehA|sp|P25396|TEHA\_ECOLI Tellurite resistance protein TehA OS=Escherichia coli (strain K12) GN=tehA PE=1 SV=1

BAC0498|ideR|sp|P0A672|IDER\_MYCTU Iron-dependent repressor IdeR OS=Mycobacterium tuberculosis GN=ideR PE=1 SV=1

BAC0445|ygiW|sp|P0ADU5|YGIW\_ECOLI Protein YgiW OS=Escherichia coli (strain K12) GN=ygiW PE=1 SV=1

BAC0417|vcaM|tr|Q9KKV4|Q9KKV4\_VIBCH ABC transporter, ATP-binding protein OS=Vibrio cholerae serotype O1 (strain 569B) GN=vcaM PE=1 SV=1

BAC0177|gadX|sp|P37639|GADX\_ECOLI HTH-type transcriptional regulator GadX OS=Escherichia coli (strain K12) GN=gadX PE=1 SV=1

BAC0351|sitC|tr|Q9XCS0|Q9XCS0\_SALTM SitC OS=Salmonella typhimurium GN=sitC PE=3 SV=1

BAC0009|acrE/envC|sp|P24180|ACRE\_ECOLI Acriflavine resistance protein E OS=Escherichia coli (strain K12) GN=acrE PE=1 SV=1

BAC0214|mdtF/yhiV|sp|P37637|MDTF\_ECOLI Multidrug resistance protein MdtF OS=Escherichia coli (strain K12) GN=mdtF PE=1 SV=1

BAC0219|mdtM/yjiO|sp|P39386|MDTM\_ECOLI Multidrug resistance protein MdtM OS=Escherichia coli (strain K12) GN=mdtM PE=1 SV=1

BAC0146|emmDR|tr|D5CJ69|D5CJ69\_ENTCC MATE efflux family protein OS=Enterobacter cloacae subsp. cloacae (strain ATCC 35061) GN=emmDR PE=1 SV=1

BAC0235|mexB|sp|P52002|MEXB\_PSEAE Multidrug resistance protein MexB OS=Pseudomonas aeruginosa (strain ATCC 27956) GN=mexB PE=1 SV=1

BAC0186|hdeB/yhiC|sp|P0AET2|HDEB\_ECOLI Acid stress chaperone HdeB OS=Escherichia coli (strain K12) GN=hdeB PE=1 SV=1

BAC0216|mdtI|ydgE|sp|P69210|MDTI\_ECOLI Spermidine export protein MdtI OS=Escherichia coli (strain K12) GN=mdtI PE=3 SV=1  
BAC0175|gadE|yhiE|sp|P63204|GADE\_ECOLI Transcriptional regulator GadE OS=Escherichia coli (strain K12) GN=gadE PE=3 SV=1  
BAC0165|fetA|ybbL|sp|P77279|YBBL\_ECOLI Uncharacterized ABC transporter ATP-binding protein YbbL OS=Escherichia coli (strain K12) GN=fetA PE=3 SV=1  
BAC0385|tehB|sp|P25397|TEHB\_ECOLI Tellurite methyltransferase OS=Escherichia coli (strain K12) GN=tehB PE=1 SV=1  
BAC0153|emrY|sp|P52600|EMRY\_ECOLI Multidrug resistance protein Y OS=Escherichia coli (strain K12) GN=emrY PE=3 SV=1  
BAC0378|sugE|sp|P69937|SUGE\_ECOLI Quaternary ammonium compound-resistance protein SugE OS=Escherichia coli (strain K12) GN=sugE PE=3 SV=1  
BAC0353|smdA|tr|A7VN01|A7VN01\_SERMA Multidrug efflux pump SmdA OS=Serratia marcescens GN=smdA PE=3 SV=1  
BAC0144|emhC|tr|Q4KH24|Q4KH24\_PSEF5 Efflux transporter, outer membrane factor lipoprotein EmhC OS=Pseudomonas aeruginosa GN=emhC PE=3 SV=1  
BAC0477|kpnF|tr|C4X7Z4|C4X7Z4\_KLEPN Spermidine export protein MdtI OS=Klebsiella pneumoniae subsp. pneumoniae GN=kpnF PE=3 SV=1  
BAC0155|evgS|sp|P58402|EVGS\_ECO57 Sensor protein EvgS OS=Escherichia coli O157:H7 GN=evgS PE=3 SV=1  
BAC0446|yhcN|sp|P64614|YHCN\_ECOLI Uncharacterized protein YhcN OS=Escherichia coli (strain K12) GN=yhcN PE=3 SV=1  
BAC0450|ymgB|ariR|sp|P75993|ARIR\_ECOLI Probable two-component-system connector protein AriR OS=Escherichia coli (strain K12) GN=ymgB PE=3 SV=1  
BAC0244|mexT|tr|O87785|O87785\_PSEAI MexT protein OS=Pseudomonas aeruginosa GN=mexT PE=4 SV=1  
BAC0176|gadW|yhiW|sp|P63201|GADW\_ECOLI HTH-type transcriptional regulator GadW OS=Escherichia coli (strain K12) GN=gadW PE=3 SV=1  
BAC0252|mntP|yebN|sp|P76264|MNTP\_ECOLI Probable manganese efflux pump MntP OS=Escherichia coli (strain K12) GN=mntP PE=3 SV=1  
BAC0142|emhA|tr|Q4KH22|Q4KH22\_PSEF5 Efflux transporter, membrane fusion protein subunit EmhA OS=Pseudomonas aeruginosa GN=emhA PE=3 SV=1  
BAC0154|evgA|sp|P0ACZ4|EVGA\_ECOLI Positive transcription regulator EvgA OS=Escherichia coli (strain K12) GN=evgA PE=3 SV=1  
BAC0359|smeE|tr|I0KXS8|I0KXS8\_STEMA RND efflux system, inner membrane transporter OS=Stenotrophomonas maltophilia GN=smeE PE=3 SV=1  
BAC0151|emrK|sp|P52599|EMRK\_ECOLI Multidrug resistance protein K OS=Escherichia coli (strain K12) GN=emrK PE=3 SV=1  
BAC0145|emhR|tr|Q4KH21|Q4KH21\_PSEF5 Transcriptional regulator EmhR OS=Pseudomonas fluorescens (strain Pf-5) GN=emhR PE=3 SV=1  
BAC0174|gadC|xasA|sp|P63235|GADC\_ECOLI Probable glutamate/gamma-aminobutyrate antiporter OS=Escherichia coli (strain K12) GN=gadC PE=3 SV=1  
BAC0496|adeN|tr|B7H1T7|B7H1T7\_ACIB3 Bacterial regulatory protein, tetR family protein OS=Acinetobacter baumannii GN=adeN PE=3 SV=1  
BAC0012|actP|sp|Q9X5X3|ATCU\_SINMW Copper-transporting P-type ATPase OS=Sinorhizobium medicae (strain WSM1) GN=actP PE=3 SV=1  
BAC0150|emrE|mvrC|sp|P23895|EMRE\_ECOLI Multidrug transporter EmrE OS=Escherichia coli (strain K12) GN=emrE PE=3 SV=1  
BAC0472|adeB|tr|Q93E19|Q93E19\_ACIBA AdeB RND protein OS=Acinetobacter baumannii GN=adeB PE=4 SV=1  
BAC0029|chrF|tr|A4UQR2|A4UQR2\_9RHIZ ChrF OS=Ochrobactrum tritici GN=chrF PE=4 SV=1  
BAC0438|ydeP|sp|P77561|YDEP\_ECOLI Protein YdeP OS=Escherichia coli (strain K12) GN=ydeP PE=2 SV=1  
BAC0352|sitD|tr|Q9XCR9|Q9XCR9\_SALTM SitD OS=Salmonella typhimurium GN=sitD PE=3 SV=1  
BAC0135|dpsA|tr|Q8KR86|Q8KR86\_BURPE DpsA OS=Burkholderia pseudomallei GN=dpsA PE=3 SV=1  
BAC0350|sitB|tr|Q9XCS1|Q9XCS1\_SALTM SitB OS=Salmonella typhimurium GN=sitB PE=3 SV=1  
BAC0436|ydeI|sp|P31130|YDEI\_ECOLI Uncharacterized protein YdeI OS=Escherichia coli (strain K12) GN=ydeI PE=4 SV=1  
BAC0476|kpnE|tr|C4X7Z3|C4X7Z3\_KLEPN Multidrug transport protein OS=Klebsiella pneumoniae subsp. pneumoniae GN=kpnE PE=3 SV=1  
BAC0358|oscA|tr|B6CM35|B6CM35\_9PSED Putative uncharacterized protein oscA OS=Pseudomonas corrugata GN=oscA PE=3 SV=1  
BAC0217|mdtJ|ebrB|ydgF|sp|Q3Z1V3|MDTJ\_SHISS Spermidine export protein MdtJ OS=Shigella sonnei (strain Ss046) GN=mdtJ PE=3 SV=1  
BAC0013|adeE|tr|Q8GKU1|Q8GKU1\_ACIG3 AdeE OS=Acinetobacter sp. 4365 GN=adeE PE=4 SV=2  
BAC0492|kexD|tr|A6TA71|A6TA71\_KLEP7 Acridine efflux pump OS=Klebsiella pneumoniae subsp. pneumoniae (strain K12) GN=kexD PE=3 SV=1  
BAC0435|yddG|emrE|sp|D0ZXP9|YDDG\_SALT1 Methyl viologen resistance protein YddG OS=Salmonella typhimurium GN=yddG PE=3 SV=1  
BAC0659|merB|sp|P08664|MERB\_SERMA Alkylmercury lyase OS=Serratia marcescens GN=merB PE=3 SV=1  
BAC0437|ydeO|sp|P76135|YDEO\_ECOLI HTH-type transcriptional regulator YdeO OS=Escherichia coli (strain K12) GN=ydeO PE=3 SV=1  
BAC0157|fabK|tr|Q9FBC5|Q9FBC5\_STREE Trans-2-enoyl-ACP reductase II OS=Streptococcus pneumoniae GN=fabK PE=3 SV=1  
BAC0650|merA|tr|O08449|O08449\_9PSED Mercuric reductase OS=Pseudomonas sp. K-62 GN=merA PE=4 SV=1  
BAC0349|sitA|tr|Q9XCS2|Q9XCS2\_SALTI Iron transport protein, periplasmic-binding protein OS=Salmonella typhi GN=sitA PE=3 SV=1  
BAC0511|vmeD|tr|Q87TN1|Q87TN1\_VIBPA Putative multidrug resistance protein OS=Vibrio parahaemolyticus serotype O1 GN=vmeD PE=3 SV=1  
BAC0424|vexB|tr|Q9KVI2|Q9KVI2\_VIBCH Multidrug resistance protein, putative OS=Vibrio cholerae serotype O1 (strain N169) GN=vexB PE=3 SV=1  
BAC0337|sdeB|tr|Q84GI9|Q84GI9\_SERMA Putative resistance-nodulation cell division protein SdeB OS=Serratia marcescens GN=sdeB PE=3 SV=1  
BAC0339|sdeY|tr|Q7WSD5|Q7WSD5\_SERMA Multidrug efflux pump SdeY OS=Serratia marcescens GN=sdeY PE=4 SV=1

BAC0106|cuiD|sp|Q8ZRS2|CUEO\_SALTY Blue copper oxidase CueO OS=Salmonella typhimurium (strain LT2 / SGSC1  
BAC0447|yjaA|sp|P09162|YJAA\_ECOLI Uncharacterized protein YjaA OS=Escherichia coli (strain K12) GN=yjaA PE=4  
BAC0038|asr|sp|P36560|ASR\_ECOLI Acid shock protein OS=Escherichia coli (strain K12) GN=asr PE=1 SV=3  
BAC0179|gesB|tr|Q8ZRG9|Q8ZRG9\_SALTY Putative cation efflux system protein OS=Salmonella typhimurium (strain L  
BAC0500|emrBsm|tr|B2FID0|B2FID0\_STRMK Putative multidrug resistance protein B OS=Stenotrophomonas maltophilia  
BAC0238|mexE|tr|Q1IB41|Q1IB41\_PSEE4 Multidrug efflux RND membrane fusion protein MexE OS=Pseudomonas ento  
BAC0223|mepC|sp|P0C071|MEPC\_PSEPU Multidrug/solvent efflux pump outer membrane protein MepC OS=Pseudomon  
BAC0229|merG|tr|O07302|O07302\_9PSED Mercuric resistance protein OS=Pseudomonas sp. K-62 GN=merG PE=4 SV=2  
BAC0367|smvA|emrB|sp|D0ZXQ3|SMVA\_SALT1 Methyl viologen resistance protein SmvA OS=Salmonella typhimurium  
BAC0499|emrAsm|tr|B2FIC9|B2FIC9\_STRMK Putative multidrug resistance protein A OS=Stenotrophomonas maltophilia  
BAC0134|dpr|dps|sp|P0CB53|DPS\_STRSU DNA protection during starvation protein OS=Streptococcus suis GN=dps PE=  
BAC0237|mexD|tr|Q51396|Q51396\_PSEAI RND family exporter MexD OS=Pseudomonas aeruginosa GN=mexD PE=4 S  
BAC0596|baeR|tr|D0ZNE3|D0ZNE3\_SALT1 DNA-binding transcriptional regulator BaeR OS=Salmonella typhimurium (s  
BAC0506|pcm|tr|R4IUI7|R4IUI7\_STEMA Protein-L-isoaspartate O-methyltransferase OS=Stenotrophomonas maltophilia  
BAC0526|vmeV|tr|Q87HZ7|Q87HZ7\_VIBPA Transporter, AcrB/D/F family OS=Vibrio parahaemolyticus serotype O3:K6  
BAC0419|vceB|tr|O51919|O51919\_VIBCL VceB OS=Vibrio cholerae GN=vceB PE=4 SV=1  
BAC0505|farR|tr|Q7DD70|Q7DD70\_NEIMB Transcriptional regulator, MarR family OS=Neisseria meningitidis serogroup  
BAC0404|ttgA|sp|Q9WWZ9|TTGA\_PSEPT Toluene efflux pump periplasmic linker protein TtgA OS=Pseudomonas putida  
BAC0381|tbtM|tr|Q71UZ5|Q71UZ5\_PSEST Outer membrane protein TbtM OS=Pseudomonas stutzeri GN=tbtM PE=4 SV  
BAC0354|smdB|tr|A7VN02|A7VN02\_SERMA Multidrug efflux pump SmdB OS=Serratia marcescens GN=smdB PE=3 SV  
BAC0566|actS|tr|Q52912|Q52912\_9RHIZ Histidine protein kinase OS=Sinorhizobium medicae GN=actS PE=4 SV=1  
BAC0538|chrR|tr|Q7BD45|Q7BD45\_PSEPU Chromate reductase OS=Pseudomonas putida GN=chrR PE=4 SV=1  
BAC0705|sodA|sp|P53652|SODM\_PSEAE Superoxide dismutase [Mn] OS=Pseudomonas aeruginosa (strain ATCC 15692  
BAC0027|chrB|tr|A4UQR5|A4UQR5\_9RHIZ ChrB OS=Ochrobactrum tritici GN=chrB PE=4 SV=1  
BAC0657|merB|tr|O07303|O07303\_9PSED Alkylmercury lyase OS=Pseudomonas sp. K-62 GN=merB PE=3 SV=2  
BAC0377|ssmE|tr|A7VN75|A7VN75\_SERMA Multidrug efflux pump SsmE OS=Serratia marcescens GN=ssmE PE=3 SV  
BAC0508|adeL|tr|A3M732|A3M732\_ACIBT Transcriptional regulator LysR family OS=Acinetobacter baumannii (strain A  
BAC0173|gadB|sp|P69910|DCEB\_ECOLI Glutamate decarboxylase beta OS=Escherichia coli (strain K12) GN=gadB PE=  
BAC0597|baeS|tr|D0ZNE2|D0ZNE2\_SALT1 Signal transduction histidine-protein kinase BaeS OS=Salmonella typhimurium  
BAC0290|opmD|nmpC|sp|P37592|OMPD\_SALTY Outer membrane porin protein OpmD OS=Salmonella typhimurium (st  
BAC0184|hasF|tr|Q6GW09|Q6GW09\_SERMA TolC-like protein OS=Serratia marcescens PE=4 SV=1  
BAC0681|merR2|tr|Q9WWL1|Q9WWL1\_BACSR Mercury resistance operon negative regulator MerR2 OS=Bacillus sp. (s  
BAC0509|vexH|tr|Q9KTI8|Q9KTI8\_VIBCH Multidrug resistance protein, putative OS=Vibrio cholerae serotype O1 (strain  
BAC0141|emeA|tr|Q8GR72|Q8GR72\_ENTFL Multidrug efflux pump OS=Enterococcus faecalis GN=emeA PE=4 SV=1  
BAC0358|smeD|tr|I0KSX9|I0KSX9\_STEMA Membrane fusion protein of RND family multidrug efflux pump OS=Stenotr  
BAC0044|bepE|sp|Q8G2M6|BEPE\_BRUSU Efflux pump membrane transporter BepE OS=Brucella suis biovar 1 (strain 13  
BAC0207|mdeA|sp|P13254|MEGL\_PSEPU Methionine gamma-lyase OS=Pseudomonas putida GN=mdeA PE=1 SV=2  
BAC0478|adeT1|tr|C7F8K6|C7F8K6\_ACIBA AdeT1 OS=Acinetobacter baumannii PE=4 SV=1  
BAC0379|tbtA|tr|Q71UZ7|Q71UZ7\_PSEST Membrane fusion protein TbtA OS=Pseudomonas stutzeri GN=tbtA PE=4 SV  
BAC0236|mexC|tr|Q51395|Q51395\_PSEAI Membrane fusion protein MexC OS=Pseudomonas aeruginosa GN=mexC PE=  
BAC0471|adeA|tr|Q93E20|Q93E20\_ACIBA AdeA membrane fusion protein OS=Acinetobacter baumannii GN=adeA PE=  
BAC0159|fabV|sp|Q9KRA3|Y1738\_VIBCH Putative reductase VC\_1738/VC\_1739 OS=Vibrio cholerae serotype O1 (strai  
BAC0028|chrC|tr|A4UQR3|A4UQR3\_9RHIZ Superoxide dismutase OS=Ochrobactrum tritici GN=chrC PE=3 SV=1  
BAC0240|mexI|tr|Q9HWH4|Q9HWH4\_PSEAE Probable Resistance-Nodulation-Cell Division (RND) efflux transporter O  
BAC0513|vmeF|tr|Q87R57|Q87R57\_VIBPA Putative multidrug resistance protein OS=Vibrio parahaemolyticus serotype C  
BAC0408|ttgE|sp|Q9KVV4|TTGE\_PSEPT Toluene efflux pump membrane transporter TtgE OS=Pseudomonas putida (str



BAC0258|mtrD|tr|Q5F725|Q5F725\_NEIG1 Antibiotic resistance efflux pump component OS=Neisseria gonorrhoeae (strain ATCC 49229) GN=mtrD PE=4 SV=1

BAC0507|tolCsm|tr|R4ITT0|R4ITT0\_STEMA Outer membrane protein OS=Stenotrophomonas maltophilia GN=tolCsm PE=4 SV=1

BAC0313|pmpM|sp|Q9I3Y3|PMPM\_PSEAE Multidrug resistance protein PmpM OS=Pseudomonas aeruginosa (strain ATCC 27962) GN=pmpM PE=4 SV=1

BAC0474|adeD|tr|Q67GM1|Q67GM1\_ACIG3 AdeD OS=Acinetobacter sp. 4365 GN=adeD PE=4 SV=1

BAC0372|srpA|sp|O31099|SRPA\_PSEPU Solvent efflux pump periplasmic linker SrpA OS=Pseudomonas putida GN=srpA PE=4 SV=1

BAC0338|sdeX|tr|Q7WSD6|Q7WSD6\_SERMA Multidrug efflux pump SdeX OS=Serratia marcescens GN=sdeX PE=4 SV=1

BAC0418|vceA|tr|O51918|O51918\_VIBCL VceA OS=Vibrio cholerae GN=vceA PE=4 SV=1

BAC0314|pmrA|sp|P0A4K4|PMRA\_STRPN Multi-drug resistance efflux pump PmrA OS=Streptococcus pneumoniae serotype 4 GN=pmrA PE=4 SV=1

BAC0221|mepA|sp|Q7A7N0|MEPA\_STAAN Multidrug export protein MepA OS=Staphylococcus aureus (strain N315) GN=mepA PE=4 SV=1

BAC0473|adeC|tr|Q93E18|Q93E18\_ACIBA AdeC outer membrane protein OS=Acinetobacter baumannii GN=adeC PE=4 SV=1

BAC0291|oprJ|sp|Q51397|OPRJ\_PSEAE Outer membrane protein OprJ OS=Pseudomonas aeruginosa (strain ATCC 15692) GN=oprJ PE=4 SV=1

BAC0501|emrCsm|tr|B2FIC8|B2FIC8\_STRMK Putative outer membrane multidrug efflux protein OS=Stenotrophomonas maltophilia GN=emrCsm PE=4 SV=1

BAC0521|vmeK|tr|Q87LY6|Q87LY6\_VIBPA Putative multidrug resistance protein OS=Vibrio parahaemolyticus serotype O157 GN=vmeK PE=4 SV=1

BAC0430|vmeB|tr|Q2AAU3|Q2AAU3\_VIBPH Inner membrane protein VmeB OS=Vibrio parahaemolyticus GN=vmeB PE=4 SV=1

BAC0046|bepG|sp|Q8FWV9|BEPG\_BRUSU Efflux pump membrane transporter BepG OS=Brucella suis biovar 1 (strain 1907) GN=bepG PE=4 SV=1

BAC0380|tbtB|tr|Q71UZ6|Q71UZ6\_PSEST Resistance nodulation cell division family member TbtB OS=Pseudomonas stutzeri GN=tbtB PE=4 SV=1

BAC0248|mexY|tr|Q9ZNG8|Q9ZNG8\_PSEAI MexY OS=Pseudomonas aeruginosa GN=mexY PE=4 SV=1

BAC0405|ttgB|sp|O52248|TTGB\_PSEPT Toluene efflux pump membrane transporter TtgB OS=Pseudomonas putida (strain ATCC 49619) GN=ttgB PE=4 SV=1

BAC0688|merR2|tr|Q79B70|Q79B70\_PSEST Organomercurial resistance regulatory protein OS=Pseudomonas stutzeri GN=merR2 PE=4 SV=1

BAC0648|merA|sp|P08662|MERA\_SERMA Mercuric reductase (Fragments) OS=Serratia marcescens GN=merA PE=3 SV=1

BAC0018|adeJ|tr|Q24LT7|Q24LT7\_ACIBA AdeJ OS=Acinetobacter baumannii GN=adeJ PE=4 SV=1

BAC0324|qacF|sp|Q9X2N9|QACF\_ENTAE Quaternary ammonium compound-resistance protein QacF OS=Enterobacter aerogenes GN=qacF PE=4 SV=1

BAC0019|adeK|tr|Q24LT6|Q24LT6\_ACIBA AdeK OS=Acinetobacter baumannii GN=adeK PE=4 SV=1

BAC0357|recG|tr|B5L350|B5L350\_9PSED ATP-dependent DNA helicase (Fragment) OS=Pseudomonas corrugata GN=recG PE=4 SV=1

BAC0293|ruvB|tr|B5L348|B5L348\_9PSED Malic enzyme family protein (Fragment) OS=Pseudomonas corrugata GN=ruvB PE=3 SV=1

BAC0017|adeI|tr|Q2FD95|Q2FD95\_ACIBA AdeI OS=Acinetobacter baumannii GN=adeI PE=4 SV=1

BAC0706|sodB|sp|P53641|SODF\_PSEAE Superoxide dismutase [Fe] OS=Pseudomonas aeruginosa (strain ATCC 15692) GN=sodB PE=4 SV=1

BAC0335|rpoS|sp|P35540|RPOS\_SHIFL RNA polymerase sigma factor RpoS OS=Shigella flexneri GN=rpoS PE=3 SV=3

BAC0001|abeM|tr|Q5FAM9|Q5FAM9\_ACIBA Multidrug efflux pump AbeM OS=Acinetobacter baumannii GN=abeM PE=4 SV=1

BAC0364|smrA|tr|C7SLZ1|C7SLZ1\_STEMA ABC-type multidrug efflux pump (Fragment) OS=Stenotrophomonas maltophilia GN=smrA PE=4 SV=1

BAC0322|qacE|sp|P0AGC9|QACE\_ECOLX Quaternary ammonium compound-resistance protein QacE OS=Escherichia coli (strain K12) GN=qacE PE=4 SV=1

BAC0242|mexK|tr|Q9HXW4|Q9HXW4\_PSEAE Probable Resistance-Nodulation-Cell Division (RND) efflux transporter MexK OS=Pseudomonas aeruginosa GN=mexK PE=4 SV=1

BAC0564|actP|yjeG|sp|P32705|ACTP\_ECOLI Cation/acetate symporter ActP OS=Escherichia coli (strain K12) GN=actP PE=4 SV=1

BAC0047|bexA|tr|Q93HR0|Q93HR0\_BACT4 BexA OS=Bacteroides thetaiotaomicron GN=bexA PE=4 SV=1

BAC0533|cpXR|tr|C4WZK6|C4WZK6\_KLEPN Response regulator of stress-related two-component regulatory system OS=Klebsiella pneumoniae GN=cpXR PE=4 SV=1

BAC0239|mexF|tr|Q4KBN7|Q4KBN7\_PSEF5 Multidrug efflux RND transporter, permease protein MexF OS=Pseudomonas aeruginosa GN=mexF PE=4 SV=1

BAC0532|cpxA|tr|C4WZK5|C4WZK5\_KLEPN Sensor protein of stress-related two-component regulatory system OS=Klebsiella pneumoniae GN=cpxA PE=4 SV=1

BAC0536|oxyRkp|tr|C4WZN6|C4WZN6\_KLEPN Activator of hydrogen peroxide-inducible genes OS=Klebsiella pneumoniae GN=oxyRkp PE=4 SV=1

BAC0194|ibpA|sp|P0C054|IBPA\_ECOLI Small heat shock protein IbpA OS=Escherichia coli (strain K12) GN=ibpA PE=1 SV=1

BAC0565|actR|sp|A6UEL7|ACTR\_SINMW Acid tolerance regulatory protein ActR OS=Sinorhizobium medicae (strain WSM 162) GN=actR PE=4 SV=1

BAC0015|adeG|tr|Q2FD81|Q2FD81\_ACIBA Cation/multidrug efflux pump OS=Acinetobacter baumannii GN=29\_167 PE=4 SV=1

BAC0143|emhB|tr|C1KA85|C1KA85\_PSEFL EmhB OS=Pseudomonas fluorescens GN=emhB PE=4 SV=1

BAC0006|acrB|sp|P31224|ACRB\_ECOLI Multidrug efflux pump subunit AcrB OS=Escherichia coli (strain K12) GN=acrB PE=4 SV=1

BAC0211|mdtB|yegN|sp|P76398|MDTB\_ECOLI Multidrug resistance protein MdtB OS=Escherichia coli (strain K12) GN=mdtB PE=4 SV=1

BAC0156|fabI|sp|P0AEK4|FABI\_ECOLI Enoyl-[acyl-carrier-protein] reductase [NADH] FabI OS=Escherichia coli (strain K12) GN=fabI PE=4 SV=1

BAC0148|emrB|sp|P0AEJ0|EMRB\_ECOLI Multidrug resistance protein B OS=Escherichia coli (strain K12) GN=emrB PE=4 SV=1

BAC0181|glpF|sp|P0AER0|GLPF\_ECOLI Glycerol uptake facilitator protein OS=Escherichia coli (strain K12) GN=glpF PE=1 SV=1  
BAC0295|oqxB|tr|Q69HW2|Q69HW2\_ECOLX OqxB integral membrane protein OS=Escherichia coli GN=oqxB PE=4 SV=1  
BAC0246|mexW|tr|Q9HW27|Q9HW27\_PSEAE Probable Resistance-Nodulation-Cell Division (RND) efflux transporter OS=Pseudomonas aeruginosa GN=mexW PE=4 SV=1  
BAC0323|qacEdelta1|tr|Q7BQY4|Q7BQY4\_PSEAI Disinfectant resistance protein OS=Pseudomonas aeruginosa GN=qacEdelta1 PE=4 SV=1  
BAC0370|soxR|sp|P0ACS2|SOXR\_ECOLI Redox-sensitive transcriptional activator SoxR OS=Escherichia coli (strain K12) GN=soxR PE=1 SV=1  
BAC0196|iclR|sp|P16528|ICLR\_ECOLI Acetate operon repressor OS=Escherichia coli (strain K12) GN=iclR PE=1 SV=1  
BAC0559|emrR|sp|P0ACR9|MPRA\_ECOLI Transcriptional repressor MprA OS=Escherichia coli (strain K12) GN=emrR PE=1 SV=1  
BAC0472|adeB|tr|Q93E19|Q93E19\_ACIBA AdeB RND protein OS=Acinetobacter baumannii GN=adeB PE=4 SV=1  
BAC0496|adeN|tr|B7H1T7|B7H1T7\_ACIB3 Bacterial regulatory protein, tetR family protein OS=Acinetobacter baumannii GN=adeN PE=4 SV=1  
BAC0061|cepA|sp|Q8RR17|FIEF\_KLEPN Cation-efflux pump FieF OS=Klebsiella pneumoniae GN=fieF PE=3 SV=1  
BAC0368|sodA|sp|P00448|SODM\_ECOLI Superoxide dismutase [Mn] OS=Escherichia coli (strain K12) GN=sodA PE=1 SV=1  
BAC0530|phoB|tr|C4X6T6|C4X6T6\_KLEPN Response regulator in two-component regulatory system with PhoQ OS=Klebsiella pneumoniae GN=phoB PE=4 SV=1  
BAC0039|baeR|sp|P69228|BAER\_ECOLI Transcriptional regulatory protein BaeR OS=Escherichia coli (strain K12) GN=baeR PE=1 SV=1  
BAC0212|mdtC|yegO|sp|P76399|MDTC\_ECOLI Multidrug resistance protein MdtC OS=Escherichia coli (strain K12) GN=mdtC PE=1 SV=1  
BAC0010|acrF|envD|sp|P24181|ACRF\_ECOLI Acriflavine resistance protein F OS=Escherichia coli (strain K12) GN=acrF PE=1 SV=1  
BAC0008|acrD|yffA|sp|P24177|ACRD\_ECOLI Probable aminoglycoside efflux pump OS=Escherichia coli (strain K12) GN=acrD PE=1 SV=1  
BAC0707|sodB|sp|P0AGD3|SODF\_ECOLI Superoxide dismutase [Fe] OS=Escherichia coli (strain K12) GN=sodB PE=1 SV=1  
BAC0417|vcaM|tr|Q9KKV4|Q9KKV4\_VIBCH ABC transporter, ATP-binding protein OS=Vibrio cholerae serotype O1 (strain 569B) GN=vcaM PE=4 SV=1  
BAC0172|gadA|sp|P69908|DCEA\_ECOLI Glutamate decarboxylase alpha OS=Escherichia coli (strain K12) GN=gadA PE=1 SV=1  
BAC0144|emhC|tr|Q4KH24|Q4KH24\_PSEF5 Efflux transporter, outer membrane factor lipoprotein EmhC OS=Pseudomonas aeruginosa GN=emhC PE=4 SV=1  
BAC0498|ideR|sp|P0A672|IDER\_MYCTU Iron-dependent repressor IdeR OS=Mycobacterium tuberculosis GN=ideR PE=1 SV=1  
BAC0541|yieF|sp|P0AGE6|YIEF\_ECOLI Uncharacterized protein YieF OS=Escherichia coli (strain K12) GN=yieF PE=1 SV=1  
BAC0294|oqxA|tr|Q69HW3|Q69HW3\_ECOLX OqxA membrane-fusion protein OS=Escherichia coli GN=oqxA PE=4 SV=1  
BAC0494|eefA|tr|A8CY69|A8CY69\_KLEPN EefA OS=Klebsiella pneumoniae GN=eefA PE=4 SV=1  
BAC0222|mepB|sp|P0C070|MEPB\_PSEPU Multidrug/solvent efflux pump membrane transporter MepB OS=Pseudomonas aeruginosa GN=mepB PE=4 SV=1  
BAC0371|soxS|sp|P0A9E2|SOXS\_ECOLI Regulatory protein SoxS OS=Escherichia coli (strain K12) GN=soxS PE=1 SV=1  
BAC0041|bcr|sp|P28246|BCR\_ECOLI Bicyclomycin resistance protein OS=Escherichia coli (strain K12) GN=bcr PE=1 SV=1  
BAC0235|mexB|sp|P52002|MEXB\_PSEAE Multidrug resistance protein MexB OS=Pseudomonas aeruginosa (strain ATCC 27962) GN=mexB PE=4 SV=1  
BAC0296|ostA|lptD|sp|P31554|LPTD\_ECOLI LPS-assembly protein LptD OS=Escherichia coli (strain K12) GN=lptD PE=1 SV=1  
BAC0351|sitC|tr|Q9XCS0|Q9XCS0\_SALTM SitC OS=Salmonella typhimurium GN=sitC PE=3 SV=1  
BAC0166|fetB|ybbM|sp|P77307|YBBM\_ECOLI UPF0014 inner membrane protein YbbM OS=Escherichia coli (strain K12) GN=fetB PE=1 SV=1  
BAC0334|robA|sp|P0ACI0|ROB\_ECOLI Right origin-binding protein OS=Escherichia coli (strain K12) GN=robA PE=1 SV=1  
BAC0393|tolC|sp|P02930|TOLC\_ECOLI Outer membrane protein TolC OS=Escherichia coli (strain K12) GN=tolC PE=1 SV=1  
BAC0358|oscA|tr|B6CM35|B6CM35\_9PSED Putative uncharacterized protein oscA OS=Pseudomonas corrugata GN=oscA PE=4 SV=1  
BAC0149|emrD|sp|P31442|EMRD\_ECOLI Multidrug resistance protein D OS=Escherichia coli (strain K12) GN=emrD PE=1 SV=1  
BAC0218|mdtK|ydhE|sp|P37340|MDTK\_ECOLI Multidrug resistance protein MdtK OS=Escherichia coli (strain K12) GN=mdtK PE=1 SV=1  
BAC0216|mdtI|ydgE|sp|P69210|MDTI\_ECOLI Spermidine export protein MdtI OS=Escherichia coli (strain K12) GN=mdtI PE=1 SV=1  
BAC0244|mexT|tr|O87785|O87785\_PSEAI MexT protein OS=Pseudomonas aeruginosa GN=mexT PE=4 SV=1  
BAC0147|emrA|sp|P27303|EMRA\_ECOLI Multidrug resistance protein A OS=Escherichia coli (strain K12) GN=emrA PE=1 SV=1  
BAC0220|mdtN|yjcR|sp|P32716|MDTN\_ECOLI Multidrug resistance protein MdtN OS=Escherichia coli (strain K12) GN=mdtN PE=1 SV=1  
BAC0154|evgA|sp|P0ACZ4|EVGA\_ECOLI Positive transcription regulator EvgA OS=Escherichia coli (strain K12) GN=evgA PE=1 SV=1  
BAC0215|mdtG|yceE|sp|P25744|MDTG\_ECOLI Multidrug resistance protein MdtG OS=Escherichia coli (strain K12) GN=mdtG PE=1 SV=1  
BAC0491|kdeA|tr|A6T6T9|A6T6T9\_KLEP7 Multidrug/chloramphenicol efflux transport protein (MFS family) OS=Klebsiella pneumoniae GN=kdeA PE=4 SV=1  
BAC0595|arsH|tr|P74312|P74312\_SYNY3 Slr0945 protein OS=Synechocystis sp. (strain PCC 6803 / Kazusa) GN=slr0945 PE=4 SV=1  
BAC0005|acrA|sp|P0AE06|ACRA\_ECOLI Multidrug efflux pump subunit AcrA OS=Escherichia coli (strain K12) GN=acrA PE=1 SV=1  
BAC0040|baeS|sp|P30847|BAES\_ECOLI Signal transduction histidine-protein kinase BaeS OS=Escherichia coli (strain K12) GN=baeS PE=1 SV=1

BAC0531|phoR|tr|C4X6T5|C4X6T5\_KLEPN Sensor kinase in two-component regulatory system with PhoP OS=Klebsiella pneumoniae

BAC0378|sugE|sp|P69937|SUGE\_ECOLI Quaternary ammonium compound-resistance protein SugE OS=Escherichia coli

BAC0145|emhR|tr|Q4KH21|Q4KH21\_PSEF5 Transcriptional regulator EmhR OS=Pseudomonas fluorescens (strain Pf-5 / Pf-6)

BAC0185|hdeA|yhiB|sp|P0AES9|HDEA\_ECOLI Acid stress chaperone HdeA OS=Escherichia coli (strain K12) GN=hdeA PE=1 SV=1

BAC0142|emhA|tr|Q4KH22|Q4KH22\_PSEF5 Efflux transporter, membrane fusion protein subunit EmhA OS=Pseudomonas fluorescens (strain Pf-5 / Pf-6)

BAC0445|ygiW|sp|P0ADU5|YGIW\_ECOLI Protein YgiW OS=Escherichia coli (strain K12) GN=ygiW PE=1 SV=1

BAC0213|mdtE|yhiU|sp|P37636|MDTE\_ECOLI Multidrug resistance protein MdtE OS=Escherichia coli (strain K12) GN=mdtE PE=1 SV=1

BAC0359|smeE|tr|I0KXS8|I0KXS8\_STEMA RND efflux system, inner membrane transporter OS=Stenotrophomonas maltophilia

BAC0012|actP|sp|Q9X5X3|ATCU\_SINMW Copper-transporting P-type ATPase OS=Sinorhizobium medicae (strain WSM 1021)

BAC0210|mdtA|yegM|sp|P76397|MDTA\_ECOLI Multidrug resistance protein MdtA OS=Escherichia coli (strain K12) GN=mdtA PE=1 SV=1

BAC0214|mdtF|yhiV|sp|P37637|MDTF\_ECOLI Multidrug resistance protein MdtF OS=Escherichia coli (strain K12) GN=mdtF PE=1 SV=1

BAC0208|mdfA|cmr|sp|P0AEY8|MDFA\_ECOLI Multidrug transporter MdfA OS=Escherichia coli (strain K12) GN=mdfA PE=1 SV=1

BAC0177|gadX|sp|P37639|GADX\_ECOLI HTH-type transcriptional regulator GadX OS=Escherichia coli (strain K12) GN=gadX PE=1 SV=1

BAC0493|kmrA|tr|C4X8X9|C4X8X9\_KLEPN Energy-dependent efflux protein for methyl viologen resistance OS=Klebsiella pneumoniae

BAC0476|kpnE|tr|C4X7Z3|C4X7Z3\_KLEPN Multidrug transport protein OS=Klebsiella pneumoniae subsp. pneumoniae

BAC0217|mdtJ|ebrB|ydgF|sp|Q3Z1V3|MDTJ\_SHISS Spermidine export protein MdtJ OS=Shigella sonnei (strain Ss046) GN=mdtJ PE=1 SV=1

BAC0174|gadC|xasA|sp|P63235|GADC\_ECOLI Probable glutamate/gamma-aminobutyrate antiporter OS=Escherichia coli (strain K12) GN=gadC PE=1 SV=1

BAC0529|kpnO|tr|C4XBC3|C4XBC3\_KLEPN Outer membrane porin protein C OS=Klebsiella pneumoniae subsp. pneumoniae

BAC0134|dpr|dps|sp|P0CB53|DPS\_STRSU DNA protection during starvation protein OS=Streptococcus suis GN=dps PE=1 SV=1

BAC0252|mntP|yebN|sp|P76264|MNTP\_ECOLI Probable manganese efflux pump MntP OS=Escherichia coli (strain K12) GN=mntP PE=1 SV=1

BAC0011|acrR|ybaH|sp|P0ACS9|ACRR\_ECOLI HTH-type transcriptional regulator AcrR OS=Escherichia coli (strain K12) GN=acrR PE=1 SV=1

BAC0176|gadW|yhiW|sp|P63201|GADW\_ECOLI HTH-type transcriptional regulator GadW OS=Escherichia coli (strain K12) GN=gadW PE=1 SV=1

BAC0135|dpsA|tr|Q8KR86|Q8KR86\_BURPE DpsA OS=Burkholderia pseudomallei GN=dpsA PE=3 SV=1

BAC0146|emmdR|tr|D5CJ69|D5CJ69\_ENTCC MATE efflux family protein OS=Enterobacter cloacae subsp. cloacae (strain ATCC 35061)

BAC0155|evgS|sp|P58402|EVGS\_ECO57 Sensor protein EvgS OS=Escherichia coli O157:H7 GN=evgS PE=3 SV=1

BAC0477|kpnF|tr|C4X7Z4|C4X7Z4\_KLEPN Spermidine export protein MdtI OS=Klebsiella pneumoniae subsp. pneumoniae

BAC0219|mdtM|yjiO|sp|P39386|MDTM\_ECOLI Multidrug resistance protein MdtM OS=Escherichia coli (strain K12) GN=mdtM PE=1 SV=1

BAC0009|acrE|envC|sp|P24180|ACRE\_ECOLI Acriflavine resistance protein E OS=Escherichia coli (strain K12) GN=acrE PE=1 SV=1

BAC0013|adeE|tr|Q8GKU1|Q8GKU1\_ACIG3 AdeE OS=Acinetobacter sp. 4365 GN=adeE PE=4 SV=2

BAC0471|adeA|tr|Q93E20|Q93E20\_ACIBA AdeA membrane fusion protein OS=Acinetobacter baumannii GN=adeA PE=1 SV=1

BAC0424|vexB|tr|Q9KVI2|Q9KVI2\_VIBCH Multidrug resistance protein, putative OS=Vibrio cholerae serotype O1 (strain ATCC 35061)

BAC0511|vmeD|tr|Q87TN1|Q87TN1\_VIBPA Putative multidrug resistance protein OS=Vibrio parahaemolyticus serotype O3

BAC0384|tehA|sp|P25396|TEHA\_ECOLI Tellurite resistance protein TehA OS=Escherichia coli (strain K12) GN=tehA PE=1 SV=1

BAC0029|chrF|tr|A4UQR2|A4UQR2\_9RHIZ ChrF OS=Ochrobactrum tritici GN=chrF PE=4 SV=1

BAC0153|emrY|sp|P52600|EMRY\_ECOLI Multidrug resistance protein Y OS=Escherichia coli (strain K12) GN=emrY PE=1 SV=1

BAC0495|eefX|tr|A8CY68|A8CY68\_KLEPN EefX OS=Klebsiella pneumoniae GN=eefX PE=4 SV=1

BAC0434|ychH|sp|P0AB49|YCHH\_ECOLI Uncharacterized protein YchH OS=Escherichia coli (strain K12) GN=ychH PE=1 SV=1

BAC0337|sdeB|tr|Q84GI9|Q84GI9\_SERMA Putative resistance-nodulation cell division protein SdeB OS=Serratia marcescens

BAC0165|fetA|ybbL|sp|P77279|YBBL\_ECOLI Uncharacterized ABC transporter ATP-binding protein YbbL OS=Escherichia coli (strain K12) GN=fetA PE=1 SV=1

BAC0436|ydeI|sp|P31130|YDEI\_ECOLI Uncharacterized protein YdeI OS=Escherichia coli (strain K12) GN=ydeI PE=4 SV=1

BAC0141|emeA|tr|Q8GR72|Q8GR72\_ENTFL Multidrug efflux pump OS=Enterococcus faecalis GN=emeA PE=4 SV=1

BAC0385|tehB|sp|P25397|TEHB\_ECOLI Tellurite methyltransferase OS=Escherichia coli (strain K12) GN=tehB PE=1 SV=1

BAC0349|sitA|tr|Q9XCS2|Q9XCS2\_SALTI Iron transport protein, periplasmic-binding protein OS=Salmonella typhi GN=sitA PE=1 SV=1

BAC0438|ydeP|sp|P77561|YDEP\_ECOLI Protein YdeP OS=Escherichia coli (strain K12) GN=ydeP PE=2 SV=1

BAC0339|sdeY|tr|Q7WSD5|Q7WSD5\_SERMA Multidrug efflux pump SdeY OS=Serratia marcescens GN=sdeY PE=4 SV=1

BAC0195|ibpB|sp|P0C058|IBPB\_ECOLI Small heat shock protein IbpB OS=Escherichia coli (strain K12) GN=ibpB PE=1 SV=1

BAC0561|marR|sp|P27245|MARR\_ECOLI Multiple antibiotic resistance protein MarR OS=Escherichia coli (strain K12) GN=marR PE=3 SV=1

BAC0186|hdeB/yhiC|sp|P0AET2|HDEB\_ECOLI Acid stress chaperone HdeB OS=Escherichia coli (strain K12) GN=hdeB PE=3 SV=1

BAC0353|smdA|tr|A7VN01|A7VN01\_SERMA Multidrug efflux pump SmdA OS=Serratia marcescens GN=smdA PE=3 SV=1

BAC0451|yodD|sp|P64519|YODD\_ECOLI Uncharacterized protein YodD OS=Escherichia coli (strain K12) GN=yodD PE=3 SV=1

BAC0151|emrK|sp|P52599|EMRK\_ECOLI Multidrug resistance protein K OS=Escherichia coli (strain K12) GN=emrK PE=3 SV=1

BAC0596|baeR|tr|D0ZNE3|D0ZNE3\_SALT1 DNA-binding transcriptional regulator BaeR OS=Salmonella typhimurium (strain LT2 / SGSC14222) GN=baeR PE=3 SV=1

BAC0157|fabK|tr|Q9FBC5|Q9FBC5\_STREE Trans-2-enoyl-ACP reductase II OS=Streptococcus pneumoniae GN=fabK PE=3 SV=1

BAC0705|sodA|sp|P53652|SODM\_PSEAE Superoxide dismutase [Mn] OS=Pseudomonas aeruginosa (strain ATCC 15692) GN=sodA PE=3 SV=1

BAC0437|ydeO|sp|P76135|YDEO\_ECOLI HTH-type transcriptional regulator YdeO OS=Escherichia coli (strain K12) GN=ydeO PE=3 SV=1

BAC0560|marA|sp|P0ACH5|MARA\_ECOLI Multiple antibiotic resistance protein MarA OS=Escherichia coli (strain K12) GN=marA PE=3 SV=1

BAC0447|yjaA|sp|P09162|YJAA\_ECOLI Uncharacterized protein YjaA OS=Escherichia coli (strain K12) GN=yjaA PE=4 SV=1

BAC0175|gadE/yhiE|sp|P63204|GADE\_ECOLI Transcriptional regulator GadE OS=Escherichia coli (strain K12) GN=gadE PE=3 SV=1

BAC0238|mexE|tr|Q1IB41|Q1IB41\_PSEE4 Multidrug efflux RND membrane fusion protein MexE OS=Pseudomonas entomophila GN=mexE PE=3 SV=1

BAC0499|emrAsm|tr|B2FIC9|B2FIC9\_STRMK Putative multidrug resistance protein A OS=Stenotrophomonas maltophilia GN=emrAsm PE=3 SV=1

BAC0229|merG|tr|O07302|O07302\_9PSED Mercuric resistance protein OS=Pseudomonas sp. K-62 GN=merG PE=4 SV=2

BAC0150|emrE/mvrC|sp|P23895|EMRE\_ECOLI Multidrug transporter EmrE OS=Escherichia coli (strain K12) GN=emrE PE=3 SV=1

BAC0179|gesB|tr|Q8ZRG9|Q8ZRG9\_SALTY Putative cation efflux system protein OS=Salmonella typhimurium (strain LT2 / SGSC14222) GN=gesB PE=3 SV=1

BAC0526|vmeV|tr|Q87HZ7|Q87HZ7\_VIBPA Transporter, AcrB/D/F family OS=Vibrio parahaemolyticus serotype O3:K6 GN=vmeV PE=3 SV=1

BAC0159|fabV|sp|Q9KRA3|Y1738\_VIBCH Putative reductase VC\_1738/VC\_1739 OS=Vibrio cholerae serotype O1 (strain 569B) GN=fabV PE=3 SV=1

BAC0290|opmD/nmpC|sp|P37592|OMPD\_SALTY Outer membrane porin protein OmpD OS=Salmonella typhimurium (strain LT2 / SGSC14222) GN=opmD PE=3 SV=1

BAC0509|vexH|tr|Q9KTI8|Q9KTI8\_VIBCH Multidrug resistance protein, putative OS=Vibrio cholerae serotype O1 (strain 569B) GN=vexH PE=3 SV=1

BAC0044|bepE|sp|Q8G2M6|BEPE\_BRUSU Efflux pump membrane transporter BepE OS=Brucella suis biovar 1 (strain 1302) GN=bepE PE=3 SV=1

BAC0681|merR2|tr|Q9WWL1|Q9WWL1\_BACSR Mercury resistance operon negative regulator MerR2 OS=Bacillus sp. (strain ATCC 25618) GN=merR2 PE=3 SV=1

BAC0106|cuiD|sp|Q8ZRS2|CUEO\_SALTY Blue copper oxidase CueO OS=Salmonella typhimurium (strain LT2 / SGSC14222) GN=cuiD PE=3 SV=1

BAC0508|adeL|tr|A3M732|A3M732\_ACIBT Transcriptional regulator LysR family OS=Acinetobacter baumannii (strain ATCC 35061) GN=adeL PE=3 SV=1

BAC0659|merB|sp|P08664|MERB\_SERMA Alkylmercury lyase OS=Serratia marcescens GN=merB PE=3 SV=1

BAC0656|merB3|tr|Q7DHE7|Q7DHE7\_BACCE Organomercurial lyase enzyme OS=Bacillus cereus GN=merB3 PE=4 SV=1

BAC0505|farR|tr|Q7DD70|Q7DD70\_NEIMB Transcriptional regulator, MarR family OS=Neisseria meningitidis serogroup 4 GN=farR PE=3 SV=1

BAC0354|smdB|tr|A7VN02|A7VN02\_SERMA Multidrug efflux pump SmdB OS=Serratia marcescens GN=smdB PE=3 SV=1

BAC0492|kexD|tr|A6TA71|A6TA71\_KLEP7 Acridine efflux pump OS=Klebsiella pneumoniae subsp. pneumoniae (strain ATCC 49619) GN=kexD PE=3 SV=1

BAC0478|adeT1|tr|C7F8K6|C7F8K6\_ACIBA AdeT1 OS=Acinetobacter baumannii GN=adeT1 PE=4 SV=1

BAC0313|pmpM|sp|Q9I3Y3|PMPM\_PSEAE Multidrug resistance protein PmpM OS=Pseudomonas aeruginosa (strain ATCC 15692) GN=pmpM PE=3 SV=1

BAC0237|mexD|tr|Q51396|Q51396\_PSEAI RND family exporter MexD OS=Pseudomonas aeruginosa GN=mexD PE=4 SV=1

BAC0446|yhcN|sp|P64614|YHCN\_ECOLI Uncharacterized protein YhcN OS=Escherichia coli (strain K12) GN=yhcN PE=3 SV=1

BAC0450|ymgB/ariR|sp|P75993|ARIR\_ECOLI Probable two-component-system connector protein AriR OS=Escherichia coli (strain K12) GN=ymgB PE=3 SV=1

BAC0350|sitB|tr|Q9XCS1|Q9XCS1\_SALTM SitB OS=Salmonella typhimurium GN=sitB PE=3 SV=1

BAC0538|chrR|tr|Q7BD45|Q7BD45\_PSEPU Chromate reductase OS=Pseudomonas putida GN=chrR PE=4 SV=1

BAC0404|ttgA|sp|Q9WWZ9|TTGA\_PSEPT Toluene efflux pump periplasmic linker protein TtgA OS=Pseudomonas putida GN=ttgA PE=3 SV=1

BAC0223|mepC|sp|P0C071|MEPC\_PSEPU Multidrug/solvent efflux pump outer membrane protein MepC OS=Pseudomonas putida GN=mepC PE=3 SV=1

BAC0038|asr|sp|P36560|ASR\_ECOLI Acid shock protein OS=Escherichia coli (strain K12) GN=asr PE=1 SV=3

BAC0027|chrB|tr|A4UQR5|A4UQR5\_9RHIZ ChrB OS=Ochrobactrum tritici GN=chrB PE=4 SV=1

BAC0002|abeS|tr|Q2FD83|Q2FD83\_ACIBA QacEdelta1 SMR family efflux pump OS=Acinetobacter baumannii GN=qacE1 PE=3 SV=1

BAC0507|tolCsm|tr|R4ITT0|R4ITT0\_STEMA Outer membrane protein OS=Stenotrophomonas maltophilia GN=tolCsm PE=3 SV=1

BAC0650|merA|tr|O08449|O08449\_9PSED Mercuric reductase OS=Pseudomonas sp. K-62 GN=merA PE=4 SV=1

BAC0240|mexI|tr|Q9HWH4|Q9HWH4\_PSEAE Probable Resistance-Nodulation-Cell Division (RND) efflux transporter OS=Pseudomonas aeruginosa GN=mexI PE=3 SV=1

BAC0501|emrCsm|tr|B2FIC8|B2FIC8\_STRMK Putative outer membrane multidrug efflux protein OS=Stenotrophomonas maltophilia GN=emrCsm PE=3 SV=1



BAC0357|recG|tr|B5L350|B5L350\_9PSED ATP-dependent DNA helicase (Fragment) OS=Pseudomonas corrugata GN=recG PE=3 SV=1

BAC0293|ruvB|tr|B5L348|B5L348\_9PSED Malic enzyme family protein (Fragment) OS=Pseudomonas corrugata PE=3 SV=1

BAC0706|sodB|sp|P53641|SODF\_PSEAE Superoxide dismutase [Fe] OS=Pseudomonas aeruginosa (strain ATCC 15692 / DSM 41846) GN=sodB PE=3 SV=1

BAC0565|actR|sp|A6UEL7|ACTR\_SINMW Acid tolerance regulatory protein ActR OS=Sinorhizobium medicae (strain WSM 1021) GN=actR PE=3 SV=1

BAC0322|qacE|sp|P0AGC9|QACE\_ECOLX Quaternary ammonium compound-resistance protein QacE OS=Escherichia coli (strain K12) GN=qacE PE=3 SV=1

BAC0018|adeJ|tr|Q24LT7|Q24LT7\_ACIBA AdeJ OS=Acinetobacter baumannii GN=adeJ PE=4 SV=1

BAC0047|bexA|tr|Q93HR0|Q93HR0\_BACT4 BexA OS=Bacteroides thetaiotaomicron GN=bexA PE=4 SV=1

BAC0335|rpoS|sp|P35540|RPOS\_SHIFL RNA polymerase sigma factor RpoS OS=Shigella flexneri GN=rpoS PE=3 SV=3

BAC0564|actP|yjcG|sp|P32705|ACTP\_ECOLI Cation/acetate symporter ActP OS=Escherichia coli (strain K12) GN=actP PE=3 SV=1

BAC0364|smrA|tr|C7SLZ1|C7SLZ1\_STEMA ABC-type multidrug efflux pump (Fragment) OS=Stenotrophomonas maltophilia GN=smrA PE=3 SV=1

BAC0242|mexK|tr|Q9HXW4|Q9HXW4\_PSEAE Probable Resistance-Nodulation-Cell Division (RND) efflux transporter MexK OS=Escherichia coli (strain K12) GN=mexK PE=3 SV=1

BAC0019|adeK|tr|Q24LT6|Q24LT6\_ACIBA AdeK OS=Acinetobacter baumannii GN=adeK PE=4 SV=1

BAC0323|qacEdelta1|tr|Q7BQY4|Q7BQY4\_PSEAI Disinfectant resistance protein OS=Pseudomonas aeruginosa GN=qacEdelta1 PE=3 SV=1

BAC0017|adeI|tr|Q2FD95|Q2FD95\_ACIBA AdeI OS=Acinetobacter baumannii GN=adeI PE=4 SV=1

BAC0239|mexF|tr|Q4KBN7|Q4KBN7\_PSEF5 Multidrug efflux RND transporter, permease protein MexF OS=Pseudomonas aeruginosa GN=mexF PE=3 SV=1

BAC0532|cpxA|tr|C4WZK5|C4WZK5\_KLEPN Sensor protein of stress-related two-component regulatory system OS=Klebsiella pneumoniae GN=cpxA PE=3 SV=1

BAC0536|oxyRkp|tr|C4WZN6|C4WZN6\_KLEPN Activator of hydrogen peroxide-inducible genes OS=Klebsiella pneumoniae GN=oxyRkp PE=3 SV=1

BAC0533|cpXR|tr|C4WZK6|C4WZK6\_KLEPN Response regulator of stress-related two-component regulatory system OS=Klebsiella pneumoniae GN=cpXR PE=3 SV=1

BAC0194|ibpA|sp|P0C054|IBPA\_ECOLI Small heat shock protein IbpA OS=Escherichia coli (strain K12) GN=ibpA PE=1 SV=1

BAC0143|emhB|tr|C1KA85|C1KA85\_PSEFL EmhB OS=Pseudomonas fluorescens GN=emhB PE=4 SV=1

BAC0001|abeM|tr|Q5FAM9|Q5FAM9\_ACIBA Multidrug efflux pump AbeM OS=Acinetobacter baumannii GN=abeM PE=3 SV=1

BAC0368|sodA|sp|P00448|SODM\_ECOLI Superoxide dismutase [Mn] OS=Escherichia coli (strain K12) GN=sodA PE=1 SV=1

BAC0211|mdtB|yegN|sp|P76398|MDTB\_ECOLI Multidrug resistance protein MdtB OS=Escherichia coli (strain K12) GN=mdtB PE=3 SV=1

BAC0659|merB|sp|P08664|MARB\_SERMA Alkylmercury lyase OS=Serratia marcescens GN=merB PE=3 SV=1

BAC0559|emrR|sp|P0ACR9|MPRA\_ECOLI Transcriptional repressor MprA OS=Escherichia coli (strain K12) GN=mprA PE=3 SV=1

BAC0295|oqxB|tr|Q69HW2|Q69HW2\_ECOLX OqxB integral membrane protein OS=Escherichia coli GN=oqxB PE=4 SV=1

BAC0006|acrB|sp|P31224|ACRB\_ECOLI Multidrug efflux pump subunit AcrB OS=Escherichia coli (strain K12) GN=acrB PE=3 SV=1

BAC0015|adeG|tr|Q2FD81|Q2FD81\_ACIBA Cation/multidrug efflux pump OS=Acinetobacter baumannii GN=adeG PE=3 SV=1

BAC0417|vcaM|tr|Q9KKV4|Q9KKV4\_VIBCH ABC transporter, ATP-binding protein OS=Vibrio cholerae serotype O1 (strain 569B) GN=vcaM PE=3 SV=1

BAC0595|arsH|tr|P74312|P74312\_SYNY3 Slr0945 protein OS=Synechocystis sp. (strain PCC 6803 / Kazusa) GN=slr0945 PE=3 SV=1

BAC0156|fabI|sp|P0AEK4|FABI\_ECOLI Enoyl-[acyl-carrier-protein] reductase [NADH] FabI OS=Escherichia coli (strain K12) GN=fabI PE=3 SV=1

BAC0148|emrB|sp|P0AEJ0|EMRB\_ECOLI Multidrug resistance protein B OS=Escherichia coli (strain K12) GN=emrB PE=3 SV=1

BAC0246|mexW|tr|Q9HW27|Q9HW27\_PSEAE Probable Resistance-Nodulation-Cell Division (RND) efflux transporter MexW OS=Escherichia coli (strain K12) GN=mexW PE=3 SV=1

BAC0370|soxR|sp|P0ACS2|SOXR\_ECOLI Redox-sensitive transcriptional activator SoxR OS=Escherichia coli (strain K12) GN=soxR PE=3 SV=1

BAC0530|phoB|tr|C4X6T6|C4X6T6\_KLEPN Response regulator in two-component regulatory system with PhoQ OS=Klebsiella pneumoniae GN=phoB PE=3 SV=1

BAC0181|glpF|sp|P0AER0|GLPF\_ECOLI Glycerol uptake facilitator protein OS=Escherichia coli (strain K12) GN=glpF PE=3 SV=1

BAC0039|baeR|sp|P69228|BAER\_ECOLI Transcriptional regulatory protein BaeR OS=Escherichia coli (strain K12) GN=baeR PE=3 SV=1

BAC0371|soxS|sp|P0A9E2|SOXS\_ECOLI Regulatory protein SoxS OS=Escherichia coli (strain K12) GN=soxS PE=1 SV=1

BAC0196|iclR|sp|P16528|ICLR\_ECOLI Acetate operon repressor OS=Escherichia coli (strain K12) GN=iclR PE=1 SV=1

BAC0005|acrA|sp|P0AE06|ACRA\_ECOLI Multidrug efflux pump subunit AcrA OS=Escherichia coli (strain K12) GN=acrA PE=3 SV=1

BAC0149|emrD|sp|P31442|EMRD\_ECOLI Multidrug resistance protein D OS=Escherichia coli (strain K12) GN=emrD PE=3 SV=1

BAC0222|mepB|sp|P0C070|MEPB\_PSEPU Multidrug/solvent efflux pump membrane transporter MepB OS=Pseudomonas aeruginosa GN=mepB PE=3 SV=1

BAC0351|sitC|tr|Q9XCS0|Q9XCS0\_SALTM SitC OS=Salmonella typhimurium GN=sitC PE=3 SV=1

BAC0212|mdtC|yegO|sp|P76399|MDTC\_ECOLI Multidrug resistance protein MdtC OS=Escherichia coli (strain K12) GN=mdtC PE=3 SV=1

BAC0008|acrD|yffA|sp|P24177|ACRD\_ECOLI Probable aminoglycoside efflux pump OS=Escherichia coli (strain K12) GN=acrD PE=3 SV=1

BAC0446|yhcN|sp|P64614|YHCN\_ECOLI Uncharacterized protein YhcN OS=Escherichia coli (strain K12) GN=yhcN PE=3 SV=1

BAC0334|robA|sp|P0ACI0|ROB\_ECOLI Right origin-binding protein OS=Escherichia coli (strain K12) GN=rob PE=1 SV=1  
BAC0010|acrF/envD|sp|P24181|ACRF\_ECOLI Acriflavine resistance protein F OS=Escherichia coli (strain K12) GN=acrF PE=1 SV=1  
BAC0145|emhR|tr|Q4KH21|Q4KH21\_PSEF5 Transcriptional regulator EmhR OS=Pseudomonas fluorescens (strain Pf-5 / Pf-0) GN=emhR PE=1 SV=1  
BAC0434|ychH|sp|P0AB49|YCHH\_ECOLI Uncharacterized protein YchH OS=Escherichia coli (strain K12) GN=ychH PE=1 SV=1  
BAC0041|bcr|sp|P28246|BCR\_ECOLI Bicyclomycin resistance protein OS=Escherichia coli (strain K12) GN=bcr PE=1 SV=1  
BAC0541|yieF|sp|P0AGE6|YIEF\_ECOLI Uncharacterized protein YieF OS=Escherichia coli (strain K12) GN=yieF PE=1 SV=1  
BAC0185|hdeA/yhiB|sp|P0AES9|HDEA\_ECOLI Acid stress chaperone HdeA OS=Escherichia coli (strain K12) GN=hdeA PE=1 SV=1  
BAC0244|mexT|tr|O87785|O87785\_PSEAI MexT protein OS=Pseudomonas aeruginosa GN=mexT PE=4 SV=1  
BAC0393|tolC|sp|P02930|TOLC\_ECOLI Outer membrane protein TolC OS=Escherichia coli (strain K12) GN=tolC PE=1 SV=1  
BAC0061|cepA|sp|Q8RR17|FIEF\_KLEPN Cation-efflux pump FieF OS=Klebsiella pneumoniae GN=fieF PE=3 SV=1  
BAC0235|mexB|sp|P52002|MEXB\_PSEAE Multidrug resistance protein MexB OS=Pseudomonas aeruginosa (strain ATCC 27956) GN=mexB PE=1 SV=1  
BAC0215|mdtG/yceE|sp|P25744|MDTG\_ECOLI Multidrug resistance protein MdtG OS=Escherichia coli (strain K12) GN=mdtG PE=1 SV=1  
BAC0218|mdtK/ydhE|sp|P37340|MDTK\_ECOLI Multidrug resistance protein MdtK OS=Escherichia coli (strain K12) GN=mdtK PE=1 SV=1  
BAC0296|ostA/lptD|sp|P31554|LPTD\_ECOLI LPS-assembly protein LptD OS=Escherichia coli (strain K12) GN=lptD PE=1 SV=1  
BAC0491|kdeA|tr|A6T6T9|A6T6T9\_KLEP7 Multidrug/chloramphenicol efflux transport protein (MFS family) OS=Klebsiella pneumoniae GN=kdeA PE=1 SV=1  
BAC0560|marA|sp|P0ACH5|MARA\_ECOLI Multiple antibiotic resistance protein MarA OS=Escherichia coli (strain K12) GN=marA PE=1 SV=1  
BAC0176|gadW/yhiW|sp|P63201|GADW\_ECOLI HTH-type transcriptional regulator GadW OS=Escherichia coli (strain K12) GN=gadW PE=1 SV=1  
BAC0210|mdtA/yegM|sp|P76397|MDTA\_ECOLI Multidrug resistance protein MdtA OS=Escherichia coli (strain K12) GN=mdtA PE=1 SV=1  
BAC0144|emhC|tr|Q4KH24|Q4KH24\_PSEF5 Efflux transporter, outer membrane factor lipoprotein EmhC OS=Pseudomonas fluorescens (strain Pf-5 / Pf-0) GN=emhC PE=1 SV=1  
BAC0531|phoR|tr|C4X6T5|C4X6T5\_KLEPN Sensor kinase in two-component regulatory system with PhoP OS=Klebsiella pneumoniae GN=phoR PE=1 SV=1  
BAC0009|acrE/envC|sp|P24180|ACRE\_ECOLI Acriflavine resistance protein E OS=Escherichia coli (strain K12) GN=acrE PE=1 SV=1  
BAC0195|ibpB|sp|P0C058|IBPB\_ECOLI Small heat shock protein IbpB OS=Escherichia coli (strain K12) GN=ibpB PE=1 SV=1  
BAC0494|eefA|tr|A8CY69|A8CY69\_KLEPN EefA OS=Klebsiella pneumoniae GN=eefA PE=4 SV=1  
BAC0208|mdfA/cmr|sp|P0AEY8|MDFA\_ECOLI Multidrug transporter MdfA OS=Escherichia coli (strain K12) GN=mdfA PE=1 SV=1  
BAC0012|actP|sp|Q9X5X3|ATCU\_SINMW Copper-transporting P-type ATPase OS=Sinorhizobium medicae (strain WSM 162) GN=actP PE=1 SV=1  
BAC0166|fetB/ybbM|sp|P77307|YBBM\_ECOLI UPF0014 inner membrane protein YbbM OS=Escherichia coli (strain K12) GN=fetB PE=1 SV=1  
BAC0214|mdtF/yhiV|sp|P37637|MDTF\_ECOLI Multidrug resistance protein MdtF OS=Escherichia coli (strain K12) GN=mdtF PE=1 SV=1  
BAC0172|gadA|sp|P69908|DCEA\_ECOLI Glutamate decarboxylase alpha OS=Escherichia coli (strain K12) GN=gadA PE=1 SV=1  
BAC0529|kpnO|tr|C4XBC3|C4XBC3\_KLEPN Outer membrane porin protein C OS=Klebsiella pneumoniae subsp. pneumoniae GN=kpnO PE=1 SV=1  
BAC0165|fetA/ybbL|sp|P77279|YBBL\_ECOLI Uncharacterized ABC transporter ATP-binding protein YbbL OS=Escherichia coli (strain K12) GN=fetA PE=1 SV=1  
BAC0147|emrA|sp|P27303|EMRA\_ECOLI Multidrug resistance protein A OS=Escherichia coli (strain K12) GN=emrA PE=1 SV=1  
BAC0011|acrR/ybaH|sp|P0ACS9|ACRR\_ECOLI HTH-type transcriptional regulator AcrR OS=Escherichia coli (strain K12) GN=acrR PE=1 SV=1  
BAC0477|kpnF|tr|C4X7Z4|C4X7Z4\_KLEPN Spermidine export protein MdtI OS=Klebsiella pneumoniae subsp. pneumoniae GN=kpnF PE=1 SV=1  
BAC0450|ymgB/ariR|sp|P75993|ARIR\_ECOLI Probable two-component-system connector protein AriR OS=Escherichia coli (strain K12) GN=ymgB PE=1 SV=1  
BAC0437|ydeO|sp|P76135|YDEO\_ECOLI HTH-type transcriptional regulator YdeO OS=Escherichia coli (strain K12) GN=ydeO PE=1 SV=1  
BAC0294|oqxA|tr|Q69HW3|Q69HW3\_ECOLX OqxA membrane-fusion protein OS=Escherichia coli GN=oqxA PE=4 SV=1  
BAC0142|emhA|tr|Q4KH22|Q4KH22\_PSEF5 Efflux transporter, membrane fusion protein subunit EmhA OS=Pseudomonas fluorescens (strain Pf-5 / Pf-0) GN=emhA PE=1 SV=1  
BAC0359|smeE|tr|I0KSX8|I0KSX8\_STEMA RND efflux system, inner membrane transporter OS=Stenotrophomonas maltophilia GN=smeE PE=1 SV=1  
BAC0040|baeS|sp|P30847|BAES\_ECOLI Signal transduction histidine-protein kinase BaeS OS=Escherichia coli (strain K12) GN=baeS PE=1 SV=1  
BAC0029|chrF|tr|A4UQR2|A4UQR2\_9RHIZ ChrF OS=Ochrobactrum tritici GN=chrF PE=4 SV=1  
BAC0038|asr|sp|P36560|ASR\_ECOLI Acid shock protein OS=Escherichia coli (strain K12) GN=asr PE=1 SV=3  
BAC0493|kmrA|tr|C4X8X9|C4X8X9\_KLEPN Energy-dependent efflux protein for methyl viologen resistance OS=Klebsiella pneumoniae GN=kmrA PE=1 SV=1  
BAC0186|hdeB/yhiC|sp|P0AET2|HDEB\_ECOLI Acid stress chaperone HdeB OS=Escherichia coli (strain K12) GN=hdeB PE=1 SV=1  
BAC0350|sitB|tr|Q9XCS1|Q9XCS1\_SALTM SitB OS=Salmonella typhimurium GN=sitB PE=3 SV=1  
BAC0219|mdtM/yjiO|sp|P39386|MDTM\_ECOLI Multidrug resistance protein MdtM OS=Escherichia coli (strain K12) GN=mdtM PE=1 SV=1  
BAC0177|gadX|sp|P37639|GADX\_ECOLI HTH-type transcriptional regulator GadX OS=Escherichia coli (strain K12) GN=gadX PE=1 SV=1

BAC0707|sodB|sp|P0AGD3|SODF\_ECOLI Superoxide dismutase [Fe] OS=Escherichia coli (strain K12) GN=sodB PE=1 SV=1  
BAC0175|gadE/yhiE|sp|P63204|GADE\_ECOLI Transcriptional regulator GadE OS=Escherichia coli (strain K12) GN=gadE PE=1 SV=1  
BAC0358|oscA|tr|B6CM35|B6CM35\_9PSED Putative uncharacterized protein oscA OS=Pseudomonas corrugata GN=oscA PE=1 SV=1  
BAC0438|ydeP|sp|P77561|YDEP\_ECOLI Protein YdeP OS=Escherichia coli (strain K12) GN=ydeP PE=2 SV=1  
BAC0496|adeN|tr|B7H1T7|B7H1T7\_ACIB3 Bacterial regulatory protein, tetR family protein OS=Acinetobacter baumannii GN=adeN PE=1 SV=1  
BAC0220|mdtN/yjcR|sp|P32716|MDTN\_ECOLI Multidrug resistance protein MdtN OS=Escherichia coli (strain K12) GN=mdtN PE=1 SV=1  
BAC0155|evgS|sp|P58402|EVGS\_ECO57 Sensor protein EvgS OS=Escherichia coli O157:H7 GN=evgS PE=3 SV=1  
BAC0106|cuiD|sp|Q8ZRS2|CUEO\_SALTY Blue copper oxidase CueO OS=Salmonella typhimurium (strain LT2 / SGSC1422) GN=cuiD PE=1 SV=1  
BAC0151|emrK|sp|P52599|EMRK\_ECOLI Multidrug resistance protein K OS=Escherichia coli (strain K12) GN=emrK PE=1 SV=1  
BAC0013|adeE|tr|Q8GKU1|Q8GKU1\_ACIG3 AdeE OS=Acinetobacter sp. 4365 GN=adeE PE=4 SV=2  
BAC0135|dpsA|tr|Q8KR86|Q8KR86\_BURPE DpsA OS=Burkholderia pseudomallei GN=dpsA PE=3 SV=1  
BAC0498|ideR|sp|P0A672|IDER\_MYCTU Iron-dependent repressor IdeR OS=Mycobacterium tuberculosis GN=ideR PE=1 SV=1  
BAC0384|tehA|sp|P25396|TEHA\_ECOLI Tellurite resistance protein TehA OS=Escherichia coli (strain K12) GN=tehA PE=1 SV=1  
BAC0650|merA|tr|O08449|O08449\_9PSED Mercuric reductase OS=Pseudomonas sp. K-62 GN=merA PE=4 SV=1  
BAC0157|fabK|tr|Q9FBC5|Q9FBC5\_STREE Trans-2-enoyl-ACP reductase II OS=Streptococcus pneumoniae GN=fabK PE=1 SV=1  
BAC0339|sdeY|tr|Q7WSD5|Q7WSD5\_SERMA Multidrug efflux pump SdeY OS=Serratia marcescens GN=sdeY PE=4 SV=1  
BAC0216|mdtI/ydgE|sp|P69210|MDTI\_ECOLI Spermidine export protein MdtI OS=Escherichia coli (strain K12) GN=mdtI PE=1 SV=1  
BAC0451|yodD|sp|P64519|YODD\_ECOLI Uncharacterized protein YodD OS=Escherichia coli (strain K12) GN=yodD PE=1 SV=1  
BAC0238|mexE|tr|Q1IB41|Q1IB41\_PSEE4 Multidrug efflux RND membrane fusion protein MexE OS=Pseudomonas entomophila GN=mexE PE=1 SV=1  
BAC0213|mdtE/yhiU|sp|P37636|MDTE\_ECOLI Multidrug resistance protein MdtE OS=Escherichia coli (strain K12) GN=mdtE PE=1 SV=1  
BAC0153|emrY|sp|P52600|EMRY\_ECOLI Multidrug resistance protein Y OS=Escherichia coli (strain K12) GN=emrY PE=1 SV=1  
BAC0385|tehB|sp|P25397|TEHB\_ECOLI Tellurite methyltransferase OS=Escherichia coli (strain K12) GN=tehB PE=1 SV=1  
BAC0596|baeR|tr|D0ZNE3|D0ZNE3\_SALT1 DNA-binding transcriptional regulator BaeR OS=Salmonella typhimurium (strain LT2 / SGSC1422) GN=baeR PE=1 SV=1  
BAC0353|smdA|tr|A7VN01|A7VN01\_SERMA Multidrug efflux pump SmdA OS=Serratia marcescens GN=smdA PE=3 SV=1  
BAC0447|yjaA|sp|P09162|YJAA\_ECOLI Uncharacterized protein YjaA OS=Escherichia coli (strain K12) GN=yjaA PE=4 SV=1  
BAC0445|ygiW|sp|P0ADU5|YGIW\_ECOLI Protein YgiW OS=Escherichia coli (strain K12) GN=ygiW PE=1 SV=1  
BAC0027|chrB|tr|A4UQR5|A4UQR5\_9RHIZ ChrB OS=Ochrobactrum tritici GN=chrB PE=4 SV=1  
BAC0146|emmdR|tr|D5CJ69|D5CJ69\_ENTCC MATE efflux family protein OS=Enterobacter cloacae subsp. cloacae (strain ATCC 35061) GN=emmdR PE=1 SV=1  
BAC0190|hmrR|sp|Q9X5X4|HMRR\_SINMW HTH-type transcriptional regulator HmrR OS=Sinorhizobium medicae (strain SCS100) GN=hmrR PE=1 SV=1  
BAC0705|sodA|sp|P53652|SODM\_PSEAE Superoxide dismutase [Mn] OS=Pseudomonas aeruginosa (strain ATCC 15692) GN=sodA PE=1 SV=1  
BAC0349|sitA|tr|Q9XCS2|Q9XCS2\_SALTI Iron transport protein, periplasmic-binding protein OS=Salmonella typhi GN=sitA PE=1 SV=1  
BAC0472|adeB|tr|Q93E19|Q93E19\_ACIBA AdeB RND protein OS=Acinetobacter baumannii GN=adeB PE=4 SV=1  
BAC0337|sdeB|tr|Q84GI9|Q84GI9\_SERMA Putative resistance-nodulation cell division protein SdeB OS=Serratia marcescens GN=sdeB PE=4 SV=1  
BAC0378|sugE|sp|P69937|SUGE\_ECOLI Quaternary ammonium compound-resistance protein SugE OS=Escherichia coli (strain K12) GN=sugE PE=1 SV=1  
BAC0352|sitD|tr|Q9XCR9|Q9XCR9\_SALTM SitD OS=Salmonella typhimurium GN=sitD PE=3 SV=1  
BAC0134|dpr/dps|sp|P0CB53|DPS\_STRSU DNA protection during starvation protein OS=Streptococcus suis GN=dps PE=1 SV=1  
BAC0217|mdtJ|tr|Q3Z1V3|MDTJ\_SHISS Spermidine export protein MdtJ OS=Shigella sonnei (strain Ss046) GN=mdtJ PE=1 SV=1  
BAC0174|gadC/xasA|sp|P63235|GADC\_ECOLI Probable glutamate/gamma-aminobutyrate antiporter OS=Escherichia coli (strain K12) GN=gadC PE=1 SV=1  
BAC0154|evgA|sp|P0ACZ4|EVGA\_ECOLI Positive transcription regulator EvgA OS=Escherichia coli (strain K12) GN=evgA PE=1 SV=1  
BAC0561|marR|sp|P27245|MARR\_ECOLI Multiple antibiotic resistance protein MarR OS=Escherichia coli (strain K12) GN=marR PE=1 SV=1  
BAC0229|merG|tr|O07302|O07302\_9PSED Mercuric resistance protein OS=Pseudomonas sp. K-62 GN=merG PE=4 SV=2  
BAC0492|kexD|tr|A6TA71|A6TA71\_KLEP7 Acridine efflux pump OS=Klebsiella pneumoniae subsp. pneumoniae (strain ATCC 49619) GN=kexD PE=1 SV=1  
BAC0511|vmeD|tr|Q87TN1|Q87TN1\_VIBPA Putative multidrug resistance protein OS=Vibrio parahaemolyticus serotype O3:K137 GN=vmeD PE=1 SV=1  
BAC0404|ttgA|sp|Q9WWZ9|TTGA\_PSEPT Toluene efflux pump periplasmic linker protein TtgA OS=Pseudomonas putida GN=ttgA PE=1 SV=1  
BAC0499|emrAsm|tr|B2FIC9|B2FIC9\_STRMK Putative multidrug resistance protein A OS=Stenotrophomonas maltophilia GN=emrAsm PE=1 SV=1  
BAC0141|emeA|tr|Q8GR72|Q8GR72\_ENTFL Multidrug efflux pump OS=Enterococcus faecalis GN=emeA PE=4 SV=1



BAC0471|adeA|tr|Q93E20|Q93E20\_ACIBA AdeA membrane fusion protein OS=Acinetobacter baumannii GN=adeA PE=4 SV=1

BAC0237|mexD|tr|Q51396|Q51396\_PSEAI RND family exporter MexD OS=Pseudomonas aeruginosa GN=mexD PE=4 SV=1

BAC0179|gesB|tr|Q8ZRG9|Q8ZRG9\_SALTY Putative cation efflux system protein OS=Salmonella typhimurium (strain LT2) GN=gesB PE=4 SV=1

BAC0252|mntP|yebN|sp|P76264|MNTP\_ECOLI Probable manganese efflux pump MntP OS=Escherichia coli (strain K12) GN=mntP PE=4 SV=1

BAC0358|smeD|tr|I0KSX9|I0KSX9\_STEMA Membrane fusion protein of RND family multidrug efflux pump OS=Stenotrophomonas maltophilia GN=smeD PE=4 SV=1

BAC0028|chrC|tr|A4UQR3|A4UQR3\_9RHIZ Superoxide dismutase OS=Ochrobactrum tritici GN=chrC PE=3 SV=1

BAC0566|actS|tr|Q52912|Q52912\_9RHIZ Histidine protein kinase OS=Sinorhizobium medicae GN=actS PE=4 SV=1

BAC0150|emrE|mvrC|sp|P23895|EMRE\_ECOLI Multidrug transporter EmrE OS=Escherichia coli (strain K12) GN=emrE PE=4 SV=1

BAC0236|mexC|tr|Q51395|Q51395\_PSEAI Membrane fusion protein MexC OS=Pseudomonas aeruginosa GN=mexC PE=4 SV=1

BAC0436|ydeI|sp|P31130|YDEI\_ECOLI Uncharacterized protein YdeI OS=Escherichia coli (strain K12) GN=ydeI PE=4 SV=1

BAC0258|mtrD|tr|Q5F725|Q5F725\_NEIG1 Antibiotic resistance efflux pump component OS=Neisseria gonorrhoeae (strain ATCC 49229) GN=mtrD PE=4 SV=1

BAC0505|farR|tr|Q7DD70|Q7DD70\_NEIMB Transcriptional regulator, MarR family OS=Neisseria meningitidis serogroup B GN=farR PE=4 SV=1

BAC0435|yddg|emrE|sp|D0ZXP9|YDDG\_SALT1 Methyl viologen resistance protein YddG OS=Salmonella typhimurium GN=yddg PE=4 SV=1

BAC0313|pmpM|sp|Q9I3Y3|PMPM\_PSEAE Multidrug resistance protein PmpM OS=Pseudomonas aeruginosa (strain ATCC 27956) GN=pmpM PE=4 SV=1

BAC0184|hasF|tr|Q6GW09|Q6GW09\_SERMA TolC-like protein OS=Serratia marcescens PE=4 SV=1

BAC0424|vexB|tr|Q9KVI2|Q9KVI2\_VIBCH Multidrug resistance protein, putative OS=Vibrio cholerae serotype O1 (strain ATCC 35061) GN=vexB PE=4 SV=1

BAC0248|mexY|tr|Q9ZNG8|Q9ZNG8\_PSEAI MexY OS=Pseudomonas aeruginosa GN=mexY PE=4 SV=1

BAC0290|opmD|nmpC|sp|P37592|OMPD\_SALTY Outer membrane porin protein OpmD OS=Salmonella typhimurium (strain LT2) GN=opmD PE=4 SV=1

BAC0354|smdB|tr|A7VN02|A7VN02\_SERMA Multidrug efflux pump SmdB OS=Serratia marcescens GN=smdB PE=3 SV=1

BAC0207|mdeA|sp|P13254|MEGL\_PSEPU Methionine gamma-lyase OS=Pseudomonas putida GN=mdeA PE=1 SV=2

BAC0014|adeF|tr|Q2FD82|Q2FD82\_ACIBA Putative RND family drug transporter OS=Acinetobacter baumannii GN=29\_1130 PE=4 SV=1

BAC0661|merB2|tr|Q7DJN2|Q7DJN2\_BACME MerB2 OS=Bacillus megaterium GN=merB2 PE=4 SV=1

BAC0380|tbtB|tr|Q71UZ6|Q71UZ6\_PSEST Resistance nodulation cell division family member TbtB OS=Pseudomonas stuartii GN=tbtB PE=4 SV=1

BAC0506|pcm|tr|R4IUI7|R4IUI7\_STEMA Protein-L-isoaspartate O-methyltransferase OS=Stenotrophomonas maltophilia GN=pcm PE=4 SV=1

BAC0481|pdrM|sp|Q8DPQ6|NORM\_STRR6 Probable multidrug resistance protein NorM OS=Streptococcus pneumoniae (strain ATCC 49619) GN=pdrM PE=4 SV=1

BAC0173|gadB|sp|P69910|DCEB\_ECOLI Glutamate decarboxylase beta OS=Escherichia coli (strain K12) GN=gadB PE=4 SV=1

BAC0597|baeS|tr|D0ZNE2|D0ZNE2\_SALT1 Signal transduction histidine-protein kinase BaeS OS=Salmonella typhimurium GN=baeS PE=4 SV=1

BAC0479|adeT2|tr|C7F8K7|C7F8K7\_ACIBA AdeT2 OS=Acinetobacter baumannii PE=4 SV=1

BAC0662|merB3|tr|Q9RHR0|Q9RHR0\_BACME MerB3 OS=Bacillus megaterium GN=merB3 PE=4 SV=2

BAC0223|mepC|sp|P0C071|MEPC\_PSEPU Multidrug/solvent efflux pump outer membrane protein MepC OS=Pseudomonas putida GN=mepC PE=4 SV=1

BAC0367|smvA|emrB|sp|D0ZXQ3|SMVA\_SALT1 Methyl viologen resistance protein SmvA OS=Salmonella typhimurium GN=smvA PE=4 SV=1

BAC0501|emrCsm|tr|B2FIC8|B2FIC8\_STRMK Putative outer membrane multidrug efflux protein OS=Stenotrophomonas maltophilia GN=emrCsm PE=4 SV=1

BAC0240|mexI|tr|Q9HWH4|Q9HWH4\_PSEAE Probable Resistance-Nodulation-Cell Division (RND) efflux transporter OmpX OS=Pseudomonas aeruginosa GN=mexI PE=4 SV=1

BAC0509|vexH|tr|Q9KTI8|Q9KTI8\_VIBCH Multidrug resistance protein, putative OS=Vibrio cholerae serotype O1 (strain ATCC 35061) GN=vexH PE=4 SV=1

BAC0408|ttgE|sp|Q9KWW4|TTGE\_PSEPT Toluene efflux pump membrane transporter TtgE OS=Pseudomonas putida (strain ATCC 25119) GN=ttgE PE=4 SV=1

BAC0508|adeL|tr|A3M732|A3M732\_ACIBT Transcriptional regulator LysR family OS=Acinetobacter baumannii (strain ATCC 25261) GN=adeL PE=4 SV=1

BAC0044|bepE|sp|Q8G2M6|BEPE\_BRUSU Efflux pump membrane transporter BepE OS=Brucella suis biovar 1 (strain 13309) GN=bepE PE=4 SV=1

BAC0430|vmeB|tr|Q2AAU3|Q2AAU3\_VIBPH Inner membrane protein VmeB OS=Vibrio parahaemolyticus GN=vmeB PE=4 SV=1

BAC0043|bepD|sp|Q8G2M7|BEPD\_BRUSU Efflux pump periplasmic linker BepD OS=Brucella suis biovar 1 (strain 13309) GN=bepD PE=4 SV=1

BAC0159|fabV|sp|Q9KRA3|Y1738\_VC\_1738/VC\_1739 OS=Vibrio cholerae serotype O1 (strain ATCC 35061) GN=fabV PE=4 SV=1

BAC0360|smeF|tr|Q9F239|Q9F239\_STEMA Outer membrane protein OS=Stenotrophomonas maltophilia GN=smeF PE=4 SV=1

BAC0412|ttgI|sp|Q93PU3|TTGI\_PSEPT Toluene efflux pump outer membrane protein TtgI OS=Pseudomonas putida (strain ATCC 25119) GN=ttgI PE=4 SV=1

BAC0016|adeH|tr|Q2FD80|Q2FD80\_ACIBA Putative RND family drug transporter OS=Acinetobacter baumannii GN=29\_1130 PE=4 SV=1

BAC0614|cmeC|tr|Q8RTE3|Q8RTE3\_CAMJU CmeC OS=Campylobacter jejuni GN=cmeC PE=4 SV=1

BAC0526|vmeV|tr|Q87HZ7|Q87HZ7\_VIBPA Transporter, AcrB/D/F family OS=Vibrio parahaemolyticus serotype O3:K6 GN=vmeV PE=4 SV=1

BAC0419|vceB|tr|O51919|O51919\_VIBCL VceB OS=Vibrio cholerae GN=vceB PE=4 SV=1

BAC0319|qacA|sp|P0A0J9|QACA\_STAAU Antiseptic resistance protein OS=Staphylococcus aureus GN=qacA PE=1 SV=1  
BAC0411|ttgH|sp|Q93PU4|TTGH\_PSEPT Toluene efflux pump membrane transporter TtgH OS=Pseudomonas putida (strain ATCC 49619) GN=ttgH PE=1 SV=1  
BAC0500|emrBsm|tr|B2FID0|B2FID0\_STRMK Putative multidrug resistance protein B OS=Stenotrophomonas maltophilia GN=emrB PE=1 SV=1  
BAC0188|hefC|tr|B6JLJ0|B6JLJ0\_HELP2 Cytoplasmic pump protein of the HefABC efflux system HefC OS=Helicobacter pylori GN=hefC PE=1 SV=1  
BAC0427|vexF|tr|A6P7H3|A6P7H3\_VIBCL Multidrug efflux transporter VexF OS=Vibrio cholerae GN=vexF PE=4 SV=1  
BAC0521|vmeK|tr|Q87LY6|Q87LY6\_VIBPA Putative multidrug resistance protein OS=Vibrio parahaemolyticus serotype O1 GN=vmeK PE=1 SV=1  
BAC0046|bepG|sp|Q8FWV9|BEPG\_BRUSU Efflux pump membrane transporter BepG OS=Brucella suis biovar 1 (strain 1907) GN=bepG PE=1 SV=1  
BAC0688|merR2|tr|Q79B70|Q79B70\_PSEST Organomercurial resistance regulatory protein OS=Pseudomonas stutzeri GN=merR2 PE=1 SV=1  
BAC0018|adeJ|tr|Q24LT7|Q24LT7\_ACIBA AdeJ OS=Acinetobacter baumannii GN=adeJ PE=4 SV=1  
BAC0648|merA|sp|P08662|MERA\_SERMA Mercuric reductase (Fragments) OS=Serratia marcescens GN=merA PE=3 SV=1  
BAC0324|qacF|sp|Q9X2N9|QACF\_ENTAE Quaternary ammonium compound-resistance protein QacF OS=Enterobacter aerogenes GN=qacF PE=1 SV=1  
BAC0019|adeK|tr|Q24LT6|Q24LT6\_ACIBA AdeK OS=Acinetobacter baumannii GN=adeK PE=4 SV=1  
BAC0357|recG|tr|B5L350|B5L350\_9PSED ATP-dependent DNA helicase (Fragment) OS=Pseudomonas corrugata GN=recG PE=1 SV=1  
BAC0565|actR|sp|A6UEL7|ACTR\_SINMW Acid tolerance regulatory protein ActR OS=Sinorhizobium medicae (strain WSM 162) GN=actR PE=1 SV=1  
BAC0017|adeI|tr|Q2FD95|Q2FD95\_ACIBA AdeI OS=Acinetobacter baumannii GN=adeI PE=4 SV=1  
BAC0001|abeM|tr|Q5FAM9|Q5FAM9\_ACIBA Multidrug efflux pump AbeM OS=Acinetobacter baumannii GN=abeM PE=1 SV=1  
BAC0706|sodB|sp|P53641|SODF\_PSEAE Superoxide dismutase [Fe] OS=Pseudomonas aeruginosa (strain ATCC 15692 / DSM 2184) GN=sodB PE=1 SV=1  
BAC0322|qacE|sp|P0AGC9|QACE\_ECOLX Quaternary ammonium compound-resistance protein QacE OS=Escherichia coli (strain K12) GN=qacE PE=1 SV=1  
BAC0293|ruvB|tr|B5L348|B5L348\_9PSED Malic enzyme family protein (Fragment) OS=Pseudomonas corrugata GN=ruvB PE=3 SV=1  
BAC0335|rpoS|sp|P35540|RPOS\_SHIFL RNA polymerase sigma factor RpoS OS=Shigella flexneri GN=rpoS PE=3 SV=3  
BAC0564|actP|yjcG|sp|P32705|ACTP\_ECOLI Cation/acetate symporter ActP OS=Escherichia coli (strain K12) GN=actP PE=1 SV=1  
BAC0364|smrA|tr|C7SLZ1|C7SLZ1\_STEMA ABC-type multidrug efflux pump (Fragment) OS=Stenotrophomonas maltophilia GN=smrA PE=1 SV=1  
BAC0242|mexK|tr|Q9HXW4|Q9HXW4\_PSEAE Probable Resistance-Nodulation-Cell Division (RND) efflux transporter MexK OS=Pseudomonas aeruginosa GN=mexK PE=1 SV=1  
BAC0047|bexA|tr|Q93HR0|Q93HR0\_BACT4 BexA OS=Bacteroides thetaiotaomicron GN=bexA PE=4 SV=1  
BAC0239|mexF|tr|Q4KBN7|Q4KBN7\_PSEF5 Multidrug efflux RND transporter, permease protein MexF OS=Pseudomonas aeruginosa GN=mexF PE=1 SV=1  
BAC0496|adeN|tr|B7H1T7|B7H1T7\_ACIB3 Bacterial regulatory protein, tetR family protein OS=Acinetobacter baumannii GN=adeN PE=1 SV=1  
BAC0536|oxyRkp|tr|C4WZN6|C4WZN6\_KLEPN Activator of hydrogen peroxide-inducible genes OS=Klebsiella pneumoniae GN=oxyR PE=1 SV=1  
BAC0194|ibpA|sp|P0C054|IBPA\_ECOLI Small heat shock protein IbpA OS=Escherichia coli (strain K12) GN=ibpA PE=1 SV=1  
BAC0143|emhB|tr|C1KA85|C1KA85\_PSEFL EmhB OS=Pseudomonas fluorescens GN=emhB PE=4 SV=1  
BAC0533|cpxR|tr|C4WZK6|C4WZK6\_KLEPN Response regulator of stress-related two-component regulatory system OS=Klebsiella pneumoniae GN=cpxR PE=1 SV=1  
BAC0659|merB|sp|P08664|MERB\_SERMA Alkylmercury lyase OS=Serratia marcescens GN=merB PE=3 SV=1  
BAC0595|arsH|tr|P74312|P74312\_SYNY3 Slr0945 protein OS=Synechocystis sp. (strain PCC 6803 / Kazusa) GN=slr0945 PE=1 SV=1  
BAC0323|qacEdelta1|tr|Q7BQY4|Q7BQY4\_PSEAI Disinfectant resistance protein OS=Pseudomonas aeruginosa GN=qacE PE=1 SV=1  
BAC0211|mdtB|yegN|sp|P76398|MDTB\_ECOLI Multidrug resistance protein MdtB OS=Escherichia coli (strain K12) GN=mdtB PE=1 SV=1  
BAC0246|mexW|tr|Q9HW27|Q9HW27\_PSEAE Probable Resistance-Nodulation-Cell Division (RND) efflux transporter MexW OS=Pseudomonas aeruginosa GN=mexW PE=1 SV=1  
BAC0532|cpxA|tr|C4WZK5|C4WZK5\_KLEPN Sensor protein of stress-related two-component regulatory system OS=Klebsiella pneumoniae GN=cpxA PE=1 SV=1  
BAC0559|emrR|sp|P0ACR9|MPRA\_ECOLI Transcriptional repressor MprA OS=Escherichia coli (strain K12) GN=mprA PE=1 SV=1  
BAC0006|acrB|sp|P31224|ACRB\_ECOLI Multidrug efflux pump subunit AcrB OS=Escherichia coli (strain K12) GN=acrB PE=1 SV=1  
BAC0417|vcaM|tr|Q9KKV4|Q9KKV4\_VIBCH ABC transporter, ATP-binding protein OS=Vibrio cholerae serotype O1 (strain ATCC 35061 / DSM 5021) GN=vcaM PE=1 SV=1  
BAC0368|sodA|sp|P00448|SODM\_ECOLI Superoxide dismutase [Mn] OS=Escherichia coli (strain K12) GN=sodA PE=1 SV=1  
BAC0371|soxS|sp|P0A9E2|SOXS\_ECOLI Regulatory protein SoxS OS=Escherichia coli (strain K12) GN=soxS PE=1 SV=1  
BAC0196|iclR|sp|P16528|ICLR\_ECOLI Acetate operon repressor OS=Escherichia coli (strain K12) GN=iclR PE=1 SV=1  
BAC0015|adeG|tr|Q2FD81|Q2FD81\_ACIBA Cation/multidrug efflux pump OS=Acinetobacter baumannii GN=29\_167 PE=1 SV=1  
BAC0148|emrB|sp|P0AEJ0|EMRB\_ECOLI Multidrug resistance protein B OS=Escherichia coli (strain K12) GN=emrB PE=1 SV=1  
BAC0156|fabI|sp|P0AEK4|FABI\_ECOLI Enoyl-[acyl-carrier-protein] reductase [NADH] FabI OS=Escherichia coli (strain K12) GN=fabI PE=1 SV=1  
BAC0295|oqxB|tr|Q69HW2|Q69HW2\_ECOLX OqxB integral membrane protein OS=Escherichia coli GN=oqxB PE=4 SV=1

BAC0541|yieF|sp|P0AGE6|YIEF\_ECOLI Uncharacterized protein YieF OS=Escherichia coli (strain K12) GN=yieF PE=1 SV=1  
BAC0472|adeB|tr|Q93E19|Q93E19\_ACIBA AdeB RND protein OS=Acinetobacter baumannii GN=adeB PE=4 SV=1  
BAC0222|mepB|sp|P0C070|MEPB\_PSEPU Multidrug/solvent efflux pump membrane transporter MepB OS=Pseudomonas aeruginosa GN=mepB PE=1 SV=1  
BAC0010|acrF|envD|sp|P24181|ACRF\_ECOLI Acriflavine resistance protein F OS=Escherichia coli (strain K12) GN=acrF PE=1 SV=1  
BAC0370|soxR|sp|P0ACS2|SOXR\_ECOLI Redox-sensitive transcriptional activator SoxR OS=Escherichia coli (strain K12) GN=soxR PE=1 SV=1  
BAC0212|mdtC|yegO|sp|P76399|MDTC\_ECOLI Multidrug resistance protein MdtC OS=Escherichia coli (strain K12) GN=mdtC PE=1 SV=1  
BAC0530|phoB|tr|C4X6T6|C4X6T6\_KLEPN Response regulator in two-component regulatory system with PhoQ OS=Klebsiella pneumoniae GN=phoB PE=1 SV=1  
BAC0061|cepA|sp|Q8RR17|FIEF\_KLEPN Cation-efflux pump FieF OS=Klebsiella pneumoniae GN=fieF PE=3 SV=1  
BAC0008|acrD|yffA|sp|P24177|ACRD\_ECOLI Probable aminoglycoside efflux pump OS=Escherichia coli (strain K12) GN=acrD PE=1 SV=1  
BAC0351|sitC|tr|Q9XCS0|Q9XCS0\_SALTM SitC OS=Salmonella typhimurium GN=sitC PE=3 SV=1  
BAC0181|glpF|sp|P0AER0|GLPF\_ECOLI Glycerol uptake facilitator protein OS=Escherichia coli (strain K12) GN=glpF PE=1 SV=1  
BAC0172|gadA|sp|P69908|DCEA\_ECOLI Glutamate decarboxylase alpha OS=Escherichia coli (strain K12) GN=gadA PE=1 SV=1  
BAC0039|baeR|sp|P69228|BAER\_ECOLI Transcriptional regulatory protein BaeR OS=Escherichia coli (strain K12) GN=baeR PE=1 SV=1  
BAC0215|mdtG|yceE|sp|P25744|MDTG\_ECOLI Multidrug resistance protein MdtG OS=Escherichia coli (strain K12) GN=mdtG PE=1 SV=1  
BAC0244|mexT|tr|O87785|O87785\_PSEAI MexT protein OS=Pseudomonas aeruginosa GN=mexT PE=4 SV=1  
BAC0393|tolC|sp|P02930|TOLC\_ECOLI Outer membrane protein TolC OS=Escherichia coli (strain K12) GN=tolC PE=1 SV=1  
BAC0494|eefA|tr|A8CY69|A8CY69\_KLEPN EefA OS=Klebsiella pneumoniae GN=eefA PE=4 SV=1  
BAC0707|sodB|sp|P0AGD3|SODF\_ECOLI Superoxide dismutase [Fe] OS=Escherichia coli (strain K12) GN=sodB PE=1 SV=1  
BAC0029|chrF|tr|A4UQR2|A4UQR2\_9RHIZ ChrF OS=Ochrobactrum tritici GN=chrF PE=4 SV=1  
BAC0149|emrD|sp|P31442|EMRD\_ECOLI Multidrug resistance protein D OS=Escherichia coli (strain K12) GN=emrD PE=1 SV=1  
BAC0012|actP|sp|Q9X5X3|ATCU\_SINMW Copper-transporting P-type ATPase OS=Sinorhizobium medicae (strain WSM2) GN=actP PE=1 SV=1  
BAC0135|dpsA|tr|Q8KR86|Q8KR86\_BURPE DpsA OS=Burkholderia pseudomallei GN=dpsA PE=3 SV=1  
BAC0294|oqxA|tr|Q69HW3|Q69HW3\_ECOLX OqxA membrane-fusion protein OS=Escherichia coli GN=oqxA PE=4 SV=1  
BAC0476|kpnE|tr|C4X7Z3|C4X7Z3\_KLEPN Multidrug transport protein OS=Klebsiella pneumoniae subsp. pneumoniae GN=kpnE PE=1 SV=1  
BAC0217|mdtJ|ebrB|ydgF|sp|Q3Z1V3|MDTJ\_SHISS Spermidine export protein MdtJ OS=Shigella sonnei (strain Ss046) GN=mdtJ PE=1 SV=1  
BAC0296|ostA|lptD|sp|P31554|LPTD\_ECOLI LPS-assembly protein LptD OS=Escherichia coli (strain K12) GN=lptD PE=1 SV=1  
BAC0235|mexB|sp|P52002|MEXB\_PSEAE Multidrug resistance protein MexB OS=Pseudomonas aeruginosa (strain ATCC 27962) GN=mexB PE=1 SV=1  
BAC0334|robA|sp|P0ACI0|ROB\_ECOLI Right origin-binding protein OS=Escherichia coli (strain K12) GN=robA PE=1 SV=1  
BAC0147|emrA|sp|P27303|EMRA\_ECOLI Multidrug resistance protein A OS=Escherichia coli (strain K12) GN=emrA PE=1 SV=1  
BAC0142|emhA|tr|Q4KH22|Q4KH22\_PSEF5 Efflux transporter, membrane fusion protein subunit EmhA OS=Pseudomonas aeruginosa GN=emhA PE=1 SV=1  
BAC0040|baeS|sp|P30847|BAES\_ECOLI Signal transduction histidine-protein kinase BaeS OS=Escherichia coli (strain K12) GN=baeS PE=1 SV=1  
BAC0195|ibpB|sp|P0C058|IBPB\_ECOLI Small heat shock protein IbpB OS=Escherichia coli (strain K12) GN=ibpB PE=1 SV=1  
BAC0531|phoR|tr|C4X6T5|C4X6T5\_KLEPN Sensor kinase in two-component regulatory system with PhoP OS=Klebsiella pneumoniae GN=phoR PE=1 SV=1  
BAC0529|kpnO|tr|C4XBC3|C4XBC3\_KLEPN Outer membrane porin protein C OS=Klebsiella pneumoniae subsp. pneumoniae GN=kpnO PE=1 SV=1  
BAC0220|mdtN|yjcR|sp|P32716|MDTN\_ECOLI Multidrug resistance protein MdtN OS=Escherichia coli (strain K12) GN=mdtN PE=1 SV=1  
BAC0213|mdtE|yhiU|sp|P37636|MDTE\_ECOLI Multidrug resistance protein MdtE OS=Escherichia coli (strain K12) GN=mdtE PE=1 SV=1  
BAC0166|fetB|ybbM|sp|P77307|YBBM\_ECOLI UPF0014 inner membrane protein YbbM OS=Escherichia coli (strain K12) GN=fetB PE=1 SV=1  
BAC0359|smeE|tr|I0KSX8|I0KSX8\_STEMA RND efflux system, inner membrane transporter OS=Stenotrophomonas maltophilia GN=smeE PE=1 SV=1  
BAC0378|sugE|sp|P69937|SUGE\_ECOLI Quaternary ammonium compound-resistance protein SugE OS=Escherichia coli (strain K12) GN=sugE PE=1 SV=1  
BAC0214|mdtF|yhiV|sp|P37637|MDTF\_ECOLI Multidrug resistance protein MdtF OS=Escherichia coli (strain K12) GN=mdtF PE=1 SV=1  
BAC0218|mdtK|ydhE|sp|P37340|MDTK\_ECOLI Multidrug resistance protein MdtK OS=Escherichia coli (strain K12) GN=mdtK PE=1 SV=1  
BAC0009|acrE|envC|sp|P24180|ACRE\_ECOLI Acriflavine resistance protein E OS=Escherichia coli (strain K12) GN=acrE PE=1 SV=1  
BAC0491|kdeA|tr|A6T6T9|A6T6T9\_KLEP7 Multidrug/chloramphenicol efflux transport protein (MFS family) OS=Klebsiella pneumoniae GN=kdeA PE=1 SV=1  
BAC0011|acrR|ybaH|sp|P0ACS9|ACRR\_ECOLI HTH-type transcriptional regulator AcrR OS=Escherichia coli (strain K12) GN=acrR PE=1 SV=1  
BAC0041|bcr|sp|P28246|BCR\_ECOLI Bicyclomycin resistance protein OS=Escherichia coli (strain K12) GN=bcr PE=1 SV=1  
BAC0471|adeA|tr|Q93E20|Q93E20\_ACIBA AdeA membrane fusion protein OS=Acinetobacter baumannii GN=adeA PE=1 SV=1

BAC0208|mdfA|cmr|sp|P0AEY8|MDFA\_ECOLI Multidrug transporter MdfA OS=Escherichia coli (strain K12) GN=mdfA  
BAC0176|gadW|yhiW|sp|P63201|GADW\_ECOLI HTH-type transcriptional regulator GadW OS=Escherichia coli (strain K12) GN=gadW  
BAC0477|kpnF|tr|C4X7Z4|C4X7Z4\_KLEPN Spermidine export protein MdtI OS=Klebsiella pneumoniae subsp. pneumoniae GN=kpnF  
BAC0493|kmrA|tr|C4X8X9|C4X8X9\_KLEPN Energy-dependent efflux protein for methyl viologen resistance OS=Klebsiella pneumoniae subsp. pneumoniae GN=kmrA  
BAC0005|acrA|sp|P0AE06|ACRA\_ECOLI Multidrug efflux pump subunit AcrA OS=Escherichia coli (strain K12) GN=acrA  
BAC0175|gadE|yhiE|sp|P63204|GADE\_ECOLI Transcriptional regulator GadE OS=Escherichia coli (strain K12) GN=gadE  
BAC0450|yngB|ariR|sp|P75993|ARIR\_ECOLI Probable two-component-system connector protein AriR OS=Escherichia coli (strain K12) GN=yngB  
BAC0210|mdtA|yegM|sp|P76397|MDTA\_ECOLI Multidrug resistance protein MdtA OS=Escherichia coli (strain K12) GN=mdtA  
BAC0038|asr|sp|P36560|ASR\_ECOLI Acid shock protein OS=Escherichia coli (strain K12) GN=asr PE=1 SV=3  
BAC0174|gadC|xasA|sp|P63235|GADC\_ECOLI Probable glutamate/gamma-aminobutyrate antiporter OS=Escherichia coli (strain K12) GN=gadC  
BAC0434|ychH|sp|P0AB49|YCHH\_ECOLI Uncharacterized protein YchH OS=Escherichia coli (strain K12) GN=ychH PE=1 SV=1  
BAC0353|smdA|tr|A7VN01|A7VN01\_SERMA Multidrug efflux pump SmdA OS=Serratia marcescens GN=smdA PE=3 SV=1  
BAC0154|evgA|sp|P0ACZ4|EVGA\_ECOLI Positive transcription regulator EvgA OS=Escherichia coli (strain K12) GN=evgA  
BAC0146|emmdR|tr|D5CJ69|D5CJ69\_ENTCC MATE efflux family protein OS=Enterobacter cloacae subsp. cloacae (strain ATCC 35061) GN=emmdR  
BAC0445|ygiW|sp|P0ADU5|YGIW\_ECOLI Protein YgiW OS=Escherichia coli (strain K12) GN=ygiW PE=1 SV=1  
BAC0384|tehA|sp|P25396|TEHA\_ECOLI Tellurite resistance protein TehA OS=Escherichia coli (strain K12) GN=tehA PE=1 SV=1  
BAC0153|emrY|sp|P52600|EMRY\_ECOLI Multidrug resistance protein Y OS=Escherichia coli (strain K12) GN=emrY PE=1 SV=1  
BAC0144|emhC|tr|Q4KH24|Q4KH24\_PSEF5 Efflux transporter, outer membrane factor lipoprotein EmhC OS=Pseudomonas aeruginosa (strain ATCC 27962) GN=emhC  
BAC0498|ideR|sp|P0A672|IDER\_MYCTU Iron-dependent repressor IdeR OS=Mycobacterium tuberculosis (strain H37Rv) GN=ideR PE=1 SV=1  
BAC0155|evgS|sp|P58402|EVGS\_ECO57 Sensor protein EvgS OS=Escherichia coli O157:H7 GN=evgS PE=3 SV=1  
BAC0186|hdeB|yhiC|sp|P0AET2|HDEB\_ECOLI Acid stress chaperone HdeB OS=Escherichia coli (strain K12) GN=hdeB  
BAC0252|mntP|yebN|sp|P76264|MNTP\_ECOLI Probable manganese efflux pump MntP OS=Escherichia coli (strain K12) GN=mntP  
BAC0185|hdeA|yhiB|sp|P0AES9|HDEA\_ECOLI Acid stress chaperone HdeA OS=Escherichia coli (strain K12) GN=hdeA  
BAC0219|mdtM|yjiO|sp|P39386|MDTM\_ECOLI Multidrug resistance protein MdtM OS=Escherichia coli (strain K12) GN=mdtM  
BAC0560|marA|sp|P0ACH5|MARA\_ECOLI Multiple antibiotic resistance protein MarA OS=Escherichia coli (strain K12) GN=marA  
BAC0177|gadX|sp|P37639|GADX\_ECOLI HTH-type transcriptional regulator GadX OS=Escherichia coli (strain K12) GN=gadX  
BAC0151|emrK|sp|P52599|EMRK\_ECOLI Multidrug resistance protein K OS=Escherichia coli (strain K12) GN=emrK PE=1 SV=1  
BAC0650|merA|tr|O08449|O08449\_9PSED Mercuric reductase OS=Pseudomonas sp. K-62 GN=merA PE=4 SV=1  
BAC0511|vmeD|tr|Q87TN1|Q87TN1\_VIBPA Putative multidrug resistance protein OS=Vibrio parahaemolyticus serotype O1 GN=vmeD  
BAC0013|adeE|tr|Q8GKU1|Q8GKU1\_ACIG3 AdeE OS=Acinetobacter sp. 4365 GN=adeE PE=4 SV=2  
BAC0157|fabK|tr|Q9FBC5|Q9FBC5\_STREE Trans-2-enoyl-ACP reductase II OS=Streptococcus pneumoniae GN=fabK PE=1 SV=1  
BAC0705|sodA|sp|P53652|SODM\_PSEAE Superoxide dismutase [Mn] OS=Pseudomonas aeruginosa (strain ATCC 15692) GN=sodA  
BAC0436|ydeI|sp|P31130|YDEI\_ECOLI Uncharacterized protein YdeI OS=Escherichia coli (strain K12) GN=ydeI PE=4 SV=1  
BAC0451|yodD|sp|P64519|YODD\_ECOLI Uncharacterized protein YodD OS=Escherichia coli (strain K12) GN=yodD PE=1 SV=1  
BAC0437|ydeO|sp|P76135|YDEO\_ECOLI HTH-type transcriptional regulator YdeO OS=Escherichia coli (strain K12) GN=ydeO  
BAC0337|sdeB|tr|Q84GI9|Q84GI9\_SERMA Putative resistance-nodulation cell division protein SdeB OS=Serratia marcescens GN=sdeB  
BAC0495|eefX|tr|A8CY68|A8CY68\_KLEPN EefX OS=Klebsiella pneumoniae GN=eefX PE=4 SV=1  
BAC0237|mexD|tr|Q51396|Q51396\_PSEAI RND family exporter MexD OS=Pseudomonas aeruginosa GN=mexD PE=4 SV=1  
BAC0561|marR|sp|P27245|MARR\_ECOLI Multiple antibiotic resistance protein MarR OS=Escherichia coli (strain K12) GN=marR  
BAC0350|sitB|tr|Q9XCS1|Q9XCS1\_SALTM SitB OS=Salmonella typhimurium GN=sitB PE=3 SV=1  
BAC0145|emhR|tr|Q4KH21|Q4KH21\_PSEF5 Transcriptional regulator EmhR OS=Pseudomonas fluorescens (strain Pf-5) GN=emhR  
BAC0424|vexB|tr|Q9KVI2|Q9KVI2\_VIBCH Multidrug resistance protein, putative OS=Vibrio cholerae serotype O1 GN=vexB  
BAC0446|yhcN|sp|P64614|YHCN\_ECOLI Uncharacterized protein YhcN OS=Escherichia coli (strain K12) GN=yhcN PE=1 SV=1  
BAC0179|gesB|tr|Q8ZRG9|Q8ZRG9\_SALTY Putative cation efflux system protein OS=Salmonella typhimurium (strain LT2) GN=gesB  
BAC0165|fetA|ybbL|sp|P77279|YBBL\_ECOLI Uncharacterized ABC transporter ATP-binding protein YbbL OS=Escherichia coli (strain K12) GN=fetA  
BAC0339|sdeY|tr|Q7WSD5|Q7WSD5\_SERMA Multidrug efflux pump SdeY OS=Serratia marcescens GN=sdeY PE=4 SV=1

BAC0385|tehB|sp|P25397|TEHB\_ECOLI Tellurite methyltransferase OS=Escherichia coli (strain K12) GN=tehB PE=1 SV=1  
BAC0141|emeA|tr|Q8GR72|Q8GR72\_ENTFL Multidrug efflux pump OS=Enterococcus faecalis GN=emeA PE=4 SV=1  
BAC0657|merB|tr|O07303|O07303\_9PSED Alkylmercury lyase OS=Pseudomonas sp. K-62 GN=merB PE=3 SV=2  
BAC0216|mdtI|ydge|sp|P69210|MDTI\_ECOLI Spermidine export protein MdtI OS=Escherichia coli (strain K12) GN=mdtI PE=3 SV=1  
BAC0438|ydeP|sp|P77561|YDEP\_ECOLI Protein YdeP OS=Escherichia coli (strain K12) GN=ydeP PE=2 SV=1  
BAC0106|cuiD|sp|Q8ZRS2|CUEO\_SALTY Blue copper oxidase CueO OS=Salmonella typhimurium (strain LT2 / SGSC1) GN=cuiD PE=3 SV=1  
BAC0358|oscA|tr|B6CM35|B6CM35\_9PSED Putative uncharacterized protein oscA OS=Pseudomonas corrugata GN=oscA PE=3 SV=1  
BAC0352|sitD|tr|Q9XCR9|Q9XCR9\_SALTM SitD OS=Salmonella typhimurium GN=sitD PE=3 SV=1  
BAC0492|kexD|tr|A6TA71|A6TA71\_KLEP7 Acridine efflux pump OS=Klebsiella pneumoniae subsp. pneumoniae (strain ATCC 49619) GN=kexD PE=3 SV=1  
BAC0238|mexE|tr|Q1IB41|Q1IB41\_PSEE4 Multidrug efflux RND membrane fusion protein MexE OS=Pseudomonas entomophila GN=mexE PE=3 SV=1  
BAC0681|merR2|tr|Q9WWL1|Q9WWL1\_BACSR Mercury resistance operon negative regulator MerR2 OS=Bacillus sp. (strain ATCC 25419) GN=merR2 PE=3 SV=1  
BAC0526|vmeV|tr|Q87HZ7|Q87HZ7\_VIBPA Transporter, AcrB/D/F family OS=Vibrio parahaemolyticus serotype O3:K6 GN=vmeV PE=3 SV=1  
BAC0134|dpr/dps|sp|P0CB53|DPS\_STRSU DNA protection during starvation protein OS=Streptococcus suis GN=dps PE=3 SV=1  
BAC0044|bepE|sp|Q8G2M6|BEPE\_BRUSU Efflux pump membrane transporter BepE OS=Brucella suis biovar 1 (strain 1302) GN=bepE PE=3 SV=1  
BAC0150|emrE|mvrC|sp|P23895|EMRE\_ECOLI Multidrug transporter EmrE OS=Escherichia coli (strain K12) GN=emrE PE=3 SV=1  
BAC0027|chrB|tr|A4UQR5|A4UQR5\_9RHIZ ChrB OS=Ochrobactrum tritici GN=chrB PE=4 SV=1  
BAC0508|adeL|tr|A3M732|A3M732\_ACIBT Transcriptional regulator LysR family OS=Acinetobacter baumannii (strain ATCC 49619) GN=adeL PE=3 SV=1  
BAC0349|sitA|tr|Q9XCS2|Q9XCS2\_SALTI Iron transport protein, periplasmic-binding protein OS=Salmonella typhi GN=sitA PE=3 SV=1  
BAC0505|farR|tr|Q7DD70|Q7DD70\_NEIMB Transcriptional regulator, MarR family OS=Neisseria meningitidis serogroup 4 GN=farR PE=3 SV=1  
BAC0290|opmD|nmpC|sp|P37592|OMPD\_SALTY Outer membrane porin protein OpmD OS=Salmonella typhimurium (strain LT2 / SGSC1) GN=opmD PE=3 SV=1  
BAC0500|emrBsm|tr|B2FID0|B2FID0\_STRMK Putative multidrug resistance protein B OS=Stenotrophomonas maltophilia GN=emrBsm PE=3 SV=1  
BAC0229|merG|tr|O07302|O07302\_9PSED Mercuric resistance protein OS=Pseudomonas sp. K-62 GN=merG PE=4 SV=2  
BAC0404|ttgA|sp|Q9WWZ9|TTGA\_PSEPT Toluene efflux pump periplasmic linker protein TtgA OS=Pseudomonas putida GN=ttgA PE=3 SV=1  
BAC0207|mdeA|sp|P13254|MEGL\_PSEPU Methionine gamma-lyase OS=Pseudomonas putida GN=mdeA PE=1 SV=2  
BAC0435|yddg|emrE|sp|D0ZXP9|YDDG\_SALT1 Methyl viologen resistance protein YddG OS=Salmonella typhimurium GN=yddg PE=3 SV=1  
BAC0354|smdB|tr|A7VN02|A7VN02\_SERMA Multidrug efflux pump SmdB OS=Serratia marcescens GN=smdB PE=3 SV=1  
BAC0596|baeR|tr|D0ZNE3|D0ZNE3\_SALT1 DNA-binding transcriptional regulator BaeR OS=Salmonella typhimurium (strain LT2 / SGSC1) GN=baeR PE=3 SV=1  
BAC0509|vexH|tr|Q9KTI8|Q9KTI8\_VIBCH Multidrug resistance protein, putative OS=Vibrio cholerae serotype O1 (strain ATCC 35061) GN=vexH PE=3 SV=1  
BAC0566|actS|tr|Q52912|Q52912\_9RHIZ Histidine protein kinase OS=Sinorhizobium medicae GN=actS PE=4 SV=1  
BAC0499|emrAsm|tr|B2FIC9|B2FIC9\_STRMK Putative multidrug resistance protein A OS=Stenotrophomonas maltophilia GN=emrAsm PE=3 SV=1  
BAC0014|adeF|tr|Q2FD82|Q2FD82\_ACIBA Putative RND family drug transporter OS=Acinetobacter baumannii GN=29\_23 PE=3 SV=1  
BAC0184|hasF|tr|Q6GW09|Q6GW09\_SERMA TolC-like protein OS=Serratia marcescens PE=4 SV=1  
BAC0513|vmeF|tr|Q87R57|Q87R57\_VIBPA Putative multidrug resistance protein OS=Vibrio parahaemolyticus serotype O3:K6 GN=vmeF PE=3 SV=1  
BAC0223|mepC|sp|P0C071|MEPC\_PSEPU Multidrug/solvent efflux pump outer membrane protein MepC OS=Pseudomonas putida GN=mepC PE=3 SV=1  
BAC0338|sdeX|tr|Q7WSD6|Q7WSD6\_SERMA Multidrug efflux pump SdeX OS=Serratia marcescens GN=sdeX PE=4 SV=1  
BAC0028|chrC|tr|A4UQR3|A4UQR3\_9RHIZ Superoxide dismutase OS=Ochrobactrum tritici GN=chrC PE=3 SV=1  
BAC0413|ttgR|sp|Q9AIU0|TTGR\_PSEPT HTH-type transcriptional regulator TtgR OS=Pseudomonas putida (strain DOT-4) GN=ttgR PE=3 SV=1  
BAC0258|mtrD|tr|Q5F725|Q5F725\_NEIG1 Antibiotic resistance efflux pump component OS=Neisseria gonorrhoeae (strain ATCC 49229) GN=mtrD PE=3 SV=1  
BAC0326|qacH|qacI|sp|O87868|QACH\_STASA Quaternary ammonium compound-resistance protein QacH OS=Staphylococcus aureus GN=qacH PE=3 SV=1  
BAC0321|qacC|qacD|smr|sp|P14319|QACC\_STAAU Quaternary ammonium compound-resistance protein QacC OS=Staphylococcus aureus GN=qacC PE=3 SV=1  
BAC0506|pcm|tr|R4IUI7|R4IUI7\_STEMA Protein-L-isoaspartate O-methyltransferase OS=Stenotrophomonas maltophilia GN=pcm PE=3 SV=1  
BAC0656|merB3|tr|Q7DHE7|Q7DHE7\_BACCE Organomercurial lyase enzyme OS=Bacillus cereus GN=merB3 PE=4 SV=1  
BAC0002|abeS|tr|Q2FD83|Q2FD83\_ACIBA QacEdelta1 SMR family efflux pump OS=Acinetobacter baumannii GN=qacE PE=3 SV=1  
BAC0654|merB1|sp|P16172|MERB\_BACCE Alkylmercury lyase OS=Bacillus cereus GN=merB1 PE=3 SV=2  
BAC0240|mexI|tr|Q9HWH4|Q9HWH4\_PSEAE Probable Resistance-Nodulation-Cell Division (RND) efflux transporter OS=Pseudomonas entomophila GN=mexI PE=3 SV=1  
BAC0479|adeT2|tr|C7F8K7|C7F8K7\_ACIBA AdeT2 OS=Acinetobacter baumannii PE=4 SV=1

BAC0313|pmpM|sp|Q9I3Y3|PMPM\_PSEAE Multidrug resistance protein PmpM OS=Pseudomonas aeruginosa (strain ATCC 27604) GN=pmpM PE=4 SV=1  
BAC0016|adeH|tr|Q2FD80|Q2FD80\_ACIBA Putative RND family drug transporter OS=Acinetobacter baumannii GN=adeH PE=4 SV=1  
BAC0367|smvA|emrB|sp|D0ZXQ3|SMVA\_SALT1 Methyl viologen resistance protein SmvA OS=Salmonella typhimurium GN=smvA PE=4 SV=1  
BAC0447|yjaA|sp|P09162|YJAA\_ECOLI Uncharacterized protein YjaA OS=Escherichia coli (strain K12) GN=yjaA PE=4 SV=1  
BAC0358|smeD|tr|I0KSX9|I0KSX9\_STEMA Membrane fusion protein of RND family multidrug efflux pump OS=Stenotrophomonas maltophilia GN=smeD PE=4 SV=1  
BAC0507|tolCsm|tr|R4ITT0|R4ITT0\_STEMA Outer membrane protein OS=Stenotrophomonas maltophilia GN=tolCsm PE=4 SV=1  
BAC0478|adeT1|tr|C7F8K6|C7F8K6\_ACIBA AdeT1 OS=Acinetobacter baumannii GN=adeT1 PE=4 SV=1  
BAC0473|adeC|tr|Q93E18|Q93E18\_ACIBA AdeC outer membrane protein OS=Acinetobacter baumannii GN=adeC PE=4 SV=1  
BAC0597|baeS|tr|D0ZNE2|D0ZNE2\_SALT1 Signal transduction histidine-protein kinase BaeS OS=Salmonella typhimurium GN=baeS PE=4 SV=1  
BAC0419|vceB|tr|O51919|O51919\_VIBCL VceB OS=Vibrio cholerae GN=vceB PE=4 SV=1  
BAC0260|mtrF|tr|B4RN92|B4RN92\_NEIG2 Antibiotic resistance efflux pump component OS=Neisseria gonorrhoeae (strain ATCC 49619) GN=mtrF PE=4 SV=1  
BAC0538|chrR|tr|Q7BD45|Q7BD45\_PSEPU Chromate reductase OS=Pseudomonas putida GN=chrR PE=4 SV=1  
BAC0236|mexC|tr|Q51395|Q51395\_PSEAI Membrane fusion protein MexC OS=Pseudomonas aeruginosa GN=mexC PE=4 SV=1  
BAC0043|bepD|sp|Q8G2M7|BEPD\_BRUSU Efflux pump periplasmic linker BepD OS=Brucella suis biovar 1 (strain 1330) GN=bepD PE=4 SV=1  
BAC0159|fabV|sp|Q9KRA3|Y1738\_VIBCH Putative reductase VC\_1738/VC\_1739 OS=Vibrio cholerae serotype O1 (strain ATCC 35061) GN=fabV PE=4 SV=1  
BAC0661|merB2|tr|Q7DJN2|Q7DJN2\_BACME MerB2 OS=Bacillus megaterium GN=merB2 PE=4 SV=1  
BAC0248|mexY|tr|Q9ZNG8|Q9ZNG8\_PSEAI MexY OS=Pseudomonas aeruginosa GN=mexY PE=4 SV=1  
BAC0173|gadB|sp|P69910|DCEB\_ECOLI Glutamate decarboxylase beta OS=Escherichia coli (strain K12) GN=gadB PE=4 SV=1  
BAC0360|smeF|tr|Q9F239|Q9F239\_STEMA Outer membrane protein OS=Stenotrophomonas maltophilia GN=smeF PE=4 SV=1  
BAC0291|oprJ|sp|Q51397|OPRJ\_PSEAE Outer membrane protein OprJ OS=Pseudomonas aeruginosa (strain ATCC 15692) GN=oprJ PE=4 SV=1  
BAC0501|emrCsm|tr|B2FIC8|B2FIC8\_STRMK Putative outer membrane multidrug efflux protein OS=Stenotrophomonas maltophilia GN=emrCsm PE=4 SV=1  
BAC0170|frnE|tr|Q9RWK7|Q9RWK7\_DEIRA FrnE protein OS=Deinococcus radiodurans (strain ATCC 13939 / DSM 20589) GN=frnE PE=4 SV=1  
BAC0521|vmeK|tr|Q87LY6|Q87LY6\_VIBPA Putative multidrug resistance protein OS=Vibrio parahaemolyticus serotype O1 (strain ATCC 35061) GN=vmeK PE=4 SV=1  
BAC0380|tbtB|tr|Q71UZ6|Q71UZ6\_PSEST Resistance nodulation cell division family member TbtB OS=Pseudomonas putida (strain ATCC 49619) GN=tbtB PE=4 SV=1  
BAC0411|ttgH|sp|Q93PU4|TTGH\_PSEPT Toluene efflux pump membrane transporter TtgH OS=Pseudomonas putida (strain ATCC 49619) GN=ttgH PE=4 SV=1  
BAC0046|bepG|sp|Q8FWV9|BEPG\_BRUSU Efflux pump membrane transporter BepG OS=Brucella suis biovar 1 (strain 1330) GN=bepG PE=4 SV=1  
BAC0241|mexJ|tr|Q9HXW3|Q9HXW3\_PSEAE Probable Resistance-Nodulation-Cell Division (RND) efflux membrane fusion protein OS=Pseudomonas aeruginosa GN=mexJ PE=4 SV=1  
BAC0474|adeD|tr|Q67GM1|Q67GM1\_ACIG3 AdeD OS=Acinetobacter sp. 4365 GN=adeD PE=4 SV=1  
BAC0234|mexA|sp|P52477|MEXA\_PSEAE Multidrug resistance protein MexA OS=Pseudomonas aeruginosa (strain ATCC 27604) GN=mexA PE=4 SV=1  
BAC0503|farA|tr|Q9RQ30|Q9RQ30\_NEIGO Efflux pump protein FarA OS=Neisseria gonorrhoeae GN=farA PE=4 SV=1  
BAC0418|vceA|tr|O51918|O51918\_VIBCL VceA OS=Vibrio cholerae GN=vceA PE=4 SV=1  
BAC0042|bepC|sp|Q8G0Y6|BEPD\_BRUSU Outer membrane efflux protein BepC OS=Brucella suis biovar 1 (strain 1330) GN=bepC PE=4 SV=1  
BAC0412|ttgI|sp|Q93PU3|TTGI\_PSEPT Toluene efflux pump outer membrane protein TtgI OS=Pseudomonas putida (strain ATCC 49619) GN=ttgI PE=4 SV=1  
BAC0292|oprM|oprK|sp|Q51487|OPRM\_PSEAE Outer membrane protein OprM OS=Pseudomonas aeruginosa (strain ATCC 27604) GN=oprM PE=4 SV=1  
BAC0025|amvA|tr|C4PAW9|C4PAW9\_ACIBA Major facilitator superfamily efflux pump OS=Acinetobacter baumannii GN=amvA PE=4 SV=1  
BAC0319|qacA|sp|P0A0J9|QACA\_STAAU Antiseptic resistance protein OS=Staphylococcus aureus GN=qacA PE=1 SV=1  
BAC0408|ttgE|sp|Q9KWV4|TTGE\_PSEPT Toluene efflux pump membrane transporter TtgE OS=Pseudomonas putida (strain ATCC 49619) GN=ttgE PE=4 SV=1  
BAC0430|vmeB|tr|Q2AAU3|Q2AAU3\_VIBPH Inner membrane protein VmeB OS=Vibrio parahaemolyticus GN=vmeB PE=4 SV=1  
BAC0427|vexF|tr|A6P7H3|A6P7H3\_VIBCL Multidrug efflux transporter VexF OS=Vibrio cholerae GN=vexF PE=4 SV=1  
BAC0515|vmeZ|tr|Q87GX5|Q87GX5\_VIBPA Putative acriflavin resistance protein OS=Vibrio parahaemolyticus serotype O1 (strain ATCC 35061) GN=vmeZ PE=4 SV=1

January); A (April); STP (sewage treatment plant); inf (influent); T (treated).

**Relativ abundance**

---

0.0464085353258943  
0.0367843207742229  
0.0323810361849341  
0.0280635646936096  
0.0192187527213741  
0.0177579479599696  
0.00985448850130247  
0.00900501196761978  
0.00845150361509899  
0.00814151766935487  
0.00773473870483933  
0.00772552771544623  
0.00710590871262758  
0.00653996110859636  
0.00642231369548624  
0.00614854198987738  
0.00549291496602308  
0.00547393706935791  
0.00540623727855957  
0.00540506311937726  
0.00521295141523675  
0.00517511311707776  
0.00508844854334679  
0.00502727593790765  
0.0048508237321438  
0.0047139739752217  
0.00469482734801054  
0.00450580176357426  
0.00449214597967334  
0.00443260406442654  
0.00438171957899307  
0.00428535364306287  
0.00416718967001666  
0.00406350258007017  
0.00404188820464426  
0.00391851907338055  
0.00391140528598899  
0.00387218523298585  
0.00364689347934253  
0.00363254683547703  
0.00348741021662397  
0.00343567881187609  
0.00336558801292229

0.00323970426289207  
0.00306134302607856  
0.00295548244161512  
0.0029528820562427  
0.00294157398310024  
0.00287393998966589  
0.00283904854349821  
0.00277619220308052  
0.00277117385459262  
0.00274125174052352  
0.00272496151501631  
0.00264922400352023  
0.00264844550689857  
0.00264399777252333  
0.00263941633625981  
0.00254636048012988  
0.00252880473063295  
0.00243933295462454  
0.0023598601940159  
0.00235217527855443  
0.00234490716283262  
0.00233516398268318  
0.00224413628065551  
0.00217421482161021  
0.00213589198115791  
0.00213330145116257  
0.00211647811132403  
0.00206089526345771  
0.00205405262300237  
0.00201171221481152  
0.00200566584920238  
0.00191887621836646  
0.00191202308901516  
0.00190317418751871  
0.00188558959008868  
0.00185233775729802  
0.00180922614874552  
0.00176623833736004  
0.00174461092914747  
0.00173964052763993  
0.00170584179738864  
0.00158422086628732  
0.00155712086572361  
0.00154254830601136  
0.00153784222643369  
0.00152098042101717



0.00148169382871401  
0.00143965861226397  
0.00140656301198204  
0.00138041605504934  
0.00136634266441719  
0.00133582759687169  
0.00133526663903426  
0.00133237584597538  
0.00132511680816322  
0.00131066098843781  
0.00129705551104918  
0.00125829638164632  
0.00123356328323558  
0.00117599699668459  
0.00116804435427252  
0.00115210155698418  
0.00112039233981947  
0.00111354655094109  
0.00110902083637045  
0.00109597353241315  
0.00106844063902294  
0.00104889089347526  
0.00104852879075024  
0.00104584713143886  
0.000999968743593027  
0.000992213945211233  
0.000978761687026269  
0.000879484933417964  
0.000842060042634221  
0.000772763099247003  
0.000765375306711181  
0.000706728964353721  
0.000693363889383135  
0.000639082024473622  
0.000619746937971725  
0.000592828956506423  
0.000557374911263672  
0.000546626383803447  
0.000532125337866331  
0.000510809506281918  
0.000484028156481194  
0.000481622701633647  
0.000452306537186382  
0.000450590003838426  
0.000449807606041705  
0.00042925400717161

0.000420750267150122  
0.000404586122712589  
0.000394152839548132  
0.000393645621100776  
0.000379401865074103  
0.000367638318402724  
0.000353225635621978  
0.000317505820438716  
0.000281852738306054  
0.000280098084954869  
0.000267813081228778  
0.00025699235067408  
0.000230768641421623  
0.00022920939384445  
0.00022723534164866  
0.000213558776637638  
0.000210375133575061  
0.000205593880539264  
0.000195132245025098  
0.000182608229298849  
0.000172636082895565  
0.000172636082895565  
0.00017260229892631  
0.000161218171670393  
0.000160014105136691  
0.000156688176854404  
0.000155372474606009  
0.000142018227660805  
0.000138461184852974  
0.000126225080145036  
0.000113076634296595  
0.00010253800591127  
0.000102280372730588  
0.000101515182909661  
0.0000969228293970818  
0.0000883411205442152  
0.0000881116630882562  
0.0000871682833978038  
0.0000869820263819965  
0.0000860989601243112  
0.0000841065874933355  
0.00008376046984933  
0.0000729526672881261  
0.0000648623141280662  
0.0000619597996145728  
0.0000589965048503976

0.0000583621338305009  
0.0000582368931999633  
0.0000582368931999633  
0.0000560710583288903  
0.0000559554478993462  
0.0000546044109279334  
0.0000515285928440182  
0.0000464698497109296  
0.0000461537282843246  
0.0000426704280364511  
0.0000381514417495542  
0.0000335871190979986  
0.0000323384082831064  
0.0000318525730412945  
0.0000315856520381551  
0.0000312654288377683  
0.0000299540753103564  
0.0000287482968550666  
0.0000285067145285534  
0.0000276922369705948  
0.0000257724522613323  
0.0000184866432092526  
0.0000184364077657492  
0.0000180441437707333  
0.0000177143552422865  
0.0000172197920248622  
0.0000168771095965067  
0.0000148785045127099  
0.0000144353150165866  
0.0000141640878033313  
0.0000133818502126148  
0.0000127290770315116  
6.52365197864974E-06  
6.48623141280662E-06  
6.46152195980545E-06  
0.0272050507455579  
0.0267527540849148  
0.0189737789815173  
0.0178576743355457  
0.0172488899831975  
0.0138360080079124  
0.0115492567713583  
0.00909517968712438  
0.00749882809012172  
0.00734364506190013  
0.00673044922873786

0.00651365990108019  
0.00651061043483437  
0.00529538700643462  
0.00507320293623457  
0.00489947576829065  
0.0048220055092948  
0.00481079588780864  
0.00479135832866598  
0.00452819599222766  
0.00450246760590818  
0.0044937254892511  
0.00444853097326761  
0.00443418550092556  
0.00439924458996107  
0.00427324700724645  
0.0042363096051477  
0.00404767564740775  
0.00377121296392749  
0.0035512420553642  
0.00351261360661114  
0.00348488370472147  
0.00346854256040747  
0.00338393429895646  
0.00336676194859203  
0.00330115458667658  
0.00326664774430714  
0.00323357420795512  
0.0030674042825642  
0.00305068603232239  
0.00301232395798565  
0.00298002751821134  
0.00283318871669715  
0.0028115613219132  
0.00279026161492901  
0.00277952983948698  
0.00275248244412726  
0.00272299397715348  
0.00266705525790617  
0.00265687349870314  
0.00265074853418256  
0.00254858541206114  
0.00251977707062467  
0.00251920762947876  
0.00250554104197707  
0.00244224211372342  
0.00242631444776436

0.00235257351846956  
0.00234668156332491  
0.00234199007679287  
    0.00232917022436  
0.00231450272206093  
0.00226390394720407  
0.00223220929194321  
0.00219561569699332  
0.00215611124789969  
0.00211625036768642  
0.00209269621119676  
0.00208185322564651  
0.00207925276658521  
0.00205260624546502  
0.00203379068821492  
0.00199104095135638  
0.00191654333146639  
    0.0018783224529766  
    0.0018098994258999  
0.00176450829744082  
0.00175871035122798  
0.00174811571055793  
0.00168180152132707  
0.00152196088087037  
0.00150356066296693  
0.00147083557996258  
0.00146227614044408  
0.00145457247094043  
0.00142724379280256  
0.00140171782732977  
0.00137333188859787  
0.00136777530143579  
0.00136755905237627  
0.00136268590496533  
0.00133388116225874  
0.00133388116225874  
0.00133113398143402  
0.00131306428937836  
0.00129779609996698  
0.00122312837914696  
0.00119582640639814  
0.00118929183587138  
    0.0010764461052518  
0.00104169766957349  
0.00103025044243532  
0.00101464058724691

0.00100028246572926  
0.000975615949275879  
0.00094987629444392  
0.000941115907011631  
0.000922400533860831  
0.000864778418186232  
0.000837078484478704  
0.000792296507942806  
0.000790940300294839  
0.000734567890767167  
0.000667138479821477  
0.000629257812268858  
0.000622091114148108  
0.000614369529892627  
0.000588549909189245  
0.000585435601101857  
0.000581537490887009  
0.000562216892560324  
0.000550639863287699  
0.000539832960566677  
0.000522314982104938  
0.000517780505863116  
0.000513995560644818  
0.000513995560644818  
0.000507320293623457  
0.000490595448778728  
0.000477245912757538  
0.000462355489178989  
0.000440002793123421  
0.000435978377332658  
0.000431642680762499  
0.000409579686595084  
0.00037345757752396  
0.000346078959991195  
0.000344476742583829  
0.000344476742583829  
0.00034283077862609  
0.000325079023098526  
0.000311221487819005  
0.000287314067279819  
0.000255987304121928  
0.000247783849974391  
0.000243321392012767  
0.000223008540108503  
0.000219922097728395  
0.000213608544683561

0.000212591361137448  
0.000158312715740653  
0.000138646539872249  
0.000135285411632921  
0.00011595892425679  
0.000109207890995264  
0.000106295680568724  
0.000104308845417907  
0.000104308845417907  
0.000102394921648771  
0.0000987703226523545  
0.000095940227447416  
0.0000958029739031421  
0.0000955978283487457  
0.0000851988279367638  
0.0000850365444549795  
0.0000764455236966853  
0.0000759254861205174  
0.000074406976398107  
0.0000600056261275057  
0.000059367268402745  
0.0000588455876610688  
0.0000567992186245092  
0.0000556660671307534  
0.0000526464455646984  
0.0000519118439986793  
0.0000514333938235763  
0.0000485262889552872  
0.0000467968405019541  
0.0000465043602488169  
0.0000430928434738072  
0.0000424778171635245  
0.0000422766911352881  
0.0000357725848067822  
0.0000320106495020537  
0.0000319191033166331  
0.0000313806367189767  
0.000028765583659062  
0.0000283275290855737  
0.0000282558138220659  
0.0000281134671529371  
0.0000247473313962662  
0.0000240022504510022  
0.0000230124669272496  
0.0000226850537799106  
0.0000224568339229699

0.0000210189198864709  
0.0000121978649832962  
0.0000105992843871947  
0.0174169741179377  
0.0166452177135879  
0.0138984821172863  
0.00975971500660258  
0.00608932060751207  
0.00568454845147645  
0.00531496797249099  
0.00457539562814247  
0.00412437293164879  
0.00365931223157563  
0.00292901895860166  
0.00281289784059212  
0.00276006926424486  
0.00266274450781969  
0.00261270451578189  
0.00247768949496634  
0.00242343130808122  
0.00236129204377145  
0.00215121490451728  
0.00198642785650062  
0.00195669247766757  
0.00193776914135242  
0.00191369279318972  
0.00189103188527078  
0.00184353855324729  
0.00179296435971919  
0.00176397500307943  
0.00172295232858921  
0.0017109873818629  
0.00170628686707756  
0.0017008631961714  
0.00164804135778098  
0.00163549281952377  
0.00160405067049647  
0.00157038222991591  
0.00149497899249089  
0.00143196482420525  
0.00142374694860006  
0.00138611635999019  
0.00137803647055246  
0.00135133515967781  
0.0013441472067008  
0.00131159000792258



0.00127933779461301  
0.00125977490168294  
0.00117307392584797  
0.00105291531191563  
0.00104387741224253  
0.0010199324226267  
0.00101843697676474  
0.001010798699439  
0.00098670765538544  
0.000953844505761644  
0.000937121556385268  
0.000926890699292525  
0.000920917182433497  
0.000910894176820035  
0.000908515497710059  
0.000900026239226512  
0.000893693972064975  
0.000889787587534336  
0.000886382788092241  
0.000865780470611568  
0.000861476164294607  
0.000851061081133878  
0.000842332249532505  
0.000832059905026011  
0.000828523524130333  
0.00082658772150386  
0.00080263216400126  
0.000795904487747249  
0.000771226280416125  
0.000759618261101457  
0.000755352288982953  
0.000733850065880592  
0.000705351034195908  
0.000701943541277087  
0.000689180931435686  
0.000686683899075412  
0.000680345278468562  
0.000673593640579305  
0.000668639650632554  
0.000640584840116503  
0.000623544652251335  
0.00062139264309775  
0.000616340670389638  
0.000615340117353291  
0.00059792705093488  
0.000584952951064239

0.000579586410228788  
0.000577599256822289  
0.00056155483302167  
0.000545164273174591  
0.000542909457706497  
0.000541499303270896  
0.000534474777622148  
0.000532957133191863  
0.000521627769205909  
0.000517221556730485  
0.000508303943683408  
0.000502527762505187  
0.000498749358275825  
0.000496001427927198  
0.000470451522345282  
0.000443044884494369  
0.000433553363729966  
0.000425215799042851  
0.000424430978446611  
0.000421166124766252  
0.000420341924913481  
0.000407580120741534  
0.000404869491159819  
0.00040202221000415  
0.000396750697243571  
0.000379049512289627  
0.000374554854041133  
0.000358439255120215  
0.000350971770638543  
0.000347114937994164  
0.000340172639234281  
0.000315874593574689  
0.000315874593574689  
0.000313264059743493  
0.000310996221473149  
0.000310396999466457  
0.000301859679866597  
0.000297994899598763  
0.000274673559630164  
0.000272978043829978  
0.000266467143964588  
0.0002485570572391  
0.000236905945181017  
0.000213428779442357  
0.000211186452246688  
0.000204371763682958

0.000200368212342153  
0.000198976121936812  
0.000185808584455699  
0.000185632462574699  
0.000143579360715767  
0.000122372723903027  
0.00011747402240381  
0.000116451463069009  
0.000114863488572614  
0.000112525300510067  
0.000110188811712101  
0.000109026705356556  
0.000105291531191563  
0.0000881510493696808  
0.0000867957666348509  
0.0000865409845410108  
0.0000865409845410108  
0.0000822590087434087  
0.0000796322504810141  
0.0000747000728048252  
0.000072950252557665  
0.0000679300201235891  
0.0000622412992265398  
0.0000607451141489787  
0.0000595989799197527  
0.0000574317442863071  
0.0000562388000429714  
0.0000542273980385733  
0.000054111279413223  
0.0000523549050123794  
0.0000500395395761884  
0.0000489728052053782  
0.000048783721015396  
0.0000482251287900289  
0.0000481027299859933  
0.0000480874738077548  
0.000047619285463521  
0.0000415624465229854  
0.0000330758736727423  
0.0000326485368035854  
0.000031906524603504  
0.000031508687638373  
0.0000312747122351177  
0.0000306972394144499  
0.0000304604236812622  
0.000030198335905802

0.0000296039919001583  
0.0000279535038561672  
0.0000264884355198901  
0.0000168916894959727  
0.0000165379368363711  
0.0000160750429300096  
0.0000159936503075792  
0.0000158333129611373  
0.0000140077425088554  
0.0000135860040247178  
0.0000131889183120955  
0.0000127112512504905  
0.0000121140783729507  
0.0000119990348936254  
0.000011764416892912  
6.03966718116041E-06  
6.03966718116041E-06  
6.01665892523218E-06  
0.020453502188662  
0.0180052889999286  
0.0164508217956181  
0.013297896236875  
0.00806613792009467  
0.0077294597842543  
0.00624880718735313  
0.00522688878853262  
0.00506981130162335  
0.00407322947796173  
0.00405932402018507  
0.00390482088213954  
0.00323462340896961  
0.00289275264216794  
0.00279044369170875  
0.00240953888252815  
0.00230048647620683  
0.00221190410953304  
0.00190318226348321  
0.00184709369528592  
0.00180357144660714  
0.00178311857453221  
0.00167059424306504  
0.00160350164249205  
0.00157345704964441  
0.00140650825582332  
0.00139577155158039  
0.00138987724604162

0.00133656839160666  
0.00131780953698761  
0.00130098092796911  
0.00128916150357484  
0.00128358071784508  
0.001262500012625  
0.00117928978452017  
0.00109817461415634  
0.00109311390164871  
0.00108719286801478  
0.00105552705632503  
0.00104257083622438  
0.00102953870077157  
0.001022105933566  
0.000994092300628958  
0.000962623649246018  
0.000921783873022428  
0.00091011886439775  
0.000890794000324249  
0.000874472377939315  
0.00085944100238323  
0.000841155023609118  
0.00078360797276118  
0.000766373193301623  
0.000762446946399979  
0.000738958618871562  
0.000723796904784866  
0.000718118007727478  
0.000705969394814796  
0.000691158848070429  
0.000686889140900882  
0.000683984188747899  
0.000661577810150985  
0.000658904768493809  
0.000652215379981182  
0.000648812135278368  
0.000634724776989449  
0.000617723220462946  
0.000608219786301978  
0.000605116624126968  
0.000581386560435714  
0.000581386560435714  
0.000578550528433589  
0.000575742030722746  
0.00057259986178933  
0.000571427047623111

0.000567090169605328  
0.000564775515851836  
0.000564775515851836  
0.000539103901494935  
0.000539103901494935  
0.000532192313014231  
0.000513432287138033  
0.000494178576370357  
0.000466093457761642  
0.000452500865110206  
0.000447953579352107  
0.000433912896325191  
0.000432857147185714  
0.000415941887926954  
0.000411815480308631  
0.000408412046587072  
0.000406174172359197  
0.000406174172359197  
0.000402238376115407  
0.000368005322828989  
0.0003677608010198  
0.000367570841928364  
0.000366058204718783  
0.00036368120338944  
0.00036330588739007  
0.000362699872565399  
0.000361594080270993  
0.000359402600996623  
0.000352984697407398  
0.000349419195413383  
0.000333904443493484  
0.000332620195633894  
0.000329452384246904  
0.000329452384246904  
0.00032816546087094  
0.000324051525488758  
0.000322290375893711  
0.000320956477489821  
0.000307488891963777  
0.000304109893150989  
0.000301788443584951  
0.000301022483068237  
0.000291646372939883  
0.000286480334127743  
0.000282119073094399  
0.000278410465560764

0.000274543653539087  
0.000274543653539087  
0.0002675755405051  
0.000263561907397523  
0.000255389445152639  
0.000247089288185178  
0.000244038803145855  
0.000243437722349929  
0.000234393000649971  
0.000233470193560798  
0.000233470193560798  
0.000225910206340734  
0.000215380493333327  
0.0002011922957233  
0.000182185650274786  
0.000179701300498311  
0.000177997970635768  
0.000174587131985602  
0.000172531173795137  
0.000163816102664206  
0.000162182158268263  
0.000159867474753493  
0.000153233667091583  
0.000147515992946375  
0.000146640527112865  
0.000139861861236893  
0.000136012452212024  
0.000135391390786399  
0.000133561777397393  
0.000133304432932273  
0.000130046993781672  
0.000124321654432794  
0.000113713191111108  
0.000113604270429967  
0.000112313312811444  
0.000108610676125353  
0.000106274962660291  
0.000102953870077157  
0.000102103011646768  
0.000096897760072619  
0.000095034341609684  
0.0000906749681413499  
0.0000874652347558154  
0.0000868503649157042  
0.0000864452320181383  
0.0000795458473030756

0.0000763210156556536  
0.0000748755418742965  
0.0000744992828699031  
  0.000067235180458552  
  0.000067235180458552  
0.0000667808886986969  
0.0000648406754375351  
0.0000637649775961751  
0.0000605116624126968  
0.0000587142863014285  
0.0000517464477874719  
0.0000510778890305278  
0.0000502980739308251  
0.0000501704138447063  
0.0000486875444699859  
  0.000047654636101288  
0.0000472898159206083  
0.0000470646263209864  
0.0000466206204122978  
  0.000045970100127475  
0.0000456516005884856  
0.0000453374840706749  
0.0000451304635954664  
  0.000043636077383696  
0.0000423279294535637  
0.0000399336223329581  
0.0000377956846172357  
0.0000370865723354864  
  0.000028428297777777  
0.0000283467634629268  
0.0000283467634629268  
  0.000026426661837987  
0.0000216744989636121  
0.0000212093809601011  
0.0000212093809601011  
0.0000209397701851846  
0.0000204628810091245  
0.0000204206023293536  
0.0000194942239199352  
0.0000193416272551998  
  0.000018405161131112  
  9.72792473169994E-06  
  9.42189850086477E-06  
    0.018216226609859  
    0.0173359864930053  
    0.0133404159547744



0.00813502427662508  
0.00513143914996448  
0.00449899897272856  
0.00430366178497528  
0.00387094815459504  
0.00376419900054861  
0.00322279178453205  
0.00301073745357392  
0.00287428165770316  
0.00261422760295859  
0.00252509482681379  
0.00213902660949102  
0.00188762348203611  
0.00168587674153743  
0.00165562966118879  
0.00131539491931148  
0.00131395732923573  
0.00129555059940807  
0.00127978964321089  
0.00125157344433645  
0.00123000190836659  
0.00117535928166363  
0.00113997379665864  
0.00106332926555191  
0.0010436379828565  
0.00104165010098439  
0.00103468398681674  
0.00100126174748084  
0.000944163603230442  
0.000932181499250472  
0.000924137450468357  
0.000880569548035177  
0.000869356590827424  
0.000867439362374239  
0.000810250585846402  
0.000802227061555179  
0.000800122453523322  
0.000780290080640378  
0.000761779549530297  
0.000757097579502957  
0.00074167166294371  
0.000739492056424039  
0.000729816771228326  
0.000724946579311056  
0.000716557612144486  
0.000671766977470855

0.000664461553098952  
0.000637890914086375  
0.000636122199074442  
0.000635257902608308  
0.000632507868397882  
0.000621741777020897  
0.000607207553661967  
0.00060421146375903  
0.000592735568356636  
0.000584437270399643  
0.000574699309871269  
0.000572977716078082  
0.000566350590259111  
0.000553767092944269  
0.000529455366912569  
0.000525927802384381  
0.000517506437780086  
0.000502958064027232  
0.000498197555602283  
0.000479046942950527  
0.000477091649305831  
0.000470372048611383  
0.00046879994951843  
0.000468364363038042  
0.000464399973024419  
0.000451302911505516  
0.000418662874511385  
0.000412080233574243  
0.000411736628852978  
0.000408178411072767  
0.000406751213831253  
0.000388330412225677  
0.000382986415727158  
0.000379504721038729  
0.000363004515776176  
0.000363004515776176  
0.000346975744949695  
0.000345203332790998  
0.000339685167867642  
0.000333964154514082  
0.000327415837758904  
0.000317901750288956  
0.00030922606899452  
0.000305827980324251  
0.000305455019372636  
0.000304711819812118

0.000302817238549038  
0.000286254989583499  
0.000278303462095068  
0.000275003421042557  
0.000269325931059743  
0.000267755517467558  
0.000265050916281017  
0.000264803667291949  
0.000258886941483784  
0.000257887378003152  
0.000257688390828767  
0.000254103161043323  
0.000253003147359153  
0.000234772692101288  
0.00023191955174589  
0.000230374892504956  
0.000229791849436295  
0.000222642769676054  
0.000222373226371362  
0.000216859840593559  
0.000211988965267727  
0.000211906189412488  
0.000208727596571301  
0.000197779110118322  
0.000197222925894143  
0.000192671627604278  
0.000187319637948603  
0.000180716533827966  
0.000170389874752082  
0.000164514361829597  
0.000164244666154466  
0.000161335340344967  
0.000159486224696314  
0.00015903054976861  
0.000148033756433547  
0.000145623904584628  
0.000138001716741356  
0.000130710040905707  
0.000122780939159589  
0.000115959775872945  
0.000115425399025604  
0.0001126083372639  
0.000112391782769162  
0.000108712289880886  
0.000106222695456133  
0.000106222695456133

0.000105417978066313  
0.000104063614781473  
0.0000949661102883646  
0.0000888202538601282  
0.0000847624757649954  
0.0000826643946817035  
0.0000771279802572938  
0.0000759009442077459  
0.0000647217353709461  
0.0000642238758680927  
0.0000625987168723678  
0.0000571856428962469  
0.0000569904700535976  
0.0000525100871877487  
0.0000495986368090221  
0.000048353883375591  
0.0000478916091559391  
0.0000461276456511163  
0.0000423096479536421  
0.0000419552957932264  
0.0000411285904573992  
0.0000399478653724978  
0.0000399096742966159  
0.0000388330412225676  
0.000036861385707956  
0.0000358330637890646  
0.0000357563334597518  
0.0000350802683313111  
0.000034500429185339  
0.000034500429185339  
0.0000337337529812204  
0.0000335980034722416  
0.0000324552142384919  
0.000032235922250394  
0.0000319277394372927  
0.0000247747889105402  
0.0000238318854315472  
0.0000237866206918862  
0.0000210304883195265  
0.0000208207078874116  
0.0000179165318945323  
0.0000177640507720256  
0.000017285929322675  
0.0000169697232984797  
0.0000163868574344495  
0.0000163387551132134

0.0000162433927292841  
0.0000159182151817961  
0.000015812696709947  
8.12169636464207E-06  
8.03571112882777E-06  
8.00489344472871E-06  
7.77383972332593E-06  
0.0189471970864551  
0.0145816086482583  
0.0143903602499636  
0.0139832395337255  
0.00859764930746518  
0.00739498244572024  
0.00637122935308739  
0.00605244098980079  
0.00487418007503308  
0.00486247920499492  
0.00466107984457518  
0.00460090847378564  
0.00421716747842516  
0.00380236411989154  
0.00375983767907696  
0.00375160085051173  
0.00229409000734694  
0.00194093765617469  
0.00177206952616337  
0.00162100786163797  
0.00157050200706815  
0.00155924745071728  
0.001460175105251  
0.00144677217210744  
0.00140002094846159  
0.00135345020331608  
0.00134254145591944  
0.00134007680768641  
0.00133228348949153  
0.00130052451020512  
0.00130047491918472  
0.00129422148349977  
0.00126668562003668  
0.00115515747149435  
0.00115281530306066  
0.00112392826415461  
0.000983521660842629  
0.000960998264029439  
0.000941728376761108

0.000925309353643819  
0.000919992295064528  
0.000863251012031016  
0.000841190321494381  
0.000832335686531282  
0.000830711616899026  
0.000830579704070246  
0.000808752842079563  
0.000803440715735597  
0.000800322775510848  
0.000749398322748806  
0.00071713042519809  
0.000686676941388308  
0.000684432899096189  
0.000662583013620297  
0.000659284149270722  
0.000648732226267029  
0.000640424090413966  
0.000610379503456274  
0.000604182757228291  
0.000597832403627064  
0.000593424517249155  
0.000585402337074431  
0.000572230784490256  
0.000567501604453147  
0.000566391694852601  
0.000555818811703729  
0.000554410448641079  
0.000539951099211319  
0.000511291921726359  
0.000499936102937954  
0.000483575310836836  
0.000478422459163985  
0.000476597694479556  
0.000467127171012454  
0.000463729882496  
0.00044187705366043  
0.000440177526530966  
0.000435985359611624  
0.000423792905003391  
0.000420721101944696  
0.000416167843265641  
0.000413122712705161  
0.000383261548681846  
0.000381487189660171  
0.000381487189660171

0.000379626276539877  
0.000378334402968764  
0.000377987307186224  
0.000376135665957523  
0.000368995165817394  
0.000366227702073764  
0.000364146862857436  
0.000364021511097416  
0.000359046766738984  
0.000358344131187636  
0.000348314390559286  
0.000340821042539036  
0.000336606343817798  
0.000317080261535726  
0.000316927819102296  
0.000305189751728137  
0.000303997604260449  
0.000301421977015444  
0.00029855519190796  
0.000298305772365848  
0.000296712258624577  
0.000292202953782258  
0.000291317490285948  
0.000290302446765788  
0.00028836826934942  
0.000284026958725091  
0.000283897443468034  
0.000273544417190421  
0.000272910066449199  
0.000256288691123049  
0.00025432479310678  
0.000248060635641096  
0.000246499414857341  
0.000244151801382509  
0.000235225302715362  
0.000231734338704745  
0.000225139980783051  
0.00022384483228382  
0.000222534193968433  
0.000217992679805812  
0.000217992679805812  
0.000212100985757006  
0.000210475690846991  
0.000208281157577496  
0.000203459834485424  
0.000196006738740715

0.000185902386839474  
0.000174726957096261  
0.00017274891607253  
0.000167994358749433  
0.000156816868476908  
0.000153733643594397  
0.000152594875864068  
0.000146101476891129  
0.000145538465419487  
0.000144096856142825  
0.000141948721734017  
0.000134774669556095  
0.000133076926625641  
0.000126315453855128  
0.000124850352979692  
0.000117380673741591  
0.000108672908627229  
0.000105065324365424  
0.0000940653344367545  
0.0000885218893134099  
0.0000867016340136752  
0.0000843842631506369  
0.0000834503227381624  
0.0000805148842498853  
0.0000781202436164173  
0.0000773284843905752  
0.0000762974379320342  
0.0000751190991222731  
0.0000634343594815989  
0.0000582423190320872  
0.0000563774171911583  
0.0000543902527832323  
0.0000529741131254239  
0.0000472918003710956  
0.0000465938552256697  
0.0000453252106526936  
0.0000435985359611624  
0.0000429039013675918  
0.0000427836100553463  
0.0000427836100553463  
0.0000425846165202051  
0.0000419985896873583  
0.0000419985896873583  
0.0000419985896873583  
0.0000400394718010675  
0.0000384692964363197



0.0000383886480161178  
0.0000379117704010108  
0.0000369926971791681  
0.0000360460336686775  
0.0000348566975324014  
0.0000303839354596596  
0.0000301174097100135  
0.0000295344921027229  
0.0000294080060551738  
0.0000268758098390727  
0.0000257664893579102  
0.0000246120767522691  
0.0000236581202890028  
0.0000230621978635871  
0.000022832151002105  
0.0000219035706981916  
0.0000218826303820365  
0.0000196474089095367  
0.0000196474089095367  
0.0000191141806927851  
0.000018421916603308  
0.0000181660566504843  
0.0000175564574340251  
0.0000175061043056292  
0.0000130920293877656  
0.0000127872801003409  
0.0000124736955747194  
0.0000122402306842835  
0.0000119526012426163  
0.0000116188991774671  
0.0000115894842428406  
0.0000100391365700045  
9.74009845940862E-06  
9.43885830087021E-06  
9.30456560146759E-06  
8.90631571191061E-06  
8.75305215281463E-06  
8.69486472159934E-06  
4.40601181513191E-06  
4.35985359611624E-06

---

















































































Detected biocide/metal resistance genes (BMRGs) across all samples.

BAC0116|cutF/nlpE|sp|P40710|NLPE\_ECOLI Lipoprotein NlpE OS=Escherichia coli (strain K12) GN=nlpE PE=3 SV=1  
BAC0307|pcoE|sp|Q47459|PCOE\_ECOLX Probable copper-binding protein PcoE OS=Escherichia coli GN=pcoE PE=3 SV=1  
BAC0646|mdtB|tr|D0ZND9|D0ZND9\_SALT1 Multidrug resistance protein MdtB OS=Salmonella typhimurium (strain ATCC 14028) GN=mdtB PE=3 SV=1  
BAC0571|arsA|sp|O50593|ARSA\_ACIMA Arsenical pump-driving ATPase OS=Acidiphilium multivorum (strain ATCC 49619) GN=arsA PE=3 SV=1  
BAC0648|merA|sp|P08662|MERA\_SERMA Mercuric reductase (Fragments) OS=Serratia marcescens GN=merA PE=3 SV=1  
BAC0667|merD|sp|P08654|MERD\_SERMA HTH-type transcriptional regulator MerD OS=Serratia marcescens GN=merD PE=3 SV=1  
BAC0694|merT-P|tr|H6WCN3|H6WCN3\_9FLAO MerT-P OS=Tenacibaculum discolor GN=merT-P PE=4 SV=1  
BAC0594|arsR|sp|P37309|ARSR\_ECOLI Arsenical resistance operon repressor OS=Escherichia coli (strain K12) GN=arsR PE=3 SV=1  
BAC0063|chrA|sp|P14285|CHRA\_PSEAI Chromate transport protein OS=Pseudomonas aeruginosa GN=chrA PE=3 SV=1  
BAC0612|perO|tr|D5AQ60|D5AQ60\_RHO�CB Divalent ion symporter OS=Rhodobacter capsulatus (strain ATCC 49619) GN=perO PE=3 SV=1  
BAC0309|pcoS|sp|Q47457|PCOS\_ECOLX Probable sensor protein PcoS OS=Escherichia coli GN=pcoS PE=3 SV=1  
BAC0278|nirC|tr|Q6RUG1|Q6RUG1\_KLEOX NirC OS=Klebsiella oxytoca GN=nirC PE=4 SV=1  
BAC0583|arsC|sp|P52147|ARSC2\_ECOLX Arsenate reductase OS=Escherichia coli GN=arsC PE=3 SV=1  
BAC0182|golS|tr|Q8ZRG6|Q8ZRG6\_SALTY Putative transcriptional regulator OS=Salmonella typhimurium (strain ATCC 14028) GN=golS PE=3 SV=1  
BAC0613|cmeB|tr|Q8RTE4|Q8RTE4\_CAMJU CmeB OS=Campylobacter jejuni GN=cmeB PE=4 SV=1  
BAC0350|sitB|tr|Q9XCS1|Q9XCS1\_SALTM SitB OS=Salmonella typhimurium GN=sitB PE=3 SV=1  
BAC0275|nikR|sp|P0A6Z6|NIKR\_ECOLI Nickel-responsive regulator OS=Escherichia coli (strain K12) GN=nikR PE=3 SV=1  
BAC0102|cueA|tr|Q8KWW2|Q8KWW2\_PSEPU Copper transporter OS=Pseudomonas putida GN=cueA PE=3 SV=1  
BAC0168|fptA|sp|P42512|FPTA\_PSEAE Fe(3+)-pyochelin receptor OS=Pseudomonas aeruginosa (strain ATCC 27819) GN=fptA PE=3 SV=1  
BAC0098|ctpC|sp|P0A502|CTPC\_MYCTU Probable manganese/zinc-exporting P-type ATPase OS=Mycobacterium tuberculosis (strain H37Rv) GN=ctpC PE=3 SV=1  
BAC0672|merE|tr|Q79BE4|Q79BE4\_PSEST Urf1 OS=Pseudomonas stutzeri GN=merE PE=4 SV=1  
BAC0637|copS|tr|C6FFR5|C6FFR5\_PSEFL CopS OS=Pseudomonas fluorescens GN=copS PE=4 SV=1  
BAC0596|baeR|tr|D0ZNE3|D0ZNE3\_SALT1 DNA-binding transcriptional regulator BaeR OS=Salmonella typhimurium (strain ATCC 14028) GN=baeR PE=3 SV=1  
BAC0103|cueO|sp|P36649|CUEO\_ECOLI Blue copper oxidase CueO OS=Escherichia coli (strain K12) GN=cueO PE=3 SV=1  
BAC0255|mreA|tr|Q88IN0|Q88IN0\_PSEPK Putative uncharacterized protein OS=Pseudomonas putida (strain KT) GN=mreA PE=3 SV=1  
BAC0445|ygiW|sp|P0ADU5|YGIW\_ECOLI Protein YgiW OS=Escherichia coli (strain K12) GN=ygiW PE=1 SV=1  
BAC0652|merA|tr|O66017|O66017\_PSEST MerA OS=Pseudomonas stutzeri GN=merA PE=4 SV=1  
BAC0274|nikE|sp|P33594|NIKE\_ECOLI Nickel import ATP-binding protein NikE OS=Escherichia coli (strain K12) GN=nikE PE=3 SV=1  
BAC0654|merB1|sp|P16172|MERB\_BACCE Alkylmercury lyase OS=Bacillus cereus GN=merB1 PE=3 SV=2  
BAC0640|copD|tr|C6FFR7|C6FFR7\_PSEFL CopD OS=Pseudomonas fluorescens GN=copD PE=4 SV=1  
BAC0389|terD|sp|P18781|TERD\_ALCSP Tellurium resistance protein TerD OS=Alcaligenes sp. GN=terD PE=3 SV=1  
BAC0034|arsH|tr|E8PS81|E8PS81\_YERPE Arsenic resistance protein ArsH OS=Yersinia pestis Java 9 GN=arsH PE=3 SV=1  
BAC0131|cztB|tr|Q9RLI9|Q9RLI9\_PSEAI CztB protein OS=Pseudomonas aeruginosa GN=cztB PE=4 SV=1  
BAC0650|merA|tr|O08449|O08449\_9PSED Mercuric reductase OS=Pseudomonas sp. K-62 GN=merA PE=4 SV=1  
BAC0661|merB2|tr|Q7DJN2|Q7DJN2\_BACME MerB2 OS=Bacillus megaterium GN=merB2 PE=4 SV=1  
BAC0112|cusS|sp|P77485|CUSS\_ECOLI Sensor kinase CusS OS=Escherichia coli (strain K12) GN=cusS PE=1 SV=1  
BAC0639|copC|tr|C6FFR6|C6FFR6\_PSEFL CopC OS=Pseudomonas fluorescens GN=copC PE=4 SV=1  
BAC0293|ruvB|tr|B5L348|B5L348\_9PSED Malic enzyme family protein (Fragment) OS=Pseudomonas corrugata GN=ruvB PE=3 SV=1  
BAC0621|copA|tr|F4ZBX3|F4ZBX3\_XANCI CopA OS=Xanthomonas citri subsp. citri GN=copA PE=4 SV=1  
BAC0122|czcD|sp|P13512|CZCD\_RALME Cobalt-zinc-cadmium resistance protein CzcD OS=Ralstonia metallum GN=czcD PE=3 SV=1  
BAC0641|corA|sp|P0A2R8|CORA\_SALTY Magnesium transport protein CorA OS=Salmonella typhimurium (strain ATCC 14028) GN=corA PE=3 SV=1  
BAC0110|cusF/cusX|sp|P77214|CUSF\_ECOLI Cation efflux system protein CusF OS=Escherichia coli (strain K12) GN=cusF/cusX PE=3 SV=1  
BAC0169|fpvA|sp|P48632|FPVA\_PSEAE Ferripyoverdine receptor OS=Pseudomonas aeruginosa (strain ATCC 27819) GN=fpvA PE=3 SV=1

BAC0272|nikC|sp|P0AFA9|NIKC\_ECOLI Nickel transport system permease protein NikC OS=Escherichia coli (strain K12) GN=nikC PE=4 SV=1

BAC0228|merF|tr|Q2QCN0|Q2QCN0\_9PSED MerF OS=Pseudomonas sp. CT14 GN=merF PE=4 SV=1

BAC0312|pitA|sp|P0AFJ7|PITA\_ECOLI Low-affinity inorganic phosphate transporter 1 OS=Escherichia coli (strain K12) GN=pitA PE=4 SV=1

BAC0291|cnrR|cnrX|sp|P37975|CNRR\_RALME Nickel and cobalt resistance protein CnrR OS=Ralstonia metallidurans (strain ATCC 35061) GN=cnrR PE=4 SV=1

BAC0549|nccA|sp|Q44586|NCCA\_ALCXX Nickel-cobalt-cadmium resistance protein NccA OS=Alcaligenes xylosoxidans (strain ATCC 29619) GN=nccA PE=4 SV=1

BAC0229|merG|tr|O07302|O07302\_9PSED Mercuric resistance protein OS=Pseudomonas sp. K-62 GN=merG PE=4 SV=1

BAC0101|ctpV|sp|P77894|CTPV\_MYCTU Probable copper-exporting P-type ATPase V OS=Mycobacterium tuberculosis (strain H37Rv) GN=ctpV PE=4 SV=1

BAC0124|czcP|tr|Q1LAJ7|Q1LAJ7\_RALME CzcP cation efflux P1-ATPase OS=Ralstonia metallidurans (strain ATCC 35061) GN=czcP PE=4 SV=1

BAC0383|tcrB|tr|Q8VPE6|Q8VPE6\_ENTFC TcrB OS=Enterococcus faecium GN=tcrB PE=3 SV=1

BAC0078|copA|sp|O32220|COPA\_BACSU Copper-exporting P-type ATPase A OS=Bacillus subtilis (strain 168) GN=copA PE=4 SV=1

BAC0083|copR|sp|Q02540|COPR\_PSEUB Transcriptional activator protein CopR OS=Pseudomonas syringae pv. moulmerii GN=copR PE=4 SV=1

BAC0468|zraS|hydG|sp|P14377|ZRAS\_ECOLI Sensor protein ZraS OS=Escherichia coli (strain K12) GN=zraS PE=4 SV=1

BAC0570|actP|tr|D5AU53|D5AU53\_RHOBC Cation/acetate symporter ActP-1 OS=Rhodobacter capsulatus (strain ATCC 49619) GN=actP PE=4 SV=1

BAC0254|mrdH|tr|Q88IN1|Q88IN1\_PSEPK Membrane protein, putative OS=Pseudomonas putida (strain KT244) GN=mrdH PE=4 SV=1

BAC0252|mntP|yebN|sp|P76264|MNTP\_ECOLI Probable manganese efflux pump MntP OS=Escherichia coli (strain K12) GN=mntP PE=4 SV=1

BAC0134|dpr|dps|sp|P0CB53|DPS\_STRSU DNA protection during starvation protein OS=Streptococcus suis GN=dpr PE=4 SV=1

BAC0685|merR|tr|H6WCN2|H6WCN2\_9FLAO MerR OS=Tenacibaculum discolor GN=merR PE=4 SV=1

BAC0012|actP|sp|Q9X5X3|ATCU\_SINMW Copper-transporting P-type ATPase OS=Sinorhizobium medicae (strain ATCC 35061) GN=actP PE=4 SV=1

BAC0345|silF|tr|Q9ZHD1|Q9ZHD1\_SALTM Uncharacterized protein OS=Salmonella typhimurium GN=ORF96 PE=4 SV=1

BAC0113|cutA|sp|P69488|CUTA\_ECOLI Divalent-cation tolerance protein CutA OS=Escherichia coli (strain K12) GN=cutA PE=4 SV=1

BAC0233|merT|sp|P94185|MERT\_ALCSP Mercuric transport protein OS=Alcaligenes sp. GN=merT PE=3 SV=1

BAC0088|corC|sp|P0A2L3|CORC\_SALTY Magnesium and cobalt efflux protein CorC OS=Salmonella typhimurium GN=corC PE=4 SV=1

BAC0591|arsR|sp|P52144|ARSR2\_ECOLX Arsenical resistance operon repressor OS=Escherichia coli GN=arsR PE=4 SV=1

BAC0540|nfsA|sp|P17117|NFSA\_ECOLI Oxygen-insensitive NADPH nitroreductase OS=Escherichia coli (strain K12) GN=nfsA PE=4 SV=1

BAC0611|modC|sp|P09833|MODC\_ECOLI Molybdenum import ATP-binding protein ModC OS=Escherichia coli (strain K12) GN=modC PE=4 SV=1

BAC0464|znuB|yebI|sp|P39832|ZNUB\_ECOLI High-affinity zinc uptake system membrane protein ZnuB OS=Escherichia coli (strain K12) GN=znuB PE=4 SV=1

BAC0040|baeS|sp|P30847|BAES\_ECOLI Signal transduction histidine-protein kinase BaeS OS=Escherichia coli (strain K12) GN=baeS PE=4 SV=1

BAC0270|nikA|sp|P33590|NIKA\_ECOLI Nickel-binding periplasmic protein OS=Escherichia coli (strain K12) GN=nikA PE=4 SV=1

BAC0086|corA|sp|P0ABI4|CORA\_ECOLI Magnesium transport protein CorA OS=Escherichia coli (strain K12) GN=corA PE=4 SV=1

BAC0356|recG|tr|Q9HTL3|Q9HTL3\_PSEAE ATP-dependent DNA helicase RecG OS=Pseudomonas aeruginosa GN=recG PE=4 SV=1

BAC0181|glpF|sp|P0AER0|GLPF\_ECOLI Glycerol uptake facilitator protein OS=Escherichia coli (strain K12) GN=glpF PE=4 SV=1

BAC0092|corT|coaT|tr|H0P0Y3|H0P0Y3\_9SYNC Cation-transporting ATPase E1-E2 ATPase OS=Synechocystis sp. PCC 6803 GN=corT PE=4 SV=1

BAC0125|czcR|sp|Q44006|CZCR\_RALME Transcriptional activator protein CzcR OS=Ralstonia metallidurans (strain ATCC 35061) GN=czcR PE=4 SV=1

BAC0114|cutC|sp|P67826|CUTC\_ECOLI Copper homeostasis protein CutC OS=Escherichia coli (strain K12) GN=cutC PE=4 SV=1

BAC0447|yjaA|sp|P09162|YJAA\_ECOLI Uncharacterized protein YjaA OS=Escherichia coli (strain K12) GN=yjaA PE=4 SV=1

BAC0629|copB|sp|O30085|COPB\_ARCFU Copper-exporting P-type ATPase B OS=Archaeoglobus fulgidus (strain ATCC 49619) GN=copB PE=4 SV=1

BAC0190|hmrR|sp|Q9X5X4|HMRR\_SINMW HTH-type transcriptional regulator HmrR OS=Sinorhizobium medicae GN=hmrR PE=4 SV=1

BAC0433|ybtQ|tr|Q9Z375|Q9Z375\_YERPE Inner membrane ABC-transporter YbtQ OS=Yersinia pestis GN=ybtQ PE=4 SV=1

BAC0123|czcE|tr|Q1LAJ1|Q1LAJ1\_RALME CzcE, involved in Cd(II), Zn(II), Co(II) resistance OS=Ralstonia metallidurans (strain ATCC 35061) GN=czcE PE=4 SV=1

BAC0066|chrF|tr|Q5NUZ7|Q5NUZ7\_RALME ChrF, regulatory protein, involved in Chromate resistance OS=Ralstonia metallidurans (strain ATCC 35061) GN=chrF PE=4 SV=1

BAC0082|copL|tr|Q5YKV8|Q5YKV8\_9XANT CopL OS=Xanthomonas perforans GN=copL PE=4 SV=1

BAC0023|aioS|aoxS|tr|Q2VGB2|Q2VGB2\_RHIRD Putative sensor histidine kinase OS=Rhizobium radiobacter GN=aioS PE=4 SV=1

BAC0673|merE|sp|P06690|MERE\_PSEAI Uncharacterized mercuric resistance protein MerE OS=Pseudomonas aeruginosa GN=merE PE=4 SV=1

BAC0688|merR2|tr|Q79B70|Q79B70\_PSEST Organomercurial resistance regulatory protein OS=Pseudomonas aeruginosa GN=merR2 PE=4 SV=1

BAC0687|merR|tr|Q79BG7|Q79BG7\_PSEST MerR OS=Pseudomonas stutzeri GN=merR PE=4 SV=1

BAC0565|actR|sp|A6UEL7|ACTR\_SINMW Acid tolerance regulatory protein ActR OS=Sinorhizobium medicae GN=actR PE=4 SV=1

BAC0659|merB|sp|P08664|MERB\_SERMA Alkylmercury lyase OS=Serratia marcescens GN=merB PE=3 SV=1  
BAC0100|ctpG|sp|P63689|CTPG\_MYCTU Probable cation-transporting ATPase G OS=Mycobacterium tubercul  
BAC0120|czcB|sp|P13510|CZCB\_RALME Cobalt-zinc-cadmium resistance protein CzcB OS=Ralstonia metallid  
BAC0704|ncrC|tr|Q8VTR4|Q8VTR4\_HAFAL NcrC OS=Hafnia alvei GN=ncrC PE=4 SV=1  
BAC0035|arsM|tr|Q6N3Y0|Q6N3Y0\_RHOPA UbiE/COQ5 methyltransferase OS=Rhodopseudomonas palustris  
BAC0231|merP|sp|P13113|MERP\_SERMA Mercuric transport protein periplasmic component OS=Serratia marc  
BAC0265|ncrC|tr|D5CKG5|D5CKG5\_ENTCC Nickel-resistant membrane protein-like protein NcrC OS=Enterob  
BAC0631|copC|tr|F4ZBX9|F4ZBX9\_XANCI CopC OS=Xanthomonas citri subsp. citri GN=copC PE=4 SV=1  
BAC0346|silP|sp|Q9ZHC7|SILP\_SALTM Silver exporting P-type ATPase OS=Salmonella typhimurium GN=silP  
BAC0111|cusR|ylcA|sp|P0ACZ8|CUSR\_ECOLI Transcriptional regulatory protein CusR OS=Escherichia coli (st  
BAC0568|actP|sp|Q9X5V3|ATCU\_RHILV Copper-transporting P-type ATPase OS=Rhizobium leguminosarum 1  
BAC0455|ziaA|sp|Q59998|ATZN\_SYNY3 Zinc-transporting ATPase OS=Synechocystis sp. (strain PCC 6803 / F  
BAC0485|pmrC|tr|Q70FH1|Q70FH1\_PECCC Putative cytoplasmic membrane protein pmrC OS=Pectobacterium  
BAC0644|corD|sp|Q56017|APAG\_SALTY Protein ApaG OS=Salmonella typhimurium (strain LT2 / SGSC1412  
BAC0627|copB|tr|F4ZD00|F4ZD00\_9XANT Copper resistance protein B OS=Xanthomonas alfalfae subsp. citru  
BAC0003|acn|tr|O53166|O53166\_MYCTU Aconitate hydratase OS=Mycobacterium tuberculosis H37Rv GN=R  
BAC0318|pstS|sp|P0AG82|PSTS\_ECOLI Phosphate-binding protein PstS OS=Escherichia coli (strain K12) GN=  
BAC0461|zntA|yhhO|sp|P37617|ATZN\_ECOLI Lead, cadmium, zinc and mercury-transporting ATPase OS=Esc  
BAC0108|cusB|sp|P77239|CUSB\_ECOLI Cation efflux system protein CusB OS=Escherichia coli (strain K12) G  
BAC0029|chrF|tr|A4UQR2|A4UQR2\_9RHIZ ChrF OS=Ochrobactrum tritici GN=chrF PE=4 SV=1  
BAC0022|aioR|aoxR|tr|Q2VGB1|Q2VGB1\_RHIRD Putative transcriptional regulator OS=Rhizobium radiobacte  
BAC0351|sitC|tr|Q9XCS0|Q9XCS0\_SALTM SitC OS=Salmonella typhimurium GN=sitC PE=3 SV=1  
BAC0020|aioA|aoxB|sp|Q8GGJ6|AIOA\_HERAR Arsenite oxidase subunit AioA OS=Herminiimonas arsenicoxy  
BAC0638|copR|tr|C6FFR4|C6FFR4\_PSEFL CopR OS=Pseudomonas fluorescens GN=copR PE=4 SV=1  
BAC0386|terA|sp|P18778|TERA\_ALCSP Tellurium resistance protein TerA OS=Alcaligenes sp. GN=terA PE=4  
BAC0578|arsB|tr|O50594|O50594\_ACIMU ArsB OS=Acidiphilium multivorum GN=arsB PE=4 SV=1  
BAC0388|terC|sp|P18780|TERC\_ALCSP Tellurium resistance protein TerC OS=Alcaligenes sp. GN=terC PE=3  
BAC0434|ychH|sp|P0AB49|YCHH\_ECOLI Uncharacterized protein YchH OS=Escherichia coli (strain K12) GN  
BAC0263|ncrA|tr|Q06VT3|Q06VT3\_9BACT NcrA OS=Leptospirillum ferriphilum GN=ncrA PE=4 SV=1  
BAC0109|cusC|ylcB|sp|P77211|CUSC\_ECOLI Cation efflux system protein CusC OS=Escherichia coli (strain K  
BAC0633|copD|tr|Q7WYG8|Q7WYG8\_PSEPU CopD OS=Pseudomonas putida GN=copD PE=4 SV=1  
BAC0563|acrD|tr|Q8ZN77|Q8ZN77\_SALTY RND family aminoglycoside/multidrug efflux pump OS=Salmonell  
BAC0681|merR2|tr|Q9WWL1|Q9WWL1\_BACSR Mercury resistance operon negative regulator MerR2 OS=Bac  
BAC0601|tunR|tr|Q72FN4|Q72FN4\_DESVH Molybdenum-pterin binding domain protein/site-specific recombin  
BAC0582|arsC|sp|P08692|ARSC1\_ECOLX Arsenate reductase OS=Escherichia coli GN=arsC PE=1 SV=1  
BAC0161|fbpB|sp|P71338|FBPB2\_HAEIN Fe(3+)-transport system permease protein FbpB 2 OS=Haemophilus  
BAC0253|mntR|sp|P0A9F1|MNTR\_ECOLI Transcriptional regulator MntR OS=Escherichia coli (strain K12) GN  
BAC0348|silS|sp|Q9ZHD4|SILS\_SALTM Probable sensor kinase SilS OS=Salmonella typhimurium GN=silS PE  
BAC0470|zur|yjbK|sp|P0AC51|ZUR\_ECOLI Zinc uptake regulation protein OS=Escherichia coli (strain K12) GN  
BAC0651|merA|sp|P0A0E5|MERA\_STAAU Mercuric reductase OS=Staphylococcus aureus GN=merA PE=3 SV  
BAC0179|gesB|tr|Q8ZRG9|Q8ZRG9\_SALTY Putative cation efflux system protein OS=Salmonella typhimurium  
BAC0285|nreB|tr|F0KND8|F0KND8\_ACICP NrsD, nreB nickel permease involved in nickel and cobalt toleranc  
BAC0031|arsB|sp|P08691|ARSB1\_ECOLX Arsenical pump membrane protein OS=Escherichia coli GN=arsB PE  
BAC0352|sitD|tr|Q9XCR9|Q9XCR9\_SALTM SitD OS=Salmonella typhimurium GN=sitD PE=3 SV=1  
BAC0138|dsbC|sp|P0AEG6|DSBC\_ECOLI Thiol:disulfide interchange protein DsbC OS=Escherichia coli (strain  
BAC0597|baeS|tr|D0ZNE2|D0ZNE2\_SALT1 Signal transduction histidine-protein kinase BaeS OS=Salmonella t



BAC0299|pbrB|pbrC|tr|Q58AJ7|Q58AJ7\_RALME Lipoprotein signal peptidase OS=Ralstonia metallidurans (strain CH34 / ATCC 49619) GN=pbrB PE=4 SV=1

BAC0137|dsbB|sp|P0A6M2|DSBB\_ECOLI Disulfide bond formation protein B OS=Escherichia coli (strain K12) GN=dsbB PE=4 SV=1

BAC0115|cutE|Int|sp|P23930|LNT\_ECOLI Apolipoprotein N-acyltransferase OS=Escherichia coli (strain K12) GN=cutE PE=4 SV=1

BAC0030|arsA|sp|P52145|ARSA2\_ECOLX Arsenical pump-driving ATPase OS=Escherichia coli GN=arsA PE=4 SV=1

BAC0266|ncrY|tr|Q06VT0|Q06VT0\_9BACT NcrY OS=Leptospirillum ferriphilum GN=ncrY PE=4 SV=1

BAC0308|pcoR|sp|Q47456|PCOR\_ECOLX Transcriptional regulatory protein PcoR OS=Escherichia coli GN=pcoR PE=4 SV=1

BAC0121|czcC|sp|P13509|CZCC\_RALME Cobalt-zinc-cadmium resistance protein CzcC OS=Ralstonia metallidurans (strain CH34 / ATCC 49619) GN=czcC PE=4 SV=1

BAC0498|ideR|sp|P0A672|IDER\_MYCTU Iron-dependent repressor IdeR OS=Mycobacterium tuberculosis GN=ideR PE=4 SV=1

BAC0347|silR|sp|Q9ZHD3|SILR\_SALTM Probable transcriptional regulatory protein SilR OS=Salmonella typhimurium GN=silR PE=4 SV=1

BAC0105|cueR|ybbI|sp|P0A9G4|CUER\_ECOLI HTH-type transcriptional regulator CueR OS=Escherichia coli (strain K12) GN=cueR PE=4 SV=1

BAC0315|pstA|sp|P07654|PSTA\_ECOLI Phosphate transport system permease protein PstA OS=Escherichia coli (strain K12) GN=pstA PE=4 SV=1

BAC0357|recG|tr|B5L350|B5L350\_9PSED ATP-dependent DNA helicase (Fragment) OS=Pseudomonas corrugata GN=recG PE=4 SV=1

BAC0084|copY|tr|Y|sp|Q47839|COPY\_ENTHA Transcriptional repressor CopY OS=Enterococcus hirae (strain ATCC 29512) GN=copY PE=4 SV=1

BAC0584|arsC|sp|O50595|ARSC\_ACIMA Arsenate reductase OS=Acidiphilium multivorum (strain DSM 11245) GN=arsC PE=4 SV=1

BAC0224|merA|sp|P16171|MERA\_BACCE Mercuric reductase OS=Bacillus cereus GN=merA PE=1 SV=1

BAC0269|nia|tr|Q92Z60|Q92Z60\_RHIME Cation transport P-type ATPase OS=Rhizobium meliloti (strain 1021) GN=nia PE=4 SV=1

BAC0657|merB|tr|O07303|O07303\_9PSED Alkylmercury lyase OS=Pseudomonas sp. K-62 GN=merB PE=3 SV=1

BAC0643|corB|tr|Q9X621|Q9X621\_SALTM CorB OS=Salmonella typhimurium GN=corB PE=4 SV=1

BAC0024|aioX|aoxX|tr|G8XNW6|G8XNW6\_RHIRD AioX (Fragment) OS=Rhizobium radiobacter GN=aioX PE=4 SV=1

BAC0341|silA|sp|Q9ZHC9|SILA\_SALTM Putative cation efflux system protein SilA OS=Salmonella typhimurium GN=silA PE=4 SV=1

BAC0334|robA|sp|P0ACI0|ROB\_ECOLI Right origin-binding protein OS=Escherichia coli (strain K12) GN=robA PE=4 SV=1

BAC0076|comR|ycfQ|sp|P75952|COMR\_ECOLI HTH-type transcriptional repressor ComR OS=Escherichia coli (strain K12) GN=comR PE=4 SV=1

BAC0387|terB|sp|P18779|TERB\_ALCSP Tellurium resistance protein TerB OS=Alcaligenes sp. GN=terB PE=4 SV=1

BAC0371|soxS|sp|P0A9E2|SOXS\_ECOLI Regulatory protein SoxS OS=Escherichia coli (strain K12) GN=soxS PE=4 SV=1

BAC0619|copA|tr|Q7WYH1|Q7WYH1\_PSEPU CopA OS=Pseudomonas putida GN=copA PE=4 SV=1

BAC0057|cadD|tr|Q7A320|Q7A320\_STAAN CadD OS=Staphylococcus aureus (strain N315) GN=cadD PE=4 SV=1

BAC0048|bfrA|sp|P63697|BFR\_MYCTU Bacterioferritin OS=Mycobacterium tuberculosis GN=bfrA PE=1 SV=1

BAC0698|ncrA|tr|Q1KLR2|Q1KLR2\_SERMA NcrA OS=Serratia marcescens GN=ncrA PE=4 SV=1

BAC0467|zraR|hydH|sp|P14375|ZRAR\_ECOLI Transcriptional regulatory protein ZraR OS=Escherichia coli (strain K12) GN=zraR PE=4 SV=1

BAC0107|cusA|ybdE|sp|P38054|CUSA\_ECOLI Cation efflux system protein CusA OS=Escherichia coli (strain K12) GN=cusA PE=4 SV=1

BAC0026|chrA|tr|A4UQR4|A4UQR4\_9RHIZ Chromate transporter OS=Ochrobactrum tritici GN=chrA PE=4 SV=1

BAC0689|merR|tr|Q934S8|Q934S8\_THIFE Mer operon regulatory protein OS=Thiobacillus ferrooxidans GN=merR PE=4 SV=1

BAC0649|merA|tr|E3VST6|E3VST6\_9FLAO MerA OS=Tenacibaculum discolor GN=merA PE=3 SV=1

BAC0385|tehB|sp|P25397|TEHB\_ECOLI Tellurite methyltransferase OS=Escherichia coli (strain K12) GN=tehB PE=4 SV=1

BAC0081|copK|sp|Q58AD3|COPK\_RALME Copper resistance protein K OS=Ralstonia metallidurans (strain CH34 / ATCC 49619) GN=copK PE=4 SV=1

BAC0692|merT|tr|Q79BG6|Q79BG6\_PSEST MerT OS=Pseudomonas stutzeri GN=merT PE=4 SV=1

BAC0572|arsA|sp|P08690|ARSA1\_ECOLX Arsenical pump-driving ATPase OS=Escherichia coli GN=arsA PE=4 SV=1

BAC0028|chrC|tr|A4UQR3|A4UQR3\_9RHIZ Superoxide dismutase OS=Ochrobactrum tritici GN=chrC PE=3 SV=1

BAC0126|czcS|sp|Q44007|CZCS\_RALME Sensor protein CzcS OS=Ralstonia metallidurans (strain CH34 / ATCC 49619) GN=czcS PE=4 SV=1

BAC0488|pmrB|sp|Q70FG9|PMRB\_PECSS Sensor histidine kinase PmrB OS=Pectobacterium sp. (strain SCC31) GN=pmrB PE=4 SV=1

BAC0656|merB3|tr|Q7DHE7|Q7DHE7\_BACCE Organomercurial lyase enzyme OS=Bacillus cereus GN=merB3 PE=4 SV=1

BAC0645|mdtA|tr|D0ZND8|D0ZND8\_SALT1 Multidrug resistance protein MdtA OS=Salmonella typhimurium GN=mdtA PE=4 SV=1

BAC0441|yfeC|sp|Q56954|YFEC\_YERPE Chelated iron transport system membrane protein YfeC OS=Yersinia enterocolitica GN=yfeC PE=4 SV=1

BAC0690|merT|tr|Q934S7|Q934S7\_THIFE Mercuric ion transport protein OS=Thiobacillus ferrooxidans GN=merT PE=4 SV=1

BAC0463|znuA|yebL|sp|P39172|ZNUA\_ECOLI High-affinity zinc uptake system protein ZnuA OS=Escherichia coli (strain K12) GN=znuA PE=4 SV=1

BAC0183|golT|tr|Q8ZRG7|Q8ZRG7\_SALTY Putative cation transport ATPase OS=Salmonella typhimurium (strain ATCC 14028) GN=golT PE=4 SV=1

BAC0585|arsC|sp|P74984|ARSC\_YEREN Arsenate reductase OS=Yersinia enterocolitica GN=arsC PE=3 SV=1  
BAC0301|pbrR|tr|D8IQ72|D8IQ72\_HERSS Pb-specific transcription regulator protein OS=Herbaspirillum seropenae GN=pbrR PE=4 SV=1  
BAC0251|mntH|yfeP|sp|P0A769|MNTH\_ECOLI Divalent metal cation transporter MntH OS=Escherichia coli (strain K12) GN=yfeP PE=4 SV=1  
BAC0119|czcA|sp|P13511|CZCA\_RALME Cobalt-zinc-cadmium resistance protein CzcA OS=Ralstonia metallidurans (strain CH34 / ATCC 49619) GN=czcA PE=4 SV=1  
BAC0691|merT|tr|Q52397|Q52397\_PSEST Mercury transport protein OS=Pseudomonas stutzeri GN=merT PE=4 SV=1  
BAC0264|ncrB|tr|Q06VT2|Q06VT2\_9BACT NcrB OS=Leptospirillum ferriphilum GN=ncrB PE=4 SV=1  
BAC0064|chrB1|sp|P17552|CHRB1\_RALME Protein ChrB OS=Ralstonia metallidurans (strain CH34 / ATCC 49619) GN=chrB1 PE=4 SV=1  
BAC0587|arsD|sp|P52148|ARSD2\_ECOLX Arsenical resistance operon trans-acting repressor ArsD OS=Escherichia coli (strain K12) GN=arsD PE=4 SV=1  
BAC0642|mgtA|sp|P36640|ATMA\_SALTY Magnesium-transporting ATPase, P-type 1 OS=Salmonella typhimurium (strain LT2) GN=mgtA PE=4 SV=1  
BAC0302|pbrT|tr|Q5GR69|Q5GR69\_ALCXX Lead uptake protein PbrT OS=Alcaligenes xylosoxydans xylosoxydans OS=Alcaligenes xylosoxydans GN=pbrT PE=4 SV=1  
BAC0675|merP|tr|O07301|O07301\_9PSED Mercuric transport protein periplasmic component OS=Pseudomonas stutzeri GN=merP PE=4 SV=1  
BAC0106|cuiD|sp|Q8ZRS2|CUEO\_SALTY Blue copper oxidase CueO OS=Salmonella typhimurium (strain LT2) GN=cuiD PE=4 SV=1  
BAC0647|mdtC|tr|D0ZNE0|D0ZNE0\_SALT1 Multidrug resistance protein MdtC OS=Salmonella typhimurium (strain LT2) GN=mdtC PE=4 SV=1  
BAC0072|cnrC|sp|P37974|CNRC\_RALME Nickel and cobalt resistance protein CnrC OS=Ralstonia metallidurans (strain CH34 / ATCC 49619) GN=cnrC PE=4 SV=1  
BAC0451|yodD|sp|P64519|YODD\_ECOLI Uncharacterized protein YodD OS=Escherichia coli (strain K12) GN=yodD PE=4 SV=1  
BAC0541|yieF|sp|P0AGE6|YIEF\_ECOLI Uncharacterized protein YieF OS=Escherichia coli (strain K12) GN=yieF PE=4 SV=1  
BAC0039|baeR|sp|P69228|BAER\_ECOLI Transcriptional regulatory protein BaeR OS=Escherichia coli (strain K12) GN=baeR PE=4 SV=1  
BAC0462|zntR|yhdM|sp|P0ACS5|ZNTR\_ECOLI HTH-type transcriptional regulator ZntR OS=Escherichia coli (strain K12) GN=yhdM PE=4 SV=1  
BAC0610|modB|sp|P0AF01|MODB\_ECOLI Molybdenum transport system permease protein ModB OS=Escherichia coli (strain K12) GN=modB PE=4 SV=1  
BAC0490|G2alt|tr|B0FSM1|B0FSM1\_9BACI 7-cyano-7-deazaguanine synthase OS=Anoxybacillus gonensis GN=G2alt PE=4 SV=1  
BAC0678|merP|tr|O66016|O66016\_PSEST MerP OS=Pseudomonas stutzeri GN=merP PE=4 SV=1  
BAC0342|silB|sp|Q9ZHD0|SILB\_SALTM Putative membrane fusion protein SilB OS=Salmonella typhimurium (strain LT2) GN=silB PE=4 SV=1  
BAC0163|fecD|sp|P15029|FECD\_ECOLI Fe(3+) dicitrate transport system permease protein FecD OS=Escherichia coli (strain K12) GN=fecD PE=4 SV=1  
BAC0390|terE|sp|P18782|TERE\_ALCSP Tellurium resistance protein TerE OS=Alcaligenes sp. GN=terE PE=3 SV=1  
BAC0682|merR1|sp|P22853|MERR\_BACCE Mercuric resistance operon regulatory protein OS=Bacillus cereus GN=merR1 PE=4 SV=1  
BAC0609|modA|sp|P37329|MODA\_ECOLI Molybdate-binding periplasmic protein OS=Escherichia coli (strain K12) GN=modA PE=4 SV=1  
BAC0577|arsB|sp|P74985|ARSB\_YEREN Arsenical pump membrane protein OS=Yersinia enterocolitica GN=arsB PE=4 SV=1  
BAC0599|modB|tr|Q72FN2|Q72FN2\_DESVH Molybdenum ABC transporter, permease protein OS=Desulfovibrio desulfurans (strain ATCC 35061) GN=modB PE=4 SV=1  
BAC0162|fbpC|sp|P44513|FBPC2\_HAEIN Fe(3+) ions import ATP-binding protein FbpC 2 OS=Haemophilus influenzae (strain ATCC 49619) GN=fbpC PE=4 SV=1  
BAC0579|arsB|sp|P74311|Y944\_SYNY3 Uncharacterized transporter slr0944 OS=Synechocystis sp. (strain PCC 6803) GN=arsB PE=4 SV=1  
BAC0548|chrA1|sp|P17551|CHRA1\_RALME Chromate transport protein OS=Ralstonia metallidurans (strain CH34 / ATCC 49619) GN=chrA1 PE=4 SV=1  
BAC0459|zitB|ybgR|sp|P75757|ZITB\_ECOLI Zinc transporter ZitB OS=Escherichia coli (strain K12) GN=ybgR PE=4 SV=1  
BAC0676|merP|tr|Q7DHE4|Q7DHE4\_BACCE Mercury-binding protein OS=Bacillus cereus GN=merP PE=4 SV=1  
BAC0027|chrB|tr|A4UQR5|A4UQR5\_9RHIZ ChrB OS=Ochrobactrum tritici GN=chrB PE=4 SV=1  
BAC0628|copB|tr|F4ZBX4|F4ZBX4\_XANCI CopB OS=Xanthomonas citri subsp. citri GN=copB PE=4 SV=1  
BAC0679|merP|tr|O66047|O66047\_PSEST Mercury transport protein OS=Pseudomonas stutzeri GN=merP PE=4 SV=1  
BAC0164|fecE|sp|P15031|FECE\_ECOLI Fe(3+) dicitrate transport ATP-binding protein FecE OS=Escherichia coli (strain K12) GN=fecE PE=4 SV=1  
BAC0695|merT|sp|P13112|MERT\_SERMA Mercuric transport protein OS=Serratia marcescens GN=merT PE=4 SV=1  
BAC0355|ruvB|sp|Q51426|RUVB\_PSEAE Holliday junction ATP-dependent DNA helicase RuvB OS=Pseudomonas aeruginosa GN=ruvB PE=4 SV=1  
BAC0332|rcnR|yohL|sp|P64530|RCNR\_ECOLI Transcriptional repressor RcnR OS=Escherichia coli (strain K12) GN=yohL PE=4 SV=1  
BAC0165|fetA|ybbL|sp|P77279|YBBL\_ECOLI Uncharacterized ABC transporter ATP-binding protein YbbL OS=Escherichia coli (strain K12) GN=ybbL PE=4 SV=1  
BAC0073|cnrH|sp|P37978|CNRH\_RALME RNA polymerase sigma factor CnrH OS=Ralstonia metallidurans (strain CH34 / ATCC 49619) GN=cnrH PE=4 SV=1  
BAC0666|merD|tr|O66018|O66018\_PSEST MerD OS=Pseudomonas stutzeri GN=merD PE=4 SV=1  
BAC0033|arsD|sp|P46003|ARSD1\_ECOLX Arsenical resistance operon trans-acting repressor ArsD OS=Escherichia coli (strain K12) GN=arsD PE=4 SV=1  
BAC0358|oscA|tr|B6CM35|B6CM35\_9PSED Putative uncharacterized protein oscA OS=Pseudomonas corrugata GN=oscA PE=4 SV=1  
BAC0686|merR|sp|P13111|MERR\_SERMA Mercuric resistance operon regulatory protein OS=Serratia marcescens GN=merR PE=4 SV=1

BAC0305|pcoC|sp|Q47454|PCOC\_ECOLX Copper resistance protein C OS=Escherichia coli GN=pcoC PE=1 SV=1  
BAC0049|bhsA|ycfR|comC|sp|P0AB40|BHSA\_ECOLI Multiple stress resistance protein BhsA OS=Escherichia coli GN=bhsA PE=4 SV=1  
BAC0276|nirA|tr|Q6RUG3|Q6RUG3\_KLEOX NirA OS=Klebsiella oxytoca GN=nirA PE=4 SV=1  
BAC0130|cztA|tr|Q9RLI8|Q9RLI8\_PSEAI CztA protein OS=Pseudomonas aeruginosa GN=cztA PE=4 SV=1  
BAC0306|pcoD|sp|Q47455|PCOD\_ECOLX Copper resistance protein D OS=Escherichia coli GN=pcoD PE=3 SV=1  
BAC0625|copA|tr|F4ZCZ9|F4ZCZ9\_9XANT Copper resistance protein A OS=Xanthomonas alfalfae subsp. citri GN=copA PE=4 SV=1  
BAC0566|actS|tr|Q52912|Q52912\_9RHIZ Histidine protein kinase OS=Sinorhizobium medicae GN=actS PE=4 SV=1  
BAC0298|pbrA|tr|Q58AJ6|Q58AJ6\_RALME P-type ATPase involved in Pb(II) resistance PbrA OS=Ralstonia solanaceae GN=pbrA PE=4 SV=1  
BAC0166|fetB|ybbM|sp|P77307|YBBM\_ECOLI UPF0014 inner membrane protein YbbM OS=Escherichia coli GN=fetB PE=4 SV=1  
BAC0683|merR1|tr|O07300|O07300\_9PSED Mercuric resistance operon regulatory protein OS=Pseudomonas sp. GN=merR1 PE=4 SV=1  
BAC0330|rcnA|yohM|sp|P76425|RCNA\_ECOLI Nickel/cobalt efflux system RcnA OS=Escherichia coli (strain K12) GN=rcnA PE=4 SV=1  
BAC0707|sodB|sp|P0AGD3|SODF\_ECOLI Superoxide dismutase [Fe] OS=Escherichia coli (strain K12) GN=sodB PE=4 SV=1  
BAC0059|cadX|tr|A7LHQ4|A7LHQ4\_STRSL CadX OS=Streptococcus salivarius GN=cadX PE=4 SV=1  
BAC0058|cadR|tr|Q93TP7|Q93TP7\_PSEPU CadR OS=Pseudomonas putida GN=cadR PE=4 SV=1  
BAC0317|pstC|sp|P0AGH8|PSTC\_ECOLI Phosphate transport system permease protein PstC OS=Escherichia coli (strain K12) GN=pstC PE=4 SV=1  
BAC0466|zraP|sp|Q9L9I0|ZRAP\_SALTY Zinc resistance-associated protein OS=Salmonella typhimurium (strain ATCC 14028) GN=zraP PE=4 SV=1  
BAC0331|rcnB|yohN|sp|P64534|RCNB\_ECOLI Nickel/cobalt homeostasis protein RcnB OS=Escherichia coli (strain K12) GN=rcnB PE=4 SV=1  
BAC0273|nikD|sp|P33593|NIKD\_ECOLI Nickel import ATP-binding protein NikD OS=Escherichia coli (strain K12) GN=nikD PE=4 SV=1  
BAC0079|copB|sp|P05425|COPB\_ENTHA Copper-exporting P-type ATPase B OS=Enterococcus hirae (strain ATCC 29512) GN=copB PE=4 SV=1  
BAC0344|sileE|sp|Q9Z4N3|SILE\_SALTM Silver-binding protein Sile OS=Salmonella typhimurium GN=sile PE=4 SV=1  
BAC0668|merD|tr|Q5NUV1|Q5NUV1\_RALME MerD from Tn4378, regulatory protein involved in Hg(II) resistance OS=Ralstonia solanaceae GN=merD PE=4 SV=1  
BAC0432|ybtP|tr|Q9R7V3|Q9R7V3\_YERPE Lipoprotein inner membrane ABC-transporter OS=Yersinia pestis (strain ATCC 49619) GN=ybtP PE=4 SV=1  
BAC0469|zupT|ygiE|sp|P0A8H3|ZUPT\_ECOLI Zinc transporter ZupT OS=Escherichia coli (strain K12) GN=zupT PE=4 SV=1  
BAC0665|merD|tr|O66022|O66022\_PSEST Mercury operon coregulator protein OS=Pseudomonas stutzeri GN=merD PE=4 SV=1  
BAC0457|zinT|yodA|sp|P76344|ZINT\_ECOLI Metal-binding protein ZinT OS=Escherichia coli (strain K12) GN=zinT PE=4 SV=1  
BAC0702|ncrA|tr|Q8VTR6|Q8VTR6\_HAFAL NcrA OS=Hafnia alvei GN=ncrA PE=4 SV=1  
BAC0576|arsB|sp|P52146|ARSB2\_ECOLX Arsenical pump membrane protein OS=Escherichia coli GN=arsB PE=4 SV=1  
BAC0446|yhcN|sp|P64614|YHCN\_ECOLI Uncharacterized protein YhcN OS=Escherichia coli (strain K12) GN=yhcN PE=4 SV=1  
BAC0304|pcoB|sp|Q47453|PCOB\_ECOLX Copper resistance protein B OS=Escherichia coli GN=pcoB PE=4 SV=1  
BAC0608|modE|sp|P0A9G8|MODE\_ECOLI Transcriptional regulator ModE OS=Escherichia coli (strain K12) GN=modE PE=4 SV=1  
BAC0203|cnrA|sp|P37972|CNRA\_RALME Nickel and cobalt resistance protein CnrA OS=Ralstonia metallidurans GN=cnrA PE=4 SV=1  
BAC0316|pstB|sp|P0AAH0|PSTB\_ECOLI Phosphate import ATP-binding protein PstB OS=Escherichia coli (strain K12) GN=pstB PE=4 SV=1  
BAC0167|fieF|yjiP|sp|P69380|FIEF\_ECOLI Ferrous-iron efflux pump FieF OS=Escherichia coli (strain K12) GN=fieF PE=4 SV=1  
BAC0384|tehA|sp|P25396|TEHA\_ECOLI Tellurite resistance protein TehA OS=Escherichia coli (strain K12) GN=tehA PE=4 SV=1  
BAC0703|ncrB|tr|Q8VTR5|Q8VTR5\_HAFAL NcrB OS=Hafnia alvei GN=ncrB PE=4 SV=1  
BAC0653|merA|tr|Q934S5|Q934S5\_THIFE Mercuric ion reductase OS=Thiobacillus ferrooxidans GN=merA PE=4 SV=1  
BAC0452|yqjH|sp|Q46871|YQJH\_ECOLI NADPH-dependent ferric-chelate reductase OS=Escherichia coli (strain K12) GN=yqjH PE=4 SV=1  
BAC0135|dpsA|tr|Q8KR86|Q8KR86\_BURPE DpsA OS=Burkholderia pseudomallei GN=dpsA PE=3 SV=1  
BAC0279|nirD|tr|Q6RUG0|Q6RUG0\_KLEOX NirD OS=Klebsiella oxytoca GN=nirD PE=4 SV=1  
BAC0620|copA|sp|P32113|COPA\_ENTHA Probable copper-importing P-type ATPase A OS=Enterococcus hirae (strain ATCC 29512) GN=copA PE=4 SV=1  
BAC0662|merB3|tr|Q9RHR0|Q9RHR0\_BACME MerB3 OS=Bacillus megaterium GN=merB3 PE=4 SV=2  
BAC0133|dnaK|sp|P0A5B9|DNAK\_MYCTU Chaperone protein DnaK OS=Mycobacterium tuberculosis GN=dnaK PE=4 SV=1  
BAC0588|arsR|tr|P74986|P74986\_YEREN Arsenite inducible repressor OS=Yersinia enterocolitica GN=arsR PE=4 SV=1  
BAC0693|merT|tr|Q79F00|Q79F00\_9PSED Mercuric transport protein OS=Pseudomonas sp. K-62 GN=merT PE=4 SV=1  
BAC0573|arsB|sp|P45946|ARSB\_BACSU Arsenite resistance protein ArsB OS=Bacillus subtilis (strain 168) GN=arsB PE=4 SV=1  
BAC0077|copA|sp|P12374|COPA\_PSEUB Copper resistance protein A OS=Pseudomonas syringae pv. tomato GN=copA PE=4 SV=1

BAC0240|mexI|tr|Q9HWH4|Q9HWH4\_PSEAE Probable Resistance-Nodulation-Cell Division (RND) efflux tra  
BAC0670|merE|tr|Q52104|Q52104\_9ZZZZ Uncharacterized protein OS=Plasmid pDU1358 PE=4 SV=1  
BAC0589|arsR|sp|P15905|ARSR1\_ECOLX Arsenical resistance operon repressor OS=Escherichia coli GN=arsR  
BAC0368|sodA|sp|P00448|SODM\_ECOLI Superoxide dismutase [Mn] OS=Escherichia coli (strain K12) GN=sod  
BAC0700|ncrC|tr|Q1KLR0|Q1KLR0\_SERMA NcrC OS=Serratia marcescens GN=ncrC PE=4 SV=1  
BAC0267|nczA|tr|B8GZE9|B8GZE9\_CAUCN Cobalt-zinc-cadmium resistance protein czcA OS=Caulobacter cro  
BAC0136|dsbA|sp|P0AEG4|DSBA\_ECOLI Thiol:disulfide interchange protein DsbA OS=Escherichia coli (strain  
BAC0271|nikB|sp|P33591|NIKB\_ECOLI Nickel transport system permease protein NikB OS=Escherichia coli (s  
BAC0538|chrR|tr|Q7BD45|Q7BD45\_PSEPU Chromate reductase OS=Pseudomonas putida GN=chrR PE=4 SV=1  
BAC0465|znuC|yebM|sp|P0A9X1|ZNUC\_ECOLI Zinc import ATP-binding protein ZnuC OS=Escherichia coli (s  
BAC0087|mgtA|sp|P0ABB8|ATMA\_ECOLI Magnesium-transporting ATPase, P-type 1 OS=Escherichia coli (str  
BAC0392|terZ|sp|Q52353|TERZ\_SERMA Tellurium resistance protein TerZ OS=Serratia marcescens GN=terZ F  
BAC0349|sitA|tr|Q9XCS2|Q9XCS2\_SALTI Iron transport protein, periplasmic-binding protein OS=Salmonella ty  
BAC0204|cnrB|sp|P37973|CNRB\_RALME Nickel and cobalt resistance protein CnrB OS=Ralstonia metallidurans  
BAC0343|silC|sp|Q9ZHD2|SILC\_SALTM Probable outer membrane lipoprotein SilC OS=Salmonella typhimurium  
BAC0630|copC|sp|P12376|COPC\_PSEUB Copper resistance protein C OS=Pseudomonas syringae pv. tomato GN  
BAC0391|terW|sp|P75010|TERW\_SERMA Tellurium resistance protein TerW OS=Serratia marcescens GN=terW  
BAC0303|pcoA|sp|Q47452|PCOA\_ECOLX Copper resistance protein A OS=Escherichia coli GN=pcoA PE=3 SV=1  
BAC0684|merR2|tr|Q7DKL2|Q7DKL2\_9PSED MerR2 OS=Pseudomonas sp. K-62 GN=merR2 PE=4 SV=1  
BAC0024|aioX|aoxX|tr|G8XNW6|G8XNW6\_RHIRD AioX (Fragment) OS=Rhizobium radiobacter GN=aioX PE=3 SV=1  
BAC0203|cnrA|sp|P37972|CNRA\_RALME Nickel and cobalt resistance protein CnrA OS=Ralstonia metallidurans  
BAC0685|merR|tr|H6WCN2|H6WCN2\_9FLAO MerR OS=Tenacibaculum discolor GN=merR PE=4 SV=1  
BAC0700|ncrC|tr|Q1KLR0|Q1KLR0\_SERMA NcrC OS=Serratia marcescens GN=ncrC PE=4 SV=1  
BAC0539|chrR|sp|P96977|CHRR\_PSEUG CR(VI) reductase OS=Pseudomonas sp. (strain G-1) GN=chrR PE=3 SV=1  
BAC0315|pstA|sp|P07654|PSTA\_ECOLI Phosphate transport system permease protein PstA OS=Escherichia coli  
BAC0316|pstB|sp|P0AAH0|PSTB\_ECOLI Phosphate import ATP-binding protein PstB OS=Escherichia coli (stra  
BAC0076|comR|ycfQ|sp|P75952|COMR\_ECOLI HTH-type transcriptional repressor ComR OS=Escherichia coli  
BAC0134|dpr|dps|sp|P0CB53|DPS\_STRSU DNA protection during starvation protein OS=Streptococcus suis GN  
BAC0368|sodA|sp|P00448|SODM\_ECOLI Superoxide dismutase [Mn] OS=Escherichia coli (strain K12) GN=sod  
BAC0390|terE|sp|P18782|TERE\_ALCSP Tellurium resistance protein TerE OS=Alcaligenes sp. GN=terE PE=3 SV=1  
BAC0252|mntP|yebN|sp|P76264|MNTP\_ECOLI Probable manganese efflux pump MntP OS=Escherichia coli (str  
BAC0699|ncrB|tr|Q1KLR1|Q1KLR1\_SERMA NcrB OS=Serratia marcescens GN=ncrB PE=4 SV=1  
BAC0490|G2alt|tr|B0FSM1|B0FSM1\_9BACI 7-cyano-7-deazaguanine synthase OS=Anoxybacillus gonensis GN  
BAC0459|zitB|ybgR|sp|P75757|ZITB\_ECOLI Zinc transporter ZitB OS=Escherichia coli (strain K12) GN=zitB F  
BAC0466|zraP|sp|Q9L9I0|ZRAP\_SALTY Zinc resistance-associated protein OS=Salmonella typhimurium (strain  
BAC0654|merB1|sp|P16172|MERB\_BACCE Alkylmercury lyase OS=Bacillus cereus GN=merB1 PE=3 SV=2  
BAC0577|arsB|sp|P74985|ARSB\_YEREN Arsenical pump membrane protein OS=Yersinia enterocolitica GN=ars  
BAC0278|nirC|tr|Q6RUG1|Q6RUG1\_KLEOX NirC OS=Klebsiella oxytoca GN=nirC PE=4 SV=1  
BAC0641|corA|sp|P0A2R8|CORA\_SALTY Magnesium transport protein CorA OS=Salmonella typhimurium (str  
BAC0645|mdtA|tr|D0ZND8|D0ZND8\_SALT1 Multidrug resistance protein MdtA OS=Salmonella typhimurium  
BAC0630|copC|sp|P12376|COPC\_PSEUB Copper resistance protein C OS=Pseudomonas syringae pv. tomato GN  
BAC0627|copB|tr|F4ZD00|F4ZD00\_9XANT Copper resistance protein B OS=Xanthomonas alfalfae subsp. citru  
BAC0122|czcD|sp|P13512|CZCD\_RALME Cobalt-zinc-cadmium resistance protein CzcD OS=Ralstonia metallic  
BAC0161|fbpB|sp|P71338|FBPB2\_HAEIN Fe(3+)-transport system permease protein FbpB 2 OS=Haemophilus  
BAC0167|fieF|yqip|sp|P69380|FIEF\_ECOLI Ferrous-iron efflux pump FieF OS=Escherichia coli (strain K12) GN  
BAC0679|merP|tr|O66047|O66047\_PSEST Mercury transport protein OS=Pseudomonas stutzeri GN=merP PE=4 SV=1

BAC0342|silB|sp|Q9ZHD0|SILB\_SALTM Putative membrane fusion protein SilB OS=Salmonella typhimurium  
BAC0121|czcC|sp|P13509|CZCC\_RALME Cobalt-zinc-cadmium resistance protein CzcC OS=Ralstonia metallidurans (strain CH)  
BAC0626|copB|sp|P12375|COPB\_PSEUB Copper resistance protein B OS=Pseudomonas syringae pv. tomato G  
BAC0681|merR2|tr|Q9WWL1|Q9WWL1\_BACSR Mercury resistance operon negative regulator MerR2 OS=Bacillus cereus  
BAC0665|merD|tr|O66022|O66022\_PSEST Mercury operon coregulator protein OS=Pseudomonas stutzeri GN=merD PE=4 SV=1  
BAC0349|sitA|tr|Q9XCS2|Q9XCS2\_SALTI Iron transport protein, periplasmic-binding protein OS=Salmonella typhimurium  
BAC0584|arsC|sp|O50595|ARSC\_ACIMA Arsenate reductase OS=Acidiphilium multivorum (strain DSM 11245)  
BAC0690|merT|tr|Q934S7|Q934S7\_THIFE Mercuric ion transport protein OS=Thiobacillus ferrooxidans GN=merT PE=3 SV=1  
BAC0130|czrA|tr|Q9RLI8|Q9RLI8\_PSEAI CzrA protein OS=Pseudomonas aeruginosa GN=czrA PE=4 SV=1  
BAC0023|aioS/aoxS|tr|Q2VGB2|Q2VGB2\_RHIRD Putative sensor histidine kinase OS=Rhizobium radiobacter G  
BAC0357|recG|tr|B5L350|B5L350\_9PSED ATP-dependent DNA helicase (Fragment) OS=Pseudomonas corrugata  
BAC0224|merA|sp|P16171|MERA\_BACCE Mercuric reductase OS=Bacillus cereus GN=merA PE=1 SV=1  
BAC0355|ruvB|sp|Q51426|RUVB\_PSEAE Holliday junction ATP-dependent DNA helicase RuvB OS=Pseudomonas aeruginosa  
BAC0350|sitB|tr|Q9XCS1|Q9XCS1\_SALTM SitB OS=Salmonella typhimurium GN=sitB PE=3 SV=1  
BAC0388|terC|sp|P18780|TERC\_ALCSP Tellurium resistance protein TerC OS=Alcaligenes sp. GN=terC PE=3 SV=1  
BAC0110|cusF/cusX|sp|P77214|CUSF\_ECOLI Cation efflux system protein CusF OS=Escherichia coli (strain K12) GN=cusF PE=3 SV=1  
BAC0276|nirA|tr|Q6RUG3|Q6RUG3\_KLEOX NirA OS=Klebsiella oxytoca GN=nirA PE=4 SV=1  
BAC0498|ideR|sp|P0A672|IDER\_MYCTU Iron-dependent repressor IdeR OS=Mycobacterium tuberculosis GN=ideR PE=3 SV=1  
BAC0056|cadC|sp|P20047|CADC\_STAAU Cadmium resistance transcriptional regulatory protein CadC OS=Staphylococcus aureus  
BAC0625|copA|tr|F4ZCZ9|F4ZCZ9\_9XANT Copper resistance protein A OS=Xanthomonas alfalfae subsp. citri GN=copA PE=3 SV=1  
BAC0668|merD|tr|Q5NUV1|Q5NUV1\_RALME MerD from Tn4378, regulatory protein involved in Hg(II) resistance OS=Ralstonia metallidurans (strain CH)  
BAC0675|merP|tr|O07301|O07301\_9PSED Mercuric transport protein periplasmic component OS=Pseudomonas aeruginosa  
BAC0100|ctpG|sp|P63689|CTPG\_MYCTU Probable cation-transporting ATPase G OS=Mycobacterium tuberculosis GN=ctpG PE=3 SV=1  
BAC0548|chrA1|sp|P17551|CHRA1\_RALME Chromate transport protein OS=Ralstonia metallidurans (strain CH)  
BAC0101|ctpV|sp|P77894|CTPV\_MYCTU Probable copper-exporting P-type ATPase V OS=Mycobacterium tuberculosis GN=ctpV PE=3 SV=1  
BAC0608|modE|sp|P0A9G8|MODE\_ECOLI Transcriptional regulator ModE OS=Escherichia coli (strain K12) GN=modE PE=3 SV=1  
BAC0079|copB|sp|P05425|COPB\_ENTHA Copper-exporting P-type ATPase B OS=Enterococcus hirae (strain ATCC 29542) GN=copB PE=3 SV=1  
BAC0114|cutC|sp|P67826|CUTC\_ECOLI Copper homeostasis protein CutC OS=Escherichia coli (strain K12) GN=cutC PE=3 SV=1  
BAC0341|silA|sp|Q9ZHC9|SILA\_SALTM Putative cation efflux system protein SilA OS=Salmonella typhimurium  
BAC0666|merD|tr|O66018|O66018\_PSEST MerD OS=Pseudomonas stutzeri GN=merD PE=4 SV=1  
BAC0649|merA|tr|E3VST6|E3VST6\_9FLAO MerA OS=Tenacibaculum discolor GN=merA PE=3 SV=1  
BAC0642|mgtA|sp|P36640|ATMA\_SALTY Magnesium-transporting ATPase, P-type 1 OS=Salmonella typhimurium  
BAC0285|nreB|tr|F0KND8|F0KND8\_ACICP NrsD, nreB nickel permease involved in nickel and cobalt tolerance OS=Bacillus cereus  
BAC0087|mgtA|sp|P0ABB8|ATMA\_ECOLI Magnesium-transporting ATPase, P-type 1 OS=Escherichia coli (strain K12) GN=mgtA PE=3 SV=1  
BAC0464|znuB/yebI|sp|P39832|ZNUB\_ECOLI High-affinity zinc uptake system membrane protein ZnuB OS=Escherichia coli (strain K12) GN=znuB PE=3 SV=1  
BAC0240|mexI|tr|Q9HWH4|Q9HWH4\_PSEAE Probable Resistance-Nodulation-Cell Division (RND) efflux transporter OS=Escherichia coli (strain K12) GN=mexI PE=3 SV=1  
BAC0589|arsR|sp|P15905|ARSR1\_ECOLX Arsenical resistance operon repressor OS=Escherichia coli GN=arsR PE=3 SV=1  
BAC0264|ncrB|tr|Q06VT2|Q06VT2\_9BACT NcrB OS=Leptospirillum ferriphilum GN=ncrB PE=4 SV=1  
BAC0352|sitD|tr|Q9XCR9|Q9XCR9\_SALTM SitD OS=Salmonella typhimurium GN=sitD PE=3 SV=1  
BAC0568|actP|sp|Q9X5V3|ATCU\_RHILV Copper-transporting P-type ATPase OS=Rhizobium leguminosarum GN=actP PE=3 SV=1  
BAC0656|merB3|tr|Q7DHE7|Q7DHE7\_BACCE Organomercurial lyase enzyme OS=Bacillus cereus GN=merB3 PE=3 SV=1  
BAC0389|terD|sp|P18781|TERD\_ALCSP Tellurium resistance protein TerD OS=Alcaligenes sp. GN=terD PE=3 SV=1  
BAC0455|ziaA|sp|Q59998|ATZN\_SYNY3 Zinc-transporting ATPase OS=Synechocystis sp. (strain PCC 6803 / FACHS-1) GN=ziaA PE=3 SV=1  
BAC0135|dpsA|tr|Q8KR86|Q8KR86\_BURPE DpsA OS=Burkholderia pseudomallei GN=dpsA PE=3 SV=1  
BAC0030|arsA|sp|P52145|ARSA2\_ECOLX Arsenical pump-driving ATPase OS=Escherichia coli GN=arsA PE=3 SV=1  
BAC0273|nikD|sp|P33593|NIKD\_ECOLI Nickel import ATP-binding protein NikD OS=Escherichia coli (strain K12) GN=nikD PE=3 SV=1

BAC0585|arsC|sp|P74984|ARSC\_YEREN Arsenate reductase OS=Yersinia enterocolitica GN=arsC PE=3 SV=1  
BAC0231|merP|sp|P13113|MERP\_SERMA Mercuric transport protein periplasmic component OS=Serratia marcescens GN=merP PE=4 SV=1  
BAC0702|ncrA|tr|Q8VTR6|Q8VTR6\_HAFAL NcrA OS=Hafnia alvei GN=ncrA PE=4 SV=1  
BAC0266|ncrY|tr|Q06VT0|Q06VT0\_9BACT NcrY OS=Leptospirillum ferriphilum GN=ncrY PE=4 SV=1  
BAC0181|glpF|sp|P0AER0|GLPF\_ECOLI Glycerol uptake facilitator protein OS=Escherichia coli (strain K12) GN=glpF PE=4 SV=1  
BAC0077|copA|sp|P12374|COPA\_PSEUB Copper resistance protein A OS=Pseudomonas syringae pv. tomato GN=copA PE=4 SV=1  
BAC0638|copR|tr|C6FFR4|C6FFR4\_PSEFL CopR OS=Pseudomonas fluorescens GN=copR PE=4 SV=1  
BAC0063|chrA|sp|P14285|CHRA\_PSEAI Chromate transport protein OS=Pseudomonas aeruginosa GN=chrA PE=4 SV=1  
BAC0330|rcnA|yohM|sp|P76425|RCNA\_ECOLI Nickel/cobalt efflux system RcnA OS=Escherichia coli (strain K12) GN=rcnA PE=4 SV=1  
BAC0164|fecE|sp|P15031|FECE\_ECOLI Fe(3+) dicitrate transport ATP-binding protein FecE OS=Escherichia coli (strain K12) GN=fecE PE=4 SV=1  
BAC0345|silF|tr|Q9ZHD1|Q9ZHD1\_SALTM Uncharacterized protein OS=Salmonella typhimurium GN=ORF9605 PE=4 SV=1  
BAC0179|gesB|tr|Q8ZRG9|Q8ZRG9\_SALTY Putative cation efflux system protein OS=Salmonella typhimurium GN=gesB PE=4 SV=1  
BAC0470|zur|yjbK|sp|P0AC51|ZUR\_ECOLI Zinc uptake regulation protein OS=Escherichia coli (strain K12) GN=zur PE=4 SV=1  
BAC0703|ncrB|tr|Q8VTR5|Q8VTR5\_HAFAL NcrB OS=Hafnia alvei GN=ncrB PE=4 SV=1  
BAC0432|ybtP|tr|Q9R7V3|Q9R7V3\_YERPE Lipoprotein inner membrane ABC-transporter OS=Yersinia pestis GN=ybtP PE=4 SV=1  
BAC0434|ychH|sp|P0AB49|YCHH\_ECOLI Uncharacterized protein YchH OS=Escherichia coli (strain K12) GN=ychH PE=4 SV=1  
BAC0098|ctpC|sp|P0A502|CTPC\_MYCTU Probable manganese/zinc-exporting P-type ATPase OS=Mycobacterium tuberculosis GN=ctpC PE=4 SV=1  
BAC0540|nfsA|sp|P17117|NFSA\_ECOLI Oxygen-insensitive NADPH nitroreductase OS=Escherichia coli (strain K12) GN=nfsA PE=4 SV=1  
BAC0302|pbrT|tr|Q5GR69|Q5GR69\_ALCXX Lead uptake protein PbrT OS=Alcaligenes xylosoxydans GN=pbrT PE=4 SV=1  
BAC0451|yodD|sp|P64519|YODD\_ECOLI Uncharacterized protein YodD OS=Escherichia coli (strain K12) GN=yodD PE=4 SV=1  
BAC0640|copD|tr|C6FFR7|C6FFR7\_PSEFL CopD OS=Pseudomonas fluorescens GN=copD PE=4 SV=1  
BAC0263|ncrA|tr|Q06VT3|Q06VT3\_9BACT NcrA OS=Leptospirillum ferriphilum GN=ncrA PE=4 SV=1  
BAC0620|copA|sp|P32113|COPA\_ENTHA Probable copper-importing P-type ATPase A OS=Enterococcus hirae GN=copA PE=4 SV=1  
BAC0113|cutA|sp|P69488|CUTA\_ECOLI Divalent-cation tolerance protein CutA OS=Escherichia coli (strain K12) GN=cutA PE=4 SV=1  
BAC0452|yqjH|sp|Q46871|YQJH\_ECOLI NADPH-dependent ferric-chelate reductase OS=Escherichia coli (strain K12) GN=yqjH PE=4 SV=1  
BAC0346|silP|sp|Q9ZHC7|SILP\_SALTM Silver exporting P-type ATPase OS=Salmonella typhimurium GN=silP PE=4 SV=1  
BAC0270|nikA|sp|P33590|NIKA\_ECOLI Nickel-binding periplasmic protein OS=Escherichia coli (strain K12) GN=nikA PE=4 SV=1  
BAC0034|arsH|tr|E8PS81|E8PS81\_YERPE Arsenic resistance protein ArsH OS=Yersinia pestis Java 9 GN=arsH PE=4 SV=1  
BAC0136|dsbA|sp|P0AEG4|DSBA\_ECOLI Thiol:disulfide interchange protein DsbA OS=Escherichia coli (strain K12) GN=dsbA PE=4 SV=1  
BAC0384|tehA|sp|P25396|TEHA\_ECOLI Tellurite resistance protein TehA OS=Escherichia coli (strain K12) GN=tehA PE=4 SV=1  
BAC0088|corC|sp|P0A2L3|CORC\_SALTY Magnesium and cobalt efflux protein CorC OS=Salmonella typhimurium GN=corC PE=4 SV=1  
BAC0670|merE|tr|Q52104|Q52104\_9ZZZZ Uncharacterized protein OS=Plasmid pDU1358 PE=4 SV=1  
BAC0684|merR2|tr|Q7DKL2|Q7DKL2\_9PSED MerR2 OS=Pseudomonas sp. K-62 GN=merR2 PE=4 SV=1  
BAC0573|arsB|sp|P45946|ARSB\_BACSU Arsenite resistance protein ArsB OS=Bacillus subtilis (strain 168) GN=arsB PE=4 SV=1  
BAC0107|cusA|ybdE|sp|P38054|CUSA\_ECOLI Cation efflux system protein CusA OS=Escherichia coli (strain K12) GN=cusA PE=4 SV=1  
BAC0582|arsC|sp|P08692|ARSC1\_ECOLX Arsenate reductase OS=Escherichia coli GN=arsC PE=1 SV=1  
BAC0563|acrD|tr|Q8ZN77|Q8ZN77\_SALTY RND family aminoglycoside/multidrug efflux pump OS=Salmonella typhimurium GN=acrD PE=4 SV=1  
BAC0108|cusB|sp|P77239|CUSB\_ECOLI Cation efflux system protein CusB OS=Escherichia coli (strain K12) GN=cusB PE=4 SV=1  
BAC0691|merT|tr|Q52397|Q52397\_PSEST Mercury transport protein OS=Pseudomonas stutzeri GN=merT PE=4 SV=1  
BAC0571|arsA|sp|O50593|ARSA\_ACIMA Arsenical pump-driving ATPase OS=Acidiphilium multivorum (strain ATCC 35061) GN=arsA PE=4 SV=1  
BAC0347|silR|sp|Q9ZHD3|SILR\_SALTM Probable transcriptional regulatory protein SilR OS=Salmonella typhimurium GN=silR PE=4 SV=1  
BAC0657|merB|tr|O07303|O07303\_9PSED Alkylmercury lyase OS=Pseudomonas sp. K-62 GN=merB PE=3 SV=1  
BAC0137|dsbB|sp|P0A6M2|DSBB\_ECOLI Disulfide bond formation protein B OS=Escherichia coli (strain K12) GN=dsbB PE=4 SV=1  
BAC0565|actR|sp|A6UEL7|ACTR\_SINMW Acid tolerance regulatory protein ActR OS=Sinorhizobium medicae GN=actR PE=4 SV=1  
BAC0387|terB|sp|P18779|TERB\_ALCSP Tellurium resistance protein TerB OS=Alcaligenes sp. GN=terB PE=4 SV=1  
BAC0611|modC|sp|P09833|MODC\_ECOLI Molybdenum import ATP-binding protein ModC OS=Escherichia coli (strain K12) GN=modC PE=4 SV=1

BAC0331|rcnB|yohN|sp|P64534|RCNB\_ECOLI Nickel/cobalt homeostasis protein RcnB OS=Escherichia coli (strain K12) GN=rcnB PE=4 SV=1  
 BAC0698|ncrA|tr|Q1KLR2|Q1KLR2\_SERMA NcrA OS=Serratia marcescens GN=ncrA PE=4 SV=1  
 BAC0083|copR|sp|Q02540|COPR\_PSEUB Transcriptional activator protein CopR OS=Pseudomonas syringae pv. moultonii GN=copR PE=4 SV=1  
 BAC0461|zntA|yhhO|sp|P37617|ATZN\_ECOLI Lead, cadmium, zinc and mercury-transporting ATPase OS=Escherichia coli (strain K12) GN=zntA PE=4 SV=1  
 BAC0653|merA|tr|Q934S5|Q934S5\_THIFE Mercuric ion reductase OS=Thiobacillus ferrooxidans GN=merA PE=4 SV=1  
 BAC0462|zntR|yhdM|sp|P0ACS5|ZNTR\_ECOLI HTH-type transcriptional regulator ZntR OS=Escherichia coli (strain K12) GN=zntR PE=4 SV=1  
 BAC0695|merT|sp|P13112|MERT\_SERMA Mercuric transport protein OS=Serratia marcescens GN=merT PE=4 SV=1  
 BAC0029|chrF|tr|A4UQR2|A4UQR2\_9RHIZ ChrF OS=Ochrobactrum tritici GN=chrF PE=4 SV=1  
 BAC0385|tehB|sp|P25397|TEHB\_ECOLI Tellurite methyltransferase OS=Escherichia coli (strain K12) GN=tehB PE=4 SV=1  
 BAC0457|zinT|yodA|sp|P76344|ZINT\_ECOLI Metal-binding protein ZinT OS=Escherichia coli (strain K12) GN=zinT PE=4 SV=1  
 BAC0467|zraR|hydH|sp|P14375|ZRAR\_ECOLI Transcriptional regulatory protein ZraR OS=Escherichia coli (strain K12) GN=zraR PE=4 SV=1  
 BAC0661|merB2|tr|Q7DJN2|Q7DJN2\_BACME MerB2 OS=Bacillus megaterium GN=merB2 PE=4 SV=1  
 BAC0538|chrR|tr|Q7BD45|Q7BD45\_PSEPU Chromate reductase OS=Pseudomonas putida GN=chrR PE=4 SV=1  
 BAC0468|zraS|hydG|sp|P14377|ZRAS\_ECOLI Sensor protein ZraS OS=Escherichia coli (strain K12) GN=zraS PE=4 SV=1  
 BAC0572|arsA|sp|P08690|ARSA1\_ECOLX Arsenical pump-driving ATPase OS=Escherichia coli GN=arsA PE=4 SV=1  
 BAC0646|mdtB|tr|D0ZND9|D0ZND9\_SALT1 Multidrug resistance protein MdtB OS=Salmonella typhimurium GN=mdtB PE=4 SV=1  
 BAC0303|pcoA|sp|Q47452|PCOA\_ECOLX Copper resistance protein A OS=Escherichia coli GN=pcoA PE=3 SV=1  
 BAC0463|znuA|yebL|sp|P39172|ZNUA\_ECOLI High-affinity zinc uptake system protein ZnuA OS=Escherichia coli (strain K12) GN=znuA PE=4 SV=1  
 BAC0253|mntR|sp|P0A9F1|MNTR\_ECOLI Transcriptional regulator MntR OS=Escherichia coli (strain K12) GN=mntR PE=4 SV=1  
 BAC0138|dsbC|sp|P0AEG6|DSBC\_ECOLI Thiol:disulfide interchange protein DsbC OS=Escherichia coli (strain K12) GN=dsbC PE=4 SV=1  
 BAC0026|chrA|tr|A4UQR4|A4UQR4\_9RHIZ Chromate transporter OS=Ochrobactrum tritici GN=chrA PE=4 SV=1  
 BAC0704|ncrC|tr|Q8VTR4|Q8VTR4\_HAFAL NcrC OS=Hafnia alvei GN=ncrC PE=4 SV=1  
 BAC0265|ncrC|tr|D5CKG5|D5CKG5\_ENTCC Nickel-resistant membrane protein-like protein NcrC OS=Enterobacter cloacae GN=ncrC PE=4 SV=1  
 BAC0650|merA|tr|O08449|O08449\_9PSED Mercuric reductase OS=Pseudomonas sp. K-62 GN=merA PE=4 SV=1  
 BAC0707|sodB|sp|P0AGD3|SODF\_ECOLI Superoxide dismutase [Fe] OS=Escherichia coli (strain K12) GN=sodB PE=4 SV=1  
 BAC0183|golT|tr|Q8ZRG7|Q8ZRG7\_SALTY Putative cation transport ATPase OS=Salmonella typhimurium (strain ATCC 14028) GN=golT PE=4 SV=1  
 BAC0549|nccA|sp|Q44586|NCCA\_ALCXX Nickel-cobalt-cadmium resistance protein NccA OS=Alcaligenes xylosoxidans GN=nccA PE=4 SV=1  
 BAC0298|pbrA|tr|Q58AJ6|Q58AJ6\_RALME P-type ATPase involved in Pb(II) resistance PbrA OS=Ralstonia solanaceae GN=pbrA PE=4 SV=1  
 BAC0039|baeR|sp|P69228|BAER\_ECOLI Transcriptional regulatory protein BaeR OS=Escherichia coli (strain K12) GN=baeR PE=4 SV=1  
 BAC0233|merT|sp|P94185|MERT\_ALCSP Mercuric transport protein OS=Alcaligenes sp. GN=merT PE=3 SV=1  
 BAC0567|actA|sp|Q52910|LNT\_SINMW Apolipoprotein N-acyltransferase OS=Sinorhizobium medicae (strain V) GN=actA PE=4 SV=1  
 BAC0116|cutF|nlpE|sp|P40710|NLPE\_ECOLI Lipoprotein NlpE OS=Escherichia coli (strain K12) GN=nlpE PE=4 SV=1  
 BAC0597|baeS|tr|D0ZNE2|D0ZNE2\_SALT1 Signal transduction histidine-protein kinase BaeS OS=Salmonella typhimurium GN=baeS PE=4 SV=1  
 BAC0255|mreA|tr|Q88IN0|Q88IN0\_PSEPK Putative uncharacterized protein OS=Pseudomonas putida (strain KT) GN=mreA PE=4 SV=1  
 BAC0343|silC|sp|Q9ZHD2|SILC\_SALTM Probable outer membrane lipoprotein SilC OS=Salmonella typhimurium GN=silC PE=4 SV=1  
 BAC0594|arsR|sp|P37309|ARSR\_ECOLI Arsenical resistance operon repressor OS=Escherichia coli (strain K12) GN=arsR PE=4 SV=1  
 BAC0066|chrF|tr|Q5NUZ7|Q5NUZ7\_RALME ChrF, regulatory protein, involved in Chromate resistance OS=Ralstonia solanaceae GN=chrF PE=4 SV=1  
 BAC0469|zupT|ygiE|sp|P0A8H3|ZUPT\_ECOLI Zinc transporter ZupT OS=Escherichia coli (strain K12) GN=zupT PE=4 SV=1  
 BAC0356|recG|tr|Q9HTL3|Q9HTL3\_PSEAE ATP-dependent DNA helicase RecG OS=Pseudomonas aeruginosa GN=recG PE=4 SV=1  
 BAC0012|actP|sp|Q9X5X3|ATCU\_SINMW Copper-transporting P-type ATPase OS=Sinorhizobium medicae (strain V) GN=actP PE=4 SV=1  
 BAC0678|merP|tr|O66016|O66016\_PSEST MerP OS=Pseudomonas stutzeri GN=merP PE=4 SV=1  
 BAC0694|merT-P|tr|H6WCN3|H6WCN3\_9FLAO MerT-P OS=Tenacibaculum discolor GN=merT-P PE=4 SV=1  
 BAC0596|baeR|tr|D0ZNE3|D0ZNE3\_SALT1 DNA-binding transcriptional regulator BaeR OS=Salmonella typhimurium GN=baeR PE=4 SV=1  
 BAC0648|merA|sp|P08662|MERA\_SERMA Mercuric reductase (Fragments) OS=Serratia marcescens GN=merA PE=4 SV=1  
 BAC0639|copC|tr|C6FFR6|C6FFR6\_PSEFL CopC OS=Pseudomonas fluorescens GN=copC PE=4 SV=1  
 BAC0591|arsR|sp|P52144|ARSR2\_ECOLX Arsenical resistance operon repressor OS=Escherichia coli GN=arsR PE=4 SV=1

BAC0446|yhcN|sp|P64614|YHCN\_ECOLI Uncharacterized protein YhcN OS=Escherichia coli (strain K12) GN=yhcN PE=3 SV=1

BAC0583|arsC|sp|P52147|ARSC2\_ECOLX Arsenate reductase OS=Escherichia coli GN=arsC PE=3 SV=1

BAC0652|merA|tr|O66017|O66017\_PSEST MerA OS=Pseudomonas stutzeri GN=merA PE=4 SV=1

BAC0667|merD|sp|P08654|MERD\_SERMA HTH-type transcriptional regulator MerD OS=Serratia marcescens GN=merD PE=3 SV=1

BAC0541|yieF|sp|P0AGE6|YIEF\_ECOLI Uncharacterized protein YieF OS=Escherichia coli (strain K12) GN=yieF PE=3 SV=1

BAC0629|copB|sp|O30085|COPB\_ARCFU Copper-exporting P-type ATPase B OS=Archaeoglobus fulgidus (strain ATCC 49616) GN=copB PE=4 SV=1

BAC0392|terZ|sp|Q52353|TERZ\_SERMA Tellurium resistance protein TerZ OS=Serratia marcescens GN=terZ PE=3 SV=1

BAC0163|fecD|sp|P15029|FECD\_ECOLI Fe(3+) dicitrate transport system permease protein FecD OS=Escherichia coli (strain K12) GN=fecD PE=3 SV=1

BAC0386|terA|sp|P18778|TERA\_ALCSP Tellurium resistance protein TerA OS=Alcaligenes sp. GN=terA PE=4 SV=1

BAC0119|czcA|sp|P13511|CZCA\_RALME Cobalt-zinc-cadmium resistance protein CzcA OS=Ralstonia metallum GN=czcA PE=3 SV=1

BAC0306|pcoD|sp|Q47455|PCOD\_ECOLX Copper resistance protein D OS=Escherichia coli GN=pcoD PE=3 SV=1

BAC0162|fbpC|sp|P44513|FBPC2\_HAEIN Fe(3+) ions import ATP-binding protein FbpC 2 OS=Haemophilus influenzae (strain ATCC 49619) GN=fbpC PE=3 SV=1

BAC0383|tcrB|tr|Q8VPE6|Q8VPE6\_ENTFC TcrB OS=Enterococcus faecium GN=tcrB PE=3 SV=1

BAC0309|pcoS|sp|Q47457|PCOS\_ECOLX Probable sensor protein PcoS OS=Escherichia coli GN=pcoS PE=3 SV=1

BAC0687|merR|tr|Q79BG7|Q79BG7\_PSEST MerR OS=Pseudomonas stutzeri GN=merR PE=4 SV=1

BAC0692|merT|tr|Q79BG6|Q79BG6\_PSEST MerT OS=Pseudomonas stutzeri GN=merT PE=4 SV=1

BAC0348|silS|sp|Q9ZHD4|SILS\_SALTM Probable sensor kinase SilS OS=Salmonella typhimurium GN=silS PE=3 SV=1

BAC0587|arsD|sp|P52148|ARSD2\_ECOLX Arsenical resistance operon trans-acting repressor ArsD OS=Escherichia coli (strain K12) GN=arsD PE=3 SV=1

BAC0111|cusR|ylcA|sp|P0ACZ8|CUSR\_ECOLI Transcriptional regulatory protein CusR OS=Escherichia coli (strain K12) GN=cusR PE=3 SV=1

BAC0619|copA|tr|Q7WYH1|Q7WYH1\_PSEPU CopA OS=Pseudomonas putida GN=copA PE=4 SV=1

BAC0040|baeS|sp|P30847|BAES\_ECOLI Signal transduction histidine-protein kinase BaeS OS=Escherichia coli (strain K12) GN=baeS PE=3 SV=1

BAC0271|nikB|sp|P33591|NIKB\_ECOLI Nickel transport system permease protein NikB OS=Escherichia coli (strain K12) GN=nikB PE=3 SV=1

BAC0254|mrdH|tr|Q88IN1|Q88IN1\_PSEPK Membrane protein, putative OS=Pseudomonas putida (strain KT244) GN=mrdH PE=3 SV=1

BAC0686|merR|sp|P13111|MERR\_SERMA Mercuric resistance operon regulatory protein OS=Serratia marcescens GN=merR PE=3 SV=1

BAC0033|arsD|sp|P46003|ARSD1\_ECOLX Arsenical resistance operon trans-acting repressor ArsD OS=Escherichia coli (strain K12) GN=arsD PE=3 SV=1

BAC0106|cuiD|sp|Q8ZRS2|CUEO\_SALTY Blue copper oxidase CueO OS=Salmonella typhimurium (strain LT2) GN=cuiD PE=3 SV=1

BAC0609|modA|sp|P37329|MODA\_ECOLI Molybdate-binding periplasmic protein OS=Escherichia coli (strain K12) GN=modA PE=3 SV=1

BAC0102|cueA|tr|Q8KWW2|Q8KWW2\_PSEPU Copper transporter OS=Pseudomonas putida GN=cueA PE=3 SV=1

BAC0251|mntH|yfeP|sp|P0A769|MNTH\_ECOLI Divalent metal cation transporter MntH OS=Escherichia coli (strain K12) GN=mntH PE=3 SV=1

BAC0693|merT|tr|Q79F00|Q79F00\_9PSED Mercuric transport protein OS=Pseudomonas sp. K-62 GN=merT PE=3 SV=1

BAC0049|bhsA|ycfR/comC|sp|P0AB40|BHSA\_ECOLI Multiple stress resistance protein BhsA OS=Escherichia coli (strain K12) GN=bhsA PE=3 SV=1

BAC0643|corB|tr|Q9X621|Q9X621\_SALTM CorB OS=Salmonella typhimurium GN=corB PE=4 SV=1

BAC0576|arsB|sp|P52146|ARSB2\_ECOLX Arsenical pump membrane protein OS=Escherichia coli GN=arsB PE=3 SV=1

BAC0082|copL|tr|Q5YKV8|Q5YKV8\_9XANT CopL OS=Xanthomonas perforans GN=copL PE=4 SV=1

BAC0628|copB|tr|F4ZBX4|F4ZBX4\_XANCI CopB OS=Xanthomonas citri subsp. citri GN=copB PE=4 SV=1

BAC0027|chrB|tr|A4UQR5|A4UQR5\_9RHIZ ChrB OS=Ochrobactrum tritici GN=chrB PE=4 SV=1

BAC0133|dnaK|sp|P0A5B9|DNAK\_MYCTU Chaperone protein DnaK OS=Mycobacterium tuberculosis GN=dnaK PE=3 SV=1

BAC0305|pcoC|sp|Q47454|PCOC\_ECOLX Copper resistance protein C OS=Escherichia coli GN=pcoC PE=1 SV=1

BAC0308|pcoR|sp|Q47456|PCOR\_ECOLX Transcriptional regulatory protein PcoR OS=Escherichia coli GN=pcoR PE=3 SV=1

BAC0659|merB|sp|P08664|MERB\_SERMA Alkylmercury lyase OS=Serratia marcescens GN=merB PE=3 SV=1

BAC0612|perO|tr|D5AQ60|D5AQ60\_RHOEB Divalent ion symporter OS=Rhodobacter capsulatus (strain ATCC 49619) GN=perO PE=3 SV=1

BAC0182|golS|tr|Q8ZRG6|Q8ZRG6\_SALTY Putative transcriptional regulator OS=Salmonella typhimurium (strain LT2) GN=golS PE=3 SV=1

BAC0307|pcoE|sp|Q47459|PCOE\_ECOLX Probable copper-binding protein PcoE OS=Escherichia coli GN=pcoE PE=3 SV=1

BAC0199|klaB|telA/kilB|sp|Q52328|KLAB\_ECOLX Protein KlaB OS=Escherichia coli GN=klaB PE=3 SV=1

BAC0003|acn|tr|O53166|O53166\_MYCTU Aconitate hydratase OS=Mycobacterium tuberculosis H37Rv GN=acn PE=3 SV=1

BAC0293|ruvB|tr|B5L348|B5L348\_9PSED Malic enzyme family protein (Fragment) OS=Pseudomonas corrugata GN=ruvB PE=3 SV=1



BAC0351|sitC|tr|Q9XCS0|Q9XCS0\_SALTM SitC OS=Salmonella typhimurium GN=sitC PE=3 SV=1  
BAC0676|merP|tr|Q7DHE4|Q7DHE4\_BACCE Mercury-binding protein OS=Bacillus cereus GN=merP PE=4 SV=1  
BAC0058|cadR|tr|Q93TP7|Q93TP7\_PSEPU CadR OS=Pseudomonas putida GN=cadR PE=4 SV=1  
BAC0579|arsB|sp|P74311|Y944\_SYNY3 Uncharacterized transporter slr0944 OS=Synechocystis sp. (strain PCC  
BAC0267|nczA|tr|B8GZE9|B8GZE9\_CAUCN Cobalt-zinc-cadmium resistance protein czcA OS=Caulobacter cro  
BAC0672|merE|tr|Q79BE4|Q79BE4\_PSEST Urf1 OS=Pseudomonas stutzeri PE=4 SV=1  
BAC0115|cutE|Int|sp|P23930|LNT\_ECOLI Apolipoprotein N-acyltransferase OS=Escherichia coli (strain K12) G  
BAC0304|pcoB|sp|Q47453|PCOB\_ECOLX Copper resistance protein B OS=Escherichia coli GN=pcoB PE=4 SV=1  
BAC0334|robA|sp|P0ACI0|ROB\_ECOLI Right origin-binding protein OS=Escherichia coli (strain K12) GN=rob  
BAC0644|corD|sp|Q56017|APAG\_SALTY Protein ApaG OS=Salmonella typhimurium (strain LT2 / SGSC1412  
BAC0447|yjaA|sp|P09162|YJAA\_ECOLI Uncharacterized protein YjaA OS=Escherichia coli (strain K12) GN=y  
BAC0124|czcP|tr|Q1LAJ7|Q1LAJ7\_RALME CzcP cation efflux P1-ATPase OS=Ralstonia metallidurans (strain  
BAC0433|ybtQ|tr|Q9Z375|Q9Z375\_YERPE Inner membrane ABC-transporter YbtQ OS=Yersinia pestis GN=yb  
BAC0166|fetB/ybbM|sp|P77307|YBBM\_ECOLI UPF0014 inner membrane protein YbbM OS=Escherichia coli (s  
BAC0570|actP|tr|D5AU53|D5AU53\_RHO�B Cation/acetate symporter ActP-1 OS=Rhodobacter capsulatus (stra  
BAC0578|arsB|tr|O50594|O50594\_ACIMU ArsB OS=Acidiphilium multivorum GN=arsB PE=4 SV=1  
BAC0169|fpvA|sp|P48632|FPVA\_PSEAE Ferripyoverdine receptor OS=Pseudomonas aeruginosa (strain ATCC  
BAC0610|modB|sp|P0AF01|MODB\_ECOLI Molybdenum transport system permease protein ModB OS=Escheri  
BAC0333|ricR|tr|O07434|O07434\_MYCTU Regulated in copper repressor OS=Mycobacterium tuberculosis H37  
BAC0689|merR|tr|Q934S8|Q934S8\_THIFE Mer operon regulatory protein OS=Thiobacillus ferrooxidans GN=m  
BAC0631|copC|tr|F4ZBX9|F4ZBX9\_XANCI CopC OS=Xanthomonas citri subsp. citri GN=copC PE=4 SV=1  
BAC0465|znuC/yebM|sp|P0A9X1|ZNUC\_ECOLI Zinc import ATP-binding protein ZnuC OS=Escherichia coli (s  
BAC0312|pitA|sp|P0AFJ7|PITA\_ECOLI Low-affinity inorganic phosphate transporter 1 OS=Escherichia coli (str  
BAC0673|merE|sp|P06690|MERE\_PSEAI Uncharacterized mercuric resistance protein MerE OS=Pseudomonas a  
BAC0317|pstC|sp|P0AGH8|PSTC\_ECOLI Phosphate transport system permease protein PstC OS=Escherichia co  
BAC0059|cadX|tr|A7LHQ4|A7LHQ4\_STRSL CadX OS=Streptococcus salivarius GN=cadX PE=4 SV=1  
BAC0344|silE|sp|Q9Z4N3|SILE\_SALTM Silver-binding protein SilE OS=Salmonella typhimurium GN=silE PE=1  
BAC0651|merA|sp|P0A0E5|MERA\_STAAU Mercuric reductase OS=Staphylococcus aureus GN=merA PE=3 SV=1  
BAC0371|soxS|sp|P0A9E2|SOXS\_ECOLI Regulatory protein SoxS OS=Escherichia coli (strain K12) GN=soxS  
BAC0682|merR1|sp|P22853|MERR\_BACCE Mercuric resistance operon regulatory protein OS=Bacillus cereus (s  
BAC0621|copA|tr|F4ZBX3|F4ZBX3\_XANCI CopA OS=Xanthomonas citri subsp. citri GN=copA PE=4 SV=1  
BAC0229|merG|tr|O07302|O07302\_9PSED Mercuric resistance protein OS=Pseudomonas sp. K-62 GN=merG P  
BAC0683|merR1|tr|O07300|O07300\_9PSED Mercuric resistance operon regulatory protein OS=Pseudomonas sp  
BAC0637|copS|tr|C6FFR5|C6FFR5\_PSEFL CopS OS=Pseudomonas fluorescens GN=copS PE=4 SV=1  
BAC0120|czcB|sp|P13510|CZCB\_RALME Cobalt-zinc-cadmium resistance protein CzcB OS=Ralstonia metallid  
BAC0647|mdtC|tr|D0ZNE0|D0ZNE0\_SALT1 Multidrug resistance protein MdtC OS=Salmonella typhimurium (s  
BAC0165|fetA/ybbL|sp|P77279|YBBL\_ECOLI Uncharacterized ABC transporter ATP-binding protein YbbL OS  
BAC0109|cusC/ylcB|sp|P77211|CUSC\_ECOLI Cation efflux system protein CusC OS=Escherichia coli (strain K  
BAC0445|ygiW|sp|P0ADU5|YGIW\_ECOLI Protein YgiW OS=Escherichia coli (strain K12) GN=ygiW PE=1 SV=1  
BAC0274|nike|sp|P33594|NIKE\_ECOLI Nickel import ATP-binding protein Nike OS=Escherichia coli (strain K  
BAC0086|corA|sp|P0ABI4|CORA\_ECOLI Magnesium transport protein CorA OS=Escherichia coli (strain K12)  
BAC0031|arsB|sp|P08691|ARSB1\_ECOLX Arsenical pump membrane protein OS=Escherichia coli GN=arsB PE=1  
BAC0112|cusS|sp|P77485|CUSS\_ECOLI Sensor kinase CusS OS=Escherichia coli (strain K12) GN=cusS PE=1  
BAC0035|arsM|tr|Q6N3Y0|Q6N3Y0\_RHOPA UbiE/COQ5 methyltransferase OS=Rhodopseudomonas palustris  
BAC0131|cztB|tr|Q9RLI9|Q9RLI9\_PSEAI CztB protein OS=Pseudomonas aeruginosa GN=cztB PE=4 SV=1  
BAC0318|pstS|sp|P0AG82|PSTS\_ECOLI Phosphate-binding protein PstS OS=Escherichia coli (strain K12) GN=

BAC0272|nikC|sp|P0AFA9|NIKC\_ECOLI Nickel transport system permease protein NikC OS=Escherichia coli (strain K12) GN=nikC PE=4 SV=1

BAC0688|merR2|tr|Q79B70|Q79B70\_PSEST Organomercurial resistance regulatory protein OS=Pseudomonas sp. K-62 GN=merR2 PE=4 SV=1

BAC0105|cueR|ybbI|sp|P0A9G4|CUER\_ECOLI HTH-type transcriptional regulator CueR OS=Escherichia coli (strain K12) GN=cueR PE=3 SV=1

BAC0332|rcnR|yohL|sp|P64530|RCNR\_ECOLI Transcriptional repressor RcnR OS=Escherichia coli (strain K12) GN=rcnR PE=4 SV=1

BAC0228|merF|tr|Q2QCN0|Q2QCN0\_9PSED MerF OS=Pseudomonas sp. CT14 GN=merF PE=4 SV=1

BAC0275|nikR|sp|P0A6Z6|NIKR\_ECOLI Nickel-responsive regulator OS=Escherichia coli (strain K12) GN=nikR PE=4 SV=1

BAC0103|cueO|sp|P36649|CUEO\_ECOLI Blue copper oxidase CueO OS=Escherichia coli (strain K12) GN=cueO PE=3 SV=1

BAC0022|aioR|aoxR|tr|Q2VGB1|Q2VGB1\_RHIRD Putative transcriptional regulator OS=Rhizobium radiobacter GN=aioR PE=4 SV=1

BAC0451|yodD|sp|P64519|YODD\_ECOLI Uncharacterized protein YodD OS=Escherichia coli (strain K12) GN=yodD PE=4 SV=1

BAC0386|terA|sp|P18778|TERA\_ALCSP Tellurium resistance protein TerA OS=Alcaligenes sp. GN=terA PE=4 SV=1

BAC0124|czcP|tr|Q1LAJ7|Q1LAJ7\_RALME CzcP cation efflux P1-ATPase OS=Ralstonia metallidurans (strain K12) GN=czcP PE=4 SV=1

BAC0392|terZ|sp|Q52353|TERZ\_SERMA Tellurium resistance protein TerZ OS=Serratia marcescens GN=terZ PE=4 SV=1

BAC0631|copC|tr|F4ZBX9|F4ZBX9\_XANCI CopC OS=Xanthomonas citri subsp. citri GN=copC PE=4 SV=1

BAC0266|ncrY|tr|Q06VT0|Q06VT0\_9BACT NcrY OS=Leptospirillum ferriphilum GN=ncrY PE=4 SV=1

BAC0584|arsC|sp|O50595|ARSC\_ACIMA Arsenate reductase OS=Acidiphilium multivorum (strain DSM 11245) GN=arsC PE=4 SV=1

BAC0112|cusS|sp|P77485|CUSS\_ECOLI Sensor kinase CusS OS=Escherichia coli (strain K12) GN=cusS PE=1 SV=1

BAC0265|ncrC|tr|D5CKG5|D5CKG5\_ENTCC Nickel-resistant membrane protein-like protein NcrC OS=Enterobacteriaceae GN=ncrC PE=4 SV=1

BAC0447|yjaA|sp|P09162|YJAA\_ECOLI Uncharacterized protein YjaA OS=Escherichia coli (strain K12) GN=yjaA PE=4 SV=1

BAC0683|merR1|tr|O07300|O07300\_9PSED Mercuric resistance operon regulatory protein OS=Pseudomonas sp. K-62 GN=merR1 PE=4 SV=1

BAC0102|cueA|tr|Q8KWW2|Q8KWW2\_PSEPU Copper transporter OS=Pseudomonas putida GN=cueA PE=3 SV=1

BAC0071|cmtR|sp|P67731|CMTR\_MYCTU HTH-type transcriptional regulator CmtR OS=Mycobacterium tuberculosis GN=cmtR PE=4 SV=1

BAC0630|copC|sp|P12376|COPC\_PSEUB Copper resistance protein C OS=Pseudomonas syringae pv. tomato GN=copC PE=4 SV=1

BAC0113|cutA|sp|P69488|CUTA\_ECOLI Divalent-cation tolerance protein CutA OS=Escherichia coli (strain K12) GN=cutA PE=4 SV=1

BAC0169|fpvA|sp|P48632|FPVA\_PSEAE Ferripyoverdine receptor OS=Pseudomonas aeruginosa (strain ATCC 27819) GN=fpvA PE=4 SV=1

BAC0138|dsbC|sp|P0AEG6|DSBC\_ECOLI Thiol:disulfide interchange protein DsbC OS=Escherichia coli (strain K12) GN=dsbC PE=4 SV=1

BAC0670|merE|tr|Q52104|Q52104\_9ZZZZ Uncharacterized protein OS=Plasmid pDU1358 PE=4 SV=1

BAC0077|copA|sp|P12374|COPA\_PSEUB Copper resistance protein A OS=Pseudomonas syringae pv. tomato GN=copA PE=4 SV=1

BAC0490|G2alt|tr|B0FSM1|B0FSM1\_9BACI 7-cyano-7-deazaguanine synthase OS=Anoxybacillus gonensis GN=G2alt PE=4 SV=1

BAC0087|mgtA|sp|P0ABB8|ATMA\_ECOLI Magnesium-transporting ATPase, P-type 1 OS=Escherichia coli (strain K12) GN=mgtA PE=4 SV=1

BAC0684|merR2|tr|Q7DKL2|Q7DKL2\_9PSED MerR2 OS=Pseudomonas sp. K-62 GN=merR2 PE=4 SV=1

BAC0694|merT-P|tr|H6WCN3|H6WCN3\_9FLAO MerT-P OS=Tenacibaculum discolor GN=merT-P PE=4 SV=1

BAC0652|merA|tr|O66017|O66017\_PSEST MerA OS=Pseudomonas stutzeri GN=merA PE=4 SV=1

BAC0082|copL|tr|Q5YKV8|Q5YKV8\_9XANT CopL OS=Xanthomonas perforans GN=copL PE=4 SV=1

BAC0391|terW|sp|P75010|TERW\_SERMA Tellurium resistance protein TerW OS=Serratia marcescens GN=terW PE=4 SV=1

BAC0467|zraR|hydH|sp|P14375|ZRAR\_ECOLI Transcriptional regulatory protein ZraR OS=Escherichia coli (strain K12) GN=zraR PE=4 SV=1

BAC0224|merA|sp|P16171|MERA\_BACCE Mercuric reductase OS=Bacillus cereus GN=merA PE=1 SV=1

BAC0056|cadC|sp|P20047|CADC\_STAAU Cadmium resistance transcriptional regulatory protein CadC OS=Staphylococcus aureus GN=cadC PE=4 SV=1

BAC0027|chrB|tr|A4UQR5|A4UQR5\_9RHIZ ChrB OS=Ochrobactrum tritici GN=chrB PE=4 SV=1

BAC0568|actP|sp|Q9X5V3|ATCU\_RHILV Copper-transporting P-type ATPase OS=Rhizobium leguminosarum GN=actP PE=4 SV=1

BAC0276|nirA|tr|Q6RUG3|Q6RUG3\_KLEOX NirA OS=Klebsiella oxytoca GN=nirA PE=4 SV=1

BAC0079|copB|sp|P05425|COPB\_ENTHA Copper-exporting P-type ATPase B OS=Enterococcus hirae (strain ATCC 29512) GN=copB PE=4 SV=1

BAC0576|arsB|sp|P52146|ARSB2\_ECOLX Arsenical pump membrane protein OS=Escherichia coli GN=arsB PE=4 SV=1

BAC0646|mdtB|tr|D0ZND9|D0ZND9\_SALT1 Multidrug resistance protein MdtB OS=Salmonella typhimurium GN=mdtB PE=4 SV=1

BAC0103|cueO|sp|P36649|CUEO\_ECOLI Blue copper oxidase CueO OS=Escherichia coli (strain K12) GN=cueO PE=3 SV=1

BAC0040|baeS|sp|P30847|BAES\_ECOLI Signal transduction histidine-protein kinase BaeS OS=Escherichia coli (strain K12) GN=baeS PE=4 SV=1

BAC0026|chrA|tr|A4UQR4|A4UQR4\_9RHIZ Chromate transporter OS=Ochrobactrum tritici GN=chrA PE=4 SV=1

BAC0571|arsA|sp|O50593|ARSA\_ACIMA Arsenical pump-driving ATPase OS=Acidiphilium multivorum (strain K12)  
 BAC0137|dsbB|sp|P0A6M2|DSBB\_ECOLI Disulfide bond formation protein B OS=Escherichia coli (strain K12)  
 BAC0668|merD|tr|Q5NUV1|Q5NUV1\_RALME MerD from Tn4378, regulatory protein involved in Hg(II) resistance  
 BAC0691|merT|tr|Q52397|Q52397\_PSEST Mercury transport protein OS=Pseudomonas stutzeri GN=merT PE=4 SV=1  
 BAC0341|silA|sp|Q9ZHC9|SILA\_SALTM Putative cation efflux system protein SilA OS=Salmonella typhimurium  
 BAC0368|sodA|sp|P00448|SODM\_ECOLI Superoxide dismutase [Mn] OS=Escherichia coli (strain K12) GN=sodA  
 BAC0383|tcrB|tr|Q8VPE6|Q8VPE6\_ENTFC TcrB OS=Enterococcus faecium GN=tcrB PE=3 SV=1  
 BAC0031|arsB|sp|P08691|ARSB1\_ECOLX Arsenical pump membrane protein OS=Escherichia coli GN=arsB PE=4 SV=1  
 BAC0252|mntP|yebN|sp|P76264|MNTP\_ECOLI Probable manganese efflux pump MntP OS=Escherichia coli (strain K12)  
 BAC0305|pcoC|sp|Q47454|PCOC\_ECOLX Copper resistance protein C OS=Escherichia coli GN=pcoC PE=1 SV=1  
 BAC0678|merP|tr|O66016|O66016\_PSEST MerP OS=Pseudomonas stutzeri GN=merP PE=4 SV=1  
 BAC0092|corT|coaT|tr|H0P0Y3|H0P0Y3\_9SYNC Cation-transporting ATPase E1-E2 ATPase OS=Synechocystis sp. PCC 6803  
 BAC0538|chrR|tr|Q7BD45|Q7BD45\_PSEPU Chromate reductase OS=Pseudomonas putida GN=chrR PE=4 SV=1  
 BAC0035|arsM|tr|Q6N3Y0|Q6N3Y0\_RHOPA UbiE/COQ5 methyltransferase OS=Rhodopseudomonas palustris  
 BAC0285|nreB|tr|F0KND8|F0KND8\_ACICP NrsD, nreB nickel permease involved in nickel and cobalt tolerance  
 BAC0673|merE|sp|P06690|MERE\_PSEAI Uncharacterized mercuric resistance protein MerE OS=Pseudomonas stutzeri  
 BAC0666|merD|tr|O66018|O66018\_PSEST MerD OS=Pseudomonas stutzeri GN=merD PE=4 SV=1  
 BAC0651|merA|sp|P0A0E5|MERA\_STAAU Mercuric reductase OS=Staphylococcus aureus GN=merA PE=3 SV=1  
 BAC0101|ctpV|sp|P77894|CTPV\_MYCTU Probable copper-exporting P-type ATPase V OS=Mycobacterium tuberculosis  
 BAC0390|terE|sp|P18782|TERE\_ALCSP Tellurium resistance protein TerE OS=Alcaligenes sp. GN=terE PE=3 SV=1  
 BAC0355|ruvB|sp|Q51426|RUVB\_PSEAE Holliday junction ATP-dependent DNA helicase RuvB OS=Pseudomonas putida  
 BAC0316|pstB|sp|P0AAH0|PSTB\_ECOLI Phosphate import ATP-binding protein PstB OS=Escherichia coli (strain K12)  
 BAC0587|arsD|sp|P52148|ARSD2\_ECOLX Arsenical resistance operon trans-acting repressor ArsD OS=Escherichia coli  
 BAC0434|ychH|sp|P0AB49|YCHH\_ECOLI Uncharacterized protein YchH OS=Escherichia coli (strain K12) GN=ychH  
 BAC0549|nccA|sp|Q44586|NCCA\_ALCXX Nickel-cobalt-cadmium resistance protein NccA OS=Alcaligenes xylosoxydans  
 BAC0032|arsC|sp|P0A006|ARSC\_STAAU Protein ArsC OS=Staphylococcus aureus GN=arsC PE=1 SV=1  
 BAC0099|ctpD|sp|A0R3A7|CTPD\_MYCS2 Probable cobalt/nickel-exporting P-type ATPase OS=Mycobacterium tuberculosis  
 BAC0498|ideR|sp|P0A672|IDER\_MYCTU Iron-dependent repressor IdeR OS=Mycobacterium tuberculosis GN=ideR  
 BAC0330|rcnA|yohM|sp|P76425|RCNA\_ECOLI Nickel/cobalt efflux system RcnA OS=Escherichia coli (strain K12)  
 BAC0302|pbrT|tr|Q5GR69|Q5GR69\_ALCXX Lead uptake protein PbrT OS=Alcaligenes xylosoxydans xylosoxydans  
 BAC0608|modE|sp|P0A9G8|MODE\_ECOLI Transcriptional regulator ModE OS=Escherichia coli (strain K12) GN=modE  
 BAC0679|merP|tr|O66047|O66047\_PSEST Mercury transport protein OS=Pseudomonas stutzeri GN=merP PE=4 SV=1  
 BAC0470|zur|yjbK|sp|P0AC51|ZUR\_ECOLI Zinc uptake regulation protein OS=Escherichia coli (strain K12) GN=zur  
 BAC0573|arsB|sp|P45946|ARSB\_BACSU Arsenite resistance protein ArsB OS=Bacillus subtilis (strain 168) GN=arsB  
 BAC0255|mreA|tr|Q88IN0|Q88IN0\_PSEPK Putative uncharacterized protein OS=Pseudomonas putida (strain KT)  
 BAC0022|aioR|aoxR|tr|Q2VGB1|Q2VGB1\_RHIRD Putative transcriptional regulator OS=Rhizobium radiobacter  
 BAC0299|pbrB|pbrC|tr|Q58AJ7|Q58AJ7\_RALME Lipoprotein signal peptidase OS=Ralstonia metallidurans (strain K12)  
 BAC0621|copA|tr|F4ZBX3|F4ZBX3\_XANCI CopA OS=Xanthomonas citri subsp. citri GN=copA PE=4 SV=1  
 BAC0273|nikD|sp|P33593|NIKD\_ECOLI Nickel import ATP-binding protein NikD OS=Escherichia coli (strain K12)  
 BAC0076|comR|ycfQ|sp|P75952|COMR\_ECOLI HTH-type transcriptional repressor ComR OS=Escherichia coli (strain K12)  
 BAC0204|cnrB|sp|P37973|CNRB\_RALME Nickel and cobalt resistance protein CnrB OS=Ralstonia metallidurans  
 BAC0626|copB|sp|P12375|COPB\_PSEUB Copper resistance protein B OS=Pseudomonas syringae pv. tomato GN=copB  
 BAC0012|actP|sp|Q9X5X3|ATCU\_SINMW Copper-transporting P-type ATPase OS=Sinorhizobium medicae (strain K12)  
 BAC0541|yieF|sp|P0AGE6|YIEF\_ECOLI Uncharacterized protein YieF OS=Escherichia coli (strain K12) GN=yieF  
 BAC0385|tehB|sp|P25397|TEHB\_ECOLI Tellurite methyltransferase OS=Escherichia coli (strain K12) GN=tehB  
 BAC0645|mdtA|tr|D0ZND8|D0ZND8\_SALT1 Multidrug resistance protein MdtA OS=Salmonella typhimurium

BAC0439|yfeA|sp|Q56952|YFEA\_YERPE Periplasmic chelated iron-binding protein YfeA OS=Yersinia pestis GN=yfeA PE=4 SV=1

BAC0228|merF|tr|Q2QCN0|Q2QCN0\_9PSED MerF OS=Pseudomonas sp. CT14 GN=merF PE=4 SV=1

BAC0489|ALU1-P|tr|O52119|O52119\_ARTVI Aluminum resistance protein (Fragment) OS=Arthrobacter viscosus GN=ALU1-P PE=4 SV=1

BAC0572|arsA|sp|P08690|ARSA1\_ECOLX Arsenical pump-driving ATPase OS=Escherichia coli GN=arsA PE=4 SV=1

BAC0084|copY|tr|Y|sp|Q47839|COPY\_ENTHA Transcriptional repressor CopY OS=Enterococcus hirae (strain ATCC 29542) GN=copY PE=4 SV=1

BAC0433|ybtQ|tr|Q9Z375|Q9Z375\_YERPE Inner membrane ABC-transporter YbtQ OS=Yersinia pestis GN=ybtQ PE=4 SV=1

BAC0334|robA|sp|P0ACI0|ROB\_ECOLI Right origin-binding protein OS=Escherichia coli (strain K12) GN=robA PE=4 SV=1

BAC0627|copB|tr|F4ZD00|F4ZD00\_9XANT Copper resistance protein B OS=Xanthomonas alfalfae subsp. citri GN=copB PE=4 SV=1

BAC0263|ncrA|tr|Q06VT3|Q06VT3\_9BACT NcrA OS=Leptospirillum ferriphilum GN=ncrA PE=4 SV=1

BAC0594|arsR|sp|P37309|ARSR\_ECOLI Arsenical resistance operon repressor OS=Escherichia coli (strain K12) GN=arsR PE=4 SV=1

BAC0136|dsbA|sp|P0AEG4|DSBA\_ECOLI Thiol:disulfide interchange protein DsbA OS=Escherichia coli (strain K12) GN=dsbA PE=4 SV=1

BAC0589|arsR|sp|P15905|ARSR1\_ECOLX Arsenical resistance operon repressor OS=Escherichia coli GN=arsR PE=4 SV=1

BAC0171|furA|sp|P0A582|FURA\_MYCTU Transcriptional regulator FurA OS=Mycobacterium tuberculosis GN=furA PE=4 SV=1

BAC0267|nczA|tr|B8GZE9|B8GZE9\_CAUCN Cobalt-zinc-cadmium resistance protein czcA OS=Caulobacter crescentus GN=nczA PE=4 SV=1

BAC0270|nikA|sp|P33590|NIKA\_ECOLI Nickel-binding periplasmic protein OS=Escherichia coli (strain K12) GN=nikA PE=4 SV=1

BAC0638|copR|tr|C6FFR4|C6FFR4\_PSEFL CopR OS=Pseudomonas fluorescens GN=copR PE=4 SV=1

BAC0315|pstA|sp|P07654|PSTA\_ECOLI Phosphate transport system permease protein PstA OS=Escherichia coli (strain K12) GN=pstA PE=4 SV=1

BAC0303|pcoA|sp|Q47452|PCOA\_ECOLX Copper resistance protein A OS=Escherichia coli GN=pcoA PE=3 SV=1

BAC0445|ygiW|sp|P0ADU5|YGIW\_ECOLI Protein YgiW OS=Escherichia coli (strain K12) GN=ygiW PE=1 SV=1

BAC0628|copB|tr|F4ZBX4|F4ZBX4\_XANCI CopB OS=Xanthomonas citri subsp. citri GN=copB PE=4 SV=1

BAC0629|copB|sp|O30085|COPB\_ARCFU Copper-exporting P-type ATPase B OS=Archaeoglobus fulgidus (strain ATCC 49614) GN=copB PE=4 SV=1

BAC0695|merT|sp|P13112|MERT\_SERMA Mercuric transport protein OS=Serratia marcescens GN=merT PE=4 SV=1

BAC0588|arsR|tr|P74986|P74986\_YEREN Arsenite inducible repressor OS=Yersinia enterocolitica GN=arsR PE=4 SV=1

BAC0452|yqjH|sp|Q46871|YQJH\_ECOLI NADPH-dependent ferric-chelate reductase OS=Escherichia coli (strain K12) GN=yqjH PE=4 SV=1

BAC0612|perO|tr|D5AQ60|D5AQ60\_RHO�CB Divalent ion symporter OS=Rhodobacter capsulatus (strain ATCC 49619) GN=perO PE=4 SV=1

BAC0682|merR1|sp|P22853|MERR\_BACCE Mercuric resistance operon regulatory protein OS=Bacillus cereus GN=merR1 PE=4 SV=1

BAC0181|glpF|sp|P0AER0|GLPF\_ECOLI Glycerol uptake facilitator protein OS=Escherichia coli (strain K12) GN=glpF PE=4 SV=1

BAC0570|actP|tr|D5AU53|D5AU53\_RHO�CB Cation/acetate symporter ActP-1 OS=Rhodobacter capsulatus (strain ATCC 49619) GN=actP PE=4 SV=1

BAC0441|yfeC|sp|Q56954|YFEC\_YERPE Chelated iron transport system membrane protein YfeC OS=Yersinia pestis GN=yfeC PE=4 SV=1

BAC0384|tehA|sp|P25396|TEHA\_ECOLI Tellurite resistance protein TehA OS=Escherichia coli (strain K12) GN=tehA PE=4 SV=1

BAC0306|pcoD|sp|Q47455|PCOD\_ECOLX Copper resistance protein D OS=Escherichia coli GN=pcoD PE=3 SV=1

BAC0089|corR|tr|Q1D6V8|Q1D6V8\_MYXXD Sigma-54 dependent DNA-binding response regulator OS=Myxococcus xanthus GN=corR PE=4 SV=1

BAC0133|dnaK|sp|P0A5B9|DNAK\_MYCTU Chaperone protein DnaK OS=Mycobacterium tuberculosis GN=dnaK PE=4 SV=1

BAC0692|merT|tr|Q79BG6|Q79BG6\_PSEST MerT OS=Pseudomonas stutzeri GN=merT PE=4 SV=1

BAC0350|sitB|tr|Q9XCS1|Q9XCS1\_SALTM SitB OS=Salmonella typhimurium GN=sitB PE=3 SV=1

BAC0254|mrdH|tr|Q88IN1|Q88IN1\_PSEPK Membrane protein, putative OS=Pseudomonas putida (strain KT244) GN=mrdH PE=4 SV=1

BAC0110|cusF|cusX|sp|P77214|CUSF\_ECOLI Cation efflux system protein CusF OS=Escherichia coli (strain K12) GN=cusF PE=4 SV=1

BAC0637|copS|tr|C6FFR5|C6FFR5\_PSEFL CopS OS=Pseudomonas fluorescens GN=copS PE=4 SV=1

BAC0597|baeS|tr|D0ZNE2|D0ZNE2\_SALT1 Signal transduction histidine-protein kinase BaeS OS=Salmonella typhimurium GN=baeS PE=4 SV=1

BAC0685|merR|tr|H6WCN2|H6WCN2\_9FLAO MerR OS=Tenacibaculum discolor GN=merR PE=4 SV=1

BAC0063|chrA|sp|P14285|CHRA\_PSEAI Chromate transport protein OS=Pseudomonas aeruginosa GN=chrA PE=4 SV=1

BAC0272|nikC|sp|P0AFA9|NIKC\_ECOLI Nickel transport system permease protein NikC OS=Escherichia coli (strain K12) GN=nikC PE=4 SV=1

BAC0231|merP|sp|P13113|MERP\_SERMA Mercuric transport protein periplasmic component OS=Serratia marcescens GN=merP PE=4 SV=1

BAC0676|merP|tr|Q7DHE4|Q7DHE4\_BACCE Mercury-binding protein OS=Bacillus cereus GN=merP PE=4 SV=1

BAC0122|czcD|sp|P13512|CZCD\_RALME Cobalt-zinc-cadmium resistance protein CzcD OS=Ralstonia metallum GN=czcD PE=4 SV=1

BAC0033|arsD|sp|P46003|ARSD1\_ECOLX Arsenical resistance operon trans-acting repressor ArsD OS=Escherichia coli GN=arsD PE=4 SV=1

BAC0111|cusR|ylcA|sp|P0ACZ8|CUSR\_ECOLI Transcriptional regulatory protein CusR OS=Escherichia coli (strain K12) GN=cusR PE=3 SV=1

BAC0347|silR|sp|Q9ZHD3|SILR\_SALTM Probable transcriptional regulatory protein SilR OS=Salmonella typhimurium GN=silR PE=3 SV=1

BAC0116|cutF|nlpE|sp|P40710|NLPE\_ECOLI Lipoprotein NlpE OS=Escherichia coli (strain K12) GN=nlpE PE=3 SV=1

BAC0563|acrD|tr|Q8ZN77|Q8ZN77\_SALTY RND family aminoglycoside/multidrug efflux pump OS=Salmonella typhimurium GN=acrD PE=3 SV=1

BAC0199|klaB|telA|kilB|sp|Q52328|KLAB\_ECOLX Protein KlaB OS=Escherichia coli GN=klaB PE=3 SV=1

BAC0086|corA|sp|P0ABI4|CORA\_ECOLI Magnesium transport protein CorA OS=Escherichia coli (strain K12) GN=corA PE=3 SV=1

BAC0688|merR2|tr|Q79B70|Q79B70\_PSEST Organomercurial resistance regulatory protein OS=Pseudomonas sp. K-62 GN=merR2 PE=3 SV=1

BAC0100|ctpG|sp|P63689|CTPG\_MYCTU Probable cation-transporting ATPase G OS=Mycobacterium tuberculosis H37Rv GN=ctpG PE=3 SV=1

BAC0649|merA|tr|E3VST6|E3VST6\_9FLAO MerA OS=Tenacibaculum discolor GN=merA PE=3 SV=1

BAC0700|ncrC|tr|Q1KLR0|Q1KLR0\_SERMA NcrC OS=Serratia marcescens GN=ncrC PE=4 SV=1

BAC0331|rcnB|yohN|sp|P64534|RCNB\_ECOLI Nickel/cobalt homeostasis protein RcnB OS=Escherichia coli (strain K12) GN=rcnB PE=3 SV=1

BAC0274|nikE|sp|P33594|NIKE\_ECOLI Nickel import ATP-binding protein NikE OS=Escherichia coli (strain K12) GN=nikE PE=3 SV=1

BAC0049|bhsA|ycfR|comC|sp|P0AB40|BHSA\_ECOLI Multiple stress resistance protein BhsA OS=Escherichia coli (strain K12) GN=bhsA PE=3 SV=1

BAC0387|terB|sp|P18779|TERB\_ALCSP Tellurium resistance protein TerB OS=Alcaligenes sp. GN=terB PE=4 SV=1

BAC0298|pbrA|tr|Q58AJ6|Q58AJ6\_RALME P-type ATPase involved in Pb(II) resistance PbrA OS=Ralstonia metallidurans (strain CH) GN=pbrA PE=3 SV=1

BAC0388|terC|sp|P18780|TERC\_ALCSP Tellurium resistance protein TerC OS=Alcaligenes sp. GN=terC PE=3 SV=1

BAC0088|corC|sp|P0A2L3|CORC\_SALTY Magnesium and cobalt efflux protein CorC OS=Salmonella typhimurium GN=corC PE=3 SV=1

BAC0152|srpC|sp|Q55027|SRPC\_SYNE7 Probable chromate transport protein OS=Synechococcus elongatus (strain PCC 6803) GN=srpC PE=3 SV=1

BAC0591|arsR|sp|P52144|ARSR2\_ECOLX Arsenical resistance operon repressor OS=Escherichia coli GN=arsR PE=3 SV=1

BAC0066|chrF|tr|Q5NUZ7|Q5NUZ7\_RALME ChrF, regulatory protein, involved in Chromate resistance OS=Ralstonia metallidurans (strain CH) GN=chrF PE=3 SV=1

BAC0163|fecD|sp|P15029|FECD\_ECOLI Fe(3+) dicitrate transport system permease protein FecD OS=Escherichia coli (strain K12) GN=fecD PE=3 SV=1

BAC0693|merT|tr|Q79F00|Q79F00\_9PSED Mercuric transport protein OS=Pseudomonas sp. K-62 GN=merT PE=3 SV=1

BAC0057|cadD|tr|Q7A320|Q7A320\_STAAN CadD OS=Staphylococcus aureus (strain N315) GN=cadD PE=4 SV=1

BAC0578|arsB|tr|O50594|O50594\_ACIMU ArsB OS=Acidiphilium multivorum GN=arsB PE=4 SV=1

BAC0566|actS|tr|Q52912|Q52912\_9RHIZ Histidine protein kinase OS=Sinorhizobium medicae GN=actS PE=4 SV=1

BAC0342|silB|sp|Q9ZHD0|SILB\_SALTM Putative membrane fusion protein SilB OS=Salmonella typhimurium GN=silB PE=3 SV=1

BAC0464|znuB|yebI|sp|P39832|ZNUB\_ECOLI High-affinity zinc uptake system membrane protein ZnuB OS=Escherichia coli (strain K12) GN=znuB PE=3 SV=1

BAC0346|silP|sp|Q9ZHC7|SILP\_SALTM Silver exporting P-type ATPase OS=Salmonella typhimurium GN=silP PE=3 SV=1

BAC0240|mexI|tr|Q9HWH4|Q9HWH4\_PSEAE Probable Resistance-Nodulation-Cell Division (RND) efflux transporter OS=Escherichia coli (strain K12) GN=mexI PE=3 SV=1

BAC0548|chrA1|sp|P17551|CHRA1\_RALME Chromate transport protein OS=Ralstonia metallidurans (strain CH) GN=chrA1 PE=3 SV=1

BAC0609|modA|sp|P37329|MODA\_ECOLI Molybdate-binding periplasmic protein OS=Escherichia coli (strain K12) GN=modA PE=3 SV=1

BAC0698|ncrA|tr|Q1KLR2|Q1KLR2\_SERMA NcrA OS=Serratia marcescens GN=ncrA PE=4 SV=1

BAC0643|corB|tr|Q9X621|Q9X621\_SALTM CorB OS=Salmonella typhimurium GN=corB PE=4 SV=1

BAC0639|copC|tr|C6FFR6|C6FFR6\_PSEFL CopC OS=Pseudomonas fluorescens GN=copC PE=4 SV=1

BAC0611|modC|sp|P09833|MODC\_ECOLI Molybdenum import ATP-binding protein ModC OS=Escherichia coli (strain K12) GN=modC PE=3 SV=1

BAC0565|actR|sp|A6UEL7|ACTR\_SINMW Acid tolerance regulatory protein ActR OS=Sinorhizobium medicae GN=actR PE=3 SV=1

BAC0229|merG|tr|O07302|O07302\_9PSED Mercuric resistance protein OS=Pseudomonas sp. K-62 GN=merG PE=3 SV=1

BAC0028|chrC|tr|A4UQR3|A4UQR3\_9RHIZ Superoxide dismutase OS=Ochrobactrum tritici GN=chrC PE=3 SV=1

BAC0468|zraS|hydG|sp|P14377|ZRAS\_ECOLI Sensor protein ZraS OS=Escherichia coli (strain K12) GN=zraS PE=3 SV=1

BAC0345|silF|tr|Q9ZHD1|Q9ZHD1\_SALTM Uncharacterized protein OS=Salmonella typhimurium GN=ORF96 GN=silF PE=3 SV=1

BAC0665|merD|tr|O66022|O66022\_PSEST Mercury operon coregulator protein OS=Pseudomonas stutzeri GN=merD PE=3 SV=1

BAC0114|cutC|sp|P67826|CUTC\_ECOLI Copper homeostasis protein CutC OS=Escherichia coli (strain K12) GN=cutC PE=3 SV=1

BAC0233|merT|sp|P94185|MERT\_ALCSP Mercuric transport protein OS=Alcaligenes sp. GN=merT PE=3 SV=1

BAC0059|cadX|tr|A7LHQ4|A7LHQ4\_STRSL CadX OS=Streptococcus salivarius GN=cadX PE=4 SV=1

BAC0461|zntA|yhhO|sp|P37617|ATZN\_ECOLI Lead, cadmium, zinc and mercury-transporting ATPase OS=Escherichia coli (strain K12) GN=zntA PE=3 SV=1

BAC0048|bfrA|sp|P63697|BFR\_MYCTU Bacterioferritin OS=Mycobacterium tuberculosis H37Rv GN=bfrA PE=1 SV=1

BAC0312|pitA|sp|P0AFJ7|PITA\_ECOLI Low-affinity inorganic phosphate transporter 1 OS=Escherichia coli (strain K12) GN=pitA PE=4 SV=1

BAC0458|zipB|tr|Q7WJT8|Q7WJT8\_BORBR Putative membrane protein OS=Bordetella bronchiseptica (strain ATCC 35061) GN=zipB PE=4 SV=1

BAC0553|nccX|sp|Q44582|NCCX\_ALCXX Nickel-cobalt-cadmium resistance protein NccX OS=Alcaligenes xylosoxidans GN=nccX PE=4 SV=1

BAC0699|ncrB|tr|Q1KLR1|Q1KLR1\_SERMA NcrB OS=Serratia marcescens GN=ncrB PE=4 SV=1

BAC0120|czcB|sp|P13510|CZCB\_RALME Cobalt-zinc-cadmium resistance protein CzcB OS=Ralstonia metallidurans GN=czcB PE=4 SV=1

BAC0275|nikR|sp|P0A6Z6|NIKR\_ECOLI Nickel-responsive regulator OS=Escherichia coli (strain K12) GN=nikR PE=4 SV=1

BAC0690|merT|tr|Q934S7|Q934S7\_THIFE Mercuric ion transport protein OS=Thiobacillus ferrooxidans GN=merT PE=4 SV=1

BAC0457|zinT|yodA|sp|P76344|ZINT\_ECOLI Metal-binding protein ZinT OS=Escherichia coli (strain K12) GN=zinT PE=4 SV=1

BAC0599|modB|tr|Q72FN2|Q72FN2\_DESVH Molybdenum ABC transporter, permease protein OS=Desulfovibrio desulfurans GN=modB PE=4 SV=1

BAC0083|copR|sp|Q02540|COPR\_PSEUB Transcriptional activator protein CopR OS=Pseudomonas syringae pv. tomato GN=copR PE=4 SV=1

BAC0642|mgtA|sp|P36640|ATMA\_SALTY Magnesium-transporting ATPase, P-type 1 OS=Salmonella typhimurium GN=mgtA PE=4 SV=1

BAC0648|merA|sp|P08662|MERA\_SERMA Mercuric reductase (Fragments) OS=Serratia marcescens GN=merA PE=4 SV=1

BAC0664|merC|tr|O66048|O66048\_PSEST MerC OS=Pseudomonas stutzeri GN=merC PE=4 SV=1

BAC0389|terD|sp|P18781|TERD\_ALCSP Tellurium resistance protein TerD OS=Alcaligenes sp. GN=terD PE=3 SV=1

BAC0115|cutE|lnt|sp|P23930|LNT\_ECOLI Apolipoprotein N-acyltransferase OS=Escherichia coli (strain K12) GN=cutE PE=4 SV=1

BAC0308|pcoR|sp|Q47456|PCOR\_ECOLX Transcriptional regulatory protein PcoR OS=Escherichia coli GN=pcoR PE=4 SV=1

BAC0106|cuiD|sp|Q8ZRS2|CUEO\_SALTY Blue copper oxidase CueO OS=Salmonella typhimurium (strain LT2) GN=cuiD PE=4 SV=1

BAC0583|arsC|sp|P52147|ARSC2\_ECOLX Arsenate reductase OS=Escherichia coli GN=arsC PE=3 SV=1

BAC0446|yhcN|sp|P64614|YHCN\_ECOLI Uncharacterized protein YhcN OS=Escherichia coli (strain K12) GN=yhcN PE=4 SV=1

BAC0469|zupT|ygiE|sp|P0A8H3|ZUPT\_ECOLI Zinc transporter ZupT OS=Escherichia coli (strain K12) GN=zupT PE=4 SV=1

BAC0253|mntR|sp|P0A9F1|MNTR\_ECOLI Transcriptional regulator MntR OS=Escherichia coli (strain K12) GN=mntR PE=4 SV=1

BAC0459|zitB|ybgR|sp|P75757|ZITB\_ECOLI Zinc transporter ZitB OS=Escherichia coli (strain K12) GN=zitB PE=4 SV=1

BAC0098|ctpC|sp|P0A502|CTPC\_MYCTU Probable manganese/zinc-exporting P-type ATPase OS=Mycobacterium tuberculosis H37Rv GN=ctpC PE=4 SV=1

BAC0640|copD|tr|C6FFR7|C6FFR7\_PSEFL CopD OS=Pseudomonas fluorescens GN=copD PE=4 SV=1

BAC0582|arsC|sp|P08692|ARSC1\_ECOLX Arsenate reductase OS=Escherichia coli GN=arsC PE=1 SV=1

BAC0659|merB|sp|P08664|MERB\_SERMA Alkylmercury lyase OS=Serratia marcescens GN=merB PE=3 SV=1

BAC0164|fecE|sp|P15031|FECE\_ECOLI Fe(3+) dicitrate transport ATP-binding protein FecE OS=Escherichia coli (strain K12) GN=fecE PE=4 SV=1

BAC0264|ncrB|tr|Q06VT2|Q06VT2\_9BACT NcrB OS=Leptospirillum ferriphilum GN=ncrB PE=4 SV=1

BAC0182|golS|tr|Q8ZRG6|Q8ZRG6\_SALTY Putative transcriptional regulator OS=Salmonella typhimurium (strain LT2) GN=golS PE=4 SV=1

BAC0707|sodB|sp|P0AGD3|SODF\_ECOLI Superoxide dismutase [Fe] OS=Escherichia coli (strain K12) GN=sodB PE=4 SV=1

BAC0003|acn|tr|O53166|O53166\_MYCTU Aconitate hydratase OS=Mycobacterium tuberculosis H37Rv GN=acn PE=4 SV=1

BAC0161|fbpB|sp|P71338|FBPB2\_HAEIN Fe(3+)-transport system permease protein FbpB 2 OS=Haemophilus influenzae GN=fbpB PE=4 SV=1

BAC0317|pstC|sp|P0AGH8|PSTC\_ECOLI Phosphate transport system permease protein PstC OS=Escherichia coli (strain K12) GN=pstC PE=4 SV=1

BAC0352|sitD|tr|Q9XCR9|Q9XCR9\_SALTM SitD OS=Salmonella typhimurium GN=sitD PE=3 SV=1

BAC0585|arsC|sp|P74984|ARSC\_YEREN Arsenate reductase OS=Yersinia enterocolitica GN=arsC PE=3 SV=1

BAC0203|cnrA|sp|P37972|CNRA\_RALME Nickel and cobalt resistance protein CnrA OS=Ralstonia metallidurans GN=cnrA PE=4 SV=1

BAC0034|arsH|tr|E8PS81|E8PS81\_YERPE Arsenic resistance protein ArsH OS=Yersinia pestis Java 9 GN=arsH PE=4 SV=1

BAC0432|ybtP|tr|Q9R7V3|Q9R7V3\_YERPE Lipoprotein inner membrane ABC-transporter OS=Yersinia pestis COGNATE GN=ybtP PE=4 SV=1

BAC0540|nfsA|sp|P17117|NFSA\_ECOLI Oxygen-insensitive NADPH nitroreductase OS=Escherichia coli (strain K12) GN=nfsA PE=4 SV=1

BAC0030|arsA|sp|P52145|ARSA2\_ECOLX Arsenical pump-driving ATPase OS=Escherichia coli GN=arsA PE=4 SV=1

BAC0166|fetB|ybbM|sp|P77307|YBBM\_ECOLI UPF0014 inner membrane protein YbbM OS=Escherichia coli (strain K12) GN=fetB PE=4 SV=1

BAC0358|oscA|tr|B6CM35|B6CM35\_9PSED Putative uncharacterized protein oscA OS=Pseudomonas corrugata GN=oscA PE=4 SV=1

BAC0250|mntA|ytgA|sp|O34385|MNTA\_BACSU Manganese-binding lipoprotein MntA OS=Bacillus subtilis (strain 168) GN=mntA PE=4 SV=1

BAC0332|rcnR|yohL|sp|P64530|RCNR\_ECOLI Transcriptional repressor RcnR OS=Escherichia coli (strain K12) GN=rcnR PE=4 SV=1

BAC0293|ruvB|tr|B5L348|B5L348\_9PSED Malic enzyme family protein (Fragment) OS=Pseudomonas corrugata GN=ruvB PE=4 SV=1

BAC0105|cueR|ybbI|sp|P0A9G4|CUER\_ECOLI HTH-type transcriptional regulator CueR OS=Escherichia coli (strain K12) GN=cueR PE=4 SV=1

BAC0183|golT|tr|Q8ZRG7|Q8ZRG7\_SALTY Putative cation transport ATPase OS=Salmonella typhimurium (strain LT2 / SGSC1412) GN=golT PE=4 SV=1

BAC0455|ziaA|sp|Q59998|ATZN\_SYNY3 Zinc-transporting ATPase OS=Synechocystis sp. (strain PCC 6803 / FACHS-1) GN=ziaA PE=4 SV=1

BAC0058|cadR|tr|Q93TP7|Q93TP7\_PSEPU CadR OS=Pseudomonas putida GN=cadR PE=4 SV=1

BAC0357|recG|tr|B5L350|B5L350\_9PSED ATP-dependent DNA helicase (Fragment) OS=Pseudomonas corrugata GN=recG PE=4 SV=1

BAC0271|nikB|sp|P33591|NIKB\_ECOLI Nickel transport system permease protein NikB OS=Escherichia coli (strain K12) GN=nikB PE=4 SV=1

BAC0167|fieF/yiip|sp|P69380|FIEF\_ECOLI Ferrous-iron efflux pump FieF OS=Escherichia coli (strain K12) GN=fieF PE=4 SV=1

BAC0130|cztA|tr|Q9RLI8|Q9RLI8\_PSEAI CztA protein OS=Pseudomonas aeruginosa GN=cztA PE=4 SV=1

BAC0650|merA|tr|O08449|O08449\_9PSED Mercuric reductase OS=Pseudomonas sp. K-62 GN=merA PE=4 SV=1

BAC0307|pcoE|sp|Q47459|PCOE\_ECOLX Probable copper-binding protein PcoE OS=Escherichia coli GN=pcoE PE=4 SV=1

BAC0356|recG|tr|Q9HTL3|Q9HTL3\_PSEAE ATP-dependent DNA helicase RecG OS=Pseudomonas aeruginosa GN=recG PE=4 SV=1

BAC0109|cusC/ylcB|sp|P77211|CUSC\_ECOLI Cation efflux system protein CusC OS=Escherichia coli (strain K12) GN=cusC PE=4 SV=1

BAC0251|mntH/yfeP|sp|P0A769|MNTH\_ECOLI Divalent metal cation transporter MntH OS=Escherichia coli (strain K12) GN=mntH PE=4 SV=1

BAC0463|znuA/yebL|sp|P39172|ZNUA\_ECOLI High-affinity zinc uptake system protein ZnuA OS=Escherichia coli (strain K12) GN=znuA PE=4 SV=1

BAC0371|soxS|sp|P0A9E2|SOXS\_ECOLI Regulatory protein SoxS OS=Escherichia coli (strain K12) GN=soxS PE=4 SV=1

BAC0675|merP|tr|O07301|O07301\_9PSED Mercuric transport protein periplasmic component OS=Pseudomonas aeruginosa GN=merP PE=4 SV=1

BAC0107|cusA/ybdE|sp|P38054|CUSA\_ECOLI Cation efflux system protein CusA OS=Escherichia coli (strain K12) GN=cusA PE=4 SV=1

BAC0344|silE|sp|Q9Z4N3|SILE\_SALTM Silver-binding protein SilE OS=Salmonella typhimurium GN=silE PE=4 SV=1

BAC0687|merR|tr|Q79BG7|Q79BG7\_PSEST MerR OS=Pseudomonas stutzeri GN=merR PE=4 SV=1

BAC0574|arsB|sp|P30329|ARSB\_STAAU Arsenical pump membrane protein OS=Staphylococcus aureus GN=arsB PE=4 SV=1

BAC0348|silS|sp|Q9ZHD4|SILS\_SALTM Probable sensor kinase SilS OS=Salmonella typhimurium GN=silS PE=4 SV=1

BAC0686|merR|sp|P13111|MERR\_SERMA Mercuric resistance operon regulatory protein OS=Serratia marcescens GN=merR PE=4 SV=1

BAC0689|merR|tr|Q934S8|Q934S8\_THIFE Mer operon regulatory protein OS=Thiobacillus ferrooxidans GN=merR PE=4 SV=1

BAC0667|merD|sp|P08654|MERD\_SERMA HTH-type transcriptional regulator MerD OS=Serratia marcescens GN=merD PE=4 SV=1

BAC0134|dpr/dps|sp|P0CB53|DPS\_STRSU DNA protection during starvation protein OS=Streptococcus suis GN=dpr PE=4 SV=1

BAC0681|merR2|tr|Q9WWL1|Q9WWL1\_BACSR Mercury resistance operon negative regulator MerR2 OS=Bacillus subtilis GN=merR2 PE=4 SV=1

BAC0644|corD|sp|Q56017|APAG\_SALTY Protein ApaG OS=Salmonella typhimurium (strain LT2 / SGSC1412) GN=corD PE=4 SV=1

BAC0596|baeR|tr|D0ZNE3|D0ZNE3\_SALT1 DNA-binding transcriptional regulator BaeR OS=Salmonella typhimurium GN=baeR PE=4 SV=1

BAC0351|sitC|tr|Q9XCS0|Q9XCS0\_SALTM SitC OS=Salmonella typhimurium GN=sitC PE=3 SV=1

BAC0465|znuC/yebM|sp|P0A9X1|ZNUC\_ECOLI Zinc import ATP-binding protein ZnuC OS=Escherichia coli (strain K12) GN=znuC PE=4 SV=1

BAC0442|yfeD|sp|Q56955|YFED\_YERPE Chelated iron transport system membrane protein YfeD OS=Yersinia enterocolitica GN=yfeD PE=4 SV=1

BAC0309|pcoS|sp|Q47457|PCOS\_ECOLX Probable sensor protein PcoS OS=Escherichia coli GN=pcoS PE=3 SV=1

BAC0462|zntR/yhdM|sp|P0ACS5|ZNTR\_ECOLI HTH-type transcriptional regulator ZntR OS=Escherichia coli (strain K12) GN=zntR PE=4 SV=1

BAC0029|chrF|tr|A4UQR2|A4UQR2\_9RHIZ ChrF OS=Ochrobactrum tritici GN=chrF PE=4 SV=1

BAC0318|pstS|sp|P0AG82|PSTS\_ECOLI Phosphate-binding protein PstS OS=Escherichia coli (strain K12) GN=pstS PE=4 SV=1

BAC0165|fetA/ybbL|sp|P77279|YBBL\_ECOLI Uncharacterized ABC transporter ATP-binding protein YbbL OS=Escherichia coli (strain K12) GN=fetA PE=4 SV=1

BAC0672|merE|tr|Q79BE4|Q79BE4\_PSEST Urf1 OS=Pseudomonas stutzeri PE=4 SV=1

BAC0653|merA|tr|Q934S5|Q934S5\_THIFE Mercuric ion reductase OS=Thiobacillus ferrooxidans GN=merA PE=4 SV=1

BAC0619|copA|tr|Q7WYH1|Q7WYH1\_PSEPU CopA OS=Pseudomonas putida GN=copA PE=4 SV=1

BAC0201|kmtR|sp|O53838|KMTR\_MYCTU HTH-type transcriptional regulator KmtR OS=Mycobacterium tuberculosis GN=kmtR PE=4 SV=1

BAC0577|arsB|sp|P74985|ARSB\_YEREN Arsenical pump membrane protein OS=Yersinia enterocolitica GN=arsB PE=4 SV=1

BAC0625|copA|tr|F4ZCZ9|F4ZCZ9\_9XANT Copper resistance protein A OS=Xanthomonas alfalfae subsp. citri GN=copA PE=4 SV=1

BAC0610|modB|sp|P0AF01|MODB\_ECOLI Molybdenum transport system permease protein ModB OS=Escherichia coli (strain K12) GN=modB PE=4 SV=1

BAC0657|merB|tr|O07303|O07303\_9PSED Alkylmercury lyase OS=Pseudomonas sp. K-62 GN=merB PE=3 SV=1

BAC0343|silC|sp|Q9ZHD2|SILC\_SALTM Probable outer membrane lipoprotein SilC OS=Salmonella typhimurium GN=silC PE=4 SV=1

BAC0349|sitA|tr|Q9XCS2|Q9XCS2\_SALTI Iron transport protein, periplasmic-binding protein OS=Salmonella typhimurium GN=sitA PE=4 SV=1

BAC0440|yfeB|sp|Q56953|YFEB\_YERPE Chelated iron transport system membrane protein YfeB OS=Yersinia enterocolitica GN=yfeB PE=4 SV=1

BAC0135|dpsA|tr|Q8KR86|Q8KR86\_BURPE DpsA OS=Burkholderia pseudomallei GN=dpsA PE=3 SV=1  
BAC0119|czcA|sp|P13511|CZCA\_RALME Cobalt-zinc-cadmium resistance protein CzcA OS=Ralstonia metalli  
BAC0304|pcoB|sp|Q47453|PCOB\_ECOLX Copper resistance protein B OS=Escherichia coli GN=pcoB PE=4 SV  
BAC0108|cusB|sp|P77239|CUSB\_ECOLI Cation efflux system protein CusB OS=Escherichia coli (strain K12) G  
BAC0620|copA|sp|P32113|COPA\_ENTHA Probable copper-importing P-type ATPase A OS=Enterococcus hira  
BAC0647|mdtC|tr|D0ZNE0|D0ZNE0\_SALT1 Multidrug resistance protein MdtC OS=Salmonella typhimurium (S  
BAC0641|corA|sp|P0A2R8|CORA\_SALTY Magnesium transport protein CorA OS=Salmonella typhimurium (str  
BAC0279|nirD|tr|Q6RUG0|Q6RUG0\_KLEOX NirD OS=Klebsiella oxytoca GN=nirD PE=4 SV=1  
BAC0039|baeR|sp|P69228|BAER\_ECOLI Transcriptional regulatory protein BaeR OS=Escherichia coli (strain K  
BAC0179|gesB|tr|Q8ZRG9|Q8ZRG9\_SALTY Putative cation efflux system protein OS=Salmonella typhimurium  
BAC0469|zupT|ygiE|sp|P0A8H3|ZUPT\_ECOLI Zinc transporter ZupT OS=Escherichia coli (strain K12) GN=zu  
BAC0583|arsC|sp|P52147|ARSC2\_ECOLX Arsenate reductase OS=Escherichia coli GN=arsC PE=3 SV=1  
BAC0057|cadD|tr|Q7A320|Q7A320\_STAAN CadD OS=Staphylococcus aureus (strain N315) GN=cadD PE=4 S  
BAC0434|ychH|sp|P0AB49|YCHH\_ECOLI Uncharacterized protein YchH OS=Escherichia coli (strain K12) GN  
BAC0358|oscA|tr|B6CM35|B6CM35\_9PSED Putative uncharacterized protein oscA OS=Pseudomonas corrugata  
BAC0023|aioS|aoxS|tr|Q2VGB2|Q2VGB2\_RHIRD Putative sensor histidine kinase OS=Rhizobium radiobacter C  
BAC0467|zraR|hydH|sp|P14375|ZRAR\_ECOLI Transcriptional regulatory protein ZraR OS=Escherichia coli (str  
BAC0565|actR|sp|A6UEL7|ACTR\_SINMW Acid tolerance regulatory protein ActR OS=Sinorhizobium medicae  
BAC0388|terC|sp|P18780|TERC\_ALCSP Tellurium resistance protein TerC OS=Alcaligenes sp. GN=terC PE=3  
BAC0105|cueR|ybbI|sp|P0A9G4|CUER\_ECOLI HTH-type transcriptional regulator CueR OS=Escherichia coli (S  
BAC0392|terZ|sp|Q52353|TERZ\_SERMA Tellurium resistance protein TerZ OS=Serratia marcescens GN=terZ F  
BAC0110|cusF|cusX|sp|P77214|CUSF\_ECOLI Cation efflux system protein CusF OS=Escherichia coli (strain K  
BAC0082|copL|tr|Q5YKV8|Q5YKV8\_9XANT CopL OS=Xanthomonas perforans GN=copL PE=4 SV=1  
BAC0251|mntH|yfeP|sp|P0A769|MNTH\_ECOLI Divalent metal cation transporter MntH OS=Escherichia coli (S  
BAC0199|klaB|telA|kilB|sp|Q52328|KLAB\_ECOLX Protein KlaB OS=Escherichia coli GN=klaB PE=3 SV=1  
BAC0455|ziaA|sp|Q59998|ATZN\_SYNY3 Zinc-transporting ATPase OS=Synechocystis sp. (strain PCC 6803 / K  
BAC0678|merP|tr|O66016|O66016\_PSEST MerP OS=Pseudomonas stutzeri GN=merP PE=4 SV=1  
BAC0308|pcoR|sp|Q47456|PCOR\_ECOLX Transcriptional regulatory protein PcoR OS=Escherichia coli GN=pc  
BAC0344|silE|sp|Q9Z4N3|SILE\_SALTM Silver-binding protein SilE OS=Salmonella typhimurium GN=silE PE  
BAC0384|tehA|sp|P25396|TEHA\_ECOLI Tellurite resistance protein TehA OS=Escherichia coli (strain K12) GN  
BAC0357|recG|tr|B5L350|B5L350\_9PSED ATP-dependent DNA helicase (Fragment) OS=Pseudomonas corruga  
BAC0224|merA|sp|P16171|MERA\_BACCE Mercuric reductase OS=Bacillus cereus GN=merA PE=1 SV=1  
BAC0119|czcA|sp|P13511|CZCA\_RALME Cobalt-zinc-cadmium resistance protein CzcA OS=Ralstonia metalli  
BAC0640|copD|tr|C6FFR7|C6FFR7\_PSEFL CopD OS=Pseudomonas fluorescens GN=copD PE=4 SV=1  
BAC0356|recG|tr|Q9HTL3|Q9HTL3\_PSEAE ATP-dependent DNA helicase RecG OS=Pseudomonas aeruginosa  
BAC0168|fptA|sp|P42512|FPTA\_PSEAE Fe(3+)-pyochelin receptor OS=Pseudomonas aeruginosa (strain ATCC  
BAC0621|copA|tr|F4ZBX3|F4ZBX3\_XANCI CopA OS=Xanthomonas citri subsp. citri GN=copA PE=4 SV=1  
BAC0026|chrA|tr|A4UQR4|A4UQR4\_9RHIZ Chromate transporter OS=Ochrobactrum tritici GN=chrA PE=4 SV  
BAC0341|silA|sp|Q9ZHC9|SILA\_SALTM Putative cation efflux system protein SilA OS=Salmonella typhimuri  
BAC0343|silC|sp|Q9ZHD2|SILC\_SALTM Probable outer membrane lipoprotein SilC OS=Salmonella typhimuri  
BAC0568|actP|sp|Q9X5V3|ATCU\_RHILV Copper-transporting P-type ATPase OS=Rhizobium leguminosarum L  
BAC0652|merA|tr|O66017|O66017\_PSEST MerA OS=Pseudomonas stutzeri GN=merA PE=4 SV=1  
BAC0566|actS|tr|Q52912|Q52912\_9RHIZ Histidine protein kinase OS=Sinorhizobium medicae GN=actS PE=4 S  
BAC0179|gesB|tr|Q8ZRG9|Q8ZRG9\_SALTY Putative cation efflux system protein OS=Salmonella typhimurium  
BAC0066|chrF|tr|Q5NUZ7|Q5NUZ7\_RALME ChrF, regulatory protein, involved in Chromate resistance OS=Ra  
BAC0573|arsB|sp|P45946|ARSB\_BACSU Arsenite resistance protein ArsB OS=Bacillus subtilis (strain 168) GN



BAC0459|zitB|ybgR|sp|P75757|ZITB\_ECOLI Zinc transporter ZitB OS=Escherichia coli (strain K12) GN=zitB PE=4 SV=1  
BAC0031|arsB|sp|P08691|ARSB1\_ECOLX Arsenical pump membrane protein OS=Escherichia coli GN=arsB PE=4 SV=1  
BAC0596|baeR|tr|D0ZNE3|D0ZNE3\_SALT1 DNA-binding transcriptional regulator BaeR OS=Salmonella typhimurium GN=baeR PE=4 SV=1  
BAC0681|merR2|tr|Q9WWL1|Q9WWL1\_BACSR Mercury resistance operon negative regulator MerR2 OS=Bacillus cereus GN=merR2 PE=4 SV=1  
BAC0563|acrD|tr|Q8ZN77|Q8ZN77\_SALTY RND family aminoglycoside/multidrug efflux pump OS=Salmonella typhimurium GN=acrD PE=4 SV=1  
BAC0694|merT-P|tr|H6WCN3|H6WCN3\_9FLAO MerT-P OS=Tenacibaculum discolor GN=merT-P PE=4 SV=1  
BAC0666|merD|tr|O66018|O66018\_PSEST MerD OS=Pseudomonas stutzeri GN=merD PE=4 SV=1  
BAC0098|ctpC|sp|P0A502|CTPC\_MYCTU Probable manganese/zinc-exporting P-type ATPase OS=Mycobacterium tuberculosis GN=ctpC PE=4 SV=1  
BAC0650|merA|tr|O08449|O08449\_9PSED Mercuric reductase OS=Pseudomonas sp. K-62 GN=merA PE=4 SV=1  
BAC0351|sitC|tr|Q9XCS0|Q9XCS0\_SALTM SitC OS=Salmonella typhimurium GN=sitC PE=3 SV=1  
BAC0498|ideR|sp|P0A672|IDER\_MYCTU Iron-dependent repressor IdeR OS=Mycobacterium tuberculosis GN=ideR PE=4 SV=1  
BAC0386|terA|sp|P18778|TERA\_ALCSP Tellurium resistance protein TerA OS=Alcaligenes sp. GN=terA PE=4 SV=1  
BAC0331|rcnB|yohN|sp|P64534|RCNB\_ECOLI Nickel/cobalt homeostasis protein RcnB OS=Escherichia coli (strain K12) GN=rcnB PE=4 SV=1  
BAC0058|cadR|tr|Q93TP7|Q93TP7\_PSEPU CadR OS=Pseudomonas putida GN=cadR PE=4 SV=1  
BAC0012|actP|sp|Q9X5X3|ATCU\_SINMW Copper-transporting P-type ATPase OS=Sinorhizobium medicae (strain S1) GN=actP PE=4 SV=1  
BAC0034|arsH|tr|E8PS81|E8PS81\_YERPE Arsenic resistance protein ArsH OS=Yersinia pestis Java 9 GN=arsH PE=4 SV=1  
BAC0441|yfeC|sp|Q56954|YFEC\_YERPE Chelated iron transport system membrane protein YfeC OS=Yersinia pestis Java 9 GN=yfeC PE=4 SV=1  
BAC0133|dnaK|sp|P0A5B9|DNAK\_MYCTU Chaperone protein DnaK OS=Mycobacterium tuberculosis GN=dnaK PE=4 SV=1  
BAC0667|merD|sp|P08654|MERC\_SERMA HTH-type transcriptional regulator MerD OS=Serratia marcescens GN=merD PE=4 SV=1  
BAC0647|mdtC|tr|D0ZNE0|D0ZNE0\_SALT1 Multidrug resistance protein MdtC OS=Salmonella typhimurium GN=mdtC PE=4 SV=1  
BAC0584|arsC|sp|O50595|ARSC\_ACIMA Arsenate reductase OS=Acidiphilium multivorum (strain DSM 11245) GN=arsC PE=4 SV=1  
BAC0685|merR|tr|H6WCN2|H6WCN2\_9FLAO MerR OS=Tenacibaculum discolor GN=merR PE=4 SV=1  
BAC0572|arsA|sp|P08690|ARSA1\_ECOLX Arsenical pump-driving ATPase OS=Escherichia coli GN=arsA PE=4 SV=1  
BAC0656|merB3|tr|Q7DHE7|Q7DHE7\_BACCE Organomercurial lyase enzyme OS=Bacillus cereus GN=merB3 PE=4 SV=1  
BAC0609|modA|sp|P37329|MODA\_ECOLI Molybdate-binding periplasmic protein OS=Escherichia coli (strain K12) GN=modA PE=4 SV=1  
BAC0124|czcP|tr|Q1LAJ7|Q1LAJ7\_RALME CzcP cation efflux P1-ATPase OS=Ralstonia metallidurans (strain ATCC 35061) GN=czcP PE=4 SV=1  
BAC0345|silF|tr|Q9ZHD1|Q9ZHD1\_SALTM Uncharacterized protein OS=Salmonella typhimurium GN=ORF96 GN=silF PE=4 SV=1  
BAC0240|mexI|tr|Q9HWH4|Q9HWH4\_PSEAE Probable Resistance-Nodulation-Cell Division (RND) efflux transporter OS=Pseudomonas aeruginosa GN=mexI PE=4 SV=1  
BAC0673|merE|sp|P06690|MERE\_PSEAI Uncharacterized mercuric resistance protein MerE OS=Pseudomonas aeruginosa GN=merE PE=4 SV=1  
BAC0165|fetA|ybbL|sp|P77279|YBBL\_ECOLI Uncharacterized ABC transporter ATP-binding protein YbbL OS=Escherichia coli (strain K12) GN=fetA GN=ybbL PE=4 SV=1  
BAC0231|merP|sp|P13113|MERP\_SERMA Mercuric transport protein periplasmic component OS=Serratia marcescens GN=merP PE=4 SV=1  
BAC0389|terD|sp|P18781|TERD\_ALCSP Tellurium resistance protein TerD OS=Alcaligenes sp. GN=terD PE=3 SV=1  
BAC0686|merR|sp|P13111|MERR\_SERMA Mercuric resistance operon regulatory protein OS=Serratia marcescens GN=merR PE=4 SV=1  
BAC0610|modB|sp|P0AF01|MODB\_ECOLI Molybdenum transport system permease protein ModB OS=Escherichia coli (strain K12) GN=modB PE=4 SV=1  
BAC0114|cutC|sp|P67826|CUTC\_ECOLI Copper homeostasis protein CutC OS=Escherichia coli (strain K12) GN=cutC PE=4 SV=1  
BAC0468|zraS|hydG|sp|P14377|ZRAS\_ECOLI Sensor protein ZraS OS=Escherichia coli (strain K12) GN=zraS GN=hydG PE=4 SV=1  
BAC0439|yfeA|sp|Q56952|YFEA\_YERPE Periplasmic chelated iron-binding protein YfeA OS=Yersinia pestis G2000 GN=yfeA PE=4 SV=1  
BAC0485|pmrC|tr|Q70FH1|Q70FH1\_PECCC Putative cytoplasmic membrane protein pmrC OS=Pectobacterium carotovorum GN=pmrC PE=4 SV=1  
BAC0169|fpvA|sp|P48632|FPVA\_PSEAE Ferripyoverdine receptor OS=Pseudomonas aeruginosa (strain ATCC 27802) GN=fpvA PE=4 SV=1  
BAC0121|czcC|sp|P13509|CZCC\_RALME Cobalt-zinc-cadmium resistance protein CzcC OS=Ralstonia metallidurans GN=czcC PE=4 SV=1  
BAC0348|silS|sp|Q9ZHD4|SILS\_SALTM Probable sensor kinase SilS OS=Salmonella typhimurium GN=silS PE=4 SV=1  
BAC0682|merR1|sp|P22853|MERR\_BACCE Mercuric resistance operon regulatory protein OS=Bacillus cereus GN=merR1 PE=4 SV=1  
BAC0136|dsbA|sp|P0AEG4|DSBA\_ECOLI Thiol:disulfide interchange protein DsbA OS=Escherichia coli (strain K12) GN=dsbA PE=4 SV=1  
BAC0107|cusA|ybdE|sp|P38054|CUSA\_ECOLI Cation efflux system protein CusA OS=Escherichia coli (strain K12) GN=cusA GN=ybdE PE=4 SV=1  
BAC0228|merF|tr|Q2QCN0|Q2QCN0\_9PSED MerF OS=Pseudomonas sp. CT14 GN=merF PE=4 SV=1  
BAC0035|arsM|tr|Q6N3Y0|Q6N3Y0\_RHOPA UbiE/COQ5 methyltransferase OS=Rhodospseudomonas palustris GN=arsM PE=4 SV=1

BAC0657|merB|tr|O07303|O07303\_9PSED Alkylmercury lyase OS=Pseudomonas sp. K-62 GN=merB PE=3 SV=1  
BAC0303|pcoA|sp|Q47452|PCOA\_ECOLX Copper resistance protein A OS=Escherichia coli GN=pcoA PE=3 SV=1  
BAC0167|fieF/yiip|sp|P69380|FIEF\_ECOLI Ferrous-iron efflux pump FieF OS=Escherichia coli (strain K12) GN=...  
BAC0585|arsC|sp|P74984|ARSC\_YEREN Arsenate reductase OS=Yersinia enterocolitica GN=arsC PE=3 SV=1  
BAC0688|merR2|tr|Q79B70|Q79B70\_PSEST Organomercurial resistance regulatory protein OS=Pseudomonas sp.  
BAC0271|nikB|sp|P33591|NIKB\_ECOLI Nickel transport system permease protein NikB OS=Escherichia coli (s  
BAC0670|merE|tr|Q52104|Q52104\_9ZZZZ Uncharacterized protein OS=Plasmid pDU1358 PE=4 SV=1  
BAC0687|merR|tr|Q79BG7|Q79BG7\_PSEST MerR OS=Pseudomonas stutzeri GN=merR PE=4 SV=1  
BAC0649|merA|tr|E3VST6|E3VST6\_9FLAO MerA OS=Tenacibaculum discolor GN=merA PE=3 SV=1  
BAC0332|rcnR/yohL|sp|P64530|RCNR\_ECOLI Transcriptional repressor RcnR OS=Escherichia coli (strain K12)  
BAC0470|zur/yjbK|sp|P0AC51|ZUR\_ECOLI Zinc uptake regulation protein OS=Escherichia coli (strain K12) GN=...  
BAC0571|arsA|sp|O50593|ARSA\_ACIMA Arsenical pump-driving ATPase OS=Acidiphilium multivorum (strain  
BAC0317|pstC|sp|P0AGH8|PSTC\_ECOLI Phosphate transport system permease protein PstC OS=Escherichia co  
BAC0086|corA|sp|P0ABI4|CORA\_ECOLI Magnesium transport protein CorA OS=Escherichia coli (strain K12)  
BAC0106|cuiD|sp|Q8ZRS2|CUEO\_SALTY Blue copper oxidase CueO OS=Salmonella typhimurium (strain LT2  
BAC0548|chrA1|sp|P17551|CHRA1\_RALME Chromate transport protein OS=Ralstonia metallidurans (strain CH  
BAC0266|ncrY|tr|Q06VT0|Q06VT0\_9BACT NcrY OS=Leptospirillum ferriphilum GN=ncrY PE=4 SV=1  
BAC0276|nirA|tr|Q6RUG3|Q6RUG3\_KLEOX NirA OS=Klebsiella oxytoca GN=nirA PE=4 SV=1  
BAC0077|copA|sp|P12374|COPA\_PSEUB Copper resistance protein A OS=Pseudomonas syringae pv. tomato G  
BAC0631|copC|tr|F4ZBX9|F4ZBX9\_XANCI CopC OS=Xanthomonas citri subsp. citri GN=copC PE=4 SV=1  
BAC0115|cutE|lnt|sp|P23930|LNT\_ECOLI Apolipoprotein N-acyltransferase OS=Escherichia coli (strain K12) G  
BAC0576|arsB|sp|P52146|ARSB2\_ECOLX Arsenical pump membrane protein OS=Escherichia coli GN=arsB PE  
BAC0597|baeS|tr|D0ZNE2|D0ZNE2\_SALT1 Signal transduction histidine-protein kinase BaeS OS=Salmonella t  
BAC0639|copC|tr|C6FFR6|C6FFR6\_PSEFL CopC OS=Pseudomonas fluorescens GN=copC PE=4 SV=1  
BAC0116|cutF/nlpE|sp|P40710|NLPE\_ECOLI Lipoprotein NlpE OS=Escherichia coli (strain K12) GN=nlpE PE  
BAC0020|aioA/aoxB|sp|Q8GGJ6|AIOA\_HERAR Arsenite oxidase subunit AioA OS=Herminiimonas arsenicoxy  
BAC0371|soxS|sp|P0A9E2|SOXS\_ECOLI Regulatory protein SoxS OS=Escherichia coli (strain K12) GN=soxS  
BAC0368|sodA|sp|P00448|SODM\_ECOLI Superoxide dismutase [Mn] OS=Escherichia coli (strain K12) GN=so  
BAC0627|copB|tr|F4ZD00|F4ZD00\_9XANT Copper resistance protein B OS=Xanthomonas alfalfae subsp. citru  
BAC0334|robA|sp|P0ACI0|ROB\_ECOLI Right origin-binding protein OS=Escherichia coli (strain K12) GN=rob  
BAC0113|cutA|sp|P69488|CUTA\_ECOLI Divalent-cation tolerance protein CutA OS=Escherichia coli (strain K1  
BAC0067|cinA|tr|Q9I036|Q9I036\_PSEAE Uncharacterized protein OS=Pseudomonas aeruginosa (strain ATCC 1  
BAC0632|copD|sp|P12377|COPD\_PSEUB Copper resistance protein D OS=Pseudomonas syringae pv. tomato G  
BAC0130|cztA|tr|Q9RLI8|Q9RLI8\_PSEAI CztA protein OS=Pseudomonas aeruginosa GN=cztA PE=4 SV=1  
BAC0582|arsC|sp|P08692|ARSC1\_ECOLX Arsenate reductase OS=Escherichia coli GN=arsC PE=1 SV=1  
BAC0108|cusB|sp|P77239|CUSB\_ECOLI Cation efflux system protein CusB OS=Escherichia coli (strain K12) G  
BAC0642|mgtA|sp|P36640|ATMA\_SALTY Magnesium-transporting ATPase, P-type 1 OS=Salmonella typhimu  
BAC0452|yqjH|sp|Q46871|YQJH\_ECOLI NADPH-dependent ferric-chelate reductase OS=Escherichia coli (strai  
BAC0087|mgtA|sp|P0ABB8|ATMA\_ECOLI Magnesium-transporting ATPase, P-type 1 OS=Escherichia coli (str  
BAC0027|chrB|tr|A4UQR5|A4UQR5\_9RHIZ ChrB OS=Ochrobactrum tritici GN=chrB PE=4 SV=1  
BAC0299|pbrB/pbrC|tr|Q58AJ7|Q58AJ7\_RALME Lipoprotein signal peptidase OS=Ralstonia metallidurans (stra  
BAC0040|baeS|sp|P30847|BAES\_ECOLI Signal transduction histidine-protein kinase BaeS OS=Escherichia coli  
BAC0611|modC|sp|P09833|MODC\_ECOLI Molybdenum import ATP-binding protein ModC OS=Escherichia co  
BAC0385|tehB|sp|P25397|TEHB\_ECOLI Tellurite methyltransferase OS=Escherichia coli (strain K12) GN=tehB  
BAC0003|acn|tr|O53166|O53166\_MYCTU Aconitate hydratase OS=Mycobacterium tuberculosis H37Rv GN=R  
BAC0608|modE|sp|P0A9G8|MODE\_ECOLI Transcriptional regulator ModE OS=Escherichia coli (strain K12) G

BAC0048|bfrA|sp|P63697|BFR\_MYCTU Bacterioferritin OS=Mycobacterium tuberculosis GN=bfr PE=1 SV=1  
BAC0100|ctpG|sp|P63689|CTPG\_MYCTU Probable cation-transporting ATPase G OS=Mycobacterium tubercul  
BAC0024|aioX|aoxX|tr|G8XNW6|G8XNW6\_RHIRD AioX (Fragment) OS=Rhizobium radiobacter GN=aioX PE  
BAC0252|mntP|yebN|sp|P76264|MNTP\_ECOLI Probable manganese efflux pump MntP OS=Escherichia coli (str  
BAC0063|chrA|sp|P14285|CHRA\_PSEAI Chromate transport protein OS=Pseudomonas aeruginosa GN=chrA PE  
BAC0577|arsB|sp|P74985|ARSB\_YEREN Arsenical pump membrane protein OS=Yersinia enterocolitica GN=ar  
BAC0665|merD|tr|O66022|O66022\_PSEST Mercury operon coregulator protein OS=Pseudomonas stutzeri GN=me  
BAC0112|cusS|sp|P77485|CUSS\_ECOLI Sensor kinase CusS OS=Escherichia coli (strain K12) GN=cusS PE=1  
BAC0350|sitB|tr|Q9XCS1|Q9XCS1\_SALTM SitB OS=Salmonella typhimurium GN=sitB PE=3 SV=1  
BAC0540|nfsA|sp|P17117|NFSA\_ECOLI Oxygen-insensitive NADPH nitroreductase OS=Escherichia coli (strain  
BAC0695|merT|sp|P13112|MERT\_SERMA Mercuric transport protein OS=Serratia marcescens GN=merT PE=4  
BAC0690|merT|tr|Q934S7|Q934S7\_THIFE Mercuric ion transport protein OS=Thiobacillus ferrooxidans GN=me  
BAC0315|pstA|sp|P07654|PSTA\_ECOLI Phosphate transport system permease protein PstA OS=Escherichia coli  
BAC0272|nikC|sp|P0AFA9|NIKC\_ECOLI Nickel transport system permease protein NikC OS=Escherichia coli  
BAC0346|silP|sp|Q9ZHC7|SILP\_SALTM Silver exporting P-type ATPase OS=Salmonella typhimurium GN=silP  
BAC0265|ncrC|tr|D5CKG5|D5CKG5\_ENTCC Nickel-resistant membrane protein-like protein NcrC OS=Enterob  
BAC0570|actP|tr|D5AU53|D5AU53\_RHOBC Cation/acetate symporter ActP-1 OS=Rhodobacter capsulatus (stra  
BAC0432|ybtP|tr|Q9R7V3|Q9R7V3\_YERPE Lipoprotein inner membrane ABC-transporter OS=Yersinia pestis  
BAC0395|trgB|tr|O07841|O07841\_RHOSH Tellurite resistance protein OS=Rhodobacter sphaeroides GN=trgB  
BAC0629|copB|sp|O30085|COPB\_ARCFU Copper-exporting P-type ATPase B OS=Archaeoglobus fulgidus (str  
BAC0541|yieF|sp|P0AGE6|YIEF\_ECOLI Uncharacterized protein YieF OS=Escherichia coli (strain K12) GN=y  
BAC0316|pstB|sp|P0AAH0|PSTB\_ECOLI Phosphate import ATP-binding protein PstB OS=Escherichia coli (stra  
BAC0039|baeR|sp|P69228|BAER\_ECOLI Transcriptional regulatory protein BaeR OS=Escherichia coli (strain K  
BAC0683|merR1|tr|O07300|O07300\_9PSED Mercuric resistance operon regulatory protein OS=Pseudomonas sp  
BAC0181|glpF|sp|P0AER0|GLPF\_ECOLI Glycerol uptake facilitator protein OS=Escherichia coli (strain K12) G  
BAC0307|pcoE|sp|Q47459|PCOE\_ECOLX Probable copper-binding protein PcoE OS=Escherichia coli GN=pcoE  
BAC0463|znuA|yebL|sp|P39172|ZNUA\_ECOLI High-affinity zinc uptake system protein ZnuA OS=Escherichia  
BAC0451|yodD|sp|P64519|YODD\_ECOLI Uncharacterized protein YodD OS=Escherichia coli (strain K12) GN=  
BAC0461|zntA|yhhO|sp|P37617|ATZN\_ECOLI Lead, cadmium, zinc and mercury-transporting ATPase OS=Esc  
BAC0229|merG|tr|O07302|O07302\_9PSED Mercuric resistance protein OS=Pseudomonas sp. K-62 GN=merG P  
BAC0648|merA|sp|P08662|MERA\_SERMA Mercuric reductase (Fragments) OS=Serratia marcescens GN=merA  
BAC0103|cueO|sp|P36649|CUEO\_ECOLI Blue copper oxidase CueO OS=Escherichia coli (strain K12) GN=cue  
BAC0030|arsA|sp|P52145|ARSA2\_ECOLX Arsenical pump-driving ATPase OS=Escherichia coli GN=arsA PE=1  
BAC0183|golT|tr|Q8ZRG7|Q8ZRG7\_SALTY Putative cation transport ATPase OS=Salmonella typhimurium (str  
BAC0464|znuB|yebI|sp|P39832|ZNUB\_ECOLI High-affinity zinc uptake system membrane protein ZnuB OS=Es  
BAC0440|yfeB|sp|Q56953|YFEB\_YERPE Chelated iron transport system membrane protein YfeB OS=Yersinia  
BAC0691|merT|tr|Q52397|Q52397\_PSEST Mercury transport protein OS=Pseudomonas stutzeri GN=merT PE=1  
BAC0083|copR|sp|Q02540|COPR\_PSEUB Transcriptional activator protein CopR OS=Pseudomonas syringae pv  
BAC0646|mdtB|tr|D0ZND9|D0ZND9\_SALT1 Multidrug resistance protein MdtB OS=Salmonella typhimurium  
BAC0071|cmtR|sp|P67731|CMTR\_MYCTU HTH-type transcriptional regulator CmtR OS=Mycobacterium tubercul  
BAC0355|ruvB|sp|Q51426|RUVB\_PSEAE Holliday junction ATP-dependent DNA helicase RuvB OS=Pseudomon  
BAC0620|copA|sp|P32113|COPA\_ENTHA Probable copper-importing P-type ATPase A OS=Enterococcus hirae  
BAC0347|silR|sp|Q9ZHD3|SILR\_SALTM Probable transcriptional regulatory protein SilR OS=Salmonella typhi  
BAC0458|zipB|tr|Q7WJT8|Q7WJT8\_BORBR Putative membrane protein OS=Bordetella bronchiseptica (strain A  
BAC0302|pbrT|tr|Q5GR69|Q5GR69\_ALCXX Lead uptake protein PbrT OS=Alcaligenes xylosoxydans xylosoxy  
BAC0588|arsR|tr|P74986|P74986\_YEREN Arsenite inducible repressor OS=Yersinia enterocolitica GN=arsR PE

BAC0659|merB|sp|P08664|MERB\_SERMA Alkylmercury lyase OS=Serratia marcescens GN=merB PE=3 SV=1  
BAC0270|nikA|sp|P33590|NIKA\_ECOLI Nickel-binding periplasmic protein OS=Escherichia coli (strain K12) GN=nikA PE=4 SV=1  
BAC0638|copR|tr|C6FFR4|C6FFR4\_PSEFL CopR OS=Pseudomonas fluorescens GN=copR PE=4 SV=1  
BAC0049|bhsA|ycfR|comC|sp|P0AB40|BHSA\_ECOLI Multiple stress resistance protein BhsA OS=Escherichia coli (strain K12) GN=bhsA PE=4 SV=1  
BAC0625|copA|tr|F4ZCZ9|F4ZCZ9\_9XANT Copper resistance protein A OS=Xanthomonas alfalfae subsp. citri GN=copA PE=4 SV=1  
BAC0383|tcrB|tr|Q8VPE6|Q8VPE6\_ENTFC TcrB OS=Enterococcus faecium GN=tcrB PE=3 SV=1  
BAC0263|ncrA|tr|Q06VT3|Q06VT3\_9BACT NcrA OS=Leptospirillum ferriphilum GN=ncrA PE=4 SV=1  
BAC0643|corB|tr|Q9X621|Q9X621\_SALTM CorB OS=Salmonella typhimurium GN=corB PE=4 SV=1  
BAC0255|mreA|tr|Q88IN0|Q88IN0\_PSEPK Putative uncharacterized protein OS=Pseudomonas putida (strain KT) GN=mreA PE=4 SV=1  
BAC0059|cadX|tr|A7LHQ4|A7LHQ4\_STRSL CadX OS=Streptococcus salivarius GN=cadX PE=4 SV=1  
BAC0465|znuC|yebM|sp|P0A9X1|ZNUC\_ECOLI Zinc import ATP-binding protein ZnuC OS=Escherichia coli (strain K12) GN=znuC PE=4 SV=1  
BAC0079|copB|sp|P05425|COPB\_ENTHA Copper-exporting P-type ATPase B OS=Enterococcus hirae (strain ATCC 29542) GN=copB PE=4 SV=1  
BAC0628|copB|tr|F4ZBX4|F4ZBX4\_XANCI CopB OS=Xanthomonas citri subsp. citri GN=copB PE=4 SV=1  
BAC0111|cusR|ylcA|sp|P0ACZ8|CUSR\_ECOLI Transcriptional regulatory protein CusR OS=Escherichia coli (strain K12) GN=cusR PE=4 SV=1  
BAC0318|pstS|sp|P0AG82|PSTS\_ECOLI Phosphate-binding protein PstS OS=Escherichia coli (strain K12) GN=pstS PE=4 SV=1  
BAC0490|G2alt|tr|B0FSM1|B0FSM1\_9BACI 7-cyano-7-deazaguanine synthase OS=Anoxybacillus gonensis GN=G2alt PE=4 SV=1  
BAC0135|dpsA|tr|Q8KR86|Q8KR86\_BURPE DpsA OS=Burkholderia pseudomallei GN=dpsA PE=3 SV=1  
BAC0190|hmrR|sp|Q9X5X4|HMRR\_SINMW HTH-type transcriptional regulator HmrR OS=Sinorhizobium medicae GN=hmrR PE=4 SV=1  
BAC0391|terW|sp|P75010|TERW\_SERMA Tellurium resistance protein TerW OS=Serratia marcescens GN=terW PE=4 SV=1  
BAC0612|perO|tr|D5AQ60|D5AQ60\_RHOEB Divalent ion symporter OS=Rhodobacter capsulatus (strain ATCC 49619) GN=perO PE=4 SV=1  
BAC0267|nczA|tr|B8GZE9|B8GZE9\_CAUCN Cobalt-zinc-cadmium resistance protein czcA OS=Caulobacter crescentus GN=nczA PE=4 SV=1  
BAC0697|merT|tr|Q7DHE5|Q7DHE5\_BACCE Mercury transport protein OS=Bacillus cereus GN=merT PE=4 SV=1  
BAC0390|terE|sp|P18782|TERE\_ALCSP Tellurium resistance protein TerE OS=Alcaligenes sp. GN=terE PE=3 SV=1  
BAC0162|fbpC|sp|P44513|FBPC2\_HAEIN Fe(3+) ions import ATP-binding protein FbpC 2 OS=Haemophilus influenzae (strain ATCC 49619) GN=fbpC PE=4 SV=1  
BAC0549|nccA|sp|Q44586|NCCA\_ALCXX Nickel-cobalt-cadmium resistance protein NccA OS=Alcaligenes xylosoxidans GN=nccA PE=4 SV=1  
BAC0698|ncrA|tr|Q1KLR2|Q1KLR2\_SERMA NcrA OS=Serratia marcescens GN=ncrA PE=4 SV=1  
BAC0088|corC|sp|P0A2L3|CORC\_SALTY Magnesium and cobalt efflux protein CorC OS=Salmonella typhimurium GN=corC PE=4 SV=1  
BAC0589|arsR|sp|P15905|ARSR1\_ECOLX Arsenical resistance operon repressor OS=Escherichia coli GN=arsR PE=4 SV=1  
BAC0641|corA|sp|P0A2R8|CORA\_SALTY Magnesium transport protein CorA OS=Salmonella typhimurium (strain ATCC 14028) GN=corA PE=4 SV=1  
BAC0137|dsbB|sp|P0A6M2|DSBB\_ECOLI Disulfide bond formation protein B OS=Escherichia coli (strain K12) GN=dsbB PE=4 SV=1  
BAC0056|cadC|sp|P20047|CADC\_STAAU Cadmium resistance transcriptional regulatory protein CadC OS=Staphylococcus aureus GN=cadC PE=4 SV=1  
BAC0707|sodB|sp|P0AGD3|SODF\_ECOLI Superoxide dismutase [Fe] OS=Escherichia coli (strain K12) GN=sodB PE=4 SV=1  
BAC0166|fetB|ybbM|sp|P77307|YBBM\_ECOLI UPF0014 inner membrane protein YbbM OS=Escherichia coli (strain K12) GN=fetB PE=4 SV=1  
BAC0264|ncrB|tr|Q06VT2|Q06VT2\_9BACT NcrB OS=Leptospirillum ferriphilum GN=ncrB PE=4 SV=1  
BAC0442|yfeD|sp|Q56955|YFED\_YERPE Chelated iron transport system membrane protein YfeD OS=Yersinia enterocolitica GN=yfeD PE=4 SV=1  
BAC0101|ctpV|sp|P77894|CTPV\_MYCTU Probable copper-exporting P-type ATPase V OS=Mycobacterium tuberculosis GN=ctpV PE=4 SV=1  
BAC0672|merE|tr|Q79BE4|Q79BE4\_PSEST Urf1 OS=Pseudomonas stutzeri PE=4 SV=1  
BAC0342|silB|sp|Q9ZHD0|SILB\_SALTM Putative membrane fusion protein SilB OS=Salmonella typhimurium GN=silB PE=4 SV=1  
BAC0693|merT|tr|Q79F00|Q79F00\_9PSED Mercuric transport protein OS=Pseudomonas sp. K-62 GN=merT PE=4 SV=1  
BAC0684|merR2|tr|Q7DKL2|Q7DKL2\_9PSED MerR2 OS=Pseudomonas sp. K-62 GN=merR2 PE=4 SV=1  
BAC0300|pbrD|tr|Q1LAL8|Q1LAL8\_RALME PbrD, Pb(II) binding protein involved in Pb(II) resistance OS=Ralstonia solanaceae GN=pbrD PE=4 SV=1  
BAC0163|fecD|sp|P15029|FECD\_ECOLI Fe(3+) dicitrate transport system permease protein FecD OS=Escherichia coli (strain K12) GN=fecD PE=4 SV=1  
BAC0462|zntR|yhdM|sp|P0ACS5|ZNTR\_ECOLI HTH-type transcriptional regulator ZntR OS=Escherichia coli (strain K12) GN=zntR PE=4 SV=1  
BAC0619|copA|tr|Q7WYH1|Q7WYH1\_PSEPU CopA OS=Pseudomonas putida GN=copA PE=4 SV=1  
BAC0689|merR|tr|Q934S8|Q934S8\_THIFE Mer operon regulatory protein OS=Thiobacillus ferrooxidans GN=merR PE=4 SV=1  
BAC0482|dmeF|tr|Q1MJL2|Q1MJL2\_RHIL3 Putative cation efflux system protein OS=Rhizobium leguminosarum GN=dmeF PE=4 SV=1

BAC0445|ygiW|sp|P0ADU5|YGIW\_ECOLI Protein YgiW OS=Escherichia coli (strain K12) GN=ygiW PE=1 SV=1  
BAC0102|cueA|tr|Q8KWW2|Q8KWW2\_PSEPU Copper transporter OS=Pseudomonas putida GN=cueA PE=3 SV=1  
BAC0305|pcoC|sp|Q47454|PCOC\_ECOLX Copper resistance protein C OS=Escherichia coli GN=pcoC PE=1 SV=1  
BAC0312|pitA|sp|P0AFJ7|PITA\_ECOLI Low-affinity inorganic phosphate transporter 1 OS=Escherichia coli (strain K12) GN=pitA PE=1 SV=1  
BAC0022|aioR|aoxR|tr|Q2VGB1|Q2VGB1\_RHIRD Putative transcriptional regulator OS=Rhizobium radiobacter GN=aioR PE=1 SV=1  
BAC0587|arsD|sp|P52148|ARSD2\_ECOLX Arsenical resistance operon trans-acting repressor ArsD OS=Escherichia coli (strain K12) GN=arsD PE=1 SV=1  
BAC0349|sitA|tr|Q9XCS2|Q9XCS2\_SALTI Iron transport protein, periplasmic-binding protein OS=Salmonella typhimurium GN=sitA PE=1 SV=1  
BAC0675|merP|tr|O07301|O07301\_9PSED Mercuric transport protein periplasmic component OS=Pseudomonas putida GN=merP PE=1 SV=1  
BAC0076|comR|ycfQ|sp|P75952|COMR\_ECOLI HTH-type transcriptional repressor ComR OS=Escherichia coli (strain K12) GN=comR PE=1 SV=1  
BAC0594|arsR|sp|P37309|ARSR\_ECOLI Arsenical resistance operon repressor OS=Escherichia coli (strain K12) GN=arsR PE=1 SV=1  
BAC0457|zinT|yodA|sp|P76344|ZINT\_ECOLI Metal-binding protein ZinT OS=Escherichia coli (strain K12) GN=zinT PE=1 SV=1  
BAC0164|fecE|sp|P15031|FECE\_ECOLI Fe(3+) dicitrate transport ATP-binding protein FecE OS=Escherichia coli (strain K12) GN=fecE PE=1 SV=1  
BAC0651|merA|sp|P0A0E5|MERA\_STAAU Mercuric reductase OS=Staphylococcus aureus GN=merA PE=1 SV=1  
BAC0254|mrdH|tr|Q88IN1|Q88IN1\_PSEPK Membrane protein, putative OS=Pseudomonas putida (strain KT244) GN=mrdH PE=1 SV=1  
BAC0134|dpr|dps|sp|P0CB53|DPS\_STRSU DNA protection during starvation protein OS=Streptococcus suis GN=dpr PE=1 SV=1  
BAC0306|pcoD|sp|Q47455|PCOD\_ECOLX Copper resistance protein D OS=Escherichia coli GN=pcoD PE=3 SV=1  
BAC0273|nikD|sp|P33593|NIKD\_ECOLI Nickel import ATP-binding protein NikD OS=Escherichia coli (strain K12) GN=nikD PE=1 SV=1  
BAC0253|mntR|sp|P0A9F1|MNTR\_ECOLI Transcriptional regulator MntR OS=Escherichia coli (strain K12) GN=mntR PE=1 SV=1  
BAC0591|arsR|sp|P52144|ARSR2\_ECOLX Arsenical resistance operon repressor OS=Escherichia coli GN=arsR PE=1 SV=1  
BAC0653|merA|tr|Q934S5|Q934S5\_THIFE Mercuric ion reductase OS=Thiobacillus ferrooxidans GN=merA PE=1 SV=1  
BAC0538|chrR|tr|Q7BD45|Q7BD45\_PSEPU Chromate reductase OS=Pseudomonas putida GN=chrR PE=4 SV=1  
BAC0309|pcoS|sp|Q47457|PCOS\_ECOLX Probable sensor protein PcoS OS=Escherichia coli GN=pcoS PE=3 SV=1  
BAC0203|cnrA|sp|P37972|CNRA\_RALME Nickel and cobalt resistance protein CnrA OS=Ralstonia metallidurans GN=cnrA PE=1 SV=1  
BAC0692|merT|tr|Q79BG6|Q79BG6\_PSEST MerT OS=Pseudomonas stutzeri GN=merT PE=4 SV=1  
BAC0298|pbrA|tr|Q58AJ6|Q58AJ6\_RALME P-type ATPase involved in Pb(II) resistance PbrA OS=Ralstonia metallidurans GN=pbrA PE=1 SV=1  
BAC0387|terB|sp|P18779|TERB\_ALCSP Tellurium resistance protein TerB OS=Alcaligenes sp. GN=terB PE=4 SV=1  
BAC0637|copS|tr|C6FFR5|C6FFR5\_PSEFL CopS OS=Pseudomonas fluorescens GN=copS PE=4 SV=1  
BAC0029|chrF|tr|A4UQR2|A4UQR2\_9RHIZ ChrF OS=Ochrobactrum tritici GN=chrF PE=4 SV=1  
BAC0109|cusC|ylcB|sp|P77211|CUSC\_ECOLI Cation efflux system protein CusC OS=Escherichia coli (strain K12) GN=cusC PE=1 SV=1  
BAC0679|merP|tr|O66047|O66047\_PSEST Mercury transport protein OS=Pseudomonas stutzeri GN=merP PE=4 SV=1  
BAC0285|nreB|tr|F0KND8|F0KND8\_ACICP NrsD, nreB nickel permease involved in nickel and cobalt tolerance OS=Alcaligenes sp. GN=nreB PE=1 SV=1  
BAC0233|merT|sp|P94185|MERT\_ALCSP Mercuric transport protein OS=Alcaligenes sp. GN=merT PE=3 SV=1  
BAC0645|mdtA|tr|D0ZND8|D0ZND8\_SALT1 Multidrug resistance protein MdtA OS=Salmonella typhimurium GN=mdtA PE=1 SV=1  
BAC0578|arsB|tr|O50594|O50594\_ACIMU ArsB OS=Acidiphilium multivorum GN=arsB PE=4 SV=1  
BAC0304|pcoB|sp|Q47453|PCOB\_ECOLX Copper resistance protein B OS=Escherichia coli GN=pcoB PE=4 SV=1  
BAC0138|dsbC|sp|P0AEG6|DSBC\_ECOLI Thiol:disulfide interchange protein DsbC OS=Escherichia coli (strain K12) GN=dsbC PE=1 SV=1  
BAC0275|nikR|sp|P0A6Z6|NIKR\_ECOLI Nickel-responsive regulator OS=Escherichia coli (strain K12) GN=nikR PE=1 SV=1  
BAC0274|nikE|sp|P33594|NIKE\_ECOLI Nickel import ATP-binding protein NikE OS=Escherichia coli (strain K12) GN=nikE PE=1 SV=1  
BAC0654|merB1|sp|P16172|MERB\_BACCE Alkylmercury lyase OS=Bacillus cereus GN=merB1 PE=3 SV=2  
BAC0330|rcnA|yohM|sp|P76425|RCNA\_ECOLI Nickel/cobalt efflux system RcnA OS=Escherichia coli (strain K12) GN=rcnA PE=1 SV=1  
BAC0433|ybtQ|tr|Q9Z375|Q9Z375\_YERPE Inner membrane ABC-transporter YbtQ OS=Yersinia pestis GN=ybtQ PE=1 SV=1  
BAC0630|copC|sp|P12376|COPC\_PSEUB Copper resistance protein C OS=Pseudomonas syringae pv. tomato GN=copC PE=1 SV=1  
BAC0661|merB2|tr|Q7DJN2|Q7DJN2\_BACME MerB2 OS=Bacillus megaterium GN=merB2 PE=4 SV=1  
BAC0447|yjaA|sp|P09162|YJAA\_ECOLI Uncharacterized protein YjaA OS=Escherichia coli (strain K12) GN=yjaA PE=1 SV=1  
BAC0293|ruvB|tr|B5L348|B5L348\_9PSED Malic enzyme family protein (Fragment) OS=Pseudomonas corrugata GN=ruvB PE=1 SV=1  
BAC0644|corD|sp|Q56017|APAG\_SALTY Protein ApaG OS=Salmonella typhimurium (strain LT2 / SGSC1412) GN=corD PE=1 SV=1

BAC0446|yhcN|sp|P64614|YHCN\_ECOLI Uncharacterized protein YhcN OS=Escherichia coli (strain K12) GN=  
BAC0119|czcA|sp|P13511|CZCA\_RALME Cobalt-zinc-cadmium resistance protein CzcA OS=Ralstonia metallid  
BAC0269|nia|tr|Q92Z60|Q92Z60\_RHIME Cation transport P-type ATPase OS=Rhizobium meliloti (strain 1021)  
BAC0028|chrC|tr|A4UQR3|A4UQR3\_9RHIZ Superoxide dismutase OS=Ochrobactrum tritici GN=chrC PE=3 SV=  
BAC0565|actR|sp|A6UEL7|ACTR\_SINMW Acid tolerance regulatory protein ActR OS=Sinorhizobium medicae  
BAC0023|aioS|aoxS|tr|Q2VGB2|Q2VGB2\_RHIRD Putative sensor histidine kinase OS=Rhizobium radiobacter  
BAC0254|mrdH|tr|Q88IN1|Q88IN1\_PSEPK Membrane protein, putative OS=Pseudomonas putida (strain KT244  
BAC0049|bhsA|ycfR|comC|sp|P0AB40|BHSA\_ECOLI Multiple stress resistance protein BhsA OS=Escherichia  
BAC0549|nccA|sp|Q44586|NCCA\_ALCXX Nickel-cobalt-cadmium resistance protein NccA OS=Alcaligenes xy  
BAC0120|czcB|sp|P13510|CZCB\_RALME Cobalt-zinc-cadmium resistance protein CzcB OS=Ralstonia metallid  
BAC0389|terD|sp|P18781|TERD\_ALCSP Tellurium resistance protein TerD OS=Alcaligenes sp. GN=terD PE=3  
BAC0087|mgtA|sp|P0ABB8|ATMA\_ECOLI Magnesium-transporting ATPase, P-type 1 OS=Escherichia coli (str  
BAC0063|chrA|sp|P14285|CHRA\_PSEAI Chromate transport protein OS=Pseudomonas aeruginosa GN=chrA PE  
BAC0434|ychH|sp|P0AB49|YCHH\_ECOLI Uncharacterized protein YchH OS=Escherichia coli (strain K12) GN  
BAC0263|ncrA|tr|Q06VT3|Q06VT3\_9BACT NcrA OS=Leptospirillum ferriphilum GN=ncrA PE=4 SV=1  
BAC0305|pcoC|sp|Q47454|PCOC\_ECOLX Copper resistance protein C OS=Escherichia coli GN=pcoC PE=1 SV  
BAC0304|pcoB|sp|Q47453|PCOB\_ECOLX Copper resistance protein B OS=Escherichia coli GN=pcoB PE=4 SV  
BAC0583|arsC|sp|P52147|ARSC2\_ECOLX Arsenate reductase OS=Escherichia coli GN=arsC PE=3 SV=1  
BAC0666|merD|tr|O66018|O66018\_PSEST MerD OS=Pseudomonas stutzeri GN=merD PE=4 SV=1  
BAC0348|silS|sp|Q9ZHD4|SILS\_SALTM Probable sensor kinase SilS OS=Salmonella typhimurium GN=silS PE  
BAC0027|chrB|tr|A4UQR5|A4UQR5\_9RHIZ ChrB OS=Ochrobactrum tritici GN=chrB PE=4 SV=1  
BAC0113|cutA|sp|P69488|CUTA\_ECOLI Divalent-cation tolerance protein CutA OS=Escherichia coli (strain K1  
BAC0022|aioR|aoxR|tr|Q2VGB1|Q2VGB1\_RHIRD Putative transcriptional regulator OS=Rhizobium radiobacter  
BAC0568|actP|sp|Q9X5V3|ATCU\_RHILV Copper-transporting P-type ATPase OS=Rhizobium leguminosarum  
BAC0182|golS|tr|Q8ZRG6|Q8ZRG6\_SALTY Putative transcriptional regulator OS=Salmonella typhimurium (str  
BAC0673|merE|sp|P06690|MERE\_PSEAI Uncharacterized mercuric resistance protein MerE OS=Pseudomonas  
BAC0620|copA|sp|P32113|COPA\_ENTHA Probable copper-importing P-type ATPase A OS=Enterococcus hirae  
BAC0309|pcoS|sp|Q47457|PCOS\_ECOLX Probable sensor protein PcoS OS=Escherichia coli GN=pcoS PE=3 SV  
BAC0343|silC|sp|Q9ZHD2|SILC\_SALTM Probable outer membrane lipoprotein SilC OS=Salmonella typhimuri  
BAC0659|merB|sp|P08664|MERB\_SERMA Alkylmercury lyase OS=Serratia marcescens GN=merB PE=3 SV=1  
BAC0083|copR|sp|Q02540|COPR\_PSEUB Transcriptional activator protein CopR OS=Pseudomonas syringae pv  
BAC0355|ruvB|sp|Q51426|RUVB\_PSEAE Holliday junction ATP-dependent DNA helicase RuvB OS=Pseudom  
BAC0625|copA|tr|F4ZCZ9|F4ZCZ9\_9XANT Copper resistance protein A OS=Xanthomonas alfalfae subsp. citru  
BAC0614|cmeC|tr|Q8RTE3|Q8RTE3\_CAMJU CmeC OS=Campylobacter jejuni GN=cmeC PE=4 SV=1  
BAC0264|ncrB|tr|Q06VT2|Q06VT2\_9BACT NcrB OS=Leptospirillum ferriphilum GN=ncrB PE=4 SV=1  
BAC0597|baeS|tr|D0ZNE2|D0ZNE2\_SALT1 Signal transduction histidine-protein kinase BaeS OS=Salmonella t  
BAC0352|sitD|tr|Q9XCR9|Q9XCR9\_SALTM SitD OS=Salmonella typhimurium GN=sitD PE=3 SV=1  
BAC0670|merE|tr|Q52104|Q52104\_9ZZZZ Uncharacterized protein OS=Plasmid pDU1358 PE=4 SV=1  
BAC0387|terB|sp|P18779|TERB\_ALCSP Tellurium resistance protein TerB OS=Alcaligenes sp. GN=terB PE=4  
BAC0302|pbrT|tr|Q5GR69|Q5GR69\_ALCXX Lead uptake protein PbrT OS=Alcaligenes xylosoxydans xylosoxy  
BAC0357|recG|tr|B5L350|B5L350\_9PSED ATP-dependent DNA helicase (Fragment) OS=Pseudomonas corruga  
BAC0356|recG|tr|Q9HTL3|Q9HTL3\_PSEAE ATP-dependent DNA helicase RecG OS=Pseudomonas aeruginosa  
BAC0293|ruvB|tr|B5L348|B5L348\_9PSED Malic enzyme family protein (Fragment) OS=Pseudomonas corruga  
BAC0469|zupT|ygiE|sp|P0A8H3|ZUPT\_ECOLI Zinc transporter ZupT OS=Escherichia coli (strain K12) GN=zu  
BAC0350|sitB|tr|Q9XCS1|Q9XCS1\_SALTM SitB OS=Salmonella typhimurium GN=sitB PE=3 SV=1  
BAC0358|oscA|tr|B6CM35|B6CM35\_9PSED Putative uncharacterized protein oscA OS=Pseudomonas corrugata

BAC0388|terC|sp|P18780|TERC\_ALCSP Tellurium resistance protein TerC OS=Alcaligenes sp. GN=terC PE=3  
BAC0181|glpF|sp|P0AER0|GLPF\_ECOLI Glycerol uptake facilitator protein OS=Escherichia coli (strain K12) GN=glpF PE=3 SV=1  
BAC0386|terA|sp|P18778|TERA\_ALCSP Tellurium resistance protein TerA OS=Alcaligenes sp. GN=terA PE=4  
BAC0548|chrA1|sp|P17551|CHRA1\_RALME Chromate transport protein OS=Ralstonia metallidurans (strain CH)  
BAC0035|arsM|tr|Q6N3Y0|Q6N3Y0\_RHOPA UbiE/COQ5 methyltransferase OS=Rhodopseudomonas palustris  
BAC0441|yfeC|sp|Q56954|YFEC\_YERPE Chelated iron transport system membrane protein YfeC OS=Yersinia  
BAC0105|cueR|ybbI|sp|P0A9G4|CUER\_ECOLI HTH-type transcriptional regulator CueR OS=Escherichia coli (strain K12) GN=cueR PE=3 SV=1  
BAC0224|merA|sp|P16171|MERA\_BACCE Mercuric reductase OS=Bacillus cereus GN=merA PE=1 SV=1  
BAC0133|dnaK|sp|P0A5B9|DNAK\_MYCTU Chaperone protein DnaK OS=Mycobacterium tuberculosis GN=dnaK PE=3 SV=1  
BAC0124|czcP|tr|Q1LAJ7|Q1LAJ7\_RALME CzcP cation efflux P1-ATPase OS=Ralstonia metallidurans (strain CH)  
BAC0644|corD|sp|Q56017|APAG\_SALTY Protein ApaG OS=Salmonella typhimurium (strain LT2 / SGSC1412) GN=corD PE=3 SV=1  
BAC0059|cadX|tr|A7LHQ4|A7LHQ4\_STRSL CadX OS=Streptococcus salivarius GN=cadX PE=4 SV=1  
BAC0695|merT|sp|P13112|MERT\_SERMA Mercuric transport protein OS=Serratia marcescens GN=merT PE=4  
BAC0030|arsA|sp|P52145|ARSA2\_ECOLX Arsenical pump-driving ATPase OS=Escherichia coli GN=arsA PE=3 SV=1  
BAC0251|mntH|yfeP|sp|P0A769|MNTH\_ECOLI Divalent metal cation transporter MntH OS=Escherichia coli (strain K12) GN=mntH PE=3 SV=1  
BAC0351|sitC|tr|Q9XCS0|Q9XCS0\_SALTM SitC OS=Salmonella typhimurium GN=sitC PE=3 SV=1  
BAC0183|golT|tr|Q8ZRG7|Q8ZRG7\_SALTY Putative cation transport ATPase OS=Salmonella typhimurium (strain LT2) GN=golT PE=3 SV=1  
BAC0318|pstS|sp|P0AG82|PSTS\_ECOLI Phosphate-binding protein PstS OS=Escherichia coli (strain K12) GN=pstS PE=3 SV=1  
BAC0649|merA|tr|E3VST6|E3VST6\_9FLAO MerA OS=Tenacibaculum discolor GN=merA PE=3 SV=1  
BAC0108|cusB|sp|P77239|CUSB\_ECOLI Cation efflux system protein CusB OS=Escherichia coli (strain K12) GN=cusB PE=3 SV=1  
BAC0003|acn|tr|O53166|O53166\_MYCTU Aconitate hydratase OS=Mycobacterium tuberculosis H37Rv GN=acn PE=3 SV=1  
BAC0135|dpsA|tr|Q8KR86|Q8KR86\_BURPE DpsA OS=Burkholderia pseudomallei GN=dpsA PE=3 SV=1  
BAC0034|arsH|tr|E8PS81|E8PS81\_YERPE Arsenic resistance protein ArsH OS=Yersinia pestis Java 9 GN=arsH PE=3 SV=1  
BAC0306|pcoD|sp|Q47455|PCOD\_ECOLX Copper resistance protein D OS=Escherichia coli GN=pcoD PE=3 SV=1  
BAC0106|cuiD|sp|Q8ZRS2|CUEO\_SALTY Blue copper oxidase CueO OS=Salmonella typhimurium (strain LT2) GN=cuiD PE=3 SV=1  
BAC0648|merA|sp|P08662|MERA\_SERMA Mercuric reductase (Fragments) OS=Serratia marcescens GN=merA PE=3 SV=1  
BAC0161|fbpB|sp|P71338|FBPB2\_HAEIN Fe(3+)-transport system permease protein FbpB 2 OS=Haemophilus influenzae (strain ATCC 49619) GN=fbpB PE=3 SV=1  
BAC0312|pitA|sp|P0AFJ7|PITA\_ECOLI Low-affinity inorganic phosphate transporter 1 OS=Escherichia coli (strain K12) GN=pitA PE=3 SV=1  
BAC0458|zipB|tr|Q7WJT8|Q7WJT8\_BORBR Putative membrane protein OS=Bordetella bronchiseptica (strain ATCC 49619) GN=zipB PE=3 SV=1  
BAC0383|tcrB|tr|Q8VPE6|Q8VPE6\_ENTFC TerB OS=Enterococcus faecium GN=tcrB PE=3 SV=1  
BAC0587|arsD|sp|P52148|ARSD2\_ECOLX Arsenical resistance operon trans-acting repressor ArsD OS=Escherichia coli (strain K12) GN=arsD PE=3 SV=1  
BAC0252|mntP|yebN|sp|P76264|MNTP\_ECOLI Probable manganese efflux pump MntP OS=Escherichia coli (strain K12) GN=mntP PE=3 SV=1  
BAC0088|corC|sp|P0A2L3|CORC\_SALTY Magnesium and cobalt efflux protein CorC OS=Salmonella typhimurium (strain LT2) GN=corC PE=3 SV=1  
BAC0653|merA|tr|Q934S5|Q934S5\_THIFE Mercuric ion reductase OS=Thiobacillus ferrooxidans GN=merA PE=3 SV=1  
BAC0303|pcoA|sp|Q47452|PCOA\_ECOLX Copper resistance protein A OS=Escherichia coli GN=pcoA PE=3 SV=1  
BAC0056|cadC|sp|P20047|CADC\_STAAU Cadmium resistance transcriptional regulatory protein CadC OS=Staphylococcus aureus (strain ATCC 29218) GN=cadC PE=3 SV=1  
BAC0640|copD|tr|C6FFR7|C6FFR7\_PSEFL CopD OS=Pseudomonas fluorescens GN=copD PE=4 SV=1  
BAC0461|zntA|yhhO|sp|P37617|ATZN\_ECOLI Lead, cadmium, zinc and mercury-transporting ATPase OS=Escherichia coli (strain K12) GN=zntA PE=3 SV=1  
BAC0272|nikC|sp|P0AFA9|NIKC\_ECOLI Nickel transport system permease protein NikC OS=Escherichia coli (strain K12) GN=nikC PE=3 SV=1  
BAC0662|merB3|tr|Q9RHR0|Q9RHR0\_BACME MerB3 OS=Bacillus megaterium GN=merB3 PE=4 SV=2  
BAC0275|nikR|sp|P0A6Z6|NIKR\_ECOLI Nickel-responsive regulator OS=Escherichia coli (strain K12) GN=nikR PE=3 SV=1  
BAC0315|pstA|sp|P07654|PSTA\_ECOLI Phosphate transport system permease protein PstA OS=Escherichia coli (strain K12) GN=pstA PE=3 SV=1  
BAC0631|copC|tr|F4ZBX9|F4ZBX9\_XANCI CopC OS=Xanthomonas citri subsp. citri GN=copC PE=4 SV=1  
BAC0167|fieF|yqip|sp|P69380|FIEF\_ECOLI Ferrous-iron efflux pump FieF OS=Escherichia coli (strain K12) GN=fieF PE=3 SV=1  
BAC0639|copC|tr|C6FFR6|C6FFR6\_PSEFL CopC OS=Pseudomonas fluorescens GN=copC PE=4 SV=1  
BAC0463|znuA|yebL|sp|P39172|ZNUA\_ECOLI High-affinity zinc uptake system protein ZnuA OS=Escherichia coli (strain K12) GN=znuA PE=3 SV=1

BAC0102|cueA|tr|Q8KWW2|Q8KWW2\_PSEPU Copper transporter OS=Pseudomonas putida GN=cueA PE=3 SV=1  
BAC0619|copA|tr|Q7WYH1|Q7WYH1\_PSEPU CopA OS=Pseudomonas putida GN=copA PE=4 SV=1  
BAC0115|cutE|Int|sp|P23930|LNT\_ECOLI Apolipoprotein N-acyltransferase OS=Escherichia coli (strain K12) GN=cutE PE=3 SV=1  
BAC0082|copL|tr|Q5YKV8|Q5YKV8\_9XANT CopL OS=Xanthomonas perforans GN=copL PE=4 SV=1  
BAC0470|zur|yjbK|sp|P0AC51|ZUR\_ECOLI Zinc uptake regulation protein OS=Escherichia coli (strain K12) GN=zur PE=3 SV=1  
BAC0265|ncrC|tr|D5CKG5|D5CKG5\_ENTCC Nickel-resistant membrane protein-like protein NcrC OS=Enterobacteriaceae GN=ncrC PE=3 SV=1  
BAC0668|merD|tr|Q5NUV1|Q5NUV1\_RALME MerD from Tn4378, regulatory protein involved in Hg(II) resistance OS=Escherichia coli (strain K12) GN=merD PE=3 SV=1  
BAC0316|pstB|sp|P0AAH0|PSTB\_ECOLI Phosphate import ATP-binding protein PstB OS=Escherichia coli (strain K12) GN=pstB PE=3 SV=1  
BAC0040|baeS|sp|P30847|BAES\_ECOLI Signal transduction histidine-protein kinase BaeS OS=Escherichia coli (strain K12) GN=baeS PE=3 SV=1  
BAC0457|zinT|yodA|sp|P76344|ZINT\_ECOLI Metal-binding protein ZinT OS=Escherichia coli (strain K12) GN=zinT PE=3 SV=1  
BAC0092|corT|coaT|tr|H0P0Y3|H0P0Y3\_9SYNC Cation-transporting ATPase E1-E2 ATPase OS=Synechocystis sp. (strain PCC 6803) GN=corT PE=3 SV=1  
BAC0231|merP|sp|P13113|MERP\_SERMA Mercuric transport protein periplasmic component OS=Serratia marcescens GN=merP PE=3 SV=1  
BAC0459|zitB|ybgR|sp|P75757|ZITB\_ECOLI Zinc transporter ZitB OS=Escherichia coli (strain K12) GN=zitB PE=3 SV=1  
BAC0330|rcnA|yohM|sp|P76425|RCNA\_ECOLI Nickel/cobalt efflux system RcnA OS=Escherichia coli (strain K12) GN=rcnA PE=3 SV=1  
BAC0138|dsbC|sp|P0AEG6|DSBC\_ECOLI Thiol:disulfide interchange protein DsbC OS=Escherichia coli (strain K12) GN=dsbC PE=3 SV=1  
BAC0573|arsB|sp|P45946|ARSB\_BACSU Arsenite resistance protein ArsB OS=Bacillus subtilis (strain 168) GN=arsB PE=3 SV=1  
BAC0540|nfsA|sp|P17117|NFSA\_ECOLI Oxygen-insensitive NADPH nitroreductase OS=Escherichia coli (strain K12) GN=nfsA PE=3 SV=1  
BAC0125|czcR|sp|Q44006|CZCR\_RALME Transcriptional activator protein CzcR OS=Ralstonia metallidurans (strain ATCC 35061) GN=czcR PE=3 SV=1  
BAC0169|fpvA|sp|P48632|FPVA\_PSEAE Ferripyoverdine receptor OS=Pseudomonas aeruginosa (strain ATCC 27802) GN=fpvA PE=3 SV=1  
BAC0610|modB|sp|P0AF01|MODB\_ECOLI Molybdenum transport system permease protein ModB OS=Escherichia coli (strain K12) GN=modB PE=3 SV=1  
BAC0162|fbpC|sp|P44513|FBPC2\_HAEIN Fe(3+) ions import ATP-binding protein FbpC 2 OS=Haemophilus influenzae (strain ATCC 49619) GN=fbpC PE=3 SV=1  
BAC0201|kmtR|sp|O53838|KMTR\_MYCTU HTH-type transcriptional regulator KmtR OS=Mycobacterium tuberculosis (strain H37Rv) GN=kmtR PE=3 SV=1  
BAC0652|merA|tr|O66017|O66017\_PSEST MerA OS=Pseudomonas stutzeri GN=merA PE=4 SV=1  
BAC0109|cusC|ylcB|sp|P77211|CUSC\_ECOLI Cation efflux system protein CusC OS=Escherichia coli (strain K12) GN=cusC PE=3 SV=1  
BAC0464|znuB|yebI|sp|P39832|ZNUB\_ECOLI High-affinity zinc uptake system membrane protein ZnuB OS=Escherichia coli (strain K12) GN=znuB PE=3 SV=1  
BAC0344|silE|sp|Q9Z4N3|SILE\_SALTM Silver-binding protein SilE OS=Salmonella typhimurium GN=silE PE=3 SV=1  
BAC0168|fptA|sp|P42512|FPTA\_PSEAE Fe(3+)-pyochelin receptor OS=Pseudomonas aeruginosa (strain ATCC 27802) GN=fptA PE=3 SV=1  
BAC0190|hmrR|sp|Q9X5X4|HMRR\_SINMW HTH-type transcriptional regulator HmrR OS=Sinorhizobium medicae (strain ATCC 49411) GN=hmrR PE=3 SV=1  
BAC0570|actP|tr|D5AU53|D5AU53\_RHO�B Cation/acetate symporter ActP-1 OS=Rhodobacter capsulatus (strain ATCC 49239) GN=actP PE=3 SV=1  
BAC0345|silF|tr|Q9ZHD1|Q9ZHD1\_SALTM Uncharacterized protein OS=Salmonella typhimurium GN=ORF96 PE=3 SV=1  
BAC0588|arsR|tr|P74986|P74986\_YEREN Arsenite inducible repressor OS=Yersinia enterocolitica GN=arsR PE=3 SV=1  
BAC0112|cusS|sp|P77485|CUSS\_ECOLI Sensor kinase CusS OS=Escherichia coli (strain K12) GN=cusS PE=1 SV=1  
BAC0307|pcoE|sp|Q47459|PCOE\_ECOLDX Probable copper-binding protein PcoE OS=Escherichia coli GN=pcoE PE=3 SV=1  
BAC0646|mdtB|tr|D0ZND9|D0ZND9\_SALT1 Multidrug resistance protein MdtB OS=Salmonella typhimurium GN=mdtB PE=3 SV=1  
BAC0643|corB|tr|Q9X621|Q9X621\_SALTM CorB OS=Salmonella typhimurium GN=corB PE=4 SV=1  
BAC0368|sodA|sp|P00448|SODM\_ECOLI Superoxide dismutase [Mn] OS=Escherichia coli (strain K12) GN=sodA PE=3 SV=1  
BAC0579|arsB|sp|P74311|Y944\_SYNY3 Uncharacterized transporter slr0944 OS=Synechocystis sp. (strain PCC 6803) GN=arsB PE=3 SV=1  
BAC0270|nikA|sp|P33590|NIKA\_ECOLI Nickel-binding periplasmic protein OS=Escherichia coli (strain K12) GN=nikA PE=3 SV=1  
BAC0442|yfeD|sp|Q56955|YFED\_YERPE Chelated iron transport system membrane protein YfeD OS=Yersinia enterocolitica GN=yfeD PE=3 SV=1  
BAC0584|arsC|sp|O50595|ARSC\_ACIMA Arsenate reductase OS=Acidiphilium multivorum (strain DSM 11245) GN=arsC PE=3 SV=1  
BAC0077|copA|sp|P12374|COPA\_PSEUB Copper resistance protein A OS=Pseudomonas syringae pv. tomato GN=copA PE=3 SV=1  
BAC0273|nikD|sp|P33593|NIKD\_ECOLI Nickel import ATP-binding protein NikD OS=Escherichia coli (strain K12) GN=nikD PE=3 SV=1  
BAC0390|terE|sp|P18782|TERE\_ALCSP Tellurium resistance protein TerE OS=Alcaligenes sp. GN=terE PE=3 SV=1  
BAC0078|copA|sp|O32220|COPA\_BACSU Copper-exporting P-type ATPase A OS=Bacillus subtilis (strain 168) GN=copA PE=3 SV=1  
BAC0678|merP|tr|O66016|O66016\_PSEST MerP OS=Pseudomonas stutzeri GN=merP PE=4 SV=1  
BAC0029|chrF|tr|A4UQR2|A4UQR2\_9RHIZ ChrF OS=Ochrobactrum tritici GN=chrF PE=4 SV=1



BAC0116|cutF|nlpE|sp|P40710|NLPE\_ECOLI Lipoprotein NlpE OS=Escherichia coli (strain K12) GN=nlpE PE=4 SV=1  
BAC0455|ziaA|sp|Q59998|ATZN\_SYNY3 Zinc-transporting ATPase OS=Synechocystis sp. (strain PCC 6803 / FACHS-1) GN=ziaA PE=4 SV=1  
BAC0031|arsB|sp|P08691|ARSB1\_ECOLX Arsenical pump membrane protein OS=Escherichia coli GN=arsB PE=4 SV=1  
BAC0611|modC|sp|P09833|MODC\_ECOLI Molybdenum import ATP-binding protein ModC OS=Escherichia coli (strain K12) GN=modC PE=4 SV=1  
BAC0541|yieF|sp|P0AGE6|YIEF\_ECOLI Uncharacterized protein YieF OS=Escherichia coli (strain K12) GN=yieF PE=4 SV=1  
BAC0661|merB2|tr|Q7DJN2|Q7DJN2\_BACME MerB2 OS=Bacillus megaterium GN=merB2 PE=4 SV=1  
BAC0683|merR1|tr|O07300|O07300\_9PSED Mercuric resistance operon regulatory protein OS=Pseudomonas sp. K-62 GN=merR1 PE=4 SV=1  
BAC0650|merA|tr|O08449|O08449\_9PSED Mercuric reductase OS=Pseudomonas sp. K-62 GN=merA PE=4 SV=1  
BAC0203|cnrA|sp|P37972|CNRA\_RALME Nickel and cobalt resistance protein CnrA OS=Ralstonia metallidurans GN=cnrA PE=4 SV=1  
BAC0638|copR|tr|C6FFR4|C6FFR4\_PSEFL CopR OS=Pseudomonas fluorescens GN=copR PE=4 SV=1  
BAC0686|merR|sp|P13111|MERR\_SERMA Mercuric resistance operon regulatory protein OS=Serratia marcescens GN=merR PE=4 SV=1  
BAC0334|robA|sp|P0ACI0|ROB\_ECOLI Right origin-binding protein OS=Escherichia coli (strain K12) GN=robA PE=4 SV=1  
BAC0440|yfeB|sp|Q56953|YFEB\_YERPE Chelated iron transport system membrane protein YfeB OS=Yersinia pestis GN=yfeB PE=4 SV=1  
BAC0228|merF|tr|Q2QCN0|Q2QCN0\_9PSED MerF OS=Pseudomonas sp. CT14 GN=merF PE=4 SV=1  
BAC0266|ncrY|tr|Q06VT0|Q06VT0\_9BACT NcrY OS=Leptospirillum ferriphilum GN=ncrY PE=4 SV=1  
BAC0612|perO|tr|D5AQ60|D5AQ60\_RHOCE Divalent ion symporter OS=Rhodobacter capsulatus (strain ATCC 49616) GN=perO PE=4 SV=1  
BAC0591|arsR|sp|P52144|ARSR2\_ECOLX Arsenical resistance operon repressor OS=Escherichia coli GN=arsR PE=4 SV=1  
BAC0679|merP|tr|O66047|O66047\_PSEST Mercury transport protein OS=Pseudomonas stutzeri GN=merP PE=4 SV=1  
BAC0165|fetA/ybbL|sp|P77279|YBBL\_ECOLI Uncharacterized ABC transporter ATP-binding protein YbbL OS=Escherichia coli (strain K12) GN=fetA/ybbL PE=4 SV=1  
BAC0645|mdtA|tr|D0ZND8|D0ZND8\_SALT1 Multidrug resistance protein MdtA OS=Salmonella typhimurium GN=mdtA PE=4 SV=1  
BAC0277|nirB|tr|Q6RUG2|Q6RUG2\_KLEOX NirB OS=Klebsiella oxytoca GN=nirB PE=4 SV=1  
BAC0298|pbrA|tr|Q58AJ6|Q58AJ6\_RALME P-type ATPase involved in Pb(II) resistance PbrA OS=Ralstonia metallidurans GN=pbrA PE=4 SV=1  
BAC0240|mexI|tr|Q9HWH4|Q9HWH4\_PSEAE Probable Resistance-Nodulation-Cell Division (RND) efflux transporter OS=Escherichia coli (strain K12) GN=mexI PE=4 SV=1  
BAC0166|fetB/ybbM|sp|P77307|YBBM\_ECOLI UPF0014 inner membrane protein YbbM OS=Escherichia coli (strain K12) GN=fetB/ybbM PE=4 SV=1  
BAC0274|nikE|sp|P33594|NIKE\_ECOLI Nickel import ATP-binding protein NikE OS=Escherichia coli (strain K12) GN=nikE PE=4 SV=1  
BAC0698|ncrA|tr|Q1KLR2|Q1KLR2\_SERMA NcrA OS=Serratia marcescens GN=ncrA PE=4 SV=1  
BAC0229|merG|tr|O07302|O07302\_9PSED Mercuric resistance protein OS=Pseudomonas sp. K-62 GN=merG PE=4 SV=1  
BAC0341|silA|sp|Q9ZHC9|SILA\_SALTM Putative cation efflux system protein SilA OS=Salmonella typhimurium GN=silA PE=4 SV=1  
BAC0349|sitA|tr|Q9XCS2|Q9XCS2\_SALTI Iron transport protein, periplasmic-binding protein OS=Salmonella typhimurium GN=sitA PE=4 SV=1  
BAC0107|cusA/ybdE|sp|P38054|CUSA\_ECOLI Cation efflux system protein CusA OS=Escherichia coli (strain K12) GN=cusA/ybdE PE=4 SV=1  
BAC0114|cutC|sp|P67826|CUTC\_ECOLI Copper homeostasis protein CutC OS=Escherichia coli (strain K12) GN=cutC PE=4 SV=1  
BAC0699|ncrB|tr|Q1KLR1|Q1KLR1\_SERMA NcrB OS=Serratia marcescens GN=ncrB PE=4 SV=1  
BAC0432|ybtP|tr|Q9R7V3|Q9R7V3\_YERPE Lipoprotein inner membrane ABC-transporter OS=Yersinia pestis GN=ybtP PE=4 SV=1  
BAC0439|yfeA|sp|Q56952|YFEA\_YERPE Periplasmic chelated iron-binding protein YfeA OS=Yersinia pestis GN=yfeA PE=4 SV=1  
BAC0384|tehA|sp|P25396|TEHA\_ECOLI Tellurite resistance protein TehA OS=Escherichia coli (strain K12) GN=tehA PE=4 SV=1  
BAC0707|sodB|sp|P0AGD3|SODF\_ECOLI Superoxide dismutase [Fe] OS=Escherichia coli (strain K12) GN=sodB PE=4 SV=1  
BAC0271|nikB|sp|P33591|NIK\_B\_ECOLI Nickel transport system permease protein NikB OS=Escherichia coli (strain K12) GN=nikB PE=4 SV=1  
BAC0317|pstC|sp|P0AGH8|PSTC\_ECOLI Phosphate transport system permease protein PstC OS=Escherichia coli (strain K12) GN=pstC PE=4 SV=1  
BAC0137|dsbB|sp|P0A6M2|DSBB\_ECOLI Disulfide bond formation protein B OS=Escherichia coli (strain K12) GN=dsbB PE=4 SV=1  
BAC0308|pcoR|sp|Q47456|PCOR\_ECOLX Transcriptional regulatory protein PcoR OS=Escherichia coli GN=pcoR PE=4 SV=1  
BAC0447|yjaA|sp|P09162|YJAA\_ECOLI Uncharacterized protein YjaA OS=Escherichia coli (strain K12) GN=yjaA PE=4 SV=1  
BAC0285|nreB|tr|F0KND8|F0KND8\_ACICP NrsD, nreB nickel permease involved in nickel and cobalt tolerance OS=Escherichia coli (strain K12) GN=nreB PE=4 SV=1  
BAC0688|merR2|tr|Q79B70|Q79B70\_PSEST Organomercurial resistance regulatory protein OS=Pseudomonas stutzeri GN=merR2 PE=4 SV=1  
BAC0685|merR|tr|H6WCN2|H6WCN2\_9FLAO MerR OS=Tenacibaculum discolor GN=merR PE=4 SV=1  
BAC0572|arsA|sp|P08690|ARSA1\_ECOLX Arsenical pump-driving ATPase OS=Escherichia coli GN=arsA PE=4 SV=1  
BAC0687|merR|tr|Q79BG7|Q79BG7\_PSEST MerR OS=Pseudomonas stutzeri GN=merR PE=4 SV=1

BAC0641|corA|sp|P0A2R8|CORA\_SALTY Magnesium transport protein CorA OS=Salmonella typhimurium (str  
BAC0255|mreA|tr|Q88IN0|Q88IN0\_PSEPK Putative uncharacterized protein OS=Pseudomonas putida (strain KT  
BAC0039|baeR|sp|P69228|BAER\_ECOLI Transcriptional regulatory protein BaeR OS=Escherichia coli (strain K  
BAC0577|arsB|sp|P74985|ARSB\_YEREN Arsenical pump membrane protein OS=Yersinia enterocolitica GN=ar  
BAC0691|merT|tr|Q52397|Q52397\_PSEST Mercury transport protein OS=Pseudomonas stutzeri GN=merT PE=4  
BAC0276|nirA|tr|Q6RUG3|Q6RUG3\_KLEOX NirA OS=Klebsiella oxytoca GN=nirA PE=4 SV=1  
BAC0267|nczA|tr|B8GZE9|B8GZE9\_CAUCN Cobalt-zinc-cadmium resistance protein czcA OS=Caulobacter cro  
BAC0391|terW|sp|P75010|TERW\_SERMA Tellurium resistance protein TerW OS=Serratia marcescens GN=terW  
BAC0596|baeR|tr|D0ZNE3|D0ZNE3\_SALT1 DNA-binding transcriptional regulator BaeR OS=Salmonella typhi  
BAC0446|yhcN|sp|P64614|YHCN\_ECOLI Uncharacterized protein YhcN OS=Escherichia coli (strain K12) GN=  
BAC0563|acrD|tr|Q8ZN77|Q8ZN77\_SALTY RND family aminoglycoside/multidrug efflux pump OS=Salmonell  
BAC0098|ctpC|sp|P0A502|CTPC\_MYCTU Probable manganese/zinc-exporting P-type ATPase OS=Mycobacteri  
BAC0179|gesB|tr|Q8ZRG9|Q8ZRG9\_SALTY Putative cation efflux system protein OS=Salmonella typhimurium  
BAC0451|yodD|sp|P64519|YODD\_ECOLI Uncharacterized protein YodD OS=Escherichia coli (strain K12) GN=  
BAC0667|merD|sp|P08654|MERD\_SERMA HTH-type transcriptional regulator MerD OS=Serratia marcescens C  
BAC0609|modA|sp|P37329|MODA\_ECOLI Molybdate-binding periplasmic protein OS=Escherichia coli (strain  
BAC0621|copA|tr|F4ZBX3|F4ZBX3\_XANCI CopA OS=Xanthomonas citri subsp. citri GN=copA PE=4 SV=1  
BAC0627|copB|tr|F4ZD00|F4ZD00\_9XANT Copper resistance protein B OS=Xanthomonas alfalfae subsp. citru  
BAC0342|silB|sp|Q9ZHD0|SILB\_SALTM Putative membrane fusion protein SilB OS=Salmonella typhimurium  
BAC0026|chrA|tr|A4UQR4|A4UQR4\_9RHIZ Chromate transporter OS=Ochrobactrum tritici GN=chrA PE=4 SV  
BAC0058|cadR|tr|Q93TP7|Q93TP7\_PSEPU CadR OS=Pseudomonas putida GN=cadR PE=4 SV=1  
BAC0130|czrA|tr|Q9RLI8|Q9RLI8\_PSEAI CzrA protein OS=Pseudomonas aeruginosa GN=czrA PE=4 SV=1  
BAC0689|merR|tr|Q934S8|Q934S8\_THIFE Mer operon regulatory protein OS=Thiobacillus ferrooxidans GN=m  
BAC0462|zntR/yhdM|sp|P0ACS5|ZNTR\_ECOLI HTH-type transcriptional regulator ZntR OS=Escherichia coli (  
BAC0647|mdtC|tr|D0ZNE0|D0ZNE0\_SALT1 Multidrug resistance protein MdtC OS=Salmonella typhimurium (  
BAC0576|arsB|sp|P52146|ARSB2\_ECOLX Arsenical pump membrane protein OS=Escherichia coli GN=arsB PE  
BAC0684|merR2|tr|Q7DKL2|Q7DKL2\_9PSED MerR2 OS=Pseudomonas sp. K-62 GN=merR2 PE=4 SV=1  
BAC0171|furA|sp|P0A582|FURA\_MYCTU Transcriptional regulator FurA OS=Mycobacterium tuberculosis GN  
BAC0163|fecD|sp|P15029|FECD\_ECOLI Fe(3+) dicitrate transport system permease protein FecD OS=Escherich  
BAC0608|modE|sp|P0A9G8|MODE\_ECOLI Transcriptional regulator ModE OS=Escherichia coli (strain K12) G  
BAC0642|mgtA|sp|P36640|ATMA\_SALTY Magnesium-transporting ATPase, P-type 1 OS=Salmonella typhimu  
BAC0066|chrF|tr|Q5NUZ7|Q5NUZ7\_RALME ChrF, regulatory protein, involved in Chromate resistance OS=Ra  
BAC0672|merE|tr|Q79BE4|Q79BE4\_PSEST Urf1 OS=Pseudomonas stutzeri PE=4 SV=1  
BAC0467|zraR/hydH|sp|P14375|ZRAR\_ECOLI Transcriptional regulatory protein ZraR OS=Escherichia coli (str  
BAC0498|ideR|sp|P0A672|IDER\_MYCTU Iron-dependent repressor IdeR OS=Mycobacterium tuberculosis GN=  
BAC0103|cueO|sp|P36649|CUEO\_ECOLI Blue copper oxidase CueO OS=Escherichia coli (strain K12) GN=cue  
BAC0371|soxS|sp|P0A9E2|SOXS\_ECOLI Regulatory protein SoxS OS=Escherichia coli (strain K12) GN=soxS  
BAC0594|arsR|sp|P37309|ARSR\_ECOLI Arsenical resistance operon repressor OS=Escherichia coli (strain K12)  
BAC0164|fecE|sp|P15031|FECE\_ECOLI Fe(3+) dicitrate transport ATP-binding protein FecE OS=Escherichia co  
BAC0136|dsbA|sp|P0AEG4|DSBA\_ECOLI Thiol:disulfide interchange protein DsbA OS=Escherichia coli (strain  
BAC0331|rcnB/yohN|sp|P64534|RCNB\_ECOLI Nickel/cobalt homeostasis protein RcnB OS=Escherichia coli (st  
BAC0086|corA|sp|P0ABI4|CORA\_ECOLI Magnesium transport protein CorA OS=Escherichia coli (strain K12)  
BAC0452|yqjH|sp|Q46871|YQJH\_ECOLI NADPH-dependent ferric-chelate reductase OS=Escherichia coli (stra  
BAC0692|merT|tr|Q79BG6|Q79BG6\_PSEST MerT OS=Pseudomonas stutzeri GN=merT PE=4 SV=1  
BAC0076|comR/ycfQ|sp|P75952|COMR\_ECOLI HTH-type transcriptional repressor ComR OS=Escherichia coli  
BAC0347|silR|sp|Q9ZHD3|SILR\_SALTM Probable transcriptional regulatory protein SilR OS=Salmonella typhi

BAC0578|arsB|tr|O50594|O50594\_ACIMU ArsB OS=Acidiphilium multivorum GN=arsB PE=4 SV=1  
BAC0566|actS|tr|Q52912|Q52912\_9RHIZ Histidine protein kinase OS=Sinorhizobium medicae GN=actS PE=4 SV=1  
BAC0693|merT|tr|Q79F00|Q79F00\_9PSED Mercuric transport protein OS=Pseudomonas sp. K-62 GN=merT PE=4 SV=1  
BAC0346|silP|sp|Q9ZHC7|SILP\_SALTM Silver exporting P-type ATPase OS=Salmonella typhimurium GN=silP PE=4 SV=1  
BAC0665|merD|tr|O66022|O66022\_PSEST Mercury operon coregulator protein OS=Pseudomonas stutzeri GN=merD PE=4 SV=1  
BAC0233|merT|sp|P94185|MERT\_ALCSP Mercuric transport protein OS=Alcaligenes sp. GN=merT PE=3 SV=1  
BAC0582|arsC|sp|P08692|ARSC1\_ECOLX Arsenate reductase OS=Escherichia coli GN=arsC PE=1 SV=1  
BAC0445|ygiW|sp|P0ADU5|YGIW\_ECOLI Protein YgiW OS=Escherichia coli (strain K12) GN=ygiW PE=1 SV=1  
BAC0694|merT-P|tr|H6WCN3|H6WCN3\_9FLAO MerT-P OS=Tenacibaculum discolor GN=merT-P PE=4 SV=1  
BAC0690|merT|tr|Q934S7|Q934S7\_THIFE Mercuric ion transport protein OS=Thiobacillus ferrooxidans GN=merT PE=4 SV=1  
BAC0465|znuC|yebM|sp|P0A9X1|ZNUC\_ECOLI Zinc import ATP-binding protein ZnuC OS=Escherichia coli (strain K12) GN=znuC PE=4 SV=1  
BAC0637|copS|tr|C6FFR5|C6FFR5\_PSEFL CopS OS=Pseudomonas fluorescens GN=copS PE=4 SV=1  
BAC0675|merP|tr|O07301|O07301\_9PSED Mercuric transport protein periplasmic component OS=Pseudomonas fluorescens GN=merP PE=4 SV=1  
BAC0134|dpr|dps|sp|P0CB53|DPS\_STRSU DNA protection during starvation protein OS=Streptococcus suis GN=dpr PE=4 SV=1  
BAC0100|ctpG|sp|P63689|CTPG\_MYCTU Probable cation-transporting ATPase G OS=Mycobacterium tuberculosis GN=ctpG PE=4 SV=1  
BAC0385|tehB|sp|P25397|TEHB\_ECOLI Tellurite methyltransferase OS=Escherichia coli (strain K12) GN=tehB PE=4 SV=1  
BAC0468|zraS|hydG|sp|P14377|ZRAS\_ECOLI Sensor protein ZraS OS=Escherichia coli (strain K12) GN=zraS PE=4 SV=1  
BAC0012|actP|sp|Q9X5X3|ATCU\_SINMW Copper-transporting P-type ATPase OS=Sinorhizobium medicae (strain K12) GN=actP PE=4 SV=1  
BAC0651|merA|sp|P0A0E5|MERA\_STAAU Mercuric reductase OS=Staphylococcus aureus GN=merA PE=3 SV=1  
BAC0253|mntR|sp|P0A9F1|MNTR\_ECOLI Transcriptional regulator MntR OS=Escherichia coli (strain K12) GN=mntR PE=4 SV=1  
BAC0101|ctpV|sp|P77894|CTPV\_MYCTU Probable copper-exporting P-type ATPase V OS=Mycobacterium tuberculosis GN=ctpV PE=4 SV=1  
BAC0332|rcnR|yohL|sp|P64530|RCNR\_ECOLI Transcriptional repressor RcnR OS=Escherichia coli (strain K12) GN=rcnR PE=4 SV=1  
BAC0111|cusR|ylcA|sp|P0ACZ8|CUSR\_ECOLI Transcriptional regulatory protein CusR OS=Escherichia coli (strain K12) GN=cusR PE=4 SV=1  
BAC0628|copB|tr|F4ZBX4|F4ZBX4\_XANCI CopB OS=Xanthomonas citri subsp. citri GN=copB PE=4 SV=1  
BAC0110|cusF|cusX|sp|P77214|CUSF\_ECOLI Cation efflux system protein CusF OS=Escherichia coli (strain K12) GN=cusF PE=4 SV=1  
BAC0433|ybtQ|tr|Q9Z375|Q9Z375\_YERPE Inner membrane ABC-transporter YbtQ OS=Yersinia pestis GN=ybtQ PE=4 SV=1  
BAC0571|arsA|sp|O50593|ARSA\_ACIMA Arsenical pump-driving ATPase OS=Acidiphilium multivorum (strain K12) GN=arsA PE=4 SV=1  
BAC0079|copB|sp|P05425|COPB\_ENTHA Copper-exporting P-type ATPase B OS=Enterococcus hirae (strain ATCC 29542) GN=copB PE=4 SV=1  
BAC0588|arsR|tr|P74986|P74986\_YEREN Arsenite inducible repressor OS=Yersinia enterocolitica GN=arsR PE=4 SV=1  
BAC0293|ruvB|tr|B5L348|B5L348\_9PSED Malic enzyme family protein (Fragment) OS=Pseudomonas corrugata GN=ruvB PE=4 SV=1  
BAC0639|copC|tr|C6FFR6|C6FFR6\_PSEFL CopC OS=Pseudomonas fluorescens GN=copC PE=4 SV=1  
BAC0331|rcnB|yohN|sp|P64534|RCNB\_ECOLI Nickel/cobalt homeostasis protein RcnB OS=Escherichia coli (strain K12) GN=rcnB PE=4 SV=1  
BAC0611|modC|sp|P09833|MODC\_ECOLI Molybdenum import ATP-binding protein ModC OS=Escherichia coli (strain K12) GN=modC PE=4 SV=1  
BAC0030|arsA|sp|P52145|ARSA2\_ECOLX Arsenical pump-driving ATPase OS=Escherichia coli GN=arsA PE=4 SV=1  
BAC0388|terC|sp|P18780|TERC\_ALCSP Tellurium resistance protein TerC OS=Alcaligenes sp. GN=terC PE=3 SV=1  
BAC0441|yfeC|sp|Q56954|YFEC\_YERPE Chelated iron transport system membrane protein YfeC OS=Yersinia enterocolitica GN=yfeC PE=4 SV=1  
BAC0389|terD|sp|P18781|TERD\_ALCSP Tellurium resistance protein TerD OS=Alcaligenes sp. GN=terD PE=3 SV=1  
BAC0285|nreB|tr|F0KND8|F0KND8\_ACICP NrsD, nreB nickel permease involved in nickel and cobalt tolerance OS=Escherichia coli (strain K12) GN=nreB PE=4 SV=1  
BAC0251|mntH|yfeP|sp|P0A769|MNTH\_ECOLI Divalent metal cation transporter MntH OS=Escherichia coli (strain K12) GN=mntH PE=4 SV=1  
BAC0119|czcA|sp|P13511|CZCA\_RALME Cobalt-zinc-cadmium resistance protein CzcA OS=Ralstonia metallum GN=czcA PE=4 SV=1  
BAC0652|merA|tr|O66017|O66017\_PSEST MerA OS=Pseudomonas stutzeri GN=merA PE=4 SV=1  
BAC0040|baeS|sp|P30847|BAES\_ECOLI Signal transduction histidine-protein kinase BaeS OS=Escherichia coli (strain K12) GN=baeS PE=4 SV=1  
BAC0346|silP|sp|Q9ZHC7|SILP\_SALTM Silver exporting P-type ATPase OS=Salmonella typhimurium GN=silP PE=4 SV=1  
BAC0109|cusC|ylcB|sp|P77211|CUSC\_ECOLI Cation efflux system protein CusC OS=Escherichia coli (strain K12) GN=cusC PE=4 SV=1  
BAC0463|znuA|yebL|sp|P39172|ZNUA\_ECOLI High-affinity zinc uptake system protein ZnuA OS=Escherichia coli (strain K12) GN=znuA PE=4 SV=1  
BAC0181|glpF|sp|P0AER0|GLPF\_ECOLI Glycerol uptake facilitator protein OS=Escherichia coli (strain K12) GN=glpF PE=4 SV=1

BAC0467|zraR|hydH|sp|P14375|ZRAR\_ECOLI Transcriptional regulatory protein ZraR OS=Escherichia coli (strain K12) GN=zraR PE=3 SV=1

BAC0585|arsC|sp|P74984|ARSC\_YEREN Arsenate reductase OS=Yersinia enterocolitica GN=arsC PE=3 SV=1

BAC0459|zitB|ybgR|sp|P75757|ZITB\_ECOLI Zinc transporter ZitB OS=Escherichia coli (strain K12) GN=zitB PE=3 SV=1

BAC0059|cadX|tr|A7LHQ4|A7LHQ4\_STRSL CadX OS=Streptococcus salivarius GN=cadX PE=4 SV=1

BAC0273|nikD|sp|P33593|NIKD\_ECOLI Nickel import ATP-binding protein NikD OS=Escherichia coli (strain K12) GN=nikD PE=3 SV=1

BAC0666|merD|tr|O66018|O66018\_PSEST MerD OS=Pseudomonas stutzeri GN=merD PE=4 SV=1

BAC0549|nccA|sp|Q44586|NCCA\_ALCXX Nickel-cobalt-cadmium resistance protein NccA OS=Alcaligenes faecalis GN=nccA PE=3 SV=1

BAC0022|aioR|aoxR|tr|Q2VGB1|Q2VGB1\_RHIRD Putative transcriptional regulator OS=Rhizobium radiobacter GN=aioR PE=3 SV=1

BAC0563|acrD|tr|Q8ZN77|Q8ZN77\_SALTY RND family aminoglycoside/multidrug efflux pump OS=Salmonella enterica GN=acrD PE=3 SV=1

BAC0027|chrB|tr|A4UQR5|A4UQR5\_9RHIZ ChrB OS=Ochrobactrum tritici GN=chrB PE=4 SV=1

BAC0352|sitD|tr|Q9XCR9|Q9XCR9\_SALTM SitD OS=Salmonella typhimurium GN=sitD PE=3 SV=1

BAC0168|fptA|sp|P42512|FPTA\_PSEAE Fe(3+)-pyochelin receptor OS=Pseudomonas aeruginosa (strain ATCC 27819) GN=fptA PE=3 SV=1

BAC0026|chrA|tr|A4UQR4|A4UQR4\_9RHIZ Chromate transporter OS=Ochrobactrum tritici GN=chrA PE=4 SV=1

BAC0355|ruvB|sp|Q51426|RUVB\_PSEAE Holliday junction ATP-dependent DNA helicase RuvB OS=Pseudomonas aeruginosa GN=ruvB PE=3 SV=1

BAC0687|merR|tr|Q79BG7|Q79BG7\_PSEST MerR OS=Pseudomonas stutzeri GN=merR PE=4 SV=1

BAC0368|sodA|sp|P00448|SODM\_ECOLI Superoxide dismutase [Mn] OS=Escherichia coli (strain K12) GN=sodA PE=3 SV=1

BAC0279|nirD|tr|Q6RUG0|Q6RUG0\_KLEOX NirD OS=Klebsiella oxytoca GN=nirD PE=4 SV=1

BAC0670|merE|tr|Q52104|Q52104\_9ZZZZ Uncharacterized protein OS=Plasmid pDU1358 PE=4 SV=1

BAC0344|silE|sp|Q9Z4N3|SILE\_SALTM Silver-binding protein SilE OS=Salmonella typhimurium GN=silE PE=3 SV=1

BAC0371|soxS|sp|P0A9E2|SOXS\_ECOLI Regulatory protein SoxS OS=Escherichia coli (strain K12) GN=soxS PE=3 SV=1

BAC0049|bhsA|ycfR|comC|sp|P0AB40|BHSA\_ECOLI Multiple stress resistance protein BhsA OS=Escherichia coli (strain K12) GN=bhsA PE=3 SV=1

BAC0665|merD|tr|O66022|O66022\_PSEST Mercury operon coregulator protein OS=Pseudomonas stutzeri GN=merD PE=4 SV=1

BAC0101|ctpV|sp|P77894|CTPV\_MYCTU Probable copper-exporting P-type ATPase V OS=Mycobacterium tuberculosis GN=ctpV PE=3 SV=1

BAC0107|cusA|ybdE|sp|P38054|CUSA\_ECOLI Cation efflux system protein CusA OS=Escherichia coli (strain K12) GN=cusA PE=3 SV=1

BAC0298|pbrA|tr|Q58AJ6|Q58AJ6\_RALME P-type ATPase involved in Pb(II) resistance PbrA OS=Ralstonia metallum GN=pbrA PE=3 SV=1

BAC0114|cutC|sp|P67826|CUTC\_ECOLI Copper homeostasis protein CutC OS=Escherichia coli (strain K12) GN=cutC PE=3 SV=1

BAC0086|corA|sp|P0ABI4|CORA\_ECOLI Magnesium transport protein CorA OS=Escherichia coli (strain K12) GN=corA PE=3 SV=1

BAC0102|cueA|tr|Q8KWW2|Q8KWW2\_PSEPU Copper transporter OS=Pseudomonas putida GN=cueA PE=3 SV=1

BAC0137|dsbB|sp|P0A6M2|DSBB\_ECOLI Disulfide bond formation protein B OS=Escherichia coli (strain K12) GN=dsbB PE=3 SV=1

BAC0110|cusF|cusX|sp|P77214|CUSF\_ECOLI Cation efflux system protein CusF OS=Escherichia coli (strain K12) GN=cusF PE=3 SV=1

BAC0686|merR|sp|P13111|MERR\_SERMA Mercuric resistance operon regulatory protein OS=Serratia marcescens GN=merR PE=3 SV=1

BAC0452|yqjH|sp|Q46871|YQJH\_ECOLI NADPH-dependent ferric-chelate reductase OS=Escherichia coli (strain K12) GN=yqjH PE=3 SV=1

BAC0573|arsB|sp|P45946|ARSB\_BACSU Arsenite resistance protein ArsB OS=Bacillus subtilis (strain 168) GN=arsB PE=3 SV=1

BAC0672|merE|tr|Q79BE4|Q79BE4\_PSEST Urf1 OS=Pseudomonas stutzeri GN=merE PE=4 SV=1

BAC0651|merA|sp|P0A0E5|MERA\_STAAU Mercuric reductase OS=Staphylococcus aureus GN=merA PE=3 SV=1

BAC0240|mexI|tr|Q9HWH4|Q9HWH4\_PSEAE Probable Resistance-Nodulation-Cell Division (RND) efflux transporter OS=Escherichia coli (strain K12) GN=mexI PE=3 SV=1

BAC0387|terB|sp|P18779|TERB\_ALCSP Tellurium resistance protein TerB OS=Alcaligenes sp. GN=terB PE=4 SV=1

BAC0565|actR|sp|A6UEL7|ACTR\_SINMW Acid tolerance regulatory protein ActR OS=Sinorhizobium medicae GN=actR PE=3 SV=1

BAC0657|merB|tr|O07303|O07303\_9PSED Alkylmercury lyase OS=Pseudomonas sp. K-62 GN=merB PE=3 SV=1

BAC0447|yjaA|sp|P09162|YJAA\_ECOLI Uncharacterized protein YjaA OS=Escherichia coli (strain K12) GN=yjaA PE=3 SV=1

BAC0108|cusB|sp|P77239|CUSB\_ECOLI Cation efflux system protein CusB OS=Escherichia coli (strain K12) GN=cusB PE=3 SV=1

BAC0637|copS|tr|C6FFR5|C6FFR5\_PSEFL CopS OS=Pseudomonas fluorescens GN=copS PE=4 SV=1

BAC0384|tehA|sp|P25396|TEHA\_ECOLI Tellurite resistance protein TehA OS=Escherichia coli (strain K12) GN=tehA PE=3 SV=1

BAC0299|pbrB|pbrC|tr|Q58AJ7|Q58AJ7\_RALME Lipoprotein signal peptidase OS=Ralstonia metallidurans GN=pbrB PE=3 SV=1

BAC0668|merD|tr|Q5NUV1|Q5NUV1\_RALME MerD from Tn4378, regulatory protein involved in Hg(II) resistance OS=Ralstonia metallidurans GN=merD PE=3 SV=1

BAC0629|copB|sp|O30085|COPB\_ARCFU Copper-exporting P-type ATPase B OS=Archaeoglobus fulgidus GN=copB PE=3 SV=1

BAC0577|arsB|sp|P74985|ARSB\_YEREN Arsenical pump membrane protein OS=Yersinia enterocolitica GN=arsB PE=1 SV=1  
BAC0644|corD|sp|Q56017|APAG\_SALTY Protein ApaG OS=Salmonella typhimurium (strain LT2 / SGSC1412) GN=corD PE=1 SV=1  
BAC0169|fpvA|sp|P48632|FPVA\_PSEAE Ferripyoverdine receptor OS=Pseudomonas aeruginosa (strain ATCC 27962) GN=fpvA PE=1 SV=1  
BAC0540|nfsA|sp|P17117|NFSA\_ECOLI Oxygen-insensitive NADPH nitroreductase OS=Escherichia coli (strain K12) GN=nfsA PE=1 SV=1  
BAC0383|tcrB|tr|Q8VPE6|Q8VPE6\_ENTFC TcrB OS=Enterococcus faecium GN=tcrB PE=3 SV=1  
BAC0035|arsM|tr|Q6N3Y0|Q6N3Y0\_RHOPA UbiE/COQ5 methyltransferase OS=Rhodopseudomonas palustris GN=arsM PE=1 SV=1  
BAC0445|ygiW|sp|P0ADU5|YGIW\_ECOLI Protein YgiW OS=Escherichia coli (strain K12) GN=ygiW PE=1 SV=1  
BAC0334|robA|sp|P0ACI0|ROB\_ECOLI Right origin-binding protein OS=Escherichia coli (strain K12) GN=robA PE=1 SV=1  
BAC0077|copA|sp|P12374|COPA\_PSEUB Copper resistance protein A OS=Pseudomonas syringae pv. tomato GN=copA PE=1 SV=1  
BAC0163|fecD|sp|P15029|FECD\_ECOLI Fe(3+) dicitrate transport system permease protein FecD OS=Escherichia coli (strain K12) GN=fecD PE=1 SV=1  
BAC0130|czrA|tr|Q9RLI8|Q9RLI8\_PSEAI CzrA protein OS=Pseudomonas aeruginosa GN=czrA PE=4 SV=1  
BAC0270|nikA|sp|P33590|NIKA\_ECOLI Nickel-binding periplasmic protein OS=Escherichia coli (strain K12) GN=nikA PE=1 SV=1  
BAC0078|copA|sp|O32220|COPA\_BACSU Copper-exporting P-type ATPase A OS=Bacillus subtilis (strain 168) GN=copA PE=1 SV=1  
BAC0699|ncrB|tr|Q1KLR1|Q1KLR1\_SERMA NcrB OS=Serratia marcescens GN=ncrB PE=4 SV=1  
BAC0012|actP|sp|Q9X5X3|ATCU\_SINMW Copper-transporting P-type ATPase OS=Sinorhizobium medicae (strain ATCC 35061) GN=actP PE=1 SV=1  
BAC0570|actP|tr|D5AU53|D5AU53\_RHO�B Cation/acetate symporter ActP-1 OS=Rhodobacter capsulatus (strain ATCC 29418) GN=actP PE=1 SV=1  
BAC0134|dpr/dps|sp|P0CB53|DPS\_STRSU DNA protection during starvation protein OS=Streptococcus suis GN=dpr/dps PE=1 SV=1  
BAC0457|zinT|yodA|sp|P76344|ZINT\_ECOLI Metal-binding protein ZinT OS=Escherichia coli (strain K12) GN=zinT PE=1 SV=1  
BAC0349|sitA|tr|Q9XCS2|Q9XCS2\_SALTI Iron transport protein, periplasmic-binding protein OS=Salmonella typhimurium GN=sitA PE=1 SV=1  
BAC0684|merR2|tr|Q7DKL2|Q7DKL2\_9PSED MerR2 OS=Pseudomonas sp. K-62 GN=merR2 PE=4 SV=1  
BAC0692|merT|tr|Q79BG6|Q79BG6\_PSEST MerT OS=Pseudomonas stutzeri GN=merT PE=4 SV=1  
BAC0631|copC|tr|F4ZBX9|F4ZBX9\_XANCI CopC OS=Xanthomonas citri subsp. citri GN=copC PE=4 SV=1  
BAC0099|ctpD|sp|A0R3A7|CTPD\_MYCS2 Probable cobalt/nickel-exporting P-type ATPase OS=Mycobacterium tuberculosis H37Rv GN=ctpD PE=1 SV=1  
BAC0575|arsB|sp|Q01255|ARSB\_STAXY Arsenical pump membrane protein OS=Staphylococcus xylosus GN=arsB PE=1 SV=1  
BAC0170|frnE|tr|Q9RWK7|Q9RWK7\_DEIRA FrnE protein OS=Deinococcus radiodurans (strain ATCC 13939) GN=frnE PE=1 SV=1  
BAC0307|pcoE|sp|Q47459|PCOE\_ECOLX Probable copper-binding protein PcoE OS=Escherichia coli GN=pcoE PE=1 SV=1  
BAC0392|terZ|sp|Q52353|TERZ\_SERMA Tellurium resistance protein TerZ OS=Serratia marcescens GN=terZ PE=1 SV=1  
BAC0253|mntR|sp|P0A9F1|MNTR\_ECOLI Transcriptional regulator MntR OS=Escherichia coli (strain K12) GN=mntR PE=1 SV=1  
BAC0266|ncrY|tr|Q06VT0|Q06VT0\_9BACT NcrY OS=Leptospirillum ferriphilum GN=ncrY PE=4 SV=1  
BAC0433|ybtQ|tr|Q9Z375|Q9Z375\_YERPE Inner membrane ABC-transporter YbtQ OS=Yersinia pestis GN=ybtQ PE=1 SV=1  
BAC0272|nikC|sp|P0AFA9|NIKC\_ECOLI Nickel transport system permease protein NikC OS=Escherichia coli (strain K12) GN=nikC PE=1 SV=1  
BAC0439|yfeA|sp|Q56952|YFEA\_YERPE Periplasmic chelated iron-binding protein YfeA OS=Yersinia pestis GN=yfeA PE=1 SV=1  
BAC0076|comR|ycfQ|sp|P75952|COMR\_ECOLI HTH-type transcriptional repressor ComR OS=Escherichia coli (strain K12) GN=comR PE=1 SV=1  
BAC0120|czcB|sp|P13510|CZCB\_RALME Cobalt-zinc-cadmium resistance protein CzcB OS=Ralstonia metallidurans GN=czcB PE=1 SV=1  
BAC0596|baeR|tr|D0ZNE3|D0ZNE3\_SALT1 DNA-binding transcriptional regulator BaeR OS=Salmonella typhimurium GN=baeR PE=1 SV=1  
BAC0278|nirC|tr|Q6RUG1|Q6RUG1\_KLEOX NirC OS=Klebsiella oxytoca GN=nirC PE=4 SV=1  
BAC0673|merE|sp|P06690|MERE\_PSEAI Uncharacterized mercuric resistance protein MerE OS=Pseudomonas aeruginosa GN=merE PE=1 SV=1  
BAC0582|arsC|sp|P08692|ARSC1\_ECOLX Arsenate reductase OS=Escherichia coli GN=arsC PE=1 SV=1  
BAC0451|yodD|sp|P64519|YODD\_ECOLI Uncharacterized protein YodD OS=Escherichia coli (strain K12) GN=yodD PE=1 SV=1  
BAC0656|merB3|tr|Q7DHE7|Q7DHE7\_BACCE Organomercurial lyase enzyme OS=Bacillus cereus GN=merB3 PE=1 SV=1  
BAC0263|ncrA|tr|Q06VT3|Q06VT3\_9BACT NcrA OS=Leptospirillum ferriphilum GN=ncrA PE=4 SV=1  
BAC0594|arsR|sp|P37309|ARSR\_ECOLI Arsenical resistance operon repressor OS=Escherichia coli (strain K12) GN=arsR PE=1 SV=1  
BAC0164|fecE|sp|P15031|FECE\_ECOLI Fe(3+) dicitrate transport ATP-binding protein FecE OS=Escherichia coli (strain K12) GN=fecE PE=1 SV=1  
BAC0591|arsR|sp|P52144|ARSR2\_ECOLX Arsenical resistance operon repressor OS=Escherichia coli GN=arsR PE=1 SV=1  
BAC0356|recG|tr|Q9HTL3|Q9HTL3\_PSEAE ATP-dependent DNA helicase RecG OS=Pseudomonas aeruginosa GN=recG PE=1 SV=1  
BAC0228|merF|tr|Q2QCN0|Q2QCN0\_9PSED MerF OS=Pseudomonas sp. CT14 GN=merF PE=4 SV=1

BAC0432|ybtP|tr|Q9R7V3|Q9R7V3\_YERPE Lipoprotein inner membrane ABC-transporter OS=Yersinia pestis GN=ybtP PE=4 SV=1  
 BAC0689|merR|tr|Q934S8|Q934S8\_THIFE Mer operon regulatory protein OS=Thiobacillus ferrooxidans GN=merR PE=4 SV=1  
 BAC0391|terW|sp|P75010|TERW\_SERMA Tellurium resistance protein TerW OS=Serratia marcescens GN=terW PE=4 SV=1  
 BAC0683|merR1|tr|O07300|O07300\_9PSED Mercuric resistance operon regulatory protein OS=Pseudomonas sp. K-62 GN=merR1 PE=4 SV=1  
 BAC0031|arsB|sp|P08691|ARSB1\_ECOLX Arsenical pump membrane protein OS=Escherichia coli GN=arsB PE=4 SV=1  
 BAC0645|mdtA|tr|D0ZND8|D0ZND8\_SALT1 Multidrug resistance protein MdtA OS=Salmonella typhimurium GN=mdtA PE=4 SV=1  
 BAC0084|copY|tr|Y|sp|Q47839|COPY\_ENTHA Transcriptional repressor CopY OS=Enterococcus hirae (strain ATCC 29542) GN=copY PE=4 SV=1  
 BAC0308|pcoR|sp|Q47456|PCOR\_ECOLX Transcriptional regulatory protein PcoR OS=Escherichia coli GN=pcoR PE=4 SV=1  
 BAC0695|merT|sp|P13112|MERT\_SERMA Mercuric transport protein OS=Serratia marcescens GN=merT PE=4 SV=1  
 BAC0707|sodB|sp|P0AGD3|SODF\_ECOLI Superoxide dismutase [Fe] OS=Escherichia coli (strain K12) GN=sodB PE=4 SV=1  
 BAC0020|aioA|aoxB|sp|Q8GGJ6|AIOA\_HERAR Arsenite oxidase subunit AioA OS=Herminiimonas arsenicoxydans GN=aioA PE=4 SV=1  
 BAC0171|furA|sp|P0A582|FURA\_MYCTU Transcriptional regulator FurA OS=Mycobacterium tuberculosis GN=furA PE=4 SV=1  
 BAC0648|merA|sp|P08662|MERA\_SERMA Mercuric reductase (Fragments) OS=Serratia marcescens GN=merA PE=4 SV=1  
 BAC0182|golS|tr|Q8ZRG6|Q8ZRG6\_SALTY Putative transcriptional regulator OS=Salmonella typhimurium GN=golS PE=4 SV=1  
 BAC0058|cadR|tr|Q93TP7|Q93TP7\_PSEPU CadR OS=Pseudomonas putida GN=cadR PE=4 SV=1  
 BAC0649|merA|tr|E3VST6|E3VST6\_9FLAO MerA OS=Tenacibaculum discolor GN=merA PE=3 SV=1  
 BAC0317|pstC|sp|P0AGH8|PSTC\_ECOLI Phosphate transport system permease protein PstC OS=Escherichia coli (strain K12) GN=pstC PE=4 SV=1  
 BAC0597|baeS|tr|D0ZNE2|D0ZNE2\_SALT1 Signal transduction histidine-protein kinase BaeS OS=Salmonella typhimurium GN=baeS PE=4 SV=1  
 BAC0698|ncrA|tr|Q1KLR2|Q1KLR2\_SERMA NcrA OS=Serratia marcescens GN=ncrA PE=4 SV=1  
 BAC0032|arsC|sp|P0A006|ARSC\_STAAU Protein ArsC OS=Staphylococcus aureus GN=arsC PE=1 SV=1  
 BAC0676|merP|tr|Q7DHE4|Q7DHE4\_BACCE Mercury-binding protein OS=Bacillus cereus GN=merP PE=4 SV=1  
 BAC0440|yfeB|sp|Q56953|YFEB\_YERPE Chelated iron transport system membrane protein YfeB OS=Yersinia enterocolitica GN=yfeB PE=4 SV=1  
 BAC0566|actS|tr|Q52912|Q52912\_9RHIZ Histidine protein kinase OS=Sinorhizobium medicae GN=actS PE=4 SV=1  
 BAC0079|copB|sp|P05425|COPB\_ENTHA Copper-exporting P-type ATPase B OS=Enterococcus hirae (strain ATCC 29542) GN=copB PE=4 SV=1  
 BAC0231|merP|sp|P13113|MERP\_SERMA Mercuric transport protein periplasmic component OS=Serratia marcescens GN=merP PE=4 SV=1  
 BAC0610|modB|sp|P0AF01|MODB\_ECOLI Molybdenum transport system permease protein ModB OS=Escherichia coli (strain K12) GN=modB PE=4 SV=1  
 BAC0541|yieF|sp|P0AGE6|YIEF\_ECOLI Uncharacterized protein YieF OS=Escherichia coli (strain K12) GN=yieF PE=4 SV=1  
 BAC0113|cutA|sp|P69488|CUTA\_ECOLI Divalent-cation tolerance protein CutA OS=Escherichia coli (strain K12) GN=cutA PE=4 SV=1  
 BAC0229|merG|tr|O07302|O07302\_9PSED Mercuric resistance protein OS=Pseudomonas sp. K-62 GN=merG PE=4 SV=1  
 BAC0489|ALU1-P|tr|O52119|O52119\_ARTVI Aluminum resistance protein (Fragment) OS=Arthrobacter viscosus GN=ALU1-P PE=4 SV=1  
 BAC0233|merT|sp|P94185|MERT\_ALCSP Mercuric transport protein OS=Alcaligenes sp. GN=merT PE=3 SV=1  
 BAC0303|pcoA|sp|Q47452|PCOA\_ECOLX Copper resistance protein A OS=Escherichia coli GN=pcoA PE=3 SV=1  
 BAC0166|fetB|ybbM|sp|P77307|YBBM\_ECOLI UPF0014 inner membrane protein YbbM OS=Escherichia coli (strain K12) GN=fetB PE=4 SV=1  
 BAC0203|cnrA|sp|P37972|CNRA\_RALME Nickel and cobalt resistance protein CnrA OS=Ralstonia metallidurans GN=cnrA PE=4 SV=1  
 BAC0442|yfeD|sp|Q56955|YFED\_YERPE Chelated iron transport system membrane protein YfeD OS=Yersinia enterocolitica GN=yfeD PE=4 SV=1  
 BAC0117|cutO|tr|D5AV58|D5AV58\_RHO�B Multicopper oxidase family protein OS=Rhodobacter capsulatus GN=cutO PE=4 SV=1  
 BAC0661|merB2|tr|Q7DJN2|Q7DJN2\_BACME MerB2 OS=Bacillus megaterium GN=merB2 PE=4 SV=1  
 BAC0088|corC|sp|P0A2L3|CORC\_SALTY Magnesium and cobalt efflux protein CorC OS=Salmonella typhimurium GN=corC PE=4 SV=1  
 BAC0469|zupT|ygiE|sp|P0A8H3|ZUPT\_ECOLI Zinc transporter ZupT OS=Escherichia coli (strain K12) GN=zupT PE=4 SV=1  
 BAC0138|dsbC|sp|P0AEG6|DSBC\_ECOLI Thiol:disulfide interchange protein DsbC OS=Escherichia coli (strain K12) GN=dsbC PE=4 SV=1  
 BAC0275|nikR|sp|P0A6Z6|NIKR\_ECOLI Nickel-responsive regulator OS=Escherichia coli (strain K12) GN=nikR PE=4 SV=1  
 BAC0116|cutF|nlpE|sp|P40710|NLPE\_ECOLI Lipoprotein NlpE OS=Escherichia coli (strain K12) GN=nlpE PE=4 SV=1  
 BAC0482|dmeF|tr|Q1MJL2|Q1MJL2\_RHIL3 Putative cation efflux system protein OS=Rhizobium leguminosarum GN=dmeF PE=4 SV=1  
 BAC0199|klaB|telA|kilB|sp|Q52328|KLAB\_ECOLX Protein KlaB OS=Escherichia coli GN=klaB PE=3 SV=1  
 BAC0446|yhcn|sp|P64614|YHCN\_ECOLI Uncharacterized protein Yhcn OS=Escherichia coli (strain K12) GN=yhcn PE=4 SV=1  
 BAC0316|pstB|sp|P0AAH0|PSTB\_ECOLI Phosphate import ATP-binding protein PstB OS=Escherichia coli (strain K12) GN=pstB PE=4 SV=1

BAC0638|copR|tr|C6FFR4|C6FFR4\_PSEFL CopR OS=Pseudomonas fluorescens GN=copR PE=4 SV=1  
BAC0548|chrA1|sp|P17551|CHRA1\_RALME Chromate transport protein OS=Ralstonia metallidurans (strain CH  
BAC0048|bfrA|sp|P63697|BFR\_MYCTU Bacterioferritin OS=Mycobacterium tuberculosis GN=bfr PE=1 SV=1  
BAC0627|copB|tr|F4ZD00|F4ZD00\_9XANT Copper resistance protein B OS=Xanthomonas alfalfae subsp. citru  
BAC0267|nczA|tr|B8GZE9|B8GZE9\_CAUCN Cobalt-zinc-cadmium resistance protein czcA OS=Caulobacter cro  
BAC0642|mgtA|sp|P36640|ATMA\_SALTY Magnesium-transporting ATPase, P-type 1 OS=Salmonella typhimu  
BAC0572|arsA|sp|P08690|ARSA1\_ECOLX Arsenical pump-driving ATPase OS=Escherichia coli GN=arsA PE=  
BAC0063|chrA|sp|P14285|CHRA\_PSEAI Chromate transport protein OS=Pseudomonas aeruginosa GN=chrA PE=  
BAC0678|merP|tr|O66016|O66016\_PSEST MerP OS=Pseudomonas stutzeri GN=merP PE=4 SV=1  
BAC0133|dnaK|sp|P0A5B9|DNAK\_MYCTU Chaperone protein DnaK OS=Mycobacterium tuberculosis GN=dn  
BAC0694|merT-P|tr|H6WCN3|H6WCN3\_9FLAO MerT-P OS=Tenacibaculum discolor GN=merT-P PE=4 SV=  
BAC0098|ctpC|sp|P0A502|CTPC\_MYCTU Probable manganese/zinc-exporting P-type ATPase OS=Mycobacteri  
BAC0269|nia|tr|Q92Z60|Q92Z60\_RHIME Cation transport P-type ATPase OS=Rhizobium meliloti (strain 1021)  
BAC0125|czcR|sp|Q44006|CZCR\_RALME Transcriptional activator protein CzcR OS=Ralstonia metallidurans (  
BAC0608|modE|sp|P0A9G8|MODE\_ECOLI Transcriptional regulator ModE OS=Escherichia coli (strain K12) G  
BAC0028|chrC|tr|A4UQR3|A4UQR3\_9RHIZ Superoxide dismutase OS=Ochrobactrum tritici GN=chrC PE=3 S  
BAC0254|mrdH|tr|Q88IN1|Q88IN1\_PSEPK Membrane protein, putative OS=Pseudomonas putida (strain KT244  
BAC0112|cusS|sp|P77485|CUSS\_ECOLI Sensor kinase CusS OS=Escherichia coli (strain K12) GN=cusS PE=1  
BAC0619|copA|tr|Q7WYH1|Q7WYH1\_PSEPU CopA OS=Pseudomonas putida GN=copA PE=4 SV=1  
BAC0003|acn|tr|O53166|O53166\_MYCTU Aconitate hydratase OS=Mycobacterium tuberculosis H37Rv GN=R  
BAC0039|baeR|sp|P69228|BAER\_ECOLI Transcriptional regulatory protein BaeR OS=Escherichia coli (strain K  
BAC0357|recG|tr|B5L350|B5L350\_9PSED ATP-dependent DNA helicase (Fragment) OS=Pseudomonas corruga  
BAC0115|cutE|lnt|sp|P23930|LNT\_ECOLI Apolipoprotein N-acyltransferase OS=Escherichia coli (strain K12) G  
BAC0315|pstA|sp|P07654|PSTA\_ECOLI Phosphate transport system permease protein PstA OS=Escherichia coli  
BAC0697|merT|tr|Q7DHE5|Q7DHE5\_BACCE Mercury transport protein OS=Bacillus cereus GN=merT PE=4 S  
BAC0688|merR2|tr|Q79B70|Q79B70\_PSEST Organomercurial resistance regulatory protein OS=Pseudomonas st  
BAC0621|copA|tr|F4ZBX3|F4ZBX3\_XANCI CopA OS=Xanthomonas citri subsp. citri GN=copA PE=4 SV=1  
BAC0465|znuC/yebM|sp|P0A9X1|ZNUC\_ECOLI Zinc import ATP-binding protein ZnuC OS=Escherichia coli (  
BAC0650|merA|tr|O08449|O08449\_9PSED Mercuric reductase OS=Pseudomonas sp. K-62 GN=merA PE=4 SV  
BAC0333|ricR|tr|O07434|O07434\_MYCTU Regulated in copper repressor OS=Mycobacterium tuberculosis H37  
BAC0641|corA|sp|P0A2R8|CORA\_SALTY Magnesium transport protein CorA OS=Salmonella typhimurium (str  
BAC0274|nikE|sp|P33594|NIKE\_ECOLI Nickel import ATP-binding protein NikE OS=Escherichia coli (strain K  
BAC0302|pbrT|tr|Q5GR69|Q5GR69\_ALCXX Lead uptake protein PbrT OS=Alcaligenes xylosoxydans xylosoxy  
BAC0679|merP|tr|O66047|O66047\_PSEST Mercury transport protein OS=Pseudomonas stutzeri GN=merP PE=4  
BAC0647|mdtC|tr|D0ZNE0|D0ZNE0\_SALT1 Multidrug resistance protein MdtC OS=Salmonella typhimurium (  
BAC0341|silA|sp|Q9ZHC9|SILA\_SALTM Putative cation efflux system protein SilA OS=Salmonella typhimuriu  
BAC0464|znuB/yebI|sp|P39832|ZNUB\_ECOLI High-affinity zinc uptake system membrane protein ZnuB OS=Es  
BAC0034|arsH|tr|E8PS81|E8PS81\_YERPE Arsenic resistance protein ArsH OS=Yersinia pestis Java 9 GN=arsH  
BAC0583|arsC|sp|P52147|ARSC2\_ECOLX Arsenate reductase OS=Escherichia coli GN=arsC PE=3 SV=1  
BAC0103|cueO|sp|P36649|CUEO\_ECOLI Blue copper oxidase CueO OS=Escherichia coli (strain K12) GN=cue  
BAC0167|fieF/yiip|sp|P69380|FIEF\_ECOLI Ferrous-iron efflux pump FieF OS=Escherichia coli (strain K12) GN  
BAC0612|perO|tr|D5AQ60|D5AQ60\_RHO�B Divalent ion symporter OS=Rhodobacter capsulatus (strain ATCC  
BAC0309|pcoS|sp|Q47457|PCOS\_ECOLX Probable sensor protein PcoS OS=Escherichia coli GN=pcoS PE=3 S  
BAC0574|arsB|sp|P30329|ARSB\_STAAU Arsenical pump membrane protein OS=Staphylococcus aureus GN=ar  
BAC0358|oscA|tr|B6CM35|B6CM35\_9PSED Putative uncharacterized protein oscA OS=Pseudomonas corrugata  
BAC0271|nikB|sp|P33591|NIKB\_ECOLI Nickel transport system permease protein NikB OS=Escherichia coli (s

BAC0386|terA|sp|P18778|TERA\_ALCSP Tellurium resistance protein TerA OS=Alcaligenes sp. GN=terA PE=4  
BAC0276|nirA|tr|Q6RUG3|Q6RUG3\_KLEOX NirA OS=Klebsiella oxytoca GN=nirA PE=4 SV=1  
BAC0461|zntA|yhhO|sp|P37617|ATZN\_ECOLI Lead, cadmium, zinc and mercury-transporting ATPase OS=Escherichia coli (strain ATCC 8739) GN=zntA PE=4 SV=1  
BAC0087|mgtA|sp|P0ABB8|ATMA\_ECOLI Magnesium-transporting ATPase, P-type 1 OS=Escherichia coli (strain ATCC 8739) GN=mgtA PE=4 SV=1  
BAC0350|sitB|tr|Q9XCS1|Q9XCS1\_SALTM SitB OS=Salmonella typhimurium GN=sitB PE=3 SV=1  
BAC0136|dsbA|sp|P0AEG4|DSBA\_ECOLI Thiol:disulfide interchange protein DsbA OS=Escherichia coli (strain ATCC 8739) GN=dsbA PE=4 SV=1  
BAC0342|silB|sp|Q9ZHD0|SILB\_SALTM Putative membrane fusion protein SilB OS=Salmonella typhimurium GN=silB PE=4 SV=1  
BAC0122|czcD|sp|P13512|CZCD\_RALME Cobalt-zinc-cadmium resistance protein CzcD OS=Ralstonia metallum GN=czcD PE=4 SV=1  
BAC0131|cztB|tr|Q9RLI9|Q9RLI9\_PSEAI CztB protein OS=Pseudomonas aeruginosa GN=cztB PE=4 SV=1  
BAC0568|actP|sp|Q9X5V3|ATCU\_RHILV Copper-transporting P-type ATPase OS=Rhizobium leguminosarum GN=actP PE=4 SV=1  
BAC0264|ncrB|tr|Q06VT2|Q06VT2\_9BACT NcrB OS=Leptospirillum ferriphilum GN=ncrB PE=4 SV=1  
BAC0082|copL|tr|Q5YKV8|Q5YKV8\_9XANT CopL OS=Xanthomonas perforans GN=copL PE=4 SV=1  
BAC0306|pcoD|sp|Q47455|PCOD\_ECOLX Copper resistance protein D OS=Escherichia coli GN=pcoD PE=3 SV=1  
BAC0224|merA|sp|P16171|MERA\_BACCE Mercuric reductase OS=Bacillus cereus GN=merA PE=1 SV=1  
BAC0675|merP|tr|O07301|O07301\_9PSED Mercuric transport protein periplasmic component OS=Pseudomonas aeruginosa GN=merP PE=4 SV=1  
BAC0654|merB1|sp|P16172|MERB\_BACCE Alkylmercury lyase OS=Bacillus cereus GN=merB1 PE=3 SV=2  
BAC0183|golT|tr|Q8ZRG7|Q8ZRG7\_SALTY Putative cation transport ATPase OS=Salmonella typhimurium (strain LT2) GN=golT PE=4 SV=1  
BAC0385|tehB|sp|P25397|TEHB\_ECOLI Tellurite methyltransferase OS=Escherichia coli (strain K12) GN=tehB PE=4 SV=1  
BAC0330|rcnA|yohM|sp|P76425|RCNA\_ECOLI Nickel/cobalt efflux system RcnA OS=Escherichia coli (strain K12) GN=rcnA PE=4 SV=1  
BAC0100|ctpG|sp|P63689|CTPG\_MYCTU Probable cation-transporting ATPase G OS=Mycobacterium tuberculosis H37Rv GN=ctpG PE=4 SV=1  
BAC0312|pitA|sp|P0AFJ7|PITA\_ECOLI Low-affinity inorganic phosphate transporter 1 OS=Escherichia coli (strain ATCC 8739) GN=pitA PE=4 SV=1  
BAC0576|arsB|sp|P52146|ARSB2\_ECOLX Arsenical pump membrane protein OS=Escherichia coli GN=arsB PE=4 SV=1  
BAC0305|pcoC|sp|Q47454|PCOC\_ECOLX Copper resistance protein C OS=Escherichia coli GN=pcoC PE=1 SV=1  
BAC0111|cusR|ylcA|sp|P0ACZ8|CUSR\_ECOLI Transcriptional regulatory protein CusR OS=Escherichia coli (strain K12) GN=cusR PE=4 SV=1  
BAC0343|silC|sp|Q9ZHD2|SILC\_SALTM Probable outer membrane lipoprotein SilC OS=Salmonella typhimurium GN=silC PE=4 SV=1  
BAC0265|ncrC|tr|D5CKG5|D5CKG5\_ENTCC Nickel-resistant membrane protein-like protein NcrC OS=Enterobacter cloacae GN=ncrC PE=4 SV=1  
BAC0083|copR|sp|Q02540|COPR\_PSEUB Transcriptional activator protein CopR OS=Pseudomonas syringae pv. tomato GN=copR PE=4 SV=1  
BAC0458|zipB|tr|Q7WJT8|Q7WJT8\_BORBR Putative membrane protein OS=Bordetella bronchiseptica (strain ATCC 49619) GN=zipB PE=4 SV=1  
BAC0056|cadC|sp|P20047|CADC\_STAAU Cadmium resistance transcriptional regulatory protein CadC OS=Staphylococcus aureus GN=cadC PE=4 SV=1  
BAC0033|arsD|sp|P46003|ARSD1\_ECOLX Arsenical resistance operon trans-acting repressor ArsD OS=Escherichia coli (strain ATCC 8739) GN=arsD PE=4 SV=1  
BAC0348|silS|sp|Q9ZHD4|SILS\_SALTM Probable sensor kinase SilS OS=Salmonella typhimurium GN=silS PE=4 SV=1  
BAC0682|merR1|sp|P22853|MERR\_BACCE Mercuric resistance operon regulatory protein OS=Bacillus cereus GN=merR1 PE=4 SV=1  
BAC0434|ychH|sp|P0AB49|YCHH\_ECOLI Uncharacterized protein YchH OS=Escherichia coli (strain K12) GN=ychH PE=4 SV=1  
BAC0640|copD|tr|C6FFR7|C6FFR7\_PSEFL CopD OS=Pseudomonas fluorescens GN=copD PE=4 SV=1  
BAC0455|ziaA|sp|Q59998|ATZN\_SYNY3 Zinc-transporting ATPase OS=Synechocystis sp. (strain PCC 6803 / FACHS-1) GN=ziaA PE=4 SV=1  
BAC0646|mdtB|tr|D0ZND9|D0ZND9\_SALT1 Multidrug resistance protein MdtB OS=Salmonella typhimurium GN=mdtB PE=4 SV=1  
BAC0667|merD|sp|P08654|MERD\_SERMA HTH-type transcriptional regulator MerD OS=Serratia marcescens GN=merD PE=4 SV=1  
BAC0165|fetA|ybbL|sp|P77279|YBBL\_ECOLI Uncharacterized ABC transporter ATP-binding protein YbbL OS=Escherichia coli (strain ATCC 8739) GN=fetA PE=4 SV=1  
BAC0625|copA|tr|F4ZCZ9|F4ZCZ9\_9XANT Copper resistance protein A OS=Xanthomonas alfalfae subsp. citri GN=copA PE=4 SV=1  
BAC0462|zntR|yhdM|sp|P0ACS5|ZNTR\_ECOLI HTH-type transcriptional regulator ZntR OS=Escherichia coli (strain ATCC 8739) GN=zntR PE=4 SV=1  
BAC0345|silF|tr|Q9ZHD1|Q9ZHD1\_SALTM Uncharacterized protein OS=Salmonella typhimurium GN=ORF96 GN=silF PE=4 SV=1  
BAC0106|cuiD|sp|Q8ZRS2|CUEO\_SALTY Blue copper oxidase CueO OS=Salmonella typhimurium (strain LT2) GN=cuiD PE=4 SV=1  
BAC0390|terE|sp|P18782|TERE\_ALCSP Tellurium resistance protein TerE OS=Alcaligenes sp. GN=terE PE=3 SV=1  
BAC0609|modA|sp|P37329|MODA\_ECOLI Molybdate-binding periplasmic protein OS=Escherichia coli (strain ATCC 8739) GN=modA PE=4 SV=1  
BAC0628|copB|tr|F4ZBX4|F4ZBX4\_XANCI CopB OS=Xanthomonas citri subsp. citri GN=copB PE=4 SV=1  
BAC0626|copB|sp|P12375|COPB\_PSEUB Copper resistance protein B OS=Pseudomonas syringae pv. tomato GN=copB PE=4 SV=1



BAC0681|merR2|tr|Q9WWL1|Q9WWL1\_BACSR Mercury resistance operon negative regulator MerR2 OS=Ba  
 BAC0351|sitC|tr|Q9XCS0|Q9XCS0\_SALTM SitC OS=Salmonella typhimurium GN=sitC PE=3 SV=1  
 BAC0304|pcoB|sp|Q47453|PCOB\_ECOLX Copper resistance protein B OS=Escherichia coli GN=pcoB PE=4 SV  
 BAC0490|G2alt|tr|B0FSM1|B0FSM1\_9BACI 7-cyano-7-deazaguanine synthase OS=Anoxybacillus gonensis GN  
 BAC0071|cmtR|sp|P67731|CMTR\_MYCTU HTH-type transcriptional regulator CmtR OS=Mycobacterium tuber  
 BAC0685|merR|tr|H6WCN2|H6WCN2\_9FLAO MerR OS=Tenacibaculum discolor GN=merR PE=4 SV=1  
 BAC0538|chrR|tr|Q7BD45|Q7BD45\_PSEPU Chromate reductase OS=Pseudomonas putida GN=chrR PE=4 SV=  
 BAC0255|mreA|tr|Q88IN0|Q88IN0\_PSEPK Putative uncharacterized protein OS=Pseudomonas putida (strain KT  
 BAC0587|arsD|sp|P52148|ARSD2\_ECOLX Arsenical resistance operon trans-acting repressor ArsD OS=Escheri  
 BAC0643|corB|tr|Q9X621|Q9X621\_SALTM CorB OS=Salmonella typhimurium GN=corB PE=4 SV=1  
 BAC0466|zraP|sp|Q9L9I0|ZRAP\_SALTY Zinc resistance-associated protein OS=Salmonella typhimurium (strain  
 BAC0690|merT|tr|Q934S7|Q934S7\_THIFE Mercuric ion transport protein OS=Thiobacillus ferrooxidans GN=me  
 BAC0653|merA|tr|Q934S5|Q934S5\_THIFE Mercuric ion reductase OS=Thiobacillus ferrooxidans GN=merA PE  
 BAC0066|chrF|tr|Q5NUZ7|Q5NUZ7\_RALME ChrF, regulatory protein, involved in Chromate resistance OS=Ra  
 BAC0468|zraS|hydG|sp|P14377|ZRAS\_ECOLI Sensor protein ZraS OS=Escherichia coli (strain K12) GN=zraS I  
 BAC0498|ideR|sp|P0A672|IDER\_MYCTU Iron-dependent repressor IdeR OS=Mycobacterium tuberculosis GN=  
 BAC0135|dpsA|tr|Q8KR86|Q8KR86\_BURPE DpsA OS=Burkholderia pseudomallei GN=dpsA PE=3 SV=1  
 BAC0659|merB|sp|P08664|MERB\_SERMA Alkylmercury lyase OS=Serratia marcescens GN=merB PE=3 SV=1  
 BAC0620|copA|sp|P32113|COPA\_ENTHA Probable copper-importing P-type ATPase A OS=Enterococcus hirae  
 BAC0162|fbpC|sp|P44513|FBPC2\_HAEIN Fe(3+) ions import ATP-binding protein FbpC 2 OS=Haemophilus in  
 BAC0693|merT|tr|Q79F00|Q79F00\_9PSED Mercuric transport protein OS=Pseudomonas sp. K-62 GN=merT PE  
 BAC0584|arsC|sp|O50595|ARSC\_ACIMA Arsenate reductase OS=Acidiphilium multivorum (strain DSM 11245  
 BAC0179|gesB|tr|Q8ZRG9|Q8ZRG9\_SALTY Putative cation efflux system protein OS=Salmonella typhimurium  
 BAC0470|zur|yjbK|sp|P0AC51|ZUR\_ECOLI Zinc uptake regulation protein OS=Escherichia coli (strain K12) GN  
 BAC0124|czcP|tr|Q1LAJ7|Q1LAJ7\_RALME CzcP cation efflux P1-ATPase OS=Ralstonia metallidurans (strain  
 BAC0578|arsB|tr|O50594|O50594\_ACIMU ArsB OS=Acidiphilium multivorum GN=arsB PE=4 SV=1  
 BAC0579|arsB|sp|P74311|Y944\_SYNY3 Uncharacterized transporter slr0944 OS=Synechocystis sp. (strain PCC  
 BAC0691|merT|tr|Q52397|Q52397\_PSEST Mercury transport protein OS=Pseudomonas stutzeri GN=merT PE=  
 BAC0252|mntP|yebN|sp|P76264|MNTP\_ECOLI Probable manganese efflux pump MntP OS=Escherichia coli (st  
 BAC0029|chrF|tr|A4UQR2|A4UQR2\_9RHIZ ChrF OS=Ochrobactrum tritici GN=chrF PE=4 SV=1  
 BAC0589|arsR|sp|P15905|ARSR1\_ECOLX Arsenical resistance operon repressor OS=Escherichia coli GN=arsR  
 BAC0347|silR|sp|Q9ZHD3|SILR\_SALTM Probable transcriptional regulatory protein SilR OS=Salmonella typhi  
 BAC0204|cnrB|sp|P37973|CNRB\_RALME Nickel and cobalt resistance protein CnrB OS=Ralstonia metalliduran  
 BAC0092|corT|coaT|tr|H0P0Y3|H0P0Y3\_9SYNC Cation-transporting ATPase E1-E2 ATPase OS=Synechocysti  
 BAC0332|rcnR|yohL|sp|P64530|RCNR\_ECOLI Transcriptional repressor RcnR OS=Escherichia coli (strain K12  
 BAC0105|cueR|ybbI|sp|P0A9G4|CUER\_ECOLI HTH-type transcriptional regulator CueR OS=Escherichia coli (  
 BAC0571|arsA|sp|O50593|ARSA\_ACIMA Arsenical pump-driving ATPase OS=Acidiphilium multivorum (strain  
 BAC0318|pstS|sp|P0AG82|PSTS\_ECOLI Phosphate-binding protein PstS OS=Escherichia coli (strain K12) GN=

ebruary); A (April); STP (sewage treatment plant); inf (influent); T (treated).

**Relativ abundance**

0.0015524080301735994  
0.002544224271673399  
0.00401204596686959  
0.0018503449248533808  
0.016710759998875134  
0.005607105832889033  
0.0020619856842320357  
0.0010437843165839586  
0.0007828382374379688  
1.1402685811421398e-05  
0.004149378640497388  
0.00011049833970351353  
0.0019247086688782213  
8.811166308825624e-05  
6.523651978649741e-06  
0.001168044354272525  
0.0028566728664403073  
0.0006895262768901558  
1.884610571609925e-05  
9.449300916150041e-05  
0.0176573513555453  
0.00013216749463238435  
0.0007067289643537219  
0.0018539308646302285  
0.00014283364332201538  
0.002244136280655511  
0.04189277659929485  
0.002329041124317937  
0.00040458612271258946  
0.00041316462531448356  
0.000742065412571408  
0.0015499297287205763  
1.6752093969866e-05  
0.00014308466905720344  
0.0002272353416486608  
0.0014134579287074438  
0.0003739542236580323  
0.001520980421017179  
0.0010345695272722221  
8.588098807336367e-05  
0.0015887982793572279  
0.0016653104323680428  
1.6649320387228787e-05

0.0034780249971371607  
0.00971621450252228  
0.006036796668659927  
0.00022920939384445035  
1.2610777059099869e-05  
3.126542883776834e-05  
8.811166308825624e-06  
0.000597437464679238  
0.005456345761973749  
8.45959857580515e-06  
0.000597761943418126  
0.0013861006784743966  
0.00039402384364693895  
0.00026994421980619613  
0.001335266639034266  
0.0020117122148115246  
0.0001641435013982838  
0.00019689280941607922  
0.0028269158574148875  
0.0032105687237783363  
0.006667622229213045  
0.004995508843924938  
0.003189340967339873  
0.0026007625888216966  
0.003083908208088968  
0.0032753232003151804  
0.0019031741875187168  
0.0021493192320497924  
0.005324621260548547  
0.0007167520379436879  
0.003911405285988998  
2.113581949469075e-05  
9.046130743727642e-05  
0.0013405052614193175  
0.0010684406390229497  
3.9331003233598434e-05  
4.6153728284324696e-05  
0.0015265345630040394  
0.00010202403094429668  
9.692282939708185e-05  
0.0005561145949012893  
6.951432436266116e-05  
0.01104671735051356  
0.015500921951491633  
0.02690281590973168  
0.002133301451162575

0.0011521015569841806  
0.00012319633308578498  
6.523651978649741e-05  
0.0003124485947669086  
0.00021576460254474052  
0.016327768952277635  
0.0029051071470880653  
0.0005342203195114749  
0.004289776199164533  
0.005200528907737696  
0.00010487488079826931  
0.00010350981780270877  
2.4761306780276383e-05  
0.0024967320852688287  
0.0004823173974736301  
0.0013310187069906787  
0.004588427588220234  
0.003040093118793715  
0.0018003356025600463  
0.00036184522974910566  
9.209861616917281e-05  
0.0029415739831002465  
6.571039281158093e-05  
0.002290903240294662  
0.0001400949451462245  
0.001549861560988302  
0.0006078686121146463  
0.002359860194015906  
0.002795505681221389  
0.0012915974420748982  
2.331476995806093e-05  
0.0048349257133182685  
0.00042075026715012283  
1.6835230912644492e-05  
0.002598356702985599  
1.3408296556908558e-05  
0.0035892712305758056  
0.003986121997739141  
0.004919825492202752  
0.0005953577820369196  
0.0005787808769683562  
0.024643095349349393  
0.0017554554415275666  
0.0008420600426342218  
0.0018973875924343988  
8.716828339780382e-05

9.475695611446551e-05  
0.0008480747572244663  
0.002371959086612179  
0.0022576535561104148  
0.0026169163937212105  
0.004142807663609782  
1.62310958320472e-05  
5.899650485039765e-05  
0.003064971929618246  
0.002110763840203116  
0.007999407845171315  
0.004566556385054818  
0.00018716132573229601  
0.0032238870203710208  
0.000967692274487505  
5.094817064677644e-05  
0.00016001410513669174  
0.003257802591628787  
8.86875563110553e-05  
0.0054833535829704036  
0.0032397042628920787  
0.0020030718075396917  
0.0007785604328618051  
0.003487410216623973  
8.420600426342218e-05  
6.619120056386078e-05  
8.534085607290227e-05  
0.0001884610571609925  
0.0033846067408504774  
0.003738980973589433  
0.0007851172424960124  
0.00013479333889660392  
0.0006330698891957283  
0.001584220866287328  
0.0001443531501658666  
0.019768915030473764  
0.0002094730103607601  
3.3587119097998664e-05  
1.4253357264276743e-05  
1.8639005653284975e-05  
0.0002800980849548696  
0.0009856558921737138  
4.6153728284324696e-05  
0.0035092748574805503  
0.002035379417338719  
0.0036505055166617447

0.0012991783514927995  
4.523065371863821e-05  
0.003408766499911932  
0.013135186079909326  
0.015791736858662475  
0.0030492575540654963  
2.09401174623325e-05  
0.002544224271673399  
0.0021587357456622778  
0.00020461486206050614  
0.002087568633167917  
0.000683522938658525  
0.0030021515772312487  
1.62310958320472e-05  
0.0015378422264336988  
0.004041888204644265  
0.004381719578993076  
0.002213414969209955  
0.003407112561775148  
9.209861616917281e-05  
0.032357313814102714  
0.005001668800747085  
0.0018988340476220754  
0.0004262574695997317  
0.0004111877610785291  
0.0029039135655935027  
0.0007591158666065153  
8.735533979994502e-05  
7.623143885163741e-05  
3.5428710484573e-05  
0.0001522727743644927  
0.0011921817673442978  
0.0002924395714567125  
8.698202638199654e-05  
0.00014469521924208905  
0.0044733613567883935  
0.001303707077772513  
0.0073109892864178135  
0.014359447593914259  
0.0027892236459826887  
0.0011759969966845933  
3.5521455799977643e-05  
0.022764849681529475  
0.0003392299028897865  
0.0001130766342965955  
0.014181694551364686

0.004792295453522381  
0.0023147452197185433  
0.00013340501799036548  
0.0035956433094121994  
0.0038643665313011282  
0.000294508275820715  
0.00015668817685440483  
0.026289256053736648  
0.0021742148216102146  
0.008904784950856896  
0.0010647361915518845  
0.0029528820562427006  
0.003755759639136922  
0.00013846118485297406  
0.007805478016335526  
8.986222593106928e-05  
0.0006057676837317616  
0.0018697711182901618  
0.0001730300175813676  
0.0029890187247631535  
0.000168213174986671  
0.001809226148745528  
0.0032207041363855214  
0.02186771274826723  
0.001036535814385459  
7.34794013479682e-05  
0.003716504763594397  
0.0014816938287140102  
0.003919480634740101  
0.0019421559325751134  
5.0443108236399476e-05  
0.013173207902101436  
0.00526937115822135  
0.0019120230890151604  
4.508038576608459e-05  
0.0029939151571767636  
0.0014691058786565556  
0.0008794849334179649  
8.273900070482598e-05  
0.00011198786340240544  
8.41065874933355e-05  
0.003202330283279584  
0.00017396405276399308  
0.011405143286811789  
1.9608664906924074e-05  
0.00040105998371206287

0.00023076864142162348  
0.0075674362952337  
0.0008698202638199653  
0.006422313695486249  
0.0002643349892647687  
0.00024068085152295494  
0.002054950373274668  
0.004278186036444441  
7.295266728812614e-05  
0.0036220563336439356  
0.0029994269810076886  
0.0004218402937489573  
0.0009787616870262693  
1.7176197614672733e-05  
0.0047094823828517  
5.384601633171214e-05  
0.00017508640149150272  
0.0036446187913778713  
0.0032038379717368726  
3.647400803828779e-05  
4.1490879032401716e-05  
9.000843919125858e-05  
9.663243688065854e-05  
4.593023234451055e-05  
0.00467557351690808  
0.008685639268261528  
0.0020196179308057637  
0.0013626859049653333  
0.004822005509294803  
0.00040904358752886095  
0.0009498762944439203  
0.00012540501640130407  
0.00015150741800519545  
0.0016046232929304244  
0.00014782842993001408  
0.0004095796865950849  
0.0006504106328505864  
0.00018177600097257432  
0.0012008720874378044  
0.0004053648835247965  
8.857973380727034e-05  
0.0004231676382830735  
3.531976727758248e-05  
2.2057404070585103e-05  
0.003422720914312926  
0.003188870417061732



0.0035040494699108567  
5.340213617089025e-05  
3.402758066986605e-05  
0.0003460789599911958  
0.008209364751361402  
0.0006220911141481085  
0.0023746907361098003  
0.0015394546840987672  
0.002134510312467106  
2.287099684368046e-05  
0.005795158738698725  
0.0007252027018199026  
0.009195180321925166  
0.0004905954487787281  
0.0008064339927540509  
0.0014204968221456806  
0.00012540501640130407  
4.852628895528723e-05  
0.00018296797474944368  
0.00026915706896421375  
0.00018448010677216633  
0.0012264886219468202  
2.8952130894205092e-05  
5.566606713075343e-05  
5.797946212839514e-05  
0.002513365424134533  
0.0002696628674830726  
0.0016651561250382834  
0.003567700919851986  
0.008578324964905733  
0.0004912432420649675  
0.0014600925523797067  
0.030907513273059864  
0.0028213335705518333  
0.0029506214778559706  
0.0004772459127575382  
0.0003815742379390107  
0.0008778351148091286  
0.00015831271574065335  
3.981348320945088e-05  
0.00025598730412192805  
0.001104478555909402  
7.739976740441098e-05  
0.0003444767425838291  
0.0010912172353410214  
0.0018455273673546246

0.0003957817893516335  
0.012510183943857564  
0.0001208777594915097  
0.0005580523229858032  
0.004448530973267612  
0.000531478402843622  
0.0017877000822921832  
0.0008585420353627741  
0.0016700835943370754  
0.0010942202411486335  
0.0019764353105747195  
0.0002644797739269209  
0.004046695207616351  
3.7079888570485266e-05  
0.0011905116223697135  
0.0024263144477643613  
1.554463295225078e-05  
0.0020926962111967617  
8.857973380727034e-05  
0.0010416976695734991  
0.0003934984328746048  
0.001265952028995572  
1.5352195955592933e-05  
0.0021923484117299407  
0.0018455273673546246  
0.002939256167182507  
0.0027476622009606337  
0.0005772955065370377  
0.0028439204921391886  
0.0017587103512279856  
0.003363603042654156  
0.002432535766861193  
0.0030227834161731  
9.677207913048609e-05  
0.003091407328861183  
0.002453847093980128  
0.00273375679919757  
0.0015630949587317334  
0.011930773801765444  
0.0010529289112939683  
0.001958078326265976  
5.264644556469841e-05  
0.001078055623949847  
0.0005177805058631163  
0.0007318718989977747  
0.0024097713947114226

0.0005979132031990747  
0.00010334302277514873  
0.0005900112665929196  
0.003095208239511422  
0.0018270752211634836  
0.0016622835152768605  
0.0033675571214660536  
7.440697639810709e-05  
0.001076446105251803  
0.0016018168530148053  
0.002910476967953168  
0.000213608544683561  
6.000562612750572e-05  
0.002184204791041208  
5.743248607058008e-05  
0.0018351336005879295  
0.0025458254734558954  
0.0019081789108546818  
0.002016189037884192  
0.001797117650293264  
0.00026806006780977443  
0.00029371174893989637  
0.0010982944654507828  
5.884558766106887e-05  
0.0015035606629669308  
0.0030172907751988306  
1.0372719758100429e-05  
0.011999172601872462  
0.0026507485341825646  
0.004907011805564821  
2.1018919886470925e-05  
0.0021281656385051815  
9.559782834874572e-05  
0.00023496939915191713  
0.0029536825771916695  
0.00143090339227129  
7.97217604265433e-05  
0.0033005429219393804  
0.001130641464804811  
0.00021593318422667108  
0.020482359986511895  
0.0009847982170337703  
4.650436024881693e-05  
0.010093468102699744  
0.0007030580447065235  
0.0015262969517560428

0.002052606245465023  
0.0007124072208329401  
0.0215660862073658  
0.002767201601582495  
0.0033839342989564663  
4.852628895528723e-05  
0.00011565851253591776  
0.0010529289112939683  
0.0003292344088411818  
0.005900760216707834  
0.002564512293332817  
6.270250820065204e-05  
0.010862370568540563  
0.0030656951649005496  
0.015036409813784141  
0.010391319117666678  
0.003076586247446882  
0.0009300872049763384  
0.002655050699668138  
0.00019789089467581674  
0.002079252766585219  
0.0028080339819030855  
0.0003256538754824315  
0.010851017391390615  
9.300872049763386e-05  
0.00033316556596167354  
0.0026056917804784586  
0.0007562064100685915  
0.0032507902309852604  
0.007985921173762355  
0.0011817578604405242  
0.0025567154885693185  
0.0020813140251218767  
0.0002744519621241655  
5.2895954785384186e-05  
3.577258480678225e-05  
0.001964344176910027  
0.003188870417061732  
0.002568028388961218  
0.0010002824657292697  
1.875806127683372e-05  
7.247432766049392e-05  
0.0018601744099526769  
2.9526577935756775e-05  
0.0009468544186397509  
0.004273247007246452

0.0009756159492758796  
9.621591775617295e-05  
0.0006074038889641395  
2.9141113471843508e-05  
9.630816695824024e-05  
0.009300872049763386  
0.0025286745885294204  
0.002677142900810272  
0.0030123239579856504  
0.001250037203488199  
0.0007909403002948391  
0.00022887550038018465  
0.000818476740379178  
0.0018098994258999022  
0.00024307179222612113  
0.0011187062885030087  
0.00020541803300090915  
0.0033141972020117568  
0.0001162609006220423  
0.00022174264489502113  
0.00035152902235326177  
0.0020009844250486967  
0.004898335019394425  
0.009443962388990515  
0.006157818736395069  
0.014150612475711435  
0.0016390347947834777  
0.001326266946766991  
0.0032335742079551205  
0.00016910676454115248  
0.0005911950773204336  
5.1433393823576323e-05  
0.006355595900671647  
0.0004348459659629635  
2.1463550884069353e-05  
0.0016643665773260795  
0.002033790688214927  
0.0015630349527829936  
0.0028331887166971543  
0.0022072218744960868  
0.003955813935089238  
0.0006764270581646099  
0.0015346438882109588  
0.00011831498013833282  
2.755813940670633e-05  
0.005032148114785277

0.002095214497852835  
0.011858611863448316  
0.0028936046377041644  
0.0014881395279621418  
0.0055116278813412654  
0.002349693991519171  
0.0017736546699548782  
7.575370900259773e-05  
0.0010107986994390065  
0.0001490853538995585  
0.0008001648329395031  
3.2733118505149175e-05  
0.0009451365791998586  
0.0005414993032708964  
0.00026882944134016135  
0.0005922648629525429  
0.0008568938442717642  
0.0001989761219368123  
0.0010967867832454498  
0.0013475202235306706  
0.00016061420012272352  
5.0138824376934846e-05  
0.0009589050162088789  
3.875761884352019e-05  
0.0009101471340287666  
0.0021058306238312635  
0.0006846542914919379  
0.00011434374428043061  
0.0010341551281843958  
0.0007019435412770879  
0.0009290429222784987  
0.0143354138189155  
0.0006731753633558958  
8.151602414830698e-05  
0.0011746810282596166  
0.0001702018412288343  
0.0004142617620651667  
6.074511414897877e-05  
0.0001427257378815482  
3.5491527367942646e-05  
2.5439564583196476e-05  
0.0016198697106394335  
0.001719086730416099  
0.0005509440585605051  
0.0008657804706115688  
0.0008000317217175542

0.00021672356334455546  
0.0005025277625051879  
5.221067662391563e-05  
0.007679020292074349  
0.002097793102366259  
0.00276006926424486  
0.006984832562144544  
0.0006774000608128541  
0.0004704515223452823  
0.0007520823656540227  
0.009302680338243606  
1.9680660035806204e-05  
6.793002012358915e-05  
0.0001116164641606677  
0.0061504428075841  
0.0031587459357468955  
0.0058998064585024665  
0.00021943756043579899  
1.640906979608777e-05  
0.00013230349469096946  
0.0131195640854033  
0.005530878097611296  
0.0010002695463198503  
0.0007553522889829533  
3.5227649841043444e-05  
4.822512879002894e-05  
4.882142095435696e-05  
0.000686683899075412  
0.0005994700316016005  
0.00020055529750773938  
0.0006028141098753618  
0.0027074965163544815  
0.001256109494916894  
3.65172940548774e-05  
0.0013964982031723118  
1.4292968035053826e-05  
1.7646625339368134e-05  
0.0010241840754749163  
0.0011192406858945693  
0.0007520823656540227  
1.5993650307579217e-05  
3.8521291899352386e-05  
0.00032083997412664963  
0.0013441472067008066  
0.000545164273174591  
0.00045889771463635286

4.062695737295042e-05  
0.004913604788939615  
3.378337899194541e-05  
4.334471266891109e-05  
8.713781891715574e-05  
0.00045275358412372174  
0.0013115900079225865  
0.0003892293570114658  
0.0005849529510642399  
0.0002699782851065723  
0.0008808041551601921  
0.00016198697106394337  
4.2976135180229874e-05  
0.0002604526850184401  
0.0009283337292080572  
0.003008329462616091  
0.0026465168650852368  
0.001326151186247457  
0.0006803452784685623  
8.982215931033827e-05  
2.7467355963016482e-05  
0.00697102551337246  
0.00021598262808525783  
0.0005969283658104369  
6.370580038481134e-05  
0.000191439147621024  
0.0018435385532472987  
0.000286637562227486  
4.2976135180229874e-05  
0.0006891809314356863  
0.001533371813469367  
1.3556849509643329e-05  
0.004932697653262352  
0.0056094970927919015  
0.00034711493799416437  
0.0009384072806462925  
0.0004020222100041503  
0.0005059463187127061  
5.411127941322305e-05  
0.00010189503018538373  
0.0005467060273408089  
0.0009578868541615134  
0.009996910214231932  
0.00010892227364644468  
5.997618865342207e-05  
5.264576559578159e-05



0.0018924645253813998  
0.0012745816933715543  
0.0005889187337833195  
0.001693599556678181  
3.342588291795656e-05  
0.0019392300997939803  
0.007107178355430515  
0.00012290840216913992  
0.0006673406906507526  
2.734844966014628e-05  
0.0004512494193924136  
0.0005893182715945701  
0.000743234337822799  
0.0002589136012907291  
0.006918404740371799  
0.00018258647027438702  
0.0016659139524144585  
3.21500858600193e-05  
0.0018898479957460059  
0.0002707496516354482  
0.0005959897991975275  
0.003049823662100451  
3.081703351948191e-05  
0.0002208913241781046  
7.295025255766502e-05  
0.001674869938023935  
0.0012102474849604965  
0.001702042712950997  
4.9115583063119846e-05  
0.00012603475055349207  
0.0010324305782207753  
5.849529510642399e-05  
0.0008070804593538323  
0.00064667239629464  
0.0007358442236683108  
0.001986427856500625  
0.00011645146306900998  
3.127471223511778e-05  
0.00043475212879097056  
0.0009871081049209049  
0.0060564384883742125  
0.0005604226660196105  
0.004030124124918453  
0.0033843706454431024  
0.0011305893923028506  
0.000238395919679011

0.0015572174352579888  
4.088991502584978e-05  
4.268575588847157e-05  
7.098305473588529e-05  
1.2149022829795752e-05  
0.001139998533201887  
0.0020150620624592263  
0.0003217241230853319  
5.4227398038573314e-05  
0.0009462322626906999  
0.0013657548946134025  
0.00976464504485236  
4.480490689002688e-05  
0.000329036034973635  
0.0008267030378712578  
0.0017610707429385347  
0.00018858184691026244  
0.0015233668342609142  
0.0005083039436834084  
0.001106175619522259  
0.0014672884346695256  
0.0007871635239241465  
0.00014957849835013154  
0.0005264576559578159  
0.0012993422998107797  
0.00029799489959876375  
0.0003220682130565462  
0.0004968813831511971  
0.00012306802347065827  
0.0008510610811338787  
0.0021236955707990795  
1.248516180137113e-05  
0.003089431761608249  
0.00033603680167520165  
0.00022402453445013445  
8.806912460260861e-05  
0.0017972175151663374  
0.00046328273724287805  
0.0006843949527451607  
0.001332849914569016  
0.0009268906992925255  
0.00031587459357468957  
2.0645398272855528e-05  
0.0010529153119156317  
0.005314967972490998  
0.000982720957787923

0.0011772753881261395  
9.63833711323602e-05  
0.0003867852166220688  
0.008990276894048856  
0.0015089550648472432  
0.0013687899054903214  
0.0016169413067857563  
0.00015543916731267676  
0.00065807206994727  
0.0024227718465207734  
0.0005114818364229109  
0.0012726986051795743  
0.0007336442173347628  
0.0008265877215038604  
0.003054611454348646  
0.00163518653025293  
0.0005743174428630719  
0.007809121896707603  
4.4178264835620925e-05  
0.0011821463662956189  
0.009432366335910868  
8.367538902640784e-05  
0.005012224955895901  
0.000110188811712101  
4.897280520537823e-05  
0.0005559392846914535  
0.00010529153119156318  
0.0006405848401165032  
0.0010822794839610876  
6.3813049207008e-05  
0.0014641397470414796  
0.0007616834171304571  
0.00025269967485975163  
0.0015154677032774124  
0.0005615548330216703  
0.007856368096601254  
0.0019671905293797394  
0.0003136343482301882  
0.00043736482187264707  
0.00032397394212788674  
0.0004367397917592171  
0.0017104126464306335  
5.959897991975275e-05  
0.0012607575969141623  
0.0002485570572391  
2.1342877944235784e-05

0.00035097177063854397  
0.005776671777132611  
0.0008964008736579027  
0.0006829720942155451  
1.7379620004109465e-05  
0.0010344431134609716  
0.0006597380751876428  
3.8521291899352386e-05  
0.0017109873818629015  
0.0002455139021149246  
0.0005768621514050863  
0.0011215400314788248  
9.642508807226483e-05  
0.0003222903758937112  
0.0006589047684938096  
2.025322034304743e-05  
0.0005827048973074508  
0.001783118574532217  
0.00045704377005350953  
0.0002928465637750265  
0.00010242043033582534  
0.0006289545517440909  
0.0006481030509775178  
0.0010315378050449204  
2.614701462277022e-05  
4.1124430765910445e-05  
0.009449128822905732  
0.0008309197301802467  
0.00041469530884225784  
0.0003294523842469048  
0.0074760348732951475  
0.0004229103506180553  
0.005429920763881254  
0.0006652403912677886  
0.0025602884275048895  
1.3727182676954368e-05  
0.000951868846941298  
0.0007337149168817531  
0.0015278039956488144  
0.0007289401994183143  
0.00010576949315893496  
0.015873614877350867  
4.565160058848565e-05  
0.00021547122761171974  
0.00021179081844443883  
2.8565235628344346e-05

0.0004736535875754222  
0.00025342491095915753  
0.00024708928818517866  
0.00015323366709158365  
0.0013629225924968388  
0.0007751820805809525  
0.0062078631081234955  
0.00017895045940987867  
3.47401459662817e-05  
0.0006911588480704297  
0.00085944100238323  
5.831015650387696e-05  
8.82461743518495e-05  
0.000201705541375656  
0.0003346312004442564  
0.0018744704620944584  
3.3617590229276004e-05  
0.0066417600664176015  
0.005636086242901594  
0.000857346847893992  
0.0001401925039348531  
7.97062219952189e-05  
3.390590575439844e-05  
0.00013601245221202496  
0.0007306920584464426  
0.000596114084885835  
0.0009265848306944198  
8.64452320181383e-05  
0.0026609615650711542  
0.0003074888919637778  
0.009992182203532497  
0.0004632924153472099  
0.0097462997006376  
0.0007768746178747974  
0.0003188248879808756  
0.0003825898655770508  
9.533991827080848e-05  
1.8035714466071428e-05  
3.638124488616127e-05  
2.3644907960304173e-05  
0.0008948907821596006  
0.00022462662562288966  
0.00042765453724357837  
0.0011422274640078935  
0.0058569312755005305  
3.492428101557295e-05

4.6620620412297854e-05  
0.0010291983573994217  
0.0009224666758913335  
0.00021028875590227967  
0.008854032826635567  
0.0006610031913234077  
0.002914386476030312  
0.007893130039248762  
0.0005046189688288859  
0.0005490873070781747  
0.001155973278059315  
0.00020343543452639064  
0.002509621610407457  
0.0012823621285559903  
0.00011063699470978146  
4.9294621084324906e-05  
0.00021179081844443883  
2.776284136912119e-05  
0.0005193338076798499  
0.0006225871828287964  
0.0005791155191840124  
0.0009906610155676159  
4.2327929453563786e-05  
0.0006225871828287964  
0.0001256386211111078  
3.589674888888794e-05  
0.0007389586188715621  
0.0010555270563250348  
0.0002576286417096649  
0.0006839841887478994  
0.000529477046111097  
4.821254403613241e-05  
3.188248879808757e-05  
0.0022193367083426126  
0.00042057751180455934  
0.0002428395952679888  
0.0011724414117877653  
0.0003112935914143982  
0.0006713784667837816  
9.503434160968409e-05  
2.7607741696668003e-05  
0.0005714270476231112  
0.0007581148614772525  
0.0003010224830682379  
0.0030918914110128395  
0.0006413004426180208

0.00024864330886558854  
0.00023074486056203449  
6.459850671507938e-05  
0.0003680053228289894  
0.0007127575620726306  
0.00016127039788310025  
0.008821700206280758  
0.00043240625432406255  
0.00010861067612535325  
0.0006177232204629465  
0.008009101065312685  
0.0013632512451596062  
0.0016695222174674229  
0.0009276998545580714  
0.001127494810165378  
0.0001840026614144947  
0.00034081281128990154  
0.000411815480308631  
2.73783144803522e-05  
2.8648033412774332e-05  
0.0008411550236091187  
0.00419186496687696  
0.0010295387007715777  
0.001715897834619296  
0.00133656839160666  
0.000411815480308631  
0.00047823733197131346  
0.0002635619073975239  
0.0007021116385589775  
0.00018218565027478608  
0.010571124329313729  
0.00032562154256961527  
0.0011188948898951485  
0.002697877792258118  
0.0009845703437263821  
0.00013356177739739386  
0.00792389786249021  
0.00043539962675802406  
0.001045377757706525  
8.375908074073851e-05  
0.013000265957924738  
6.79750448927589e-05  
0.00047683897719946744  
0.0001919140102409154  
0.0001411938789629592  
0.00025342491095915753

0.00013986186123689356  
0.00045268266537742643  
0.003337309866397218  
0.0003488319362614286  
0.0003495797003262977  
0.016941276829372527  
0.00038893684251370707  
0.0007837193281644432  
0.0012484511403040605  
0.006441970727685014  
0.0008662891378603872  
7.959923377777567e-05  
9.368314243987816e-05  
0.0014368187683014792  
0.0010283484826203967  
4.472204311043957e-05  
0.00036605820471878316  
6.723518045855201e-05  
6.376497759617513e-05  
4.983313375163267e-05  
0.00027480687851851125  
0.000100852770687828  
0.00015523934336241586  
2.776284136912119e-05  
3.674190158887414e-05  
9.151455117969579e-05  
0.001049283278594594  
8.447497031971919e-05  
0.0005004340013877036  
0.0003930965948400569  
0.0003240515254887589  
0.000921783873022428  
0.0006868891409008826  
0.00022210273095296952  
9.983405583239541e-05  
8.985065024915585e-05  
0.0083630220616522  
0.0014020880538879901  
0.002896908895964163  
0.0013727182676954368  
6.839841887478993e-05  
0.00046620620412297854  
0.0003504812598371328  
0.0003329571968452761  
0.000130908232151088  
3.0599292654511284e-05



0.000532192313014231  
0.0013641064843347376  
0.0007844104386831067  
0.0013072459334847123  
2.2361021555219786e-05  
0.0009883571527407146  
0.000291646372939883  
0.002715266903133831  
0.0002823877579259184  
0.00025342491095915753  
9.151455117969579e-05  
0.0001550364161161905  
0.0004878545360877384  
0.0012583857647627135  
0.00040223837611540707  
0.0005757420307227464  
0.00035020529034119805  
0.0004463548431732259  
0.0005068498219183151  
0.001688296915713676  
0.00010627496266029189  
0.0009120033812843502  
3.674190158887414e-05  
0.005282598574993473  
0.006469471725699545  
0.00040506440686094853  
0.0008557204785633891  
0.0002635619073975239  
0.00045416849469485785  
0.002823877579259184  
0.018769282467912606  
0.004345363343946244  
0.0002153804933333276  
0.0003916566805732434  
0.0010017133304804538  
0.0002931567825925848  
0.0006688131108771752  
0.00047942697707571973  
4.533748407067498e-05  
0.0006853571497107145  
0.0003129797650345596  
7.844104386831067e-05  
4.728981592060835e-05  
0.00023347019356079868  
0.006248807187353132  
0.00023720571665777147

0.00011360427042996718  
0.004783258939300942  
1.0449441630603325e-05  
8.266439468170352e-05  
0.004303661784975286  
5.132645817327083e-05  
0.0008415542355129392  
0.00019644950265534247  
4.655634124266945e-05  
6.422387586809273e-05  
0.00021742457976177228  
0.0005671440263184582  
0.0007024486423072643  
0.0006352579026083086  
0.00030922606899452056  
0.0003975763744215264  
0.0003384771836291374  
0.0008882025386012824  
0.004899060944318149  
0.001024739105903371  
0.0001873196379486038  
0.0005218189914282535  
1.8889375255321393e-05  
0.00012905868040080464  
0.0001626448804451699  
0.001926716276042782  
1.1484324433083982e-05  
0.0007883274033594215  
0.000905542718313672  
0.0010633292655519127  
0.0021332512072485426  
0.015891760193496807  
0.0002013449484610624  
1.6969723298479788e-05  
0.00018762031152476526  
3.5756333459751844e-05  
0.0001480337564335471  
0.0014985571035888304  
6.843527756436112e-05  
0.00011927291232645792  
0.007492785517944153  
0.0019211396732177666  
0.005131439149964488  
0.0006822224946299345  
0.0003058279803242511  
0.0002783034620950685

0.00033782501179170166  
0.0008022270615551797  
4.925724992833071e-05  
0.00024984849464893926  
0.00011800853516398665  
2.839831245868046e-05  
0.0006802973517879452  
0.00010585234691413064  
0.0024179004786819554  
0.0009164878787931688  
0.0007347211399309808  
0.0014163658338766881  
0.004318501998026926  
0.0009595025022488639  
0.0006687389016362083  
0.0007298167712283264  
0.0009532441418216914  
0.0008445625294792542  
0.0007496554524743923  
0.00043078914280072025  
0.0014343105257497695  
0.00025768839082876714  
0.0023391885822645845  
0.0005944345792321852  
0.00018692023573549374  
0.007677545508666128  
1.650020526255347e-05  
0.0009369735797990282  
5.403950720292593e-05  
0.003774735690106352  
0.0006261827897139041  
8.882025386012825e-05  
0.001086527215028692  
0.0012033405923327696  
0.0009108113304929515  
6.843527756436112e-05  
0.00024083953450534774  
0.00046764106335646756  
0.0008138115678592256  
3.4500429185339074e-05  
0.00025110086805570087  
0.0011564637107328859  
0.0003287048764902384  
0.0007792496938661918  
0.00046018682708633374  
0.00026932593105974373

0.0013304092730015195  
0.00013323038079019237  
0.000407671087053323  
0.00020530583269308332  
0.0010741537133493872  
0.0005773316500908336  
6.900085837067815e-05  
0.008089209579183508  
0.00033968516786764253  
0.00019326629312157534  
1.300483467733965e-05  
0.008165607074657504  
0.00010669781294379624  
0.000243769455849695  
0.0004245307048907825  
4.826071597024309e-05  
0.00038266726038071916  
3.7107128279342466e-05  
5.12214960911169e-05  
0.0005833435013346414  
2.3452538940595658e-05  
0.00025689550347237093  
0.012620392291797757  
0.0004201955992245017  
0.001055633821739915  
0.000467082733586129  
1.1595977587294522e-05  
0.00017038987475208274  
0.000666716097940999  
0.0003478793276188356  
0.0001427197241513172  
0.0002783034620950685  
0.001159597758729452  
0.0009553301535378794  
0.0008827246374821556  
0.0011753592816636388  
2.179922679595837e-05  
0.0003664682993236589  
2.8111460817683687e-05  
0.0002368540102936753  
0.0003290287236591943  
0.0002629639011921907  
8.742517133876498e-05  
1.0410353943705803e-05  
0.007706865104171128  
0.0002783034620950685

0.000530663381113478  
0.00017369841600940478  
0.00019461780566088705  
0.0004506618562334916  
0.0006217417770208977  
3.994786537249787e-05  
0.002029296077776541  
0.000117386346050644  
8.535329227822733e-05  
0.0026023180871227185  
0.008117184311106165  
0.0006644615530989525  
5.641286393818957e-05  
0.005256843172906849  
0.00011927291232645792  
0.0002946742539830137  
0.0010703979311348787  
0.0022937098524318834  
0.00040817841107276717  
0.0001617259828155362  
9.381015576238263e-05  
0.01125404863615978  
3.245521423849195e-05  
0.00045130291150551657  
0.0006853741976968105  
7.730651724863014e-05  
0.00011542539902560446  
0.001330439260588066  
0.00016424466615446668  
0.001267915486335699  
0.00026932593105974373  
0.00018762031152476526  
0.00019481242346654795  
0.00010738397251256662  
0.0002530031473591532  
0.00030281723854903825  
0.0007445060769422214  
0.003952083646679186  
0.00023719045064920613  
0.0007019158114787127  
0.00019722292589414303  
0.00569986898329323  
0.007943244647296748  
0.0004039888965896156  
1.432093286938603e-05  
0.006551727336821404

0.00021136971804688745  
0.0014940501649314203  
0.000800122453523322  
0.00017515602509479835  
0.005686027630735451  
2.3452538940595658e-05  
0.00016009786889457442  
5.386518621194875e-05  
0.0002087275965713014  
0.000671766977470855  
0.0010144523497775883  
3.4884835081554546e-05  
0.00011079379533642538  
0.00022264276967605482  
0.0034500429185339073  
0.0007147092800885027  
0.000335036270579938  
0.00013849224417053174  
0.0010096590717867601  
0.001549506175420141  
5.679662491736092e-05  
0.0016444000947767607  
0.00011058415712386828  
0.0006513485283076071  
0.0005614894410689978  
0.0008563183449079031  
0.0013915173104753424  
5.679662491736092e-05  
0.00018378530515712069  
0.0005417357468262783  
0.001277357353740115  
5.963645616322896e-05  
0.007171666138603689  
0.0005301018325620352  
0.0002541031610433234  
0.0002912478091692577  
0.0007802900806403789  
7.13598620756586e-05  
0.00013096633510356165  
0.0005619589138458114  
0.00022363671061210858  
0.0010568485902344375  
0.00036157536413926225  
0.006189852863838593  
0.0006361221990744424  
0.0005492831488718458

7.784712226435482e-05  
7.71279802572938e-05  
0.003022951398618848  
0.000962578722052118  
0.007935098712627986  
0.0024471511322152572  
0.0006513485283076071  
0.0001926716276042782  
0.0019235680468335616  
0.0019433258991121162  
0.00043242370604413036  
0.0003072181075075432  
0.0018349678819455067  
0.00014562390458462885  
3.248678545856831e-05  
0.0002119061894124887  
0.00034114617934234205  
0.00031296519921210846  
0.00018316132788706517  
0.0005925170483314362  
1.0842992029677994e-05  
0.0003710712827934247  
0.0013976473426800795  
1.978460631007596e-05  
0.00022770283262323786  
0.00018089725036179454  
0.0001002465300857022  
3.362055246786063e-05  
0.00019563445623598527  
0.004600908473785642  
0.0005767365386988415  
0.0002043681373179489  
0.00045518357857179525  
0.0008087790161577559  
0.0003175384700061541  
0.0001868508684049818  
0.0003338012909526499  
0.022658138178181516  
0.0011444615689805138  
0.004866384093877631  
0.013194968677657688  
0.0004999361029379547  
0.0012555743426679422  
0.0003906695946629325  
0.0002362759368217835  
0.0007493983227488062

0.000404843548210794  
0.00016233497432347713  
0.00026326272513289774  
0.0042917308836769264  
0.0003965063703554536  
0.00548584884304709  
1.701801589562102e-05  
4.142847308526747e-05  
0.0012581351867288193  
0.00011738067374159115  
0.0001461014768911294  
1.9074359483008564e-05  
0.0011794451103903985  
0.014396806327970782  
0.007375419000096644  
0.001266685620036685  
2.7913696804402778e-05  
0.00252368448544421  
0.00038415493224520746  
0.0011551574714943503  
0.00032314209006508625  
0.007150520216109656  
3.567152942276926e-05  
0.0010930865033242732  
0.009287470354530227  
0.00047993549666924774  
0.0010140798712485566  
0.0013038533307833207  
0.0004161678432656414  
0.00016646713730625654  
0.008519880569077157  
0.00032441430301809843  
2.6461539167179507e-05  
0.007453672782591039  
0.0003431292455444319  
4.893713220130477e-05  
7.50466602610173e-05  
0.006371229353087396  
0.00017274891607253038  
3.6046033668677594e-05  
0.00039367228417020133  
0.0004954379086495731  
0.000305189751728137  
2.5574560200681873e-05  
3.783344029687649e-05  
6.634559820176891e-06



0.0001493935847620251  
0.000329604931866388  
1.1233978591219767e-05  
0.00047685898707521413  
0.009013843793998638  
1.617613525060797e-05  
0.00031692781910229613  
0.0005544104486410793  
0.00046605331544690874  
0.00037428931815714915  
0.0019992687351553027  
0.0004979718277243457  
5.708037750526253e-06  
5.143647501036017e-05  
0.0004373033322827598  
0.0004901868063147029  
0.00013307692662564114  
0.00021193732758898403  
0.00010506532436542422  
0.0013987863620872948  
0.004735703044057299  
0.0003965063703554536  
7.0754965624761285e-06  
1.0670970340144652e-05  
1.8166056650484344e-05  
0.0005404401853519093  
4.743882151214565e-05  
0.0008269657788762422  
0.0002615912157669746  
0.0001831138510368822  
0.0005288486672545334  
1.4719762945086993e-05  
0.00041418609163104307  
2.641065159185801e-05  
7.629743793203426e-05  
1.4911551387368257e-05  
0.0025823748223150057  
0.00038960393837634514  
0.00024415180138250963  
4.199858968735831e-05  
0.0003920840560396205  
0.00015650756498878821  
0.00017952338336949236  
0.0006651571512023499  
0.0020934868642422133  
0.003673580344875723

0.00023652205758930618  
6.063372550890139e-05  
2.9534492102722936e-05  
0.003083688116419718  
0.00028811619918390563  
0.00015518122969227305  
3.157135362704866e-05  
0.0006684465801125124  
0.004222668547617758  
0.0006404240904139663  
3.325312064834423e-05  
3.1141811400830306e-05  
0.008250075136389964  
5.945254903794877e-05  
9.34254342024909e-05  
0.0006367074926018352  
0.0025257082901638927  
2.9408006055173802e-05  
7.41780646561444e-05  
6.989078283850466e-05  
0.0001578567681352433  
7.732848439057526e-05  
6.343435948159892e-05  
3.6868560611452795e-05  
0.008401102506362453  
0.0008595955889285956  
0.0009253093536438197  
0.00044960990209948757  
8.438426315063695e-05  
4.896092273713428e-05  
0.0024467799060962706  
0.0007945022462344062  
0.00044187705366043  
3.403603179124204e-05  
0.00016954986207118723  
1.8647031673816926e-05  
2.190357069819165e-05  
0.0010347186788043  
0.0006946926255290277  
0.00032976011309608026  
0.0006539780394174364  
0.0003879530742306826  
2.8345797374130374e-05  
1.2110704433656229e-05  
0.00021047569084699103  
0.005789105212741898

0.002655547190361712  
0.00011416075501052507  
0.000143957430060442  
0.00026035144697187046  
0.00026334686151037706  
0.0011216230897769116  
2.355667037352687e-05  
0.001298523703266352  
0.0081495724912019  
0.004738986464834511  
0.0012117828377440733  
0.00010201328748572824  
1.7188409046015225e-05  
2.0345983448542467e-05  
0.00038439930561177564  
4.5325210652693616e-05  
0.001104997376946703  
0.0002956525719866328  
0.00031655319993078044  
0.0020923136213387124  
0.0006866769413883082  
0.0066320080663999  
0.0005543485724749364  
0.0012991185377616641  
4.671271710124545e-05  
0.007884068586310206  
0.000558453157255339  
0.0008754447061524249  
0.000160908480700248  
4.76858987075214e-05  
0.0004201188038029734  
0.00032454880314372776  
0.00011626276256309982  
0.0024649941485734143  
0.0006291192250536157  
0.0013366612217864018  
0.0008243631224840482  
0.00240731571406246  
0.0006493398972939085  
0.00041697437009367556  
0.0008545313048387836  
0.0008001613658754517  
0.0008350148786553104  
1.0670970340144652e-05  
0.0001525948758640685  
0.0005977442589579753

1.3503971315404292e-05  
5.143647501036017e-05  
0.00041901051979067994  
0.0006372280450893729  
0.00021799267980581212  
0.0007262929187760952  
0.0011072000295253342  
2.8973710607101613e-05  
1.1303324138079148e-05  
0.0002667235047802386  
0.00015430942503108052  
0.0003377099711745778  
0.0006963067151078854  
0.0002539217427215086  
0.002112852127348641  
4.199858968735831e-05  
0.002445122617191964  
0.00018590238683947432  
0.0003675642995265884  
0.00010093824473498696  
0.0012109733635705636  
0.0008109937458509935  
0.0007629743793203424  
0.001593171170915605  
0.0010228159792190275  
0.0005478805383417354  
0.001250336868313513  
1.4815036491657137e-05  
0.0004127566314355951  
0.00011444615689805139  
0.0007000328309257066  
0.0002080839216328207  
0.0003483143905592868  
0.0004988678634017624  
0.00015238323248561626  
0.0010652296142049397  
0.003972511231172032  
0.00020345983448542468  
0.00016927727386850043  
0.0005194719178351268  
0.00042917308836769264  
6.832606381973217e-05  
4.7935563098660264e-05  
0.0004631284170193519  
8.678381565729015e-05  
1.3956848402201389e-05

0.00014194872173401723  
0.0008003227755108487  
0.0006804906626370623  
8.285694617053494e-05  
7.759061484613652e-05  
0.0001476724605136147  
2.4612076752269116e-05  
0.0014938235216166707  
0.0005722307844902569  
0.0007663354999340885  
3.0316862754450695e-05  
0.001065533184912892  
0.0014417772078971595  
0.00022889231379610278  
0.0002559655982235988  
0.0002985551919079601  
0.0005934245172491552  
0.0014467721721074418  
6.926589963568447e-05  
1.2859118752590042e-05  
0.0029203502105020008  
0.0005519389126998223  
0.0002299771114918189  
0.0008299019564537059  
0.0008393638527625481  
0.00022409037714303767  
2.3905202485232665e-05  
0.006708912645747839  
0.0002922029537822588  
0.00045778462759220556  
0.00015650756498878821  
0.0007027395599003155  
1.1589484242840645e-05  
2.1391805027673154e-05  
0.00040691966897084936  
0.0002712797793138996  
0.0001491922456990035  
0.001018769257936411

---
