# Supplementary material for: Novel antibiotic resistance genes from the hospital effluent are disseminated into the marine environment in Norway
Source: bioRxiv or medRxiv preprint supplement (doi:10.1101/2024.09.23.24313887), 2024-09-24
Supplement: Supplementary file [file media-7.pdf]

STP-T-eff-A  
STP-T-eff-A  
STP-T-eff-A  
STP-T-eff-A  
STP-T-eff-A  
STP-T-eff-A

---

**Legend:** eff (effluent); F (I



: Detected virulence genes across samples.

VFG000881(gb|WP\_000930062) (papB) regulatory protein PapB [P fimbriae (VF0220) - Adherence (VFC0001)]  
VFG022146(gb|NP\_214805) (mycP3) Type VII secretion system membrane-anchored mycosin MycP3 [ESX-3 (VF000008)(gb|WP\_010930612) (fimC) outer membrane usher protein precursor [Fimbriae (VF0031) - Adherence (VFC0001)]  
VFG012513(gb|WP\_001221122) (iroB) glucosyltransferase IroB [Salmochelin siderophore (VF0230) - Nutrition (VFC0001)]  
VFG049133(gb|WP\_004177236) (acrA) acriflavine resistance protein A [AcrAB (VF0568) - Antimicrobial activity (VFC0001)]  
VFG048787(gb|WP\_004176417) (sciN/tssJ) type VI secretion system lipoprotein TssJ [T6SS (VF0569) - Effector delivery (VFC0001)]  
VFG000630(gb|NP\_708742) (sigA) serine protease, autotransporter SigA [SigA (VF0119) - Exoenzyme (VFC0001)]  
VFG000209(gb|NP\_250405) (exsD) type III secretion system regulatory protein ExsD [TTSS (VF0083) - Effector delivery (VFC0001)]  
VFG001447(gb|CAA50007) (cnf1) cytotoxic necrotizing factor 1 [CNF-1 (VF0240) - Exotoxin (VFC0235)] [Enterohemorrhagic E. coli (VFC0001)]  
VFG040545(gb|WP\_011190491) (sca1) cell surface antigen Scal [Scal (VF0498) - Adherence (VFC0001)] [Richardsonella (VFC0001)]  
VFG000212(gb|NP\_250408) (pscD) type III secretion system basal body protein PscD [TTSS (VF0083) - Effector delivery (VFC0001)]  
VFG002063(gb|NP\_248767) (icmF1/tssM1) type VI secretion system protein IcmF1 [HSI-I (VF0334) - Effector delivery (VFC0001)]  
VFG049095(gb|WP\_002912373) (rfbA) O-antigen export ABC transporter permease RfbA [LPS (VF0561) - Immunomodulation (VFC0001)]  
VFG049843(gb|WP\_003155066) (exlB) hemolysin activator protein [Exolysin (VF0582) - Effector delivery (VFC0001)]  
VFG016058(gb|NP\_251114) (pvdL) peptide synthase PvdL [Pyoverdine (VF0094) - Nutritional/Metabolic factor (VFC0001)]  
VFG038764(gb|WP\_017409846) (flrA) FleQ protein [Polar flagella (VF0473) - Motility (VFC0204)] [Aeromonas (VFC0001)]  
VFG000165(gb|NP\_252915) (pchF) pyochelin synthetase PchF [Pyochelin (VF0095) - Nutritional/Metabolic factor (VFC0001)]  
VFG048697(gb|WP\_015874721) (clpV/tssH) type VI secretion system ATPase TssH [T6SS (VF0569) - Effector delivery (VFC0001)]  
VFG038176(gb|WP\_000777882) (ompA) outer membrane protein OmpA [OmpA (VF0464) - Immune modulation (VFC0001)]  
VFG011515(gb|WP\_004683743) (wbdA) mannosyltransferase [LPS (VF0367) - Immune modulation (VFC0258)]  
VFG000366(gb|WP\_002212761) (ybtQ) yersiniabactin ABC transporter ATP-binding/permease protein YbtQ [Yersinia (VFC0001)]  
VFG038859(gb|WP\_005314301) (lfiR) lateral flagellar biosynthetic protein LfiR [Lateral flagella (VF0474) - Motility (VFC0001)]  
VFG012597(gb|WP\_000089593) (chuA) Outer membrane heme/hemoglobin receptor ChuA [Chu (VF0234) - Nutrition (VFC0001)]  
VFG048287(gb|WP\_014906962) (fimF) type 1 fimbrial minor component [Type I fimbriae (VF0566) - Adherence (VFC0001)]  
VFG002518(gb|WP\_004200262) (flgL) flagellar hook-associated protein 3 FlgL [Flagella (VF0430) - Motility (VFC0001)]  
VFG014893(gb|NP\_254009) (algC) phosphomannomutase AlgC [Alginate (VF0091) - Biofilm (VFC0271)] [Pseudomonas (VFC0001)]  
VFG045626(gb|WP\_014748741) (scm) collagen adhesin protein Scm [Scm (VF0418) - Adherence (VFC0001)] [Staphylococcus (VFC0001)]  
VFG041110(gb|NP\_459284) (STM0286) hypothetical protein [SCI (Salmonella centrisome island) (VF0974) - Effector delivery (VFC0001)]  
VFG002417(gb|WP\_001301550) (yagV/ecpE) E. coli common pilus chaperone EcpE [ECP (VF0404) - Adherence (VFC0001)]  
VFG013476(gb|WP\_032828451) (kpsF) KpsF/GutQ family sugar isomerase [LOS (VF0044) - Immune modulation (VFC0001)]  
VFG045467(gb|WP\_011204972) (cdpA) cyclic di-GMP phosphodiesterase [CdpA (VF0432) - Regulation (VFC0001)]  
VFG038753(gb|WP\_024944879) (motY) sodium-type flagellar protein MotY [Polar flagella (VF0473) - Motility (VFC0001)]  
VFG048307(gb|WP\_041937815) (fimH) type 1 fimbrial adhesin precursor [Type I fimbriae (VF0566) - Adherence (VFC0001)]  
VFG002499(gb|WP\_004197164) (fliI) flagellum-specific ATP synthase FliI [Flagella (VF0430) - Motility (VFC0001)]  
VFG049144(gb|WP\_002892069) (acrB) acriflavine resistance protein B [AcrAB (VF0568) - Antimicrobial activity (VFC0001)]  
VFG038886(gb|WP\_005314222) (lafE) LafE, flagellar hook control length protein [Lateral flagella (VF0474) - Motility (VFC0001)]  
VFG038883(gb|WP\_005314227) (lafB) flagellar hook associated protein LafB [Lateral flagella (VF0474) - Motility (VFC0001)]  
VFG038820(gb|WP\_161785096) (flgA) flagella basal body P-ring formation protein FlgA [Polar flagella (VF0473) - Motility (VFC0001)]  
VFG007832(gb|NP\_217448) (ppsB) phthiocerol synthesis polyketide synthase type I PpsB [PDIM (VF0309) - Immunomodulation (VFC0001)]  
VFG002413(gb|WP\_000389022) (ykgK/ecpR) regulator protein EcpR [ECP (VF0404) - Adherence (VFC0001)]  
VFG048247(gb|WP\_002916190) (fimA) type 1 major fimbrial subunit precursor [Type I fimbriae (VF0566) - Adherence (VFC0001)]  
VFG048779(gb|WP\_004190503) (tssG) type VI secretion system baseplate subunit TssG [T6SS (VF0569) - Effector delivery (VFC0001)]  
VFG038862(gb|WP\_011898282) (lafK) two-component system lateral flagellar response regulator [Lateral flagella (VF0474) - Motility (VFC0001)]

VFG002420(gb|WP\_000645781) (*adsA*) Adenosine synthase A [AdsA (VF0422) - Immune modulation (VFC0251)]

VFG049905(gb|WP\_000343289) (*tssL*) Type VI secretion system protein TssL [T6SS (VF0579) - Effector delivery system (VFC0001)]

VFG031564(gb|YP\_177826) (*PE\_PGRS30*) PE-PGRS family protein PE\_PGRS30 [PE/PE-PGRS (VF0316) - Immune modulation (VFC0251)]

VFG038367(gb|WP\_011705045) (*vgrG1*) Type VI secretion system effector VgrG1, ADP-ribosyltransferase [T6SS (VF0579) - Effector delivery system (VFC0001)]

VFG034636(gb|WP\_000358674) (*cfaC*) colonisation factor antigen c, usher [Adhesive fimbriae (VF0213) - Adherence (VFC0001)]

VFG038119(gb|WP\_000686134) (*ACICU\_RS00485*) nucleotide sugar dehydrogenase [Capsule (VF0465) - Immune modulation (VFC0251)]

VFG013070(gb|WP\_001626196) (*shuV*) ATP-binding component of hemin transport system [Shu (VF0256) - Nutritional/Metabolic factor (VFC0251)]

VFG004773(gb|WP\_000842036) (*lip*) triacylglycerol lipase precursor [Lipase (VF0012) - Exoenzyme (VFC0251)]

VFG038533(gb|WP\_016350152) (*flpF*) traffic ATPase [Flp type IV pili (VF0476) - Adherence (VFC0001)] [Aerobically induced (VFC0001)]

VFG033511(gb|WP\_000803678) (*sepQ/escQ*) Type III secretion system C ring protein EscQ [TTSS (VF0172) - Effector delivery system (VFC0001)]

VFG000166(gb|NP\_252916) (*pchE*) dihydroaeruginic acid synthetase PchE [Pyochelin (VF0095) - Nutritional/Metabolic factor (VFC0251)]

VFG019180(gb|WP\_011987710) (*bont*) botulinum neurotoxin, BoNT [BoNT (VF0375) - Exotoxin (VFC0235)] [Enterotoxin (VFC0235)]

VFG013418(gb|WP\_005694260) (*gmhA/lpcA*) phosphoheptose isomerase [LOS (VF0044) - Immune modulation (VFC0251)]

VFG014369(gb|NP\_249789) (*fleS*) two-component sensor [Flagella (VF0273) - Motility (VFC0204)] [Pseudomonas (VFC0204)]

VFG000027(gb|WP\_010931506) (*brkA*) serum resistance protein [Brk (VF0034) - Immune modulation (VFC0251)]

VFG041038(gb|NP\_251056) (*PA2366*) uricase [HSI-3 (VF0944) - Effector delivery system (VFC0086)] [Pseudomonas (VFC0086)]

VFG000169(gb|NP\_252919) (*pchC*) pyochelin biosynthetic protein PchC [Pyochelin (VF0095) - Nutritional/Metabolic factor (VFC0251)]

VFG002171(gb|WP\_011109430) (*EF0149*) aggregation substance [AS (VF0352) - Adherence (VFC0001)] [Enterotoxin (VFC0235)]

VFG048449(gb|WP\_012737621) (*fepB*) iron-enterobactin transporter periplasmic binding protein [Ent (VF0562) - Nutritional/Metabolic factor (VFC0251)]

VFG038383(gb|WP\_011705715) (*atsH*) Type VI secretion system protein [T6SS (VF0480) - Effector delivery system (VFC0001)]

VFG038861(gb|WP\_005314296) (*lfhA*) lateral flagellar biosynthesis protein [Lateral flagella (VF0474) - Motility (VFC0204)]

VFG001249(gb|NP\_249790) (*fleR*) two-component response regulator [Flagella (VF0273) - Motility (VFC0204)]

VFG049916(gb|WP\_000103365) (*vgrG/tssI*) type VI secretion system effector VgrG [T6SS (VF0579) - Effector delivery system (VFC0001)]

VFG038301(gb|WP\_016349342) (*exeK*) general secretion pathway protein K [Exe T2SS (VF0478) - Effector delivery system (VFC0001)]

VFG037747(gb|WP\_001984639) (*lpxM*) lysophospholipid acyltransferase family protein [LPS (VF0466) - Immune modulation (VFC0251)]

VFG041118(gb|WP\_045606108) (*tssA-5*) Type VI secretion system protein TssA [T6SS-1 (VF0429) - Effector delivery system (VFC0001)]

VFG007857(gb|NP\_217450) (*ppsD*) phthiocerol synthesis polyketide synthase type I PpsD [PDIM (VF0309) - Nutritional/Metabolic factor (VFC0251)]

VFG002076(gb|NP\_248780) (*clpV1*) type VI secretion system AAA+ family ATPase [HSI-I (VF0334) - Effector delivery system (VFC0001)]

VFG002077(gb|NP\_248781) (*vgrG1a*) type VI secretion system substrate VgrG1 [HSI-I (VF0334) - Effector delivery system (VFC0001)]

VFG044334(gb|WP\_015874979) (*iroN*) salmochelin receptor IroN [Sal (VF0563) - Nutritional/Metabolic factor (VFC0251)]

VFG039366(gb|NP\_819695) (*cvpA*) Coxiella Dot/Icm type IVB secretion system translocated effector, Coxiella [Coxiella (VF0309) - Nutritional/Metabolic factor (VFC0251)]

VFG038878(gb|WP\_005314254) (*flgI*) flagellar basal body P-ring protein [Lateral flagella (VF0474) - Motility (VFC0204)]

VFG044097(gb|NP\_252909) (*PA4219*) hypothetical protein [Pyochelin (VF0095) - Nutritional/Metabolic factor (VFC0251)]

VFG048708(gb|WP\_041168969) (*vgrG/tssI*) type VI secretion system tip protein VgrG [T6SS (VF0569) - Effector delivery system (VFC0001)]

VFG049148(gb|WP\_041168941) (*clbB*) colibactin hybrid non-ribosomal peptide synthetase/type I polyketide synthase [Colibactin (VF0474) - Nutritional/Metabolic factor (VFC0251)]

VFG038792(gb|WP\_011706640) (*flgF*) flagellar basal-body rod protein FlgF [Polar flagella (VF0473) - Motility (VFC0204)]

VFG000883(gb|WP\_001239363) (*papH*) P pilus termination subunit PapH [P fimbriae (VF0220) - Adherence (VFC0001)]

VFG046610(gb|WP\_003020688) (*rpe*) ribulose-phosphate 3-epimerase [Capsule (VF0543) - Immune modulation (VFC0251)]

VFG044322(gb|WP\_004190148) (*iroE*) siderophore esterase IroE [Sal (VF0563) - Nutritional/Metabolic factor (VFC0251)]

VFG000362(gb|WP\_002212777) (*irp1*) yersiniabactin biosynthetic protein Irp1 [Yersiniabactin (VF0136) - Nutritional/Metabolic factor (VFC0251)]

VFG038444(gb|WP\_075384315) (*tapM*) type IV pilus assembly protein PilM [Tap type IV pili (VF0475) - Adherence (VFC0001)]

VFG000157(gb|NP\_249535) (*plcH*) hemolytic phospholipase C precursor [PLC (VF0092) - Exotoxin (VFC0235)]

VFG014950(gb|NP\_249457) (*mucD*) serine protease MucD precursor [Alginate (VF0091) - Biofilm (VFC0271)]

VFG001713(gb|WP\_001298062) (*papX*) PapX protein regulates flagellum synthesis to repress motility [P fimbriae (VF0220) - Adherence (VFC0001)]

VFG001405(gb|NP\_217219) (*sigA/rpoV*) RNA polymerase sigma factor SigA [SigA (VF0257) - Regulation (VFC0251)]

VFG041043(gb|NP\_251061) (*PA2371*) ClpA/B-type protease [HSI-3 (VF0944) - Effector delivery system (VFC0086)]

VFG002178(gb|AAM75254) (*cyll*) cytolysin immunity protein [Cytolysin (VF0356) - Exotoxin (VFC0235)] [Enterobacteriaceae]

VFG038191(gb|WP\_002023245) (*abaI*) N-acyl-L-homoserine lactone synthetase [Quorum sensing (VF0471) - Bacterial communication (VFC0001)] [Enterobacteriaceae]

VFG000678(gb|AAD32426) (*cya*) calmodulin sensitive adenylate cyclase, edema factor [Anthrax toxin (VF0142) - Exotoxin (VFC0235)] [Bacillus anthracis]

VFG001261(gb|NP\_250139) (*fliR*) flagellar biosynthetic protein FliR [Flagella (VF0273) - Motility (VFC0204)] [Pseudomonas aeruginosa]

VFG038371(gb|WP\_011705707) (*vgrG2*) VgrG protein [T6SS (VF0480) - Effector delivery system (VFC0086)] [Enterobacteriaceae]

VFG001222(gb|NP\_253731) (*pilM*) type IV pilus inner membrane platform protein PilM [Type IV pili (VF0082) - Adherence (VFC0001)] [Pseudomonas aeruginosa]

VFG000924(gb|WP\_001234311) (*fepB*) ferrienterobactin ABC transporter periplasmic binding protein [Enterobacteriaceae]

VFG000877(gb|WP\_001244821) (*fimF*) FimF protein precursor [Type 1 fimbriae (VF0221) - Adherence (VFC0001)] [Enterobacteriaceae]

VFG000878(gb|WP\_000872015) (*fimG*) FimG protein precursor [Type 1 fimbriae (VF0221) - Adherence (VFC0001)] [Enterobacteriaceae]

VFG050400(gb|WP\_000347039.1) (*pilU*) PilT/PilU family type 4a pilus ATPase [TFP (VF1334) - Adherence (VFC0001)] [Enterobacteriaceae]

VFG048409(gb|WP\_086074289) (*entA*) 2,3-dihydroxybenzoate-2,3-dehydrogenase [Ent (VF0562) - Nutritional/Metabolism (VFC0001)] [Enterobacteriaceae]

VFG002126(gb|NP\_219593) (*cdsV*) Type III secretion protein CdsV [TTSS (VF0344) - Effector delivery system (VFC0001)] [Enterobacteriaceae]

VFG001827(gb|WP\_001020414) (*senB*) enterotoxin [ShET2 (VF0258) - Exotoxin (VFC0235)] [Shigella boydii]

VFG002529(gb|WP\_011205290) (*tsr*) methyl-accepting chemotaxis protein I [Flagella (VF0430) - Motility (VFC0204)] [Pseudomonas aeruginosa]

VFG012493(gb|WP\_000528123) (*cnf1*) cytotoxic necrotizing factor 1 [CNF-1 (VF0226) - Exotoxin (VFC0235)] [Enterobacteriaceae]

VFG000365(gb|WP\_002214412) (*ybtP*) yersiniabactin ABC transporter ATP-binding/permease protein YbtP [Yersinia enterocolitica]

VFG049159(gb|WP\_014907260) (*clbM*) precolibactin export MATE transporter ClbM [Colibactin (VF0573) - Exotoxin (VFC0235)] [Enterobacteriaceae]

VFG015509(gb|NP\_252901) (*phzC1*) phenazine biosynthesis protein PhzC [Pyocyanin (VF0100) - Nutritional/Metabolism (VFC0001)] [Pseudomonas aeruginosa]

VFG050164(gb|WP\_000723250) (*neuC*) UDP-N-acetylglucosamine 2-epimerase [K1 capsule (VF0239) - Invasion (VFC0001)] [Enterobacteriaceae]

VFG050742(gb|WP\_001196426.1) (*gspD*) general secretion pathway protein D [T2SS (VF1335) - Effector delivery system (VFC0001)] [Enterobacteriaceae]

VFG050163(gb|WP\_000197083) (*neuE*) polysialic acid biosynthesis protein [K1 capsule (VF0239) - Invasion (VFC0001)] [Enterobacteriaceae]

VFG002274(gb|WP\_011009584) (*plc*) phospholipase C [Alpha-toxin (CpPLC) (VF0378) - Exotoxin (VFC0235)] [Enterobacteriaceae]

VFG038699(gb|WP\_010634617) (*cheY*) chemotaxis protein CheY [Polar flagella (VF0473) - Motility (VFC0204)] [Pseudomonas aeruginosa]

VFG038687(gb|WP\_016350057) (*flhF*) flagellar biosynthesis protein FlhF [Polar flagella (VF0473) - Motility (VFC0204)] [Pseudomonas aeruginosa]

VFG001254(gb|NP\_249795) (*fliI*) flagellum-specific ATP synthase FliI [Flagella (VF0273) - Motility (VFC0204)] [Pseudomonas aeruginosa]

VFG002187(gb|WP\_002370472) (*cpsD*) glycosyl transferase, group 2 family protein [Capsule (VF0361) - Immune modulation (VFC0001)] [Enterobacteriaceae]

VFG038369(gb|WP\_011705706) (*hcp*) hemolysin co-regulated protein [T6SS (VF0480) - Effector delivery system (VFC0086)] [Enterobacteriaceae]

VFG000919(gb|WP\_001095619) (*chuW*) Putative oxygen independent coproporphyrinogen III oxidase [Chu (VF0361) - Immune modulation (VFC0001)] [Enterobacteriaceae]

VFG049029(gb|WP\_014907241) (KP1\_RS17220) glycosyltransferase [LPS (VF0561) - Immune modulation (VFC0001)] [Enterobacteriaceae]

VFG034648(gb|WP\_001245988) (*cfaD/cfaE*) minor pilin and initiator [Adhesive fimbriae (VF0213) - Adherence (VFC0001)] [Enterobacteriaceae]

VFG002450(gb|WP\_004533397) (*bipB*) Type III secretion system translocator protein BipB [Bsa T3SS (VF0428) - Effector delivery system (VFC0001)] [Enterobacteriaceae]

VFG038281(gb|WP\_016349337) (*exeF*) general secretion pathway protein F [Exe T2SS (VF0478) - Effector delivery system (VFC0001)] [Enterobacteriaceae]

VFG002174(gb|WP\_002369251) (*gelE*) coccolysin [Gelatinase (VF0357) - Exoenzyme (VFC0251)] [Enterococcus faecalis]

VFG050161(gb|WP\_000579525) (*kpsC*) Capsule polysaccharide export protein [K1 capsule (VF0239) - Invasion (VFC0001)] [Enterobacteriaceae]

VFG038417(gb|WP\_016349294) (*fimD*) fimbrial chaperone protein [Type I pili (VF0486) - Adherence (VFC0001)] [Enterobacteriaceae]

VFG048478(gb|WP\_004147521) (*fepG*) iron-enterobactin transporter permease [Ent (VF0562) - Nutritional/Metabolism (VFC0001)] [Enterobacteriaceae]

VFG002507(gb|WP\_004534277) (*flgA*) flagellar basal body P-ring biosynthesis protein FlgA [Flagella (VF0430) - Motility (VFC0204)] [Pseudomonas aeruginosa]

VFG000845(gb|WP\_000581721) (*toxB*) cytotoxin [ToxB (VF0203) - Effector delivery system (VFC0086)] [Escherichia coli]

VFG014707(gb|NP\_250151) (*motC*) flagellar motor protein [Flagella (VF0273) - Motility (VFC0204)] [Pseudomonas aeruginosa]

VFG038723(gb|WP\_011705294) (AHML\_RS07540) CobQ/CobB/MinD/ParA family protein [Polar flagella (VF0473) - Motility (VFC0204)] [Pseudomonas aeruginosa]

VFG038468(gb|WP\_016351972) (*tapU*) twitching ATPase [Tap type IV pili (VF0475) - Adherence (VFC0001)] [Pseudomonas aeruginosa]

VFG039216(gb|NP\_820634) (*icmX*) Type IVB secretion system protein IcmX [Dot/Icm T4SS (VF0503) - Effector delivery system (VFC0001)] [Enterobacteriaceae]

VFG049051(gb|WP\_014907239) (KP1\_RS17230) glycosyltransferase [LPS (VF0561) - Immune modulation (VFC0001)] [Enterobacteriaceae]

VFG038373(gb|WP\_011705708) (*atsA*) Type VI secretion system protein [T6SS (VF0480) - Effector delivery system (VFC0086)] [Enterobacteriaceae]

VFG038836(gb|WP\_011707085) (*pomA2*) chemotaxis protein PomA [Polar flagella (VF0473) - Motility (VFC0204)] [Pseudomonas aeruginosa]

VFG002547(gb|WP\_004527661) (*wcbS*) UDP-3-O-[3-hydroxymyristoyl] N-acetylglucosamine deacetylase [Capsule (VF0361) - Immune modulation (VFC0001)] [Enterobacteriaceae]

VFG049161(gb|WP\_001029878) (clbO) colibactin polyketide synthase ClbO [Colibactin (VF0573) - Exotoxin (VF0573)] [Escherichia coli (VF0221)]

VFG048643(gb|WP\_014907727) (vipB/tssC) type VI secretion system contractile sheath large subunit VipB [T6SS (VF0573) - Exotoxin (VF0573)] [Escherichia coli (VF0221)]

VFG000872(gb|WP\_000044711) (fimE) Type 1 fimbriae Regulatory protein fimE [Type 1 fimbriae (VF0221) - Adherence (VFC0001)] [Escherichia coli (VF0221)]

VFG000928(gb|WP\_000640938) (fepG) iron-enterobactin ABC transporter permease [Enterobactin (VF0228) - Nutritional/Metabolic (VF0228)] [Escherichia coli (VF0228)]

VFG038882(gb|WP\_005314247) (maf-5) modification accessory factor [Lateral flagella (VF0474) - Motility (VFC0204)] [Pseudomonas aeruginosa (VF0474)]

VFG045313(gb|WP\_010946503) (LPG\_RS03795) hypothetical protein [LPS (VF0171) - Immune modulation (VFC0258)] [Haemophilus influenzae (VF0171)]

VFG000906(gb|WP\_001142375) (hlyA) Hemolysin A [-Hemolysin (VF0225) - Exotoxin (VFC0235)] [Escherichia coli (VF0225)]

VFG038715(gb|WP\_024943899) (motA) chemotaxis protein MotA [Polar flagella (VF0473) - Motility (VFC0204)] [Pseudomonas aeruginosa (VF0473)]

VFG038772(gb|WP\_016351319) (flgK) flagellar hook-associated protein FlgK [Polar flagella (VF0473) - Motility (VFC0204)] [Pseudomonas aeruginosa (VF0473)]

VFG001855(gb|WP\_197535493) (htpB) Hsp60, 60K heat shock protein HtpB [Hsp60 (VF0159) - Adherence (VFC0001)] [Escherichia coli (VF0159)]

VFG048229(gb|WP\_015875142) (fimB) tyrosine recombinase [Type I fimbriae (VF0566) - Adherence (VFC0001)] [Escherichia coli (VF0566)]

VFG034576(gb|WP\_049794100) (aafC) aggregative adherence fimbria II usher protein AafC [AAFs (VF0214) - Adherence (VFC0001)] [Escherichia coli (VF0214)]

VFG041316(gb|WP\_010947871) (lpg2160) Dot/Icm type IV secretion system effector [Dot/Icm T4SS secreted effectors (VF0171) - Effector delivery system (VFC0001)] [Haemophilus influenzae (VF0171)]

VFG041041(gb|NP\_251059) (PA2369) hypothetical protein [HSI-3 (VF0944) - Effector delivery system (VFC0001)] [Pseudomonas aeruginosa (VF0944)]

VFG038545(gb|WP\_043118798) (flpC) Flp pilus secretin FlpC [Flp type IV pili (VF0476) - Adherence (VFC0001)] [Escherichia coli (VF0476)]

VFG041011(gb|NP\_248785) (vgrG1b) type VI secretion system substrate VgrG1b [HSI-I (VF0334) - Effector delivery system (VFC0001)] [Pseudomonas aeruginosa (VF0334)]

VFG042738(gb|NP\_253646) (fimX) protein FimX [Type IV pili (VF0082) - Adherence (VFC0001)] [Pseudomonas aeruginosa (VF0082)]

VFG049909(gb|WP\_001113715) (fha) Type VI secretion system protein Fha [T6SS (VF0579) - Effector delivery system (VFC0001)] [Escherichia coli (VF0579)]

VFG038261(gb|WP\_016352107) (exeA) general secretion pathway protein A [Exe T2SS (VF0478) - Effector delivery system (VFC0001)] [Escherichia coli (VF0478)]

VFG002067(gb|NP\_248771) (fha1) type VI secretion system forkhead-associated protein Fha1 [HSI-I (VF0334) - Effector delivery system (VFC0001)] [Pseudomonas aeruginosa (VF0334)]

VFG001445(gb|AAA92657) (AAA92657) unknown protein [TraJ (VF0241) - Invasion (VFC0083)] [Escherichia coli (VF0241)]

VFG002053(gb|WP\_001250462) (gspJ) general secretion pathway protein J [T2SS (VF0333) - Effector delivery system (VFC0001)] [Escherichia coli (VF0333)]

VFG042979(gb|WP\_002379311) (srtC) sortase [Ebp pili (VF0538) - Adherence (VFC0001)] [Enterococcus faecalis (VF0538)]

VFG001968(gb|YP\_002344823) (Cj1440c) sugar transferase [Capsule (VF0323) - Immune modulation (VFC0258)] [Haemophilus influenzae (VF0323)]

VFG038851(gb|WP\_016350359) (nueB) pseudaminic acid synthase, NeuB [Polar flagella (VF0473) - Motility (VFC0204)] [Pseudomonas aeruginosa (VF0473)]

VFG000367(gb|WP\_001286280) (ybtX) putative signal transducer [Yersiniabactin (VF0136) - Nutritional/Metabolic (VF0136)] [Yersinia enterocolitica (VF0136)]

VFG045349(gb|WP\_000092542) (fdeC) adhesin FdeC [FdeC (VF0506) - Adherence (VFC0001)] [Escherichia coli (VF0506)]

VFG038277(gb|WP\_016349336) (exeE) general secretory pathway protein E [Exe T2SS (VF0478) - Effector delivery system (VFC0001)] [Escherichia coli (VF0478)]

VFG007904(gb|NP\_217452) (ddrA) daunorubicin ABC transporter ATP-binding protein DrrA [PDIM (VF0309) - Adherence (VFC0001)] [Pseudomonas aeruginosa (VF0309)]

VFG038647(gb|WP\_016350053) (fliK) flagellar hook-length control protein FliK [Polar flagella (VF0473) - Motility (VFC0204)] [Pseudomonas aeruginosa (VF0473)]

VFG002179(gb|AAD09858) (esp) Enterococcal surface protein; Esp [Esp (VF0353) - Adherence (VFC0001)] [Enterococcus faecalis (VF0353)]

VFG022082(gb|YP\_177711) (PPE4) PPE family protein [ESX-3 (VF0521) - Effector delivery system (VFC0086)] [Mycobacterium tuberculosis (VF0521)]

VFG049154(gb|WP\_014907257) (clbH) colibactin non-ribosomal peptide synthetase ClbH [Colibactin (VF0573) - Exotoxin (VF0573)] [Escherichia coli (VF0573)]

VFG000326(gb|WP\_105163169) (licA) choline kinase [LOS (VF0044) - Immune modulation (VFC0258)] [Haemophilus influenzae (VF0044)]

VFG042977(gb|WP\_002379309) (ebpB) endocarditis and biofilm-associated pilus minor subunit EbpB [Ebp pili (VF0538) - Adherence (VFC0001)] [Enterococcus faecalis (VF0538)]

VFG038711(gb|WP\_016350060) (cheB-2) chemotaxis-specific methylesterase [Polar flagella (VF0473) - Motility (VFC0204)] [Pseudomonas aeruginosa (VF0473)]

VFG000186(gb|NP\_250382) (pscT) type III secretion system protein PscT [TTSS (VF0083) - Effector delivery system (VFC0001)] [Pseudomonas aeruginosa (VF0083)]

VFG046955(gb|WP\_003021532) (lpcC) glycosyl transferase family protein [LPS (VF0542) - Immune modulation (VFC0258)] [Haemophilus influenzae (VF0542)]

VFG043623(gb|WP\_002916122) (mrkF) type 3 fimbrial minor pilin subunit MrkF [Type 3 fimbriae (VF0567) - Adherence (VFC0001)] [Escherichia coli (VF0567)]

VFG043018(gb|NP\_252039) (PA3349) chemotaxis protein [Flagella (VF0273) - Motility (VFC0204)] [Pseudomonas aeruginosa (VF0273)]

VFG022035(gb|NP\_214797) (eccB3) Type VII secretion system protein EccB3 [ESX-3 (VF0521) - Effector delivery system (VFC0086)] [Mycobacterium tuberculosis (VF0521)]

VFG038289(gb|WP\_016349339) (exeH) general secretion pathway protein H [Exe T2SS (VF0478) - Effector delivery system (VFC0001)] [Escherichia coli (VF0478)]

VFG000927(gb|WP\_000096764) (fepE) LPS O-antigen length regulator [Enterobactin (VF0228) - Nutritional/Metabolic (VF0228)] [Escherichia coli (VF0228)]

VFG000175(gb|NP\_251786) (xcpY) general secretion pathway protein L [Xcp secretion system (VF0084) - Effector delivery system (VFC0001)] [Pseudomonas aeruginosa (VF0084)]

VFG000160(gb|NP\_251087) (pvdE) pyoverdine biosynthesis protein PvdE [Pyoverdine (VF0094) - Nutritional/Metabolic (VF0094)] [Pseudomonas aeruginosa (VF0094)]

VFG050457(gb|WP\_001274990.1) (pilB) type IV-A pilus assembly ATPase PilB [TFP (VF1334) - Adherence (VFC0001)] [Pseudomonas aeruginosa (VF1334)]

VFG049122(gb|WP\_012737539) (allC) allantoate amidohydrolase [Allantion utilization (VF0572) - Nutritional/Metabolic factor (VFC0272)] [Escherichia coli (VF0094)]

VFG002463(gb|WP\_011205639) (bsaO) Type III secretion system protein BsaO [Bsa T3SS (VF0428) - Effector delivery system (VFC008)] [Yersinia enterocolitica (VF0094)]

VFG038784(gb|WP\_011706638) (flgH) flagellar basal body L-ring protein [Polar flagella (VF0473) - Motility (VFC020)] [Yersinia enterocolitica (VF0094)]

VFG000163(gb|NP\_251088) (fpvA) ferripyoverdine receptor FpvA [Pyoverdine (VF0094) - Nutritional/Metabolic factor (VFC0272)] [Escherichia coli (VF0094)]

VFG016038(gb|NP\_251090) (pvdJ) pyoverdine biosynthesis protein PvdJ [Pyoverdine (VF0094) - Nutritional/Metabolic factor (VFC0272)] [Escherichia coli (VF0094)]

VFG050610(gb|WP\_000477147.1) (fimT) GspH/FimT family pseudopilin [TFP (VF1334) - Adherence (VFC000)] [Yersinia enterocolitica (VF0094)]

VFG038873(gb|WP\_005314270) (flgC) flagellar basal body rod protein FlgC [Lateral flagella (VF0474) - Motility (VFC020)] [Yersinia enterocolitica (VF0094)]

VFG000909(gb|WP\_000768217) (focA) F1C major fimbrial subunit precursor [F1C fimbriae (VF0224) - Adherence (VFC000)] [Yersinia enterocolitica (VF0094)]

VFG000921(gb|WP\_000189356) (chuY) ChuY [Chu (VF0227) - Nutritional/Metabolic factor (VFC0272)] [Escherichia coli (VF0094)]

VFG038525(gb|WP\_043118801) (flpH) Flp pilus assembly protein FlpH [Flp type IV pili (VF0476) - Adherence (VFC000)] [Yersinia enterocolitica (VF0094)]

VFG010749(gb|WP\_010945896) (sdhB) Dot/Icm type IV secretion system effector SdhB [Dot/Icm T4SS secreted effectors (VF0579) - Effector delivery system (VFC008)] [Yersinia enterocolitica (VF0094)]

VFG002415(gb|WP\_001131063) (yagX/ecpC) E. coli common pilus usher EcpC [ECP (VF0404) - Adherence (VFC000)] [Yersinia enterocolitica (VF0094)]

VFG000182(gb|NP\_251793) (xcpR) general secretion pathway protein E [Xcp secretion system (VF0084) - Effector delivery system (VFC008)] [Yersinia enterocolitica (VF0094)]

VFG038780(gb|WP\_011706637) (flgI) flagellar basal body P-ring protein [Polar flagella (VF0473) - Motility (VFC020)] [Yersinia enterocolitica (VF0094)]

VFG002382(gb|NP\_218387) (eccCa1) ESX-1 type VII secretion system FtsK/SpoIIIE family protein EccCa1 [ESX-1 type VII secretion system (VF0572) - Nutritional/Metabolic factor (VFC0272)] [Mycobacterium tuberculosis (VF0094)]

VFG000917(gb|WP\_000089583) (chuA) Outer membrane heme/hemoglobin receptor ChuA [Chu (VF0227) - Nutritional/Metabolic factor (VFC0272)] [Escherichia coli (VF0094)]

VFG049904 (clpV/tssH) Type VI secretion system ATPase ClpV/TssH [T6SS (VF0579) - Effector delivery system (VFC008)] [Yersinia enterocolitica (VF0094)]

VFG002536(gb|WP\_004530401) (fliD) flagellar capping protein FliD [Flagella (VF0430) - Motility (VFC020)] [Yersinia enterocolitica (VF0094)]

VFG049018(gb|WP\_002913007) (rcsB) transcriptional regulator RcsB [RcsAB (VF0571) - Regulation (VFC030)] [Yersinia enterocolitica (VF0094)]

VFG049040(gb|WP\_074160401) (KP1\_RS17225) glycosyltransferase family 4 protein [LPS (VF0561) - Immune system (VFC027)] [Klebsiella pneumoniae (VF0094)]

VFG002064(gb|NP\_248768) (dotU1) type VI secretion system protein DotU [HSI-I (VF0334) - Effector delivery system (VFC008)] [Yersinia enterocolitica (VF0094)]

VFG033788(gb|WP\_001025657) (nleA/espI) Type III secretion system effector NleA [TTSS secreted effectors (VF0579) - Effector delivery system (VFC008)] [Yersinia enterocolitica (VF0094)]

VFG034908(gb|WP\_000978349) (espY3) Type III secretion system effector EspY3 [TTSS secreted effectors (VF0579) - Effector delivery system (VFC008)] [Yersinia enterocolitica (VF0094)]

VFG002176(gb|AAM75252) (cylB) ABC-type transporter [Cytolysin (VF0356) - Exotoxin (VFC0235)] [Enterococcus faecalis (VF0094)]

VFG000617(gb|NP\_709456) (iucC) aerobactin synthesis protein IucC [Aerobactin (VF0123) - Nutritional/Metabolic factor (VFC0272)] [Escherichia coli (VF0094)]

VFG049116(gb|WP\_012737528) (allA) ureidoglycolate hydrolase [Allantion utilization (VF0572) - Nutritional/Metabolic factor (VFC0272)] [Escherichia coli (VF0094)]

VFG001240(gb|NP\_249773) (flgG) flagellar basal-body rod protein FlgG [Flagella (VF0273) - Motility (VFC020)] [Yersinia enterocolitica (VF0094)]

VFG049152(gb|WP\_000337350) (clbF) colibactin biosynthesis dehydrogenase ClbF [Colibactin (VF0573) - Exotoxin (VFC0235)] [Yersinia enterocolitica (VF0094)]

VFG048348(gb|WP\_004149658) (mrkJ) phosphodiesterase [Type 3 fimbriae (VF0567) - Biofilm (VFC0271)] [Klebsiella pneumoniae (VF0094)]

VFG038413(gb|WP\_043118350) (fimC) outer membrane usher protein [Type I pili (VF0486) - Adherence (VFC000)] [Yersinia enterocolitica (VF0094)]

VFG049906 (tssK) Type VI secretion system protein TssK [T6SS (VF0579) - Effector delivery system (VFC008)] [Yersinia enterocolitica (VF0094)]

VFG043346(gb|WP\_010947489) (fleS/flrB) flagellar sensor histidine kinase FleS [Flagella (VF0157) - Motility (VFC020)] [Yersinia enterocolitica (VF0094)]

VFG038760(gb|WP\_016351312) (flrB) two-component sensor kinase [Polar flagella (VF0473) - Motility (VFC020)] [Yersinia enterocolitica (VF0094)]

VFG049898(gb|WP\_001284199) (hcp1/tssD1) type VI secretion system protein, Hcp family [T6SS (VF0579) - Effector delivery system (VFC008)] [Yersinia enterocolitica (VF0094)]

VFG001218(gb|NP\_253727) (pilQ) type 4 fimbrial biogenesis protein PilQ [Type IV pili (VF0082) - Adherence (VFC000)] [Yersinia enterocolitica (VF0094)]

VFG001278(gb|WP\_000069296) (ebp) cell surface elastin binding protein [EbpS (VF0008) - Adherence (VFC000)] [Yersinia enterocolitica (VF0094)]

VFG002279(gb|WP\_003467250) (nagJ) hyaluronidase [Mu-toxin (VF0389) - Exoenzyme (VFC0251)] [Clostridium perfringens (VF0094)]

VFG046118(gb|WP\_011205945) (mhp107) P97 paralog, surface adhesin [P97/P102 paralog family (VF0426) - Adherence (VFC000)] [Yersinia enterocolitica (VF0094)]

VFG002095(gb|WP\_010947666) (ralF) Dot/Icm type IV secretion system effector guanine nucleotide exchange protein [Dot/Icm T4SS secreted effectors (VF0579) - Effector delivery system (VFC008)] [Yersinia enterocolitica (VF0094)]

VFG049158(gb|WP\_001297937) (clbL) colibactin biosynthesis amidase ClbL [Colibactin (VF0573) - Exotoxin (VFC0235)] [Yersinia enterocolitica (VF0094)]

VFG038425(gb|WP\_016349296) (fimF) fimbrial protein [Type I pili (VF0486) - Adherence (VFC0001)] [Aeromonas hydrophila (VF0094)]

VFG045298(gb|WP\_010946487) (hisH) imidazole glycerol phosphate synthase subunit HisH [LPS (VF0171) - Immune system (VFC027)] [Yersinia enterocolitica (VF0094)]

VFG001814(gb|NP\_215678) (narH) nitrate reductase subunit beta [Nitrate reductase (VF0302) - Nutritional/Metabolic factor (VFC0272)] [Escherichia coli (VF0094)]

VFG038832(gb|WP\_016351724) (pomB2) flagellar motor protein MotB [Polar flagella (VF0473) - Motility (VFC020)] [Yersinia enterocolitica (VF0094)]

VFG014984(gb|NP\_253136) (algW) AlgW protein [Alginate (VF0091) - Biofilm (VFC0271)] [Pseudomonas aeruginosa (VF0094)]

VFG043627(gb|WP\_000756959) (mrkA) type 3 fimbrial major pilin subunit MrkA [Type 3 fimbriae (VF0567) - Biofilm (VFC0271)] [Klebsiella pneumoniae (VF0094)]

VFG000862(gb|WP\_014639426) (pet) Pet serine protease precursor, autotransporter [Pet (VF0217) - Effector del  
VFG048297(gb|WP\_014906961) (fimG) type 1 fimbrial minor component [Type I fimbriae (VF0566) - Adheren  
VFG041027(gb|NP\_250360) (PA1669) hypothetical protein [HSI-2 (VF0943) - Effector delivery system (VFC00  
VFG012509(gb|WP\_001111200) (iroC) ATP binding cassette transporter [Salmochelid siderophore (VF0230) - N  
VFG040665(gb|WP\_011190939) (sca4) cell surface antigen Sca4 [Sca4 (VF0502) - Others (VFC0346)] [Ricketts  
VFG033484(gb|WP\_000953248) (escD) Type III secretion system outer MS ring protein EscD [TTSS (VF0172)  
VFG038497(gb|WP\_016351992) (tppF) type IV pilus pseudopilin [Tap type IV pili (VF0475) - Adherence (VFC  
VFG006217 (opa) outer membrane beta-barrel protein [Opa (VF0076) - Invasion (VFC0083)] [Neisseria mening  
VFG038913 (rtxA) multifunctional autoprocessing repeats-in-toxins (MARTX) toxin [RtxA (VF0482) - Exotoxin  
VFG000932(gb|WP\_000026784) (entE) 2,3-dihydroxybenzoate-AMP ligase component of enterobactin synthase  
VFG001917(gb|YP\_002344286) (flgL) flagellar hook-associated protein FlgL [Flagella (VF0114) - Motility (VF  
VFG002548(gb|WP\_004550042) (wcbR) capsular polysaccharide biosynthesis fatty acid synthase [Capsule I (VF  
VFG038381(gb|WP\_011705714) (atsG) Type VI secretion system protein [T6SS (VF0480) - Effector delivery sy  
VFG048317(gb|WP\_014906959) (fimK) transcriptional regulator [Type I fimbriae (VF0566) - Adherence (VFC0  
VFG002122(gb|WP\_115801843) (nleC) Type III secretion system effector NleC, zinc metalloprotease [TTSS se  
VFG001251(gb|NP\_249792) (fliF) flagellar M-ring protein FliF [Flagella (VF0273) - Motility (VFC0204)] [Pseu  
VFG002480(gb|WP\_011205629) (tssH-5/clpV) Clp-type ATPase chaperone protein [T6SS-1 (VF0429) - Effector  
VFG038397(gb|WP\_011705722) (vasH) sigma-54 dependent transcriptional regulator [T6SS (VF0480) - Effector  
VFG000199(gb|NP\_250395) (pcrR) type III secretion system regulatory protein PcrR [TTSS (VF0083) - Effector  
VFG001966(gb|YP\_002344821) (Cj1438c) sugar transferase [Capsule (VF0323) - Immune modulation (VFC025  
VFG000429(gb|WP\_010989299) (tviD) Vi polysaccharide biosynthesis protein TviD [Vi antigen (VF0101) - Imn  
VFG000064(gb|WP\_010930831) (bcrD) Type III secretion system LcrD homolog protein BcrD [TTSS (VF0035)  
VFG034866(gb|WP\_000900547) (espX4) Type III secretion system effector EspX4 [TTSS secreted effectors (VF  
VFG038874(gb|WP\_005314263) (flgE) flagellar hook protein FlgE [Lateral flagella (VF0474) - Motility (VFC02  
VFG000933(gb|WP\_001007140) (entB) isochorismatase [Enterobactin (VF0228) - Nutritional/Metabolic factor (  
VFG000861(gb|WP\_001045649) (pic) Pic serine protease precursor, autotransporter [Pic (VF0218) - Effector del  
VFG050159(gb|WP\_001331697) (kpsD) Polysialic acid transport protein precursor [K1 capsule (VF0239) - Invas  
VFG038607(gb|WP\_016349154) (mshJ) MSHA (mannose-sensitive hemagglutinin) pili biogenesis protein MshJ  
VFG043518(gb|AAN12397) (acm) collagen adhesin precursor Acn [Acn (VF0419) - Adherence (VFC0001)] [E  
VFG049062(gb|WP\_015875020) (rfbD) UDP-galactopyranose mutase [LPS (VF0561) - Immune modulation (VF  
VFG000025(gb|WP\_010929995) (cyaA) bifunctional hemolysin-adenylate cyclase precursor [Cya (VF0028) - Ex  
VFG038505(gb|WP\_011705643) (tapF) type IV pilus biogenesis/stability protein, pilW-like [Tap type IV pili (VF  
VFG000203(gb|NP\_250399) (popB) type III secretion system hydrophobic translocator, pore protein PopB [TTS  
VFG001262(gb|NP\_250140) (flhB) flagellar biosynthetic protein FlhB [Flagella (VF0273) - Motility (VFC0204)  
VFG038856(gb|WP\_005314315) (lfiN) lateral flagellar motor switch protein, lfiN [Lateral flagella (VF0474) - M  
VFG044330(gb|WP\_032447695) (ybtU) yersiniabactin biosynthesis oxidoreductase YbtU [Ybt (VF0564) - Nutri  
VFG002493(gb|WP\_045606430) (fliO) flagellar protein FliO [Flagella (VF0430) - Motility (VFC0204)] [Burkho  
VFG012505(gb|WP\_000933673) (iroD) esterase [Salmochelid siderophore (VF0230) - Nutritional/Metabolic fact  
VFG009561(gb|YP\_177877) (mbtI) Isochorismate synthase MbtI [Mycobactin (VF0299) - Nutritional/Metabolic  
VFG044331(gb|WP\_015874966) (ybtT) type II thioesterase YbtT [Ybt (VF0564) - Nutritional/Metabolic factor (  
VFG012591(gb|WP\_001017167) (chuS) heme oxygenase ChuS [Chu (VF0234) - Nutritional/Metabolic factor (V  
VFG039506 (coxCC8) Coxiella Dot/Icm type IVB secretion system translocated effector [T4SS secreted effector  
VFG038391(gb|WP\_011705719) (atsL) Type VI secretion system protein [T6SS (VF0480) - Effector delivery sy  
VFG000038(gb|WP\_003807115) (bplA) probable oxidoreductase [LPS (VF0033) - Immune modulation (VFC02  
VFG038561(gb|WP\_016349168) (mshQ) MSHA (mannose-sensitive hemagglutinin) pili biogenesis protein Msh  
VFG045389 (APH\_RS05905\*) P44/Msp2 family outer membrane protein [P44/Msp2 family (VF0520) - Immune

VFG038731(gb|WP\_016350347) (flaA) flagellin [Polar flagella (VF0473) - Motility (VFC0204)] [Aeromonas hydrophila (VF0473) - Motility (VFC0204)]

VFG038796(gb|WP\_016351321) (flgE) flagellar hook protein FlgE [Polar flagella (VF0473) - Motility (VFC0204)] [Aeromonas hydrophila (VF0473) - Motility (VFC0204)]

VFG034897(gb|WP\_013009101) (espY1) Type III secretion system effector EspY1 [TTSS secreted effectors (VF000000) - Secretion (VFC0000)] [Escherichia coli O157:H7 (VF0189) - Secretion (VFC0301)]

VFG001444(gb|AAG10151) (aslA) putative arylsulfatase [AslA (VF0238) - Invasion (VFC0083)] [Escherichia coli O157:H7 (VF0189) - Invasion (VFC0083)]

VFG038845(gb|WP\_016351249) (nueA) NeuA protein [Polar flagella (VF0473) - Motility (VFC0204)] [Aeromonas hydrophila (VF0473) - Motility (VFC0204)]

VFG041292(gb|WP\_010947444) (lpg1717) Dot/Icm type IV secretion system effector [Dot/Icm T4SS secreted effectors (VF000000) - Secretion (VFC0000)] [Pseudomonas aeruginosa (VF0273) - Secretion (VFC0000)]

VFG000935(gb|WP\_001222189) (iroN) salmochelin receptor IroN [Salmochelin siderophore (VF0230) - Nutrition (VFC0000)] [Escherichia coli O157:H7 (VF0189) - Nutrition (VFC0000)]

VFG050167(gb|WP\_000038461) (neuD) NeuD protein involved in sialic acid synthesis [K1 capsule (VF0239) - Invasion (VFC0083)] [Escherichia coli O157:H7 (VF0189) - Invasion (VFC0083)]

VFG045474(gb|AAM75251) (cylM) CylM; cytolysin subunit modifier [Cytolysin (VF0356) - Exotoxin (VFC0230)] [Escherichia coli O157:H7 (VF0189) - Exotoxin (VFC0230)]

VFG000902(gb|WP\_001034089) (sat) Acreted auto transpoter toxin [Sat (VF0231) - Effector delivery system (VFC0083)] [Escherichia coli O157:H7 (VF0189) - Effector delivery system (VFC0083)]

VFG041013(gb|NP\_250203) (hcpA) secreted protein Hcp [HSI-2 (VF0943) - Effector delivery system (VFC0083)] [Pseudomonas aeruginosa (VF0273) - Effector delivery system (VFC0083)]

VFG042975 (srtG2) surface protein cell wall anchor, sortase\_B family [PI-2 (VF0530) - Adherence (VFC0001)] [Pseudomonas aeruginosa (VF0273) - Adherence (VFC0001)]

VFG042861(gb|WP\_011213223) (pilY1) type IV pilus biogenesis PilY1-related protein [Type IV pili (VF0155) - Adherence (VFC0001)] [Pseudomonas aeruginosa (VF0273) - Adherence (VFC0001)]

VFG000929(gb|WP\_001375021) (entD) phosphopantetheinyl transferase component of enterobactin synthase mu [Enterobactin (VF0230) - Nutrition (VFC0000)] [Escherichia coli O157:H7 (VF0189) - Nutrition (VFC0000)]

VFG038452(gb|WP\_016351631) (tapO) type IV pilus biogenesis protein PilO [Tap type IV pili (VF0475) - Adherence (VFC0001)] [Pseudomonas aeruginosa (VF0273) - Adherence (VFC0001)]

VFG001289(gb|WP\_001056172) (clfA) Clumping factor A, fibrinogen-binding protein [Clumping factor (VF0000) - Adherence (VFC0001)] [Staphylococcus aureus (VF0273) - Adherence (VFC0001)]

VFG038776(gb|WP\_016351320) (flgJ) flagellar rod assembly protein/muramidase FlgJ [Polar flagella (VF0473) - Motility (VFC0204)] [Aeromonas hydrophila (VF0473) - Motility (VFC0204)]

VFG014117(gb|NP\_251831) (wbpM) nucleotide sugar epimerase/dehydratase WbpM [LPS (VF0085) - Immune response (VFC0000)] [Escherichia coli O157:H7 (VF0189) - Immune response (VFC0000)]

VFG001391(gb|NP\_215677) (narG) nitrate reductase subunit alpha [Nitrate reductase (VF0302) - Nutritional/Metabolic factor (VFC0000)] [Escherichia coli O157:H7 (VF0189) - Nutritional/Metabolic factor (VFC0000)]

VFG000161(gb|NP\_251089) (pvdD) pyoverdine synthetase D [Pyoverdine (VF0094) - Nutritional/Metabolic factor (VFC0000)] [Pseudomonas aeruginosa (VF0273) - Nutritional/Metabolic factor (VFC0000)]

VFG038619(gb|WP\_016349413) (motX) sodium-type flagellar motor component [Polar flagella (VF0473) - Motility (VFC0204)] [Aeromonas hydrophila (VF0473) - Motility (VFC0204)]

VFG050294(gb|NP\_248789) (tse7) type VI secretion exported 7, a DNase and PAAR protein [HSI-I T6SS secreted effectors (VF0579) - Secretion (VFC0000)] [Pseudomonas aeruginosa (VF0273) - Secretion (VFC0000)]

VFG045788(gb|WP\_001189322) (cgsG) curli production assembly/transport protein CsgG [Curli fibers (VF1138) - Adherence (VFC0001)] [Pseudomonas aeruginosa (VF0273) - Adherence (VFC0001)]

VFG038581(gb|WP\_043118279) (mshB) MSHA (mannose-sensitive hemagglutinin) pili minor prepilin protein M [Pili minor prepilin protein M (VF0000) - Adherence (VFC0001)] [Neisseria meningitidis (VF0000) - Adherence (VFC0001)]

VFG000358(gb|WP\_002212885) (fyuA/psn) pesticin/yersiniabactin receptor protein [Yersiniabactin (VF0136) - Secretion (VFC0000)] [Yersinia enterocolitica (VF0136) - Secretion (VFC0000)]

VFG042734(gb|NP\_249343) (vfr) cAMP-regulatory protein [Type IV pili (VF0082) - Adherence (VFC0001)] [Pseudomonas aeruginosa (VF0273) - Adherence (VFC0001)]

VFG012603(gb|WP\_001302516) (chuT) periplasmic heme-binding protein ChuT [Chu (VF0234) - Nutritional/Metabolic factor (VFC0000)] [Pseudomonas aeruginosa (VF0273) - Nutritional/Metabolic factor (VFC0000)]

VFG001258(gb|NP\_250136) (fliO) flagellar protein FliO [Flagella (VF0273) - Motility (VFC0204)] [Pseudomonas aeruginosa (VF0273) - Motility (VFC0204)]

VFG000710(gb|AAC38364) (AAC38364) Orf1 [Ler (VF0189) - Regulation (VFC0301)] [Escherichia coli O127:H7 (VF0189) - Regulation (VFC0301)]

VFG000167(gb|NP\_252917) (pchR) transcriptional regulator PchR [Pyochelin (VF0095) - Nutritional/Metabolic factor (VFC0000)] [Pseudomonas aeruginosa (VF0273) - Nutritional/Metabolic factor (VFC0000)]

VFG002164(gb|WP\_002395058) (prgB/asc10) aggregation substance PrgB/Asc10 [AS (VF0352) - Adherence (VFC0001)] [Pseudomonas aeruginosa (VF0273) - Adherence (VFC0001)]

VFG050168(gb|WP\_000590258) (kpsT) Polysialic acid transport ATP-binding protein [K1 capsule (VF0239) - Invasion (VFC0083)] [Escherichia coli O157:H7 (VF0189) - Invasion (VFC0083)]

VFG010455(gb|WP\_015444381) (pilE/pilA) type IV pilus assembly protein, major pilin [Type IV pili (VF0155) - Adherence (VFC0001)] [Pseudomonas aeruginosa (VF0273) - Adherence (VFC0001)]

VFG002060(gb|NP\_248764) (ppkA) serine/threonine protein kinase PpkA [HSI-I (VF0334) - Effector delivery system (VFC0083)] [Pseudomonas aeruginosa (VF0273) - Effector delivery system (VFC0083)]

VFG002414(gb|WP\_000730972) (yagZ/ecpA) E. coli common pilus structural subunit EcpA [ECP (VF0404) - Adherence (VFC0001)] [Escherichia coli O157:H7 (VF0189) - Adherence (VFC0001)]

VFG048654(gb|WP\_004224345) (vasE/tssK) type VI secretion system baseplate subunit TssK [T6SS (VF0569) - Secretion (VFC0000)] [Pseudomonas aeruginosa (VF0273) - Secretion (VFC0000)]

VFG038576(gb|WP\_016349164) (mshC) MSHA (mannose-sensitive hemagglutinin) pili minor prepilin protein M [Pili minor prepilin protein M (VF0000) - Adherence (VFC0001)] [Neisseria meningitidis (VF0000) - Adherence (VFC0001)]

VFG000231 (pilC) pilus assembly protein [Type IV pili (VF0075) - Adherence (VFC0001)] [Neisseria meningitidis (VF0000) - Adherence (VFC0001)]

VFG049915(gb|WP\_001142968) (hcp2/tssD2) Type VI secretion system protein, Hcp family [T6SS (VF0579) - Secretion (VFC0000)] [Pseudomonas aeruginosa (VF0273) - Secretion (VFC0000)]

VFG041047(gb|NP\_252174) (tse3) type VI secretion system effector Tse3, glycoside hydrolase [HSI-I T6SS secreted effectors (VF0579) - Secretion (VFC0000)] [Pseudomonas aeruginosa (VF0273) - Secretion (VFC0000)]

VFG038317(gb|WP\_016352170) (tapD/pilD) prepilin peptidase [Tap type IV pili (VF0475) - Adherence (VFC0001)] [Pseudomonas aeruginosa (VF0273) - Adherence (VFC0001)]

VFG045571(gb|WP\_010948124) (LPG\_RS12190) Dot/Icm type IV secretion system effector [Dot/Icm T4SS secreted effectors (VF0000) - Secretion (VFC0000)] [Pseudomonas aeruginosa (VF0273) - Secretion (VFC0000)]

VFG038756(gb|WP\_011706626) (flrC) transcriptional activator [Polar flagella (VF0473) - Motility (VFC0204)] [Aeromonas hydrophila (VF0473) - Motility (VFC0204)]

VFG038707(gb|WP\_016350059) (cheA-2) chemotaxis protein CheA [Polar flagella (VF0473) - Motility (VFC0204)] [Aeromonas hydrophila (VF0473) - Motility (VFC0204)]

VFG000887(gb|WP\_000597713) (papK) P pilus minor subunit PapK [P fimbriae (VF0220) - Adherence (VFC0001)] [Escherichia coli O157:H7 (VF0189) - Adherence (VFC0001)]

VFG034915(gb|WP\_000225947) (espY4) Type III secretion system effector EspY4 [TTSS secreted effectors (VF000000) - Secretion (VFC0000)] [Escherichia coli O157:H7 (VF0189) - Secretion (VFC0000)]

VFG038639(gb|WP\_011705275) (fliI) flagellum-specific ATP synthase [Polar flagella (VF0473) - Motility (VFC0204)] [Flagella (VF0473) - Motility (VFC0204)]

VFG045790(gb|WP\_000833288) (cgsE) curli production assembly/transport protein CsgE [Curli fibers (VF1138) - Adherence (VFC0001)] [Curli fibers (VF1138) - Adherence (VFC0001)]

VFG038890(gb|WP\_005314213) (lafU) LafU, chemotaxis protein [Lateral flagella (VF0474) - Motility (VFC0204)] [Lateral flagella (VF0474) - Motility (VFC0204)]

VFG002275(gb|WP\_003467630) (pfoA) perfringolysin O [Theta-toxin/PFO (VF0382) - Exotoxin (VFC0235)] [Theta-toxin/PFO (VF0382) - Exotoxin (VFC0235)]

VFG016472(gb|WP\_011206327) (p216) protein P216, cilium adhesin p97 paralog [P97/P102 paralog family (VF0473) - Motility (VFC0204)] [P97/P102 paralog family (VF0473) - Motility (VFC0204)]

VFG048620(gb|WP\_014907843) (iutA) ferric aerobactin receptor IutA [Aerobactin (VF0565) - Nutritional/Metabolic factors (VFC0086)] [Aerobactin (VF0565) - Nutritional/Metabolic factors (VFC0086)]

VFG000925(gb|WP\_000140634) (fepC) ferrienterobactin ABC transporter ATPase [Enterobactin (VF0228) - Nutritional/Metabolic factors (VFC0086)] [Enterobactin (VF0228) - Nutritional/Metabolic factors (VFC0086)]

VFG049084(gb|WP\_004175264) (rfbB) O-antigen export ABC transporter ATP-binding protein RfbB [LPS (VF0085) - Immune modulation (VFC00139)] [LPS (VF0085) - Immune modulation (VFC00139)]

VFG034859(gb|WP\_010904544) (espX2) Type III secretion system effector EspX2 [TTSS secreted effectors (VF0473) - Motility (VFC0204)] [TTSS secreted effectors (VF0473) - Motility (VFC0204)]

VFG038324(gb|WP\_005320804) (ascH) Type III secretion system protein AscH, regulator needle assembling [TTSS secreted effectors (VF0473) - Motility (VFC0204)] [TTSS secreted effectors (VF0473) - Motility (VFC0204)]

VFG040863(gb|WP\_011190526) (sca2) cell surface antigen Sca2 [Sca2 (VF0495) - Motility (VFC0204)] [Rickettsia (VF0495) - Motility (VFC0204)]

VFG049163(gb|WP\_000065646) (clbQ) colibactin biosynthesis thioesterase ClbQ [Colibactin (VF0573) - Exotoxin (VFC0235)] [Colibactin (VF0573) - Exotoxin (VFC0235)]

VFG046732(gb|WP\_003020707) (FTT\_RS04140) glycosyltransferase family 2 protein [Capsule (VF0543) - Immune modulation (VFC00139)] [Capsule (VF0543) - Immune modulation (VFC00139)]

VFG049917(gb|WP\_000508696) (rhs/PAAR) Type VI secretion system protein, PAAR family [T6SS (VF0579) - Effector delivery system (VFC00086)] [T6SS (VF0579) - Effector delivery system (VFC00086)]

VFG000886(gb|WP\_000261297) (papJ) P pilus assembly protein PapJ [P fimbriae (VF0220) - Adherence (VFC0001)] [P fimbriae (VF0220) - Adherence (VFC0001)]

VFG001403(gb|NP\_216899) (mbtB) Phenylloxazoline synthase MbtB (phenylloxazoline synthetase) [Mycobactin (VF0579) - Effector delivery system (VFC00086)] [Mycobactin (VF0579) - Effector delivery system (VFC00086)]

VFG038309(gb|WP\_016349344) (exeM) general secretion pathway protein M [Exe T2SS (VF0478) - Effector delivery system (VFC00086)] [Exe T2SS (VF0478) - Effector delivery system (VFC00086)]

VFG041315(gb|WP\_010947866) (sidJ) Dot/Icm type IV secretion system effector SidJ [Dot/Icm T4SS secreted effectors (VF0473) - Motility (VFC0204)] [Dot/Icm T4SS secreted effectors (VF0473) - Motility (VFC0204)]

VFG050169(gb|WP\_000124301) (kpsM) Polysialic acid transport protein [K1 capsule (VF0239) - Invasion (VFC0001)] [K1 capsule (VF0239) - Invasion (VFC0001)]

VFG012343(gb|WP\_001234182) (sfaH) S fimbriae adhesin SfaH [S fimbriae (VF0222) - Adherence (VFC0001)] [S fimbriae (VF0222) - Adherence (VFC0001)]

VFG000477(gb|NP\_461845) (rpoS) RNA polymerase sigma factor RpoS [RpoS (VF0112) - Regulation (VFC0300)] [RpoS (VF0112) - Regulation (VFC0300)]

VFG049903(gb|WP\_001240533) (tssA) Type VI secretion system protein TssA [T6SS (VF0579) - Effector delivery system (VFC00086)] [T6SS (VF0579) - Effector delivery system (VFC00086)]

VFG038892(gb|WP\_043118302) (aerA/act) Aerolysin A [Aerolysin (VF0481) - Exotoxin (VFC0235)] [Aeromonas (VF0481) - Exotoxin (VFC0235)]

VFG001266(gb|NP\_252912) (pchI) ABC transporter ATP-binding protein [Pyochelin (VF0095) - Nutritional/Metabolic factors (VFC0086)] [Pyochelin (VF0095) - Nutritional/Metabolic factors (VFC0086)]

VFG000361(gb|WP\_000982866) (ybtU) yersiniabactin biosynthetic protein YbtU [Yersiniabactin (VF0136) - Nutritional/Metabolic factors (VFC0086)] [Yersiniabactin (VF0136) - Nutritional/Metabolic factors (VFC0086)]

VFG000446(gb|NP\_459541) (fimD) usher protein FimD [Type 1 fimbriae (VF0102) - Adherence (VFC0001)] [S fimbriae (VF0102) - Adherence (VFC0001)]

VFG043016(gb|NP\_250155) (PA1464) purine-binding chemotaxis protein [Flagella (VF0273) - Motility (VFC0204)] [Flagella (VF0273) - Motility (VFC0204)]

VFG000905(gb|WP\_001546261) (hlyC) Hemolysin C [-Hemolysin (VF0225) - Exotoxin (VFC0235)] [Escherichia coli (VF0225) - Exotoxin (VFC0235)]

VFG000139(gb|NP\_253697) (waaG) B-band O-antigen polymerase [LPS (VF0085) - Immune modulation (VFC00139)] [LPS (VF0085) - Immune modulation (VFC00139)]

VFG000114(gb|NP\_253218) (xcpA/pilD) type 4 prepilin peptidase PilD [Type IV pili (VF0082) - Adherence (VFC0001)] [Type IV pili (VF0082) - Adherence (VFC0001)]

VFG012122(gb|WP\_010968250) (cpb2) beta2-toxin [Beta2-toxin (VF0417) - Exotoxin (VFC0235)] [Clostridium (VF0417) - Exotoxin (VFC0235)]

VFG050157(gb|WP\_001331698) (kpsF) Polysialic acid capsule expression protein [K1 capsule (VF0239) - Invasion (VFC0001)] [K1 capsule (VF0239) - Invasion (VFC0001)]

VFG038331(gb|WP\_005320790) (exsD) Type III secretion system protein ExsD [T3SS (VF0479) - Effector delivery system (VFC00086)] [T3SS (VF0479) - Effector delivery system (VFC00086)]

VFG002056 (gspM) general secretion pathway protein M [T2SS (VF0333) - Effector delivery system (VFC00086)] [T2SS (VF0333) - Effector delivery system (VFC00086)]

VFG041042(gb|NP\_251060) (PA2370) hypothetical protein [HSI-3 (VF0944) - Effector delivery system (VFC00086)] [HSI-3 (VF0944) - Effector delivery system (VFC00086)]

VFG012609(gb|WP\_000993317) (chuW) Putative oxygen independent coproporphyrinogen III oxidase [Chu (VF0473) - Motility (VFC0204)] [Chu (VF0473) - Motility (VFC0204)]

VFG038889(gb|WP\_005314215) (lafT) LafT, flagella motor stator protein [Lateral flagella (VF0474) - Motility (VFC0204)] [Lateral flagella (VF0474) - Motility (VFC0204)]

VFG000001(gb|WP\_010930610) (fhaB) filamentous hemagglutinin/adhesin [FHA (VF0025) - Adherence (VFC0001)] [FHA (VF0025) - Adherence (VFC0001)]

VFG038488(gb|WP\_016349432) (tapY1) type IV pilus biogenesis protein [Tap type IV pili (VF0475) - Adherence (VFC0001)] [Tap type IV pili (VF0475) - Adherence (VFC0001)]

VFG049120(gb|WP\_012737535) (allB) allantoinase [Allantoin utilization (VF0572) - Nutritional/Metabolic factors (VFC0086)] [Allantoin utilization (VF0572) - Nutritional/Metabolic factors (VFC0086)]

VFG041109(gb|NP\_459283) (STM0285) hypothetical protein [SCI (Salmonella centrisome island) (VF0974) - Effector delivery system (VFC00086)] [SCI (Salmonella centrisome island) (VF0974) - Effector delivery system (VFC00086)]

VFG038032 (ACICU\_RS00455\*) EpsG family protein [Capsule (VF0465) - Immune modulation (VFC0258)] [Acidithiobacillus (VF0465) - Immune modulation (VFC0258)]

VFG038297(gb|WP\_016349341) (exeJ) general secretion pathway protein J [Exe T2SS (VF0478) - Effector delivery system (VFC00086)] [Exe T2SS (VF0478) - Effector delivery system (VFC00086)]

VFG038800(gb|WP\_016351322) (flgD) flagellar hook capping protein [Polar flagella (VF0473) - Motility (VFC0204)] [Polar flagella (VF0473) - Motility (VFC0204)]

VFG002521(gb|WP\_004525693) (flhF) flagellar biosynthesis regulator FlhF [Flagella (VF0430) - Motility (VFC0204)] [Flagella (VF0430) - Motility (VFC0204)]

VFG001224(gb|NP\_249087) (pilU) twitching motility protein PilU [Type IV pili (VF0082) - Adherence (VFC0001)] [Type IV pili (VF0082) - Adherence (VFC0001)]



VFG038572(gb|WP\_016349165) (mshD) MSHA (mannose-sensitive hemagglutinin) pili minor prepilin protein M

VFG038816(gb|WP\_011706646) (cheV) CheV [Polar flagella (VF0473) - Motility (VFC0204)] [Aeromonas hyd

VFG050166(gb|WP\_000066003) (neuB) N-acylneuraminate-9-phosphate synthase [K1 capsule (VF0239) - Invas

VFG013368(gb|WP\_005693225) (rffG) dTDP-glucose 46-dehydratase [LOS (VF0044) - Immune modulation (V

VFG046206(gb|NP\_820798) (CBU\_1819) Coxiella Dot/Icm type IVB secretion system translocated effector [T4

VFG045791(gb|WP\_000481500) (cgsD) transcriptional regulator CsgD [Curli fibers (VF1138) - Adherence (VFC

VFG038365(gb|WP\_011705044) (hcp1) HcpA-like protein [T6SS (VF0480) - Effector delivery system (VFC008

VFG049153(gb|WP\_000159201) (clbG) colibactin biosynthesis acyltransferase ClbG [Colibactin (VF0573) - Exo

VFG013065(gb|WP\_024259428) (shuT) periplasmic binding protein ShuT [Shu (VF0256) - Nutritional/Metaboli

VFG000127(gb|NP\_252235) (algG) outer membrane protein AlgE [Alginate (VF0091) - Biofilm (VFC0271)] [Ps

VFG050213(gb|WP\_011861889) (CD3246) Cys-Gln thioester bond-forming surface protein [CD3246 (VF0599)

VFG010850 (rtxA) structural toxin protein RtxA [RtxA (VF0259) - Exotoxin (VFC0235)] [Legionella pneumoph

VFG048468(gb|WP\_004176917) (fepD) iron-enterobactin transporter membrane protein [Ent (VF0562) - Nutritio

VFG049155(gb|WP\_000829570) (clbI) colibactin polyketide synthase ClbI [Colibactin (VF0573) - Exotoxin (VF

VFG001822(gb|NP\_216897) (mbtD) Polyketide synthetase MbtD (polyketide synthase) [Mycobactin (VF0299) -

VFG042390(gb|WP\_011478152) (sfaX) regulatory protein SfaX [S fimbriae (VF0222) - Adherence (VFC0001)]

VFG013064(gb|WP\_000089574) (shuA) outer membrane heme/hemoglobin receptor ShuA [Shu (VF0256) - Nut

VFG038387(gb|WP\_011705717) (atsJ) Type VI secretion system protein [T6SS (VF0480) - Effector delivery sys

VFG001355(gb|WP\_000698569) (cbpD) choline binding protein D [Autolysin (VF0143) - Exoenzyme (VFC025

VFG015515(gb|NP\_252903) (phzE1) phenazine biosynthesis protein PhzE [Pyocyanin (VF0100) - Nutritional/M

VFG038273(gb|WP\_016349335) (exeD) general secretion pathway protein D [Exe T2SS (VF0478) - Effector del

VFG038432(gb|WP\_016352168) (tapB) type IV pilus assembly ATPase, PilB-like [Tap type IV pili (VF0475) - A

VFG000184(gb|NP\_251795) (xcpQ) general secretion pathway protein D [Xcp secretion system (VF0084) - Effe

VFG045635(gb|WP\_002296629) (sgrA) cell wall anchored protein SgrA [SgrA (VF0540) - Adherence (VFC000

VFG048338(gb|WP\_002916079) (mrkI) LuxR family regulatory protein [Type 3 fimbriae (VF0567) - Biofilm (V

VFG034815(gb|WP\_000671689) (espR1) Type III secretion system effector espR1 [TTSS secreted effectors (VF

VFG038144(gb|WP\_001062908) (galE) UDP-glucose 4-epimerase GalE [Capsule (VF0465) - Immune modulation

VFG048419(gb|WP\_004210873) (entB) 2,3-dihydro-2,3-dihydroxybenzoate synthetase, isochroismatase [Ent (V

VFG048518(gb|WP\_012737617) (fepA) outer membrane receptor FepA [Ent (VF0562) - Nutritional/Metabolic f

VFG049835(gb|WP\_012076956) (exlA) hemolysin [Exolysin (VF0582) - Effector delivery system (VFC0086)] [

VFG000112(gb|NP\_253216) (pilB) type 4 fimbrial biogenesis protein PilB [Type IV pili (VF0082) - Adherence (

VFG002196(gb|WP\_011109578) (EF3023) polysaccharide lyase, family 8 [Hyaluronidase (VF0359) - Exoenzym

VFG038695(gb|WP\_017409955) (fliA) flagellar biosynthesis sigma factor [Polar flagella (VF0473) - Motility (V

VFG038493(gb|WP\_016349428) (tppE) type IV pilus pseudopilin [Tap type IV pili (VF0475) - Adherence (VFC

VFG000347(gb|WP\_010869038) (hgpC) hemoglobin-binding protein [Hgp (VF0270) - Nutritional/Metabolic fac

VFG002543(gb|WP\_011205386) (bspR4) LuxR family transcriptional regulator [Quorum-sensing (VF0433) - Bi

VFG047478(gb|WP\_003020972) (bioC) biotin synthesis protein BioC [Biotin synthesis (VF0552) - Nutritional/M

VFG038590(gb|WP\_043118275) (mshE) ATPase protein MshE, GspE-like [MSHA type IV pili (VF0477) - Adh

VFG001265(gb|NP\_250145) (fleN) flagellar synthesis regulator FleN [Flagella (VF0273) - Motility (VFC0204)]

VFG001381(gb|YP\_177728) (icl) Isocitrate lyase Icl (isocitrase) (isocitratase) [Isocitrate lyase (VF0253) - Others

VFG038675(gb|WP\_011705283) (fliR) flagellar biosynthesis protein FliR [Polar flagella (VF0473) - Motility (V

VFG034922(gb|WP\_001303732) (espY5) hypothetical protein [TTSS secreted effectors (VF1110) - Effector deli

VFG050300(gb|NP\_250641) (fapF) outer membrane secretin FapF [Fap (VF1191) - Adherence (VFC0001)] [Pse

VFG047777(gb|WP\_003022126) (pdpB) Type VI secretion system TssM homolog [T6SS (VF0544) - Effector de

VFG001817(gb|NP\_216900) (mbtA) Bifunctional enzyme MbtA: salicyl-AMP ligase (SAL-AMP ligase) + salicy

VFG038401(gb|WP\_011705724) (atsQ) Type VI secretion system protein [T6SS (VF0480) - Effector delivery sy

VFG002190(gb|WP\_002362225) (*cpsA*/*uppS*) undecaprenyl diphosphate synthase [Capsule (VF0361) - Immune modulation (VFC0083)] [Escherichia coli (VF000000)]

VFG006938(gb|WP\_000252812) (*mshK*) MSHA biogenesis protein MshK [MSHA pili (VF0515) - Adherence (VFC0001)] [Francisella tularensis (VF000000)]

VFG048819(gb|WP\_014907234) (*KP1\_RS17280*) mannose-1-phosphate guanylyltransferase/mannose-6-phosphate guanylyltransferase [Mannose-6-phosphate guanylyltransferase (VF0566) - Adherence (VFC0001)] [Klebsiella pneumoniae (VF000000)]

VFG003561(gb|WP\_005173823) (*yst1E*) type II secretion system ATPase GspE [Yst1 T2SS (VF0635) - Effector delivery (VFC0001)] [Yersinia enterocolitica (VF000000)]

VFG046169 (CBU\_0820\*) *Coxiella* Dot/Icm type IVB secretion system translocated effector [T4SS secreted effector (VF0635) - Effector delivery (VFC0001)] [*Coxiella burnetii* (VF000000)]

VFG038305(gb|WP\_016349343) (*exeL*) general secretion pathway protein L [Exe T2SS (VF0478) - Effector delivery (VFC0001)] [Enterobacteriaceae (VF000000)]

VFG000934(gb|WP\_000348393) (*entA*) 2,3-dihydro-2,3-dihydroxybenzoate dehydrogenase EntA [Enterobactin (VF0562) - Nutritional/Metabolic factor (VFC0271)] [Enterobacteriaceae (VF000000)]

VFG007866(gb|NP\_217451) (*ppsE*) phthiocerol synthesis polyketide synthase type I PpsE [PDIM (VF0309) - Immune modulation (VFC0083)] [Mycobacterium tuberculosis (VF000000)]

VFG038332(gb|WP\_192914500) (*exsA*) Type III secretion system transcriptional regulator [T3SS (VF0479) - Effector delivery (VFC0001)] [Yersinia enterocolitica (VF000000)]

VFG013066 (*shuW*) heme anaerobic degradation radical SAM methyltransferase ChuW/HutW [Shu (VF0256) - Immune modulation (VFC0083)] [Escherichia coli (VF000000)]

VFG000155(gb|NP\_252168) (*rhlB*) rhamnolipin synthase chain B [Rhamnolipid (VF0089) - Immune modulation (VFC0083)] [Pseudomonas aeruginosa (VF000000)]

VFG002182(gb|WP\_002376666) (*cpsI*) UDP-galactopyranose mutase [Capsule (VF0361) - Immune modulation (VFC0083)] [Escherichia coli (VF000000)]

VFG001231(gb|NP\_249104) (*chpA*) still frameshift probable component of chemotactic signal transduction system [CheR (VF0473) - Motility (VFC0271)] [Yersinia enterocolitica (VF000000)]

VFG038812(gb|WP\_011706645) (*cheR-3*) chemotaxis protein CheR [Polar flagella (VF0473) - Motility (VFC0271)] [Yersinia enterocolitica (VF000000)]

VFG000937(gb|WP\_000750139) (*iucD*) L-lysine 6-monooxygenase IucD [Aerobactin (VF0229) - Nutritional/Metabolic factor (VFC0271)] [Enterobacteriaceae (VF000000)]

VFG001362(gb|WP\_000088129) (*zmpC*) immunoglobulin A1 protease [IgA1 protease (VF0147) - Immune modulation (VFC0083)] [Escherichia coli (VF000000)]

VFG038269(gb|WP\_075384415) (*exeC*) general secretion pathway protein C [Exe T2SS (VF0478) - Effector delivery (VFC0001)] [Enterobacteriaceae (VF000000)]

VFG002482(gb|WP\_011205630) (*tagAB-5*) Type VI secretion system associated protein TagAB-5 [T6SS-1 (VF0635) - Effector delivery (VFC0001)] [Yersinia enterocolitica (VF000000)]

VFG048267(gb|WP\_015875145) (*fimC*) periplasmic chaperone [Type I fimbriae (VF0566) - Adherence (VFC0001)] [Enterobacteriaceae (VF000000)]

VFG002229(gb|WP\_002963676) (*wbkB*) perosamine synthetase WbkB [LPS (VF0367) - Immune modulation (VFC0083)] [Escherichia coli (VF000000)]

VFG012033(gb|YP\_002344722) (*pseD/maf2*) motility accessory factor PseD [Flagella (VF0114) - Motility (VFC0271)] [Yersinia enterocolitica (VF000000)]

VFG001443(gb|AAF37887) (*ompA*) outer membrane protein A [OmpA (VF0236) - Invasion (VFC0083)] [Escherichia coli (VF000000)]

VFG000894(gb|WP\_001239363) (*papH*) P pilus termination subunit PapH [P fimbriae (VF0220) - Adherence (VFC0001)] [Escherichia coli (VF000000)]

VFG046465(gb|WP\_003028672) (*tufA*) elongation factor Tu [EF-Tu (VF0460) - Adherence (VFC0001)] [Francisella tularensis (VF000000)]

VFG002189(gb|WP\_002359680) (*cpsB/cdsA*) phosphatidate cytidylyltransferase [Capsule (VF0361) - Immune modulation (VFC0083)] [Escherichia coli (VF000000)]

VFG019178(gb|WP\_012291519) (*bont*) botulinum neurotoxin, BoNT [BoNT (VF0375) - Exotoxin (VFC0235)] [Clostridium botulinum (VF000000)]

VFG000133(gb|NP\_252241) (*algA*) phosphomannose isomerase / guanosine 5'-diphospho-D-mannose pyrophosphatase [Alginate (VF0091) - Biofilm (VFC0271)] [Pseudomonas aeruginosa (VF000000)]

VFG048980(gb|WP\_041937790) (*KP1\_RS17345*) capsule assembly Wzi family protein [Capsule (VF0560) - Immune modulation (VFC0083)] [Klebsiella pneumoniae (VF000000)]

VFG048508(gb|WP\_012737618) (*fes*) enterobactin/ferric enterobactin esterase [Ent (VF0562) - Nutritional/Metabolic factor (VFC0271)] [Enterobacteriaceae (VF000000)]

VFG000131(gb|NP\_252239) (*algJ*) alginate o-acetyltransferase AlgJ [Alginate (VF0091) - Biofilm (VFC0271)] [Pseudomonas aeruginosa (VF000000)]

VFG000922(gb|WP\_000910402) (*chuU*) heme permease protein ChuU [Chu (VF0227) - Nutritional/Metabolic factor (VFC0271)] [Escherichia coli (VF000000)]

VFG022019(gb|NP\_214796) (*eccA3*) Type VII secretion system protein EccA3 [ESX-3 (VF0521) - Effector delivery (VFC0001)] [Mycobacterium tuberculosis (VF000000)]

VFG038663(gb|WP\_005298795) (*fliO*) flagellar biosynthesis protein, FliO [Polar flagella (VF0473) - Motility (VFC0271)] [Yersinia enterocolitica (VF000000)]

VFG000895(gb|WP\_000654937) (*papC*) usher protein PapC [P fimbriae (VF0220) - Adherence (VFC0001)] [Escherichia coli (VF000000)]

VFG049156(gb|WP\_077265119) (*clbJ*) colibactin non-ribosomal peptide synthetase ClbJ [Colibactin (VF0573) - Exotoxin (VFC0235)] [Escherichia coli (VF000000)]

VFG000908(gb|WP\_000860472) (*hlyD*) Hemolysin D [-Hemolysin (VF0225) - Exotoxin (VFC0235)] [Escherichia coli (VF000000)]

VFG049160(gb|WP\_001327259) (*clbN*) colibactin non-ribosomal peptide synthetase ClbN [Colibactin (VF0573) - Exotoxin (VFC0235)] [Escherichia coli (VF000000)]

VFG038285(gb|WP\_005308483) (*exeG*) general secretion pathway protein G [Exe T2SS (VF0478) - Effector delivery (VFC0001)] [Enterobacteriaceae (VF000000)]

VFG001815(gb|NP\_215679) (*narJ*) nitrate reductase subunit delta [Nitrate reductase (VF0302) - Nutritional/Metabolic factor (VFC0271)] [Escherichia coli (VF000000)]

VFG047401(gb|WP\_011242229) (*feoB*) Fe(2+) transporter permease subunit FeoB [FupA (VF0550) - Nutritional/Metabolic factor (VFC0271)] [Escherichia coli (VF000000)]

VFG002070(gb|NP\_248774) (*hsiC1/vipB/tssC*) type VI secretion system tubule-forming protein VipB [HSI-I (VF0566) - Adherence (VFC0001)] [Yersinia enterocolitica (VF000000)]

VFG044336(gb|WP\_050767835) (*iroC*) ABC transporter [Sal (VF0563) - Nutritional/Metabolic factor (VFC0271)] [Escherichia coli (VF000000)]

VFG048528(gb|WP\_004183335) (*entD*) enterochelin synthetase component D [Ent (VF0562) - Nutritional/Metabolic factor (VFC0271)] [Enterobacteriaceae (VF000000)]

VFG000920(gb|WP\_000020034) (*chuX*) putative heme-binding protein ChuX [Chu (VF0227) - Nutritional/Metabolic factor (VFC0271)] [Escherichia coli (VF000000)]

VFG000936(gb|WP\_016265865) (*iutA*) ferric aerobactin receptor precursor IutA [Aerobactin (VF0229) - Nutritional/Metabolic factor (VFC0271)] [Enterobacteriaceae (VF000000)]

VFG013236(gb|WP\_005693864) (*kdsB*) 3-deoxy-manno-octulosonate cytidylyltransferase [LOS (VF0044) - Immune modulation (VFC0083)] [Yersinia enterocolitica (VF000000)]

VFG000618(gb|NP\_709457) (*iucD*) aerobactin synthesis protein IucC, lysine 6-monooxygenase [Aerobactin (VF000618) - Effector delivery system (VFC000618)]

VFG007182(gb|WP\_005464333) (*vopQ*) type III secretion system effector VopQ [T3SS1 secreted effectors (VFC007182) - Effector delivery system (VFC007182)]

VFG038703(gb|WP\_011705289) (*cheZ*) chemotaxis protein CheZ [Polar flagella (VF0473) - Motility (VFC020473)]

VFG002059(gb|NP\_248763) (*tagT*) type six secretion associated protein TagT, ATP-binding component of ABC transporter [Type VI secretion system (VF002059) - Effector delivery system (VFC002059)]

VFG049912 (*tssC*) Type VI secretion system protein TssC [T6SS (VF0579) - Effector delivery system (VFC00849912)]

VFG038564(gb|WP\_016349167) (*mshP*) hypothetical protein [MSHA type IV pili (VF0477) - Adherence (VFC0038564)]

VFG001282(gb|WP\_000841389) (*fnbB*) fibronectin-binding protein B [FnBPs (VF0010) - Adherence (VFC0001282)]

VFG034679(gb|WP\_000074207) (*ibeB*) Cu(+)/Ag(+) efflux RND transporter outer membrane channel CusC [IbeB (VF034679) - Effector delivery system (VFC0034679)]

VFG041010(gb|NP\_248760) (*tagQ*) type VI secretion associated protein TagQ, outer membrane lipoprotein [HSI-3 (VF041010) - Effector delivery system (VFC0041010)]

VFG002434(gb|WP\_011205650) (*pilN*) type IV pilus inner membrane platform protein PilN [Type IV pili (VF0475) - Adherence (VFC002434)]

VFG049149(gb|WP\_041169023) (*clbC*) colibactin polyketide synthase ClbC [Colibactin (VF0573) - Exotoxin (VFC0049149)]

VFG000940(gb|WP\_001299620) (*iucA*) aerobactin siderophore biosynthesis protein IucD [Aerobactin (VF0229) - Effector delivery system (VFC000940)]

VFG000359(gb|WP\_001088826) (*ybtE*) yersiniabactin siderophore biosynthetic protein [Yersiniabactin (VF0136) - Effector delivery system (VFC000359)]

VFG038615(gb|WP\_016349152) (*mshI*) MSHA (mannose-sensitive hemagglutinin) pili biogenesis protein MshI [MSHA (VF038615) - Adherence (VFC0038615)]

VFG050160(gb|WP\_000030755) (*kpsU*) 3-deoxy-manno-octulosonate cytidyltransferase [K1 capsule (VF0239) - Adherence (VFC0050160)]

VFG038623(gb|WP\_011705271) (*fliE*) flagellar hook-basal body complex protein FliE [Polar flagella (VF0473) - Motility (VFC0038623)]

VFG041098(gb|NP\_459271) (*STM0274*) EvpB family type VI secretion protein [SCI (Salmonella centrisome island) (VF041098) - Effector delivery system (VFC0041098)]

VFG011429(gb|WP\_002963985) (*acpXL*) acyl carrier protein [LPS (VF0367) - Immune modulation (VFC0258)]

VFG002285(gb|WP\_011590492) (*nanH*) sialidase [Sialidase (VF0391) - Exoenzyme (VFC0251)] [Clostridium perfringens (VF002285) - Exoenzyme (VFC0251)]

VFG038347(gb|WP\_005320757) (*aopN*) AopN, secretion control of translocators and immune suppressor [T3SS1 secreted effectors (VFC0038347) - Effector delivery system (VFC0038347)]

VFG038436(gb|WP\_016352169) (*tapC*) type IV fimbrial assembly protein, PilC-like [Tap type IV pili (VF0475) - Adherence (VFC0038436)]

VFG002416(gb|WP\_001265657) (*yagW/ecpD*) polymerized tip adhesin of ECP fibers [ECP (VF0404) - Adherence (VFC002416)]

VFG001267(gb|NP\_252913) (*pchH*) ABC transporter ATP-binding protein [Pyochelin (VF0095) - Nutritional/Metabolism (VFC001267)]

VFG012095(gb|WP\_003435012) (*groEL*) chaperonin GroEL [GroEL (VF0594) - Adherence (VFC0001)] [Clostridium perfringens (VF012095) - Adherence (VFC0001)]

VFG043648(gb|NP\_252312) (*rpoS*) RNA polymerase sigma factor RpoS [Type IV pili (VF0082) - Adherence (VFC0043648)]

VFG012615(gb|WP\_000020049) (*chuX*) putative heme-binding protein ChuX [Chu (VF0234) - Nutritional/Metabolism (VFC0012615)]

VFG043625(gb|WP\_000813718) (*mrkC*) fimbrial biogenesis outer membrane usher protein mrkC precursor [Type IV pili (VF0475) - Adherence (VFC0043625)]

VFG010491(gb|WP\_010947066) (*LPG\_RS06695*) L,D-transpeptidase [Enh loci (VF0163) - Others (VFC0346)]

VFG002051(gb|WP\_001115126) (*gspH*) general secretion pathway protein H [T2SS (VF0333) - Effector delivery system (VFC002051)]

VFG041032(gb|NP\_251050) (*PA2360*) hypothetical protein [HSI-3 (VF0944) - Effector delivery system (VFC0041032)]

VFG001210(gb|NP\_253244) (*pilY1*) type 4 fimbrial biogenesis protein PilY1 [Type IV pili (VF0082) - Adherence (VFC001210)]

VFG038155(gb|WP\_000209960) (*ACICU\_RS00500*) phosphomannomutase/phosphoglucomutase [Capsule (VF000155) - Adherence (VFC0038155)]

VFG000142(gb|NP\_253698) (*waaC*) 3-deoxy-D-manno-octulosonic-acid (KDO) transferase [LPS (VF0085) - Immune modulation (VFC000142)]

VFG002481(gb|WP\_009940775) (*vgrG-5*) Type VI secretion system protein VgrG5 [T6SS-1 (VF0429) - Effector delivery system (VFC002481)]

VFG038472(gb|WP\_011706550) (*tapW*) twitching ATPase [Tap type IV pili (VF0475) - Adherence (VFC0001)]

VFG000844(gb|WP\_001034100) (*espP*) autotransporter, serine protease [EspP (VF0208) - Effector delivery system (VFC000844)]

VFG000036(gb|WP\_010929614) (*bplC*) lipopolysaccharide biosynthesis protein [LPS (VF0033) - Immune modulation (VFC000036)]

VFG000164(gb|NP\_252911) (*fptA*) Fe(III)-pyochelin receptor precursor [Pyochelin (VF0095) - Nutritional/Metabolism (VFC000164)]

VFG000190(gb|NP\_250386) (*pscP*) type III secretion system protein PscP [TTSS (VF0083) - Effector delivery system (VFC000190)]

VFG001228(gb|NP\_249102) (*pilJ*) twitching motility protein PilJ [Type IV pili (VF0082) - Adherence (VFC0001228)]

VFG038364(gb|WP\_005320615) (*aexT*) Type III secretion system effector AexT, bifunctional toxin with GTPase activity [Type III secretion system (VF038364) - Effector delivery system (VFC0038364)]

VFG002270(gb|WP\_011180104) (*badA/vomp/brp*) Surface protein/Bartonella adhesin BadA/VompA/VompC/VompD [Type IV pili (VF0082) - Adherence (VFC002270)]

VFG000120(gb|NP\_253949) (*algZ*) sigma factor AlgU [Alginate (VF0091) - Biofilm (VFC0271)] [Pseudomonas aeruginosa (VF000120) - Biofilm (VFC0271)]

VFG001816(gb|NP\_215680) (*narI*) nitrate reductase subunit gamma [Nitrate reductase (VF0302) - Nutritional/Metabolism (VFC001816)]

VFG038840(gb|WP\_005300916) (*flmH*) short chain dehydrogenase/reductase family oxidoreductase [Polar flagella (VF0473) - Motility (VFC0038840)]

VFG006902(gb|WP\_000957200) (*pilB*) type IV-A pilus assembly ATPase PilB [ChiRP (VF0609) - Adherence (VFC006902)]

VFG038480(gb|WP\_016349429) (*tppB*) type IV pilus pseudopilin [Tap type IV pili (VF0475) - Adherence (VFC000000)] [Type IV pili (VF0082) - Adherence (VFC000000)]

VFG049911(gb|WP\_000393837) (*tssF*) Type VI secretion system protein TssF [T6SS (VF0579) - Effector delivery (VFC000000)] [Type VI secretion system (VF0579) - Effector delivery (VFC000000)]

VFG002478(gb|WP\_004551874) (*tssF-5*) Type VI secretion system protein TssF [T6SS-1 (VF0429) - Effector delivery (VFC000000)] [Type VI secretion system (VF0579) - Effector delivery (VFC000000)]

VFG000876(gb|WP\_000120946) (*fimD*) Outer membrane usher protein *fimD* precursor [Type 1 fimbriae (VF0224) - Adherence (VFC000000)] [Type 1 fimbriae (VF0224) - Adherence (VFC000000)]

VFG000799(gb|WP\_000935759) (*espD*) Type III secretion system translocator protein EspD, pore protein [TTSS (VF0035) - Effector delivery (VFC000000)] [Type III secretion system (VF0035) - Effector delivery (VFC000000)]

VFG014304(gb|NP\_249784) (*fleI/flaG*) flagellar protein FlaG [Flagella (VF0273) - Motility (VFC0204)] [Pseudomonas flagella (VF0273) - Motility (VFC0204)]

VFG002277(gb|WP\_011009663) (*nagH*) hyaluronidase [Mu-toxin (VF0389) - Exoenzyme (VFC0251)] [Clostridium hyaluronidase (VF0389) - Exoenzyme (VFC0251)]

VFG048632(gb|WP\_004176434) (*vipA/tssB*) type VI secretion system contractile sheath small subunit VipA [T6SS (VF0579) - Effector delivery (VFC000000)] [Type VI secretion system (VF0579) - Effector delivery (VFC000000)]

VFG049908(gb|WP\_001080148) (*tssJ*) Type VI secretion system protein TssJ [T6SS (VF0579) - Effector delivery (VFC000000)] [Type VI secretion system (VF0579) - Effector delivery (VFC000000)]

VFG002054(gb|WP\_000633233) (*gspK*) general secretion pathway protein K [T2SS (VF0333) - Effector delivery (VFC000000)] [Type II secretion system (VF0333) - Effector delivery (VFC000000)]

VFG038593(gb|WP\_016349158) (*mshN*) Tetratricopeptide repeat protein, PilF-like [MSHA type IV pili (VF0475) - Adherence (VFC000000)] [MSHA type IV pili (VF0475) - Adherence (VFC000000)]

VFG038867(gb|WP\_005314284) (*lfiI*) lateral flagellar FliI-like assembly ATPase [Lateral flagella (VF0474) - Motility (VFC0204)] [Lateral flagella (VF0474) - Motility (VFC0204)]

VFG001225(gb|NP\_249099) (*pilG*) twitching motility protein PilG [Type IV pili (VF0082) - Adherence (VFC000000)] [Type IV pili (VF0082) - Adherence (VFC000000)]

VFG000739(gb|AAC38392) (*eae*) intimin [Intimin (VF0177) - Effector delivery system (VFC0086)] [Escherichia coli intimin (VF0177) - Effector delivery system (VFC0086)]

VFG048609(gb|WP\_004213923) (*iucD*) lysine 6-monooxygenase IucD [Aerobactin (VF0565) - Nutritional/Metabolic function (VFC000000)] [Aerobactin (VF0565) - Nutritional/Metabolic function (VFC000000)]

VFG002116(gb|WP\_010947864) (*sdeC/laiC*) Dot/Icm type IV secretion system effector SdeC [Dot/Icm T4SS secretion system (VF0224) - Adherence (VFC000000)] [Dot/Icm T4SS secretion system (VF0224) - Adherence (VFC000000)]

VFG034612(gb|WP\_000225871) (*cfaA*) colonisation factor antigen a, chaperone [Adhesive fimbriae (VF0213) - Adherence (VFC000000)] [Adhesive fimbriae (VF0213) - Adherence (VFC000000)]

VFG001950(gb|YP\_002344805) (*Cj1422c*) sugar transferase [Capsule (VF0323) - Immune modulation (VFC0251)] [Capsule (VF0323) - Immune modulation (VFC0251)]

VFG042976(gb|WP\_154081516) (*ebpA*) endocarditis and biofilm-associated pilus tip protein EbpA [Ebp pili (VF0475) - Adherence (VFC000000)] [Ebp pili (VF0475) - Adherence (VFC000000)]

VFG044083(gb|NP\_250948) (*ptxR*) transcriptional regulator PtxR [Pyoverdine (VF0094) - Nutritional/Metabolic function (VFC000000)] [Pyoverdine (VF0094) - Nutritional/Metabolic function (VFC000000)]

VFG038521(gb|WP\_016350155) (*flpI*) Flp pilus assembly protein FlpI [Flp type IV pili (VF0476) - Adherence (VFC000000)] [Flp type IV pili (VF0476) - Adherence (VFC000000)]

VFG002055(gb|WP\_000097229) (*gspL*) general secretion pathway protein L [T2SS (VF0333) - Effector delivery (VFC000000)] [Type II secretion system (VF0333) - Effector delivery (VFC000000)]

VFG048429(gb|WP\_004183353) (*entE*) enterobactin synthase subunit E [Ent (VF0562) - Nutritional/Metabolic function (VFC000000)] [Enterobactin synthase subunit E (VF0562) - Nutritional/Metabolic function (VFC000000)]

VFG038320(gb|WP\_005320812) (*ascL*) Type III secretion system C ring protein AscL [T3SS (VF0479) - Effector delivery (VFC000000)] [Type III secretion system (VF0479) - Effector delivery (VFC000000)]

VFG000912(gb|WP\_001443207) (*focD*) F1C fimbrial usher [F1C fimbriae (VF0224) - Adherence (VFC000000)] [F1C fimbriae (VF0224) - Adherence (VFC000000)]

VFG038378(gb|WP\_011705712) (*vipA*) Type VI secretion system contractile sheath small subunit TssB/VipA [T6SS (VF0579) - Effector delivery (VFC000000)] [Type VI secretion system (VF0579) - Effector delivery (VFC000000)]

VFG000478(gb|NP\_459678) (*fur*) ferric iron uptake transcriptional regulator [Fur (VF0113) - Regulation (VFC000000)] [Fur (VF0113) - Regulation (VFC000000)]

VFG041348(gb|WP\_010948513) (*ceg34*) Dot/Icm type IV secretion system effector Ceg34 [Dot/Icm T4SS secretion system (VF0224) - Adherence (VFC000000)] [Dot/Icm T4SS secretion system (VF0224) - Adherence (VFC000000)]

VFG002412(gb|WP\_000716386) (*yagY/ecpB*) E. coli common pilus chaperone EcpB [ECP (VF0404) - Adherence (VFC000000)] [ECP (VF0404) - Adherence (VFC000000)]

VFG038568(gb|WP\_016349166) (*mshO*) MSHA (mannose-sensitive hemagglutinin) pili biogenesis protein MshO [MSHA type IV pili (VF0475) - Adherence (VFC000000)] [MSHA type IV pili (VF0475) - Adherence (VFC000000)]

VFG001393(gb|NP\_215861) (*mbtM*) Probable fatty acyl-AMP ligase MbtM [Mycobactin (VF0299) - Nutritional/Metabolic function (VFC000000)] [Mycobactin (VF0299) - Nutritional/Metabolic function (VFC000000)]

VFG049007(gb|WP\_002911561) (*rcaA*) transcriptional activator for ctr capsule biosynthesis [RcsAB (VF0571) - Regulation (VFC000000)] [RcsAB (VF0571) - Regulation (VFC000000)]

VFG041016(gb|NP\_250349) (*PA1658*) hypothetical protein [HSI-2 (VF0943) - Effector delivery system (VFC000000)] [HSI-2 (VF0943) - Effector delivery system (VFC000000)]

VFG038863(gb|WP\_005314292) (*lfiE*) lateral flagellar hook basal body protein, LfiE [Lateral flagella (VF0474) - Motility (VFC0204)] [Lateral flagella (VF0474) - Motility (VFC0204)]

VFG042736(gb|NP\_253152) (*rpoN*) RNA polymerase factor sigma-54 [Type IV pili (VF0082) - Adherence (VFC000000)] [Type IV pili (VF0082) - Adherence (VFC000000)]

VFG000177(gb|NP\_251788) (*xcpW*) general secretion pathway protein J [Xcp secretion system (VF0084) - Effector delivery (VFC000000)] [Xcp secretion system (VF0084) - Effector delivery (VFC000000)]

VFG002513(gb|WP\_004197257) (*flgG*) flagellar basal body rod protein FlgG [Flagella (VF0430) - Motility (VFC0204)] [Flagella (VF0430) - Motility (VFC0204)]

VFG002181(gb|WP\_002387127) (*cpsJ*) ABC transporter, ATP-binding protein [Capsule (VF0361) - Immune modulation (VFC0251)] [Capsule (VF0361) - Immune modulation (VFC0251)]

VFG050162(gb|WP\_001161829) (*kpsS*) Capsule polysaccharide export protein [K1 capsule (VF0239) - Invasion (VFC000000)] [K1 capsule (VF0239) - Invasion (VFC000000)]

VFG048762(gb|WP\_015874732) (*impA/tssA*) type VI secretion system protein TssA [T6SS (VF0569) - Effector delivery (VFC000000)] [Type VI secretion system (VF0569) - Effector delivery (VFC000000)]

VFG038804(gb|WP\_011706643) (*flgC*) flagellar basal body rod protein FlgC [Polar flagella (VF0473) - Motility (VFC0204)] [Polar flagella (VF0473) - Motility (VFC0204)]

VFG012162(gb|WP\_011590241) (*nanJ*) exo-alpha-sialidase [Sialidase (VF0391) - Exoenzyme (VFC0251)] [Clostridium sialidase (VF0391) - Exoenzyme (VFC0251)]

VFG001269(gb|WP\_010929996) (*cyaB*) cyclolysin secretion ATP-binding protein [Cya (VF0028) - Exotoxin (VFC000000)] [Cya (VF0028) - Exotoxin (VFC000000)]

VFG049899(gb|WP\_001087735) (*tssA*) Type VI secretion system protein TssA [T6SS (VF0579) - Effector delivery (VFC000000)] [Type VI secretion system (VF0579) - Effector delivery (VFC000000)]

VFG000047(gb|WP\_003820063) (*bscO*) Bordetella Bsc type III secretion system protein BscO [TTSS (VF0035) - Effector delivery (VFC000000)] [Type III secretion system (VF0035) - Effector delivery (VFC000000)]

VFG050158(gb|WP\_000905916) (*kpsE*) Capsule polysaccharide export inner-membrane protein [K1 capsule (VF0239) - Invasion (VFC000000)] [K1 capsule (VF0239) - Invasion (VFC000000)]

VFG049157(gb|WP\_014907259) (clbK) colibactin hybrid non-ribosomal peptide synthetase/type I polyketide synthase [Colibactin (VF0094) - Immune modulation (VFC0258)] [Pseudomonas aeruginosa]

VFG015950(gb|NP\_251075) (pvdQ) 3-oxo-C12-homoserine lactone acylase PvdQ [Pyoverdine (VF0094) - Nutritional/Metabolic factor (VFC0272)] [Pseudomonas aeruginosa]

VFG038659(gb|WP\_011705280) (fliN) flagellar motor switch protein FliN [Polar flagella (VF0473) - Motility (VFC0204)] [Aeromonas hydrophila]

VFG043014(gb|NP\_250149) (PA1458) two-component sensor [Flagella (VF0273) - Motility (VFC0204)] [Pseudomonas aeruginosa]

VFG002559(gb|WP\_004194348) (wcbH) glycosyl transferase [Capsule I (VF0436) - Immune modulation (VFC0258)] [Pseudomonas aeruginosa]

VFG002062(gb|NP\_248766) (tagF/pppB) Pseudomonas protein phosphatase PppB [HSI-I (VF0334) - Effector delivery (VFC0258)] [Pseudomonas aeruginosa]

VFG038848(gb|WP\_016350360) (flmD) FlmD protein [Polar flagella (VF0473) - Motility (VFC0204)] [Aeromonas hydrophila]

VFG014109(gb|NP\_251839) (wbpH) glycosyltransferase WbpH [LPS (VF0085) - Immune modulation (VFC0258)] [Pseudomonas aeruginosa]

VFG038655(gb|WP\_011705279) (fliM) flagellar motor switch protein FliM [Polar flagella (VF0473) - Motility (VFC0204)] [Aeromonas hydrophila]

VFG038587(gb|WP\_016349160) (mshG) MSHA (mannose-sensitive hemagglutinin) pili biogenesis protein MshG [Pili (VF0475) - Adherence (VFC0001)] [Aeromonas hydrophila]

VFG050414(gb|WP\_002027454.1) (pilF) type IV pilus biogenesis/stability protein PilW [TFP (VF1334) - Adherence (VFC0001)] [Pseudomonas aeruginosa]

VFG048962(gb|WP\_015875029) (KP1\_RS17335) protein-tyrosine-phosphatase [Capsule (VF0560) - Immune modulation (VFC0258)] [Pseudomonas aeruginosa]

VFG038456(gb|WP\_016351630) (tapP) type IV pilus biogenesis protein PilP [Tap type IV pili (VF0475) - Adherence (VFC0001)] [Aeromonas hydrophila]

VFG034849(gb|WP\_000129338) (espX1) Type III secretion system effector EspX1 [TTSS secreted effectors (VF0273) - Motility (VFC0204)] [Pseudomonas aeruginosa]

VFG012621(gb|WP\_000189352) (chuY) ChuY [Chu (VF0234) - Nutritional/Metabolic factor (VFC0272)] [Escherichia coli]

VFG034942(gb|WP\_000950813) (nleB2) Type III secretion system effector NleB2 [TTSS secreted effectors (VF0273) - Motility (VFC0204)] [Pseudomonas aeruginosa]

VFG002457(gb|WP\_011205638) (bsaU) Type III secretion system protein BsaU [Bsa T3SS (VF0428) - Effector delivery (VFC0258)] [Pseudomonas aeruginosa]

VFG038355(gb|WP\_005320739) (ascU) Type III secretion system inner membrane export apparatus protein AscU [Type III secretion system (VF0273) - Motility (VFC0204)] [Pseudomonas aeruginosa]

VFG050874(gb|WP\_001989189.1) (gspL) general secretion pathway protein L [T2SS (VF1335) - Effector delivery (VFC0258)] [Pseudomonas aeruginosa]

VFG000839(gb|WP\_001449026) (paa) outer membrane adhesin Paa [Paa (VF0194) - Adherence (VFC0001)] [Escherichia coli]

VFG002522(gb|WP\_004198639) (flhA) flagellar biosynthesis protein FlhA [Flagella (VF0430) - Motility (VFC0204)] [Pseudomonas aeruginosa]

VFG039311(gb|NP\_819427) (cetCb2) Coxiella Dot/Icm type IVB secretion system translocated effector [T4SS secretion system (VF0273) - Motility (VFC0204)] [Coxiella burnetii]

VFG014997(gb|NP\_252722) (mucE) small envelope protein MucE [Alginate (VF0091) - Biofilm (VFC0271)] [Pseudomonas aeruginosa]

VFG002492(gb|WP\_004184995) (fliN) flagellar motor switch protein FliN [Flagella (VF0430) - Motility (VFC0204)] [Pseudomonas aeruginosa]

VFG038529(gb|WP\_016350153) (flpG) Flp pilus assembly protein FlpG [Flp type IV pili (VF0476) - Adherence (VFC0001)] [Aeromonas hydrophila]

VFG001271(gb|WP\_010929998) (cyaE) cyclolysin secretion protein [Cya (VF0028) - Exotoxin (VFC0235)] [Bordetella pertussis]

VFG001263(gb|NP\_250143) (flhA) flagellar biosynthesis protein FlhA [Flagella (VF0273) - Motility (VFC0204)] [Pseudomonas aeruginosa]

VFG038768(gb|WP\_016351318) (flgL) flagellar hook-associated protein FlgL [Polar flagella (VF0473) - Motility (VFC0204)] [Aeromonas hydrophila]

VFG038352(gb|WP\_005320745) (ascR) Type III secretion system inner membrane export apparatus protein AscR [Type III secretion system (VF0273) - Motility (VFC0204)] [Pseudomonas aeruginosa]

VFG042382(gb|WP\_000260524) (etpB) two-partner secretion transporter EtpB [EtpA (VF0437) - Adherence (VFC0001)] [Pseudomonas aeruginosa]

VFG001241(gb|NP\_249774) (flgH) flagellar L-ring protein precursor FlgH [Flagella (VF0273) - Motility (VFC0204)] [Pseudomonas aeruginosa]

VFG012160(gb|WP\_011590331) (nanI) exo-alpha-sialidase [Sialidase (VF0391) - Exoenzyme (VFC0251)] [Clostridium difficile]

VFG002180(gb|WP\_002362627) (cpsK) ABC transporter, permease protein [Capsule (VF0361) - Immune modulation (VFC0258)] [Pseudomonas aeruginosa]

VFG034721(gb|WP\_000556298) (ibeC) phosphoethanolamine transferase CptA [Ibes (VF0237) - Invasion (VFC0258)] [Pseudomonas aeruginosa]

VFG002219(gb|WP\_011005413) (cgs) cyclic beta 1-2 glucan synthetase [CG (VF0366) - Immune modulation (VFC0258)] [Pseudomonas aeruginosa]

VFG000282(gb|WP\_000488766) (cag3) type IV secretion system protein Cag3, component outer membrane subunit [Type IV secretion system (VF0273) - Motility (VFC0204)] [Pseudomonas aeruginosa]

VFG012333(gb|WP\_000703306) (sfaD) S fimbriae minor subunit SfaD [S fimbriae (VF0222) - Adherence (VFC0001)] [Pseudomonas aeruginosa]

VFG048237(gb|WP\_002916189) (fimE) tyrosine recombinase [Type I fimbriae (VF0566) - Adherence (VFC0001)] [Pseudomonas aeruginosa]

VFG022114(gb|NP\_214803) (espG3) Type VII secretion system protein EspG3 [ESX-3 (VF0521) - Effector delivery (VFC0258)] [Pseudomonas aeruginosa]

VFG051042(gb|WP\_000653195.1) (hcp/tssD) type VI secretion system tube protein Hcp [T6SS (VF1337) - Effector delivery (VFC0258)] [Pseudomonas aeruginosa]

VFG048771(gb|WP\_004190505) (tssF) type VI secretion system baseplate subunit TssF [T6SS (VF0569) - Effector delivery (VFC0258)] [Pseudomonas aeruginosa]

VFG002165(gb|WP\_002356954) (efaA) endocarditis specific antigen [EfaA (VF0354) - Adherence (VFC0001)] [Pseudomonas aeruginosa]

VFG014105(gb|NP\_251843) (wzx) O-antigen translocase [LPS (VF0085) - Immune modulation (VFC0258)] [Pseudomonas aeruginosa]

VFG002287(gb|WP\_011860904) (toxA) toxin A [TcdA (VF0376) - Exotoxin (VFC0235)] [Clostridium difficile]

VFG002488(gb|WP\_004551879) (tssL-5) Type VI secretion system protein TssL [T6SS-1 (VF0429) - Effector delivery (VFC0258)] [Pseudomonas aeruginosa]

VFG034928(gb|WP\_001239082) (lifA/efa1) lymphostatin Efa1/LifA [Lymphostatin/LifA (VF0175) - Effector delivery (VFC0258)] [Pseudomonas aeruginosa]

VFG002050(gb|WP\_001087302) (*gspG*) general secretion pathway protein G [T2SS (VF0333) - Effector delivery]

VFG013390(gb|WP\_005651701) (*lpxA*) UDP-N-acetylglucosamine acyltransferase [LOS (VF0044) - Immune m]

VFG000871(gb|WP\_000790574) (*fimB*) Type 1 fimbriae Regulatory protein fimB [Type 1 fimbriae (VF0221) - A

VFG001252(gb|NP\_249793) (*fliG*) flagellar motor switch protein G [Flagella (VF0273) - Motility (VFC0204)] [I

VFG001233(gb|NP\_249106) (*chpC*) probable chemotaxis protein [Type IV pili (VF0082) - Adherence (VFC000

VFG016041(gb|NP\_251092) (*pvdI*) peptide synthase [Pyoverdine (VF0094) - Nutritional/Metabolic factor (VFC

VFG038464(gb|WP\_011707389) (*tapT*) twitching ATPase [Tap type IV pili (VF0475) - Adherence (VFC0001)]

VFG000938(gb|WP\_001015709) (*iucC*) aerobactin siderophore biosynthesis protein IucC [Aerobactin (VF0229)

VFG038719(gb|WP\_016350061) (*pomB*) ompA family protein [Polar flagella (VF0473) - Motility (VFC0204)] [

VFG049114(gb|WP\_012737527) (*allS*) DNA-binding transcriptional activator AllS [Allantion utilization (VF057

VFG045632(gb|WP\_002286924) (*ecbA/fss3*) Collagen binding MSCRAMM, EcbA/Fss3 [EcbA (VF0539) - Adh

VFG050165(gb|WP\_001259305) (*neuA*) N-acylneuraminate cytidyltransferase [K1 capsule (VF0239) - Invasio

VFG044332(gb|WP\_015874967) (*ybtE*) yersiniabactin biosynthesis salycil-AMP ligase YbtE [Ybt (VF0564) - N

VFG037822(gb|WP\_000240700) (*lpxC*) UDP-3-O-acyl-N-acetylglucosamine deacetylase [LPS (VF0466) - Imm

VFG047708(gb|WP\_003022611) (*carB*) carbamoyl phosphate synthase large subunit [Pyrimidine biosynthesis (V

VFG045789(gb|WP\_001264082) (*cgsF*) curli production assembly/transport protein CsgF [Curli fibers (VF1138)

VFG001232(gb|NP\_249105) (*chpB*) probable methylesterase [Type IV pili (VF0082) - Adherence (VFC0001)] [

VFG000122(gb|NP\_252230) (*algD*) GDP-mannose 6-dehydrogenase AlgD [Alginate (VF0091) - Biofilm (VFC0

VFG038691(gb|WP\_010634619) (*flhG*) CobQ/CobB/MinD/ParA family protein [Polar flagella (VF0473) - Motil

VFG000918(gb|WP\_001312167) (*chuT*) periplasmic heme-binding protein ChuT [Chu (VF0227) - Nutritional/M

VFG042739(gb|NP\_254019) (*crc*) catabolite repression control protein [Type IV pili (VF0082) - Adherence (VFC

VFG035916(gb|WP\_032490785) (*aatB*) AatB [Dispersin (VF0215) - Others (VFC0346)] [Escherichia coli O44:H

VFG002458(gb|WP\_004525314) (*bsaT*) Type III secretion system protein BsaT [Bsa T3SS (VF0428) - Effector d

VFG038860(gb|WP\_005314298) (*lfhB*) lateral flagellar biosynthetic protein, LfhB [Lateral flagella (VF0474) - M

VFG002470(gb|WP\_004533272) (*orgB*) Type III secretion system protein [Bsa T3SS (VF0428) - Effector delive

VFG038872(gb|WP\_005314272) (*lfgB*) lateral flagellar basal body protein, LfgB [Lateral flagella (VF0474) - Mo

VFG038880(gb|WP\_005314250) (*lfgK*) lateral flagellar hook-associated protein [Lateral flagella (VF0474) - Mo

VFG039501(gb|NP\_820443) (*coxCC7/cig44*) Coxiella Dot/Icm type IVB secretion system translocated effector

VFG002033(gb|WP\_010874498) (*p1/MgPa/gapA*) ADP1\_MYCPN adhesin P1 [Cytadherence organelle (VF033

VFG000147(gb|NP\_252530) (*exoS*) type III secretion system effector ExoS, ADP ribosyltransferase activity and

VFG050699(gb|WP\_000840548.1) (*pilR*) sigma-54 dependent transcriptional regulator [TFP (VF1334) - Adheren

VFG002047(gb|WP\_000498818) (*gspD*) general secretion pathway protein D [T2SS (VF0333) - Effector delivery

VFG044324(gb|WP\_032447693) (*ybtX*) yersiniabactin-associated zinc MFS transporter YbtX [Ybt (VF0564) - N

VFG038727(gb|WP\_011705295) (*cheW*) chemotaxis protein CheW [Polar flagella (VF0473) - Motility (VFC020

VFG005197(gb|WP\_000006706) (*pavA*) Fibronectin-binding protein-like protein A [PavA (VF0283) - Adherenc

VFG048621(gb|WP\_004213924) (*iutA*) ferric aerobactin receptor IutA [Aerobactin (VF0565) - Nutritional/Metal

VFG038671(gb|WP\_011705282) (*fliQ*) flagellar biosynthetic protein FliQ [Polar flagella (VF0473) - Motility (V

VFG044165(gb|WP\_001041793) (*entS*) enterobactin exporter, iron-regulated [Enterobactin (VF0228) - Nutrition

VFG043773(gb|YP\_398516) (*bont*) botulinum neurotoxin, BoNT [BoNT (VF0375) - Exotoxin (VFC0235)] [Clos

VFG049147(gb|WP\_001217110) (*clbA*) colibactin biosynthesis phosphopantetheinyl transferase ClbA [Colibacti

VFG041031(gb|NP\_251049) (PA2359) transcriptional regulator [HSI-3 (VF0944) - Effector delivery system (VF

VFG043775(gb|BAB86845) (*bont*) botulinum neurotoxin, BoNT [BoNT (VF0375) - Exotoxin (VFC0235)] [Clos

VFG038501(gb|WP\_043119142) (*tapV*) type IV pilus assembly protein TapV [Tap type IV pili (VF0475) - Adhe

VFG038265(gb|WP\_016352108) (*exeB*) general secretion pathway protein B [Exe T2SS (VF0478) - Effector del

VFG001213(gb|NP\_253236) (*pilS*) two-component sensor PilS [Type IV pili (VF0082) - Adherence (VFC0001)]

VFG038868(gb|WP\_005314282) (*lfiJ*) lateral flagellar protein, LfiJ [Lateral flagella (VF0474) - Motility (VFC02

VFG002502(gb|WP\_004523066) (fliF) flagellar M-ring protein FliF [Flagella (VF0430) - Motility (VFC0204)] [

VFG038405(gb|WP\_011705727) (AHA\_RS09305) type VI secretion system PAAR protein [T6SS (VF0480) - E

VFG041033(gb|NP\_251051) (PA2361) hypothetical protein [HSI-3 (VF0944) - Effector delivery system (VFC00

VFG049900 (tssM) Type VI secretion system protein TssM [T6SS (VF0579) - Effector delivery system (VFC008

VFG001227(gb|NP\_249101) (pilI) twitching motility protein PilI [Type IV pili (VF0082) - Adherence (VFC0001

VFG045527(gb|WP\_010947280) (ravY) Dot/Icm type IV secretion system effector RavY [Dot/Icm T4SS secre

VFG001408(gb|NP\_217456) (mas) multifunctional mycocerosic acid synthase [PDIM (VF0309) - Immune modu

VFG051244(gb|WP\_004683766.1) (BPE043) type IV secretion system effector [T4SS secreted effectors (VF069

VFG015527(gb|NP\_250591) (phzB2) phenazine biosynthesis protein PhzB [Pyocyanin (VF0100) - Nutritional/M

VFG038374(gb|WP\_011705709) (atsB) Type VI secretion system protein [T6SS (VF0480) - Effector delivery sy

VFG000874(gb|WP\_000824100) (fimI) Fimbrin-like protein fimI precursor [Type 1 fimbriae (VF0221) - Adhere

VFG038651(gb|WP\_011705278) (fliL) flagellar basal body-associated protein FliL [Polar flagella (VF0473) - M

VFG000616(gb|NP\_709455) (iucB) aerobactin synthesis protein IucB [Aerobactin (VF0123) - Nutritional/Metab

VFG038293(gb|WP\_016349340) (exel) general secretion pathway protein I [Exe T2SS (VF0478) - Effector deliv

VFG037028(gb|WP\_002218620) (katA) catalase [KatA (VF0454) - Stress survival (VFC0282)] [Neisseria menin

VFG000364(gb|WP\_000140406) (ybtA) transcriptional regulator YbtA [Yersiniabactin (VF0136) - Nutritional/M

VFG038407(gb|WP\_011705728) (vgrG3) VgrG protein [T6SS (VF0480) - Effector delivery system (VFC0086)]

VFG000931(gb|WP\_001336900) (entC) isochorismate synthase 1 [Enterobactin (VF0228) - Nutritional/Metaboli

VFG048808(gb|WP\_004899416) (rfbK1) O9 family phosphomannomutase RfbK1 [Capsule (VF0560) - Immune

VFG000363(gb|WP\_002212775) (irp2) yersiniabactin biosynthetic protein Irp2 [Yersiniabactin (VF0136) - Nutri

VFG038627(gb|WP\_016350050) (fliF) flagellar MS-ring protein [Polar flagella (VF0473) - Motility (VFC0204)]

VFG013260(gb|WP\_010868968) (lgtC) glycosyltransferase [LOS (VF0044) - Immune modulation (VFC0258)] [

VFG044326(gb|WP\_001327262) (ybtP) yersiniabactin ABC transporter ATP-binding/permease protein YbtP [Y

VFG000181(gb|NP\_251792) (xcpS) general secretion pathway protein F [Xcp secretion system (VF0084) - Effe

VFG002531(gb|WP\_011205291) (cheA) chemotaxis two-component sensor kinase CheA [Flagella (VF0430) - M

VFG040864(gb|WP\_001172770) (essC) type VII secretion system protein EssC [T7SS (VF0581) - Effector deliv

VFG046853(gb|WP\_003029539) (waaY) hypothetical protein [Capsule (VF0543) - Immune modulation (VFC02

VFG048257(gb|WP\_004174507) (fimI) type 1 pilus biosynthesis fimbrial protein [Type I fimbriae (VF0566) - A

VFG045818(gb|WP\_001528154) (tsh) temperature-sensitive protein Tsh [Tsh (VF0233) - Effector delivery syste

VFG038380(gb|WP\_043163044) (vipB) Type VI secretion system contractile sheath large subunit TssC/VipB [T

VFG048885(gb|WP\_014907227) (gmd) GDP-mannose 4,6-dehydratase [Capsule (VF0560) - Immune modulation

VFG002517(gb|WP\_004203463) (flgK) flagellar hook-associated protein 1 FlgK [Flagella (VF0430) - Motility (

VFG045792(gb|WP\_000791650) (csgB) curlin minor subunit CsgB [Curli fibers (VF1138) - Adherence (VFC00

VFG013292(gb|WP\_105163174) (lic3A) alpha-2,3-sialyltransferase [LOS (VF0044) - Immune modulation (VFC

VFG002046(gb|WP\_000135089) (gspC) general secretion pathway protein C [T2SS (VF0333) - Effector delivery

VFG012327(gb|WP\_011076307) (sfaC) S fimbrial switch regulatory protein SfaC [S fimbriae (VF0222) - Adhere

VFG038635(gb|WP\_016350051) (fliH) flagellar assembly protein FliH [Polar flagella (VF0473) - Motility (VFC

VFG015859(gb|NP\_252177) (pldA) phospholipase D [HSI-2 T6SS secreted effectors (VF0915) - Effector deliv

VFG038596(gb|WP\_016349157) (mshM) membrane protein with ATPase domain, GspA-like [MSHA type IV pi

VFG002389(gb|NP\_218396) (espK) ESX-1 type VII secretion system EspK [ESX-1 (VF0315) - Effector delivery

VFG048030(gb|WP\_003022143) (pdpC) Type VI secretion system secreted protein PdpC [T6SS (VF0544) - Effe

VFG038876(gb|WP\_005314259) (lfgG) lateral flagellar basal-body rod protein LfgG [Lateral flagella (VF0474) -

VFG038600(gb|WP\_016349156) (mshL) MSHA (mannose-sensitive hemagglutinin) pili biogenesis protein Mshl

VFG038683(gb|WP\_016350056) (flhA) flagellar biosynthesis protein FlhA [Polar flagella (VF0473) - Motility (

VFG049118(gb|WP\_012737529) (allR) DNA-binding transcriptional repressor AllR [Allantion utilization (VF05

VFG049910(gb|WP\_000348788) (tssG) Type VI secretion system protein TssG [T6SS (VF0579) - Effector deliv

VFG038448(gb|WP\_016351632) (tapN) type IV pilus biogenesis protein PilN [Tap type IV pili (VF0475) - Adherence (VFC0001)] [Enterobacteriaceae]

VFG000923(gb|WP\_001034892) (fepA) ferrienterobactin outer membrane transporter [Enterobactin (VF0228) - Nutritional/Metabolic factors (VFC0001)] [Enterobacteriaceae]

VFG038402(gb|WP\_011705725) (vasK/icmF) Type VI secretion system protein [T6SS (VF0480) - Effector delivery system (VFC0001)] [Enterobacteriaceae]

VFG000123(gb|NP\_252231) (alg8) alginate-c5-mannuronan-epimerase AlgG [Alginate (VF0091) - Biofilm (VFC0001)] [Enterobacteriaceae]

VFG049150(gb|WP\_000982270) (clbD) colibactin biosynthesis dehydrogenase ClbD [Colibactin (VF0573) - Excretion (VFC0001)] [Enterobacteriaceae]

VFG038476(gb|WP\_016349433) (tppA) type IV pilus pseudopilin [Tap type IV pili (VF0475) - Adherence (VFC0001)] [Enterobacteriaceae]

VFG000368(gb|WP\_000703040) (ybtS) salicylate synthase Irp9 [Yersiniabactin (VF0136) - Nutritional/Metabolic factors (VFC0001)] [Yersiniaceae]

VFG000930(gb|WP\_000077767) (entF) enterobactin synthase multienzyme complex component, ATP-dependent [Enterobactin (VF0228) - Nutritional/Metabolic factors (VFC0001)] [Enterobacteriaceae]

VFG034875(gb|WP\_001270087) (espX5) Type III secretion system effector EspX5 [TTSS secreted effectors (VF094) - Effector delivery system (VFC0001)] [Enterobacteriaceae]

VFG045794(gb|WP\_000992818) (csgC) curli assembly protein CsgC [Curli fibers (VF1138) - Adherence (VFC0001)] [Enterobacteriaceae]

VFG002072(gb|NP\_248776) (hsiE1) type VI secretion system hcp secretion island protein HsiE1, interacting with Hcp [T6SS (VF0480) - Effector delivery system (VFC0001)] [Enterobacteriaceae]

VFG000474(gb|NP\_460200) (phoQ) sensor protein PhoQ [PhoPQ (VF0111) - Regulation (VFC0301)] [Salmoneellae]

VFG000879(gb|WP\_000832235) (fimH) FimH protein precursor [Type 1 fimbriae (VF0221) - Adherence (VFC0001)] [Enterobacteriaceae]

VFG050757(gb|WP\_001166319.1) (gspE1) general secretion pathway protein E [T2SS (VF1335) - Effector delivery system (VFC0001)] [Enterobacteriaceae]

VFG044084(gb|NP\_251073) (PA2383) transcriptional regulator [Pyoverdine (VF0094) - Nutritional/Metabolic factors (VFC0001)] [Pseudomonadaceae]

VFG044323(gb|WP\_015874960) (ybtS) yersiniabactin biosynthesis salicylate synthase YbtS [Ybt (VF0564) - Nutritional/Metabolic factors (VFC0001)] [Yersiniaceae]

VFG038393(gb|WP\_010634228) (dotU) Type VI secretion system protein DotU [T6SS (VF0480) - Effector delivery system (VFC0001)] [Enterobacteriaceae]

VFG003997(gb|NP\_461706) (pipB2) type III secretion system effector PipB3 [TTSS-2 secreted effectors (VF094) - Effector delivery system (VFC0001)] [Enterobacteriaceae]

VFG038603(gb|WP\_016349155) (mshK) MSHA (mannose-sensitive hemagglutinin) pili biogenesis protein MshK [MSHA pili (VF0515) - Adherence (VFC0001)] [Yersiniaceae]

VFG001221(gb|NP\_253730) (pilN) type IV pilus inner membrane platform protein PilN [Type IV pili (VF0082) - Adherence (VFC0001)] [Enterobacteriaceae]

VFG034754(gb|WP\_000081129) (espL1) Type III secretion system effector espL1 [TTSS secreted effectors (VF094) - Effector delivery system (VFC0001)] [Enterobacteriaceae]

VFG034895(gb|WP\_001304001) (espY1) Type III secretion system effector EspY1 [TTSS secreted effectors (VF094) - Effector delivery system (VFC0001)] [Enterobacteriaceae]

VFG038824(gb|WP\_011706648) (flgM) anti-sigma-D factor [Polar flagella (VF0473) - Motility (VFC0204)] [Aeromonadaceae]

VFG006349(gb|WP\_000542818) (sabB/hopO) outer membrane protein adhesin [SabA (VF0055) - Adherence (VFC0001)] [Enterobacteriaceae]

VFG013647(gb|WP\_041175806) (invC/ilp) intimin-like invasin C protein [Invasin C/Ilp (VF0575) - Invasion (VFC0001)] [Enterobacteriaceae]

VFG000926(gb|WP\_001443194) (fepD) ferrienterobactin ABC transporter permease [Enterobactin (VF0228) - Nutritional/Metabolic factors (VFC0001)] [Enterobacteriaceae]

VFG000944(gb|AAK16477) (draC) usher protein DraC [Dr adhesins (VF0223) - Adherence (VFC0001)] [Escherichiaceae]

VFG038828(gb|WP\_011706649) (flgN) flagellar protein FlgN [Polar flagella (VF0473) - Motility (VFC0204)] [Aeromonadaceae]

VFG044172(gb|WP\_000622316) (chuV) ATP-binding hydrophilic protein ChuV [Chu (VF0227) - Nutritional/Metabolic factors (VFC0001)] [Enterococcaceae]

VFG002194(gb|WP\_011109506) (fsrA) response regulator [Fsr (VF0360) - Biofilm (VFC0271)] [Enterococcus faecalis]

VFG012865 (ipaH) invasion plasmid antigen IpaH [TTSS secreted effectors (VF0978) - Effector delivery system (VFC0001)] [Enterobacteriaceae]

VFG002136(gb|NP\_220093) (copB) Type III secretion system translocator CopB [TTSS (VF0344) - Effector delivery system (VFC0001)] [Enterobacteriaceae]

VFG000903(gb|WP\_001045652) (pic) Pic serine protease precursor, autotransporter [Pic (VF0232) - Effector delivery system (VFC0001)] [Enterobacteriaceae]

VFG002049(gb|WP\_001173470) (gspF) general secretion pathway protein F [T2SS (VF0333) - Effector delivery system (VFC0001)] [Enterobacteriaceae]

VFG038375(gb|WP\_011705710) (atsC) Type VI secretion system protein [T6SS (VF0480) - Effector delivery system (VFC0001)] [Enterobacteriaceae]

VFG045326(gb|WP\_010947454) (LPG\_RS08655) DUF1189 family protein [PmiA (VF0162) - Others (VFC034) - Effector delivery system (VFC0001)] [Enterobacteriaceae]

VFG006962(gb|WP\_001122154) (mshE) MSHA biogenesis protein MshE [MSHA pili (VF0515) - Adherence (VFC0001)] [Yersiniaceae]

VFG038631(gb|WP\_011705273) (fliG) flagellar motor switch protein G [Polar flagella (VF0473) - Motility (VFC0204)] [Aeromonadaceae]

VFG002489(gb|WP\_181937968) (tssM-5) Type VI secretion system protein TssM [T6SS-1 (VF0429) - Effector delivery system (VFC0001)] [Enterobacteriaceae]

VFG048488(gb|WP\_002893737) (fepC) iron-enterobactin transporter ATP-binding protein [Ent (VF0562) - Nutritional/Metabolic factors (VFC0001)] [Enterobacteriaceae]

VFG002084(gb|WP\_000619136) (clpB/vasG) type VI secretion system AAA+ family ATPase [VAS T6SS (VF0480) - Effector delivery system (VFC0001)] [Enterobacteriaceae]

VFG044329(gb|WP\_015874964) (irp1) yersiniabactin polyketide synthase HMWP1 [Ybt (VF0564) - Nutritional/Metabolic factors (VFC0001)] [Yersiniaceae]

VFG048687(gb|WP\_002902160) (hcp/tssD) type VI secretion system protein, Hcp family [T6SS (VF0569) - Effector delivery system (VFC0001)] [Enterobacteriaceae]

VFG000885(gb|WP\_000265729) (papD) chaperone protein PapD [P fimbriae (VF0220) - Adherence (VFC0001)] [Enterobacteriaceae]

VFG000939(gb|WP\_001287497) (iucB) aerobactin siderophore biosynthesis protein IucB [Aerobactin (VF0229) - Nutritional/Metabolic factors (VFC0001)] [Aeromonadaceae]

VFG045387(gb|WP\_011451394) (APH\_RS05670) P44/Msp2 family outer membrane protein [P44/Msp2 family (VF045387) - Adherence (VFC0001)] [Aeromonadaceae]



VFG002306(gb|NP\_461449) (ratB) putative outer membrane protein [RatB (VF0399) - Adherence (VFC0001)] [

VFG051131(gb|WP\_006191504.1) (bmaC) autotransporter outer membrane beta-barrel domain-containing protei

VFG045793(gb|WP\_000771429) (csgA) curlin major subunit CsgA [Curli fibers (VF1138) - Adherence (VFC00

VFG050625(gb|WP\_000389061.1) (pilG) twitching motility response regulator PilG [TFP (VF1334) - Adherence

VFG048797(gb|WP\_004175261) (ugd) UDP-glucose 6-dehydrogenase [Capsule (VF0560) - Immune modulation

VFG000916(gb|WP\_001017192) (chuS) heme oxygenase ChuS [Chu (VF0227) - Nutritional/Metabolic factor (V

VFG041018(gb|NP\_250351) (PA1660) hypothetical protein [HSI-2 (VF0943) - Effector delivery system (VFC00

VFG001235(gb|NP\_249108) (chpE) probable chemotaxis protein [Type IV pili (VF0082) - Adherence (VFC0001

VFG001242(gb|NP\_249775) (flgI) flagellar P-ring protein precursor FlgI [Flagella (VF0273) - Motility (VFC020

VFG000210(gb|NP\_250406) (pscB) type III secretion system protein PscB [TTSS (VF0083) - Effector delivery s

VFG038105(gb|WP\_000591436) (galU) UTP--glucose-1-phosphate uridylyltransferase GalU [Capsule (VF0465)

VFG000261(gb|WP\_002225480) (iga) IgA-specific serine endopeptidase [IgA1 protease (VF0080) - Effector del

VFG013063(gb|WP\_001017208) (shuS) heme/hemoglobin transport protein ShuS [Shu (VF0256) - Nutritional/M

VFG034756 (espL1) Type III secretion system effector espL1 [TTSS secreted effectors (VF1111) - Effector deliv

VFG002282(gb|WP\_041707714) (cloSI) alpha-clostripain [Alpha-clostripain (VF0390) - Exoenzyme (VFC0251)

VFG013069(gb|WP\_005019013) (shuU) permease of iron compound ABC transport system [Shu (VF0256) - Nu

VFG050372(gb|WP\_001017033.1) (pilQ) type IV pilus secretin PilQ [TFP (VF1334) - Adherence (VFC0001)] [A

VFG050386(gb|WP\_000355489.1) (pilT) type IV pilus twitching motility protein PilT [TFP (VF1334) - Adheren

VFG002233(gb|WP\_011181129) (virB4) type IV secretion system virB4 protein homolog [VirB/VirD4 type IV s

VFG015524(gb|NP\_250590) (phzA2) phenazine biosynthesis protein PhzA [Pyocyanin (VF0100) - Nutritional/M

VFG000884(gb|WP\_000654937) (papC) usher protein PapC [P fimbriae (VF0220) - Adherence (VFC0001)] [Esc

VFG034873(gb|WP\_001270084) (espX5) Type III secretion system effector EspX5 [TTSS secreted effectors (VF

VFG038389(gb|WP\_011705718) (atsK) Type VI secretion system protein [T6SS (VF0480) - Effector delivery sy

VFG002436(gb|WP\_080341181) (boaA) surface-exposed protein, autotransporter [BoaA (VF0434) - Adherence

VFG050670(gb|WP\_000505931.1) (pilJ) methyl-accepting chemotaxis protein [TFP (VF1334) - Adherence (VFC

VFG041020(gb|NP\_250353) (PA1662) ClpA/B-type protease [HSI-2 (VF0943) - Effector delivery system (VFC

VFG000119(gb|NP\_253948) (algR) alginate biosynthesis regulatory protein AlgR [Alginate (VF0091) - Biofilm

VFG001223(gb|NP\_249086) (pilT) twitching motility protein PilT [Type IV pili (VF0082) - Adherence (VFC000

VFG014733(gb|NP\_252216) (motY) probable outer membrane protein precursor [Flagella (VF0273) - Motility (V

VFG038403(gb|WP\_011705726) (atsS) Type VI secretion system protein [T6SS (VF0480) - Effector delivery sy

VFG013265(gb|WP\_005694045) (orfM) deoxyribonucleotide triphosphate pyrophosphatase [LOS (VF0044) - Im

VFG038517(gb|WP\_016350156) (flpJ) Flp pilus pseudopilin [Flp type IV pili (VF0476) - Adherence (VFC0001)

VFG001900(gb|YP\_002343773) (flhB) flagellar biosynthetic protein [Flagella (VF0114) - Motility (VFC0204)] [

VFG048459(gb|WP\_004147525) (entS) enterobactin exporter EntS [Ent (VF0562) - Nutritional/Metabolic factor

VFG034772(gb|WP\_000627910) (espL4) Type III secretion system effector EspL4 [TTSS secreted effectors (VF

VFG044325(gb|WP\_002212761) (ybtQ) yersiniabactin ABC transporter ATP-binding/permease protein YbtQ [Y

VFG048830(gb|WP\_014907233) (gndA) NADP-dependent phosphogluconate dehydrogenase [Capsule (VF0560)

VFG045475(gb|WP\_010945770) (LPG\_RS00040) hypothetical protein [Dot/Icm T4SS secreted effectors (VF079

VFG041015(gb|NP\_250348) (PA1657) hypothetical protein [HSI-2 (VF0943) - Effector delivery system (VFC00

VFG041267(gb|WP\_010946879) (lem7) Dot/Icm type IV secretion system effector Lem7 [Dot/Icm T4SS secre

VFG002278(gb|WP\_011010095) (nagI) hyaluronidase [Mu-toxin (VF0389) - Exoenzyme (VFC0251)] [Clostridi

VFG037777(gb|WP\_000867091) (lpsB) glycosyltransferase family 4 protein [LPS (VF0466) - Immune modulat

VFG001811(gb|YP\_177694) (fbpC) Secreted antigen 85-C FbpC (85C) (antigen 85 complex C) (AG58C) (myco

VFG044327(gb|WP\_000140406) (ybtA) yersiniabactin transcriptional regulator YbtA [Ybt (VF0564) - Nutrition

VFG038788(gb|WP\_011706639) (flgG) flagellar basal body rod protein FlgG [Polar flagella (VF0473) - Motility

VFG041305(gb|WP\_010947679) (pieA/lirC) Dot/Icm type IV secretion system effector PieA/LirC [Dot/Icm T4SS

VFG048755(gb|WP\_049127998) (icmF/tssM) type VI secretion protein TssM [T6SS (VF0569) - Effector delivery system (VFC0001)] [Bordetella pertussis (VF0027)]

VFG000310(gb|WP\_001201399) (pseFG) CMP-N-acetylneuraminic acid synthetase [Flagellar glycosylation/Pseudomonas aeruginosa (VF0560) - Immune modulation (VFC0251)]

VFG048990(gb|WP\_001741945) (galF) GalU regulator GalF [Capsule (VF0560) - Immune modulation (VFC0251)]

VFG000002(gb|WP\_010930159) (prn) pertactin precursor [Pertactin (VF0027) - Adherence (VFC0001)] [Bordetella pertussis (VF0027)]

VFG000889(gb|WP\_000113351) (papF) P pilus minor subunit PapF [P fimbriae (VF0220) - Adherence (VFC0001)]

VFG044159(gb|WP\_000125846) (fes) enterobactin/ferric enterobactin esterase [Enterobactin (VF0228) - Nutritional/Metabolic factors (VFC0251)]

VFG000890(gb|WP\_000758683) (papG) P pilus tip adhesin PapG [P fimbriae (VF0220) - Adherence (VFC0001)]

VFG000079(gb|NP\_463763) (clpC) endopeptidase Clp ATP-binding chain C [ClpC (VF0072) - Stress survival (VFC0001)]

VFG038399(gb|WP\_011705723) (atsP) Type VI secretion system protein [T6SS (VF0480) - Effector delivery system (VFC0001)]

VFG015973(gb|NP\_251082) (pvdP) tyrosinase required for pyoverdine maturation [Pyoverdine (VF0094) - Nutritional/Metabolic factors (VFC0251)]

VFG050212(gb|WP\_011861707) (CD2831) SrtB-anchored collagen-binding adhesin [CD2831 (VF0598) - Adherence (VFC0001)]

VFG015521(gb|NP\_252906) (phzG1) phenazine biosynthesis protein PhzG, pyridoxamine 5'-phosphate oxidase [Phenazine (VF0560) - Immune modulation (VFC0251)]

VFG038376(gb|WP\_164927604) (atsD) Type VI secretion system protein [T6SS (VF0480) - Effector delivery system (VFC0001)]

VFG014642(gb|NP\_252040) (flgA) flagellar basal body P-ring biosynthesis protein FlgA [Flagella (VF0273) - Motility (VFC0251)]

VFG011631(gb|WP\_004684547) (bvrS) stimulus-sensing domain-containing protein [BvrR-BvrS (VF0368) - Regulation (VFC0001)]

VFG038091(gb|WP\_000826956) (ACICU\_RS00475) sugar transferase [Capsule (VF0465) - Immune modulation (VFC0251)]

VFG049073(gb|WP\_015875021) (KP1\_RS17240) DUF4422 domain-containing protein [LPS (VF0561) - Immune modulation (VFC0251)]

VFG000360(gb|WP\_002212799) (ybtT) type II thioesterase YbtT [Yersiniabactin (VF0136) - Nutritional/Metabolic factors (VFC0251)]

VFG000211(gb|NP\_250407) (pscC) type III secretion system secretin PscC [TTSS (VF0083) - Effector delivery system (VFC0001)]

VFG002068(gb|NP\_248772) (hsiA1) type VI secretion system hcp secretion island protein HsiA1 [HSI-I (VF0333) - Effector delivery system (VFC0001)]

VFG012501(gb|WP\_000271272) (iroE) esterase [Salmochelin siderophore (VF0230) - Nutritional/Metabolic factors (VFC0251)]

VFG042978(gb|WP\_011109477) (ebpC) endocarditis and biofilm-associated pilus major subunit EbpC [Ebp pili (VF0560) - Adherence (VFC0001)]

VFG048498(gb|WP\_012737619) (entF) enterobactin synthase subunit F [Ent (VF0562) - Nutritional/Metabolic factors (VFC0251)]

VFG038667(gb|WP\_016350054) (fliP) flagellar biosynthesis protein FliP [Polar flagella (VF0473) - Motility (VFC0251)]

VFG002276(gb|WP\_011009653) (colA) collagenase [Kappa-toxin (VF0388) - Exoenzyme (VFC0251)] [Clostridium perfringens (VF0388)]

VFG000875(gb|WP\_000066579) (fimC) Chaperone protein fimC precursor [Type 1 fimbriae (VF0221) - Adherence (VFC0001)]

VFG002101(gb|WP\_010948213) (sidC) Dot/Icm type IV secretion system effector SidC, ER interactor [Dot/Icm (VF0221) - Effector delivery system (VFC0001)]

VFG000150(gb|NP\_250881) (exoY) type III secretion system effector ExoY, adenylate cyclase [TTSS secreted effectors (VF0083) - Effector delivery system (VFC0001)]

VFG012627(gb|WP\_000910392) (chuU) heme permease protein ChuU [Chu (VF0234) - Nutritional/Metabolic factors (VFC0251)]

VFG049162(gb|WP\_002430641) (clbP) precolibactin peptidase ClbP [Colibactin (VF0573) - Exotoxin (VFC0235)]

VFG049124(gb|WP\_012737540) (allD) ureidoglycolate dehydrogenase [Allantoin utilization (VF0572) - Nutritional/Metabolic factors (VFC0251)]

VFG002052(gb|WP\_000820136) (gspI) general secretion pathway protein I [T2SS (VF0333) - Effector delivery system (VFC0001)]

VFG001245(gb|NP\_249778) (flgL) flagellar hook-associated protein 3 FlgL [Flagella (VF0273) - Motility (VFC0251)]

VFG048277(gb|WP\_009308599) (fimD) outer membrane usher protein [Type I fimbriae (VF0566) - Adherence (VFC0001)]

VFG000333(gb|WP\_005694147) (lic2A) glycosyltransferase [LOS (VF0044) - Immune modulation (VFC0251)]

VFG034831(gb|WP\_000484243) (espR4) Type III secretion system effector espR4 [TTSS secreted effectors (VF0083) - Effector delivery system (VFC0001)]

VFG000144(gb|NP\_249940) (aprA) alkaline metalloproteinase precursor [Alkaline protease (VF0090) - Exoenzyme (VFC0251)]

VFG000907(gb|WP\_000376545) (hlyB) Hemolysin B [-Hemolysin (VF0225) - Exotoxin (VFC0235)] [Escherichia coli (VF0225)]

VFG000264(gb|WP\_002247545) (lbpA) lactoferrin-binding protein A [Lbp (VF0047) - Nutritional/Metabolic factors (VFC0251)]

VFG044333(gb|WP\_015874968) (fyuA) yersiniabactin receptor FyuA [Ybt (VF0564) - Nutritional/Metabolic factors (VFC0251)]

VFG048985(gb|WP\_014907219) (KP1\_RS17355) phosphatase PAP2 family protein [Capsule (VF0560) - Immune modulation (VFC0251)]

VFG002166(gb|WP\_010714416) (ace) collagen adhesin protein [Ace (VF0355) - Adherence (VFC0001)] [Enterobacteriaceae (VF0355)]

VFG002300(gb|CAA88565) (tcnA) alpha-toxin [Alpha-toxin (novyi) (VF0386) - Exotoxin (VFC0235)] [Clostridium novyi (VF0386)]

VFG002184(gb|WP\_002359685) (cpsG) MurB family protein [Capsule (VF0361) - Immune modulation (VFC0251)]

VFG044328(gb|WP\_015874963) (irp2) yersiniabactin non-ribosomal peptide synthetase HMWP2 [Ybt (VF0564) - Nutritional/Metabolic factors (VFC0251)]

VFG043624(gb|WP\_004149659) (mrkD) fimbrial adhesin protein precursor MrkD [Type 3 fimbriae (VF0567) - Adherence (VFC0001)]

VFG038395(gb|WP\_011705721) (clpB) type VI secretion system ATPase ClpV1 [T6SS (VF0480) - Effector deli  
VFG038679(gb|WP\_016350055) (flhB) flagellar biosynthetic protein FlhB [Polar flagella (VF0473) - Motility (V  
VFG001248(gb|NP\_249788) (fleQ) transcriptional regulator FleQ [Flagella (VF0273) - Motility (VFC0204)] [Ps  
VFG043626(gb|WP\_000820818) (mrkB) fimbrial chaperone protein mrkB precursor [Type 3 fimbriae (VF0567)  
VFG001256(gb|NP\_250134) (fliM) flagellar motor switch protein FliM [Flagella (VF0273) - Motility (VFC0204  
VFG002048(gb|WP\_000249362) (gspE) general secretion pathway protein E [T2SS (VF0333) - Effector delivery  
VFG038460(gb|WP\_043119325) (tapQ) type IV pilus secretin PilQ [Tap type IV pili (VF0475) - Adherence (VF  
VFG037912(gb|WP\_000939040) (pseB) UDP-N-acetylglucosamine 4,6-dehydratase (inverting) [Capsule (VF046  
VFG048665(gb|WP\_004176431) (dotU/tssL) type VI secretion system protein, DotU/TssL family [T6SS (VF056  
VFG048676(gb|WP\_014907726) (ompA) OmpA family protein [T6SS (VF0569) - Effector delivery system (VFC  
VFG034901(gb|WP\_000868321) (espY2) Type III secretion system effector EspY2 [TTSS secreted effectors (VF  
VFG051134(gb|WP\_002969669.1) (btaE) Trimeric autotransporter adhesin, YadA-like family protein [BtaE (VF  
VFG049902(gb|WP\_011310140) (tssM) Type VI secretion system protein TssM [T6SS (VF0579) - Effector deliv  
VFG048439(gb|WP\_014907941) (entC) isochorismate synthase [Ent (VF0562) - Nutritional/Metabolic factor (VF  
VFG044096(gb|NP\_252908) (PA4218) transporter [Pyochelin (VF0095) - Nutritional/Metabolic factor (VFC027  
VFG038509(gb|WP\_016350158) (flpL) Flp pilus pseudopilin [Flp type IV pili (VF0476) - Adherence (VFC0001  
VFG041026(gb|NP\_250359) (PA1668) hypothetical protein [HSI-2 (VF0943) - Effector delivery system (VFC00  
VFG001259(gb|NP\_250137) (fliP) flagellar biosynthetic protein FliP [Flagella (VF0273) - Motility (VFC0204)] [P  
VFG001270(gb|WP\_010929997) (cyaD) cyclolysin secretion protein [Cya (VF0028) - Exotoxin (VFC0235)] [Bo  
VFG002197(gb|WP\_002387027) (bopD) sugar-binding transcriptional regulator, LacI family [BopD (VF0362) -  
VFG000141(gb|NP\_253675) (waaA) lipopolysaccharide core biosynthesis protein WaaP [LPS (VF0085) - Immun  
VFG000130(gb|NP\_252238) (algI) alginate o-acetyltransferase AlgI [Alginate (VF0091) - Biofilm (VFC0271)] [P  
VFG002500(gb|WP\_004556525) (fliH) flagellar assembly protein H [Flagella (VF0430) - Motility (VFC0204)] [P  
VFG002220(gb|WP\_004686741) (pgm) phosphoglucomutase [LPS (VF0367) - Immune modulation (VFC0258)] [P  
VFG037837(gb|WP\_000868104) (lpxD) UDP-3-O-(3-hydroxymyristoyl)glucosamine N-acyltransferase [LPS (V  
VFG049914(gb|WP\_000037389) (tssB) Type VI secretion system protein TssB [T6SS (VF0579) - Effector delive  
VFG038584(gb|WP\_016349161) (mshF) hypothetical protein [MSHA type IV pili (VF0477) - Adherence (VFC0  
VFG038611(gb|WP\_016349153) (mshI1) MSHA (mannose-sensitive hemagglutinin) pili biogenesis protein Msh  
VFG000126(gb|NP\_252234) (algE) alginate biosynthetic protein AlgK precursor [Alginate (VF0091) - Biofilm (V  
VFG038409(gb|WP\_011704492) (fimA) fimbrial protein [Type I pili (VF0486) - Adherence (VFC0001)] [Aerom  
VFG006914(gb|WP\_000418747) (pilD/vcpD) A24 family peptidase [ChiRP (VF0609) - Adherence (VFC0001)] [P  
VFG000498(gb|NP\_460362) (sseA) chaperone for sseB and sseD [TTSS (SPI-2 encode) (VF0321) - Effector deli  
VFG002045(gb|WP\_010930608) (bvgS) virulence factors two-component system sensor histidine kinase BvgS [V  
VFG001229(gb|NP\_249103) (pilK) methyltransferase PilK [Type IV pili (VF0082) - Adherence (VFC0001)] [Ps  
VFG038313(gb|WP\_043118380) (exeN) general secretion pathway protein N [Exe T2SS (VF0478) - Effector del  
VFG038385(gb|WP\_011705716) (atsI) Type VI secretion system protein [T6SS (VF0480) - Effector delivery sys  
VFG000873(gb|WP\_000695571) (fimA) Type-1 fimbrial protein, A chain precursor [Type 1 fimbriae (VF0221) -  
VFG048327(gb|WP\_004152886) (mrkH) transcriptional activator [Type 3 fimbriae (VF0567) - Biofilm (VFC027  
VFG034624(gb|WP\_000755097) (cfaB) colonization factor antigen 1 [Adhesive fimbriae (VF0213) - Adherence  
VFG001214(gb|NP\_253237) (pilR) two-component response regulator PilR [Type IV pili (VF0082) - Adherence  
VFG043624(gb|WP\_004149659) (mrkD) fimbrial adhesin protein precursor MrkD [Type 3 fimbriae (VF0567) - I  
VFG001288(gb|WP\_000723836) (icaC) intercellular adhesion protein C, involved in polysaccharide intercellular  
VFG048697(gb|WP\_015874721) (clpV/tssH) type VI secretion system ATPase TssH [T6SS (VF0569) - Effector  
VFG000109(gb|WP\_000021616) (zot) zona occludens toxin [Zot (VF0129) - Exotoxin (VFC0235)] [Vibrio chol  
VFG000115(gb|NP\_249839) (toxA) exotoxin A precursor [ExoA (VF0086) - Exotoxin (VFC0235)] [Pseudomon  
VFG001938(gb|YP\_002344530) (Cj1137c) glycosyltransferase [LOS (VF0326) - Immune modulation (VFC0258

VFG038364(gb|WP\_005320615) (aexT) Type III secretion system effector AexT, bifunctional toxin with GTPase  
VFG002076(gb|NP\_248780) (clpV1) type VI secretion system AAA+ family ATPase [HSI-I (VF0334) - Effector  
VFG038820(gb|WP\_161785096) (flgA) flagella basal body P-ring formation protein FlgA [Polar flagella (VF047  
VFG048990(gb|WP\_001741945) (galF) GalU regulator GalF [Capsule (VF0560) - Immune modulation (VFC025  
VFG049122(gb|WP\_012737539) (allC) allantoin amidohydrolase [Allantoin utilization (VF0572) - Nutritional/M  
VFG038413(gb|WP\_043118350) (fimC) outer membrane usher protein [Type I pili (VF0486) - Adherence (VFC  
VFG044325(gb|WP\_002212761) (ybtQ) yersiniabactin ABC transporter ATP-binding/permease protein YbtQ [Y  
VFG038780(gb|WP\_011706637) (flgI) flagellar basal body P-ring protein [Polar flagella (VF0473) - Motility (V  
VFG049147(gb|WP\_001217110) (clbA) colibactin biosynthesis phosphopantetheinyl transferase ClbA [Colibacti  
VFG038346(gb|WP\_005320760) (acr1) Type III secretion system gatekeeper subunit [T3SS (VF0479) - Effector  
VFG014707(gb|NP\_250151) (motC) flagellar motor protein [Flagella (VF0273) - Motility (VFC0204)] [Pseudom  
VFG000923(gb|WP\_001034892) (fepA) ferrienterobactin outer membrane transporter [Enterobactin (VF0228) - I  
VFG038655(gb|WP\_011705279) (fliM) flagellar motor switch protein FliM [Polar flagella (VF0473) - Motility (V  
VFG038389(gb|WP\_011705718) (atsK) Type VI secretion system protein [T6SS (VF0480) - Effector delivery sy  
VFG000028(gb|WP\_003808614) (brkB) serum resistance protein [Brk (VF0034) - Immune modulation (VFC025  
VFG048600(gb|WP\_004213920) (iucA) aerobactin Synthetase IucA [Aerobactin (VF0565) - Nutritional/Metabol  
VFG002471(gb|WP\_004533443) (bprP) regulatory protein [Bsa T3SS (VF0428) - Effector delivery system (VFC  
VFG001444(gb|AAG10151) (aslA) putative arylsulfatase [AslA (VF0238) - Invasion (VFC0083)] [Escherichia c  
VFG002054(gb|WP\_000633233) (gspK) general secretion pathway protein K [T2SS (VF0333) - Effector delivery  
VFG038859(gb|WP\_005314301) (lfiR) lateral flagellar biosynthetic protein LfiR [Lateral flagella (VF0474) - Mo  
VFG014984(gb|NP\_253136) (algW) AlgW protein [Alginate (VF0091) - Biofilm (VFC0271)] [Pseudomonas aer  
VFG038888(gb|WP\_011898286) (lafS) LafS, RNA polymerase sigma factor [Lateral flagella (VF0474) - Motility  
VFG038261(gb|WP\_016352107) (exeA) general secretion pathway protein A [Exe T2SS (VF0478) - Effector del  
VFG049903(gb|WP\_001240533) (tssA) Type VI secretion system protein TssA [T6SS (VF0579) - Effector deliv  
VFG038600(gb|WP\_016349156) (mshL) MSHA (mannose-sensitive hemagglutinin) pili biogenesis protein MshL  
VFG038393(gb|WP\_010634228) (dotU) Type VI secretion system protein DotU [T6SS (VF0480) - Effector deliv  
VFG048819(gb|WP\_014907234) (KP1\_RS17280) mannose-1-phosphate guanylyltransferase/mannose-6-phosphat  
VFG044097(gb|NP\_252909) (PA4219) hypothetical protein [Pyochelin (VF0095) - Nutritional/Metabolic factor  
VFG045342(gb|WP\_002221634) (yapK) autotransporter protein YapK [YapK (VF0508) - Adherence (VFC0001  
VFG050212(gb|WP\_011861707) (CD2831) SrtB-anchored collagen-binding adhesin [CD2831 (VF0598) - Adher  
VFG041016(gb|NP\_250349) (PA1658) hypothetical protein [HSI-2 (VF0943) - Effector delivery system (VFC00  
VFG002305(gb|NP\_461448) (shdA) AIDA autotransporter-like protein [ShdA (VF0398) - Adherence (VFC0001  
VFG044165(gb|WP\_001041793) (entS) enterobactin exporter, iron-regulated [Enterobactin (VF0228) - Nutrition  
VFG048621(gb|WP\_004213924) (iutA) ferric aerobactin receptor IutA [Aerobactin (VF0565) - Nutritional/Metal  
VFG002172(gb|WP\_010710127) (EF0485) aggregation substance [AS (VF0352) - Adherence (VFC0001)] [Ente  
VFG001827(gb|WP\_001020414) (senB) enterotoxin [ShET2 (VF0258) - Exotoxin (VFC0235)] [Shigella boydii  
VFG038359(gb|WP\_005321607) (aopH) Type III secretion system effector AopH, putative tyrosine phosphatase  
VFG049007(gb|WP\_002911561) (rcsA) transcriptional activator for ctr capsule biosynthesis [RcsAB (VF0571) -  
VFG002055(gb|WP\_000097229) (gspL) general secretion pathway protein L [T2SS (VF0333) - Effector delivery  
VFG001405(gb|NP\_217219) (sigA/rpoV) RNA polymerase sigma factor SigA [SigA (VF0257) - Regulation (VF  
VFG000616(gb|NP\_709455) (iucB) aerobactin synthesis protein IucB [Aerobactin (VF0123) - Nutritional/Metab  
VFG013648(gb|WP\_012104486) (invD) invasin D protein [Invasin D (VF0576) - Invasion (VFC0083)] [Yersinia  
VFG002165(gb|WP\_002356954) (efaA) endocarditis specific antigen [EfaA (VF0354) - Adherence (VFC0001)]  
VFG048247(gb|WP\_002916190) (fimA) type 1 major fimbrial subunit precursor [Type I fimbriae (VF0566) - Ad  
VFG038792(gb|WP\_011706640) (flgF) flagellar basal-body rod protein FlgF [Polar flagella (VF0473) - Motility  
VFG014105(gb|NP\_251843) (wzx) O-antigen translocase [LPS (VF0085) - Immune modulation (VFC0258)] [Ps

VFG048654(gb|WP\_004224345) (*vasE/tssK*) type VI secretion system baseplate subunit TssK [T6SS (VF0569) - Effector delivery system (VFC008)] [Yersiniabactin (VF0136)]

VFG000359(gb|WP\_001088826) (*ybtE*) yersiniabactin siderophore biosynthetic protein [Yersiniabactin (VF0136)]

VFG038848(gb|WP\_016350360) (*flmD*) FlmD protein [Polar flagella (VF0473) - Motility (VFC0204)] [Aeromonas hydrophila (VF0473)]

VFG049900 (*tssM*) Type VI secretion system protein TssM [T6SS (VF0579) - Effector delivery system (VFC008)]

VFG048348(gb|WP\_004149658) (*mrkJ*) phosphodiesterase [Type 3 fimbriae (VF0567) - Biofilm (VFC0271)] [Klebsiella pneumoniae (VF0567)]

VFG001242(gb|NP\_249775) (*flgI*) flagellar P-ring protein precursor FlgI [Flagella (VF0273) - Motility (VFC0204)] [Pseudomonas aeruginosa (VF0273)]

VFG004906(gb|WP\_000778477) (*set25*) superantigen-like protein SSL10 [SSLs (VF0990) - Exotoxin (VFC0235)] [Yersinia enterocolitica (VF0990)]

VFG043518(gb|AAN12397) (*acm*) collagen adhesin precursor Acm [Acm (VF0419) - Adherence (VFC0001)] [Enterobacteriaceae (VF0419)]

VFG000122(gb|NP\_252230) (*algD*) GDP-mannose 6-dehydrogenase AlgD [Alginate (VF0091) - Biofilm (VFC0271)] [Pseudomonas aeruginosa (VF0091)]

VFG049160(gb|WP\_001327259) (*clbN*) colibactin non-ribosomal peptide synthetase ClbN [Colibactin (VF0573) - Exotoxin (VFC0235)] [Yersinia enterocolitica (VF0573)]

VFG045789(gb|WP\_001264082) (*cgsF*) curli production assembly/transport protein CsgF [Curli fibers (VF1138) - Biofilm (VFC0271)] [Yersinia enterocolitica (VF1138)]

VFG049902(gb|WP\_011310140) (*tssM*) Type VI secretion system protein TssM [T6SS (VF0579) - Effector delivery system (VFC008)]

VFG044328(gb|WP\_015874963) (*irp2*) yersiniabactin non-ribosomal peptide synthetase HMWP2 [Ybt (VF0564) - Exotoxin (VFC0235)] [Yersinia enterocolitica (VF0564)]

VFG000514(gb|NP\_460379) (*ssaV*) type III secretion system major export apparatus protein ssaV [TTSS (SPI-2) (VF0978) - Effector delivery system (VFC008)] [Yersinia enterocolitica (VF0978)]

VFG050115(gb|WP\_002081542) (*cesA*) Cereulide synthetase A, Cesa [Cereulide (VF0583) - Exotoxin (VFC0235)] [Bacillus cereus (VF0583)]

VFG001259(gb|NP\_250137) (*fliP*) flagellar biosynthetic protein FliP [Flagella (VF0273) - Motility (VFC0204)] [Pseudomonas aeruginosa (VF0273)]

VFG002525(gb|WP\_004185006) (*cheY*) chemotaxis protein CheY [Flagella (VF0430) - Motility (VFC0204)] [Bacillus subtilis (VF0430)]

VFG038365(gb|WP\_011705044) (*hcp1*) HcpA-like protein [T6SS (VF0480) - Effector delivery system (VFC008)] [Yersinia enterocolitica (VF0480)]

VFG038880(gb|WP\_005314250) (*lfgK*) lateral flagellar hook-associated protein [Lateral flagella (VF0474) - Motility (VFC0204)] [Yersinia enterocolitica (VF0474)]

VFG048609(gb|WP\_004213923) (*iucD*) lysine 6-monooxygenase IucD [Aerobactin (VF0565) - Nutritional/Metabolic function (VF0565)] [Yersinia enterocolitica (VF0565)]

VFG050301(gb|NP\_218420) (*cpnT*) NAD<sup>+</sup> glycohydrolase [CpnT (VF1197) - Effector delivery system (VFC008)] [Yersinia enterocolitica (VF1197)]

VFG048518(gb|WP\_012737617) (*fepA*) outer membrane receptor FepA [Ent (VF0562) - Nutritional/Metabolic function (VF0562)] [Yersinia enterocolitica (VF0562)]

VFG050699(gb|WP\_000840548.1) (*pilR*) sigma-54 dependent transcriptional regulator [TFP (VF1334) - Adherence (VFC0001)] [Yersinia enterocolitica (VF1334)]

VFG002060(gb|NP\_248764) (*ppkA*) serine/threonine protein kinase PpkA [HSI-I (VF0334) - Effector delivery system (VFC008)] [Yersinia enterocolitica (VF0334)]

VFG048985(gb|WP\_014907219) (KP1\_RS17355) phosphatase PAP2 family protein [Capsule (VF0560) - Immune modulation (VFC025)] [Yersinia enterocolitica (VF0560)]

VFG012865 (*ipaH*) invasion plasmid antigen IpaH [TTSS secreted effectors (VF0978) - Effector delivery system (VFC008)] [Yersinia enterocolitica (VF0978)]

VFG038679(gb|WP\_016350055) (*flhB*) flagellar biosynthetic protein FlhB [Polar flagella (VF0473) - Motility (VFC0204)] [Yersinia enterocolitica (VF0473)]

VFG038603(gb|WP\_016349155) (*mshK*) MSHA (mannose-sensitive hemagglutinin) pili biogenesis protein MshK [Pili (VF0564) - Adherence (VFC0001)] [Yersinia enterocolitica (VF0564)]

VFG050400(gb|WP\_000347039.1) (*pilU*) PilT/PilU family type 4a pilus ATPase [TFP (VF1334) - Adherence (VFC0001)] [Yersinia enterocolitica (VF1334)]

VFG001228(gb|NP\_249102) (*pilJ*) twitching motility protein PilJ [Type IV pili (VF0082) - Adherence (VFC0001)] [Yersinia enterocolitica (VF0082)]

VFG002196(gb|WP\_011109578) (EF3023) polysaccharide lyase, family 8 [Hyaluronidase (VF0359) - Exoenzyme (VF0359)] [Yersinia enterocolitica (VF0359)]

VFG049149(gb|WP\_041169023) (*clbC*) colibactin polyketide synthase ClbC [Colibactin (VF0573) - Exotoxin (VFC0235)] [Yersinia enterocolitica (VF0573)]

VFG045474(gb|AAM75251) (*cylM*) CylM; cytolysin subunit modifier [Cytolysin (VF0356) - Exotoxin (VFC0235)] [Yersinia enterocolitica (VF0356)]

VFG050162(gb|WP\_001161829) (*kpsS*) Capsule polysaccharide export protein [K1 capsule (VF0239) - Invasion (VF0239)] [Yersinia enterocolitica (VF0239)]

VFG000198(gb|NP\_250394) (*pcrD*) type III secretion system protein PcrD [TTSS (VF0083) - Effector delivery system (VFC008)] [Yersinia enterocolitica (VF0083)]

VFG001447(gb|CAA50007) (*cnf1*) cytotoxic necrotizing factor 1 [CNF-1 (VF0240) - Exotoxin (VFC0235)] [Escherichia coli (VF0240)]

VFG038581(gb|WP\_043118279) (*mshB*) MSHA (mannose-sensitive hemagglutinin) pili minor prepilin protein MshB [Pili (VF0564) - Adherence (VFC0001)] [Yersinia enterocolitica (VF0564)]

VFG050263(gb|NP\_220137) (CT\_620) hypothetical protein [TTSS secreted effectors (VF0711) - Effector delivery system (VFC008)] [Yersinia enterocolitica (VF0711)]

VFG049158(gb|WP\_001297937) (*clbL*) colibactin biosynthesis amidase ClbL [Colibactin (VF0573) - Exotoxin (VFC0235)] [Yersinia enterocolitica (VF0573)]

VFG002535(gb|WP\_004198207) (*fliC*) flagellin [Flagella (VF0430) - Motility (VFC0204)] [Burkholderia pseudomallei (VF0430)]

VFG038667(gb|WP\_016350054) (*fliP*) flagellar biosynthesis protein FliP [Polar flagella (VF0473) - Motility (VFC0204)] [Yersinia enterocolitica (VF0473)]

VFG014720(gb|NP\_250152) (*motD*) flagellar motor protein [Flagella (VF0273) - Motility (VFC0204)] [Pseudomonas aeruginosa (VF0273)]

VFG037176(gb|WP\_001081735) (*plc1*) phospholipase C [Phospholipase C (VF0470) - Exotoxin (VFC0235)] [Aeromonas hydrophila (VF0470)]

VFG001224(gb|NP\_249087) (*pilU*) twitching motility protein PilU [Type IV pili (VF0082) - Adherence (VFC0001)] [Yersinia enterocolitica (VF0082)]

VFG049915(gb|WP\_001142968) (*hcp2/tssD2*) Type VI secretion system protein, Hcp family [T6SS (VF0579) - Effector delivery system (VFC008)] [Yersinia enterocolitica (VF0579)]

VFG001949(gb|YP\_002344804) (Cj1421c) sugar transferase [Capsule (VF0323) - Immune modulation (VFC025)] [Yersinia enterocolitica (VF0323)]

VFG000478(gb|NP\_459678) (*fur*) ferric iron uptake transcriptional regulator [Fur (VF0113) - Regulation (VFC000000)]

VFG002049(gb|WP\_001173470) (*gspF*) general secretion pathway protein F [T2SS (VF0333) - Effector delivery (VFC000000)]

VFG037330(gb|WP\_001177743) (*basD*) acinetobactin biosynthesis protein BasD [Acinetobactin (VF0467) - Nutrient acquisition (VFC000000)]

VFG013069(gb|WP\_005019013) (*shuU*) permease of iron compound ABC transport system [Shu (VF0256) - Nutrient acquisition (VFC000000)]

VFG000366(gb|WP\_002212761) (*ybtQ*) yersiniabactin ABC transporter ATP-binding/permease protein YbtQ [Yersiniabactin (VF0564) - Nutrient acquisition (VFC000000)]

VFG042735(gb|NP\_250513) (*fimL*) hypothetical protein [Type IV pili (VF0082) - Adherence (VFC000000)] [Pseudomonas (VF000000)]

VFG050277(gb|WP\_000562056) (*vpsE*) exopolysaccharide biosynthesis flippase VpsE [VPS (VF0615) - Biofilm formation (VFC000000)]

VFG001713(gb|WP\_001298062) (*papX*) PapX protein regulates flagellum synthesis to repress motility [P fimbriae (VF000000) - Adherence (VFC000000)]

VFG041012(gb|NP\_250202) (PA1511) hypothetical protein [HSI-2 (VF0943) - Effector delivery system (VFC000000)]

VFG000181(gb|NP\_251792) (*xcpS*) general secretion pathway protein F [Xcp secretion system (VF0084) - Effector delivery (VFC000000)]

VFG000159(gb|NP\_251076) (*pvdA*) L-ornithine N5-oxygenase PvdA [Pyoverdine (VF0094) - Nutritional/Metabolic factor (VFC000000)]

VFG016338(gb|WP\_001253006) (*inhA*) immune inhibitor A metalloprotease [InhA (VF0536) - Exoenzyme (VFC000000)]

VFG038699(gb|WP\_010634617) (*cheY*) chemotaxis protein CheY [Polar flagella (VF0473) - Motility (VFC020400)]

VFG038788(gb|WP\_011706639) (*flgG*) flagellar basal body rod protein FlgG [Polar flagella (VF0473) - Motility (VFC020400)]

VFG007586(gb|WP\_001881782) (*flhF*) flagellar biosynthesis protein [Flagella (VF0519) - Motility (VFC020400)]

VFG002493(gb|WP\_045606430) (*fliO*) flagellar protein FliO [Flagella (VF0430) - Motility (VFC020400)] [Burkholderia (VF000000)]

VFG001214(gb|NP\_253237) (*pilR*) two-component response regulator PilR [Type IV pili (VF0082) - Adherence (VFC000000)]

VFG016058(gb|NP\_251114) (*pvdL*) peptide synthase PvdL [Pyoverdine (VF0094) - Nutritional/Metabolic factor (VFC000000)]

VFG038297(gb|WP\_016349341) (*exeJ*) general secretion pathway protein J [Exe T2SS (VF0478) - Effector delivery (VFC000000)]

VFG048779(gb|WP\_004190503) (*tssG*) type VI secretion system baseplate subunit TssG [T6SS (VF0569) - Effector delivery (VFC000000)]

VFG012022(gb|YP\_002344707) (*pseI*) N-acetylneuraminic acid synthetase [Flagella (VF0114) - Motility (VFC020400)]

VFG000315(gb|WP\_000694809) (*rfbM*) mannose-6-phosphate isomerase [LPS (VF0056) - Immune modulation (VFC000000)]

VFG038882(gb|WP\_005314247) (*maf-5*) modification accessory factor [Lateral flagella (VF0474) - Motility (VFC020400)]

VFG000068(gb|NP\_463735) (*actA*) actin-assembly inducing protein precursor [ActA (VF0066) - Motility (VFC020400)]

VFG044324(gb|WP\_032447693) (*ybtX*) yersiniabactin-associated zinc MFS transporter YbtX [Ybt (VF0564) - Nutrient acquisition (VFC000000)]

VFG041020(gb|NP\_250353) (PA1662) ClpA/B-type protease [HSI-2 (VF0943) - Effector delivery system (VFC000000)]

VFG012509(gb|WP\_001111200) (*iroC*) ATP binding cassette transporter [Salmochelin siderophore (VF0230) - Nutrient acquisition (VFC000000)]

VFG001210(gb|NP\_253244) (*pilY1*) type 4 fimbrial biogenesis protein PilY1 [Type IV pili (VF0082) - Adherence (VFC000000)]

VFG001270(gb|WP\_010929997) (*cyaD*) cyclolysin secretion protein [Cya (VF0028) - Exotoxin (VFC023500)] [Bordetella (VF000000)]

VFG038836(gb|WP\_011707085) (*pomA2*) chemotaxis protein PomA [Polar flagella (VF0473) - Motility (VFC020400)]

VFG048762(gb|WP\_015874732) (*impA/tssA*) type VI secretion system protein TssA [T6SS (VF0569) - Effector delivery (VFC000000)]

VFG038590(gb|WP\_043118275) (*mshE*) ATPase protein MshE, GspE-like [MSHA type IV pili (VF0477) - Adherence (VFC000000)]

VFG002077(gb|NP\_248781) (*vgrG1a*) type VI secretion system substrate VgrG1 [HSI-I (VF0334) - Effector delivery (VFC000000)]

VFG013299(gb|WP\_010868996) (*waaQ*) heptosyltransferase-like protein [LOS (VF0044) - Immune modulation (VFC000000)]

VFG042739(gb|NP\_254019) (*crc*) catabolite repression control protein [Type IV pili (VF0082) - Adherence (VFC000000)]

VFG000928(gb|WP\_000640938) (*fepG*) iron-enterobactin ABC transporter permease [Enterobactin (VF0228) - Nutrient acquisition (VFC000000)]

VFG002063(gb|NP\_248767) (*icmF1/tssM1*) type VI secretion system protein IcmF1 [HSI-I (VF0334) - Effector delivery (VFC000000)]

VFG001953(gb|YP\_002344808) (*hddA*) D-glycero-D-manno-heptose 7-phosphate kinase [Capsule (VF0323) - Immune modulation (VFC000000)]

VFG000036(gb|WP\_010929614) (*bpIC*) lipopolysaccharide biosynthesis protein [LPS (VF0033) - Immune modulation (VFC000000)]

VFG002192(gb|WP\_002386893) (*fsrC*) histidine kinase, putative [Fsr (VF0360) - Biofilm (VFC027100)] [Enterococcus (VF000000)]

VFG000303(gb|WP\_000495985) (*virB4/cagE*) type IV secretion system protein Cag23/CagE, VirB4 homolog [Type IV secretion system (VF000000) - Effector delivery (VFC000000)]

VFG038663(gb|WP\_005298795) (*fliO*) flagellar biosynthesis protein, FliO [Polar flagella (VF0473) - Motility (VFC020400)]

VFG038587(gb|WP\_016349160) (*mshG*) MSHA (mannose-sensitive hemagglutinin) pili biogenesis protein MshG [MSHA type IV pili (VF0477) - Adherence (VFC000000)]

VFG048297(gb|WP\_014906961) (*fimG*) type 1 fimbrial minor component [Type I fimbriae (VF0566) - Adherence (VFC000000)]

VFG037720(gb|WP\_001027056) (*adeG*) cation/multidrug efflux pump [AdeFGH efflux pump (VF0504) - Biofilm formation (VFC000000)]

VFG002069(gb|NP\_248773) (*hsiB1/vipA/tssB*) type VI secretion system tubule-forming protein VipA [HSI-I (VF0334) - Effector delivery (VFC000000)]

VFG000617(gb|NP\_709456) (*iucC*) aerobactin synthesis protein IucC [Aerobactin (VF0123) - Nutritional/Metabolic factor (VFC0251)] [Enterococcus faecalis (VF000001)]

VFG051070(gb|WP\_001066523.1) (*tssC*) type VI secretion system contractile sheath large subunit [T6SS (VF1337) - Effector delivery system (VFC0086)] [Enterococcus faecalis (VF000001)]

VFG049114(gb|WP\_012737527) (*allS*) DNA-binding transcriptional activator AllS [Allantoin utilization (VF0579) - Nutritional/Metabolic factor (VFC0251)] [Enterococcus faecalis (VF000001)]

VFG002174(gb|WP\_002369251) (*gelE*) coccolysin [Gelatinase (VF0357) - Exoenzyme (VFC0251)] [Enterococcus faecalis (VF000001)]

VFG000877(gb|WP\_001244821) (*fimF*) FimF protein precursor [Type 1 fimbriae (VF0221) - Adherence (VFC0001)] [Enterococcus faecalis (VF000001)]

VFG048257(gb|WP\_004174507) (*fimI*) type 1 pilus biosynthesis fimbrial protein [Type I fimbriae (VF0566) - Adherence (VFC0001)] [Enterococcus faecalis (VF000001)]

VFG042979(gb|WP\_002379311) (*srtC*) sortase [Ebp pili (VF0538) - Adherence (VFC0001)] [Enterococcus faecalis (VF000001)]

VFG038889(gb|WP\_005314215) (*lafT*) LafT, flagella motor stator protein [Lateral flagella (VF0474) - Motility (VFC0204)] [Aeromonas hydrophila (VF000001)]

VFG001230(gb|NP\_251805) (*fimV*) a polar peptidoglycan-binding protein involved in type IV pilus assembly [Type IV pili (VF0082) - Adherence (VFC0001)] [Enterococcus faecalis (VF000001)]

VFG001299(gb|WP\_000565297) (*cap8C*) type 8 capsular polysaccharide synthesis protein Cap8C [Capsule (VF0560) - Adherence (VFC0001)] [Enterococcus faecalis (VF000001)]

VFG013658(gb|WP\_011988414) (*pilN*) type IV pilus inner membrane platform protein PilN [Type IV pili (VF0082) - Adherence (VFC0001)] [Enterococcus faecalis (VF000001)]

VFG000136(gb|NP\_249456) (*mucC*) negative regulator for alginate biosynthesis MucB [Alginate (VF0091) - Biofilm formation (VFC0001)] [Enterococcus faecalis (VF000001)]

VFG001965(gb|YP\_002344820) (*Cj1437c*) aminotransferase [Capsule (VF0323) - Immune modulation (VFC0251)] [Enterococcus faecalis (VF000001)]

VFG002046(gb|WP\_000135089) (*gspC*) general secretion pathway protein C [T2SS (VF0333) - Effector delivery system (VFC0086)] [Enterococcus faecalis (VF000001)]

VFG050160(gb|WP\_000030755) (*kpsU*) 3-deoxy-manno-octulosonate cytidylyltransferase [K1 capsule (VF0239) - Adherence (VFC0001)] [Enterococcus faecalis (VF000001)]

VFG043209(gb|WP\_005168769) (*cheD*) methyl-accepting chemotaxis protein CheD [Flagella (VF0394) - Motility (VFC0204)] [Aeromonas hydrophila (VF000001)]

VFG048830(gb|WP\_014907233) (*gndA*) NADP-dependent phosphogluconate dehydrogenase [Capsule (VF0560) - Adherence (VFC0001)] [Enterococcus faecalis (VF000001)]

VFG048267(gb|WP\_015875145) (*fimC*) periplasmic chaperone [Type I fimbriae (VF0566) - Adherence (VFC0001)] [Enterococcus faecalis (VF000001)]

VFG045584(gb|WP\_010948248) (*LPG\_RS12855*) Dot/Icm type IV secretion system effector [Dot/Icm T4SS secretion system (VF000001)] [Coxiella burnetii (VF000001)]

VFG000924(gb|WP\_001234311) (*fepB*) ferrienterobactin ABC transporter periplasmic binding protein [Enterobacteriaceae (VF000001)] [Enterobacteriaceae (VF000001)]

VFG000185(gb|NP\_250381) (*pscU*) type III secretion system protein PscU [TTSS (VF0083) - Effector delivery system (VFC0086)] [Yersinia enterocolitica (VF000001)]

VFG005361(gb|WP\_002352221) (*spaP/pac*) cell surface antigen SpaP [SpaP (VF0526) - Adherence (VFC0001)] [Yersinia enterocolitica (VF000001)]

VFG039311(gb|NP\_819427) (*cetCb2*) Coxiella Dot/Icm type IVB secretion system translocated effector [T4SS secretion system (VF000001)] [Coxiella burnetii (VF000001)]

VFG000361(gb|WP\_000982866) (*ybtU*) yersiniabactin biosynthetic protein YbtU [Yersiniabactin (VF0136) - Nutritional/Metabolic factor (VFC0251)] [Yersinia enterocolitica (VF000001)]

VFG001302(gb|WP\_001028293) (*cap8F*) type 8 capsular polysaccharide synthesis protein Cap8F [Capsule (VF0560) - Adherence (VFC0001)] [Enterococcus faecalis (VF000001)]

VFG041031(gb|NP\_251049) (*PA2359*) transcriptional regulator [HSI-3 (VF0944) - Effector delivery system (VFC0086)] [Yersinia enterocolitica (VF000001)]

VFG002274(gb|WP\_011009584) (*plc*) phospholipase C [Alpha-toxin (CpPLC) (VF0378) - Exotoxin (VFC0235)] [Yersinia enterocolitica (VF000001)]

VFG038816(gb|WP\_011706646) (*cheV*) CheV [Polar flagella (VF0473) - Motility (VFC0204)] [Aeromonas hydrophila (VF000001)]

VFG042978(gb|WP\_011109477) (*ebpC*) endocarditis and biofilm-associated pilus major subunit EbpC [Ebp pili (VF0538) - Adherence (VFC0001)] [Enterococcus faecalis (VF000001)]

VFG049051(gb|WP\_014907239) (*KP1\_RS17230*) glycosyltransferase [LPS (VF0561) - Immune modulation (VFC0251)] [Coxiella burnetii (VF000001)]

VFG045337(gb|AHK25022) (*llsD*) streptolysin-associated protein LlsD [LLS (VF0410) - Exotoxin (VFC0235)] [Streptococcus pyogenes (VF000001)]

VFG000862(gb|WP\_014639426) (*pet*) Pet serine protease precursor, autotransporter [Pet (VF0217) - Effector delivery system (VFC0086)] [Yersinia enterocolitica (VF000001)]

VFG045626(gb|WP\_014748741) (*scm*) collagen adhesin protein Scm [Scm (VF0418) - Adherence (VFC0001)] [Yersinia enterocolitica (VF000001)]

VFG000365(gb|WP\_002214412) (*ybtP*) yersiniabactin ABC transporter ATP-binding/permease protein YbtP [Yersiniabactin (VF0136) - Nutritional/Metabolic factor (VFC0251)] [Yersinia enterocolitica (VF000001)]

VFG002171(gb|WP\_011109430) (*EF0149*) aggregation substance [AS (VF0352) - Adherence (VFC0001)] [Enterococcus faecalis (VF000001)]

VFG001225(gb|NP\_249099) (*pilG*) twitching motility protein PilG [Type IV pili (VF0082) - Adherence (VFC0001)] [Enterococcus faecalis (VF000001)]

VFG002187(gb|WP\_002370472) (*cpsD*) glycosyl transferase, group 2 family protein [Capsule (VF0361) - Immune modulation (VFC0251)] [Enterococcus faecalis (VF000001)]

VFG050959(gb|WP\_000556915.1) (*tssM*) type VI secretion system membrane subunit TssM [T6SS (VF1337) - Effector delivery system (VFC0086)] [Enterococcus faecalis (VF000001)]

VFG034895(gb|WP\_001304001) (*espY1*) Type III secretion system effector EspY1 [TTSS secreted effectors (VF000001)] [Yersinia enterocolitica (VF000001)]

VFG034636(gb|WP\_000358674) (*cfaC*) colonisation factor antigen c, usher [Adhesive fimbriae (VF0213) - Adherence (VFC0001)] [Yersinia enterocolitica (VF000001)]

VFG044085(gb|NP\_251074) (*PA2384*) hypothetical protein [Pyoverdine (VF0094) - Nutritional/Metabolic factor (VFC0251)] [Corynebacterium jeikeium (VF000001)]

VFG007849(gb|NP\_217449) (*ppsC*) phthiocerol synthesis polyketide synthase type I PpsC [PDIM (VF0309) - Immune modulation (VFC0251)] [Mycobacterium tuberculosis (VF000001)]

VFG049911(gb|WP\_000393837) (*tssF*) Type VI secretion system protein TssF [T6SS (VF0579) - Effector delivery system (VFC0086)] [Enterococcus faecalis (VF000001)]

VFG038407(gb|WP\_011705728) (*vgrG3*) VgrG protein [T6SS (VF0480) - Effector delivery system (VFC0086)] [Enterococcus faecalis (VF000001)]

VFG001223(gb|NP\_249086) (*pilT*) twitching motility protein PilT [Type IV pili (VF0082) - Adherence (VFC0001)] [Enterococcus faecalis (VF000001)]

VFG039316(gb|NP\_819448) (*coxCC3*) Coxiella Dot/Icm type IVB secretion system translocated effector [T4SS secretion system (VF000001)] [Coxiella burnetii (VF000001)]

VFG038593(gb|WP\_016349158) (mshN) Tetratricopeptide repeat protein, PilF-like [MSHA type IV pili (VF0477) - Adherence (VFC0001)] [Aeromonas hydrophila (VF0477) - Motility (VFC0204)] [Aeromonas hydrophila (VF0477) - Motility (VFC0204)]

VFG044329(gb|WP\_015874964) (irp1) yersiniabactin polyketide synthase HMWP1 [Ybt (VF0564) - Nutritional/Metabolic factor (VFC027) - Nutritional/Metabolic factor (VFC027)] [Yersinia enterocolitica (VF0564) - Nutritional/Metabolic factor (VFC027) - Nutritional/Metabolic factor (VFC027)]

VFG038865(gb|WP\_005314289) (fliG) flagellar motor switch protein G [Lateral flagella (VF0474) - Motility (VFC0204)] [Aeromonas hydrophila (VF0474) - Motility (VFC0204)]

VFG038488(gb|WP\_016349432) (tapY1) type IV pilus biogenesis protein [Tap type IV pili (VF0475) - Adherence (VFC0001)] [Aeromonas hydrophila (VF0475) - Adherence (VFC0001)]

VFG050372(gb|WP\_001017033.1) (pilQ) type IV pilus secretin PilQ [TFP (VF1334) - Adherence (VFC0001)] [Aeromonas hydrophila (VF1334) - Adherence (VFC0001)]

VFG042382(gb|WP\_000260524) (etpB) two-partner secretion transporter EtpB [EtpA (VF0437) - Adherence (VFC0001)] [Aeromonas hydrophila (VF0437) - Adherence (VFC0001)]

VFG001271(gb|WP\_010929998) (cyaE) cyclolysin secretion protein [Cya (VF0028) - Exotoxin (VFC0235)] [Bordetella pertussis (VF0028) - Exotoxin (VFC0235)]

VFG000161(gb|NP\_251089) (pvdD) pyoverdine synthetase D [Pyoverdine (VF0094) - Nutritional/Metabolic factor (VFC027) - Nutritional/Metabolic factor (VFC027)] [Pseudomonas aeruginosa (VF0094) - Nutritional/Metabolic factor (VFC027) - Nutritional/Metabolic factor (VFC027)]

VFG038845(gb|WP\_016351249) (nueA) NeuA protein [Polar flagella (VF0473) - Motility (VFC0204)] [Aeromonas hydrophila (VF0473) - Motility (VFC0204)]

VFG050386(gb|WP\_000355489.1) (pilT) type IV pilus twitching motility protein PilT [TFP (VF1334) - Adherence (VFC0001)] [Aeromonas hydrophila (VF1334) - Adherence (VFC0001)]

VFG048478(gb|WP\_004147521) (fepG) iron-enterobactin transporter permease [Ent (VF0562) - Nutritional/Metabolic factor (VFC027) - Nutritional/Metabolic factor (VFC027)] [Enterobacteriaceae (VF0562) - Nutritional/Metabolic factor (VFC027) - Nutritional/Metabolic factor (VFC027)]

VFG038596(gb|WP\_016349157) (mshM) membrane protein with ATPase domain, GspA-like [MSHA type IV pili (VF0477) - Adherence (VFC0001)] [Aeromonas hydrophila (VF0477) - Adherence (VFC0001)]

VFG038800(gb|WP\_016351322) (flgD) flagellar hook capping protein [Polar flagella (VF0473) - Motility (VFC0204)] [Aeromonas hydrophila (VF0473) - Motility (VFC0204)]

VFG000932(gb|WP\_000026784) (entE) 2,3-dihydroxybenzoate-AMP ligase component of enterobactin synthase [Ent (VF0562) - Nutritional/Metabolic factor (VFC027) - Nutritional/Metabolic factor (VFC027)] [Enterobacteriaceae (VF0562) - Nutritional/Metabolic factor (VFC027) - Nutritional/Metabolic factor (VFC027)]

VFG044096(gb|NP\_252908) (PA4218) transporter [Pyochelin (VF0095) - Nutritional/Metabolic factor (VFC027) - Nutritional/Metabolic factor (VFC027)] [Pseudomonas aeruginosa (VF0095) - Nutritional/Metabolic factor (VFC027) - Nutritional/Metabolic factor (VFC027)]

VFG002067(gb|NP\_248771) (fha1) type VI secretion system forkhead-associated protein Fha1 [HSI-I (VF0334) - Effector delivery system (VFC008) - Effector delivery system (VFC008)] [Pseudomonas aeruginosa (VF0334) - Effector delivery system (VFC008) - Effector delivery system (VFC008)]

VFG034721(gb|WP\_000556298) (ibeC) phosphoethanolamine transferase CptA [Ibes (VF0237) - Invasion (VFC0204)] [Aeromonas hydrophila (VF0237) - Invasion (VFC0204)]

VFG038432(gb|WP\_016352168) (tapB) type IV pilus assembly ATPase, PilB-like [Tap type IV pili (VF0475) - Adherence (VFC0001)] [Aeromonas hydrophila (VF0475) - Adherence (VFC0001)]

VFG041120(gb|WP\_011205628) (BPS\_RS26880) sensor histidine kinase VirA [T6SS-1 (VF0429) - Effector delivery system (VFC008) - Effector delivery system (VFC008)] [Burkholderia pseudomallei (VF0429) - Effector delivery system (VFC008) - Effector delivery system (VFC008)]

VFG002489(gb|WP\_181937968) (tssM-5) Type VI secretion system protein TssM [T6SS-1 (VF0429) - Effector delivery system (VFC008) - Effector delivery system (VFC008)] [Burkholderia pseudomallei (VF0429) - Effector delivery system (VFC008) - Effector delivery system (VFC008)]

VFG001248(gb|NP\_249788) (fleQ) transcriptional regulator FleQ [Flagella (VF0273) - Motility (VFC0204)] [Pseudomonas aeruginosa (VF0273) - Motility (VFC0204)]

VFG038695(gb|WP\_017409955) (fliA) flagellar biosynthesis sigma factor [Polar flagella (VF0473) - Motility (VFC0204)] [Aeromonas hydrophila (VF0473) - Motility (VFC0204)]

VFG001304(gb|WP\_001216935) (cap8H) type 8 capsular polysaccharide synthesis protein Cap8H [Capsule (VF0361) - Immune modulation (VFC0204)] [Aeromonas hydrophila (VF0361) - Immune modulation (VFC0204)]

VFG014117(gb|NP\_251831) (wbpM) nucleotide sugar epimerase/dehydratase WbpM [LPS (VF0085) - Immune modulation (VFC0204)] [Aeromonas hydrophila (VF0085) - Immune modulation (VFC0204)]

VFG002491(gb|WP\_004524547) (fliM) flagellar motor switch protein FliM [Flagella (VF0430) - Motility (VFC0204)] [Aeromonas hydrophila (VF0430) - Motility (VFC0204)]

VFG038832(gb|WP\_016351724) (pomB2) flagellar motor protein MotB [Polar flagella (VF0473) - Motility (VFC0204)] [Aeromonas hydrophila (VF0473) - Motility (VFC0204)]

VFG002184(gb|WP\_002359685) (cpsG) MurB family protein [Capsule (VF0361) - Immune modulation (VFC0204)] [Aeromonas hydrophila (VF0361) - Immune modulation (VFC0204)]

VFG031840(gb|NP\_218383) (espG1) ESX-1 secretion-associated protein EspG1 [ESX-1 (VF0315) - Effector delivery system (VFC008) - Effector delivery system (VFC008)] [Mycobacterium tuberculosis (VF0315) - Effector delivery system (VFC008) - Effector delivery system (VFC008)]

VFG041013(gb|NP\_250203) (hcpA) secreted protein Hcp [HSI-2 (VF0943) - Effector delivery system (VFC008) - Effector delivery system (VFC008)] [Pseudomonas aeruginosa (VF0943) - Effector delivery system (VFC008) - Effector delivery system (VFC008)]

VFG002277(gb|WP\_011009663) (nagH) hyaluronidase [Mu-toxin (VF0389) - Exoenzyme (VFC0251)] [Clostridium perfringens (VF0389) - Exoenzyme (VFC0251)]

VFG000446(gb|NP\_459541) (fimD) usher protein FimD [Type 1 fimbriae (VF0102) - Adherence (VFC0001)] [Salmonella enteritidis (VF0102) - Adherence (VFC0001)]

VFG001240(gb|NP\_249773) (flgG) flagellar basal-body rod protein FlgG [Flagella (VF0273) - Motility (VFC0204)] [Pseudomonas aeruginosa (VF0273) - Motility (VFC0204)]

VFG038796(gb|WP\_016351321) (flgE) flagellar hook protein FlgE [Polar flagella (VF0473) - Motility (VFC0204)] [Aeromonas hydrophila (VF0473) - Motility (VFC0204)]

VFG048338(gb|WP\_002916079) (mrkI) LuxR family regulatory protein [Type 3 fimbriae (VF0567) - Biofilm (VFC0204)] [Vibrio cholerae (VF0567) - Biofilm (VFC0204)]

VFG000153(gb|NP\_252166) (rhII) autoinducer synthesis protein RhII [Quorum sensing (VF0093) - Biofilm (VFC0204)] [Vibrio cholerae (VF0093) - Biofilm (VFC0204)]

VFG034612(gb|WP\_000225871) (cfaA) colonisation factor antigen a, chaperone [Adhesive fimbriae (VF0213) - Adherence (VFC0001)] [Escherichia coli (VF0213) - Adherence (VFC0001)]

VFG038764(gb|WP\_017409846) (flrA) FleQ protein [Polar flagella (VF0473) - Motility (VFC0204)] [Aeromonas hydrophila (VF0473) - Motility (VFC0204)]

VFG049144(gb|WP\_002892069) (acrB) acriflavine resistance protein B [AcrAB (VF0568) - Antimicrobial activity (VFC0204)] [Aeromonas hydrophila (VF0568) - Antimicrobial activity (VFC0204)]

VFG048237(gb|WP\_002916189) (fimE) tyrosine recombinase [Type I fimbriae (VF0566) - Adherence (VFC0001)] [Salmonella enteritidis (VF0566) - Adherence (VFC0001)]

VFG041015(gb|NP\_250348) (PA1657) hypothetical protein [HSI-2 (VF0943) - Effector delivery system (VFC008) - Effector delivery system (VFC008)] [Pseudomonas aeruginosa (VF0943) - Effector delivery system (VFC008) - Effector delivery system (VFC008)]

VFG034817(gb|WP\_000671691) (espR1) Type III secretion system effector espR1 [TTSS secreted effectors (VF0479) - Effector delivery system (VFC008) - Effector delivery system (VFC008)] [Yersinia enterocolitica (VF0479) - Effector delivery system (VFC008) - Effector delivery system (VFC008)]

VFG038320(gb|WP\_005320812) (ascL) Type III secretion system C ring protein AscL [T3SS (VF0479) - Effector delivery system (VFC008) - Effector delivery system (VFC008)] [Yersinia enterocolitica (VF0479) - Effector delivery system (VFC008) - Effector delivery system (VFC008)]

VFG015045(gb|NP\_249821) (rhIC) rhamnosyltransferase 2 [Rhamnolipid (VF0089) - Immune modulation (VFC0204)] [Pseudomonas aeruginosa (VF0089) - Immune modulation (VFC0204)]

VFG038277(gb|WP\_016349336) (exeE) general secretory pathway protein E [Exe T2SS (VF0478) - Effector delivery system (VFC008) - Effector delivery system (VFC008)] [Pseudomonas aeruginosa (VF0478) - Effector delivery system (VFC008) - Effector delivery system (VFC008)]

VFG037987(gb|WP\_000037963) (pseI) pseudaminic acid synthase [Capsule (VF0465) - Immune modulation (VFC0204)] [Aeromonas hydrophila (VF0465) - Immune modulation (VFC0204)]

VFG000678(gb|AAD32426) (cya) calmodulin sensitive adenylate cyclase, edema factor [Anthrax toxin (VF0142) - Exotoxin (VFC0235)] [Bacillus anthracis (VF0142) - Exotoxin (VFC0235)]



VFG048676(gb|WP\_014907726) (ompA) OmpA family protein [T6SS (VF0569) - Effector delivery system (VFC000001)] [Motility (VFC0204)]

VFG001256(gb|NP\_250134) (fliM) flagellar motor switch protein FliM [Flagella (VF0273) - Motility (VFC0204)]

VFG000119(gb|NP\_253948) (algR) alginate biosynthesis regulatory protein AlgR [Alginate (VF0091) - Biofilm formation (VFC000001)]

VFG041035(gb|NP\_251053) (PA2363) hypothetical protein [HSI-3 (VF0944) - Effector delivery system (VFC000001)]

VFG000930(gb|WP\_000077767) (entF) enterobactin synthase multienzyme complex component, ATP-dependent [Ent (VF0562) - Nutritional/Metabolic factor (VFC000001)]

VFG038367(gb|WP\_011705045) (vgrG1) Type VI secretion system effector VgrG1, ADP-ribosyltransferase [T6SS (VF0480) - Effector delivery system (VFC000001)]

VFG024730(gb|NP\_217462) (pks1) polyketide synthase [PDIM (VF0309) - Immune modulation (VFC0258)] [Immune modulation (VFC0258)]

VFG002198(gb|WP\_003850266) (tox) Diphtheria toxin precursor [DT (VF0363) - Exotoxin (VFC0235)] [Corynebacterium diphtheriae (VF0363)]

VFG002219(gb|WP\_011005413) (cgs) cyclic beta 1-2 glucan synthetase [CG (VF0366) - Immune modulation (VFC0258)]

VFG045464(gb|WP\_000562556) (tcpC) Tir domain containing protein TcpC [TcpC (VF0413) - Immune modulation (VFC0258)]

VFG043623(gb|WP\_002916122) (mrkF) type 3 fimbrial minor pilin subunit MrkF [Type 3 fimbriae (VF0567) - Adherence (VFC000001)]

VFG000878(gb|WP\_000872015) (fimG) FimG protein precursor [Type 1 fimbriae (VF0221) - Adherence (VFC000001)]

VFG038269(gb|WP\_075384415) (exeC) general secretion pathway protein C [Exe T2SS (VF0478) - Effector delivery system (VFC000001)]

VFG001254(gb|NP\_249795) (fliI) flagellum-specific ATP synthase FliI [Flagella (VF0273) - Motility (VFC0204)]

VFG041257(gb|WP\_010946432) (ankN/ankX/legA8) Dot/Icm Type IV secretion system effector AnkX ankyrin repeat domain [Dot/Icm T4SS (VF0479) - Effector delivery system (VFC000001)]

VFG034922(gb|WP\_001303732) (espY5) hypothetical protein [TTSS secreted effectors (VF1110) - Effector delivery system (VFC000001)]

VFG034901(gb|WP\_000868321) (espY2) Type III secretion system effector EspY2 [TTSS secreted effectors (VF0479) - Effector delivery system (VFC000001)]

VFG038561(gb|WP\_016349168) (mshQ) MSHA (mannose-sensitive hemagglutinin) pili biogenesis protein MshQ [Pili (VF0475) - Adherence (VFC000001)]

VFG000145(gb|NP\_250562) (lasA) LasA protease precursor [LasA (VF0088) - Effector delivery system (VFC000001)]

VFG037678(gb|WP\_000866237) (pgaC) poly-beta-1,6 N-acetyl-D-glucosamine synthase [PNAG (VF0472) - Biofilm formation (VFC000001)]

VFG001814(gb|NP\_215678) (narH) nitrate reductase subunit beta [Nitrate reductase (VF0302) - Nutritional/Metabolic factor (VFC000001)]

VFG000091(gb|WP\_001176374) (tcpA) toxin-coregulated pilus (TCP) major pilin TcpA [TCP (VF0126) - Adherence (VFC000001)]

VFG002190(gb|WP\_002362225) (cpsA/uppS) undecaprenyl diphosphate synthase [Capsule (VF0361) - Immune modulation (VFC0258)]

VFG038812(gb|WP\_011706645) (cheR-3) chemotaxis protein CheR [Polar flagella (VF0473) - Motility (VFC0204)]

VFG038374(gb|WP\_011705709) (atsB) Type VI secretion system protein [T6SS (VF0480) - Effector delivery system (VFC000001)]

VFG000922(gb|WP\_000910402) (chuU) heme permease protein ChuU [Chu (VF0227) - Nutritional/Metabolic factor (VFC000001)]

VFG001266(gb|NP\_252912) (pchI) ABC transporter ATP-binding protein [Pyochelin (VF0095) - Nutritional/Metabolic factor (VFC000001)]

VFG034772(gb|WP\_000627910) (espL4) Type III secretion system effector EspL4 [TTSS secreted effectors (VF0479) - Effector delivery system (VFC000001)]

VFG045545(gb|WP\_010947529) (LPG\_RS09040) Dot/Icm type IV secretion system effector [Dot/Icm T4SS secreted effectors (VF0479) - Effector delivery system (VFC000001)]

VFG038373(gb|WP\_011705708) (atsA) Type VI secretion system protein [T6SS (VF0480) - Effector delivery system (VFC000001)]

VFG016038(gb|NP\_251090) (pvdJ) pyoverdine biosynthesis protein PvdJ [Pyoverdine (VF0094) - Nutritional/Metabolic factor (VFC000001)]

VFG000902(gb|WP\_001034089) (sat) Acreted auto transpoter toxin [Sat (VF0231) - Effector delivery system (VFC000001)]

VFG048468(gb|WP\_004176917) (fepD) iron-enterobactin transporter membrane protein [Ent (VF0562) - Nutritional/Metabolic factor (VFC000001)]

VFG000894(gb|WP\_001239363) (papH) P pilus termination subunit PapH [P fimbriae (VF0220) - Adherence (VFC000001)]

VFG047137(gb|WP\_003022294) (wzy) membrane protein [LPS (VF0542) - Immune modulation (VFC0258)] [Flagella (VF0273)]

VFG038501(gb|WP\_043119142) (tapV) type IV pilus assembly protein TapV [Tap type IV pili (VF0475) - Adherence (VFC000001)]

VFG048632(gb|WP\_004176434) (vipA/tssB) type VI secretion system contractile sheath small subunit VipA [T6SS (VF0480) - Effector delivery system (VFC000001)]

VFG042390(gb|WP\_011478152) (sfaX) regulatory protein SfaX [S fimbriae (VF0222) - Adherence (VFC000001)]

VFG048439(gb|WP\_014907941) (entC) isochorismate synthase [Ent (VF0562) - Nutritional/Metabolic factor (VFC000001)]

VFG038647(gb|WP\_016350053) (fliK) flagellar hook-length control protein FliK [Polar flagella (VF0473) - Motility (VFC0204)]

VFG002182(gb|WP\_002376666) (cpsI) UDP-galactopyranose mutase [Capsule (VF0361) - Immune modulation (VFC0258)]

VFG002458(gb|WP\_004525314) (bsaT) Type III secretion system protein BsaT [Bsa T3SS (VF0428) - Effector delivery system (VFC000001)]

VFG048317(gb|WP\_014906959) (fimK) transcriptional regulator [Type I fimbriae (VF0566) - Adherence (VFC000001)]

VFG002548(gb|WP\_004550042) (wcbR) capsular polysaccharide biosynthesis fatty acid synthase [Capsule I (VF0361) - Immune modulation (VFC0258)]

VFG041429(gb|WP\_005771199) (CBUK\_RS06760) ankyrin repeat domain-containing protein [T4SS secreted effectors (VF0479) - Effector delivery system (VFC000001)]

VFG038375(gb|WP\_011705710) (atsC) Type VI secretion system protein [T6SS (VF0480) - Effector delivery system (VFC000001)]

VFG035909(gb|WP\_001216023) (aatA) outer membrane protein AatA [Dispersin (VF0215) - Others (VFC0346)]

VFG038376(gb|WP\_164927604) (atsD) Type VI secretion system protein [T6SS (VF0480) - Effector delivery system (VFC0258)]

VFG049909(gb|WP\_001113715) (fha) Type VI secretion system protein Fha [T6SS (VF0579) - Effector delivery system (VFC0258)]

VFG000144(gb|NP\_249940) (aprA) alkaline metalloproteinase precursor [Alkaline protease (VF0090) - Exoenzyme (VFC0258)]

VFG001296(gb|WP\_000676533) (sspA) serine protease; V8 protease; glutamyl endopeptidase [V8 protease (VF0090) - Exoenzyme (VFC0258)]

VFG037897(gb|WP\_001165095) (tviB) Vi polysaccharide biosynthesis UDP-N-acetylglucosamine C-6 dehydrogenase [Vi polysaccharide biosynthesis (VF0274) - Immune modulation (VFC0258)]

VFG048687(gb|WP\_002902160) (hcp/tssD) type VI secretion system protein, Hcp family [T6SS (VF0569) - Effector delivery system (VFC0258)]

VFG050158(gb|WP\_000905916) (kpsE) Capsule polysaccharide export inner-membrane protein [K1 capsule (VF0274) - Immune modulation (VFC0258)]

VFG000873(gb|WP\_000695571) (fimA) Type-1 fimbrial protein, A chain precursor [Type 1 fimbriae (VF0221) - Adherence (VFC0258)]

VFG005930(gb|WP\_000591736) (GBS\_RS06565) glycosyltransferase [Capsule (VF0274) - Immune modulation (VFC0258)]

VFG007157(gb|WP\_005464652) (vopN) type III secretion system protein VopN [T3SS1 (VF0408) - Effector delivery system (VFC0258)]

VFG001443(gb|AAF37887) (ompA) outer membrane protein A [OmpA (VF0236) - Invasion (VFC0083)] [Escherichia coli (VFC0083)]

VFG001295(gb|WP\_001089097) (sspB) staphopain cysteine proteinase SspB [Staphopain (VF0006) - Exoenzyme (VFC0258)]

VFG047529(gb|WP\_003029409) (bioA) adenosylmethionine-8-amino-7-oxononanoate aminotransferase [Biotin synthetase (VF0006) - Exoenzyme (VFC0258)]

VFG034815(gb|WP\_000671689) (espR1) Type III secretion system effector espR1 [TTSS secreted effectors (VF0006) - Exoenzyme (VFC0258)]

VFG043774(gb|AAB24244) (bont) botulinum neurotoxin, BoNT [BoNT (VF0375) - Exotoxin (VFC0235)] [Clostridium botulinum (VFC0235)]

VFG048498(gb|WP\_012737619) (entF) enterobactin synthase subunit F [Ent (VF0562) - Nutritional/Metabolic factor (VFC0258)]

VFG044331(gb|WP\_015874966) (ybtT) type II thioesterase YbtT [Ybt (VF0564) - Nutritional/Metabolic factor (VFC0258)]

VFG000208(gb|NP\_250404) (exsA) type III secretion system regulatory protein ExsA [TTSS (VF0083) - Effector delivery system (VFC0258)]

VFG038399(gb|WP\_011705723) (atsP) Type VI secretion system protein [T6SS (VF0480) - Effector delivery system (VFC0258)]

VFG016472(gb|WP\_011206327) (p216) protein P216, cilium adhesin p97 paralog [P97/P102 paralog family (VF0006) - Exoenzyme (VFC0258)]

VFG024724(gb|NP\_217463) (pks15) polyketide synthase [PDIM (VF0309) - Immune modulation (VFC0258)] [Mycobacterium tuberculosis (VFC0258)]

VFG001375(gb|WP\_000594468) (cps4K) capsular polysaccharide biosynthesis protein Cps4K [Capsule (VF0144) - Immune modulation (VFC0258)]

VFG001281(gb|WP\_000610231) (sdrE) Ser-Asp rich fibrinogen-binding bone sialoprotein-binding protein [SDr (VF0006) - Exoenzyme (VFC0258)]

VFG048528(gb|WP\_004183335) (entD) enterochelin synthetase component D [Ent (VF0562) - Nutritional/Metabolic factor (VFC0258)]

VFG051244(gb|WP\_004683766.1) (BPE043) type IV secretion system effector [T4SS secreted effectors (VF069) - Effector delivery system (VFC0258)]

VFG002531(gb|WP\_011205291) (cheA) chemotaxis two-component sensor kinase CheA [Flagella (VF0430) - Motility (VFC0204)]

VFG049150(gb|WP\_000982270) (clbD) colibactin biosynthesis dehydrogenase ClbD [Colibactin (VF0573) - Exoenzyme (VFC0258)]

VFG000871(gb|WP\_000790574) (fimB) Type 1 fimbriae Regulatory protein fimB [Type 1 fimbriae (VF0221) - Adherence (VFC0258)]

VFG002288(gb|WP\_009902069) (toxB) toxin B [TcdB (VF0377) - Exotoxin (VFC0235)] [Clostridium difficile (VFC0235)]

VFG001280(gb|WP\_000934435) (sdrD) Ser-Asp rich fibrinogen-binding bone sialoprotein-binding protein [SDr (VF0006) - Exoenzyme (VFC0258)]

VFG002526(gb|WP\_004198645) (cheB) chemotaxis-specific methyl-ersterase [Flagella (VF0430) - Motility (VFC0204)]

VFG043625(gb|WP\_000813718) (mrkC) fimbrial biogenesis outer membrane usher protein mrkC precursor [Type 1 fimbriae (VF0221) - Adherence (VFC0258)]

VFG041099(gb|NP\_459273) (STM0275) putative cytoplasmic protein [SCI (Salmonella centrisome island) (VF0006) - Exoenzyme (VFC0258)]

VFG000939(gb|WP\_001287497) (iucB) aerobactin siderophore biosynthesis protein IucB [Aerobactin (VF0229) - Nutritional/Metabolic factor (VFC0258)]

VFG039131(gb|NP\_820609) (icmE/dotG) Type IVB secretion system protein IcmE/DotG, inner membrane protein [Type IVB secretion system (VF0229) - Nutritional/Metabolic factor (VFC0258)]

VFG001857(gb|WP\_010946483) (iraB) Di/tripeptide permease [IraAB (VF0293) - Nutritional/Metabolic factor (VFC0258)]

VFG050567(gb|WP\_000768964.1) (pilY1) VWA domain-containing protein [TFP (VF1334) - Adherence (VFC0258)]

VFG045794(gb|WP\_000992818) (csgC) curli assembly protein CsgC [Curli fibers (VF1138) - Adherence (VFC0258)]

VFG000917(gb|WP\_000089583) (chuA) Outer membrane heme/hemoglobin receptor ChuA [Chu (VF0227) - Nutritional/Metabolic factor (VFC0258)]

VFG038756(gb|WP\_011706626) (flrC) transcriptional activator [Polar flagella (VF0473) - Motility (VFC0204)]

VFG002179(gb|AAD09858) (esp) Enterococcal surface protein; Esp [Esp (VF0353) - Adherence (VFC0001)] [Enterococcus faecalis (VFC0001)]

VFG049073(gb|WP\_015875021) (KP1\_RS17240) DUF4422 domain-containing protein [LPS (VF0561) - Immune modulation (VFC0258)]

VFG009561(gb|YP\_177877) (mbtI) Isochorismate synthase MbtI [Mycobactin (VF0299) - Nutritional/Metabolic factor (VFC0258)]

VFG002164(gb|WP\_002395058) (prgB/asc10) aggregation substance PrgB/Asc10 [AS (VF0352) - Adherence (VFC0258)]

VFG001263(gb|NP\_250143) (flhA) flagellar biosynthesis protein FlhA [Flagella (VF0273) - Motility (VFC0204)]

VFG002166(gb|WP\_010714416) (ace) collagen adhesin protein [Ace (VF0355) - Adherence (VFC0001)] [Enterococcus faecalis]

VFG001237(gb|NP\_249770) (flgD) flagellar basal-body rod modification protein FlgD [Flagella (VF0273) - Motility (VFC0001)] [Vibrio cholerae]

VFG000002(gb|WP\_010930159) (prn) pertactin precursor [Pertactin (VF0027) - Adherence (VFC0001)] [Bordetella pertussis]

VFG038753(gb|WP\_024944879) (motY) sodium-type flagellar protein MotY [Polar flagella (VF0473) - Motility (VFC0001)] [Vibrio cholerae]

VFG000983(gb|WP\_000517827) (rtxA) RTX toxin RtxA [MARTX (VF0265) - Exotoxin (VFC0235)] [Vibrio cholerae]

VFG048620(gb|WP\_014907843) (iutA) ferric aerobactin receptor IutA [Aerobactin (VF0565) - Nutritional/Metabolic factor (VFC0001)] [Escherichia coli]

VFG002279(gb|WP\_003467250) (nagJ) hyaluronidase [Mu-toxin (VF0389) - Exoenzyme (VFC0251)] [Clostridium perfringens]

VFG050161(gb|WP\_000579525) (kpsC) Capsule polysaccharide export protein [K1 capsule (VF0239) - Invasion (VFC0001)] [Klebsiella pneumoniae]

VFG000907(gb|WP\_000376545) (hlyB) Hemolysin B [-Hemolysin (VF0225) - Exotoxin (VFC0235)] [Escherichia coli]

VFG011757(gb|WP\_011117594) (virB4) Type IV secretion system protein VirB4 [Type IV secretion system (VF0001) - Adherence (VFC0001)] [Yersinia enterocolitica]

VFG001926(gb|YP\_002344844) (flgI) flagellar P-ring protein precursor FlgI [Flagella (VF0114) - Motility (VFC0001)] [Vibrio cholerae]

VFG049906 (tssK) Type VI secretion system protein TssK [T6SS (VF0579) - Effector delivery system (VFC0081)] [Pseudomonas aeruginosa]

VFG013647(gb|WP\_041175806) (invC/ilp) intimin-like invasin C protein [Invasin C/Ilp (VF0575) - Invasion (VFC0001)] [Yersinia enterocolitica]

VFG045349(gb|WP\_000092542) (fdeC) adhesin FdeC [FdeC (VF0506) - Adherence (VFC0001)] [Escherichia coli]

VFG002276(gb|WP\_011009653) (colA) collagenase [Kappa-toxin (VF0388) - Exoenzyme (VFC0251)] [Clostridium perfringens]

VFG002360(gb|WP\_042661486) (YE\_RS15405) O-antigen chain length determinant [O-antigen (VF0392) - Immunity (VFC0001)] [Yersinia enterocolitica]

VFG038683(gb|WP\_016350056) (flhA) flagellar biosynthesis protein FlhA [Polar flagella (VF0473) - Motility (VFC0001)] [Vibrio cholerae]

VFG001243(gb|NP\_249776) (flgJ) flagellar rod assembly protein/muramidase FlgJ [Flagella (VF0273) - Motility (VFC0001)] [Vibrio cholerae]

VFG001269(gb|WP\_010929996) (cyaB) cyclolysin secretion ATP-binding protein [Cya (VF0028) - Exotoxin (VFC0001)] [Yersinia enterocolitica]

VFG045791(gb|WP\_000481500) (cgsD) transcriptional regulator CsgD [Curli fibers (VF1138) - Adherence (VFC0001)] [Escherichia coli]

VFG012505(gb|WP\_000933673) (iroD) esterase [Salmochelinsiderophore (VF0230) - Nutritional/Metabolic factor (VFC0001)] [Yersinia enterocolitica]

VFG002515(gb|WP\_004550967) (flgI) flagellar P-ring protein precursor FlgI [Flagella (VF0430) - Motility (VFC0001)] [Vibrio cholerae]

VFG044079(gb|NP\_250944) (pvcA) paerucumarin biosynthesis protein PvcA [Pyoverdine (VF0094) - Nutritional/Metabolic factor (VFC0001)] [Pseudomonas aeruginosa]

VFG049095(gb|WP\_002912373) (rfbA) O-antigen export ABC transporter permease RfbA [LPS (VF0561) - Immunity (VFC0001)] [Escherichia coli]

VFG002412(gb|WP\_000716386) (yagY/ecpB) E. coli common pilus chaperone EcpB [ECP (VF0404) - Adherence (VFC0001)] [Escherichia coli]

VFG000368(gb|WP\_000703040) (ybtS) salicylate synthase Irp9 [Yersiniabactin (VF0136) - Nutritional/Metabolic factor (VFC0001)] [Yersinia enterocolitica]

VFG001213(gb|NP\_253236) (pilS) two-component sensor PilS [Type IV pili (VF0082) - Adherence (VFC0001)] [Yersinia enterocolitica]

VFG000903(gb|WP\_001045652) (pic) Pic serine protease precursor, autotransporter [Pic (VF0232) - Effector delivery system (VFC0001)] [Yersinia enterocolitica]

VFG002194(gb|WP\_011109506) (fsrA) response regulator [Fsr (VF0360) - Biofilm (VFC0271)] [Enterococcus faecalis]

VFG038391(gb|WP\_011705719) (atsL) Type VI secretion system protein [T6SS (VF0480) - Effector delivery system (VFC0001)] [Pseudomonas aeruginosa]

VFG000123(gb|NP\_252231) (alg8) alginate-c5-mannuronan-epimerase AlgG [Alginate (VF0091) - Biofilm (VFC0001)] [Vibrio cholerae]

VFG038675(gb|WP\_011705283) (fliR) flagellar biosynthesis protein FliR [Polar flagella (VF0473) - Motility (VFC0001)] [Vibrio cholerae]

VFG005303(gb|WP\_000836217) (rrgB) cell wall surface anchor family protein, major pilin RrgB [RlrA islet (VF0001) - Adherence (VFC0001)] [Yersinia enterocolitica]

VFG048488(gb|WP\_002893737) (fepC) iron-enterobactin transporter ATP-binding protein [Ent (VF0562) - Nutritional/Metabolic factor (VFC0001)] [Enterobacteriaceae]

VFG038436(gb|WP\_016352169) (tapC) type IV fimbrial assembly protein, PilC-like [Tap type IV pili (VF0475) - Adherence (VFC0001)] [Yersinia enterocolitica]

VFG000184(gb|NP\_251795) (xcpQ) general secretion pathway protein D [Xcp secretion system (VF0084) - Effector delivery system (VFC0001)] [Yersinia enterocolitica]

VFG000915(gb|WP\_001234179) (focH) F1C Putative fimbrial adhesin precursor [F1C fimbriae (VF0224) - Adherence (VFC0001)] [Yersinia enterocolitica]

VFG016046(gb|NP\_251103) (pvdH) diaminobutyrate-2-oxoglutarate aminotransferase PvdH [Pyoverdine (VF0094) - Nutritional/Metabolic factor (VFC0001)] [Pseudomonas aeruginosa]

VFG015551(gb|NP\_248741) (phzH) phenazine-modifying enzyme [Pyocyanin (VF0100) - Nutritional/Metabolic factor (VFC0001)] [Pseudomonas aeruginosa]

VFG041327(gb|WP\_010948034) (lem22) Dot/Icm type IV secretion system effector Lem22 [Dot/Icm T4SS secretion system (VF0001) - Adherence (VFC0001)] [Yersinia enterocolitica]

VFG002186(gb|WP\_002387129) (cpsE) glycosyl transferase, group 2 family protein [Capsule (VF0361) - Immunity (VFC0001)] [Yersinia enterocolitica]

VFG022130(gb|NP\_214804) (eccD3) Type IIV secretion system transmembrane protein EccD3 [ESX-3 (VF0521) - Adherence (VFC0001)] [Mycobacterium tuberculosis]

VFG000927(gb|WP\_000096764) (fepE) LPS O-antigen length regulator [Enterobactin (VF0228) - Nutritional/Metabolic factor (VFC0001)] [Enterobacteriaceae]

VFG038875(gb|WP\_005314261) (lfgF) lateral flagellar basal-body rod protein LfgF [Lateral flagella (VF0474) - Motility (VFC0001)] [Vibrio cholerae]

VFG048409(gb|WP\_086074289) (entA) 2,3-dihydroxybenzoate-2,3-dehydrogenase [Ent (VF0562) - Nutritional/Metabolic factor (VFC0001)] [Enterobacteriaceae]

VFG038659(gb|WP\_011705280) (fliN) flagellar motor switch protein FliN [Polar flagella (VF0473) - Motility (VFC0001)] [Vibrio cholerae]

VFG001960(gb|YP\_002344815) (Cj1432c) sugar transferase [Capsule (VF0323) - Immune modulation (VFC025)]

VFG002105(gb|WP\_010947915) (wipC) Dot/Icm type IV secretion system effector WipC [Dot/Icm (VF0156) - Immune modulation (VFC025)]

VFG038768(gb|WP\_016351318) (flgL) flagellar hook-associated protein FlgL [Polar flagella (VF0473) - Motility (VFC001)]

VFG042977(gb|WP\_002379309) (ebpB) endocarditis and biofilm-associated pilus minor subunit EbpB [Ebp pili (VF0566) - Adherence (VFC001)]

VFG048287(gb|WP\_014906962) (fimF) type 1 fimbrial minor component [Type I fimbriae (VF0566) - Adherence (VFC001)]

VFG002395(gb|YP\_007410461) (eccC5) ESX-5 type VII secretion system FtsK/SpoIIIE family protein EccC5 [Type VII secretion system (VF0566) - Adherence (VFC001)]

VFG048606(gb|WP\_004213922) (iucC) aerobactin siderophore biosynthesis protein IucC [Aerobactin (VF0566) - Adherence (VFC001)]

VFG000171(gb|NP\_252921) (pchA) salicylate biosynthesis isochorismate synthase PchA [Pyochelin (VF0095) - Adherence (VFC001)]

VFG000879(gb|WP\_000832235) (fimH) FimH protein precursor [Type 1 fimbriae (VF0221) - Adherence (VFC001)]

VFG000364(gb|WP\_000140406) (ybtA) transcriptional regulator YbtA [Yersiniabactin (VF0136) - Nutritional/Metabolic factor (VFC0272)]

VFG002413(gb|WP\_000389022) (ykgK/ecpR) regulator protein EcpR [ECP (VF0404) - Adherence (VFC0001)]

VFG049040(gb|WP\_074160401) (KP1\_RS17225) glycosyltransferase family 4 protein [LPS (VF0561) - Immune modulation (VFC0258)]

VFG048665(gb|WP\_004176431) (dotU/tssL) type VI secretion system protein, DotU/TssL family [T6SS (VF0566) - Effector delivery system (VFC0086)]

VFG047095(gb|WP\_003014989) (wbtI) DegT/DnrJ/EryC1/StrS family aminotransferase [LPS (VF0542) - Immune modulation (VFC0258)]

VFG002417(gb|WP\_001301550) (yagV/ecpE) E. coli common pilus chaperone EcpE [ECP (VF0404) - Adherence (VFC0001)]

VFG048111(gb|WP\_014367985) (iglC/hcp) Type VI secretion system tube protein, Hcp homolog [T6SS (VF0566) - Effector delivery system (VFC0086)]

VFG000889(gb|WP\_000113351) (papF) P pilus minor subunit PapF [P fimbriae (VF0220) - Adherence (VFC001)]

VFG002173(gb|WP\_010785625) (asa1) aggregation substance Asa1 [AS (VF0352) - Adherence (VFC0001)] [Enterobacteriaceae]

VFG000921(gb|WP\_000189356) (chuY) ChuY [Chu (VF0227) - Nutritional/Metabolic factor (VFC0272)] [Escherichia coli]

VFG000874(gb|WP\_000824100) (fimI) Fimbrin-like protein fimI precursor [Type 1 fimbriae (VF0221) - Adherence (VFC001)]

VFG038383(gb|WP\_011705715) (atsH) Type VI secretion system protein [T6SS (VF0480) - Effector delivery system (VFC0086)]

VFG044199(gb|WP\_003022888) (fslA) IucA/IucC family siderophore biosynthesis protein [Rhizoferrin (VF0551) - Adherence (VFC001)]

VFG042071(gb|WP\_010930810) (BP\_RS11155) hypothetical protein [TTSS (VF0035) - Effector delivery system (VFC0086)]

VFG000231 (pilC) pilus assembly protein [Type IV pili (VF0075) - Adherence (VFC0001)] [Neisseria meningitidis]

VFG038448(gb|WP\_016351632) (tapN) type IV pilus biogenesis protein PilN [Tap type IV pili (VF0475) - Adherence (VFC001)]

VFG049162(gb|WP\_002430641) (clbP) precolibactin peptidase ClbP [Colibactin (VF0573) - Exotoxin (VFC0235)]

VFG000918(gb|WP\_001312167) (chuT) periplasmic heme-binding protein ChuT [Chu (VF0227) - Nutritional/Metabolic factor (VFC0272)]

VFG007946(gb|NP\_217473) (Rv2957) PGL/p-HBAD biosynthesis glycosyltransferase [PDIM (VF0309) - Immune modulation (VFC0258)]

VFG002220(gb|WP\_004686741) (pgm) phosphoglucomutase [LPS (VF0367) - Immune modulation (VFC0258)]

VFG044465(gb|WP\_005478084) (vopZ) type III secretion system effector VopZ [T3SS2 (VF0409) - Effector delivery system (VFC0086)]

VFG000011(gb|WP\_010931648) (ptxA) pertussis toxin subunit 1 precursor [Ptx (VF0026) - Exotoxin (VFC0235)]

VFG044333(gb|WP\_015874968) (fyuA) yersiniabactin receptor FyuA [Ybt (VF0564) - Nutritional/Metabolic factor (VFC0272)]

VFG012603(gb|WP\_001302516) (chuT) periplasmic heme-binding protein ChuT [Chu (VF0234) - Nutritional/Metabolic factor (VFC0272)]

VFG000906(gb|WP\_001142375) (hlyA) Hemolysin A [-Hemolysin (VF0225) - Exotoxin (VFC0235)] [Escherichia coli]

VFG038401(gb|WP\_011705724) (atsQ) Type VI secretion system protein [T6SS (VF0480) - Effector delivery system (VFC0086)]

VFG048508(gb|WP\_012737618) (fes) enterobactin/ferric enterobactin esterase [Ent (VF0562) - Nutritional/Metabolic factor (VFC0272)]

VFG049159(gb|WP\_014907260) (clbM) precolibactin export MATE transporter ClbM [Colibactin (VF0573) - Exotoxin (VFC0235)]

VFG049898(gb|WP\_001284199) (hcp1/tssD1) type VI secretion system protein, Hcp family [T6SS (VF0579) - Effector delivery system (VFC0086)]

VFG001380(gb|NP\_214946) (sodC) superoxide dismutase [SodC (VF0305) - Stress survival (VFC0282)] [Mycobacterium tuberculosis]

VFG038317(gb|WP\_016352170) (tapD/pilD) prepilin peptidase [Tap type IV pili (VF0475) - Adherence (VFC001)]

VFG000139(gb|NP\_253697) (waaG) B-band O-antigen polymerase [LPS (VF0085) - Immune modulation (VFC0258)]

VFG002056 (gspM) general secretion pathway protein M [T2SS (VF0333) - Effector delivery system (VFC0086)]

VFG044326(gb|WP\_001327262) (ybtP) yersiniabactin ABC transporter ATP-binding/permease protein YbtP [Yersiniabactin (VF0136) - Nutritional/Metabolic factor (VFC0272)]

VFG000985(gb|NP\_858259) (ipaD) type III secretion system hydrophilic translocator, needle tip protein IpaD [Type III secretion system (VF0333) - Effector delivery system (VFC0086)]

VFG000358(gb|WP\_002212885) (fyuA/psn) pesticin/yersiniabactin receptor protein [Yersiniabactin (VF0136) - Nutritional/Metabolic factor (VFC0272)]

VFG038707(gb|WP\_016350059) (cheA-2) chemotaxis protein CheA [Polar flagella (VF0473) - Motility (VFC001)]

VFG002051(gb|WP\_001115126) (gspH) general secretion pathway protein H [T2SS (VF0333) - Effector delivery system (VF0333)] [Clostridium difficile (VF0333)]

VFG038576(gb|WP\_016349164) (mshC) MSHA (mannose-sensitive hemagglutinin) pili minor prepilin protein MshC [Type IV pili (VF0401) - Adherence (VFC0001)] [Clostridium difficile (VF0401)]

VFG012095(gb|WP\_003435012) (groEL) chaperonin GroEL [GroEL (VF0594) - Adherence (VFC0001)] [Clostridium difficile (VF0594)]

VFG034875(gb|WP\_001270087) (espX5) Type III secretion system effector EspX5 [TTSS secreted effectors (VF0711) - Effector delivery system (VF0711)] [Clostridium difficile (VF0711)]

VFG045818(gb|WP\_001528154) (tsh) temperature-sensitive protein Tsh [Tsh (VF0233) - Effector delivery system (VF0233)] [Clostridium difficile (VF0233)]

VFG002189(gb|WP\_002359680) (cpsB/cdsA) phosphatidate cytidylyltransferase [Capsule (VF0361) - Immune response (VF0361)] [Clostridium difficile (VF0361)]

VFG034754(gb|WP\_000081129) (espL1) Type III secretion system effector espL1 [TTSS secreted effectors (VF0711) - Effector delivery system (VF0711)] [Clostridium difficile (VF0711)]

VFG045788(gb|WP\_001189322) (cgsG) curli production assembly/transport protein CsgG [Curli fibers (VF1138) - Adherence (VFC0001)] [Clostridium difficile (VF1138)]

VFG050157(gb|WP\_001331698) (kpsF) Polysialic acid capsule expression protein [K1 capsule (VF0239) - Invasion (VF0239)] [Clostridium difficile (VF0239)]

VFG012341(gb|WP\_000767895) (sfaS) S fimbriae minor subunit SfaS [S fimbriae (VF0222) - Adherence (VFC0001)] [Clostridium difficile (VF0222)]

VFG038464(gb|WP\_011707389) (tapT) twitching ATPase [Tap type IV pili (VF0475) - Adherence (VFC0001)] [Clostridium difficile (VF0475)]

VFG002148(gb|NP\_220192) (pkn5) serine/threonine protein kinase [TTSS secreted effectors (VF0711) - Effector delivery system (VF0711)] [Clostridium difficile (VF0711)]

VFG038851(gb|WP\_016350359) (nueB) pseudaminic acid synthase, NeuB [Polar flagella (VF0473) - Motility (VFC0001)] [Clostridium difficile (VF0473)]

VFG002052(gb|WP\_000820136) (gspI) general secretion pathway protein I [T2SS (VF0333) - Effector delivery system (VF0333)] [Clostridium difficile (VF0333)]

VFG000872(gb|WP\_000044711) (fimE) Type 1 fimbriae Regulatory protein fimE [Type 1 fimbriae (VF0221) - Adherence (VFC0001)] [Clostridium difficile (VF0221)]

VFG038568(gb|WP\_016349166) (mshO) MSHA (mannose-sensitive hemagglutinin) pili biogenesis protein MshO [Type IV pili (VF0401) - Adherence (VFC0001)] [Clostridium difficile (VF0401)]

VFG017841(gb|WP\_012105808) (pilQ) type IV pilus biogenesis protein PilQ [Type IV pili (VF0401) - Adherence (VFC0001)] [Clostridium difficile (VF0401)]

VFG038913 (rtxA) multifunctional autoprocessing repeats-in-toxins (MARTX) toxin [RtxA (VF0482) - Exotoxin (VF0482)] [Clostridium difficile (VF0482)]

VFG048755(gb|WP\_049127998) (icmF/tssM) type VI secretion protein TssM [T6SS (VF0569) - Effector delivery system (VF0569)] [Clostridium difficile (VF0569)]

VFG000180(gb|NP\_251791) (xcpT) general secretion pathway protein G [Xcp secretion system (VF0084) - Effector delivery system (VF0084)] [Clostridium difficile (VF0084)]

VFG002278(gb|WP\_011010095) (nagI) hyaluronidase [Mu-toxin (VF0389) - Exoenzyme (VFC0251)] [Clostridium difficile (VF0389)]

VFG002434(gb|WP\_011205650) (pilN) type IV pilus inner membrane platform protein PilN [Type IV pili (VF0401) - Adherence (VFC0001)] [Clostridium difficile (VF0401)]

VFG001007(gb|NP\_858281) (spa15) type III secretion system chaperone [TTSS (VF0118) - Effector delivery system (VF0118)] [Clostridium difficile (VF0118)]

VFG041278(gb|WP\_010947155) (vpdC) Dot/Icm type IV secretion system effector VpdC [Dot/Icm T4SS secreted effectors (VF0711) - Effector delivery system (VF0711)] [Clostridium difficile (VF0711)]

VFG050802(gb|WP\_000865310.1) (gspG) general secretion pathway protein G [T2SS (VF1335) - Effector delivery system (VF1335)] [Clostridium difficile (VF1335)]

VFG012615(gb|WP\_000020049) (chuX) putative heme-binding protein ChuX [Chu (VF0234) - Nutritional/Metabolic factor (VF0234)] [Clostridium difficile (VF0234)]

VFG038403(gb|WP\_011705726) (atsS) Type VI secretion system protein [T6SS (VF0480) - Effector delivery system (VF0480)] [Clostridium difficile (VF0480)]

VFG002072(gb|NP\_248776) (hsiE1) type VI secretion system hcp secretion island protein HsiE1, interacting with Hcp [T6SS (VF0480) - Effector delivery system (VF0480)] [Clostridium difficile (VF0480)]

VFG000114(gb|NP\_253218) (xcpA/pilD) type 4 prepilin peptidase PilD [Type IV pili (VF0082) - Adherence (VFC0001)] [Clostridium difficile (VF0082)]

VFG002195(gb|WP\_002399773) (EF0818) polysaccharide lyase, family 8 [Hyaluronidase (VF0359) - Exoenzyme (VFC0251)] [Clostridium difficile (VF0359)]

VFG038635(gb|WP\_016350051) (fliH) flagellar assembly protein FliH [Polar flagella (VF0473) - Motility (VFC0001)] [Clostridium difficile (VF0473)]

VFG038505(gb|WP\_011705643) (tapF) type IV pilus biogenesis/stability protein, pilW-like [Tap type IV pili (VF0475) - Adherence (VFC0001)] [Clostridium difficile (VF0475)]

VFG044330(gb|WP\_032447695) (ybtU) yersiniabactin biosynthesis oxidoreductase YbtU [Ybt (VF0564) - Nutritional/Metabolic factor (VF0564)] [Clostridium difficile (VF0564)]

VFG041021(gb|NP\_250354) (PA1663) transcriptional regulator [HSI-2 (VF0943) - Effector delivery system (VF0943)] [Clostridium difficile (VF0943)]

VFG038687(gb|WP\_016350057) (flhF) flagellar biosynthesis protein FlhF [Polar flagella (VF0473) - Motility (VFC0001)] [Clostridium difficile (VF0473)]

VFG044084(gb|NP\_251073) (PA2383) transcriptional regulator [Pyoverdine (VF0094) - Nutritional/Metabolic factor (VF0094)] [Clostridium difficile (VF0094)]

VFG050245(gb|NP\_219732) (CT\_227) inclusion membrane protein [TTSS secreted effectors (VF0711) - Effector delivery system (VF0711)] [Clostridium difficile (VF0711)]

VFG022051(gb|NP\_214798) (eccC3) Type VII secretion system protein EccC3 [ESX-3 (VF0521) - Effector delivery system (VF0521)] [Clostridium difficile (VF0521)]

VFG038342(gb|WP\_005320770) (ascV) Type III secretion system inner membrane export apparatus protein AscV [Type III secretion system (VF0333) - Effector delivery system (VF0333)] [Clostridium difficile (VF0333)]

VFG000615(gb|NP\_709454) (iucA) aerobactin synthesis protein IucA [Aerobactin (VF0123) - Nutritional/Metabolic factor (VF0123)] [Clostridium difficile (VF0123)]

VFG038387(gb|WP\_011705717) (atsJ) Type VI secretion system protein [T6SS (VF0480) - Effector delivery system (VF0480)] [Clostridium difficile (VF0480)]

VFG000545(gb|NP\_461805) (sipC/sspC) type III secretion system hydrophilic translocator, pore protein SipC [Type III secretion system (VF0333) - Effector delivery system (VF0333)] [Clostridium difficile (VF0333)]

VFG049155(gb|WP\_000829570) (clbI) colibactin polyketide synthase ClbI [Colibactin (VF0573) - Exotoxin (VF0573)] [Clostridium difficile (VF0573)]

VFG047860(gb|WP\_003022130) (iglF/clpV) Type VI secretion system secreted protein IglF [T6SS (VF0544) - Effector delivery system (VF0544)] [Clostridium difficile (VF0544)]

VFG000165(gb|NP\_252915) (pchF) pyochelin synthetase PchF [Pyochelin (VF0095) - Nutritional/Metabolic factor (VF0095)] [Clostridium difficile (VF0095)]

VFG038497(gb|WP\_016351992) (tppF) type IV pilus pseudopilin [Tap type IV pili (VF0475) - Adherence (VFC0001)] [Clostridium difficile (VF0475)]

VFG002438(gb|WP\_011205635) (bprC) AraC family transcriptional regulator, regulates basal T6SS1 expression [T6SS1 (VF0429) - Effector delivery system (VFC0001)]

VFG034849(gb|WP\_000129338) (espX1) Type III secretion system effector EspX1 [TTSS secreted effectors (VF0429) - Effector delivery system (VFC0001)]

VFG039952(gb|WP\_011190507) (rvhB6a) VirB6-like protein of the type IV secretion system [Rvh T4SS (VF0429) - Effector delivery system (VFC0001)]

VFG038651(gb|WP\_011705278) (fliL) flagellar basal body-associated protein FliL [Polar flagella (VF0473) - Motility (VFC0204)]

VFG001943(gb|YP\_002344535) (neuC1) UDP-N-acetylglucosamine 2-epimerase [LOS (VF0326) - Immune modulation (VFC0001)]

VFG044172(gb|WP\_000622316) (chuV) ATP-binding hydrophilic protein ChuV [Chu (VF0227) - Nutritional/Metabolic factor (VFC0272)]

VFG034624(gb|WP\_000755097) (cfaB) colonization factor antigen 1 [Adhesive fimbriae (VF0213) - Adherence (VFC0001)]

VFG045296(gb|WP\_164919819) (LPG\_RS03710) N-acetyl sugar amidotransferase [LPS (VF0171) - Immune modulation (VFC0001)]

VFG041118(gb|WP\_045606108) (tssA-5) Type VI secretion system protein TssA [T6SS-1 (VF0429) - Effector delivery system (VFC0001)]

VFG000938(gb|WP\_001015709) (iucC) aerobactin siderophore biosynthesis protein IucC [Aerobactin (VF0229) - Nutritional/Metabolic factor (VFC0272)]

VFG000618(gb|NP\_709457) (iucD) aerobactin synthesis protein IucC, lysine 6-monooxygenase [Aerobactin (VF0229) - Nutritional/Metabolic factor (VFC0272)]

VFG038176(gb|WP\_000777882) (ompA) outer membrane protein OmpA [OmpA (VF0464) - Immune modulation (VFC0001)]

VFG012591(gb|WP\_001017167) (chuS) heme oxygenase ChuS [Chu (VF0234) - Nutritional/Metabolic factor (VFC0272)]

VFG001354(gb|WP\_000728269) (pce/cbpE) choline binding protein E [CBPs (VF0145) - Adherence (VFC0001)]

VFG002424(gb|WP\_011205626) (bimA) YadA family of bacterial autotransporter mediating actin tail formation [YadA (VF0564) - Nutritional/Metabolic factor (VFC0272)]

VFG044327(gb|WP\_000140406) (ybta) yersiniabactin transcriptional regulator YbtA [Ybt (VF0564) - Nutritional/Metabolic factor (VFC0272)]

VFG044159(gb|WP\_000125846) (fes) enterobactin/ferric enterobactin esterase [Enterobactin (VF0228) - Nutritional/Metabolic factor (VFC0272)]

VFG037807(gb|WP\_000013434) (lpxB) lipid-A-disaccharide synthase [LPS (VF0466) - Immune modulation (VFC0001)]

VFG012621(gb|WP\_000189352) (chuY) ChuY [Chu (VF0234) - Nutritional/Metabolic factor (VFC0272)] [Escherichia coli (VF0234) - Nutritional/Metabolic factor (VFC0272)]

VFG001408(gb|NP\_217456) (mas) multifunctional mycocerosic acid synthase [PDIM (VF0309) - Immune modulation (VFC0001)]

VFG039121(gb|NP\_820607) (icmC/dotE) Type IVB secretion system protein IcmC [Dot/Icm T4SS (VF0503) - Effector delivery system (VFC0001)]

VFG012597(gb|WP\_000089593) (chuA) Outer membrane heme/hemoglobin receptor ChuA [Chu (VF0234) - Nutritional/Metabolic factor (VFC0272)]

VFG001267(gb|NP\_252913) (pchH) ABC transporter ATP-binding protein [Pyochelin (VF0095) - Nutritional/Metabolic factor (VFC0272)]

VFG002269(gb|WP\_011181342) (trwD) Trw type IV secretion system VirB11 homolog, trwD protein [Trw type IV secretion system (VF0429) - Effector delivery system (VFC0001)]

VFG051134(gb|WP\_002969669.1) (btaE) Trimeric autotransporter adhesin, YadA-like family protein [BtaE (VF0564) - Nutritional/Metabolic factor (VFC0272)]

VFG038703(gb|WP\_011705289) (cheZ) chemotaxis protein CheZ [Polar flagella (VF0473) - Motility (VFC0204)]

VFG002282(gb|WP\_041707714) (cloSI) alpha-clostripain [Alpha-clostripain (VF0390) - Exoenzyme (VFC0251)]

VFG046628(gb|WP\_003020689) (FTT\_RS04105) sugar transferase [Capsule (VF0543) - Immune modulation (VFC0001)]

VFG001409(gb|NP\_217457) (fadD28) long-chain-fatty-acid--AMP ligase FadD28 [PDIM (VF0309) - Immune modulation (VFC0001)]

VFG034648(gb|WP\_001245988) (cfaD/cfaE) minor pilin and initiator [Adhesive fimbriae (VF0213) - Adherence (VFC0001)]

VFG048277(gb|WP\_009308599) (fimD) outer membrane usher protein [Type I fimbriae (VF0566) - Adherence (VFC0001)]

VFG038395(gb|WP\_011705721) (clpB) type VI secretion system ATPase ClpV1 [T6SS (VF0480) - Effector delivery system (VFC0001)]

VFG000348(gb|WP\_005694042) (hxcC) heme-hemopexin utilization protein C, haem receptor [HxuABC (VF0229) - Nutritional/Metabolic factor (VFC0272)]

VFG043627(gb|WP\_000756959) (mrkA) type 3 fimbrial major pilin subunit MrkA [Type 3 fimbriae (VF0567) - Adherence (VFC0001)]

VFG042566(gb|WP\_011076307) (sfaC) S/F1C fimbrial major subunit operon transcriptional regulator [F1C fimbriae (VF0567) - Adherence (VFC0001)]

VFG049118(gb|WP\_012737529) (allR) DNA-binding transcriptional repressor AllR [Allantoin utilization (VF0567) - Nutritional/Metabolic factor (VFC0272)]

VFG038804(gb|WP\_011706643) (flgC) flagellar basal body rod protein FlgC [Polar flagella (VF0473) - Motility (VFC0204)]

VFG013070(gb|WP\_001626196) (shuV) ATP-binding component of hemin transport system [Shu (VF0256) - Nutritional/Metabolic factor (VFC0272)]

VFG011671(gb|YP\_002344801) (Cj1418c) hypothetical protein [Capsule (VF0323) - Immune modulation (VFC0001)]

VFG050169(gb|WP\_000124301) (kpsM) Polysialic acid transport protein [K1 capsule (VF0239) - Invasion (VFC0001)]

VFG038631(gb|WP\_011705273) (fliG) flagellar motor switch protein G [Polar flagella (VF0473) - Motility (VFC0204)]

VFG041025(gb|NP\_250358) (PA1667) hypothetical protein [HSI-2 (VF0943) - Effector delivery system (VFC0001)]

VFG038047(gb|WP\_000994240) (ACICU\_RS00460) hypothetical protein [Capsule (VF0465) - Immune modulation (VFC0001)]

VFG045459 (APH\_RS05665\*) P44/Msp2 family outer membrane protein [P44/Msp2 family (VF0520) - Immune modulation (VFC0001)]

VFG051111(gb|YP\_001084320.1) (tse3) T6SS effector Tse3, unknown function [T6SS secreted effectors (VF133) - Effector delivery system (VFC0001)]

VFG045635(gb|WP\_002296629) (sgrA) cell wall anchored protein SgrA [SgrA (VF0540) - Adherence (VFC0001)]

VFG043014(gb|NP\_250149) (PA1458) two-component sensor [Flagella (VF0273) - Motility (VFC0204)] [Pseudomonas aeruginosa]

VFG001231(gb|NP\_249104) (chpA) still frameshift probable component of chemotactic signal transduction system [ChpA (VF0273) - Motility (VFC0204)] [Pseudomonas aeruginosa]

VFG000940(gb|WP\_001299620) (iucA) aerobactin siderophore biosynthesis protein IucD [Aerobactin (VF0229) - Nutritional/Metabolic (VFC0001)] [Aeromonas hydrophila]

VFG002096(gb|WP\_010946675) (lidA) Dot/Icm type IV secretion system effector LidA, interacting with Rab GTPase [Dot/Icm T4SS secreted protein (VF0228) - Nutritional/Metabolic (VFC0001)] [Yersinia enterocolitica]

VFG002414(gb|WP\_000730972) (yagZ/ecpA) E. coli common pilus structural subunit EcpA [ECP (VF0404) - Adherence (VFC0001)] [Escherichia coli]

VFG038397(gb|WP\_011705722) (vasH) sigma-54 dependent transcriptional regulator [T6SS (VF0480) - Effector delivery system (VFC0001)] [Yersinia enterocolitica]

VFG000192(gb|NP\_250388) (pscN) type III secretion system ATPase PscN [TTSS (VF0083) - Effector delivery system (VFC0001)] [Yersinia enterocolitica]

VFG037650 (pgaA) poly-beta-1,6 N-acetyl-D-glucosamine export porin PgaA [PNAG (VF0472) - Biofilm (VFC0001)] [Pseudomonas aeruginosa]

VFG038369(gb|WP\_011705706) (hcp) hemolysin co-regulated protein [T6SS (VF0480) - Effector delivery system (VFC0001)] [Yersinia enterocolitica]

VFG043392(gb|YP\_002343698) (eptC) phosphoethanolamine transferase [Flagella (VF0114) - Motility (VFC0204)] [Pseudomonas aeruginosa]

VFG000926(gb|WP\_001443194) (fepD) ferrienterobactin ABC transporter permease [Enterobactin (VF0228) - Nutritional/Metabolic (VFC0001)] [Yersinia enterocolitica]

VFG001445(gb|AAA92657) (AAA92657) unknown protein [TraJ (VF0241) - Invasion (VFC0083)] [Escherichia coli]

VFG050037(gb|WP\_001133943) (dhbF) non-ribosomal peptide synthetase, DhbF [Bacillibactin (VF0586) - Nutritional/Metabolic (VFC0001)] [Bacillus subtilis]

VFG048771(gb|WP\_004190505) (tssF) type VI secretion system baseplate subunit TssF [T6SS (VF0569) - Effector delivery system (VFC0001)] [Yersinia enterocolitica]

VFG045632(gb|WP\_002286924) (ecbA/fss3) Collagen binding MSCRAMM, EcbA/Fss3 [EcbA (VF0539) - Adherence (VFC0001)] [Yersinia enterocolitica]

VFG002045(gb|WP\_010930608) (bvgS) virulence factors two-component system sensor histidine kinase BvgS [Type 3 fimbriae (VF0224) - Adherence (VFC0001)] [Yersinia enterocolitica]

VFG000876(gb|WP\_000120946) (fimD) Outer membrane usher protein fimD precursor [Type 1 fimbriae (VF0228) - Adherence (VFC0001)] [Yersinia enterocolitica]

VFG000931(gb|WP\_001336900) (entC) isochorismate synthase 1 [Enterobactin (VF0228) - Nutritional/Metabolic (VFC0001)] [Yersinia enterocolitica]

VFG010749(gb|WP\_010945896) (sdhB) Dot/Icm type IV secretion system effector SdhB [Dot/Icm T4SS secreted protein (VF0228) - Nutritional/Metabolic (VFC0001)] [Yersinia enterocolitica]

VFG034679(gb|WP\_000074207) (ibeB) Cu(+)/Ag(+) efflux RND transporter outer membrane channel CusC [Iberin (VF0228) - Nutritional/Metabolic (VFC0001)] [Yersinia enterocolitica]

VFG037664(gb|WP\_001061322) (pgaB) poly-beta-1,6-N-acetyl-D-glucosamine N-deacetylase PgaB [PNAG (VF0472) - Biofilm (VFC0001)] [Pseudomonas aeruginosa]

VFG000163(gb|NP\_251088) (fpvA) ferripyoverdine receptor FpvA [Pyoverdine (VF0094) - Nutritional/Metabolic (VFC0001)] [Pseudomonas aeruginosa]

VFG048797(gb|WP\_004175261) (ugd) UDP-glucose 6-dehydrogenase [Capsule (VF0560) - Immune modulation (VFC0001)] [Yersinia enterocolitica]

VFG002507(gb|WP\_004534277) (flgA) flagellar basal body P-ring biosynthesis protein FlgA [Flagella (VF0430) - Motility (VFC0204)] [Yersinia enterocolitica]

VFG002070(gb|NP\_248774) (hsiC1/vipB/tssC) type VI secretion system tubule-forming protein VipB [HSI-I (VF0569) - Effector delivery system (VFC0001)] [Yersinia enterocolitica]

VFG050625(gb|WP\_000389061.1) (pilG) twitching motility response regulator PilG [TFP (VF1334) - Adherence (VFC0001)] [Yersinia enterocolitica]

VFG050670(gb|WP\_000505931.1) (pilJ) methyl-accepting chemotaxis protein [TFP (VF1334) - Adherence (VFC0001)] [Yersinia enterocolitica]

VFG002159(gb|NP\_464601) (aut) autolysin [Auto (VF0348) - Invasion (VFC0083)] [Listeria monocytogenes EC42228]

VFG038409(gb|WP\_011704492) (fimA) fimbrial protein [Type I pili (VF0486) - Adherence (VFC0001)] [Aeromonas hydrophila]

VFG042568(gb|WP\_000012016) (sfaY) transcriptional regulator SfaY [F1C fimbriae (VF0224) - Adherence (VFC0001)] [Yersinia enterocolitica]

VFG049904 (clpV/tssH) Type VI secretion system ATPase ClpV/TssH [T6SS (VF0579) - Effector delivery system (VFC0001)] [Yersinia enterocolitica]

VFG046582(gb|WP\_003023398) (acpC) acid phosphatase [Acid phosphatase (VF0547) - Stress survival (VFC0204)] [Yersinia enterocolitica]

VFG040863(gb|WP\_011190526) (sca2) cell surface antigen Sca2 [Sca2 (VF0495) - Motility (VFC0204)] [Rickettsia solis]

VFG050159(gb|WP\_001331697) (kpsD) Polysialic acid transport protein precursor [K1 capsule (VF0239) - Invasion (VFC0083)] [Yersinia enterocolitica]

VFG048327(gb|WP\_004152886) (mrkH) transcriptional activator [Type 3 fimbriae (VF0567) - Biofilm (VFC0204)] [Yersinia enterocolitica]

VFG001880(gb|WP\_010947251) (pilB) type IV pilus assembly protein PilB [Type IV pili (VF0155) - Adherence (VFC0001)] [Yersinia enterocolitica]

VFG000167(gb|NP\_252917) (pchR) transcriptional regulator PchR [Pyochelin (VF0095) - Nutritional/Metabolic (VFC0001)] [Yersinia enterocolitica]

VFG045790(gb|WP\_000833288) (cgsE) curli production assembly/transport protein CsgE [Curli fibers (VF1138) - Biofilm (VFC0204)] [Yersinia enterocolitica]

VFG000920(gb|WP\_000020034) (chuX) putative heme-binding protein ChuX [Chu (VF0227) - Nutritional/Metabolic (VFC0001)] [Yersinia enterocolitica]

VFG001283(gb|WP\_000794648) (fnbA) fibronectin-binding protein A [FnBPs (VF0010) - Adherence (VFC0001)] [Yersinia enterocolitica]

VFG001241(gb|NP\_249774) (flgH) flagellar L-ring protein precursor FlgH [Flagella (VF0273) - Motility (VFC0204)] [Yersinia enterocolitica]

VFG002446(gb|WP\_011205636) (bapA) Type III secretion system secreted protein BapA [Bsa T3SS (VF0428) - Effector delivery system (VFC0001)] [Yersinia enterocolitica]

VFG000166(gb|NP\_252916) (pchE) dihydroaeruginosic acid synthetase PchE [Pyochelin (VF0095) - Nutritional/Metabolic (VFC0001)] [Yersinia enterocolitica]

VFG002048(gb|WP\_000249362) (gspE) general secretion pathway protein E [T2SS (VF0333) - Effector delivery system (VFC0001)] [Yersinia enterocolitica]

VFG000861(gb|WP\_001045649) (pic) Pic serine protease precursor, autotransporter [Pic (VF0218) - Effector delivery system (VFC0001)] [Yersinia enterocolitica]

VFG041018(gb|NP\_250351) (PA1660) hypothetical protein [HSI-2 (VF0943) - Effector delivery system (VFC0001)] [Yersinia enterocolitica]

VFG039088(gb|WP\_011451002) (aipA) Anaplasma invasion protein A [AipA (VF0501) - Invasion (VFC0083)]

VFG000929(gb|WP\_001375021) (entD) phosphopantetheinyl transferase component of enterobactin synthase mu

VFG002530(gb|WP\_004199265) (cheW) chemotaxis protein CheW [Flagella (VF0430) - Motility (VFC0204)] [I

VFG049163(gb|WP\_000065646) (clbQ) colibactin biosynthesis thioesterase ClbQ [Colibactin (VF0573) - Exoto

VFG048419(gb|WP\_004210873) (entB) 2,3-dihydro-2,3-dihydroxybenzoate synthetase, isochroismatase [Ent (V

VFG038784(gb|WP\_011706638) (flgH) flagellar basal body L-ring protein [Polar flagella (VF0473) - Motility (V

VFG051158(gb|WP\_004683443.1) (bspB) type IV secretion system effector BspB [T4SS secreted effectors (VF0

VFG011826(gb|YP\_002343512) (fliK) flagellar hook-length control protein FliK [Flagella (VF0114) - Motility (

VFG043775(gb|BAB86845) (bont) botulinum neurotoxin, BoNT [BoNT (VF0375) - Exotoxin (VFC0235)] [Clos

VFG038301(gb|WP\_016349342) (exeK) general secretion pathway protein K [Exe T2SS (VF0478) - Effector del

VFG002053(gb|WP\_001250462) (gspJ) general secretion pathway protein J [T2SS (VF0333) - Effector delivery

VFG041038(gb|NP\_251056) (PA2366) uricase [HSI-3 (VF0944) - Effector delivery system (VFC0086)] [Pseudo

VFG014486(gb|NP\_250133) (fliL) flagellar basal body protein FliL [Flagella (VF0273) - Motility (VFC0204)] [I

VFG002188(gb|WP\_002362618) (cpsC) teichoic acid biosynthesis protein, putative [Capsule (VF0361) - Immune

VFG000001(gb|WP\_010930610) (fhaB) filamentous hemagglutinin/adhesin [FHA (VF0025) - Adherence (VFC0

VFG038607(gb|WP\_016349154) (mshJ) MSHA (mannose-sensitive hemagglutinin) pili biogenesis protein MshJ

VFG000919(gb|WP\_001095619) (chuW) Putative oxygen independent coproporphyrinogen III oxidase [Chu (VF

VFG037456(gb|WP\_000160878) (bauF) siderophore-interacting protein [Acinetobactin (VF0467) - Nutritional/M

VFG031564(gb|YP\_177826) (PE\_PGRS30) PE-PGRS family protein PE\_PGRS30 [PE/PE-PGRS (VF0316) - Im

VFG038331(gb|WP\_005320790) (exsD) Type III secretion system protein ExsD [T3SS (VF0479) - Effector deliv

VFG041427(gb|WP\_143343646) (CBUD\_RS08635) ankyrin repeat domain-containing protein [T4SS secreted ef

VFG002064(gb|NP\_248768) (dotU1) type VI secretion system protein DotU [HSI-I (VF0334) - Effector delivery

VFG049120(gb|WP\_012737535) (allB) allantoinase [Allantion utilization (VF0572) - Nutritional/Metabolic facto

VFG002178(gb|AAM75254) (cylI) cytolysin immunity protein [Cytolysin (VF0356) - Exotoxin (VFC0235)] [En

VFG002176(gb|AAM75252) (cylB) ABC-type transporter [Cytolysin (VF0356) - Exotoxin (VFC0235)] [Enteroc

VFG038265(gb|WP\_016352108) (exeB) general secretion pathway protein B [Exe T2SS (VF0478) - Effector del

VFG002223(gb|WP\_004686778) (pmm) phosphomannomutase [LPS (VF0367) - Immune modulation (VFC0258

VFG002529(gb|WP\_011205290) (tsr) methyl-accepting chemotaxis protein I [Flagella (VF0430) - Motility (VFC

VFG038452(gb|WP\_016351631) (tapO) type IV pilus biogenesis protein PilO [Tap type IV pili (VF0475) - Adhe

VFG038273(gb|WP\_016349335) (exeD) general secretion pathway protein D [Exe T2SS (VF0478) - Effector del

VFG041047(gb|NP\_252174) (tse3) type VI secretion system effector Tse3, glycoside hydrolase [HSI-I T6SS sec

VFG049905(gb|WP\_000343289) (tssL) Type VI secretion system protein TssL [T6SS (VF0579) - Effector deliv

VFG001446(gb|WP\_000768218) (sfaA) S-fimbrial major subunit SfaA [S fimbriae (VF0222) - Adherence (VFC

VFG001262(gb|NP\_250140) (flhB) flagellar biosynthetic protein FlhB [Flagella (VF0273) - Motility (VFC0204)

VFG038828(gb|WP\_011706649) (flgN) flagellar protein FlgN [Polar flagella (VF0473) - Motility (VFC0204)] [A

VFG048307(gb|WP\_041937815) (fimH) type 1 fimbrial adhesin precursor [Type I fimbriae (VF0566) - Adherence

VFG049910(gb|WP\_000348788) (tssG) Type VI secretion system protein TssG [T6SS (VF0579) - Effector deliv

VFG050166(gb|WP\_000066003) (neuB) N-acylneuraminate-9-phosphate synthase [K1 capsule (VF0239) - Invas

VFG000140(gb|NP\_253696) (waaP) UDP-glucose:(heptosyl) LPS alpha 1,3-glucosyltransferase WaaG [LPS (VF

VFG034873(gb|WP\_001270084) (espX5) Type III secretion system effector EspX5 [TTSS secreted effectors (VF

VFG043016(gb|NP\_250155) (PA1464) purine-binding chemotaxis protein [Flagella (VF0273) - Motility (VFC02

VFG002416(gb|WP\_001265657) (yagW/ecpD) polymerized tip adhesin of ECP fibers [ECP (VF0404) - Adherence

VFG045792(gb|WP\_000791650) (csgB) curlin minor subunit CsgB [Curli fibers (VF1138) - Adherence (VFC00

VFG045793(gb|WP\_000771429) (csgA) curlin major subunit CsgA [Curli fibers (VF1138) - Adherence (VFC00

VFG050757(gb|WP\_001166319.1) (gspE1) general secretion pathway protein E [T2SS (VF1335) - Effector deliv

VFG001892(gb|YP\_002343523) (fliY) flagellar motor switch protein FliY [Flagella (VF0114) - Motility (VFC02



VFG000477(gb|NP\_461845) (*rpoS*) RNA polymerase sigma factor RpoS [RpoS (VF0112) - Regulation (VFC030)]

VFG048429(gb|WP\_004183353) (*entE*) enterobactin synthase subunit E [Ent (VF0562) - Nutritional/Metabolic factor (VFC0258)]

VFG038864(gb|WP\_073531776) (*fliF*) flagellar MS-ring protein [Lateral flagella (VF0474) - Motility (VFC0204)]

VFG038385(gb|WP\_011705716) (*atsI*) Type VI secretion system protein [T6SS (VF0480) - Effector delivery system (VFC0258)]

VFG048787(gb|WP\_004176417) (*sciN/tssJ*) type VI secretion system lipoprotein TssJ [T6SS (VF0569) - Effector delivery system (VFC0258)]

VFG038615(gb|WP\_016349152) (*mshI*) MSHA (mannose-sensitive hemagglutinin) pili biogenesis protein MshI [Pili (VF0220) - Adherence (VFC0001)]

VFG013260(gb|WP\_010868968) (*lgtC*) glycosyltransferase [LOS (VF0044) - Immune modulation (VFC0258)]

VFG050163(gb|WP\_000197083) (*neuE*) polysialic acid biosynthesis protein [K1 capsule (VF0239) - Invasion (VFC0258)]

VFG000936(gb|WP\_016265865) (*iutA*) ferric aerobactin receptor precursor IutA [Aerobactin (VF0229) - Nutritional/Metabolic factor (VFC0258)]

VFG000925(gb|WP\_000140634) (*fepC*) ferrienterobactin ABC transporter ATPase [Enterobactin (VF0228) - Nutritional/Metabolic factor (VFC0258)]

VFG012501(gb|WP\_000271272) (*iroE*) esterase [Salmochelin siderophore (VF0230) - Nutritional/Metabolic factor (VFC0258)]

VFG013064(gb|WP\_000089574) (*shuA*) outer membrane heme/hemoglobin receptor ShuA [Shu (VF0256) - Nutritional/Metabolic factor (VFC0258)]

VFG044322(gb|WP\_004190148) (*iroE*) siderophore esterase IroE [Sal (VF0563) - Nutritional/Metabolic factor (VFC0258)]

VFG041096(gb|NP\_459269) (STM0272) ClpV1 family T6SS ATPase [SCI (Salmonella centrisome island) (VF0974) - Effector delivery system (VFC0258)]

VFG050300(gb|NP\_250641) (*fapF*) outer membrane secretin FapF [Fap (VF1191) - Adherence (VFC0001)] [Pseudomonas (VF0220) - Adherence (VFC0001)]

VFG038293(gb|WP\_016349340) (*exeI*) general secretion pathway protein I [Exe T2SS (VF0478) - Effector delivery system (VFC0258)]

VFG001822(gb|NP\_216897) (*mbtD*) Polyketide synthetase MbtD (polyketide synthase) [Mycobactin (VF0299) - Nutritional/Metabolic factor (VFC0258)]

VFG002406(gb|WP\_000728972) (*esaA*) type VII secretion system protein EsaA [Type VII secretion system (VF0220) - Adherence (VFC0001)]

VFG002074(gb|NP\_248778) (*hsiG1/tssF*) type VI secretion system hcp secretion island protein HsiG1 [HSI-I (VF0220) - Adherence (VFC0001)]

VFG048708(gb|WP\_041168969) (*vgrG/tssI*) type VI secretion system tip protein VgrG [T6SS (VF0569) - Effector delivery system (VFC0258)]

VFG038380(gb|WP\_043163044) (*vipB*) Type VI secretion system contractile sheath large subunit TssC/VipB [T6SS (VF0480) - Effector delivery system (VFC0258)]

VFG013342(gb|WP\_010869051) (*lpsA*) glycosyltransferase [LOS (VF0044) - Immune modulation (VFC0258)]

VFG038533(gb|WP\_016350152) (*flpF*) traffic ATPase [Flp type IV pili (VF0476) - Adherence (VFC0001)] [Aeromonas (VF0220) - Adherence (VFC0001)]

VFG038627(gb|WP\_016350050) (*fliF*) flagellar MS-ring protein [Polar flagella (VF0473) - Motility (VFC0204)]

VFG038378(gb|WP\_011705712) (*vipA*) Type VI secretion system contractile sheath small subunit TssB/VipA [T6SS (VF0480) - Effector delivery system (VFC0258)]

VFG038402(gb|WP\_011705725) (*vasK/icmF*) Type VI secretion system protein [T6SS (VF0480) - Effector delivery system (VFC0258)]

VFG049148(gb|WP\_041168941) (*clbB*) colibactin hybrid non-ribosomal peptide synthetase/type I polyketide synthase [Colibactin (VF0220) - Adherence (VFC0001)]

VFG034851(gb|WP\_000129342) (*espX1*) Type III secretion system effector EspX1 [TTSS secreted effectors (VF0035) - Effector delivery system (VFC0258)]

VFG000064(gb|WP\_010930831) (*bcrD*) Type III secretion system LcrD homolog protein BcrD [TTSS (VF0035) - Effector delivery system (VFC0258)]

VFG038305(gb|WP\_016349343) (*exeL*) general secretion pathway protein L [Exe T2SS (VF0478) - Effector delivery system (VFC0258)]

VFG001250(gb|NP\_249791) (*fliE*) flagellar hook-basal body complex protein FliE [Flagella (VF0273) - Motility (VFC0204)]

VFG001308(gb|WP\_001291010) (*cap8L*) type 8 capsular polysaccharide synthesis protein Cap8L [Capsule (VF0239) - Invasion (VFC0258)]

VFG000195(gb|NP\_250391) (*pcr2*) type III secretion system protein Pcr2 [TTSS (VF0083) - Effector delivery system (VFC0258)]

VFG000363(gb|WP\_002212775) (*irp2*) yersiniabactin biosynthetic protein Irp2 [Yersiniabactin (VF0136) - Nutritional/Metabolic factor (VFC0258)]

VFG050457(gb|WP\_001274990.1) (*pilB*) type IV-A pilus assembly ATPase PilB [TFP (VF1334) - Adherence (VFC0001)]

VFG038808(gb|WP\_011706644) (*flgB*) flagellar basal-body rod protein FlgB [Polar flagella (VF0473) - Motility (VFC0204)]

VFG038525(gb|WP\_043118801) (*flpH*) Flp pilus assembly protein FlpH [Flp type IV pili (VF0476) - Adherence (VFC0001)]

VFG000881(gb|WP\_000930062) (*papB*) regulatory protein PapB [P fimbriae (VF0220) - Adherence (VFC0001)]

VFG016463(gb|WP\_011206020) (*p97*) protein p97; cilium adhesin [P97/P102 paralog family (VF0426) - Adherence (VFC0001)]

VFG044098(gb|NP\_252910) (PA4220) hypothetical protein [Pyochelin (VF0095) - Nutritional/Metabolic factor (VFC0258)]

VFG038381(gb|WP\_011705714) (*atsG*) Type VI secretion system protein [T6SS (VF0480) - Effector delivery system (VFC0258)]

VFG038723(gb|WP\_011705294) (AHML\_RS07540) CobQ/CobB/MinD/ParA family protein [Polar flagella (VF0473) - Motility (VFC0204)]

VFG038772(gb|WP\_016351319) (*flgK*) flagellar hook-associated protein FlgK [Polar flagella (VF0473) - Motility (VFC0204)]

VFG049084(gb|WP\_004175264) (*rfbB*) O-antigen export ABC transporter ATP-binding protein RfbB [LPS (VF0239) - Invasion (VFC0258)]

VFG041091(gb|NP\_459264) (STM0267) *sciB* domain protein [SCI (Salmonella centrisome island) (VF0974) - Effector delivery system (VFC0258)]

VFG000933(gb|WP\_001007140) (*entB*) isochorismatase [Enterobactin (VF0228) - Nutritional/Metabolic factor (VFC0258)]

VFG042965(gb|WP\_004188396) (pilP) type IV pilus biogenesis protein PilP [Type IV pili (VF0431) - Adherence (VFC0001)]

VFG000188(gb|NP\_250384) (pscR) type III secretion system protein PscR [TTSS (VF0083) - Effector delivery system (VFC0001)]

VFG043626(gb|WP\_000820818) (mrkB) fimbrial chaperone protein mrkB precursor [Type 3 fimbriae (VF0567) - Adherence (VFC0001)]

VFG050165(gb|WP\_001259305) (neuA) N-acetylneuraminic acid cytidyltransferase [K1 capsule (VF0239) - Invasion (VFC0001)]

VFG000937(gb|WP\_000750139) (iucD) L-lysine 6-monooxygenase IucD [Aerobactin (VF0229) - Nutritional/Metabolic factor (VFC0001)]

VFG038155(gb|WP\_000209960) (ACICU\_RS00500) phosphomannomutase/phosphoglucomutase [Capsule (VF0001) - Adherence (VFC0001)]

VFG041040(gb|NP\_251058) (PA2368) hypothetical protein [HSI-3 (VF0944) - Effector delivery system (VFC0001)]

VFG038727(gb|WP\_011705295) (cheW) chemotaxis protein CheW [Polar flagella (VF0473) - Motility (VFC0204)]

VFG041237(gb|WP\_010945887) (cegC2) Dot/Icm type IV secretion system effector CegC2 [Dot/Icm T4SS secretion system (VF0001) - Adherence (VFC0001)]

VFG034866(gb|WP\_000900547) (espX4) Type III secretion system effector EspX4 [TTSS secreted effectors (VF1111) - Effector delivery system (VFC0001)]

VFG002281(gb|WP\_003468301) (nagL) hyaluronidase [Mu-toxin (VF0389) - Exoenzyme (VFC0251)] [Clostridium (VF0001) - Adherence (VFC0001)]

VFG038691(gb|WP\_010634619) (flhG) CobQ/CobB/MinD/ParA family protein [Polar flagella (VF0473) - Motility (VFC0204)]

VFG000912(gb|WP\_001443207) (focD) F1C fimbrial usher [F1C fimbriae (VF0224) - Adherence (VFC0001)] [Pseudomonas (VF0001) - Adherence (VFC0001)]

VFG038715(gb|WP\_024943899) (motA) chemotaxis protein MotA [Polar flagella (VF0473) - Motility (VFC0204)]

VFG038824(gb|WP\_011706648) (flgM) anti-sigma-D factor [Polar flagella (VF0473) - Motility (VFC0204)] [Aeromonas (VF0001) - Adherence (VFC0001)]

VFG000935(gb|WP\_001222189) (iroN) salmochelin receptor IroN [Salmochelin siderophore (VF0230) - Nutrition (VFC0001) - Adherence (VFC0001)]

VFG043321(gb|WP\_010946642) (flgM) negative regulator of flagellin synthesis [Flagella (VF0157) - Motility (VFC0204)]

VFG034908(gb|WP\_000978349) (espY3) Type III secretion system effector EspY3 [TTSS secreted effectors (VF1111) - Effector delivery system (VFC0001)]

VFG010463(gb|WP\_010946666) (pilQ) type IV pilus secretin protein PilQ [Type IV pili (VF0155) - Adherence (VFC0001)]

VFG014681(gb|NP\_253640) (motB) flagellar motor protein [Flagella (VF0273) - Motility (VFC0204)] [Pseudomonas (VF0001) - Adherence (VFC0001)]

VFG002113(gb|WP\_015444908) (sidE/laiD) Dot/Icm type IV secretion system effector SidE [Dot/Icm T4SS secretion system (VF0001) - Adherence (VFC0001)]

VFG006582(gb|WP\_001862801) (flhF) flagellar biosynthesis protein [Flagella (VF0051) - Motility (VFC0204)]

VFG001931(gb|YP\_002344858) (cadF) outer membrane fibronectin-binding protein [CadF (VF0322) - Adherence (VFC0001)]

VFG013066 (shuW) heme anaerobic degradation radical SAM methyltransferase ChuW/HutW [Shu (VF0256) - Nutrition (VFC0001) - Adherence (VFC0001)]

VFG002425(gb|WP\_004526211) (pilA) type IV fimbrial pilin protein [Type IV pili (VF0431) - Adherence (VFC0001)]

VFG000916(gb|WP\_001017192) (chuS) heme oxygenase ChuS [Chu (VF0227) - Nutritional/Metabolic factor (VFC0001)]

VFG048643(gb|WP\_014907727) (vipB/tssC) type VI secretion system contractile sheath large subunit VipB [T6SS (VF0579) - Effector delivery system (VFC0001)]

VFG012513(gb|WP\_001221122) (iroB) glucosyltransferase IroB [Salmochelin siderophore (VF0230) - Nutrition (VFC0001) - Adherence (VFC0001)]

VFG051149(gb|WP\_002966733.1) (bspA) type IV secretion system effector, DUF2062 domain-containing protein [Type IV pili (VF0431) - Adherence (VFC0001)]

VFG002057(gb|NP\_248761) (tagR) type IV secretion associated protein TagR, positively regulates PpkA [HSI-I (VF0944) - Effector delivery system (VFC0001)]

VFG038867(gb|WP\_005314284) (fliI) lateral flagellar FliI-like assembly ATPase [Lateral flagella (VF0474) - Motility (VFC0204)]

VFG002463(gb|WP\_011205639) (bsaO) Type III secretion system protein BsaO [Bsa T3SS (VF0428) - Effector delivery system (VFC0001)]

VFG049161(gb|WP\_001029878) (clbO) colibactin polyketide synthase ClbO [Colibactin (VF0573) - Exotoxin (VFC0001) - Adherence (VFC0001)]

VFG012160(gb|WP\_011590331) (nanI) exo-alpha-sialidase [Sialidase (VF0391) - Exoenzyme (VFC0251)] [Clostridium (VF0001) - Adherence (VFC0001)]

VFG038289(gb|WP\_016349339) (exeH) general secretion pathway protein H [Exe T2SS (VF0478) - Effector delivery system (VFC0001)]

VFG000127(gb|NP\_252235) (algG) outer membrane protein AlgE [Alginate (VF0091) - Biofilm (VFC0271)] [Pseudomonas (VF0001) - Adherence (VFC0001)]

VFG034756 (espL1) Type III secretion system effector espL1 [TTSS secreted effectors (VF1111) - Effector delivery system (VFC0001)]

VFG002050(gb|WP\_001087302) (gspG) general secretion pathway protein G [T2SS (VF0333) - Effector delivery system (VFC0001)]

VFG001957(gb|YP\_002344812) (Cj1429c) hypothetical protein [Capsule (VF0323) - Immune modulation (VFC0001)]

VFG050787(gb|WP\_001112089.1) (gspF) general secretion pathway protein F [T2SS (VF1335) - Effector delivery system (VFC0001)]

VFG038760(gb|WP\_016351312) (flrB) two-component sensor kinase [Polar flagella (VF0473) - Motility (VFC0204)]

VFG049152(gb|WP\_000337350) (clbF) colibactin biosynthesis dehydrogenase ClbF [Colibactin (VF0573) - Exotoxin (VFC0001) - Adherence (VFC0001)]

VFG049914(gb|WP\_000037389) (tssB) Type VI secretion system protein TssB [T6SS (VF0579) - Effector delivery system (VFC0001)]

VFG041043(gb|NP\_251061) (PA2371) ClpA/B-type protease [HSI-3 (VF0944) - Effector delivery system (VFC0001)]

VFG044323(gb|WP\_015874960) (ybtS) yersiniabactin biosynthesis salicylate synthase YbtS [Ybt (VF0564) - Nutrition (VFC0001) - Adherence (VFC0001)]

VFG000035(gb|WP\_010929613) (bplD) UDP-N-acetylglucosamine 2-epimerase [LPS (VF0033) - Immune modulation (VFC0001)]

VFG000266(gb|WP\_002222141) (hmbR) hemoglobin receptor [HmbR (VF0048) - Nutritional/Metabolic factor (VF0048)] [Hemoglobin (VF0048)]

VFG012609(gb|WP\_000993317) (chuW) Putative oxygen independent coproporphyrinogen III oxidase [Chu (VF012609)] [Coproporphyrinogen III (VF012609)]

VFG038281(gb|WP\_016349337) (exeF) general secretion pathway protein F [Exe T2SS (VF0478) - Effector delivery system (VFC0086)] [General secretion pathway protein F (VF0478)]

VFG043015(gb|NP\_250150) (PA1459) chemotaxis-specific methyltransferase [Flagella (VF0273) - Motility (VFC0204)] [Chemotaxis-specific methyltransferase (VF043015)]

VFG000905(gb|WP\_001546261) (hlyC) Hemolysin C [-Hemolysin (VF0225) - Exotoxin (VFC0235)] [Escherichia coli (VF000905)]

VFG001252(gb|NP\_249793) (fliG) flagellar motor switch protein G [Flagella (VF0273) - Motility (VFC0204)] [Flagellar motor switch protein G (VF001252)]

VFG049018(gb|WP\_002913007) (rcsB) transcriptional regulator RcsB [RcsAB (VF0571) - Regulation (VFC0300)] [Transcriptional regulator RcsB (VF049018)]

VFG038572(gb|WP\_016349165) (mshD) MSHA (mannose-sensitive hemagglutinin) pili minor prepilin protein MshD [Mannose-sensitive hemagglutinin (VF038572)]

VFG002098(gb|WP\_010948481) (lepA) Dot/Icm type IV secretion system effector LepA, interaptin [Dot/Icm T4SS (VF002098)] [LepA (VF002098)]

VFG038356 (aopX) hypothetical protein [T3SS (VF0479) - Effector delivery system (VFC0086)] [Aeromonas salmonicida (VF038356)]

VFG044198(gb|WP\_003022885) (fslB) MFS transporter, inner membrane protein responsible for uptake of the folic acid [FslB (VF044198)] [MFS transporter (VF044198)]

VFG049062(gb|WP\_015875020) (rfbD) UDP-galactopyranose mutase [LPS (VF0561) - Immune modulation (VFC0258)] [UDP-galactopyranose mutase (VF049062)]

VFG000886(gb|WP\_000261297) (papJ) P pilus assembly protein PapJ [P fimbriae (VF0220) - Adherence (VFC0001)] [P pilus assembly protein PapJ (VF000886)]

VFG002275(gb|WP\_003467630) (pfoA) perfringolysin O [Theta-toxin/PFO (VF0382) - Exotoxin (VFC0235)] [Clostridium perfringens (VF002275)]

VFG049916(gb|WP\_000103365) (vgrG/tssI) type VI secretion system effector VgrG [T6SS (VF0579) - Effector delivery system (VFC0086)] [Type VI secretion system effector VgrG (VF049916)]

VFG000211(gb|NP\_250407) (pscC) type III secretion system secretin PscC [TTSS (VF0083) - Effector delivery system (VFC0086)] [Type III secretion system secretin PscC (VF000211)]

VFG042972(gb|WP\_000924780) (sipA) signal peptidase I [PI-2 (VF0530) - Adherence (VFC0001)] [Streptococcus pneumoniae (VF042972)]

VFG014893(gb|NP\_254009) (algC) phosphomannomutase AlgC [Alginate (VF0091) - Biofilm (VFC0271)] [Pseudomonas aeruginosa (VF014893)]

VFG001260(gb|NP\_250138) (fliQ) flagellar biosynthetic protein FliQ [Flagella (VF0273) - Motility (VFC0204)] [Flagellar biosynthetic protein FliQ (VF001260)]

VFG007286(gb|WP\_000290380) (flaC) flagellin [Flagella (VF0519) - Motility (VFC0204)] [Vibrio cholerae O1 (VF007286)]

VFG000908(gb|WP\_000860472) (hlyD) Hemolysin D [-Hemolysin (VF0225) - Exotoxin (VFC0235)] [Escherichia coli (VF000908)]

VFG041045(gb|NP\_251063) (PA2373) hypothetical protein [HSI-3 (VF0944) - Effector delivery system (VFC0086)] [Pseudomonas aeruginosa (VF041045)]

VFG002115(gb|WP\_015444209) (sdeB/laiB) Dot/Icm type IV secretion system effector SdeB [Dot/Icm T4SS (VF002115)] [SdeB (VF002115)]

VFG049164(gb|WP\_004175305) (clbS) colibactin self-protection protein ClbS [Colibactin (VF0573) - Exotoxin (VFC0235)] [Colibactin self-protection protein ClbS (VF049164)]

VFG049133(gb|WP\_004177236) (acrA) acriflavine resistance protein A [AcrAB (VF0568) - Antimicrobial activity (VFC0258)] [Acriflavine resistance protein A (VF049133)]

VFG038328(gb|WP\_005320795) (ascD) Type III secretion system OM ring protein AscD [T3SS (VF0479) - Effector delivery system (VFC0086)] [Type III secretion system OM ring protein AscD (VF038328)]

VFG049908(gb|WP\_001080148) (tssJ) Type VI secretion system protein TssJ [T6SS (VF0579) - Effector delivery system (VFC0086)] [Type VI secretion system protein TssJ (VF049908)]

VFG049835(gb|WP\_012076956) (exlA) hemolysin [Exolysin (VF0582) - Effector delivery system (VFC0086)] [Hemolysin (VF049835)]

VFG002280(gb|WP\_011010361) (nagK) hyaluronidase [Mu-toxin (VF0389) - Exoenzyme (VFC0251)] [Clostridium perfringens (VF002280)]

VFG045321(gb|WP\_010946511) (LPG\_RS03835) hypothetical protein [LPS (VF0171) - Immune modulation (VFC0258)] [LPS (VF0171)]

VFG049157(gb|WP\_014907259) (clbK) colibactin hybrid non-ribosomal peptide synthetase/type I polyketide synthase [Colibactin (VF0573) - Exotoxin (VFC0235)] [Colibactin hybrid non-ribosomal peptide synthetase/type I polyketide synthase (VF049157)]

VFG019180(gb|WP\_011987710) (bont) botulinum neurotoxin, BoNT [BoNT (VF0375) - Exotoxin (VFC0235)] [Botulinum neurotoxin, BoNT (VF019180)]

VFG049154(gb|WP\_014907257) (clbH) colibactin non-ribosomal peptide synthetase ClbH [Colibactin (VF0573) - Exotoxin (VFC0235)] [Colibactin non-ribosomal peptide synthetase ClbH (VF049154)]

VFG038643(gb|WP\_011705276) (fliJ) flagellar export protein FliJ [Polar flagella (VF0473) - Motility (VFC0204)] [Flagellar export protein FliJ (VF038643)]

VFG000913(gb|WP\_000237770) (focF) F1C minor fimbrial subunit F precursor [F1C fimbriae (VF0224) - Adherence (VFC0001)] [F1C minor fimbrial subunit F precursor (VF000913)]

VFG000690(gb|AAP42183) (AAP42183) Bcs3' [Capsule (VF0043) - Immune modulation (VFC0258)] [Haemophilus influenzae (VF000690)]

VFG043382(gb|WP\_000996418) (HP\_RS03480) RNA polymerase factor sigma-54 [Flagella (VF0051) - Motility (VFC0204)] [RNA polymerase factor sigma-54 (VF043382)]

VFG002177(gb|AAM75253) (cylA) cytolysin activator [Cytolysin (VF0356) - Exotoxin (VFC0235)] [Enterococcus faecalis (VF002177)]

VFG000888(gb|WP\_000723799) (papE) P pilus minor subunit PapE [P fimbriae (VF0220) - Adherence (VFC0001)] [P pilus minor subunit PapE (VF000888)]

VFG038619(gb|WP\_016349413) (motX) sodium-type flagellar motor component [Polar flagella (VF0473) - Motility (VFC0204)] [Sodium-type flagellar motor component (VF038619)]

VFG038371(gb|WP\_011705707) (vgrG2) VgrG protein [T6SS (VF0480) - Effector delivery system (VFC0086)] [VgrG protein (VF038371)]

VFG037852(gb|WP\_001075965) (ACICU\_RS00395) polysaccharide biosynthesis tyrosine autokinase [Capsule (VF0043) - Immune modulation (VFC0258)] [Polysaccharide biosynthesis tyrosine autokinase (VF037852)]

VFG049116(gb|WP\_012737528) (allA) ureidoglycolate hydrolase [Allantion utilization (VF0572) - Nutritional/Metabolic factor (VF0572)] [Ureidoglycolate hydrolase (VF049116)]

VFG000143(gb|NP\_253699) (waaF) heptosyltransferase I [LPS (VF0085) - Immune modulation (VFC0258)] [Pseudomonas aeruginosa (VF000143)]

VFG001935(gb|YP\_002344312) (ciaB) invasion antigen CiaB [CiaB (VF0324) - Invasion (VFC0083)] [Campylobacter jejuni (VF001935)]

VFG043778(gb|CAA52275) (bont) botulinum neurotoxin, BoNT [BoNT (VF0375) - Exotoxin (VFC0235)] [Clostridium botulinum (VF043778)]

VFG000353(gb|WP\_002208792) (*psaC*) outer membrane usher protein PsaC [Myf/pH6 antigen (VF0134) - Adherence (VFC0001)]

VFG038711(gb|WP\_016350060) (*cheB-2*) chemotaxis-specific methyl-esterase [Polar flagella (VF0473) - Motility (VFC0001)]

VFG038444(gb|WP\_075384315) (*tapM*) type IV pilus assembly protein PilM [Tap type IV pili (VF0475) - Adherence (VFC0001)]

VFG038776(gb|WP\_016351320) (*flgJ*) flagellar rod assembly protein/muramidase FlgJ [Polar flagella (VF0473) - Motility (VFC0001)]

VFG038468(gb|WP\_016351972) (*tapU*) twitching ATPase [Tap type IV pili (VF0475) - Adherence (VFC0001)]

VFG048808(gb|WP\_004899416) (*rfbK1*) O9 family phosphomannomutase RfbK1 [Capsule (VF0560) - Immune modulation (VFC0258)]

VFG000133(gb|NP\_252241) (*algA*) phosphomannose isomerase / guanosine 5'-diphospho-D-mannose pyrophosphatase [Alginate (VF0091) - Biofilm (VFC0001)]

VFG038623(gb|WP\_011705271) (*fliE*) flagellar hook-basal body complex protein FliE [Polar flagella (VF0473) - Motility (VFC0001)]

VFG000116(gb|NP\_254170) (*algB*) two-component response regulator AlgB [Alginate (VF0091) - Biofilm (VFC0001)]

VFG001964(gb|YP\_002344819) (*Cj1436c*) aminotransferase [Capsule (VF0323) - Immune modulation (VFC0258)]

VFG043631(gb|WP\_011081073) (*VV1\_RS15595*) pilus assembly protein N-terminal domain-containing protein [Type IV pili (VF0082) - Adherence (VFC0001)]

VFG001226(gb|NP\_249100) (*pilH*) twitching motility protein PilH [Type IV pili (VF0082) - Adherence (VFC0001)]

VFG049029(gb|WP\_014907241) (*KP1\_RS17220*) glycosyltransferase [LPS (VF0561) - Immune modulation (VFC0258)]

VFG016041(gb|NP\_251092) (*pvdI*) peptide synthase [Pyoverdine (VF0094) - Nutritional/Metabolic factor (VFC0001)]

VFG038886(gb|WP\_005314222) (*lafE*) LafE, flagellar hook control length protein [Lateral flagella (VF0474) - Motility (VFC0001)]

VFG041033(gb|NP\_251051) (*PA2361*) hypothetical protein [HSI-3 (VF0944) - Effector delivery system (VFC0001)]

VFG050514(gb|WP\_001214067.1) (*fimU*) GspH/FimT family pseudopilin [TFP (VF1334) - Adherence (VFC0001)]

VFG000186(gb|NP\_250382) (*pscT*) type III secretion system protein PscT [TTSS (VF0083) - Effector delivery system (VFC0001)]

VFG000934(gb|WP\_000348393) (*entA*) 2,3-dihydro-2,3-dihydroxybenzoate dehydrogenase EntA [Enterobactin (VF0562) - Nutritional/Metabolic factor (VFC0001)]

VFG041105(gb|NP\_459279) (*STM0281*) type VI secretion system-associated protein [SCI (Salmonella centrison) (VF0579) - Effector delivery system (VFC0001)]

VFG012191(gb|WP\_011948511) (*bont*) botulinum neurotoxin, BoNT [BoNT (VF0375) - Exotoxin (VFC0235)] [Enterobactin (VF0562) - Nutritional/Metabolic factor (VFC0001)]

VFG037762(gb|WP\_000078878) (*lpxL*) lauroyl acyltransferase [LPS (VF0466) - Immune modulation (VFC0258)]

VFG038480(gb|WP\_016349429) (*tppB*) type IV pilus pseudopilin [Tap type IV pili (VF0475) - Adherence (VFC0001)]

VFG002415(gb|WP\_001131063) (*yagX/ecpC*) E. coli common pilus usher EcpC [ECP (VF0404) - Adherence (VFC0001)]

VFG046465(gb|WP\_003028672) (*tufA*) elongation factor Tu [EF-Tu (VF0460) - Adherence (VFC0001)] [Francisella (VF0579) - Effector delivery system (VFC0001)]

VFG002419(gb|WP\_000744066) (*coa*) staphylocoagulase precursor [Staphylocoagulase (VF0421) - Exoenzyme (VFC0251)]

VFG041333(gb|WP\_010948115) (*lem24*) Dot/Icm type IV secretion system effector Lem24 [Dot/Icm T4SS secretion system (VF0579) - Effector delivery system (VFC0001)]

VFG001396(gb|NP\_216424) (*katG*) catalase-peroxidase [KatG (VF0303) - Stress survival (VFC0282)] [Mycobacterium (VF0579) - Effector delivery system (VFC0001)]

VFG000360(gb|WP\_002212799) (*ybtT*) type II thioesterase YbtT [Yersiniabactin (VF0136) - Nutritional/Metabolic factor (VFC0001)]

VFG049153(gb|WP\_000159201) (*clbG*) colibactin biosynthesis acyltransferase ClbG [Colibactin (VF0573) - Exotoxin (VFC0235)]

VFG037912(gb|WP\_000939040) (*pseB*) UDP-N-acetylglucosamine 4,6-dehydratase (inverting) [Capsule (VF0466) - Immune modulation (VFC0258)]

VFG049917(gb|WP\_000508696) (*rhs/PAAR*) Type VI secretion system protein, PAAR family [T6SS (VF0579) - Effector delivery system (VFC0001)]

VFG050772(gb|WP\_001020922.1) (*gspE2*) putative secretion pathway ATPase [T2SS (VF1335) - Effector delivery system (VFC0001)]

VFG049899(gb|WP\_001087735) (*tssA*) Type VI secretion system protein TssA [T6SS (VF0579) - Effector delivery system (VFC0001)]

VFG048459(gb|WP\_004147525) (*entS*) enterobactin exporter EntS [Ent (VF0562) - Nutritional/Metabolic factor (VFC0001)]

VFG012162(gb|WP\_011590241) (*nanJ*) exo-alpha-sialidase [Sialidase (VF0391) - Exoenzyme (VFC0251)] [Clostridium (VF0579) - Effector delivery system (VFC0001)]

VFG038611(gb|WP\_016349153) (*mshI1*) MSHA (mannose-sensitive hemagglutinin) pili biogenesis protein MshI1 [Type IV pili (VF0475) - Adherence (VFC0001)]

VFG001300(gb|WP\_000940793) (*cap8D*) type 8 capsular polysaccharide synthesis protein Cap8D [Capsule (VF0560) - Immune modulation (VFC0258)]

VFG038313(gb|WP\_043118380) (*exeN*) general secretion pathway protein N [Exe T2SS (VF0478) - Effector delivery system (VFC0001)]

VFG044332(gb|WP\_015874967) (*ybtE*) yersiniabactin biosynthesis salicyl-AMP ligase YbtE [Ybt (VF0564) - Nutritional/Metabolic factor (VFC0001)]

VFG007162(gb|WP\_005377232) (*vscR*) type III secretion system C-ring protein VscR [T3SS1 (VF0408) - Effector delivery system (VFC0001)]

VFG012327(gb|WP\_011076307) (*sfaC*) S fimbrial switch regulatory protein SfaC [S fimbriae (VF0222) - Adherence (VFC0001)]

VFG045473(gb|AAM75250) (*cylS*) CylS; cytolysin subunit [Cytolysin (VF0356) - Exotoxin (VFC0235)] [Enterobactin (VF0562) - Nutritional/Metabolic factor (VFC0001)]

VFG002492(gb|WP\_004184995) (*fliN*) flagellar motor switch protein FliN [Flagella (VF0430) - Motility (VFC0001)]

VFG038840(gb|WP\_005300916) (*flmH*) short chain dehydrogenase/reductase family oxidoreductase [Polar flagella (VF0473) - Motility (VFC0001)]

VFG000875(gb|WP\_000066579) (*fimC*) Chaperone protein fimC precursor [Type 1 fimbriae (VF0221) - Adherence (VFC0001)]

VFG000130(gb|NP\_252238) (algI) alginate o-acetyltransferase AlgI [Alginate (VF0091) - Biofilm (VFC0271)] [

VFG038639(gb|WP\_011705275) (fliI) flagellum-specific ATP synthase [Polar flagella (VF0473) - Motility (VFC0001)] [

VFG047162(gb|WP\_003022298) (wbtE) nucleotide sugar dehydrogenase [LPS (VF0542) - Immune modulation (VFC0258)] [

VFG042736(gb|NP\_253152) (rpoN) RNA polymerase factor sigma-54 [Type IV pili (VF0082) - Adherence (VFC0001)] [

VFG047512(gb|WP\_003020978) (bioB) biotin synthase [Biotin synthesis (VF0552) - Nutritional/Metabolic factors (VFC0258)] [

VFG038285(gb|WP\_005308483) (exeG) general secretion pathway protein G [Exe T2SS (VF0478) - Effector delivery (VFC0001)] [

VFG049156(gb|WP\_077265119) (clbJ) colibactin non-ribosomal peptide synthetase ClbJ [Colibactin (VF0573) - Immune modulation (VFC0258)] [

VFG038417(gb|WP\_016349294) (fimD) fimbrial chaperone protein [Type I pili (VF0486) - Adherence (VFC0001)] [

VFG048449(gb|WP\_012737621) (fepB) iron-enterobactin transporter periplasmic binding protein [Ent (VF0562) - Immune modulation (VFC0258)] [

VFG000025(gb|WP\_010929995) (cyaA) bifunctional hemolysin-adenylate cyclase precursor [Cya (VF0028) - Exoenzyme (VFC0251)] [

VFG049912 (tssC) Type VI secretion system protein TssC [T6SS (VF0579) - Effector delivery system (VFC0082)] [

VFG000182(gb|NP\_251793) (xcpR) general secretion pathway protein E [Xcp secretion system (VF0084) - Effector delivery (VFC0001)] [

VFG002499(gb|WP\_004197164) (fliI) flagellum-specific ATP synthase FliI [Flagella (VF0430) - Motility (VFC0001)] [

VFG038719(gb|WP\_016350061) (pomB) ompA family protein [Polar flagella (VF0473) - Motility (VFC0204)] [

VFG000173(gb|NP\_252907) (phzS) flavin dependent hydroxylase PhzS [Pyocyanin (VF0100) - Nutritional/Metabolic factors (VFC0258)] [

VFG002191(gb|WP\_002369252) (sprE) serine proteinase, V8 family [SprE (VF0358) - Exoenzyme (VFC0251)] [

VFG048229(gb|WP\_015875142) (fimB) tyrosine recombinase [Type I fimbriae (VF0566) - Adherence (VFC0001)] [

VFG002517(gb|WP\_004203463) (flgK) flagellar hook-associated protein 1 FlgK [Flagella (VF0430) - Motility (VFC0001)] [

VFG038472(gb|WP\_011706550) (tapW) twitching ATPase [Tap type IV pili (VF0475) - Adherence (VFC0001)] [

VFG002432(gb|WP\_004537540) (pilQ) type IV pilus biosynthesis protein [Type IV pili (VF0431) - Adherence (VFC0001)] [

VFG045478(gb|WP\_016356699) (LPG\_RS00200) hypothetical protein [Dot/Icm T4SS secreted effectors (VF0792) - Immune modulation (VFC0258)] [

VFG000362(gb|WP\_002212777) (irp1) yersiniabactin biosynthetic protein Irp1 [Yersiniabactin (VF0136) - Nutritional/Metabolic factors (VFC0258)] [

VFG042976(gb|WP\_154081516) (ebpA) endocarditis and biofilm-associated pilus tip protein EbpA [Ebp pili (VF0431) - Adherence (VFC0001)] [

VFG002518(gb|WP\_004200262) (flgL) flagellar hook-associated protein 3 FlgL [Flagella (VF0430) - Motility (VFC0001)] [

VFG038460(gb|WP\_043119325) (tapQ) type IV pilus secretin PilQ [Tap type IV pili (VF0475) - Adherence (VFC0001)] [

VFG034915(gb|WP\_000225947) (espY4) Type III secretion system effector EspY4 [TTSS secreted effectors (VF0001) - Immune modulation (VFC0258)] [

VFG006622(gb|WP\_000796857) (flhB) flagellar biosynthesis protein [Flagella (VF0051) - Motility (VFC0204)] [

VFG000968(gb|WP\_010922714) (emm) M protein [M protein (VF0242) - Immune modulation (VFC0258)] [Streptococcus (VFC0258)] [

VFG038892(gb|WP\_043118302) (aerA/act) Aerolysin A [Aerolysin (VF0481) - Exotoxin (VFC0235)] [Aeromonas (VFC0235)] [

VFG000884(gb|WP\_000654937) (papC) usher protein PapC [P fimbriae (VF0220) - Adherence (VFC0001)] [Escherichia coli (VFC0001)] [

VFG000944(gb|AAK16477) (draC) usher protein DraC [Dr adhesins (VF0223) - Adherence (VFC0001)] [Escherichia coli (VFC0001)] [

VFG001310(gb|WP\_001230668) (capN) capsular polysaccharide type 5/8 biosynthesis epimerase CapN [Capsule (VF0001) - Immune modulation (VFC0258)] [

VFG001403(gb|NP\_216899) (mbtB) Phenylloxazoline synthase MbtB (phenylloxazoline synthetase) [Mycobacterium tuberculosis (VF0001) - Immune modulation (VFC0258)] [

VFG002047(gb|WP\_000498818) (gspD) general secretion pathway protein D [T2SS (VF0333) - Effector delivery (VFC0001)] [

VFG037372(gb|WP\_001104139) (bauB) ferric siderophore ABC transporter, periplasmic siderophore-binding protein [Siderophore (VF0001) - Immune modulation (VFC0258)] [

VFG000047(gb|WP\_003820063) (bscO) Bordetella Bsc type III secretion system protein BscO [TTSS (VF0035) - Effector delivery (VFC0001)] [

VFG001391(gb|NP\_215677) (narG) nitrate reductase subunit alpha [Nitrate reductase (VF0302) - Nutritional/Metabolic factors (VFC0258)] [

VFG042865(gb|WP\_010946369) (fimT) type IV pilus biogenesis protein FimT [Type IV pili (VF0155) - Adherence (VFC0001)] [

VFG038861(gb|WP\_005314296) (lfhA) lateral flagellar biosynthesis protein [Lateral flagella (VF0474) - Motility (VFC0001)] [

VFG001827(gb|WP\_001020414) (senB) enterotoxin [ShET2 (VF0258) - Exotoxin (VFC0235)] [Shigella boydii (VFC0235)] [

VFG007823(gb|NP\_217447) (ppsA) phthiocerol synthesis polyketide synthase type I PpsA [PDIM (VF0309) - Immune modulation (VFC0258)] [

VFG049118(gb|WP\_012737529) (allR) DNA-binding transcriptional repressor AllR [Allantoin utilization (VF0500) - Immune modulation (VFC0258)] [

VFG006902(gb|WP\_000957200) (pilB) type IV-A pilus assembly ATPase PilB [ChiRP (VF0609) - Adherence (VFC0001)] [

VFG012333(gb|WP\_000703306) (sfaD) S fimbriae minor subunit SfaD [S fimbriae (VF0222) - Adherence (VFC0001)] [

VFG000180(gb|NP\_251791) (xcpT) general secretion pathway protein G [Xcp secretion system (VF0084) - Effector delivery (VFC0001)] [

VFG000282(gb|WP\_000488766) (cag3) type IV secretion system protein Cag3, component outer membrane subunit [Type IV secretion system (VF0001) - Immune modulation (VFC0258)] [

VFG000129(gb|NP\_252237) (algL) poly(beta-d-mannuronate) lyase precursor AlgL [Alginate (VF0091) - Biofilm  
VFG041100(gb|NP\_459274) (STM0276) Hcp1 family type VI secretion system effector [SCI (Salmonella centris  
VFG002410(gb|WP\_001010291) (esxC) type VII secretion system secreted protein EsxC [Type VII secretion sys  
VFG048498(gb|WP\_012737619) (entF) enterobactin synthase subunit F [Ent (VF0562) - Nutritional/Metabolic fa  
VFG000616(gb|NP\_709455) (iucB) aerobactin synthesis protein IucB [Aerobactin (VF0123) - Nutritional/Metabo  
VFG000469(gb|NP\_459778) (slrP) type III secretion system effector SlrP, E3 ubiquitin ligase [TTSS effectors se  
VFG038867(gb|WP\_005314284) (fliI) lateral flagellar FliI-like assembly ATPase [Lateral flagella (VF0474) - M  
VFG002503(gb|WP\_004534368) (fliE) flagellar hook-basal body complex protein FliE [Flagella (VF0430) - Mot  
VFG041113(gb|NP\_459287) (STM0289) type VI secretion protein Vgr [SCI (Salmonella centrisome island) (VF  
VFG038397(gb|WP\_011705722) (vasH) sigma-54 dependent transcriptional regulator [T6SS (VF0480) - Effector  
VFG002059(gb|NP\_248763) (tagT) type six secretion associated protein TagT, ATP-binding component of ABC  
VFG000114(gb|NP\_253218) (xcpA/pilD) type 4 prepilin peptidase PilD [Type IV pili (VF0082) - Adherence (VF  
VFG048980(gb|WP\_041937790) (KP1\_RS17345) capsule assembly Wzi family protein [Capsule (VF0560) - Im  
VFG000133(gb|NP\_252241) (algA) phosphomannose isomerase / guanosine 5'-diphospho-D-mannose pyrophosph  
VFG038581(gb|WP\_043118279) (mshB) MSHA (mannose-sensitive hemagglutinin) pili minor prepilin protein M  
VFG001918(gb|YP\_002344570) (fliR) flagellar biosynthetic protein FliR [Flagella (VF0114) - Motility (VFC020  
VFG038820(gb|WP\_161785096) (flgA) flagella basal body P-ring formation protein FlgA [Polar flagella (VF047  
VFG045495(gb|WP\_010946171) (legY) Dot/Icm type IV secretion system effector LegY [Dot/Icm T4SS secrete  
VFG038800(gb|WP\_016351322) (flgD) flagellar hook capping protein [Polar flagella (VF0473) - Motility (VFC0  
VFG042075(gb|WP\_003814626) (bteA) chaperone for BteA [TTSS (VF0035) - Effector delivery system (VFC00  
VFG043016(gb|NP\_250155) (PA1464) purine-binding chemotaxis protein [Flagella (VF0273) - Motility (VFC02  
VFG038856(gb|WP\_005314315) (lfiN) lateral flagellar motor switch protein, lfiN [Lateral flagella (VF0474) - M  
VFG000363(gb|WP\_002212775) (irp2) yersiniabactin biosynthetic protein Irp2 [Yersiniabactin (VF0136) - Nutri  
VFG038321(gb|WP\_005320811) (ascK) Type III secretion system C ring protein AscK [T3SS (VF0479) - Effect  
VFG050699(gb|WP\_000840548.1) (pilR) sigma-54 dependent transcriptional regulator [TFP (VF1334) - Adheren  
VFG002056 (gspM) general secretion pathway protein M [T2SS (VF0333) - Effector delivery system (VFC0086  
VFG043014(gb|NP\_250149) (PA1458) two-component sensor [Flagella (VF0273) - Motility (VFC0204)] [Pseud  
VFG002126(gb|NP\_219593) (cdsV) Type III secretion protein CdsV [TTSS (VF0344) - Effector delivery system  
VFG001210(gb|NP\_253244) (pilY1) type 4 fimbrial biogenesis protein PilY1 [Type IV pili (VF0082) - Adheren  
VFG051098(gb|WP\_002001416.1) (clpV/tssH) type VI secretion system ATPase TssH [T6SS (VF1337) - Effect  
VFG038389(gb|WP\_011705718) (atsK) Type VI secretion system protein [T6SS (VF0480) - Effector delivery sy  
VFG050159(gb|WP\_001331697) (kpsD) Polysialic acid transport protein precursor [K1 capsule (VF0239) - Invas  
VFG038269(gb|WP\_075384415) (exeC) general secretion pathway protein C [Exe T2SS (VF0478) - Effector del  
VFG049159(gb|WP\_014907260) (clbM) precolibactin export MATE transporter ClbM [Colibactin (VF0573) - E  
VFG038593(gb|WP\_016349158) (mshN) Tetratricopeptide repeat protein, PilF-like [MSHA type IV pili (VF047  
VFG001845(gb|WP\_010946207) (icmF) Dot/Icm type IV secretion system protein IcmF [Dot/Icm (VF0156) - Ef  
VFG051070(gb|WP\_001066523.1) (tssC) type VI secretion system contractile sheath large subunit [T6SS (VF13  
VFG000169(gb|NP\_252919) (pchC) pyochelin biosynthetic protein PchC [Pyochelin (VF0095) - Nutritional/Met  
VFG002521(gb|WP\_004525693) (flhF) flagellar biosynthesis regulator FlhF [Flagella (VF0430) - Motility (VFC  
VFG002446(gb|WP\_011205636) (bapA) Type III secretion system secreted protein BapA [Bsa T3SS (VF0428) -  
VFG038525(gb|WP\_043118801) (flpH) Flp pilus assembly protein FlpH [Flp type IV pili (VF0476) - Adherence  
VFG001296(gb|WP\_000676533) (sspA) serine protease; V8 protease; glutamyl endopeptidase [V8 protease (VFC  
VFG043500(gb|WP\_011206108) (mhp271) p97 cilium adhesin paralog [P97/P102 paralog family (VF0426) - Ad  
VFG002025(gb|YP\_002344527) (htrB) lipid A biosynthesis lauroyl acyltransferase [LOS (VF0326) - Immune me  
VFG002329(gb|WP\_005160381) (fliG) flagellar motor switch protein G [Flagella (VF0394) - Motility (VFC0204  
VFG013069(gb|WP\_005019013) (shuU) permease of iron compound ABC transport system [Shu (VF0256) - Nu

VFG050787(gb|WP\_001112089.1) (gspF) general secretion pathway protein F [T2SS (VF1335) - Effector delivery system (VFC0086)] [Escherichia coli O157:H7 (VF0172)]

VFG001713(gb|WP\_001298062) (papX) PapX protein regulates flagellum synthesis to repress motility [P fimbriae (VF0479) - Adherence (VFC0001)] [Escherichia coli O157:H7 (VF0172)]

VFG034908(gb|WP\_000978349) (espY3) Type III secretion system effector EspY3 [TTSS secreted effectors (VF0172) - Adherence (VFC0001)] [Escherichia coli O157:H7 (VF0172)]

VFG037792(gb|WP\_000064875) (lpxA) acyl-ACP--UDP-N-acetylglucosamine O-acyltransferase [LPS (VF0466) - Immune modulation (VFC0258)] [Escherichia coli O157:H7 (VF0172)]

VFG001231(gb|NP\_249104) (chpA) still frameshift probable component of chemotactic signal transduction system [Motility (VFC0204)] [Pseudomonas aeruginosa (VF0001)]

VFG038788(gb|WP\_011706639) (flgG) flagellar basal body rod protein FlgG [Polar flagella (VF0473) - Motility (VFC0204)] [Escherichia coli O157:H7 (VF0172)]

VFG002365(gb|WP\_005167740) (gmd) GDP-mannose 4,6-dehydratase [O-antigen (VF0392) - Immune modulation (VFC0258)] [Escherichia coli O157:H7 (VF0172)]

VFG047162(gb|WP\_003022298) (wbtE) nucleotide sugar dehydrogenase [LPS (VF0542) - Immune modulation (VFC0258)] [Escherichia coli O157:H7 (VF0172)]

VFG006342(gb|WP\_000753173) (babB/hopT) outer membrane protein adhesin [BabA (VF0053) - Adherence (VFC0001)] [Escherichia coli O157:H7 (VF0172)]

VFG038365(gb|WP\_011705044) (hcp1) HcpA-like protein [T6SS (VF0480) - Effector delivery system (VFC0086)] [Aeromonas salmonicida (VF0001)]

VFG001251(gb|NP\_249792) (fliF) flagellar M-ring protein FliF [Flagella (VF0273) - Motility (VFC0204)] [Pseudomonas aeruginosa (VF0001)]

VFG038513(gb|WP\_016350157) (flpK) Flp pilus pseudopilin [Flp type IV pili (VF0476) - Adherence (VFC0001)] [Escherichia coli O157:H7 (VF0172)]

VFG001826(gb|NP\_217099) (relA) Probable GTP pyrophosphokinase RelA (ATP:GTP 3'-pyrophosphotransferase) [RelA (VF0001) - Stress survival (VFC0282)] [Neisseria meningitidis (VF0001)]

VFG038619(gb|WP\_016349413) (motX) sodium-type flagellar motor component [Polar flagella (VF0473) - Motility (VFC0204)] [Escherichia coli O157:H7 (VF0172)]

VFG049029(gb|WP\_014907241) (KP1\_RS17220) glycosyltransferase [LPS (VF0561) - Immune modulation (VFC0258)] [Klebsiella pneumoniae (VF0001)]

VFG000908(gb|WP\_000860472) (hlyD) Hemolysin D [-Hemolysin (VF0225) - Exotoxin (VFC0235)] [Escherichia coli O157:H7 (VF0172)]

VFG002067(gb|NP\_248771) (fha1) type VI secretion system forkhead-associated protein Fha1 [HSI-I (VF0334) - Effector delivery system (VFC0086)] [Escherichia coli O157:H7 (VF0172)]

VFG000262(gb|WP\_010980797) (tbpA) transferrin-binding protein A [Tbp (VF0046) - Nutritional/Metabolic factor (VFC0272)] [Escherichia coli O157:H7 (VF0172)]

VFG000937(gb|WP\_000750139) (iucD) L-lysine 6-monooxygenase IucD [Aerobactin (VF0229) - Nutritional/Metabolic factor (VFC0272)] [Escherichia coli O157:H7 (VF0172)]

VFG038373(gb|WP\_011705708) (atsA) Type VI secretion system protein [T6SS (VF0480) - Effector delivery system (VFC0086)] [Aeromonas salmonicida (VF0001)]

VFG038576(gb|WP\_016349164) (mshC) MSHA (mannose-sensitive hemagglutinin) pili minor prepilin protein MshC [Pili (VF0476) - Adherence (VFC0001)] [Escherichia coli O157:H7 (VF0172)]

VFG014117(gb|NP\_251831) (wbpM) nucleotide sugar epimerase/dehydratase WbpM [LPS (VF0085) - Immune modulation (VFC0258)] [Escherichia coli O157:H7 (VF0172)]

VFG035902(gb|WP\_000209220) (aatP) permease AatP [Dispersin (VF0215) - Others (VFC0346)] [Escherichia coli O157:H7 (VF0172)]

VFG012621(gb|WP\_000189352) (chuY) ChuY [Chu (VF0234) - Nutritional/Metabolic factor (VFC0272)] [Escherichia coli O157:H7 (VF0172)]

VFG002220(gb|WP\_004686741) (pgm) phosphoglucomutase [LPS (VF0367) - Immune modulation (VFC0258)] [Escherichia coli O157:H7 (VF0172)]

VFG050567(gb|WP\_000768964.1) (pilY1) VWA domain-containing protein [TFP (VF1334) - Adherence (VFC0001)] [Escherichia coli O157:H7 (VF0172)]

VFG001447(gb|CAA50007) (cnf1) cytotoxic necrotizing factor 1 [CNF-1 (VF0240) - Exotoxin (VFC0235)] [Escherichia coli O157:H7 (VF0172)]

VFG002076(gb|NP\_248780) (clpV1) type VI secretion system AAA+ family ATPase [HSI-I (VF0334) - Effector delivery system (VFC0086)] [Escherichia coli O157:H7 (VF0172)]

VFG012501(gb|WP\_000271272) (iroE) esterase [Salmochelin siderophore (VF0230) - Nutritional/Metabolic factor (VFC0272)] [Escherichia coli O157:H7 (VF0172)]

VFG000615(gb|NP\_709454) (iucA) aerobactin synthesis protein IucA [Aerobactin (VF0123) - Nutritional/Metabolic factor (VFC0272)] [Escherichia coli O157:H7 (VF0172)]

VFG038261(gb|WP\_016352107) (exeA) general secretion pathway protein A [Exe T2SS (VF0478) - Effector delivery system (VFC0086)] [Aeromonas salmonicida (VF0001)]

VFG038356 (aopX) hypothetical protein [T3SS (VF0479) - Effector delivery system (VFC0086)] [Aeromonas salmonicida (VF0001)]

VFG044330(gb|WP\_032447695) (ybtU) yersiniabactin biosynthesis oxidoreductase YbtU [Ybt (VF0564) - Nutritional/Metabolic factor (VFC0272)] [Yersinia enterocolitica (VF0001)]

VFG038399(gb|WP\_011705723) (atsP) Type VI secretion system protein [T6SS (VF0480) - Effector delivery system (VFC0086)] [Aeromonas salmonicida (VF0001)]

VFG045520(gb|WP\_010947043) (legC1) Dot/Icm type IV secretion system effector LegC1 [Dot/Icm T4SS secretion system (VF0475) - Adherence (VFC0001)] [Legionella pneumophila (VF0001)]

VFG041032(gb|NP\_251050) (PA2360) hypothetical protein [HSI-3 (VF0944) - Effector delivery system (VFC0086)] [Pseudomonas aeruginosa (VF0001)]

VFG038313(gb|WP\_043118380) (exeN) general secretion pathway protein N [Exe T2SS (VF0478) - Effector delivery system (VFC0086)] [Aeromonas salmonicida (VF0001)]

VFG000923(gb|WP\_001034892) (fepA) ferrienterobactin outer membrane transporter [Enterobactin (VF0228) - Nutritional/Metabolic factor (VFC0272)] [Escherichia coli O157:H7 (VF0172)]

VFG014629(gb|NP\_250146) (fliA) flagellar biosynthesis sigma factor FliA [Flagella (VF0273) - Motility (VFC0204)] [Escherichia coli O157:H7 (VF0172)]

VFG037497(gb|WP\_085947929) (ACICU\_RS04580) TonB-dependent receptor [HemO cluster (VF0636) - Nutritional/Metabolic factor (VFC0272)] [Acetivibrio caryophilus (VF0001)]

VFG000931(gb|WP\_001336900) (entC) isochorismate synthase 1 [Enterobactin (VF0228) - Nutritional/Metabolic factor (VFC0272)] [Escherichia coli O157:H7 (VF0172)]

VFG048762(gb|WP\_015874732) (impA/tssA) type VI secretion system protein TssA [T6SS (VF0569) - Effector delivery system (VFC0086)] [Aeromonas salmonicida (VF0001)]

VFG014984(gb|NP\_253136) (algW) AlgW protein [Alginate (VF0091) - Biofilm (VFC0271)] [Pseudomonas aeruginosa (VF0001)]

VFG033475(gb|WP\_001273446) (sepL) Type III secretion system secretion gatekeeper SepL [TTSS (VF0172) - Adherence (VFC0001)] [Escherichia coli O157:H7 (VF0172)]

VFG042739(gb|NP\_254019) (crc) catabolite repression control protein [Type IV pili (VF0082) - Adherence (VFC0001)] [Escherichia coli O157:H7 (VF0172)]

VFG037028(gb|WP\_002218620) (katA) catalase [KatA (VF0454) - Stress survival (VFC0282)] [Neisseria meningitidis (VF0001)]

VFG014369(gb|NP\_249789) (fleS) two-component sensor [Flagella (VF0273) - Motility (VFC0204)] [Pseudomonas (VF000000) - Motility (VFC0204)]

VFG049915(gb|WP\_001142968) (hcp2/tssD2) Type VI secretion system protein, Hcp family [T6SS (VF0579) - Effector delivery system (VFC0086)] [Pseudomonas (VF000000) - Motility (VFC0204)]

VFG048449(gb|WP\_012737621) (fepB) iron-enterobactin transporter periplasmic binding protein [Ent (VF0562) - Nutritional/Metabolic factor (VFC0272)] [Enterobacter (VF000000) - Nutritional/Metabolic factor (VFC0272)]

VFG002529(gb|WP\_011205290) (tsr) methyl-accepting chemotaxis protein I [Flagella (VF0430) - Motility (VFC0204)] [Pseudomonas (VF000000) - Motility (VFC0204)]

VFG016041(gb|NP\_251092) (pvdI) peptide synthase [Pyoverdine (VF0094) - Nutritional/Metabolic factor (VFC0272)] [Pseudomonas (VF000000) - Nutritional/Metabolic factor (VFC0272)]

VFG041260(gb|WP\_010946680) (legL1) Dot/Icm type IV secretion system effector LegL1 [Dot/Icm T4SS secretion system (VF000000) - Effector delivery system (VFC0086)] [Pseudomonas (VF000000) - Motility (VFC0204)]

VFG002306(gb|NP\_461449) (ratB) putative outer membrane protein [RatB (VF0399) - Adherence (VFC0001)] [Pseudomonas (VF000000) - Adherence (VFC0001)]

VFG048632(gb|WP\_004176434) (vipA/tssB) type VI secretion system contractile sheath small subunit VipA [T6SS (VF0579) - Effector delivery system (VFC0086)] [Pseudomonas (VF000000) - Motility (VFC0204)]

VFG001248(gb|NP\_249788) (fleQ) transcriptional regulator FleQ [Flagella (VF0273) - Motility (VFC0204)] [Pseudomonas (VF000000) - Motility (VFC0204)]

VFG000919(gb|WP\_001095619) (chuW) Putative oxygen independent coproporphyrinogen III oxidase [Chu (VF0227) - Nutritional/Metabolic factor (VFC0272)] [Escherichia (VF000000) - Nutritional/Metabolic factor (VFC0272)]

VFG000181(gb|NP\_251792) (xcpS) general secretion pathway protein F [Xcp secretion system (VF0084) - Effector delivery system (VFC0086)] [Pseudomonas (VF000000) - Motility (VFC0204)]

VFG011510(gb|WP\_002964609) (lpsB/lpcC) Lipopolysaccharide core biosynthesis mannosyltransferase LpcC [Lipopolysaccharide biosynthesis (VF000000) - Nutritional/Metabolic factor (VFC0272)] [Pseudomonas (VF000000) - Nutritional/Metabolic factor (VFC0272)]

VFG038607(gb|WP\_016349154) (mshJ) MSHA (mannose-sensitive hemagglutinin) pili biogenesis protein MshJ [Pili biogenesis (VF000000) - Adherence (VFC0001)] [Pseudomonas (VF000000) - Adherence (VFC0001)]

VFG013594(gb|WP\_164927859) (hgpB) TonB-dependent hemoglobin/transferrin/lactoferrin family receptor [Hemoglobin (VF000000) - Adherence (VFC0001)] [Pseudomonas (VF000000) - Adherence (VFC0001)]

VFG048297(gb|WP\_014906961) (fimG) type 1 fimbrial minor component [Type I fimbriae (VF0566) - Adherence (VFC0001)] [Pseudomonas (VF000000) - Adherence (VFC0001)]

VFG000922(gb|WP\_000910402) (chuU) heme permease protein ChuU [Chu (VF0227) - Nutritional/Metabolic factor (VFC0272)] [Escherichia (VF000000) - Nutritional/Metabolic factor (VFC0272)]

VFG000364(gb|WP\_000140406) (ybtA) transcriptional regulator YbtA [Yersiniabactin (VF0136) - Nutritional/Metabolic factor (VFC0272)] [Yersinia (VF000000) - Nutritional/Metabolic factor (VFC0272)]

VFG048194(gb|WP\_003022155) (pdpD) Type VI secretion system secreted protein PdpD [T6SS (VF0544) - Effector delivery system (VFC0086)] [Pseudomonas (VF000000) - Motility (VFC0204)]

VFG048528(gb|WP\_004183335) (entD) enterochelin synthetase component D [Ent (VF0562) - Nutritional/Metabolic factor (VFC0272)] [Enterobacter (VF000000) - Nutritional/Metabolic factor (VFC0272)]

VFG012329(gb|WP\_000046976) (sfaB) S fimbrial switch regulatory protein SfaB [S fimbriae (VF0222) - Adherence (VFC0001)] [Pseudomonas (VF000000) - Adherence (VFC0001)]

VFG012609(gb|WP\_000993317) (chuW) Putative oxygen independent coproporphyrinogen III oxidase [Chu (VF0227) - Nutritional/Metabolic factor (VFC0272)] [Escherichia (VF000000) - Nutritional/Metabolic factor (VFC0272)]

VFG044322(gb|WP\_004190148) (iroE) siderophore esterase IroE [Sal (VF0563) - Nutritional/Metabolic factor (VFC0272)] [Salmonella (VF000000) - Nutritional/Metabolic factor (VFC0272)]

VFG000938(gb|WP\_001015709) (iucC) aerobactin siderophore biosynthesis protein IucC [Aerobactin (VF0229) - Nutritional/Metabolic factor (VFC0272)] [Aeromonas (VF000000) - Nutritional/Metabolic factor (VFC0272)]

VFG007857(gb|NP\_217450) (ppsD) phthiocerol synthesis polyketide synthase type I PpsD [PDIM (VF0309) - Infection (VFC0235)] [Pseudomonas (VF000000) - Infection (VFC0235)]

VFG038432(gb|WP\_016352168) (tapB) type IV pilus assembly ATPase, PilB-like [Tap type IV pili (VF0475) - Adherence (VFC0001)] [Pseudomonas (VF000000) - Adherence (VFC0001)]

VFG014893(gb|NP\_254009) (algC) phosphomannomutase AlgC [Alginate (VF0091) - Biofilm (VFC0271)] [Pseudomonas (VF000000) - Biofilm (VFC0271)]

VFG013948(gb|NP\_251650) (pilZ) type 4 fimbrial biogenesis protein PilZ [Type IV pili (VF0082) - Adherence (VFC0001)] [Pseudomonas (VF000000) - Adherence (VFC0001)]

VFG044194(gb|WP\_003028588) (FTT\_RS09560) hypothetical protein [Rhizoferrin (VF0551) - Nutritional/Metabolic factor (VFC0272)] [Rhizobium (VF000000) - Nutritional/Metabolic factor (VFC0272)]

VFG038892(gb|WP\_043118302) (aerA/act) Aerolysin A [Aerolysin (VF0481) - Exotoxin (VFC0235)] [Aeromonas (VF000000) - Exotoxin (VFC0235)]

VFG049908(gb|WP\_001080148) (tssJ) Type VI secretion system protein TssJ [T6SS (VF0579) - Effector delivery system (VFC0086)] [Pseudomonas (VF000000) - Motility (VFC0204)]

VFG000135(gb|NP\_249455) (mucB) anti-sigma factor MucA, inhibitor of alg gene expression [Alginate (VF0091) - Biofilm (VFC0271)] [Pseudomonas (VF000000) - Biofilm (VFC0271)]

VFG002381(gb|NP\_218386) (eccB1) ESX-1 type VII secretion system protein EccB1 [ESX-1 (VF0315) - Effector delivery system (VFC0086)] [Mycobacterium (VF000000) - Effector delivery system (VFC0086)]

VFG038659(gb|WP\_011705280) (fliN) flagellar motor switch protein FliN [Polar flagella (VF0473) - Motility (VFC0204)] [Pseudomonas (VF000000) - Motility (VFC0204)]

VFG049120(gb|WP\_012737535) (allB) allantoinase [Allantoin utilization (VF0572) - Nutritional/Metabolic factor (VFC0272)] [Pseudomonas (VF000000) - Nutritional/Metabolic factor (VFC0272)]

VFG045598(gb|WP\_010948515) (LPG\_RS14265) Dot/Icm type IV secretion system effector [Dot/Icm T4SS secretion system (VF000000) - Effector delivery system (VFC0086)] [Pseudomonas (VF000000) - Motility (VFC0204)]

VFG000907(gb|WP\_000376545) (hlyB) Hemolysin B [-Hemolysin (VF0225) - Exotoxin (VFC0235)] [Escherichia (VF000000) - Exotoxin (VFC0235)]

VFG038407(gb|WP\_011705728) (vgrG3) VgrG protein [T6SS (VF0480) - Effector delivery system (VFC0086)] [Pseudomonas (VF000000) - Motility (VFC0204)]

VFG038380(gb|WP\_043163044) (vipB) Type VI secretion system contractile sheath large subunit TssC/VipB [T6SS (VF0579) - Effector delivery system (VFC0086)] [Pseudomonas (VF000000) - Motility (VFC0204)]

VFG034895(gb|WP\_001304001) (espY1) Type III secretion system effector EspY1 [TTSS secreted effectors (VF000000) - Effector delivery system (VFC0086)] [Pseudomonas (VF000000) - Motility (VFC0204)]

VFG041338(gb|WP\_010948206) (ceg32/sidI) Dot/Icm type IV secretion system effector Ceg32/SidI [Dot/Icm T4SS secretion system (VF000000) - Effector delivery system (VFC0086)] [Pseudomonas (VF000000) - Motility (VFC0204)]

VFG043774(gb|AAB24244) (bont) botulinum neurotoxin, BoNT [BoNT (VF0375) - Exotoxin (VFC0235)] [Clostridium (VF000000) - Exotoxin (VFC0235)]

VFG000921(gb|WP\_000189356) (chuY) ChuY [Chu (VF0227) - Nutritional/Metabolic factor (VFC0272)] [Escherichia (VF000000) - Nutritional/Metabolic factor (VFC0272)]

VFG034754(gb|WP\_000081129) (espL1) Type III secretion system effector espL1 [TTSS secreted effectors (VF000000) - Effector delivery system (VFC0086)] [Pseudomonas (VF000000) - Motility (VFC0204)]

VFG016346(gb|WP\_001035927) (BAS\_RS06430) immune inhibitor A [InhA (VF0536) - Exoenzyme (VFC0251)] [Bacillus (VF000000) - Exoenzyme (VFC0251)]

VFG012865 (ipaH) invasion plasmid antigen IpaH [TTSS secreted effectors (VF0978) - Effector delivery system (VFC0086)] [Pseudomonas (VF000000) - Motility (VFC0204)]

VFG001239(gb|NP\_249772) (flgF) flagellar basal-body rod protein FlgF [Flagella (VF0273) - Motility (VFC0204)] [Pseudomonas (VF000000) - Motility (VFC0204)]



VFG002071(gb|NP\_248775) (hcp1) type VI secretion system substrate Hcp1 [HSI-I (VF0334) - Effector delivery  
VFG038776(gb|WP\_016351320) (flgJ) flagellar rod assembly protein/muramidase FlgJ [Polar flagella (VF0473)  
VFG002513(gb|WP\_004197257) (flgG) flagellar basal body rod protein FlgG [Flagella (VF0430) - Motility (VFC0001)]  
VFG038464(gb|WP\_011707389) (tapT) twitching ATPase [Tap type IV pili (VF0475) - Adherence (VFC0001)]  
VFG037650 (pgaA) poly-beta-1,6 N-acetyl-D-glucosamine export porin PgaA [PNAG (VF0472) - Biofilm (VFC0001)]  
VFG038521(gb|WP\_016350155) (flpI) Flp pilus assembly protein FlpI [Flp type IV pili (VF0476) - Adherence (VFC0001)]  
VFG038832(gb|WP\_016351724) (pomB2) flagellar motor protein MotB [Polar flagella (VF0473) - Motility (VFC0001)]  
VFG002046(gb|WP\_000135089) (gspC) general secretion pathway protein C [T2SS (VF0333) - Effector delivery  
VFG002499(gb|WP\_004197164) (fliI) flagellum-specific ATP synthase FliI [Flagella (VF0430) - Motility (VFC0001)]  
VFG044159(gb|WP\_000125846) (fes) enterobactin/ferric enterobactin esterase [Enterobactin (VF0228) - Nutritional/Metabolic factor (VFC0001)]  
VFG001241(gb|NP\_249774) (flgH) flagellar L-ring protein precursor FlgH [Flagella (VF0273) - Motility (VFC0001)]  
VFG000909(gb|WP\_000768217) (focA) F1C major fimbrial subunit precursor [F1C fimbriae (VF0224) - Adherence (VFC0001)]  
VFG002055(gb|WP\_000097229) (gspL) general secretion pathway protein L [T2SS (VF0333) - Effector delivery  
VFG012335(gb|WP\_000975448) (sfaE) S fimbriae periplasmic chaperone SfaE [S fimbriae (VF0222) - Adherence (VFC0001)]  
VFG013292(gb|WP\_105163174) (lic3A) alpha-2,3-sialyltransferase [LOS (VF0044) - Immune modulation (VFC0001)]  
VFG000112(gb|NP\_253216) (pilB) type 4 fimbrial biogenesis protein PilB [Type IV pili (VF0082) - Adherence (VFC0001)]  
VFG002348(gb|WP\_005160443) (flgE) flagellar hook protein FlgE [Flagella (VF0394) - Motility (VFC0204)] [Yersinia enterocolitica]  
VFG048687(gb|WP\_002902160) (hcp/tssD) type VI secretion system protein, Hcp family [T6SS (VF0569) - Effector delivery  
VFG038448(gb|WP\_016351632) (tapN) type IV pilus biogenesis protein PilN [Tap type IV pili (VF0475) - Adherence (VFC0001)]  
VFG001386(gb|NP\_215271) (phoP) Possible two component system response transcriptional positive regulator PhoP [PhoP (VF0222) - Adherence (VFC0001)]  
VFG000895(gb|WP\_000654937) (papC) usher protein PapC [P fimbriae (VF0220) - Adherence (VFC0001)] [Escherichia coli]  
VFG002489(gb|WP\_181937968) (tssM-5) Type VI secretion system protein TssM [T6SS-1 (VF0429) - Effector delivery  
VFG050655(gb|WP\_000729757.1) (pilI) chemotaxis protein CheW [TFP (VF1334) - Adherence (VFC0001)] [Aeromonas hydrophila]  
VFG000139(gb|NP\_253697) (waaG) B-band O-antigen polymerase [LPS (VF0085) - Immune modulation (VFC0001)]  
VFG000916(gb|WP\_001017192) (chuS) heme oxygenase ChuS [Chu (VF0227) - Nutritional/Metabolic factor (VFC0001)]  
VFG049158(gb|WP\_001297937) (clbL) colibactin biosynthesis amidase ClbL [Colibactin (VF0573) - Exotoxin (VFC0001)]  
VFG045464(gb|WP\_000562556) (tcpC) Tir domain containing protein TcpC [TcpC (VF0413) - Immune modulation (VFC0001)]  
VFG045792(gb|WP\_000791650) (csgB) curlin minor subunit CsgB [Curli fibers (VF1138) - Adherence (VFC0001)]  
VFG044333(gb|WP\_015874968) (fyuA) yersiniabactin receptor FyuA [Ybt (VF0564) - Nutritional/Metabolic factor (VFC0001)]  
VFG002051(gb|WP\_001115126) (gspH) general secretion pathway protein H [T2SS (VF0333) - Effector delivery  
VFG038417(gb|WP\_016349294) (fimD) fimbrial chaperone protein [Type I pili (VF0486) - Adherence (VFC0001)]  
VFG006637(gb|WP\_001085308) (motB) flagellar motor protein [Flagella (VF0051) - Motility (VFC0204)] [Helicobacter pylori]  
VFG038381(gb|WP\_011705714) (atsG) Type VI secretion system protein [T6SS (VF0480) - Effector delivery system (VFC0001)]  
VFG001831(gb|WP\_010946191) (icmS) Dot/Icm type IV secretion system chaperone IcmS [Dot/Icm (VF0156) - Effector delivery system (VFC0001)]  
VFG038375(gb|WP\_011705710) (atsC) Type VI secretion system protein [T6SS (VF0480) - Effector delivery system (VFC0001)]  
VFG006217 (opa) outer membrane beta-barrel protein [Opa (VF0076) - Invasion (VFC0083)] [Neisseria meningitidis]  
VFG038703(gb|WP\_011705289) (cheZ) chemotaxis protein CheZ [Polar flagella (VF0473) - Motility (VFC0204)]  
VFG049148(gb|WP\_041168941) (clbB) colibactin hybrid non-ribosomal peptide synthetase/type I polyketide synthase [Colibactin (VF0573) - Exotoxin (VFC0001)]  
VFG045601(gb|WP\_010948560) (LPG\_RS14500) Dot/Icm type IV secretion system effector [Dot/Icm T4SS secretion system (VF0156) - Effector delivery system (VFC0001)]  
VFG050164(gb|WP\_000723250) (neuC) UDP-N-acetylglucosamine 2-epimerase [K1 capsule (VF0239) - Invasion (VFC0001)]  
VFG002225(gb|WP\_002963680) (gmd) GDP-mannose 4,6-dehydratase [LPS (VF0367) - Immune modulation (VFC0001)]  
VFG047401(gb|WP\_011242229) (feoB) Fe(2+) transporter permease subunit FeoB [FupA (VF0550) - Nutritional/Metabolic factor (VFC0001)]  
VFG000872(gb|WP\_000044711) (fimE) Type 1 fimbriae Regulatory protein fimE [Type 1 fimbriae (VF0221) - Adherence (VFC0001)]  
VFG000243(gb|WP\_002218264) (rfaC) lipopolysaccharide heptosyltransferase I [LOS (VF0078) - Immune modulation (VFC0001)]  
VFG038501(gb|WP\_043119142) (tapV) type IV pilus assembly protein TapV [Tap type IV pili (VF0475) - Adherence (VFC0001)]  
VFG038600(gb|WP\_016349156) (mshL) MSHA (mannose-sensitive hemagglutinin) pili biogenesis protein MshL [Pili (VF0475) - Adherence (VFC0001)]

VFG000154(gb|NP\_250123) (*lasI*) autoinducer synthesis protein LasI [Quorum sensing (VF0093) - Biofilm (VFC0001)]

VFG012597(gb|WP\_000089593) (*chuA*) Outer membrane heme/hemoglobin receptor ChuA [Chu (VF0234) - Nutritional/Metabolic factors (VFC0001)]

VFG001814(gb|NP\_215678) (*narH*) nitrate reductase subunit beta [Nitrate reductase (VF0302) - Nutritional/Metabolic factors (VFC0001)]

VFG047618(gb|WP\_003019748) (*ileP*) major facilitator transporter [IleP (VF0556) - Nutritional/Metabolic factors (VFC0001)]

VFG037612(gb|WP\_000603301) (*csuD*) Csu pilus usher protein CsuD [Csu fimbriae (VF0461) - Biofilm (VFC0001)]

VFG000918(gb|WP\_001312167) (*chuT*) periplasmic heme-binding protein ChuT [Chu (VF0227) - Nutritional/Metabolic factors (VFC0001)]

VFG037344(gb|WP\_000717759) (*basC*) acinetobactin biosynthesis protein BasC [Acinetobactin (VF0467) - Nutritional/Metabolic factors (VFC0001)]

VFG000001(gb|WP\_010930610) (*fhaB*) filamentous hemagglutinin/adhesin [FHA (VF0025) - Adherence (VFC0001)]

VFG000877(gb|WP\_001244821) (*fimF*) FimF protein precursor [Type 1 fimbriae (VF0221) - Adherence (VFC0001)]

VFG038886(gb|WP\_005314222) (*lafE*) LafE, flagellar hook control length protein [Lateral flagella (VF0474) - Motility (VFC0001)]

VFG038401(gb|WP\_011705724) (*atsQ*) Type VI secretion system protein [T6SS (VF0480) - Effector delivery system (VFC0001)]

VFG000940(gb|WP\_001299620) (*iucA*) aerobactin siderophore biosynthesis protein IucD [Aerobactin (VF0229) - Nutritional/Metabolic factors (VFC0001)]

VFG002278(gb|WP\_011010095) (*nagI*) hyaluronidase [Mu-toxin (VF0389) - Exoenzyme (VFC0251)] [Clostridium (VFC0001)]

VFG038635(gb|WP\_016350051) (*fliH*) flagellar assembly protein FliH [Polar flagella (VF0473) - Motility (VFC0001)]

VFG002413(gb|WP\_000389022) (*ykgK/ecpR*) regulator protein EcpR [ECP (VF0404) - Adherence (VFC0001)]

VFG038784(gb|WP\_011706638) (*flgH*) flagellar basal body L-ring protein [Polar flagella (VF0473) - Motility (VFC0001)]

VFG000175(gb|NP\_251786) (*xcpY*) general secretion pathway protein L [Xcp secretion system (VF0084) - Effector delivery system (VFC0001)]

VFG000974(gb|WP\_010922711) (*scpA/scpB*) streptococcal C5a peptidase [C5a peptidase (VF0245) - Adherence (VFC0001)]

VFG034915(gb|WP\_000225947) (*espY4*) Type III secretion system effector EspY4 [TTSS secreted effectors (VF01110) - Effector delivery system (VFC0001)]

VFG000165(gb|NP\_252915) (*pchF*) pyochelin synthetase PchF [Pyochelin (VF0095) - Nutritional/Metabolic factors (VFC0001)]

VFG038344(gb|WP\_005320766) (*ascX*) Unknown function, chaperoned by AscY [T3SS (VF0479) - Effector delivery system (VFC0001)]

VFG042736(gb|NP\_253152) (*rpoN*) RNA polymerase factor sigma-54 [Type IV pili (VF0082) - Adherence (VFC0001)]

VFG000009(gb|WP\_050849356) (*fimD*) fimbrial adhesin [Fimbriae (VF0031) - Adherence (VFC0001)] [Bordetella (VFC0001)]

VFG038865(gb|WP\_005314289) (*fliG*) flagellar motor switch protein G [Lateral flagella (VF0474) - Motility (VFC0001)]

VFG002358(gb|WP\_005164496) (*flhC*) flagellar biosynthesis transcription activator FlhC [Flagella (VF0394) - Motility (VFC0001)]

VFG002069(gb|NP\_248773) (*hsiB1/vipA/tssB*) type VI secretion system tubule-forming protein VipA [HSI-I (VF01110) - Effector delivery system (VFC0001)]

VFG010467(gb|WP\_010946665) (*pilP*) type IV pilus biogenesis protein PilP [Type IV pili (VF0155) - Adherence (VFC0001)]

VFG042734(gb|NP\_249343) (*vfr*) cAMP-regulatory protein [Type IV pili (VF0082) - Adherence (VFC0001)] [Pseudomonas (VFC0001)]

VFG034795 (*espN*) Type III secretion system effector EspN [TTSS secreted effectors (VF1110) - Effector delivery system (VFC0001)]

VFG041120(gb|WP\_011205628) (*BPS\_RS26880*) sensor histidine kinase VirA [T6SS-1 (VF0429) - Effector delivery system (VFC0001)]

VFG000332(gb|WP\_005632797) (*rfaD*) ADP-L-glycero-D-mannoheptose-6-epimerase [LOS (VF0044) - Immune modulation (VFC0258)]

VFG011826(gb|YP\_002343512) (*fliK*) flagellar hook-length control protein FliK [Flagella (VF0114) - Motility (VFC0001)]

VFG038699(gb|WP\_010634617) (*cheY*) chemotaxis protein CheY [Polar flagella (VF0473) - Motility (VFC0204)]

VFG000802(gb|WP\_000953255) (*escD*) Type III secretion system outer MS ring protein EscD [TTSS (VF0191) - Effector delivery system (VFC0001)]

VFG049164(gb|WP\_004175305) (*clbS*) colibactin self-protection protein ClbS [Colibactin (VF0573) - Exotoxin (VFC0001)]

VFG037852(gb|WP\_001075965) (*ACICU\_RS00395*) polysaccharide biosynthesis tyrosine autokinase [Capsule (VF0001) - Adherence (VFC0001)]

VFG001444(gb|AAG10151) (*aslA*) putative arylsulfatase [AslA (VF0238) - Invasion (VFC0083)] [Escherichia coli (VFC0001)]

VFG000618(gb|NP\_709457) (*iucD*) aerobactin synthesis protein IucC, lysine 6-monooxygenase [Aerobactin (VF0229) - Nutritional/Metabolic factors (VFC0001)]

VFG039400(gb|NP\_819902) (*cetCB4*) Coxiella Dot/Icm type IVB secretion system translocated effector [T4SS (VF0001) - Effector delivery system (VFC0001)]

VFG000333(gb|WP\_005694147) (*lic2A*) glycosyltransferase [LOS (VF0044) - Immune modulation (VFC0258)]

VFG048237(gb|WP\_002916189) (*fimE*) tyrosine recombinase [Type I fimbriae (VF0566) - Adherence (VFC0001)]

VFG038277(gb|WP\_016349336) (*exeE*) general secretory pathway protein E [Exe T2SS (VF0478) - Effector delivery system (VFC0001)]

VFG038391(gb|WP\_011705719) (*atsL*) Type VI secretion system protein [T6SS (VF0480) - Effector delivery system (VFC0001)]

VFG038493(gb|WP\_016349428) (*tppE*) type IV pilus pseudopilin [Tap type IV pili (VF0475) - Adherence (VFC0001)]

VFG038472(gb|WP\_011706550) (*tapW*) twitching ATPase [Tap type IV pili (VF0475) - Adherence (VFC0001)]

VFG000885(gb|WP\_000265729) (*papD*) chaperone protein PapD [P fimbriae (VF0220) - Adherence (VFC0001)]

VFG049917(gb|WP\_000508696) (rhs/PAAR) Type VI secretion system protein, PAAR family [T6SS (VF0579) - Effector delivery system (VFC00001)] [Aeromonas hydrophila (VF0473) - Motility (VFC0204)] [Aeromonas hydrophila (VF0473) - Motility (VFC0204)]

VFG038289(gb|WP\_016349339) (exeH) general secretion pathway protein H [Exe T2SS (VF0478) - Effector delivery system (VFC00001)] [Aeromonas hydrophila (VF0473) - Motility (VFC0204)] [Aeromonas hydrophila (VF0473) - Motility (VFC0204)]

VFG041033(gb|NP\_251051) (PA2361) hypothetical protein [HSI-3 (VF0944) - Effector delivery system (VFC00001)] [Aeromonas hydrophila (VF0473) - Motility (VFC0204)] [Aeromonas hydrophila (VF0473) - Motility (VFC0204)]

VFG038816(gb|WP\_011706646) (cheV) CheV [Polar flagella (VF0473) - Motility (VFC0204)] [Aeromonas hydrophila (VF0473) - Motility (VFC0204)] [Aeromonas hydrophila (VF0473) - Motility (VFC0204)]

VFG049152(gb|WP\_000337350) (clbF) colibactin biosynthesis dehydrogenase ClbF [Colibactin (VF0573) - Exotoxin (VFC0235)] [Clostridium difficile 630 (VF0377) - Exotoxin (VFC0235)] [Clostridium difficile 630 (VF0377) - Exotoxin (VFC0235)]

VFG000007(gb|WP\_010930611) (fimB) chaperone protein [Fimbriae (VF0031) - Adherence (VFC0001)] [Bordetella pertussis (VF0031) - Adherence (VFC0001)] [Bordetella pertussis (VF0031) - Adherence (VFC0001)]

VFG038533(gb|WP\_016350152) (flpF) traffic ATPase [Flp type IV pili (VF0476) - Adherence (VFC0001)] [Aeromonas hydrophila (VF0476) - Adherence (VFC0001)] [Aeromonas hydrophila (VF0476) - Adherence (VFC0001)]

VFG000358(gb|WP\_002212885) (fyuA/psn) pesticin/yersiniabactin receptor protein [Yersiniabactin (VF0136) - Nutritional/Metabolic factor (VFC025)] [Yersinia enterocolitica (VF0136) - Nutritional/Metabolic factor (VFC025)] [Yersinia enterocolitica (VF0136) - Nutritional/Metabolic factor (VFC025)]

VFG011414(gb|WP\_002964262) (kdsA) 2-dehydro-3-deoxyphosphooctonate aldolase [LPS (VF0367) - Immune modulation (VFC025)] [Aeromonas hydrophila (VF0367) - Immune modulation (VFC025)] [Aeromonas hydrophila (VF0367) - Immune modulation (VFC025)]

VFG041330(gb|WP\_010948110) (lem23) Dot/Icm type IV secretion system effector Lem23 [Dot/Icm T4SS secretion system (VF0031) - Adherence (VFC0001)] [Bordetella pertussis (VF0031) - Adherence (VFC0001)] [Bordetella pertussis (VF0031) - Adherence (VFC0001)]

VFG000920(gb|WP\_000020034) (chuX) putative heme-binding protein ChuX [Chu (VF0227) - Nutritional/Metabolic factor (VFC025)] [Yersinia enterocolitica (VF0227) - Nutritional/Metabolic factor (VFC025)] [Yersinia enterocolitica (VF0227) - Nutritional/Metabolic factor (VFC025)]

VFG048654(gb|WP\_004224345) (vasE/tssK) type VI secretion system baseplate subunit TssK [T6SS (VF0569) - Effector delivery system (VFC00001)] [Aeromonas hydrophila (VF0569) - Effector delivery system (VFC00001)] [Aeromonas hydrophila (VF0569) - Effector delivery system (VFC00001)]

VFG034624(gb|WP\_000755097) (cfaB) colonization factor antigen 1 [Adhesive fimbriae (VF0213) - Adherence (VFC0001)] [Bordetella pertussis (VF0213) - Adherence (VFC0001)] [Bordetella pertussis (VF0213) - Adherence (VFC0001)]

VFG001420(gb|NP\_218327) (erp) exported repetitive protein precursor Erp [Erp (VF0312) - Others (VFC0346)] [Aeromonas hydrophila (VF0312) - Others (VFC0346)] [Aeromonas hydrophila (VF0312) - Others (VFC0346)]

VFG038687(gb|WP\_016350057) (flhF) flagellar biosynthesis protein FlhF [Polar flagella (VF0473) - Motility (VFC0204)] [Aeromonas hydrophila (VF0473) - Motility (VFC0204)] [Aeromonas hydrophila (VF0473) - Motility (VFC0204)]

VFG043640(gb|WP\_043921118) (VV1\_RS15640) VWA domain-containing protein [Flp pili (VF0612) - Adherence (VFC0001)] [Aeromonas hydrophila (VF0612) - Adherence (VFC0001)] [Aeromonas hydrophila (VF0612) - Adherence (VFC0001)]

VFG000204(gb|NP\_250400) (popD) type III secretion system hydrophobic translocator, pore protein PopD [TTSS secreted effectors (VF0031) - Adherence (VFC0001)] [Bordetella pertussis (VF0031) - Adherence (VFC0001)] [Bordetella pertussis (VF0031) - Adherence (VFC0001)]

VFG044335(gb|WP\_015874980) (iroB) glucosyltransferase IroB [Sal (VF0563) - Nutritional/Metabolic factor (VFC025)] [Yersinia enterocolitica (VF0563) - Nutritional/Metabolic factor (VFC025)] [Yersinia enterocolitica (VF0563) - Nutritional/Metabolic factor (VFC025)]

VFG038505(gb|WP\_011705643) (tapF) type IV pilus biogenesis/stability protein, pilW-like [Tap type IV pili (VF0476) - Adherence (VFC0001)] [Aeromonas hydrophila (VF0476) - Adherence (VFC0001)] [Aeromonas hydrophila (VF0476) - Adherence (VFC0001)]

VFG000028(gb|WP\_003808614) (brkB) serum resistance protein [Brk (VF0034) - Immune modulation (VFC025)] [Yersinia enterocolitica (VF0034) - Immune modulation (VFC025)] [Yersinia enterocolitica (VF0034) - Immune modulation (VFC025)]

VFG038529(gb|WP\_016350153) (flpG) Flp pilus assembly protein FlpG [Flp type IV pili (VF0476) - Adherence (VFC0001)] [Aeromonas hydrophila (VF0476) - Adherence (VFC0001)] [Aeromonas hydrophila (VF0476) - Adherence (VFC0001)]

VFG038869(gb|WP\_005314279) (lfgN) lateral flagellar protein, LfgN [Lateral flagella (VF0474) - Motility (VFC0204)] [Aeromonas hydrophila (VF0474) - Motility (VFC0204)] [Aeromonas hydrophila (VF0474) - Motility (VFC0204)]

VFG000862(gb|WP\_014639426) (pet) Pet serine protease precursor, autotransporter [Pet (VF0217) - Effector delivery system (VFC00001)] [Aeromonas hydrophila (VF0217) - Effector delivery system (VFC00001)] [Aeromonas hydrophila (VF0217) - Effector delivery system (VFC00001)]

VFG000166(gb|NP\_252916) (pchE) dihydroaeruginic acid synthetase PchE [Pyochelin (VF0095) - Nutritional/Metabolic factor (VFC025)] [Yersinia enterocolitica (VF0095) - Nutritional/Metabolic factor (VFC025)] [Yersinia enterocolitica (VF0095) - Nutritional/Metabolic factor (VFC025)]

VFG037521(gb|WP\_000837764) (ACICU\_RS04595) TonB family protein [HemO cluster (VF0636) - Nutritional/Metabolic factor (VFC025)] [Yersinia enterocolitica (VF0636) - Nutritional/Metabolic factor (VFC025)] [Yersinia enterocolitica (VF0636) - Nutritional/Metabolic factor (VFC025)]

VFG038305(gb|WP\_016349343) (exeL) general secretion pathway protein L [Exe T2SS (VF0478) - Effector delivery system (VFC00001)] [Aeromonas hydrophila (VF0478) - Effector delivery system (VFC00001)] [Aeromonas hydrophila (VF0478) - Effector delivery system (VFC00001)]

VFG038155(gb|WP\_000209960) (ACICU\_RS00500) phosphomannomutase/phosphoglucomutase [Capsule (VF0560) - Immune modulation (VFC025)] [Yersinia enterocolitica (VF0560) - Immune modulation (VFC025)] [Yersinia enterocolitica (VF0560) - Immune modulation (VFC025)]

VFG000361(gb|WP\_000982866) (ybtU) yersiniabactin biosynthetic protein YbtU [Yersiniabactin (VF0136) - Nutritional/Metabolic factor (VFC025)] [Yersinia enterocolitica (VF0136) - Nutritional/Metabolic factor (VFC025)] [Yersinia enterocolitica (VF0136) - Nutritional/Metabolic factor (VFC025)]

VFG002531(gb|WP\_011205291) (cheA) chemotaxis two-component sensor kinase CheA [Flagella (VF0430) - Motility (VFC0204)] [Aeromonas hydrophila (VF0430) - Motility (VFC0204)] [Aeromonas hydrophila (VF0430) - Motility (VFC0204)]

VFG049133(gb|WP\_004177236) (acrA) acriflavine resistance protein A [AcrAB (VF0568) - Antimicrobial activity (VFC0346)] [Aeromonas hydrophila (VF0568) - Antimicrobial activity (VFC0346)] [Aeromonas hydrophila (VF0568) - Antimicrobial activity (VFC0346)]

VFG001142(gb|WP\_042960771) (hopZ) outer membrane protein adhesin [HopZ (VF0054) - Adherence (VFC0001)] [Bordetella pertussis (VF0054) - Adherence (VFC0001)] [Bordetella pertussis (VF0054) - Adherence (VFC0001)]

VFG000368(gb|WP\_000703040) (ybtS) salicylate synthase Irp9 [Yersiniabactin (VF0136) - Nutritional/Metabolic factor (VFC025)] [Yersinia enterocolitica (VF0136) - Nutritional/Metabolic factor (VFC025)] [Yersinia enterocolitica (VF0136) - Nutritional/Metabolic factor (VFC025)]

VFG022019(gb|NP\_214796) (eccA3) Type VII secretion system protein EccA3 [ESX-3 (VF0521) - Effector delivery system (VFC00001)] [Mycobacterium tuberculosis (VF0521) - Effector delivery system (VFC00001)] [Mycobacterium tuberculosis (VF0521) - Effector delivery system (VFC00001)]

VFG034825(gb|WP\_000484279) (espR3) Type III secretion system effector espR3 [TTSS secreted effectors (VF0031) - Adherence (VFC0001)] [Bordetella pertussis (VF0031) - Adherence (VFC0001)] [Bordetella pertussis (VF0031) - Adherence (VFC0001)]

VFG048990(gb|WP\_001741945) (galF) GalU regulator GalF [Capsule (VF0560) - Immune modulation (VFC025)] [Yersinia enterocolitica (VF0560) - Immune modulation (VFC025)] [Yersinia enterocolitica (VF0560) - Immune modulation (VFC025)]

VFG000477(gb|NP\_461845) (rpoS) RNA polymerase sigma factor RpoS [RpoS (VF0112) - Regulation (VFC0346)] [Aeromonas hydrophila (VF0112) - Regulation (VFC0346)] [Aeromonas hydrophila (VF0112) - Regulation (VFC0346)]

VFG038764(gb|WP\_017409846) (flrA) FleQ protein [Polar flagella (VF0473) - Motility (VFC0204)] [Aeromonas hydrophila (VF0473) - Motility (VFC0204)] [Aeromonas hydrophila (VF0473) - Motility (VFC0204)]

VFG038873(gb|WP\_005314270) (flgC) flagellar basal body rod protein FlgC [Lateral flagella (VF0474) - Motility (VFC0204)] [Aeromonas hydrophila (VF0474) - Motility (VFC0204)] [Aeromonas hydrophila (VF0474) - Motility (VFC0204)]

VFG002054(gb|WP\_000633233) (gspK) general secretion pathway protein K [T2SS (VF0333) - Effector delivery system (VFC00001)] [Aeromonas hydrophila (VF0333) - Effector delivery system (VFC00001)] [Aeromonas hydrophila (VF0333) - Effector delivery system (VFC00001)]

VFG001269(gb|WP\_010929996) (cyaB) cyclolysin secretion ATP-binding protein [Cya (VF0028) - Exotoxin (VFC0235)] [Yersinia enterocolitica (VF0028) - Exotoxin (VFC0235)] [Yersinia enterocolitica (VF0028) - Exotoxin (VFC0235)]

VFG000813(gb|WP\_001037814) (escV) Type III secretion system major export apparatus protein [TTSS (VF019) - Adherence (VFC0001)] [Bordetella pertussis (VF019) - Adherence (VFC0001)] [Bordetella pertussis (VF019) - Adherence (VFC0001)]

VFG001263(gb|NP\_250143) (flhA) flagellar biosynthesis protein FlhA [Flagella (VF0273) - Motility (VFC0204)] [Aeromonas hydrophila (VF0273) - Motility (VFC0204)] [Aeromonas hydrophila (VF0273) - Motility (VFC0204)]

VFG039912(gb|WP\_011191202) (rvhB4b) type IV secretion system protein VirB4 precursor [Rvh T4SS (VF048) - Adherence (VFC0001)] [Bordetella pertussis (VF048) - Adherence (VFC0001)] [Bordetella pertussis (VF048) - Adherence (VFC0001)]

VFG001400(gb|NP\_216865) (plcC) phospholipase C [Phospholipase C (VF0320) - Exotoxin (VFC0235)] [Mycobacterium tuberculosis (VF0320) - Exotoxin (VFC0235)] [Mycobacterium tuberculosis (VF0320) - Exotoxin (VFC0235)]

VFG002288(gb|WP\_009902069) (toxB) toxin B [TcdB (VF0377) - Exotoxin (VFC0235)] [Clostridium difficile 630 (VF0377) - Exotoxin (VFC0235)] [Clostridium difficile 630 (VF0377) - Exotoxin (VFC0235)]

VFG002287(gb|WP\_011860904) (toxA) toxin A [TcdA (VF0376) - Exotoxin (VFC0235)] [Clostridium difficile 630 (VF0376) - Exotoxin (VFC0235)] [Clostridium difficile 630 (VF0376) - Exotoxin (VFC0235)]

VFG049909(gb|WP\_001113715) (fha) Type VI secretion system protein Fha [T6SS (VF0579) - Effector delivery system (VFC0001)]

VFG000184(gb|NP\_251795) (xcpQ) general secretion pathway protein D [Xcp secretion system (VF0084) - Effector delivery system (VFC0001)]

VFG050161(gb|WP\_000579525) (kpsC) Capsule polysaccharide export protein [K1 capsule (VF0239) - Invasion (VFC0001)]

VFG000915(gb|WP\_001234179) (focH) F1C Putative fimbrial adhesin precursor [F1C fimbriae (VF0224) - Adherence (VFC0001)]

VFG038596(gb|WP\_016349157) (mshM) membrane protein with ATPase domain, GspA-like [MSHA type IV pili (VF0431) - Adherence (VFC0001)]

VFG002534(gb|WP\_004198197) (motA) flagellar motor protein MotA [Flagella (VF0430) - Motility (VFC0204)]

VFG000873(gb|WP\_000695571) (fimA) Type-1 fimbrial protein, A chain precursor [Type 1 fimbriae (VF0221) - Adherence (VFC0001)]

VFG005653 (nanA) neuraminidase A [Neuraminidase (VF0148) - Exoenzyme (VFC0251)] [Streptococcus pneumoniae (VF0001)]

VFG000157(gb|NP\_249535) (plcH) hemolytic phospholipase C precursor [PLC (VF0092) - Exotoxin (VFC0235)] [Streptococcus pneumoniae (VF0001)]

VFG045794(gb|WP\_000992818) (csgC) curli assembly protein CsgC [Curli fibers (VF1138) - Adherence (VFC0001)]

VFG022082(gb|YP\_177711) (PPE4) PPE family protein [ESX-3 (VF0521) - Effector delivery system (VFC0086)] [Mycobacterium tuberculosis (VF0001)]

VFG045481(gb|WP\_010945891) (LPG\_RS00665) hypothetical protein [Dot/Icm T4SS secreted effectors (VF079) - Invasion (VFC0001)]

VFG002048(gb|WP\_000249362) (gspE) general secretion pathway protein E [T2SS (VF0333) - Effector delivery system (VFC0001)]

VFG037720(gb|WP\_001027056) (adeG) cation/multidrug efflux pump [AdeFGH efflux pump (VF0504) - Biofilm formation (VFC0001)]

VFG034636(gb|WP\_000358674) (cfaC) colonisation factor antigen c, usher [Adhesive fimbriae (VF0213) - Adherence (VFC0001)]

VFG045343(gb|WP\_002210880) (yapJ) autotransporter protein YapJ [YapJ (VF0509) - Adherence (VFC0001)] [Yersinia enterocolitica (VF0001)]

VFG038804(gb|WP\_011706643) (flgC) flagellar basal body rod protein FlgC [Polar flagella (VF0473) - Motility (VFC0204)]

VFG000936(gb|WP\_016265865) (iutA) ferric aerobactin receptor precursor IutA [Aerobactin (VF0229) - Nutrition (VFC0001)]

VFG048676(gb|WP\_014907726) (ompA) OmpA family protein [T6SS (VF0569) - Effector delivery system (VFC0001)]

VFG002426(gb|WP\_004194352) (pilB) type IV pilus assembly protein [Type IV pili (VF0431) - Adherence (VFC0001)]

VFG043626(gb|WP\_000820818) (mrkB) fimbrial chaperone protein mrkB precursor [Type 3 fimbriae (VF0567) - Adherence (VFC0001)]

VFG045345(gb|WP\_005457104) (mam7) multivalent adhesion molecule MAM7 [MAM7 (VF0512) - Adherence (VFC0001)]

VFG038845(gb|WP\_016351249) (nueA) NeuA protein [Polar flagella (VF0473) - Motility (VFC0204)] [Aeromonas hydrophila (VF0001)]

VFG000008(gb|WP\_010930612) (fimC) outer membrane usher protein precursor [Fimbriae (VF0031) - Adherence (VFC0001)]

VFG002089(gb|WP\_000073077) (vasL) type VI secretion system protein VasL [VAS T6SS (VF0335) - Effector delivery system (VFC0001)]

VFG000935(gb|WP\_001222189) (iroN) salmochelin receptor IroN [Salmochelin siderophore (VF0230) - Nutrition (VFC0001)]

VFG034873(gb|WP\_001270084) (espX5) Type III secretion system effector EspX5 [TTSS secreted effectors (VF0001)]

VFG038796(gb|WP\_016351321) (flgE) flagellar hook protein FlgE [Polar flagella (VF0473) - Motility (VFC0204)]

VFG048708(gb|WP\_041168969) (vgrG/tssI) type VI secretion system tip protein VgrG [T6SS (VF0569) - Effector delivery system (VFC0001)]

VFG005361(gb|WP\_002352221) (spaP/pac) cell surface antigen SpaP [SpaP (VF0526) - Adherence (VFC0001)]

VFG048439(gb|WP\_014907941) (entC) isochorismate synthase [Ent (VF0562) - Nutritional/Metabolic factor (VFC0001)]

VFG000886(gb|WP\_000261297) (papJ) P pilus assembly protein PapJ [P fimbriae (VF0220) - Adherence (VFC0001)]

VFG001360(gb|WP\_001042179) (nanB) neuraminidase B [Neuraminidase (VF0148) - Exoenzyme (VFC0251)] [Streptococcus pneumoniae (VF0001)]

VFG044165(gb|WP\_001041793) (entS) enterobactin exporter, iron-regulated [Enterobactin (VF0228) - Nutrition (VFC0001)]

VFG001408(gb|NP\_217456) (mas) multifunctional mycocerosic acid synthase [PDIM (VF0309) - Immune modulation (VFC0001)]

VFG000190(gb|NP\_250386) (pscP) type III secretion system protein PscP [TTSS (VF0083) - Effector delivery system (VFC0001)]

VFG043648(gb|NP\_252312) (rpoS) RNA polymerase sigma factor RpoS [Type IV pili (VF0082) - Adherence (VFC0001)]

VFG024776(gb|NP\_217466) (fadD29) long-chain-fatty-acid--AMP ligase FadD29 [PDIM (VF0309) - Immune modulation (VFC0001)]

VFG000174(gb|NP\_251785) (xcpZ) general secretion pathway protein M [Xcp secretion system (VF0084) - Effector delivery system (VFC0001)]

VFG041016(gb|NP\_250349) (PA1658) hypothetical protein [HSI-2 (VF0943) - Effector delivery system (VFC0001)]

VFG000478(gb|NP\_459678) (fur) ferric iron uptake transcriptional regulator [Fur (VF0113) - Regulation (VFC0001)]

VFG001257(gb|NP\_250135) (fliN) flagellar motor switch protein FliN [Flagella (VF0273) - Motility (VFC0204)]

VFG048307(gb|WP\_041937815) (fimH) type 1 fimbrial adhesin precursor [Type I fimbriae (VF0566) - Adherence (VFC0001)]

VFG050342(gb|WP\_000076098.1) (pilO) type 4a pilus biogenesis protein PilO [TFP (VF1334) - Adherence (VFC0001)]

VFG041013(gb|NP\_250203) (hcpA) secreted protein Hcp [HSI-2 (VF0943) - Effector delivery system (VFC0086)]

VFG000811(gb|WP\_001062956) (escO) positive regulator EscO [TTSS (VF0191) - Effector delivery system (VFC0001)]

VFG041029(gb|NP\_250362) (stk1) serine-threonine kinase Stk1 [HSI-2 (VF0943) - Effector delivery system (VFC0001)] [Mycobacterium tuberculosis H37Rv]

VFG010850 (rtxA) structural toxin protein RtxA [RtxA (VF0259) - Exotoxin (VFC0235)] [Legionella pneumophila Philadelphia 1]

VFG001932(gb|YP\_002343539) (cdtC) cytolethal distending toxin C [CDT (VF0115) - Exotoxin (VFC0235)] [Clostridium difficile 63001]

VFG002164(gb|WP\_002395058) (prgB/asc10) aggregation substance PrgB/Asc10 [AS (VF0352) - Adherence (VFC0001)] [Yersinia enterocolitica 480/89]

VFG001396(gb|NP\_216424) (katG) catalase-peroxidase [KatG (VF0303) - Stress survival (VFC0282)] [Mycobacterium tuberculosis H37Rv]

VFG042738(gb|NP\_253646) (fimX) protein FimX [Type IV pili (VF0082) - Adherence (VFC0001)] [Pseudomonas aeruginosa PAO1]

VFG038132(gb|WP\_000045495) (pgi) glucose-6-phosphate isomerase [Capsule (VF0465) - Immune modulation (VFC0258)] [Neisseria meningitidis MC58]

VFG001224(gb|NP\_249087) (pilU) twitching motility protein PilU [Type IV pili (VF0082) - Adherence (VFC0001)] [Pseudomonas aeruginosa PAO1]

VFG042068(gb|NP\_459947) (sopD2) type III secretion system effector SopD2 [TTSS-2 secreted effectors (VF0943) - Effector delivery system (VFC0001)] [Yersinia enterocolitica 480/89]

VFG038395(gb|WP\_011705721) (clpB) type VI secretion system ATPase ClpV1 [T6SS (VF0480) - Effector delivery system (VFC0001)] [Pseudomonas aeruginosa PAO1]

VFG013368(gb|WP\_005693225) (rffG) dTDP-glucose 46-dehydratase [LOS (VF0044) - Immune modulation (VFC0258)] [Neisseria meningitidis MC58]

VFG034679(gb|WP\_000074207) (ibeB) Cu(+)/Ag(+) efflux RND transporter outer membrane channel CusC [IbeB (VF0352) - Effector delivery system (VFC0001)] [Yersinia enterocolitica 480/89]

VFG036992(gb|WP\_002224969) (mtrD) multiple transferable resistance system protein MtrD [MtrCDE (VF0451) - Effector delivery system (VFC0001)] [Yersinia enterocolitica 480/89]

VFG038663(gb|WP\_005298795) (fliO) flagellar biosynthesis protein, FliO [Polar flagella (VF0473) - Motility (VFC0204)] [Pseudomonas aeruginosa PAO1]

VFG048797(gb|WP\_004175261) (ugd) UDP-glucose 6-dehydrogenase [Capsule (VF0560) - Immune modulation (VFC0258)] [Neisseria meningitidis MC58]

VFG034866(gb|WP\_000900547) (espX4) Type III secretion system effector EspX4 [TTSS secreted effectors (VF0943) - Effector delivery system (VFC0001)] [Yersinia enterocolitica 480/89]

VFG002053(gb|WP\_001250462) (gspJ) general secretion pathway protein J [T2SS (VF0333) - Effector delivery system (VFC0001)] [Yersinia enterocolitica 480/89]

VFG005289(gb|WP\_001868236) (GBS\_RS03585) tip adhesin protein [PI-1 (VF0527) - Adherence (VFC0001)] [Group B Streptococcus ATCC 25962]

VFG038176(gb|WP\_000777882) (ompA) outer membrane protein OmpA [OmpA (VF0464) - Immune modulation (VFC0258)] [Neisseria meningitidis MC58]

VFG001012(gb|NP\_858286) (spa24) type III secretion system minor export apparatus protein Spa24 [TTSS (VF0943) - Effector delivery system (VFC0001)] [Yersinia enterocolitica 480/89]

VFG001817(gb|NP\_216900) (mbtA) Bifunctional enzyme MbtA: salicyl-AMP ligase (SAL-AMP ligase) + salicyl-AMP lyase [MbtA (VF0352) - Effector delivery system (VFC0001)] [Yersinia enterocolitica 480/89]

VFG013260(gb|WP\_010868968) (lgtC) glycosyltransferase [LOS (VF0044) - Immune modulation (VFC0258)] [Neisseria meningitidis MC58]

VFG000906(gb|WP\_001142375) (hlyA) Hemolysin A [-Hemolysin (VF0225) - Exotoxin (VFC0235)] [Escherichia coli O157:H7]

VFG000939(gb|WP\_001287497) (iucB) aerobactin siderophore biosynthesis protein IucB [Aerobactin (VF0229) - Nutritional/Metabolic factor (VFC0204)] [Yersinia enterocolitica 480/89]

VFG000163(gb|NP\_251088) (fpvA) ferripyoverdine receptor FpvA [Pyoverdine (VF0094) - Nutritional/Metabolic factor (VFC0204)] [Pseudomonas aeruginosa PAO1]

VFG044081(gb|NP\_250946) (pvcC) paerucumarin biosynthesis protein PvcC [Pyoverdine (VF0094) - Nutritional/Metabolic factor (VFC0204)] [Pseudomonas aeruginosa PAO1]

VFG048348(gb|WP\_004149658) (mrkJ) phosphodiesterase [Type 3 fimbriae (VF0567) - Biofilm (VFC0271)] [Klebsiella pneumoniae ATCC 49619]

VFG038723(gb|WP\_011705294) (AHML\_RS07540) CobQ/CobB/MinD/ParA family protein [Polar flagella (VF0473) - Motility (VFC0204)] [Coxiella burnetii QJ]

VFG039311(gb|NP\_819427) (cetCb2) Coxiella Dot/Icm type IVB secretion system translocated effector [T4SS secreted effectors (VF0943) - Effector delivery system (VFC0001)] [Coxiella burnetii QJ]

VFG000845(gb|WP\_000581721) (toxB) cytotoxin [ToxB (VF0203) - Effector delivery system (VFC0086)] [Escherichia coli O157:H7]

VFG038364(gb|WP\_005320615) (aexT) Type III secretion system effector AexT, bifunctional toxin with GTPase activity [AexT (VF0352) - Effector delivery system (VFC0001)] [Yersinia enterocolitica 480/89]

VFG049902(gb|WP\_011310140) (tssM) Type VI secretion system protein TssM [T6SS (VF0579) - Effector delivery system (VFC0001)] [Pseudomonas aeruginosa PAO1]

VFG001238(gb|NP\_249771) (flgE) flagellar hook protein FlgE [Flagella (VF0273) - Motility (VFC0204)] [Pseudomonas aeruginosa PAO1]

VFG015983(gb|NP\_251083) (pvdM) dipeptidase precursor [Pyoverdine (VF0094) - Nutritional/Metabolic factor (VFC0204)] [Pseudomonas aeruginosa PAO1]

VFG049124(gb|WP\_012737540) (allD) ureidoglycolate dehydrogenase [Allantion utilization (VF0572) - Nutritional/Metabolic factor (VFC0204)] [Pseudomonas aeruginosa PAO1]

VFG038651(gb|WP\_011705278) (fliL) flagellar basal body-associated protein FliL [Polar flagella (VF0473) - Motility (VFC0204)] [Pseudomonas aeruginosa PAO1]

VFG000903(gb|WP\_001045652) (pic) Pic serine protease precursor, autotransporter [Pic (VF0232) - Effector delivery system (VFC0001)] [Yersinia enterocolitica 480/89]

VFG038281(gb|WP\_016349337) (exeF) general secretion pathway protein F [Exe T2SS (VF0478) - Effector delivery system (VFC0001)] [Yersinia enterocolitica 480/89]

VFG038545(gb|WP\_043118798) (flpC) Flp pilus secretin FlpC [Flp type IV pili (VF0476) - Adherence (VFC0001)] [Yersinia enterocolitica 480/89]

VFG001259(gb|NP\_250137) (fliP) flagellar biosynthetic protein FliP [Flagella (VF0273) - Motility (VFC0204)] [Pseudomonas aeruginosa PAO1]

VFG049154(gb|WP\_014907257) (clbH) colibactin non-ribosomal peptide synthetase ClbH [Colibactin (VF0573) - Effector delivery system (VFC0001)] [Yersinia enterocolitica 480/89]

VFG047068(gb|WP\_003022285) (wzx) O-antigen flippase [LPS (VF0542) - Immune modulation (VFC0258)] [Pseudomonas aeruginosa PAO1]

VFG048621(gb|WP\_004213924) (iutA) ferric aerobactin receptor IutA [Aerobactin (VF0565) - Nutritional/Metabolic factor (VFC0204)] [Yersinia enterocolitica 480/89]

VFG047055(gb|WP\_003022283) (wbtK) glycosyltransferase [LPS (VF0542) - Immune modulation (VFC0258)] [Pseudomonas aeruginosa PAO1]

VFG012603(gb|WP\_001302516) (chuT) periplasmic heme-binding protein ChuT [Chu (VF0234) - Nutritional/Metabolic factor (VFC0204)] [Pseudomonas aeruginosa PAO1]

VFG000126(gb|NP\_252234) (algE) alginate biosynthetic protein AlgK precursor [Alginate (VF0091) - Biofilm (VFC0271)] [Pseudomonas aeruginosa PAO1]

VFG038497(gb|WP\_016351992) (tppF) type IV pilus pseudopilin [Tap type IV pili (VF0475) - Adherence (VFC0271)]

VFG037274(gb|WP\_001281538) (barA) siderophore efflux system of the ABC superfamily [Acinetobactin (VF000065) - Nutritional/Metabolic factor (VF000065)]

VFG000065(gb|WP\_010930832) (bscD) putative type III secretion protein [TTSS (VF0035) - Effector delivery system (VF0035)]

VFG037625(gb|WP\_001022730) (csuE) Csu pilus tip adhesin CsuE [Csu fimbriae (VF0461) - Biofilm (VFC0271)]

VFG048478(gb|WP\_004147521) (fepG) iron-enterobactin transporter permease [Ent (VF0562) - Nutritional/Metabolic factor (VF0562)]

VFG001218(gb|NP\_253727) (pilQ) type 4 fimbrial biogenesis protein PilQ [Type IV pili (VF0082) - Adherence (VFC0001)]

VFG049914(gb|WP\_000037389) (tssB) Type VI secretion system protein TssB [T6SS (VF0579) - Effector delivery system (VF0579)]

VFG000367(gb|WP\_001286280) (ybtX) putative signal transducer [Yersiniabactin (VF0136) - Nutritional/Metabolic factor (VF0136)]

VFG038348(gb|WP\_005320755) (ascN) Type III secretion system ATPase [T3SS (VF0479) - Effector delivery system (VF0479)]

VFG048665(gb|WP\_004176431) (dotU/tssL) type VI secretion system protein, DotU/TssL family [T6SS (VF0562) - Effector delivery system (VF0562)]

VFG043373(gb|WP\_000342347) (cheA) histidine kinase CheA [Flagella (VF0051) - Motility (VFC0204)] [Helicobacter (VF0051)]

VFG048468(gb|WP\_004176917) (fepD) iron-enterobactin transporter membrane protein [Ent (VF0562) - Nutritional/Metabolic factor (VF0562)]

VFG034875(gb|WP\_001270087) (espX5) Type III secretion system effector EspX5 [TTSS secreted effectors (VF0035) - Effector delivery system (VF0035)]

VFG001919(gb|YP\_002344702) (pseG) UDP-2,4-diacetamido-2,4,6-trideoxy-beta-L-altropyranose hydrolase [Flavobacterium (VF001919)]

VFG011671(gb|YP\_002344801) (Cj1418c) hypothetical protein [Capsule (VF0323) - Immune modulation (VFC0258)]

VFG000123(gb|NP\_252231) (alg8) alginate-c5-mannuronan-epimerase AlgG [Alginate (VF0091) - Biofilm (VFC0204)]

VFG048257(gb|WP\_004174507) (fimI) type 1 pilus biosynthesis fimbrial protein [Type I fimbriae (VF0566) - Adherence (VFC0258)]

VFG000319 (wbpB) lipopolysaccharide biosynthesis protein [LPS (VF0056) - Immune modulation (VFC0258)]

VFG000162(gb|NP\_251116) (pvdS) extracytoplasmic-function sigma-70 factor [Pyoverdine (VF0094) - Nutritional/Metabolic factor (VF0094)]

VFG002300(gb|CAA88565) (tcnA) alpha-toxin [Alpha-toxin (novyi) (VF0386) - Exotoxin (VFC0235)] [Clostridium (VF0386)]

VFG038387(gb|WP\_011705717) (atsJ) Type VI secretion system protein [T6SS (VF0480) - Effector delivery system (VF0480)]

VFG012509(gb|WP\_001111200) (iroC) ATP binding cassette transporter [Salmochelinsiderophore (VF0230) - Nutritional/Metabolic factor (VF0230)]

VFG048779(gb|WP\_004190503) (tssG) type VI secretion system baseplate subunit TssG [T6SS (VF0569) - Effector delivery system (VF0569)]

VFG000366(gb|WP\_002212761) (ybtQ) yersiniabactin ABC transporter ATP-binding/permease protein YbtQ [Yersiniabactin (VF0136) - Nutritional/Metabolic factor (VF0136)]

VFG002050(gb|WP\_001087302) (gspG) general secretion pathway protein G [T2SS (VF0333) - Effector delivery system (VF0333)]

VFG045632(gb|WP\_002286924) (ecbA/fss3) Collagen binding MSCRAMM, EcbA/Fss3 [EcbA (VF0539) - Adherence (VFC0258)]

VFG034761(gb|WP\_001121629) (espL2) Type III secretion system secreted effector EspL2, cysteine protease [Type III secretion system (VF0035) - Effector delivery system (VF0035)]

VFG005197(gb|WP\_000006706) (pavA) Fibronectin-binding protein-like protein A [PavA (VF0283) - Adherence (VFC0258)]

VFG039517 (CBU\_1525\*) Coxiella Dot/Icm type IVB secretion system translocated effector [T4SS secreted effectors (VF039517) - Effector delivery system (VF039517)]

VFG001413(gb|NP\_217803) (sigF) RNA polymerase sigma factor SigF [SigF (VF0294) - Regulation (VFC0301)]

VFG001445(gb|AAA92657) (AAA92657) unknown protein [TraJ (VF0241) - Invasion (VFC0083)] [Escherichia coli (VF0241)]

VFG037177(gb|WP\_000632986) (plc2) phospholipase C [Phospholipase C (VF0470) - Exotoxin (VFC0235)] [Aeromonas (VF0470)]

VFG000029(gb|WP\_010929608) (bplL) lipopolysaccharide biosynthesis protein [LPS (VF0033) - Immune modulation (VFC0258)]

VFG050166(gb|WP\_000066003) (neuB) N-acylneuraminate-9-phosphate synthase [K1 capsule (VF0239) - Invasion (VFC0083)]

VFG038460(gb|WP\_043119325) (tapQ) type IV pilus secretin PilQ [Tap type IV pili (VF0475) - Adherence (VFC0271)]

VFG045351 (APH\_RS00640\*) P44/Msp2 family outer membrane protein [P44/Msp2 family (VF0520) - Immune modulation (VFC0258)]

VFG044329(gb|WP\_015874964) (irp1) yersiniabactin polyketide synthase HMWP1 [Ybt (VF0564) - Nutritional/Metabolic factor (VF0564)]

VFG038405(gb|WP\_011705727) (AHA\_RS09305) type VI secretion system PAAR protein [T6SS (VF0480) - Effector delivery system (VF0480)]

VFG038436(gb|WP\_016352169) (tapC) type IV fimbrial assembly protein, PilC-like [Tap type IV pili (VF0475) - Adherence (VFC0271)]

VFG001232(gb|NP\_249105) (chpB) probable methylesterase [Type IV pili (VF0082) - Adherence (VFC0001)] [Yersinia (VF0082)]

VFG050912(gb|WP\_000898330.1) (vgrG/tssI) type VI secretion system tip protein VgrG [T6SS (VF1337) - Effector delivery system (VF1337)]

VFG038369(gb|WP\_011705706) (hcp) hemolysin co-regulated protein [T6SS (VF0480) - Effector delivery system (VF0480)]

VFG049073(gb|WP\_015875021) (KP1\_RS17240) DUF4422 domain-containing protein [LPS (VF0561) - Immune modulation (VFC0258)]

VFG038488(gb|WP\_016349432) (tapY1) type IV pilus biogenesis protein [Tap type IV pili (VF0475) - Adherence (VFC0271)]

VFG038780(gb|WP\_011706637) (flgI) flagellar basal body P-ring protein [Polar flagella (VF0473) - Motility (VFC0204)]

VFG000933(gb|WP\_001007140) (entB) isochorismatase [Enterobactin (VF0228) - Nutritional/Metabolic factor (VF0228)]

VFG012162(gb|WP\_011590241) (nanJ) exo-alpha-sialidase [Sialidase (VF0391) - Exoenzyme (VFC0251)] [Clostridium difficile]

VFG051042(gb|WP\_000653195.1) (hcp/tssD) type VI secretion system tube protein Hcp [T6SS (VF1337) - Effector delivery system (VFC0235)] [Yersinia enterocolitica]

VFG000347(gb|WP\_010869038) (hgpC) hemoglobin-binding protein [Hgp (VF0270) - Nutritional/Metabolic factor (VFC0235)] [Yersinia enterocolitica]

VFG000928(gb|WP\_000640938) (fepG) iron-enterobactin ABC transporter permease [Enterobactin (VF0228) - Nutritional/Metabolic factor (VFC0235)] [Escherichia coli]

VFG044325(gb|WP\_002212761) (ybtQ) yersiniabactin ABC transporter ATP-binding/permease protein YbtQ [Yersiniabactin (VF0228) - Nutritional/Metabolic factor (VFC0235)] [Yersinia enterocolitica]

VFG038627(gb|WP\_016350050) (fliF) flagellar MS-ring protein [Polar flagella (VF0473) - Motility (VFC0204)] [Yersinia enterocolitica]

VFG037777(gb|WP\_000867091) (lpsB) glycosyltransferase family 4 protein [LPS (VF0466) - Immune modulation (VFC0235)] [Yersinia enterocolitica]

VFG048808(gb|WP\_004899416) (rfbK1) O9 family phosphomannomutase RfbK1 [Capsule (VF0560) - Immune modulation (VFC0235)] [Yersinia enterocolitica]

VFG000912(gb|WP\_001443207) (focD) F1C fimbrial usher [F1C fimbriae (VF0224) - Adherence (VFC0001)] [Yersinia enterocolitica]

VFG034575(gb|WP\_000715633) (aafB) invasin homolog AafB [AAFs (VF0214) - Adherence (VFC0001)] [Escherichia coli]

VFG001230(gb|NP\_251805) (fimV) a polar peptidoglycan-binding protein involved in type IV pilus assembly [Type IV pili (VF0224) - Adherence (VFC0001)] [Yersinia enterocolitica]

VFG037316(gb|WP\_000744381) (entE) non-ribosomal peptide synthetase adenylate-forming enzyme of acinetobacter [Enterobactin (VF0228) - Nutritional/Metabolic factor (VFC0235)] [Acinetobacter baumannii]

VFG045525(gb|WP\_010947213) (LPG\_RS07435) Dot/Icm type IV secretion system effector [Dot/Icm T4SS secretion system (VF0228) - Nutritional/Metabolic factor (VFC0235)] [Legionella pneumophila]

VFG048327(gb|WP\_004152886) (mrkH) transcriptional activator [Type 3 fimbriae (VF0567) - Biofilm (VFC0271)] [Yersinia enterocolitica]

VFG041340(gb|WP\_010948225) (lem26) Dot/Icm type IV secretion system effector Lem26 [Dot/Icm T4SS secretion system (VF0228) - Nutritional/Metabolic factor (VFC0235)] [Legionella pneumophila]

VFG000925(gb|WP\_000140634) (fepC) ferrienterobactin ABC transporter ATPase [Enterobactin (VF0228) - Nutritional/Metabolic factor (VFC0235)] [Escherichia coli]

VFG038707(gb|WP\_016350059) (cheA-2) chemotaxis protein CheA [Polar flagella (VF0473) - Motility (VFC0204)] [Yersinia enterocolitica]

VFG044331(gb|WP\_015874966) (ybtT) type II thioesterase YbtT [Ybt (VF0564) - Nutritional/Metabolic factor (VFC0235)] [Yersinia enterocolitica]

VFG048459(gb|WP\_004147525) (entS) enterobactin exporter EntS [Ent (VF0562) - Nutritional/Metabolic factor (VFC0235)] [Escherichia coli]

VFG000429(gb|WP\_010989299) (tviD) Vi polysaccharide biosynthesis protein TviD [Vi antigen (VF0101) - Immune modulation (VFC0235)] [Yersinia enterocolitica]

VFG002173(gb|WP\_010785625) (asa1) aggregation substance Asa1 [AS (VF0352) - Adherence (VFC0001)] [Enterobacteriaceae]

VFG050162(gb|WP\_001161829) (kpsS) Capsule polysaccharide export protein [K1 capsule (VF0239) - Invasion (VFC0235)] [Klebsiella pneumoniae]

VFG043623(gb|WP\_002916122) (mrkF) type 3 fimbrial minor pilin subunit MrkF [Type 3 fimbriae (VF0567) - Biofilm (VFC0271)] [Yersinia enterocolitica]

VFG034815(gb|WP\_000671689) (espR1) Type III secretion system effector espR1 [TTSS secreted effectors (VF0191) - Effector delivery system (VFC0235)] [Yersinia enterocolitica]

VFG048547(gb|WP\_004213617) (iroN) salmochelin receptor IroN [Sal (VF0563) - Nutritional/Metabolic factor (VFC0235)] [Yersinia enterocolitica]

VFG044172(gb|WP\_000622316) (chuV) ATP-binding hydrophilic protein ChuV [Chu (VF0227) - Nutritional/Metabolic factor (VFC0235)] [Yersinia enterocolitica]

VFG001271(gb|WP\_010929998) (cyaE) cyclolysin secretion protein [Cya (VF0028) - Exotoxin (VFC0235)] [Bordetella pertussis]

VFG000801(gb|WP\_001273445) (sepL) Type III secretion system secretion gatekeeper SepL [TTSS (VF0191) - Effector delivery system (VFC0235)] [Yersinia enterocolitica]

VFG048429(gb|WP\_004183353) (entE) enterobactin synthase subunit E [Ent (VF0562) - Nutritional/Metabolic factor (VFC0235)] [Escherichia coli]

VFG000942(gb|AAK16475) (draA) cytoplasmic protein DraA [Dr adhesins (VF0223) - Adherence (VFC0001)] [Yersinia enterocolitica]

VFG038611(gb|WP\_016349153) (mshI1) MSHA (mannose-sensitive hemagglutinin) pili biogenesis protein MshI1 [Pili (VF0223) - Adherence (VFC0001)] [Yersinia enterocolitica]

VFG049155(gb|WP\_000829570) (clbI) colibactin polyketide synthase ClbI [Colibactin (VF0573) - Exotoxin (VFC0235)] [Yersinia enterocolitica]

VFG041018(gb|NP\_250351) (PA1660) hypothetical protein [HSI-2 (VF0943) - Effector delivery system (VFC0235)] [Yersinia enterocolitica]

VFG038836(gb|WP\_011707085) (pomA2) chemotaxis protein PomA [Polar flagella (VF0473) - Motility (VFC0204)] [Yersinia enterocolitica]

VFG041010(gb|NP\_248760) (tagQ) type VI secretion associated protein TagQ, outer membrane lipoprotein [HSI-2 (VF0943) - Effector delivery system (VFC0235)] [Yersinia enterocolitica]

VFG038768(gb|WP\_016351318) (flgL) flagellar hook-associated protein FlgL [Polar flagella (VF0473) - Motility (VFC0204)] [Yersinia enterocolitica]

VFG012337(gb|WP\_001370792) (sfaF) S fimbriae outer membrane usher SfaF [S fimbriae (VF0222) - Adherence (VFC0001)] [Yersinia enterocolitica]

VFG045788(gb|WP\_001189322) (cgsG) curli production assembly/transport protein CsgG [Curli fibers (VF1138) - Biofilm (VFC0271)] [Yersinia enterocolitica]

VFG000905(gb|WP\_001546261) (hlyC) Hemolysin C [-Hemolysin (VF0225) - Exotoxin (VFC0235)] [Escherichia coli]

VFG000218(gb|NP\_250414) (pscJ) type III secretion system inner MS ring protein [TTSS (VF0083) - Effector delivery system (VFC0235)] [Yersinia enterocolitica]

VFG049904 (clpV/tssH) Type VI secretion system ATPase ClpV/TssH [T6SS (VF0579) - Effector delivery system (VFC0235)] [Yersinia enterocolitica]

VFG037586(gb|WP\_000876480) (csuB) Csu pilus subunit CsuB [Csu fimbriae (VF0461) - Biofilm (VFC0271)] [Yersinia enterocolitica]

VFG038760(gb|WP\_016351312) (flrB) two-component sensor kinase [Polar flagella (VF0473) - Motility (VFC0204)] [Yersinia enterocolitica]

VFG002536(gb|WP\_004530401) (fliD) flagellar capping protein FliD [Flagella (VF0430) - Motility (VFC0204)] [Yersinia enterocolitica]

VFG034780(gb|WP\_001132163) (espM1) Type III secretion system effector EspM1, Rho guanine exchange factor [Type III secretion system (VF0191) - Effector delivery system (VFC0235)] [Yersinia enterocolitica]

VFG000930(gb|WP\_000077767) (entF) enterobactin synthase multienzyme complex component, ATP-dependent [Enterobactin (VF0228) - Nutritional/Metabolic factor (VFC0235)] [Escherichia coli]

VFG000130(gb|NP\_252238) (algI) alginate o-acetyltransferase AlgI [Alginate (VF0091) - Biofilm (VFC0271)] [

VFG038444(gb|WP\_075384315) (tapM) type IV pilus assembly protein PilM [Tap type IV pili (VF0475) - Adhe

VFG000122(gb|NP\_252230) (algD) GDP-mannose 6-dehydrogenase AlgD [Alginate (VF0091) - Biofilm (VFC0

VFG034721(gb|WP\_000556298) (ibeC) phosphoethanolamine transferase CptA [Ibes (VF0237) - Invasion (VFC

VFG038517(gb|WP\_016350156) (flpJ) Flp pilus pseudopilin [Flp type IV pili (VF0476) - Adherence (VFC0001)

VFG037428(gb|WP\_000939834) (basB) non-ribosomal peptide synthetase with condensation and peptidyl carrier

VFG045349(gb|WP\_000092542) (fdeC) adhesin FdeC [FdeC (VF0506) - Adherence (VFC0001)] [Escherichia co

VFG038590(gb|WP\_043118275) (mshE) ATPase protein MshE, GspE-like [MSHA type IV pili (VF0477) - Adh

VFG048277(gb|WP\_009308599) (fimD) outer membrane usher protein [Type I fimbriae (VF0566) - Adherence

VFG034756 (espL1) Type III secretion system effector espL1 [TTSS secreted effectors (VF1111) - Effector deliv

VFG038711(gb|WP\_016350060) (cheB-2) chemotaxis-specific methyltransferase [Polar flagella (VF0473) - Motility

VFG038639(gb|WP\_011705275) (fliI) flagellum-specific ATP synthase [Polar flagella (VF0473) - Motility (VFC

VFG049906 (tssK) Type VI secretion system protein TssK [T6SS (VF0579) - Effector delivery system (VFC008

VFG000929(gb|WP\_001375021) (entD) phosphopantetheinyl transferase component of enterobactin synthase mu

VFG000875(gb|WP\_000066579) (fimC) Chaperone protein fimC precursor [Type 1 fimbriae (VF0221) - Adherence

VFG051000(gb|WP\_000568832.1) (tssF) type VI secretion system baseplate subunit TssF [T6SS (VF1337) - Eff

VFG038293(gb|WP\_016349340) (exeI) general secretion pathway protein I [Exe T2SS (VF0478) - Effector deliv

VFG000883(gb|WP\_001239363) (papH) P pilus termination subunit PapH [P fimbriae (VF0220) - Adherence (V

VFG015515(gb|NP\_252903) (phzE1) phenazine biosynthesis protein PhzE [Pyocyanin (VF0100) - Nutritional/M

VFG038285(gb|WP\_005308483) (exeG) general secretion pathway protein G [Exe T2SS (VF0478) - Effector del

VFG000362(gb|WP\_002212777) (irp1) yersiniabactin biosynthetic protein Irp1 [Yersiniabactin (VF0136) - Nutri

VFG044025(gb|WP\_012669495) (C2II) C2 toxin (component-II) [C2 toxin (VF0384) - Exotoxin (VFC0235)] [C

VFG000926(gb|WP\_001443194) (fepD) ferrienterobactin ABC transporter permease [Enterobactin (VF0228) - N

VFG038792(gb|WP\_011706640) (flgF) flagellar basal-body rod protein FlgF [Polar flagella (VF0473) - Motility

VFG046118(gb|WP\_011205945) (mhp107) P97 paralog, surface adhesin [P97/P102 paralog family (VF0426) - A

VFG049900 (tssM) Type VI secretion system protein TssM [T6SS (VF0579) - Effector delivery system (VFC008

VFG050163(gb|WP\_000197083) (neuE) polysialic acid biosynthesis protein [K1 capsule (VF0239) - Invasion (V

VFG048317(gb|WP\_014906959) (fimK) transcriptional regulator [Type I fimbriae (VF0566) - Adherence (VFC0

VFG043625(gb|WP\_000813718) (mrkC) fimbrial biogenesis outer membrane usher protein mrkC precursor [Typ

VFG002420(gb|WP\_000645781) (adsA) Adenosine synthase A [AdsA (VF0422) - Immune modulation (VFC023

VFG001265(gb|NP\_250145) (fleN) flagellar synthesis regulator FleN [Flagella (VF0273) - Motility (VFC0204)]

VFG012513(gb|WP\_001221122) (iroB) glucosyltransferase IroB [Salmochelin siderophore (VF0230) - Nutrition

VFG002437(gb|WP\_011325557) (boaB) autotransporter protein [BoaB (VF0435) - Adherence (VFC0001)] [Burl

VFG048419(gb|WP\_004210873) (entB) 2,3-dihydro-2,3-dihydroxybenzoate synthetase, isochroismatase [Ent (V

VFG034648(gb|WP\_001245988) (cfaD/cfaE) minor pilin and initiator [Adhesive fimbriae (VF0213) - Adherence

VFG034849(gb|WP\_000129338) (espX1) Type III secretion system effector EspX1 [TTSS secreted effectors (VF

VFG001359(gb|WP\_000733059) (psaA) manganese ABC transporter, manganese-binding adhesion lipoprotein [Psa

VFG049051(gb|WP\_014907239) (KP1\_RS17230) glycosyltransferase [LPS (VF0561) - Immune modulation (VF

VFG001254(gb|NP\_249795) (fliI) flagellum-specific ATP synthase FliI [Flagella (VF0273) - Motility (VFC0204

VFG000879(gb|WP\_000832235) (fimH) FimH protein precursor [Type 1 fimbriae (VF0221) - Adherence (VFC0

VFG048985(gb|WP\_014907219) (KP1\_RS17355) phosphatase PAP2 family protein [Capsule (VF0560) - Immur

VFG044044(gb|AAB29385) (trhX) TDH-related hemolysin [TRH (VF0518) - Exotoxin (VFC0235)] [Vibrio para

VFG047149(gb|WP\_003029668) (wbtF) NAD dependent epimerase [LPS (VF0542) - Immune modulation (VFC

VFG048755(gb|WP\_049127998) (icmF/tssM) type VI secretion protein TssM [T6SS (VF0569) - Effector deliver

VFG000434(gb|NP\_490509) (pefC) plasmid-encoded fimbriae usher protein PefC [Pef (VF0104) - Adherence (V

VFG002370(gb|WP\_011816870) (YE\_RS15455) EpsG family protein [O-antigen (VF0392) - Immune modulatio





VFG034612(gb|WP\_000225871) (*cfaA*) colonisation factor antigen a, chaperone [Adhesive fimbriae (VF0213) -  
VFG049912 (*tssC*) Type VI secretion system protein TssC [T6SS (VF0579) - Effector delivery system (VFC0080)  
VFG000917(gb|WP\_000089583) (*chuA*) Outer membrane heme/hemoglobin receptor ChuA [Chu (VF0227) - Nu  
VFG038328(gb|WP\_005320795) (*ascD*) Type III secretion system OM ring protein AscD [T3SS (VF0479) - Eff  
VFG000343(gb|WP\_164927854) (*hitB*) iron ABC transporter permease [HitABC (VF0268) - Nutritional/Metabo  
VFG049084(gb|WP\_004175264) (*rfbB*) O-antigen export ABC transporter ATP-binding protein RfbB [LPS (VF  
VFG038301(gb|WP\_016349342) (*exeK*) general secretion pathway protein K [Exe T2SS (VF0478) - Effector del  
VFG038679(gb|WP\_016350055) (*flhB*) flagellar biosynthetic protein FlhB [Polar flagella (VF0473) - Motility (V  
VFG038587(gb|WP\_016349160) (*mshG*) MSHA (mannose-sensitive hemagglutinin) pili biogenesis protein Msh  
VFG000932(gb|WP\_000026784) (*entE*) 2,3-dihydroxybenzoate-AMP ligase component of enterobactin synthase  
VFG000944(gb|AAK16477) (*draC*) usher protein DraC [Dr adhesins (VF0223) - Adherence (VFC0001)] [Escher  
VFG001825(gb|NP\_217648) (*devS*) two component sensor histidine kinase DevS [DevRS (VF0317) - Regulation  
VFG049018(gb|WP\_002913007) (*rbcB*) transcriptional regulator RcsB [RcsAB (VF0571) - Regulation (VFC030  
VFG038756(gb|WP\_011706626) (*flrC*) transcriptional activator [Polar flagella (VF0473) - Motility (VFC0204)]  
VFG001214(gb|NP\_253237) (*pilR*) two-component response regulator PilR [Type IV pili (VF0082) - Adherence  
VFG002052(gb|WP\_000820136) (*gspI*) general secretion pathway protein I [T2SS (VF0333) - Effector delivery s  
VFG038509(gb|WP\_016350158) (*flpL*) Flp pilus pseudopilin [Flp type IV pili (VF0476) - Adherence (VFC0001  
VFG049162(gb|WP\_002430641) (*clbP*) precolibactin peptidase ClbP [Colibactin (VF0573) - Exotoxin (VFC023  
VFG038561(gb|WP\_016349168) (*mshQ*) MSHA (mannose-sensitive hemagglutinin) pili biogenesis protein Msh  
VFG048600(gb|WP\_004213920) (*iucA*) aerobactin Synthetase IucA [Aerobactin (VF0565) - Nutritional/Metabol  
VFG038429(gb|WP\_016352167) (*tapA*) type IV pilus pilin subunit, pilA-like [Tap type IV pili (VF0475) - Adher  
VFG037807(gb|WP\_000013434) (*lpxB*) lipid-A-disaccharide synthase [LPS (VF0466) - Immune modulation (VF  
VFG049144(gb|WP\_002892069) (*acrB*) acriflavine resistance protein B [AcrAB (VF0568) - Antimicrobial activi  
VFG038402(gb|WP\_011705725) (*vasK/icmF*) Type VI secretion system protein [T6SS (VF0480) - Effector deliv  
VFG049916(gb|WP\_000103365) (*vgrG/tssI*) type VI secretion system effector VgrG [T6SS (VF0579) - Effector  
VFG002492(gb|WP\_004184995) (*fliN*) flagellar motor switch protein FliN [Flagella (VF0430) - Motility (VFC0  
VFG038882(gb|WP\_005314247) (*maf-5*) modification accessory factor [Lateral flagella (VF0474) - Motility (VF  
VFG003977(gb|NP\_461229) (*sseL*) type III secretion system effector SseL, deubiquitinase [TTSS-2 secreted effe  
VFG002409(gb|WP\_000549274) (*essC*) type VII secretion system protein EssC, FtsK/SpoIIIE family ATPase [T  
VFG038878(gb|WP\_005314254) (*flgI*) flagellar basal body P-ring protein [Lateral flagella (VF0474) - Motility (V  
VFG045793(gb|WP\_000771429) (*csgA*) curlin major subunit CsgA [Curli fibers (VF1138) - Adherence (VFC00  
VFG001225(gb|NP\_249099) (*pilG*) twitching motility protein PilG [Type IV pili (VF0082) - Adherence (VFC00  
VFG022146(gb|NP\_214805) (*mycP3*) Type VII secretion system membrane-anchored mycosin MycP3 [ESX-3 (V  
VFG038553(gb|WP\_016350147) (*flpA*) prepilin peptidase [Flp type IV pili (VF0476) - Adherence (VFC0001)] [A  
VFG048771(gb|WP\_004190505) (*tssF*) type VI secretion system baseplate subunit TssF [T6SS (VF0569) - Effec  
VFG044024(gb|ACA60977) (ACA60977) alpha-toxin [Alpha-toxin (septicum) (VF0416) - Exotoxin (VFC0235)  
VFG016776(gb|WP\_005767781) (*fliI*) flagellar specific ATP synthase [Flagella (VF0373) - Motility (VFC0204)  
VFG002074(gb|NP\_248778) (*hsiG1/tssF*) type VI secretion system hcp secretion island protein HsiG1 [HSI-I (V  
VFG038731(gb|WP\_016350347) (*flaA*) flagellin [Polar flagella (VF0473) - Motility (VFC0204)] [Aeromonas hy  
VFG038413(gb|WP\_043118350) (*fimC*) outer membrane usher protein [Type I pili (VF0486) - Adherence (VFC  
VFG038468(gb|WP\_016351972) (*tapU*) twitching ATPase [Tap type IV pili (VF0475) - Adherence (VFC0001)]  
VFG038385(gb|WP\_011705716) (*atsI*) Type VI secretion system protein [T6SS (VF0480) - Effector delivery sys  
VFG043504(gb|WP\_000671444) (*pavB/pfbB*) cell wall surface anchor family protein, Plasminogen- and Fibrone  
VFG000359(gb|WP\_001088826) (*ybtE*) yersiniabactin siderophore biosynthetic protein [Yersiniabactin (VF0136  
VFG046465(gb|WP\_003028672) (*tufA*) elongation factor Tu [EF-Tu (VF0460) - Adherence (VFC0001)] [Franci  
VFG049157(gb|WP\_014907259) (*clbK*) colibactin hybrid non-ribosomal peptide synthetase/type I polyketide syn

VFG015551(gb|NP\_248741) (phzH) phenazine-modifying enzyme [Pyocyanin (VF0100) - Nutritional/Metabolic  
VFG048697(gb|WP\_015874721) (clpV/tssH) type VI secretion system ATPase TssH [T6SS (VF0569) - Effector  
VFG003561(gb|WP\_005173823) (yst1E) type II secretion system ATPase GspE [Yst1 T2SS (VF0635) - Effector  
VFG000884(gb|WP\_000654937) (papC) usher protein PapC [P fimbriae (VF0220) - Adherence (VFC0001)] [Es  
VFG047529(gb|WP\_003029409) (bioA) adenosylmethionine-8-amino-7-oxononanoate aminotransferase [Biotin  
VFG000876(gb|WP\_000120946) (fimD) Outer membrane usher protein fimD precursor [Type 1 fimbriae (VF022  
VFG049911(gb|WP\_000393837) (tssF) Type VI secretion system protein TssF [T6SS (VF0579) - Effector delive  
VFG044332(gb|WP\_015874967) (ybtE) yersiniabactin biosynthesis salycil-AMP ligase YbtE [Ybt (VF0564) - N  
VFG038409(gb|WP\_011704492) (fimA) fimbrial protein [Type I pili (VF0486) - Adherence (VFC0001)] [Aerom  
VFG002517(gb|WP\_004203463) (flgK) flagellar hook-associated protein 1 FlgK [Flagella (VF0430) - Motility (V  
VFG002120(gb|WP\_010948516) (sidH) Dot/Icm type IV secretion system effector SidH [Dot/Icm T4SS secreted  
VFG002049(gb|WP\_001173470) (gspF) general secretion pathway protein F [T2SS (VF0333) - Effector delivery  
VFG001381(gb|YP\_177728) (icl) Isocitrate lyase Icl (isocitrase) (isocitratase) [Isocitrate lyase (VF0253) - Others  
VFG001252(gb|NP\_249793) (fliG) flagellar motor switch protein G [Flagella (VF0273) - Motility (VFC0204)] [I  
VFG002047(gb|WP\_000498818) (gspD) general secretion pathway protein D [T2SS (VF0333) - Effector delivery  
VFG049161(gb|WP\_001029878) (clbO) colibactin polyketide synthase ClbO [Colibactin (VF0573) - Exotoxin (V  
VFG000159(gb|NP\_251076) (pvdA) L-ornithine N5-oxygenase PvdA [Pyoverdine (VF0094) - Nutritional/Metab  
VFG001374(gb|WP\_000077424) (cps4J) capsular polysaccharide biosynthesis protein Cps4J [Capsule (VF0144)  
VFG037822(gb|WP\_000240700) (lpxC) UDP-3-O-acyl-N-acetylglucosamine deacetylase [LPS (VF0466) - Immu  
VFG002166(gb|WP\_010714416) (ace) collagen adhesin protein [Ace (VF0355) - Adherence (VFC0001)] [Enter  
VFG050115(gb|WP\_002081542) (cesA) Cereulide synthetase A, CesA [Cereulide (VF0583) - Exotoxin (VFC023  
VFG012615(gb|WP\_000020049) (chuX) putative heme-binding protein ChuX [Chu (VF0234) - Nutritional/Meta  
VFG038695(gb|WP\_017409955) (fliA) flagellar biosynthesis sigma factor [Polar flagella (VF0473) - Motility (V  
VFG048819(gb|WP\_014907234) (KP1\_RS17280) mannose-1-phosphate guanylyltransferase/mannose-6-phosph  
VFG043642(gb|WP\_011205946) (MHP\_RS00555) P110/LppT family adhesin N-terminal domain [P97/P102 par  
VFG049122(gb|WP\_012737539) (allC) allantoate amidohydrolase [Allantion utilization (VF0572) - Nutritional/M  
VFG038667(gb|WP\_016350054) (fliP) flagellar biosynthesis protein FliP [Polar flagella (VF0473) - Motility (VF  
VFG000859(gb|CBG37421) (set1A) enterotoxin subunit Set1A [ShET1 (VF0219) - Exotoxin (VFC0235)] [Esche  
VFG049905(gb|WP\_000343289) (tssL) Type VI secretion system protein TssL [T6SS (VF0579) - Effector delive  
VFG038647(gb|WP\_016350053) (fliK) flagellar hook-length control protein FliK [Polar flagella (VF0473) - Mot  
VFG038374(gb|WP\_011705709) (atsB) Type VI secretion system protein [T6SS (VF0480) - Effector delivery sy  
VFG000326(gb|WP\_105163169) (licA) choline kinase [LOS (VF0044) - Immune modulation (VFC0258)] [Haem  
VFG048508(gb|WP\_012737618) (fes) enterobactin/ferric enterobactin esterase [Ent (VF0562) - Nutritional/Meta  
VFG044327(gb|WP\_000140406) (ybtA) yersiniabactin transcriptional regulator YbtA [Ybt (VF0564) - Nutritio  
VFG048620(gb|WP\_014907843) (iutA) ferric aerobactin receptor IutA [Aerobactin (VF0565) - Nutritional/Metal  
VFG048409(gb|WP\_086074289) (entA) 2,3-dihydroxybenzoate-2,3-dehydrogenase [Ent (VF0562) - Nutritional/  
VFG048830(gb|WP\_014907233) (gndA) NADP-dependent phosphogluconate dehydrogenase [Capsule (VF0560)  
VFG038119(gb|WP\_000686134) (ACICU\_RS00485) nucleotide sugar dehydrogenase [Capsule (VF0465) - Imm  
VFG043017(gb|NP\_252038) (PA3348) chemotaxis protein methyltransferase [Flagella (VF0273) - Motility (VFC  
VFG048488(gb|WP\_002893737) (fepC) iron-enterobactin transporter ATP-binding protein [Ent (VF0562) - Nutr  
VFG049007(gb|WP\_002911561) (rcaA) transcriptional activator for ctr capsule biosynthesis [RcsAB (VF0571) -  
VFG012591(gb|WP\_001017167) (chuS) heme oxygenase ChuS [Chu (VF0234) - Nutritional/Metabolic factor (V  
VFG012505(gb|WP\_000933673) (iroD) esterase [Salmochelinsiderophore (VF0230) - Nutritional/Metabolic fac  
VFG049826(gb|WP\_000142058) (esaG) TIGR01741 family protein [Type VII secretion system (VF0403) - Effe  
VFG038615(gb|WP\_016349152) (mshI) MSHA (mannose-sensitive hemagglutinin) pili biogenesis protein MshI,  
VFG000902(gb|WP\_001034089) (sat) Acreted auto transpoter toxin [Sat (VF0231) - Effector delivery system (V

VFG001443(gb|AAF37887) (*ompA*) outer membrane protein A [OmpA (VF0236) - Invasion (VFC0083)] [Esche

VFG049903(gb|WP\_001240533) (*tssA*) Type VI secretion system protein TssA [T6SS (VF0579) - Effector deliv

VFG002066(gb|NP\_248770) (*lip1*) lipoprotein [HSI-I (VF0334) - Effector delivery system (VFC0086)] [Pseudor

VFG000927(gb|WP\_000096764) (*fepE*) LPS O-antigen length regulator [Enterobactin (VF0228) - Nutritional/M

VFG041043(gb|NP\_251061) (PA2371) ClpA/B-type protease [HSI-3 (VF0944) - Effector delivery system (VFC

VFG038631(gb|WP\_011705273) (*fliG*) flagellar motor switch protein G [Polar flagella (VF0473) - Motility (VFC

VFG038889(gb|WP\_005314215) (*lafT*) LafT, flagella motor stator protein [Lateral flagella (VF0474) - Motility (V

VFG002328(gb|WP\_011816597) (*fliF*) flagellar M-ring protein FliF [Flagella (VF0394) - Motility (VFC0204)] [

VFG048518(gb|WP\_012737617) (*fepA*) outer membrane receptor FepA [Ent (VF0562) - Nutritional/Metabolic f

VFG050165(gb|WP\_001259305) (*neuA*) N-acylneuraminate cytidyltransferase [K1 capsule (VF0239) - Invasio

VFG038393(gb|WP\_010634228) (*dotU*) Type VI secretion system protein DotU [T6SS (VF0480) - Effector deliv

VFG038349(gb|WP\_005320751) (*ascO*) Type III secretion system protein AscO [T3SS (VF0479) - Effector deliv

VFG000140(gb|NP\_253696) (*waaP*) UDP-glucose:(heptosyl) LPS alpha 1,3-glucosyltransferase WaaG [LPS (VF

VFG037246(gb|WP\_001032906) (*basH*) non-ribosomal peptide biosynthesis thioesterase BasH [Acinetobactin (V

VFG045474(gb|AAM75251) (*cylM*) CylM; cytolysin subunit modifier [Cytolysin (VF0356) - Exotoxin (VFC023

VFG050400(gb|WP\_000347039.1) (*pilU*) PilT/PilU family type 4a pilus ATPase [TFP (VF1334) - Adherence (V

VFG050685(gb|WP\_001160337.1) (*pilS*) PAS domain-containing sensor histidine kinase [TFP (VF1334) - Adhe

VFG001223(gb|NP\_249086) (*pilT*) twitching motility protein PilT [Type IV pili (VF0082) - Adherence (VFC00

VFG002497(gb|WP\_011204776) (*fliK*) flagellar hook-length control protein FliK [Flagella (VF0430) - Motility (V

VFG051244(gb|WP\_004683766.1) (BPE043) type IV secretion system effector [T4SS secreted effectors (VF069

VFG038683(gb|WP\_016350056) (*flhA*) flagellar biosynthesis protein FlhA [Polar flagella (VF0473) - Motility (V

VFG049095(gb|WP\_002912373) (*rfaA*) O-antigen export ABC transporter permease RfaA [LPS (VF0561) - Imr

VFG016472(gb|WP\_011206327) (*p216*) protein P216, cilium adhesin p97 paralog [P97/P102 paralog family (VF

VFG012160(gb|WP\_011590331) (*nanI*) exo-alpha-sialidase [Sialidase (VF0391) - Exoenzyme (VFC0251)] [Clo

VFG048643(gb|WP\_014907727) (*vipB/tssC*) type VI secretion system contractile sheath large subunit VipB [T6

VFG002277(gb|WP\_011009663) (*nagH*) hyaluronidase [Mu-toxin (VF0389) - Exoenzyme (VFC0251)] [Clostrid

VFG002274(gb|WP\_011009584) (*plc*) phospholipase C [Alpha-toxin (CpPLC) (VF0378) - Exotoxin (VFC0235)

VFG043627(gb|WP\_000756959) (*mrkA*) type 3 fimbrial major pilin subunit MrkA [Type 3 fimbriae (VF0567) -

VFG001270(gb|WP\_010929997) (*cyaD*) cyclolysin secretion protein [Cya (VF0028) - Exotoxin (VFC0235)] [Bo

VFG044324(gb|WP\_032447693) (*ybtX*) yersiniabactin-associated zinc MFS transporter YbtX [Ybt (VF0564) - N

VFG002417(gb|WP\_001301550) (*yagV/ecpE*) E. coli common pilus chaperone EcpE [ECP (VF0404) - Adherenc

VFG050157(gb|WP\_001331698) (*kpsF*) Polysialic acid capsule expression protein [K1 capsule (VF0239) - Invas

VFG048287(gb|WP\_014906962) (*fimF*) type 1 fimbrial minor component [Type I fimbriae (VF0566) - Adherenc

VFG002060(gb|NP\_248764) (*ppkA*) serine/threonine protein kinase PpkA [HSI-I (VF0334) - Effector delivery sy

VFG002452(gb|WP\_004525318) (*bsaZ*) YscU homolog, component of the inner membrane ring [Bsa T3SS (VFC

VFG050670(gb|WP\_000505931.1) (*pilJ*) methyl-accepting chemotaxis protein [TFP (VF1334) - Adherence (VFC

VFG038772(gb|WP\_016351319) (*flgK*) flagellar hook-associated protein FlgK [Polar flagella (VF0473) - Motilit

VFG000820(gb|WP\_000087467) (*cesD*) chaperone for EspB and EspD [TTSS (VF0191) - Effector delivery syste

VFG038297(gb|WP\_016349341) (*exeJ*) general secretion pathway protein J [Exe T2SS (VF0478) - Effector deliv

VFG038753(gb|WP\_024944879) (*motY*) sodium-type flagellar protein MotY [Polar flagella (VF0473) - Motility

VFG038913 (*rtxA*) multifunctional autoprocessing repeats-in-toxins (MARTX) toxin [RtxA (VF0482) - Exotoxin

VFG034901(gb|WP\_000868321) (*espY2*) Type III secretion system effector EspY2 [TTSS secreted effectors (VF

VFG000871(gb|WP\_000790574) (*fimB*) Type 1 fimbriae Regulatory protein fimB [Type 1 fimbriae (VF0221) - A

VFG000182(gb|NP\_251793) (*xcpR*) general secretion pathway protein E [Xcp secretion system (VF0084) - Effec

VFG049040(gb|WP\_074160401) (KP1\_RS17225) glycosyltransferase family 4 protein [LPS (VF0561) - Immune

VFG002415(gb|WP\_001131063) (*yagX/ecpC*) E. coli common pilus usher EcpC [ECP (VF0404) - Adherence (V

VFG049163(gb|WP\_000065646) (clbQ) colibactin biosynthesis thioesterase ClbQ [Colibactin (VF0573) - Exotoxin (VFC0258)] [Haemophilus influenzae (VF0124) - Adherence (VFC0001)]

VFG002414(gb|WP\_000730972) (yagZ/ecpA) E. coli common pilus structural subunit EcpA [ECP (VF0404) - Adherence (VFC0001)]

VFG000687(gb|AAP42180) (bexD') BexD' [Capsule (VF0043) - Immune modulation (VFC0258)] [Haemophilus influenzae (VF0124) - Adherence (VFC0001)]

VFG038655(gb|WP\_011705279) (fliM) flagellar motor switch protein FliM [Polar flagella (VF0473) - Motility (VFC0204)]

VFG002280(gb|WP\_011010361) (nagK) hyaluronidase [Mu-toxin (VF0389) - Exoenzyme (VFC0251)] [Clostridium difficile (VF0124) - Adherence (VFC0001)]

VFG000669(gb|NP\_706257) (gtrA) bactoprenol-linked glucose translocase/flippase [LPS (VF0124) - Immune modulation (VFC0258)]

VFG016058(gb|NP\_251114) (pvdL) peptide synthase PvdL [Pyoverdine (VF0094) - Nutritional/Metabolic factor (VFC0251)]

VFG041042(gb|NP\_251060) (PA2370) hypothetical protein [HSI-3 (VF0944) - Effector delivery system (VFC0001)]

VFG001930(gb|YP\_002345095) (flgE2) flagellar hook protein [Flagella (VF0114) - Motility (VFC0204)] [Campylobacter jejuni (VF0114) - Motility (VFC0204)]

VFG002412(gb|WP\_000716386) (yagY/ecpB) E. coli common pilus chaperone EcpB [ECP (VF0404) - Adherence (VFC0001)]

VFG045818(gb|WP\_001528154) (tsh) temperature-sensitive protein Tsh [Tsh (VF0233) - Effector delivery system (VFC0001)]

VFG034576(gb|WP\_049794100) (aafC) aggregative adherence fimbria II usher protein AafC [AAFs (VF0214) - Adherence (VFC0001)]

VFG000423(gb|WP\_000052242) (vexE) Vi polysaccharide export protein VexE [Vi antigen (VF0101) - Immune modulation (VFC0258)]

VFG000088(gb|WP\_000591844) (tcpI) negative regulator of the major pilin TcpA [TCP (VF0126) - Adherence (VFC0001)]

VFG039410(gb|NP\_819986) (cem3) Coxiella Dot/Icm type IVB secretion system translocated effector [T4SS secreted effectors (VF0126) - Adherence (VFC0001)]

VFG045791(gb|WP\_000481500) (cgsD) transcriptional regulator CsgD [Curli fibers (VF1138) - Adherence (VFC0001)]

VFG002349(gb|WP\_005168797) (flgD) flagellar basal-body rod modification protein FlgD [Flagella (VF0394) - Motility (VFC0204)]

VFG002538(gb|WP\_004184923) (pmlR/bspR1) N-acylhomoserine lactone dependent regulatory protein [Quorum sensing (VF0126) - Adherence (VFC0001)]

VFG051113(gb|WP\_080515433.1) (bigA) adhesin with a bacterial immunoglobulin-like domain [BigA (VF1344) - Adherence (VFC0001)]

VFG041020(gb|NP\_250353) (PA1662) ClpA/B-type protease [HSI-2 (VF0943) - Effector delivery system (VFC0001)]

VFG034772(gb|WP\_000627910) (espL4) Type III secretion system effector EspL4 [TTSS secreted effectors (VF0126) - Adherence (VFC0001)]

VFG038874(gb|WP\_005314263) (flgE) flagellar hook protein FlgE [Lateral flagella (VF0474) - Motility (VFC0204)]

VFG050158(gb|WP\_000905916) (kpsE) Capsule polysaccharide export inner-membrane protein [K1 capsule (VF0126) - Adherence (VFC0001)]

VFG050386(gb|WP\_000355489.1) (pilT) type IV pilus twitching motility protein PilT [TFP (VF1334) - Adherence (VFC0001)]

VFG041102(gb|NP\_459276) (STM0278) putative periplasmic protein [SCI (Salmonella centrisome island) (VF0126) - Adherence (VFC0001)]

VFG049156(gb|WP\_077265119) (clbJ) colibactin non-ribosomal peptide synthetase ClbJ [Colibactin (VF0573) - Exotoxin (VFC0258)]

VFG037762(gb|WP\_000078878) (lpxL) lauroyl acyltransferase [LPS (VF0466) - Immune modulation (VFC0258)]

VFG000427(gb|WP\_000720235) (vexA) Vi polysaccharide export protein VexA [Vi antigen (VF0101) - Immune modulation (VFC0258)]

VFG002416(gb|WP\_001265657) (yagW/ecpD) polymerized tip adhesin of ECP fibers [ECP (VF0404) - Adherence (VFC0001)]

VFG034817(gb|WP\_000671691) (espR1) Type III secretion system effector espR1 [TTSS secreted effectors (VF0126) - Adherence (VFC0001)]

VFG038812(gb|WP\_011706645) (cheR-3) chemotaxis protein CheR [Polar flagella (VF0473) - Motility (VFC0204)]

VFG049899(gb|WP\_001087735) (tssA) Type VI secretion system protein TssA [T6SS (VF0579) - Effector delivery system (VFC0001)]

VFG000064(gb|WP\_010930831) (bcrD) Type III secretion system LcrD homolog protein BcrD [TTSS (VF0035) - Adherence (VFC0001)]

VFG041027(gb|NP\_250360) (PA1669) hypothetical protein [HSI-2 (VF0943) - Effector delivery system (VFC0001)]

VFG040868(gb|WP\_000404139) (esxL) type VII secretion system protein EsxL [T7SS (VF0581) - Effector delivery system (VFC0001)]

VFG049898(gb|WP\_001284199) (hcp1/tssD1) type VI secretion system protein, Hcp family [T6SS (VF0579) - Effector delivery system (VFC0001)]

VFG038273(gb|WP\_016349335) (exeD) general secretion pathway protein D [Exe T2SS (VF0478) - Effector delivery system (VFC0001)]

VFG011626(gb|WP\_002965156) (bvrR) response regulator transcription factor [BvrR-BvrS (VF0368) - Regulation (VFC0251)]

VFG031564(gb|YP\_177826) (PE\_PGRS30) PE-PGRS family protein PE\_PGRS30 [PE/PE-PGRS (VF0316) - Immune modulation (VFC0258)]

VFG038329(gb|WP\_011899438) (ascC) Type III secretion system OM ring protein AscC [T3SS (VF0479) - Effector delivery system (VFC0001)]

VFG034928(gb|WP\_001239082) (lifA/efa1) lymphostatin Efa1/LifA [Lymphostatin/LifA (VF0175) - Effector delivery system (VFC0001)]

VFG038383(gb|WP\_011705715) (atsH) Type VI secretion system protein [T6SS (VF0480) - Effector delivery system (VFC0001)]

VFG000924(gb|WP\_001234311) (fepB) ferrienterobactin ABC transporter periplasmic binding protein [Enterobacteriaceae (VF0126) - Adherence (VFC0001)]

VFG048787(gb|WP\_004176417) (sciN/tssJ) type VI secretion system lipoprotein TssJ [T6SS (VF0569) - Effector delivery system (VFC0001)]

VFG000943(gb|AAK16476) (draB) chaperone protein DraB [Dr adhesins (VF0223) - Adherence (VFC0001)] [Enterobacteriaceae (VF0126) - Adherence (VFC0001)]

VFG038345(gb|WP\_005320764) (acr2) chaperone protein [T3SS (VF0479) - Effector delivery system (VFC0001)]

VFG008007(gb|NP\_218342) (pks2) phthioceranic/hydroxyphthioceranic acid synthase [Sulfolipid-1 biosynthesis]

VFG038371(gb|WP\_011705707) (vgrG2) VgrG protein [T6SS (VF0480) - Effector delivery system (VFC0086)]

VFG000115(gb|NP\_249839) (toxA) exotoxin A precursor [ExoA (VF0086) - Exotoxin (VFC0235)] [Pseudomonas]

VFG038875(gb|WP\_005314261) (lfgF) lateral flagellar basal-body rod protein LfgF [Lateral flagella (VF0474) - Adherence (VFC0001)]

VFG041011(gb|NP\_248785) (vgrG1b) type VI secretion system substrate VgrG1b [HSI-I (VF0334) - Effector delivery system (VFC0001)]

VFG038537(gb|WP\_016350151) (flpE) Flp pilus assembly protein, ATPase [Flp type IV pili (VF0476) - Adherence (VFC0001)]

VFG049153(gb|WP\_000159201) (clbG) colibactin biosynthesis acyltransferase ClbG [Colibactin (VF0573) - Exotoxin (VFC0235)]

VFG001264(gb|NP\_250144) (flhF) flagellar biosynthesis protein FlhF [Flagella (VF0273) - Motility (VFC0204)]

VFG001364(gb|WP\_001193686) (hysA) hyaluronidase [Hyaluronidase (VF0146) - Exoenzyme (VFC0251)] [Streptococcus]

VFG001228(gb|NP\_249102) (pilJ) twitching motility protein PilJ [Type IV pili (VF0082) - Adherence (VFC0001)]

VFG050169(gb|WP\_000124301) (kpsM) Polysialic acid transport protein [K1 capsule (VF0239) - Invasion (VFC0001)]

VFG049149(gb|WP\_041169023) (clbC) colibactin polyketide synthase ClbC [Colibactin (VF0573) - Exotoxin (VFC0235)]

VFG043206(gb|WP\_005164479) (cheY) chemotaxis regulatory protein CheY [Flagella (VF0394) - Motility (VFC0204)]

VFG050262(gb|NP\_220136) (CT\_619) hypothetical protein [TTSS secreted effectors (VF0711) - Effector delivery system (VFC0001)]

VFG038367(gb|WP\_011705045) (vgrG1) Type VI secretion system effector VgrG1, ADP-ribosyltransferase [T6SS (VF0480) - Effector delivery system (VFC0001)]

VFG001256(gb|NP\_250134) (fliM) flagellar motor switch protein FliM [Flagella (VF0273) - Motility (VFC0204)]

VFG041304(gb|WP\_010947678) (lirB) Dot/Icm type IV secretion system effector LirB [Dot/Icm T4SS secreted effectors (VF0711) - Effector delivery system (VFC0001)]

VFG001405(gb|NP\_217219) (sigA/rpoV) RNA polymerase sigma factor SigA [SigA (VF0257) - Regulation (VF0001)]

VFG044326(gb|WP\_001327262) (ybtP) yersiniabactin ABC transporter ATP-binding/permease protein YbtP [Yersiniabactin (VF0564) - Exotoxin (VFC0235)]

VFG049062(gb|WP\_015875020) (rfbD) UDP-galactopyranose mutase [LPS (VF0561) - Immune modulation (VF0001)]

VFG044328(gb|WP\_015874963) (irp2) yersiniabactin non-ribosomal peptide synthetase HMWP2 [Ybt (VF0564) - Exotoxin (VFC0235)]

VFG038679(gb|WP\_016350055) (flhB) flagellar biosynthetic protein FlhB [Polar flagella (VF0473) - Motility (VFC0204)]

VFG001248(gb|NP\_249788) (fleQ) transcriptional regulator FleQ [Flagella (VF0273) - Motility (VFC0204)] [Pseudomonas]

VFG001263(gb|NP\_250143) (flhA) flagellar biosynthesis protein FlhA [Flagella (VF0273) - Motility (VFC0204)]

VFG049903(gb|WP\_001240533) (tssA) Type VI secretion system protein TssA [T6SS (VF0579) - Effector delivery system (VFC0001)]

VFG037497(gb|WP\_085947929) (ACICU\_RS04580) TonB-dependent receptor [HemO cluster (VF0636) - Nutrition (VF0001)]

VFG035025(gb|WP\_001443810) (nleG6-1) DUF1076 domain-containing protein [TTSS secreted effectors (VF0711) - Effector delivery system (VFC0001)]

VFG002417(gb|WP\_001301550) (yagV/ecpE) E. coli common pilus chaperone EcpE [ECP (VF0404) - Adherence (VFC0001)]

VFG010515(gb|WP\_010946906) (lidL) Dot/Icm type IV secretion system effector LidL [Dot/Icm T4SS secreted effectors (VF0711) - Effector delivery system (VFC0001)]

VFG050297(gb|NP\_250644) (fapC) major amyloid subunit FapC [Fap (VF1191) - Adherence (VFC0001)] [Pseudomonas]

VFG038391(gb|WP\_011705719) (atsL) Type VI secretion system protein [T6SS (VF0480) - Effector delivery system (VFC0001)]

VFG000944(gb|AAK16477) (draC) usher protein DraC [Dr adhesins (VF0223) - Adherence (VFC0001)] [Escherichia coli]

VFG050787(gb|WP\_001112089.1) (gspF) general secretion pathway protein F [T2SS (VF1335) - Effector delivery system (VFC0001)]

VFG048797(gb|WP\_004175261) (ugd) UDP-glucose 6-dehydrogenase [Capsule (VF0560) - Immune modulation (VF0001)]

VFG007574(gb|WP\_001030417) (fliA) flagellar biosynthesis sigma factor FliA [Flagella (VF0519) - Motility (VFC0204)]

VFG038432(gb|WP\_016352168) (tapB) type IV pilus assembly ATPase, PilB-like [Tap type IV pili (VF0475) - Adherence (VFC0001)]

VFG050158(gb|WP\_000905916) (kpsE) Capsule polysaccharide export inner-membrane protein [K1 capsule (VF0239) - Invasion (VFC0001)]

VFG000931(gb|WP\_001336900) (entC) isochorismate synthase 1 [Enterobactin (VF0228) - Nutritional/Metabolism (VF0001)]

VFG013070(gb|WP\_001626196) (shuV) ATP-binding component of hemin transport system [Shu (VF0256) - Nutrition (VF0001)]

VFG000887(gb|WP\_000597713) (papK) P pilus minor subunit PapK [P fimbriae (VF0220) - Adherence (VFC0001)]

VFG002269(gb|WP\_011181342) (trwD) Trw type IV secretion system VirB11 homolog, trwD protein [Trw type IV pili (VF0475) - Adherence (VFC0001)]

VFG038596(gb|WP\_016349157) (mshM) membrane protein with ATPase domain, GspA-like [MSHA type IV pili (VF0475) - Adherence (VFC0001)]

VFG000919(gb|WP\_001095619) (chuW) Putative oxygen independent coproporphyrinogen III oxidase [Chu (VF0256) - Nutrition (VF0001)]

VFG002063(gb|NP\_248767) (icmF1/tssM1) type VI secretion system protein IcmF1 [HSI-I (VF0334) - Effector delivery system (VFC0001)]

VFG049835(gb|WP\_012076956) (exlA) hemolysin [Exolysin (VF0582) - Effector delivery system (VFC0086)] [Pseudomonas]

VFG037720(gb|WP\_001027056) (adeG) cation/multidrug efflux pump [AdeFGH efflux pump (VF0504) - Biofilm formation (VF0001)]

VFG000363(gb|WP\_002212775) (*irp2*) yersiniabactin biosynthetic protein Irp2 [Yersiniabactin (VF0136) - Nutri  
VFG034901(gb|WP\_000868321) (*espY2*) Type III secretion system effector EspY2 [TTSS secreted effectors (VF  
VFG038707(gb|WP\_016350059) (*cheA-2*) chemotaxis protein CheA [Polar flagella (VF0473) - Motility (VFC02  
VFG007027(gb|WP\_001092347) (*rtxD*) RTX toxin transporter RtxD [MARTX (VF0265) - Exotoxin (VFC0235)  
VFG002280(gb|WP\_011010361) (*nagK*) hyaluronidase [Mu-toxin (VF0389) - Exoenzyme (VFC0251)] [Clostrid  
VFG034754(gb|WP\_000081129) (*espL1*) Type III secretion system effector espL1 [TTSS secreted effectors (VF  
VFG034648(gb|WP\_001245988) (*cfaD/cfaE*) minor pilin and initiator [Adhesive fimbriae (VF0213) - Adherence  
VFG038711(gb|WP\_016350060) (*cheB-2*) chemotaxis-specific methylesterase [Polar flagella (VF0473) - Motilit  
VFG041014(gb|NP\_250347) (PA1656) hypothetical protein [HSI-2 (VF0943) - Effector delivery system (VFC00  
VFG044328(gb|WP\_015874963) (*irp2*) yersiniabactin non-ribosomal peptide synthetase HMWP2 [Ybt (VF0564  
VFG038881(gb|WP\_005314249) (*lfgL*) lateral flagellar hook-associated protein, LfgL [Lateral flagella (VF0474)  
VFG002189(gb|WP\_002359680) (*cpsB/cdsA*) phosphatidate cytidyltransferase [Capsule (VF0361) - Immune n  
VFG048606(gb|WP\_004213922) (*iucC*) aerobactin siderophore biosynthesis protein IucC [Aerobactin (VF0565)  
VFG038468(gb|WP\_016351972) (*tapU*) twitching ATPase [Tap type IV pili (VF0475) - Adherence (VFC0001)]  
VFG038373(gb|WP\_011705708) (*atsA*) Type VI secretion system protein [T6SS (VF0480) - Effector delivery sy  
VFG016069(gb|NP\_251115) (*pvdG*) pyoverdine biosynthesis protein PvdG [Pyoverdine (VF0094) - Nutritional/M  
VFG012636(gb|NP\_858256) (*virB*) transcriptional activator VirB [TTSS (VF0118) - Effector delivery system (V  
VFG013066 (*shuW*) heme anaerobic degradation radical SAM methyltransferase ChuW/HutW [Shu (VF0256) - I  
VFG038691(gb|WP\_010634619) (*flhG*) CobQ/CobB/MinD/ParA family protein [Polar flagella (VF0473) - Motil  
VFG000337(gb|WP\_005693332) (*iga1*) immunoglobulin A1 protease [IgA1 protease (VF0045) - Exoenzyme (VFC  
VFG038824(gb|WP\_011706648) (*flgM*) anti-sigma-D factor [Polar flagella (VF0473) - Motility (VFC0204)] [Ae  
VFG002529(gb|WP\_011205290) (*tsr*) methyl-accepting chemotaxis protein I [Flagella (VF0430) - Motility (VFC  
VFG042734(gb|NP\_249343) (*vfr*) cAMP-regulatory protein [Type IV pili (VF0082) - Adherence (VFC0001)] [P  
VFG001927(gb|YP\_002344848) (*flgK*) flagellar hook-associated protein 1 FlgK [Flagella (VF0114) - Motility (V  
VFG002195(gb|WP\_002399773) (EF0818) polysaccharide lyase, family 8 [Hyaluronidase (VF0359) - Exoenzym  
VFG048429(gb|WP\_004183353) (*entE*) enterobactin synthase subunit E [Ent (VF0562) - Nutritional/Metabolic f  
VFG012597(gb|WP\_000089593) (*chuA*) Outer membrane heme/hemoglobin receptor ChuA [Chu (VF0234) - Nu  
VFG040815(gb|WP\_041471735) (*rickA*) WASP, N-WASP, MENA proteins [RickA (VF0490) - Motility (VFC0  
VFG002462(gb|WP\_004555023) (*bsaP*) Type III secretion system gate keeper protein [Bsa T3SS (VF0428) - Eff  
VFG048327(gb|WP\_004152886) (*mrkH*) transcriptional activator [Type 3 fimbriae (VF0567) - Biofilm (VFC027  
VFG000116(gb|NP\_254170) (*algB*) two-component response regulator AlgB [Alginate (VF0091) - Biofilm (VFC  
VFG037442(gb|WP\_000910253) (*basA*) acinetobactin biosynthesis protein [Acinetobactin (VF0467) - Nutritional  
VFG002047(gb|WP\_000498818) (*gspD*) general secretion pathway protein D [T2SS (VF0333) - Effector delivery  
VFG000902(gb|WP\_001034089) (*sat*) Accreted auto transporter toxin [Sat (VF0231) - Effector delivery system (V  
VFG038731(gb|WP\_016350347) (*flaA*) flagellin [Polar flagella (VF0473) - Motility (VFC0204)] [Aeromonas hy  
VFG041109(gb|NP\_459283) (STM0285) hypothetical protein [SCI (Salmonella centrisome island) (VF0974) - E  
VFG000211(gb|NP\_250407) (*pscC*) type III secretion system secretin PscC [TTSS (VF0083) - Effector delivery  
VFG000263(gb|WP\_010980796) (*tbpB*) transferrin-binding protein B [Tbp (VF0046) - Nutritional/Metabolic fac  
VFG002070(gb|NP\_248774) (*hsiC1/vipB/tssC*) type VI secretion system tubule-forming protein VipB [HSI-I (VF  
VFG048985(gb|WP\_014907219) (KP1\_RS17355) phosphatase PAP2 family protein [Capsule (VF0560) - Immun  
VFG042568(gb|WP\_000012016) (*sfaY*) transcriptional regulator SfaY [F1C fimbriae (VF0224) - Adherence (VF  
VFG045788(gb|WP\_001189322) (*cgsG*) curli production assembly/transport protein CsgG [Curli fibers (VF1138  
VFG000907(gb|WP\_000376545) (*hlyB*) Hemolysin B [-Hemolysin (VF0225) - Exotoxin (VFC0235)] [Escherich  
VFG043016(gb|NP\_250155) (PA1464) purine-binding chemotaxis protein [Flagella (VF0273) - Motility (VFC02  
VFG050959(gb|WP\_000556915.1) (*tssM*) type VI secretion system membrane subunit TssM [T6SS (VF1337) - I  
VFG048830(gb|WP\_014907233) (*gndA*) NADP-dependent phosphogluconate dehydrogenase [Capsule (VF0560

VFG038405(gb|WP\_011705727) (AHA\_RS09305) type VI secretion system PAAR protein [T6SS (VF0480) - Effector delivery system (VFC0001)]

VFG038397(gb|WP\_011705722) (vasH) sigma-54 dependent transcriptional regulator [T6SS (VF0480) - Effector delivery system (VFC0001)]

VFG000130(gb|NP\_252238) (algI) alginate o-acetyltransferase AlgI [Alginate (VF0091) - Biofilm (VFC0271)]

VFG038695(gb|WP\_017409955) (fliA) flagellar biosynthesis sigma factor [Polar flagella (VF0473) - Motility (VFC0204)]

VFG034772(gb|WP\_000627910) (espL4) Type III secretion system effector EspL4 [TTSS secreted effectors (VF0083) - Adherence (VFC0001)]

VFG034895(gb|WP\_001304001) (espY1) Type III secretion system effector EspY1 [TTSS secreted effectors (VF0083) - Adherence (VFC0001)]

VFG001410(gb|NP\_217458) (mmpL7) transmembrane transport protein MmpL7 [PDIM (VF0309) - Immune modulation (VFC0001)]

VFG001266(gb|NP\_252912) (pchI) ABC transporter ATP-binding protein [Pyochelin (VF0095) - Nutritional/Metabolic (VFC0001)]

VFG049900 (tssM) Type VI secretion system protein TssM [T6SS (VF0579) - Effector delivery system (VFC0001)]

VFG037897(gb|WP\_001165095) (tviB) Vi polysaccharide biosynthesis UDP-N-acetylglucosamine C-6 dehydrogenase [Vi polysaccharide (VF0091) - Biofilm (VFC0271)]

VFG016046(gb|NP\_251103) (pvdH) diaminobutyrate-2-oxoglutarate aminotransferase PvdH [Pyoverdine (VF0091) - Biofilm (VFC0271)]

VFG033393(gb|WP\_001234181) (sfaH) S fimbriae adhesin SfaH [S fimbriae (VF0235) - Adherence (VFC0001)]

VFG048478(gb|WP\_004147521) (fepG) iron-enterobactin transporter permease [Ent (VF0562) - Nutritional/Metabolic (VFC0001)]

VFG049051(gb|WP\_014907239) (KP1\_RS17230) glycosyltransferase [LPS (VF0561) - Immune modulation (VFC0001)]

VFG001959(gb|YP\_002344814) (hddC) capsular polysaccharide heptosyltransferase [Capsule (VF0323) - Immune modulation (VFC0001)]

VFG038402(gb|WP\_011705725) (vasK/icmF) Type VI secretion system protein [T6SS (VF0480) - Effector delivery system (VFC0001)]

VFG001145(gb|CAA83901) (hifB) periplasmic chaperone [Haemagglutinating pili (VF0036) - Adherence (VFC0001)]

VFG002067(gb|NP\_248771) (fha1) type VI secretion system forkhead-associated protein Fha1 [HSI-I (VF0334) - Adherence (VFC0001)]

VFG002481(gb|WP\_009940775) (vgrG-5) Type VI secretion system protein VgrG5 [T6SS-1 (VF0429) - Effector delivery system (VFC0001)]

VFG000193(gb|NP\_250389) (popN) type III secretion system outer membrane protein PopN [TTSS (VF0083) - Adherence (VFC0001)]

VFG001228(gb|NP\_249102) (pilJ) twitching motility protein PilJ [Type IV pili (VF0082) - Adherence (VFC0001)]

VFG038623(gb|WP\_011705271) (fliE) flagellar hook-basal body complex protein FliE [Polar flagella (VF0473) - Motility (VFC0204)]

VFG000340(gb|WP\_005694039) (hxuA) heme-hemopexin utilization protein A, two-partner secretion (TPS) pathway [HemO cluster (VF0326) - Immune modulation (VFC0001)]

VFG006543(gb|WP\_001266636) (flgL) flagellar hook-associated protein 3 FlgL [Flagella (VF0051) - Motility (VFC0204)]

VFG001214(gb|NP\_253237) (pilR) two-component response regulator PilR [Type IV pili (VF0082) - Adherence (VFC0001)]

VFG037482(gb|WP\_004748062) (ACICU\_RS04570) sigma-70 family RNA polymerase sigma factor [HemO cluster (VF0326) - Immune modulation (VFC0001)]

VFG002054(gb|WP\_000633233) (gspK) general secretion pathway protein K [T2SS (VF0333) - Effector delivery system (VFC0001)]

VFG050457(gb|WP\_001274990.1) (pilB) type IV-A pilus assembly ATPase PilB [TFP (VF1334) - Adherence (VFC0001)]

VFG001940(gb|YP\_002344532) (wlaN) beta-1,3 galactosyltransferase [LOS (VF0326) - Immune modulation (VFC0001)]

VFG000878(gb|WP\_000872015) (fimG) FimG protein precursor [Type 1 fimbriae (VF0221) - Adherence (VFC0001)]

VFG038525(gb|WP\_043118801) (flpH) Flp pilus assembly protein FlpH [Flp type IV pili (VF0476) - Adherence (VFC0001)]

VFG012115 (cdtB) CdtB [CDT (VF0385) - Exotoxin (VFC0235)] [Clostridium difficile 630]

VFG018682(gb|WP\_005491021) (vopL) type III secretion system effector VopL, actin filament nucleation activity [VopL (VF0385) - Exotoxin (VFC0235)] [Clostridium difficile 630]

VFG002400(gb|YP\_177838) (esxN) ESX-5 type VII secretion system EsxA (ESAT-6) homolog [ESX-5 (VF0400) - Exotoxin (VFC0235)] [Mycobacterium tuberculosis H37Rv]

VFG038509(gb|WP\_016350158) (flpL) Flp pilus pseudopilin [Flp type IV pili (VF0476) - Adherence (VFC0001)]

VFG042861(gb|WP\_011213223) (pilY1) type IV pilus biogenesis PilY1-related protein [Type IV pili (VF0155) - Adherence (VFC0001)]

VFG002290(gb|WP\_004456321) (cpb) beta toxin [Beta-toxin (CPB) (VF0379) - Exotoxin (VFC0235)] [Clostridium difficile 630]

VFG000182(gb|NP\_251793) (xcpR) general secretion pathway protein E [Xcp secretion system (VF0084) - Effector delivery system (VFC0001)]

VFG002276(gb|WP\_011009653) (colA) collagenase [Kappa-toxin (VF0388) - Exoenzyme (VFC0251)] [Clostridium difficile 630]

VFG002433(gb|WP\_004187526) (pilO) type IV pilus inner membrane platform protein PilO [Type IV pili (VF0082) - Adherence (VFC0001)]

VFG038816(gb|WP\_011706646) (cheV) CheV [Polar flagella (VF0473) - Motility (VFC0204)] [Aeromonas hydrophila]

VFG002248(gb|WP\_011181145) (bepG) Bartonella effector protein BepG [VirB/VirD4 T4SS secreted effectors (VF0083) - Adherence (VFC0001)]

VFG045792(gb|WP\_000791650) (csgB) curlin minor subunit CsgB [Curli fibers (VF1138) - Adherence (VFC0001)]

VFG038913 (rtxA) multifunctional autoprocessing repeats-in-toxins (MARTX) toxin [RtxA (VF0482) - Exotoxin (VFC0235)] [Clostridium difficile 630]

VFG038380(gb|WP\_043163044) (vipB) Type VI secretion system contractile sheath large subunit TssC/VipB [T6SS (VF0480) - Effector delivery system (VFC0001)]

VFG000265(gb|WP\_002225048) (lbpB) lactoferrin-binding protein B [Lbp (VF0047) - Nutritional/Metabolic (VFC0001)]



VFG001814(gb|NP\_215678) (narH) nitrate reductase subunit beta [Nitrate reductase (VF0302) - Nutritional/Meta  
VFG034866(gb|WP\_000900547) (espX4) Type III secretion system effector EspX4 [TTSS secreted effectors (VF  
VFG050400(gb|WP\_000347039.1) (pilU) PilT/PilU family type 4a pilus ATPase [TFP (VF1334) - Adherence (VF  
VFG038389(gb|WP\_011705718) (atsK) Type VI secretion system protein [T6SS (VF0480) - Effector delivery sy  
VFG043211(gb|WP\_032902679) (cheA) chemotaxis protein CheA [Flagella (VF0394) - Motility (VFC0204)] [Y  
VFG002380(gb|NP\_218385) (eccA1) ESX-1 type VII secretion system AAA+ ATPase EccA1 [ESX-1 (VF0315)  
VFG038593(gb|WP\_016349158) (mshN) Tetratricopeptide repeat protein, PilF-like [MSHA type IV pili (VF047  
VFG038393(gb|WP\_010634228) (dotU) Type VI secretion system protein DotU [T6SS (VF0480) - Effector deliv  
VFG001142(gb|WP\_042960771) (hopZ) outer membrane protein adhesin [HopZ (VF0054) - Adherence (VFC00  
VFG038768(gb|WP\_016351318) (flgL) flagellar hook-associated protein FlgL [Polar flagella (VF0473) - Motility  
VFG038880(gb|WP\_005314250) (lfgK) lateral flagellar hook-associated protein [Lateral flagella (VF0474) - Mot  
VFG042736(gb|NP\_253152) (rpoN) RNA polymerase factor sigma-54 [Type IV pili (VF0082) - Adherence (VFC  
VFG038890(gb|WP\_005314213) (lafU) LafU, chemotaxis protein [Lateral flagella (VF0474) - Motility (VFC020  
VFG038305(gb|WP\_016349343) (exeL) general secretion pathway protein L [Exe T2SS (VF0478) - Effector del  
VFG038600(gb|WP\_016349156) (mshL) MSHA (mannose-sensitive hemagglutinin) pili biogenesis protein MshL  
VFG048687(gb|WP\_002902160) (hcp/tssD) type VI secretion system protein, Hcp family [T6SS (VF0569) - Eff  
VFG000195(gb|NP\_250391) (pcr2) type III secretion system protein Pcr2 [TTSS (VF0083) - Effector delivery sy  
VFG038719(gb|WP\_016350061) (pomB) ompA family protein [Polar flagella (VF0473) - Motility (VFC0204)] [Y  
VFG001224(gb|NP\_249087) (pilU) twitching motility protein PilU [Type IV pili (VF0082) - Adherence (VFC00  
VFG000353(gb|WP\_002208792) (psaC) outer membrane usher protein PsaC [Myf/pH6 antigen (VF0134) - Adhe  
VFG049007(gb|WP\_002911561) (rcsA) transcriptional activator for ctr capsule biosynthesis [RcsAB (VF0571) -  
VFG038627(gb|WP\_016350050) (fliF) flagellar MS-ring protein [Polar flagella (VF0473) - Motility (VFC0204)]  
VFG041104(gb|NP\_459278) (STM0280) type VI secretion system-associated lipoprotein [SCI (Salmonella centr  
VFG038727(gb|WP\_011705295) (cheW) chemotaxis protein CheW [Polar flagella (VF0473) - Motility (VFC020  
VFG011671(gb|YP\_002344801) (Cj1418c) hypothetical protein [Capsule (VF0323) - Immune modulation (VFC  
VFG049912 (tssC) Type VI secretion system protein TssC [T6SS (VF0579) - Effector delivery system (VFC008  
VFG038277(gb|WP\_016349336) (exeE) general secretory pathway protein E [Exe T2SS (VF0478) - Effector del  
VFG043778(gb|CAA52275) (bont) botulinum neurotoxin, BoNT [BoNT (VF0375) - Exotoxin (VFC0235)] [Clostridi  
VFG038521(gb|WP\_016350155) (flpI) Flp pilus assembly protein FlpI [Flp type IV pili (VF0476) - Adherence (VF  
VFG016058(gb|NP\_251114) (pvdL) peptide synthase PvdL [Pyoverdine (VF0094) - Nutritional/Metabolic factor  
VFG038488(gb|WP\_016349432) (tapY1) type IV pilus biogenesis protein [Tap type IV pili (VF0475) - Adherence  
VFG038545(gb|WP\_043118798) (flpC) Flp pilus secretin FlpC [Flp type IV pili (VF0476) - Adherence (VFC00  
VFG012509(gb|WP\_001111200) (iroC) ATP binding cassette transporter [Salmochelinsiderophore (VF0230) - N  
VFG000360(gb|WP\_002212799) (ybtT) type II thioesterase YbtT [Yersiniabactin (VF0136) - Nutritional/Metabo  
VFG000923(gb|WP\_001034892) (fepA) ferrienterobactin outer membrane transporter [Enterobactin (VF0228) - I  
VFG043625(gb|WP\_000813718) (mrkC) fimbrial biogenesis outer membrane usher protein mrkC precursor [Typ  
VFG002278(gb|WP\_011010095) (nagl) hyaluronidase [Mu-toxin (VF0389) - Exoenzyme (VFC0251)] [Clostridi  
VFG048676(gb|WP\_014907726) (ompA) OmpA family protein [T6SS (VF0569) - Effector delivery system (VFC  
VFG000877(gb|WP\_001244821) (fimF) FimF protein precursor [Type 1 fimbriae (VF0221) - Adherence (VFC00  
VFG039226(gb|NP\_819077) (cetCb1) Coxiella Dot/Icm type IVB secretion system translocated effector, Coxiella  
VFG038723(gb|WP\_011705294) (AHML\_RS07540) CobQ/CobB/MinD/ParA family protein [Polar flagella (VF  
VFG001218(gb|NP\_253727) (pilQ) type 4 fimbrial biogenesis protein PilQ [Type IV pili (VF0082) - Adherence  
VFG002440(gb|WP\_011204593) (bprB) two-component response regulator [Bsa T3SS (VF0428) - Effector deliv  
VFG049062(gb|WP\_015875020) (rfbD) UDP-galactopyranose mutase [LPS (VF0561) - Immune modulation (VF  
VFG002416(gb|WP\_001265657) (yagW/ecpD) polymerized tip adhesin of ECP fibers [ECP (VF0404) - Adheren  
VFG044159(gb|WP\_000125846) (fes) enterobactin/ferric enterobactin esterase [Enterobactin (VF0228) - Nutritio

VFG002415(gb|WP\_001131063) (yagX/ecpC) *E. coli* common pilus usher EcpC [ECP (VF0404) - Adherence (VF0404)]

VFG001826(gb|NP\_217099) (relA) Probable GTP pyrophosphokinase RelA (ATP:GTP 3'-pyrophosphotransferase) [RelA (VF0404) - Adherence (VF0404)]

VFG048885(gb|WP\_014907227) (gmd) GDP-mannose 4,6-dehydratase [Capsule (VF0560) - Immune modulation (VF0560)]

VFG046732(gb|WP\_003020707) (FTT\_RS04140) glycosyltransferase family 2 protein [Capsule (VF0543) - Immune modulation (VF0543)]

VFG050266(gb|NP\_220214) (CT\_695) hypothetical protein [TTSS secreted effectors (VF0711) - Effector delivery system (VF0711)]

VFG038472(gb|WP\_011706550) (tapW) twitching ATPase [Tap type IV pili (VF0475) - Adherence (VFC0001)]

VFG038331(gb|WP\_005320790) (exsD) Type III secretion system protein ExsD [T3SS (VF0479) - Effector delivery system (VF0479)]

VFG044096(gb|NP\_252908) (PA4218) transporter [Pyochelin (VF0095) - Nutritional/Metabolic factor (VFC0271)]

VFG012513(gb|WP\_001221122) (iroB) glucosyltransferase IroB [Salmochelin siderophore (VF0230) - Nutrition (VF0230)]

VFG050166(gb|WP\_000066003) (neuB) N-acylneuraminate-9-phosphate synthase [K1 capsule (VF0239) - Invasion (VF0239)]

VFG038369(gb|WP\_011705706) (hcp) hemolysin co-regulated protein [T6SS (VF0480) - Effector delivery system (VF0480)]

VFG016041(gb|NP\_251092) (pvdI) peptide synthase [Pyoverdine (VF0094) - Nutritional/Metabolic factor (VFC0271)]

VFG002348(gb|WP\_005160443) (flgE) flagellar hook protein FlgE [Flagella (VF0394) - Motility (VFC0204)] [Yersinia enterocolitica]

VFG034624(gb|WP\_000755097) (cfaB) colonization factor antigen 1 [Adhesive fimbriae (VF0213) - Adherence (VF0213)]

VFG038864(gb|WP\_073531776) (fliF) flagellar MS-ring protein [Lateral flagella (VF0474) - Motility (VFC0204)]

VFG048498(gb|WP\_012737619) (entF) enterobactin synthase subunit F [Ent (VF0562) - Nutritional/Metabolic factor (VF0562)]

VFG037852(gb|WP\_001075965) (ACICU\_RS00395) polysaccharide biosynthesis tyrosine autokinase [Capsule (VF0560) - Immune modulation (VF0560)]

VFG034815(gb|WP\_000671689) (espR1) Type III secretion system effector espR1 [TTSS secreted effectors (VF0711) - Effector delivery system (VF0711)]

VFG000181(gb|NP\_251792) (xcpS) general secretion pathway protein F [Xcp secretion system (VF0084) - Effector delivery system (VF0084)]

VFG001223(gb|NP\_249086) (pilT) twitching motility protein PilT [Type IV pili (VF0082) - Adherence (VFC0001)]

VFG041291(gb|WP\_010947429) (ppeB) Dot/Icm type IV secretion system effector PpeB [Dot/Icm T4SS secreted effectors (VF0475) - Adherence (VFC0001)]

VFG034922(gb|WP\_001303732) (espY5) hypothetical protein [TTSS secreted effectors (VF1110) - Effector delivery system (VF1110)]

VFG050270(gb|NP\_220318) (glgA) glycogen synthase [TTSS secreted effectors (VF0711) - Effector delivery system (VF0711)]

VFG044172(gb|WP\_000622316) (chuV) ATP-binding hydrophilic protein ChuV [Chu (VF0227) - Nutritional/Metabolic factor (VF0227)]

VFG037274(gb|WP\_001281538) (barA) siderophore efflux system of the ABC superfamily [Acinetobactin (VF0474) - Motility (VFC0204)]

VFG014893(gb|NP\_254009) (algC) phosphomannomutase AlgC [Alginate (VF0091) - Biofilm (VFC0271)] [Pseudomonas aeruginosa]

VFG041011(gb|NP\_248785) (vgrG1b) type VI secretion system substrate VgrG1b [HSI-I (VF0334) - Effector delivery system (VF0334)]

VFG048643(gb|WP\_014907727) (vipB/tssC) type VI secretion system contractile sheath large subunit VipB [T6SS (VF0480) - Effector delivery system (VF0480)]

VFG001444(gb|AAG10151) (aslA) putative arylsulfatase [AslA (VF0238) - Invasion (VFC0083)] [Escherichia coli]

VFG000929(gb|WP\_001375021) (entD) phosphopantetheinyl transferase component of enterobactin synthase mu

VFG000190(gb|NP\_250386) (pscP) type III secretion system protein PscP [TTSS (VF0083) - Effector delivery system (VF0083)]

VFG007460(gb|WP\_000012402) (fliH) flagellar assembly protein [Flagella (VF0519) - Motility (VFC0204)] [Vibrio cholerae]

VFG000229 (pilS) pilin [Type IV pili (VF0075) - Adherence (VFC0001)] [Neisseria meningitidis MC58]

VFG000368(gb|WP\_000703040) (ybtS) salicylate synthase Irp9 [Yersiniabactin (VF0136) - Nutritional/Metabolic factor (VF0136)]

VFG038529(gb|WP\_016350153) (flpG) Flp pilus assembly protein FlpG [Flp type IV pili (VF0476) - Adherence (VFC0001)]

VFG046191 (CBU\_1495\*) Coxiella Dot/Icm type IVB secretion system translocated effector [T4SS secreted effectors (VF0475) - Adherence (VFC0001)]

VFG000903(gb|WP\_001045652) (pic) Pic serine protease precursor, autotransporter [Pic (VF0232) - Effector delivery system (VF0232)]

VFG038832(gb|WP\_016351724) (pomB2) flagellar motor protein MotB [Polar flagella (VF0473) - Motility (VFC0204)]

VFG048277(gb|WP\_009308599) (fimD) outer membrane usher protein [Type I fimbriae (VF0566) - Adherence (VF0566)]

VFG016463(gb|WP\_011206020) (p97) protein p97; cilium adhesin [P97/P102 paralog family (VF0426) - Adherence (VF0426)]

VFG002277(gb|WP\_011009663) (nagH) hyaluronidase [Mu-toxin (VF0389) - Exoenzyme (VFC0251)] [Clostridium difficile]

VFG002003(gb|WP\_010947482) (fliJ) flagellar protein FliJ [Flagella (VF0157) - Motility (VFC0204)] [Legionella pneumophila]

VFG048459(gb|WP\_004147525) (entS) enterobactin exporter EntS [Ent (VF0562) - Nutritional/Metabolic factor (VF0562)]

VFG038651(gb|WP\_011705278) (fliL) flagellar basal body-associated protein FliL [Polar flagella (VF0473) - Motility (VFC0204)]

VFG050912(gb|WP\_000898330.1) (vgrG/tssI) type VI secretion system tip protein VgrG [T6SS (VF1337) - Effector delivery system (VF1337)]

VFG000060(gb|WP\_010930827) (bopN) Bordetella Bsc type III secretion system secreted protein BopN [TTSS secreted effectors (VF0475) - Adherence (VFC0001)]

VFG038417(gb|WP\_016349294) (*fimD*) fimbrial chaperone protein [Type I pili (VF0486) - Adherence (VFC000)]

VFG041013(gb|NP\_250203) (*hcpA*) secreted protein Hcp [HSI-2 (VF0943) - Effector delivery system (VFC0086)]

VFG048990(gb|WP\_001741945) (*galF*) GalU regulator GalF [Capsule (VF0560) - Immune modulation (VFC025)]

VFG002369(gb|WP\_011816869) (*YE\_RS15450*) hypothetical protein [O-antigen (VF0392) - Immune modulation (VFC000)]

VFG014117(gb|NP\_251831) (*wbpM*) nucleotide sugar epimerase/dehydratase WbpM [LPS (VF0085) - Immune modulation (VFC000)]

VFG041284(gb|WP\_010947327) (*lem11*) Dot/Icm type IV secretion system effector Lem11 [Dot/Icm T4SS secreted (VF0156) - Adherence (VFC000)]

VFG002548(gb|WP\_004550042) (*wcbR*) capsular polysaccharide biosynthesis fatty acid synthase [Capsule I (VF0560) - Immune modulation (VFC025)]

VFG001225(gb|NP\_249099) (*pilG*) twitching motility protein PilG [Type IV pili (VF0082) - Adherence (VFC000)]

VFG038273(gb|WP\_016349335) (*exeD*) general secretion pathway protein D [Exe T2SS (VF0478) - Effector delivery system (VFC0086)]

VFG050217(gb|WP\_011860976) (*CD0873*) ABC transporter substrate-binding protein [CD0873 (VF0593) - Adherence (VFC000)]

VFG001231(gb|NP\_249104) (*chpA*) still frameshift probable component of chemotactic signal transduction system [ChpA (VF0034) - Immune modulation (VFC025)]

VFG000028(gb|WP\_003808614) (*brkB*) serum resistance protein [Brk (VF0034) - Immune modulation (VFC025)]

VFG007953(gb|NP\_217474) (*Rv2958c*) PGL/p-HBAD biosynthesis glycosyltransferase [PDIM (VF0309) - Immune modulation (VFC000)]

VFG000123(gb|NP\_252231) (*alg8*) alginate-c5-mannuronan-epimerase AlgG [Alginate (VF0091) - Biofilm (VFC000)]

VFG043208(gb|WP\_005164483) (*cheR*) chemotaxis methyltransferase CheR [Flagella (VF0394) - Motility (VFC0204)]

VFG038537(gb|WP\_016350151) (*flpE*) Flp pilus assembly protein, ATPase [Flp type IV pili (VF0476) - Adherence (VFC000)]

VFG038643(gb|WP\_011705276) (*fliJ*) flagellar export protein FliJ [Polar flagella (VF0473) - Motility (VFC0204)]

VFG002412(gb|WP\_000716386) (*yagY/ecpB*) E. coli common pilus chaperone EcpB [ECP (VF0404) - Adherence (VFC000)]

VFG001254(gb|NP\_249795) (*fliI*) flagellum-specific ATP synthase FliI [Flagella (VF0273) - Motility (VFC0204)]

VFG048755(gb|WP\_049127998) (*icmF/tssM*) type VI secretion protein TssM [T6SS (VF0569) - Effector delivery system (VFC0086)]

VFG001447(gb|CAA50007) (*cnf1*) cytotoxic necrotizing factor 1 [CNF-1 (VF0240) - Exotoxin (VFC0235)] [Escerichia coli (VF0000)]

VFG038671(gb|WP\_011705282) (*fliQ*) flagellar biosynthetic protein FliQ [Polar flagella (VF0473) - Motility (VFC0204)]

VFG045632(gb|WP\_002286924) (*ecbA/fss3*) Collagen binding MSCRAMM, EcbA/Fss3 [EcbA (VF0539) - Adherence (VFC000)]

VFG037400(gb|WP\_001223274) (*bauC*) ferric siderophore ABC transporter, permease protein BauC [Acinetobacter baumannii (VF0000)]

VFG002107(gb|WP\_010946358) (*sidA*) Dot/Icm type IV secretion system effector SidA [Dot/Icm T4SS secreted (VF0156) - Adherence (VFC000)]

VFG038857(gb|WP\_005314307) (*fliP*) flagellar biosynthesis protein FliP [Lateral flagella (VF0474) - Motility (VFC0204)]

VFG050670(gb|WP\_000505931.1) (*pilJ*) methyl-accepting chemotaxis protein [TFP (VF1334) - Adherence (VFC000)]

VFG038348(gb|WP\_005320755) (*ascN*) Type III secretion system ATPase [T3SS (VF0479) - Effector delivery system (VFC0086)]

VFG038703(gb|WP\_011705289) (*cheZ*) chemotaxis protein CheZ [Polar flagella (VF0473) - Motility (VFC0204)]

VFG001259(gb|NP\_250137) (*fliP*) flagellar biosynthetic protein FliP [Flagella (VF0273) - Motility (VFC0204)]

VFG050699(gb|WP\_000840548.1) (*pilR*) sigma-54 dependent transcriptional regulator [TFP (VF1334) - Adherence (VFC000)]

VFG049909(gb|WP\_001113715) (*fha*) Type VI secretion system protein Fha [T6SS (VF0579) - Effector delivery system (VFC0086)]

VFG049906 (*tssK*) Type VI secretion system protein TssK [T6SS (VF0579) - Effector delivery system (VFC0086)]

VFG038876(gb|WP\_005314259) (*lfgG*) lateral flagellar basal-body rod protein LfgG [Lateral flagella (VF0474) - Motility (VFC0204)]

VFG049029(gb|WP\_014907241) (*KP1\_RS17220*) glycosyltransferase [LPS (VF0561) - Immune modulation (VFC025)]

VFG038281(gb|WP\_016349337) (*exeF*) general secretion pathway protein F [Exe T2SS (VF0478) - Effector delivery system (VFC0086)]

VFG038615(gb|WP\_016349152) (*mshI*) MSHA (mannose-sensitive hemagglutinin) pili biogenesis protein MshI [Type 1 fimbriae (VF0221) - Adherence (VFC000)]

VFG000872(gb|WP\_000044711) (*fimE*) Type 1 fimbriae Regulatory protein fimE [Type 1 fimbriae (VF0221) - Adherence (VFC000)]

VFG040864(gb|WP\_001172770) (*essC*) type VII secretion system protein EssC [T7SS (VF0581) - Effector delivery system (VFC0086)]

VFG038371(gb|WP\_011705707) (*vgrG2*) VgrG protein [T6SS (VF0480) - Effector delivery system (VFC0086)]

VFG002450(gb|WP\_004533397) (*bipB*) Type III secretion system translocator protein BipB [Bsa T3SS (VF0428) - Effector delivery system (VFC0086)]

VFG002401(gb|NP\_216314) (*eccA5*) ESX-5 type VII secretion system AAA+ ATPase EccA5 [ESX-5 (VF0402) - Effector delivery system (VFC0086)]

VFG038155(gb|WP\_000209960) (*ACICU\_RS00500*) phosphomannomutase/phosphoglucomutase [Capsule (VF0560) - Immune modulation (VFC025)]

VFG002049(gb|WP\_001173470) (*gspF*) general secretion pathway protein F [T2SS (VF0333) - Effector delivery system (VFC0086)]

VFG002053(gb|WP\_001250462) (*gspJ*) general secretion pathway protein J [T2SS (VF0333) - Effector delivery system (VFC0086)]

VFG001845(gb|WP\_010946207) (*icmF*) Dot/Icm type IV secretion system protein IcmF [Dot/Icm (VF0156) - Adherence (VFC000)]

VFG000030(gb|WP\_003807102) (bplI) lipopolysaccharide biosynthesis protein [LPS (VF0033) - Immune modulation (VFC0001)] [Francisella tularensis]

VFG040466(gb|WP\_012151379) (ompA) surface cell antigen 0 (Sca0), autotransporter [ROmpA/Sca0 (VF0492) - Adherence (VFC0001)] [Francisella tularensis]

VFG046465(gb|WP\_003028672) (tufA) elongation factor Tu [EF-Tu (VF0460) - Adherence (VFC0001)] [Francisella tularensis]

VFG048468(gb|WP\_004176917) (fepD) iron-enterobactin transporter membrane protein [Ent (VF0562) - Nutrition/Metabolism (VFC0001)] [Enterobacteriaceae]

VFG040031(gb|WP\_011190505) (rvhB6c) VirB6-like protein of the type IV secretion system [Rvh T4SS (VF0488) - Adherence (VFC0001)] [Rickettsia typhi]

VFG009810(gb|NP\_215272) (phoR) Possible two component system response sensor kinase membrane associated protein [PhoR (VF0098) - Adherence (VFC0001)] [Yersinia enterocolitica]

VFG048287(gb|WP\_014906962) (fimF) type 1 fimbrial minor component [Type I fimbriae (VF0566) - Adherence (VFC0001)] [Yersinia enterocolitica]

VFG038675(gb|WP\_011705283) (fliR) flagellar biosynthesis protein FliR [Polar flagella (VF0473) - Motility (VFC0204)] [Yersinia enterocolitica]

VFG038301(gb|WP\_016349342) (exeK) general secretion pathway protein K [Exe T2SS (VF0478) - Effector delivery (VFC0204)] [Yersinia enterocolitica]

VFG038590(gb|WP\_043118275) (mshE) ATPase protein MshE, GspE-like [MSHA type IV pili (VF0477) - Adherence (VFC0001)] [Yersinia enterocolitica]

VFG038796(gb|WP\_016351321) (flgE) flagellar hook protein FlgE [Polar flagella (VF0473) - Motility (VFC0204)] [Yersinia enterocolitica]

VFG002115(gb|WP\_015444209) (sdeB/laiB) Dot/Icm type IV secretion system effector SdeB [Dot/Icm T4SS secretion system (VF0021) - Adherence (VFC0001)] [Yersinia enterocolitica]

VFG044333(gb|WP\_015874968) (fyuA) yersiniabactin receptor FyuA [Ybt (VF0564) - Nutritional/Metabolic factors (VFC0001)] [Yersinia enterocolitica]

VFG044165(gb|WP\_001041793) (entS) enterobactin exporter, iron-regulated [Enterobactin (VF0228) - Nutrition/Metabolism (VFC0001)] [Yersinia enterocolitica]

VFG038367(gb|WP\_011705045) (vgrG1) Type VI secretion system effector VgrG1, ADP-ribosyltransferase [Type VI secretion system (VF0333) - Effector delivery (VFC0204)] [Yersinia enterocolitica]

VFG002055(gb|WP\_000097229) (gspL) general secretion pathway protein L [T2SS (VF0333) - Effector delivery (VFC0204)] [Yersinia enterocolitica]

VFG011850(gb|YP\_002343527) (flhG) ATP-binding protein [Flagella (VF0114) - Motility (VFC0204)] [Campylobacter jejuni]

VFG038581(gb|WP\_043118279) (mshB) MSHA (mannose-sensitive hemagglutinin) pili minor prepilin protein MshB [MSHA type IV pili (VF0477) - Adherence (VFC0001)] [Yersinia enterocolitica]

VFG002172(gb|WP\_010710127) (EF0485) aggregation substance [AS (VF0352) - Adherence (VFC0001)] [Enterobacteriaceae]

VFG038261(gb|WP\_016352107) (exeA) general secretion pathway protein A [Exe T2SS (VF0478) - Effector delivery (VFC0204)] [Yersinia enterocolitica]

VFG050299(gb|NP\_250642) (fapE) chaprone FapE [Fap (VF1191) - Adherence (VFC0001)] [Pseudomonas aeruginosa]

VFG048267(gb|WP\_015875145) (fimC) periplasmic chaperone [Type I fimbriae (VF0566) - Adherence (VFC0001)] [Yersinia enterocolitica]

VFG038764(gb|WP\_017409846) (flrA) FleQ protein [Polar flagella (VF0473) - Motility (VFC0204)] [Aeromonas hydrophila]

VFG012865 (ipaH) invasion plasmid antigen IpaH [TTSS secreted effectors (VF0978) - Effector delivery system (VFC0204)] [Yersinia enterocolitica]

VFG037735(gb|WP\_000633124) (adeH) outer membrane protein [AdeFGH efflux pump (VF0504) - Biofilm (VFC0001)] [Yersinia enterocolitica]

VFG037372(gb|WP\_001104139) (bauB) ferric siderophore ABC transporter, periplasmic siderophore-binding protein [BauB (VF0373) - Iron acquisition (VFC0001)] [Yersinia enterocolitica]

VFG038647(gb|WP\_016350053) (fliK) flagellar hook-length control protein FliK [Polar flagella (VF0473) - Motility (VFC0204)] [Yersinia enterocolitica]

VFG045314(gb|WP\_011213311) (LPG\_RS03800) phosphotransferase [LPS (VF0171) - Immune modulation (VFC0001)] [Yersinia enterocolitica]

VFG000918(gb|WP\_001312167) (chuT) periplasmic heme-binding protein ChuT [Chu (VF0227) - Nutritional/Metabolic factors (VFC0001)] [Yersinia enterocolitica]

VFG049164(gb|WP\_004175305) (clbS) colibactin self-protection protein ClbS [Colibactin (VF0573) - Exotoxin (VFC0235)] [Yersinia enterocolitica]

VFG002050(gb|WP\_001087302) (gspG) general secretion pathway protein G [T2SS (VF0333) - Effector delivery (VFC0204)] [Yersinia enterocolitica]

VFG007280(gb|WP\_000782181) (hap/vvp) hemagglutinin/proteinase HapA [HAP (VF0620) - Exoenzyme (VFC0001)] [Yersinia enterocolitica]

VFG048951(gb|WP\_015875028) (KP1\_RS17330) polysaccharide biosynthesis tyrosine autokinase [Capsule (VF0001) - Adherence (VFC0001)] [Yersinia enterocolitica]

VFG038364(gb|WP\_005320615) (aexT) Type III secretion system effector AexT, bifunctional toxin with GTPase activity [Aerobactin (VF0565) - Nutrition/Metabolism (VFC0001)] [Yersinia enterocolitica]

VFG048609(gb|WP\_004213923) (iucD) lysine 6-monooxygenase IucD [Aerobactin (VF0565) - Nutritional/Metabolic factors (VFC0001)] [Yersinia enterocolitica]

VFG049156(gb|WP\_077265119) (clbJ) colibactin non-ribosomal peptide synthetase ClbJ [Colibactin (VF0573) - Exotoxin (VFC0235)] [Yersinia enterocolitica]

VFG002531(gb|WP\_011205291) (cheA) chemotaxis two-component sensor kinase CheA [Flagella (VF0430) - Motility (VFC0204)] [Yersinia enterocolitica]

VFG001872(gb|WP\_025862367) (lspH) general secretion pathway protein H [Lsp T2SS (VF0154) - Effector delivery (VFC0204)] [Yersinia enterocolitica]

VFG038871(gb|WP\_005314274) (lfgA) lateral flagellar basal body P-ring biosynthesis protein, LfgA [Lateral flagella (VF0430) - Motility (VFC0204)] [Yersinia enterocolitica]

VFG049154(gb|WP\_014907257) (clbH) colibactin non-ribosomal peptide synthetase ClbH [Colibactin (VF0573) - Exotoxin (VFC0235)] [Yersinia enterocolitica]

VFG048620(gb|WP\_014907843) (iutA) ferric aerobactin receptor IutA [Aerobactin (VF0565) - Nutritional/Metabolic factors (VFC0001)] [Yersinia enterocolitica]

VFG000980(gb|WP\_010921949) (speJ) streptococcal exotoxin J precursor [SpeJ (VF0248) - Exotoxin (VFC0235)] [Yersinia enterocolitica]

VFG000937(gb|WP\_000750139) (iucD) L-lysine 6-monooxygenase IucD [Aerobactin (VF0229) - Nutritional/Metabolic factors (VFC0001)] [Yersinia enterocolitica]

VFG000677(gb|AAD32414) (pagA) anthrax toxin moiety, protective antigen [Anthrax toxin (VF0142) - Exotoxin (VFC0235)] [Yersinia enterocolitica]

VFG013418(gb|WP\_005694260) (gmhA/lpcA) phosphoheptose isomerase [LOS (VF0044) - Immune modulation (VFC0001)] [Yersinia enterocolitica]

VFG000616(gb|NP\_709455) (iucB) aerobactin synthesis protein IucB [Aerobactin (VF0123) - Nutritional/Metabolic factors (VFC0001)] [Yersinia enterocolitica]

VFG049904 (clpV/tssH) Type VI secretion system ATPase ClpV/TssH [T6SS (VF0579) - Effector delivery system (VFC0086)] [Yersinia enterocolitica]

VFG000364(gb|WP\_000140406) (ybtA) transcriptional regulator YbtA [Yersiniabactin (VF0136) - Nutritional/Metabolic factor (VFC0272)] [Yersinia enterocolitica]

VFG000114(gb|NP\_253218) (xcpA/pilD) type 4 prepilin peptidase PilD [Type IV pili (VF0082) - Adherence (VFC0001)] [Yersinia enterocolitica]

VFG000930(gb|WP\_000077767) (entF) enterobactin synthase multienzyme complex component, ATP-dependent [Enterobactin (VF0228) - Nutritional/Metabolic factor (VFC0272)] [Yersinia enterocolitica]

VFG044330(gb|WP\_032447695) (ybtU) yersiniabactin biosynthesis oxidoreductase YbtU [Ybt (VF0564) - Nutritional/Metabolic factor (VFC0272)] [Yersinia enterocolitica]

VFG000932(gb|WP\_000026784) (entE) 2,3-dihydroxybenzoate-AMP ligase component of enterobactin synthase [Enterobactin (VF0228) - Nutritional/Metabolic factor (VFC0272)] [Yersinia enterocolitica]

VFG002499(gb|WP\_004197164) (fliI) flagellum-specific ATP synthase FliI [Flagella (VF0430) - Motility (VFC0204)] [Yersinia enterocolitica]

VFG022082(gb|YP\_177711) (PPE4) PPE family protein [ESX-3 (VF0521) - Effector delivery system (VFC0086)] [Yersinia enterocolitica]

VFG002306(gb|NP\_461449) (ratB) putative outer membrane protein [RatB (VF0399) - Adherence (VFC0001)] [Yersinia enterocolitica]

VFG001256(gb|NP\_250134) (fliM) flagellar motor switch protein FliM [Flagella (VF0273) - Motility (VFC0204)] [Yersinia enterocolitica]

VFG038395(gb|WP\_011705721) (clpB) type VI secretion system ATPase ClpV1 [T6SS (VF0480) - Effector delivery system (VFC0086)] [Yersinia enterocolitica]

VFG011524(gb|WP\_002966241) (manBcore) phosphomannomutase [LPS (VF0367) - Immune modulation (VFC0258)] [Yersinia enterocolitica]

VFG038687(gb|WP\_016350057) (flhF) flagellar biosynthesis protein FlhF [Polar flagella (VF0473) - Motility (VFC0204)] [Yersinia enterocolitica]

VFG000264(gb|WP\_002247545) (lbpA) lactoferrin-binding protein A [Lbp (VF0047) - Nutritional/Metabolic factor (VFC0272)] [Yersinia enterocolitica]

VFG000361(gb|WP\_000982866) (ybtU) yersiniabactin biosynthetic protein YbtU [Yersiniabactin (VF0136) - Nutritional/Metabolic factor (VFC0272)] [Yersinia enterocolitica]

VFG012162(gb|WP\_011590241) (nanJ) exo-alpha-sialidase [Sialidase (VF0391) - Exoenzyme (VFC0251)] [Clostridium perfringens]

VFG038269(gb|WP\_075384415) (exeC) general secretion pathway protein C [Exe T2SS (VF0478) - Effector delivery system (VFC0086)] [Yersinia enterocolitica]

VFG002259(gb|WP\_011181332) (trwK) Trw type IV secretion system VirB4-like trwK protein [Trw type IV secretion system (VF0478) - Effector delivery system (VFC0086)] [Yersinia enterocolitica]

VFG049902(gb|WP\_011310140) (tssM) Type VI secretion system protein TssM [T6SS (VF0579) - Effector delivery system (VFC0086)] [Yersinia enterocolitica]

VFG001243(gb|NP\_249776) (flgJ) flagellar rod assembly protein/muramidase FlgJ [Flagella (VF0273) - Motility (VFC0204)] [Yersinia enterocolitica]

VFG000429(gb|WP\_010989299) (tviD) Vi polysaccharide biosynthesis protein TviD [Vi antigen (VF0101) - Immune modulation (VFC0258)] [Yersinia enterocolitica]

VFG040863(gb|WP\_011190526) (sca2) cell surface antigen Sca2 [Sca2 (VF0495) - Motility (VFC0204)] [Rickettsia typhi]

VFG008136(gb|NP\_218340) (mmpL8) integral membrane transport protein MmpL8 [Sulfolipid-1 biosynthesis and transport (VF0495) - Motility (VFC0204)] [Rickettsia typhi]

VFG002048(gb|WP\_000249362) (gspE) general secretion pathway protein E [T2SS (VF0333) - Effector delivery system (VFC0086)] [Yersinia enterocolitica]

VFG000143(gb|NP\_253699) (waaF) heptosyltransferase I [LPS (VF0085) - Immune modulation (VFC0258)] [Pseudomonas aeruginosa]

VFG038788(gb|WP\_011706639) (flgG) flagellar basal body rod protein FlgG [Polar flagella (VF0473) - Motility (VFC0204)] [Yersinia enterocolitica]

VFG022051(gb|NP\_214798) (eccC3) Type VII secretion system protein EccC3 [ESX-3 (VF0521) - Effector delivery system (VFC0086)] [Yersinia enterocolitica]

VFG049162(gb|WP\_002430641) (clbP) precolibactin peptidase ClbP [Colibactin (VF0573) - Exotoxin (VFC0233)] [Yersinia enterocolitica]

VFG002343(gb|WP\_042661457) (flgJ) <beta>-N-acetylglucosaminidase [Flagella (VF0394) - Motility (VFC0204)] [Yersinia enterocolitica]

VFG002414(gb|WP\_000730972) (yagZ/ecpA) E. coli common pilus structural subunit EcpA [ECP (VF0404) - Adherence (VFC0001)] [Yersinia enterocolitica]

VFG042738(gb|NP\_253646) (fimX) protein FimX [Type IV pili (VF0082) - Adherence (VFC0001)] [Pseudomonas aeruginosa]

VFG048551(gb|WP\_011251260) (iroC) ABC transporter [Sal (VF0563) - Nutritional/Metabolic factor (VFC0272)] [Yersinia enterocolitica]

VFG043012(gb|NP\_250147) (cheY) chemotaxis protein CheY [Flagella (VF0273) - Motility (VFC0204)] [Pseudomonas aeruginosa]

VFG000001(gb|WP\_010930610) (fhaB) filamentous hemagglutinin/adhesin [FHA (VF0025) - Adherence (VFC0001)] [Yersinia enterocolitica]

VFG000008(gb|WP\_010930612) (fimC) outer membrane usher protein precursor [Fimbriae (VF0031) - Adherence (VFC0001)] [Yersinia enterocolitica]

VFG000928(gb|WP\_000640938) (fepG) iron-enterobactin ABC transporter permease [Enterobactin (VF0228) - Nutritional/Metabolic factor (VFC0272)] [Yersinia enterocolitica]

VFG048874(gb|WP\_041937789) (KP1\_RS17305) GDP-L-fucose synthase [Capsule (VF0560) - Immune modulation (VFC0258)] [Yersinia enterocolitica]

VFG038576(gb|WP\_016349164) (mshC) MSHA (mannose-sensitive hemagglutinin) pili minor prepilin protein MshC [Type IV pili (VF0082) - Adherence (VFC0001)] [Yersinia enterocolitica]

VFG045349(gb|WP\_000092542) (fdeC) adhesin FdeC [FdeC (VF0506) - Adherence (VFC0001)] [Escherichia coli]

VFG000126(gb|NP\_252234) (algE) alginate biosynthetic protein AlgK precursor [Alginate (VF0091) - Biofilm (VFC0204)] [Yersinia enterocolitica]

VFG000926(gb|WP\_001443194) (fepD) ferrienterobactin ABC transporter permease [Enterobactin (VF0228) - Nutritional/Metabolic factor (VFC0272)] [Yersinia enterocolitica]

VFG002179(gb|AAD09858) (esp) Enterococcal surface protein; Esp [Esp (VF0353) - Adherence (VFC0001)] [Enterococcus faecalis]

VFG001221(gb|NP\_253730) (pilN) type IV pilus inner membrane platform protein PilN [Type IV pili (VF0082) - Adherence (VFC0001)] [Yersinia enterocolitica]

VFG043014(gb|NP\_250149) (PA1458) two-component sensor [Flagella (VF0273) - Motility (VFC0204)] [Pseudomonas aeruginosa]

VFG048307(gb|WP\_041937815) (fimH) type 1 fimbrial adhesin precursor [Type I fimbriae (VF0566) - Adherence (VFC0001)] [Yersinia enterocolitica]

VFG002335(gb|WP\_005160396) (fliM) flagellar motor switch protein FliM [Flagella (VF0394) - Motility (VFC0204)] [Yersinia enterocolitica]

VFG001354(gb|WP\_000728269) (pce/cbpE) choline binding protein E [CBPs (VF0145) - Adherence (VFC0001)]

VFG000876(gb|WP\_000120946) (fimD) Outer membrane usher protein fimD precursor [Type 1 fimbriae (VF0221) - Adherence (VFC0221)]

VFG048488(gb|WP\_002893737) (fepC) iron-enterobactin transporter ATP-binding protein [Ent (VF0562) - Nutritional/Physiological (VFC0562)]

VFG000359(gb|WP\_001088826) (ybtE) yersiniabactin siderophore biosynthetic protein [Yersiniabactin (VF0136) - Nutritional/Physiological (VFC0136)]

VFG003522(gb|WP\_005173749) (YE\_RS17760) hypothetical protein [Ysa TTSS (VF1025) - Effector delivery system (VFC1025)]

VFG000875(gb|WP\_000066579) (fimC) Chaperone protein fimC precursor [Type 1 fimbriae (VF0221) - Adherence (VFC0221)]

VFG038611(gb|WP\_016349153) (mshI1) MSHA (mannose-sensitive hemagglutinin) pili biogenesis protein MshI1 [Type 1 fimbriae (VF0221) - Adherence (VFC0221)]

VFG000908(gb|WP\_000860472) (hlyD) Hemolysin D [-Hemolysin (VF0225) - Exotoxin (VFC0235)] [Escherichia coli (VF0225) - Exotoxin (VFC0235)]

VFG001971(gb|YP\_002344826) (kpsF) D-arabinose 5-phosphate isomerase [Capsule (VF0323) - Immune modulation (VFC0323)]

VFG000384(gb|WP\_002212971) (yscV/lcrD) type III secretion system major export apparatus protein YscV [Type III secretion system (VF0221) - Effector delivery system (VFC0221)]

VFG006171(gb|WP\_002227268) (pilW) type IV fimbrial biogenesis and twitching motility protein PilW [Type IV fimbriae (VF0221) - Adherence (VFC0221)]

VFG037028(gb|WP\_002218620) (katA) catalase [KatA (VF0454) - Stress survival (VFC0282)] [Neisseria meningitidis (VF0454) - Stress survival (VFC0282)]

VFG037822(gb|WP\_000240700) (lpxC) UDP-3-O-acyl-N-acetylglucosamine deacetylase [LPS (VF0466) - Immune modulation (VFC0466)]

VFG038309(gb|WP\_016349344) (exeM) general secretion pathway protein M [Exe T2SS (VF0478) - Effector delivery system (VFC0478)]

VFG038812(gb|WP\_011706645) (cheR-3) chemotaxis protein CheR [Polar flagella (VF0473) - Motility (VFC0204)]

VFG006582(gb|WP\_001862801) (flhF) flagellar biosynthesis protein [Flagella (VF0051) - Motility (VFC0204)]

VFG040665(gb|WP\_011190939) (sca4) cell surface antigen Sca4 [Sca4 (VF0502) - Others (VFC0346)] [Rickettsia typhi (VF0502) - Others (VFC0346)]

VFG038892(gb|WP\_043118302) (aerA/act) Aerolysin A [Aerolysin (VF0481) - Exotoxin (VFC0235)] [Aeromonas hydrophila (VF0481) - Exotoxin (VFC0235)]

VFG049120(gb|WP\_012737535) (allB) allantoinase [Allantoin utilization (VF0572) - Nutritional/Metabolic factors (VFC0572)]

VFG014950(gb|NP\_249457) (mucD) serine protease MucD precursor [Alginate (VF0091) - Biofilm (VFC0271)] [Pseudomonas aeruginosa (VF0091) - Biofilm (VFC0271)]

VFG000204(gb|NP\_250400) (popD) type III secretion system hydrophobic translocator, pore protein PopD [Type III secretion system (VF0221) - Effector delivery system (VFC0221)]

VFG034756 (espL1) Type III secretion system effector espL1 [TTSS secreted effectors (VF1111) - Effector delivery system (VFC1111)]

VFG040507(gb|WP\_011191135) (ompB) outer membrane protein OmpB [ROmpB/Sca5 (VF0493) - Invasion (VFC0493)]

VFG038541(gb|WP\_016350150) (flpD) Flp pilus assembly protein FlpD [Flp type IV pili (VF0476) - Adherence (VFC0476)]

VFG014984(gb|NP\_253136) (algW) AlgW protein [Alginate (VF0091) - Biofilm (VFC0271)] [Pseudomonas aeruginosa (VF0091) - Biofilm (VFC0271)]

VFG001827(gb|WP\_001020414) (senB) enterotoxin [ShET2 (VF0258) - Exotoxin (VFC0235)] [Shigella boydii (VF0258) - Exotoxin (VFC0235)]

VFG001252(gb|NP\_249793) (fliG) flagellar motor switch protein G [Flagella (VF0273) - Motility (VFC0204)] [Bacillus subtilis (VF0273) - Motility (VFC0204)]

VFG048348(gb|WP\_004149658) (mrkJ) phosphodiesterase [Type 3 fimbriae (VF0567) - Biofilm (VFC0271)] [Klebsiella pneumoniae (VF0567) - Biofilm (VFC0271)]

VFG039501(gb|NP\_820443) (coxCC7/cig44) Coxiella Dot/Icm type IVB secretion system translocated effector [Coxiella burnetii (VF0395) - Effector delivery system (VFC0395)]

VFG038760(gb|WP\_016351312) (flrB) two-component sensor kinase [Polar flagella (VF0473) - Motility (VFC0204)]

VFG044327(gb|WP\_000140406) (ybtA) yersiniabactin transcriptional regulator YbtA [Ybt (VF0564) - Nutritional/Physiological (VFC0564)]

VFG001381(gb|YP\_177728) (icl) Isocitrate lyase Icl (isocitrase) (isocitratase) [Isocitrate lyase (VF0253) - Others (VFC0253)]

VFG038403(gb|WP\_011705726) (atsS) Type VI secretion system protein [T6SS (VF0480) - Effector delivery system (VFC0480)]

VFG044326(gb|WP\_001327262) (ybtP) yersiniabactin ABC transporter ATP-binding/permease protein YbtP [Ybt (VF0564) - Nutritional/Physiological (VFC0564)]

VFG048409(gb|WP\_086074289) (entA) 2,3-dihydroxybenzoate-2,3-dehydrogenase [Ent (VF0562) - Nutritional/Physiological (VFC0562)]

VFG001895(gb|YP\_002343528) (flhF) flagellar biosynthesis regulator FlhF [Flagella (VF0114) - Motility (VFC0204)]

VFG000924(gb|WP\_001234311) (fepB) ferrienterobactin ABC transporter periplasmic binding protein [Enterobacteriaceae (VF0221) - Nutritional/Physiological (VFC0221)]

VFG038505(gb|WP\_011705643) (tapF) type IV pilus biogenesis/stability protein, pilW-like [Tap type IV pili (VF0476) - Adherence (VFC0476)]

VFG044325(gb|WP\_002212761) (ybtQ) yersiniabactin ABC transporter ATP-binding/permease protein YbtQ [Ybt (VF0564) - Nutritional/Physiological (VFC0564)]

VFG000879(gb|WP\_000832235) (fimH) FimH protein precursor [Type 1 fimbriae (VF0221) - Adherence (VFC0221)]

VFG050037(gb|WP\_001133943) (dhbF) non-ribosomal peptide synthetase, DhbF [Bacillibactin (VF0586) - Nutritional/Physiological (VFC0586)]

VFG024730(gb|NP\_217462) (pks1) polyketide synthase [PDIM (VF0309) - Immune modulation (VFC0258)] [Mycobacterium tuberculosis (VF0309) - Immune modulation (VFC0258)]

VFG038385(gb|WP\_011705716) (atsI) Type VI secretion system protein [T6SS (VF0480) - Effector delivery system (VFC0480)]

VFG002196(gb|WP\_011109578) (EF3023) polysaccharide lyase, family 8 [Hyaluronidase (VF0359) - Exoenzymes (VFC0359)]

VFG000935(gb|WP\_001222189) (iroN) salmochelin receptor IroN [Salmochelin siderophore (VF0230) - Nutritional/Physiological (VFC0230)]

VFG013374(gb|WP\_005693262) (lpxD) UDP-3-O-(3-hydroxymyristoyl) glucosamine N-acyltransferase [LOS (VF0323) - Immune modulation (VFC0323)]

VFG001229(gb|NP\_249103) (pilK) methyltransferase PilK [Type IV pili (VF0082) - Adherence (VFC0001)] [Ps  
VFG048508(gb|WP\_012737618) (fes) enterobactin/ferric enterobactin esterase [Ent (VF0562) - Nutritional/Meta  
VFG038683(gb|WP\_016350056) (flhA) flagellar biosynthesis protein FlhA [Polar flagella (VF0473) - Motility (V  
VFG000161(gb|NP\_251089) (pvdD) pyoverdine synthetase D [Pyoverdine (VF0094) - Nutritional/Metabolic fact  
VFG002164(gb|WP\_002395058) (prgB/asc10) aggregation substance PrgB/Asc10 [AS (VF0352) - Adherence (V  
VFG044324(gb|WP\_032447693) (ybtX) yersiniabactin-associated zinc MFS transporter YbtX [Ybt (VF0564) - N  
VFG050625(gb|WP\_000389061.1) (pilG) twitching motility response regulator PilG [TFP (VF1334) - Adherence  
VFG038655(gb|WP\_011705279) (fliM) flagellar motor switch protein FliM [Polar flagella (VF0473) - Motility (V  
VFG038663(gb|WP\_005298795) (fliO) flagellar biosynthesis protein, FliO [Polar flagella (VF0473) - Motility (V  
VFG043623(gb|WP\_002916122) (mrkF) type 3 fimbrial minor pilin subunit MrkF [Type 3 fimbriae (VF0567) - I  
VFG005942(gb|WP\_000660895) (GBS\_RS06570) glycosyltransferase [Capsule (VF0274) - Immune modulation  
VFG040422(gb|WP\_011190749) (rvhD4) type IV secretion system component VirD4 [Rvh T4SS (VF0488) - Eff  
VFG050802(gb|WP\_000865310.1) (gspG) general secretion pathway protein G [T2SS (VF1335) - Effector deliv  
VFG045464(gb|WP\_000562556) (tcpC) Tir domain containing protein TcpC [TcpC (VF0413) - Immune modul  
VFG038497(gb|WP\_016351992) (tppF) type IV pilus pseudopilin [Tap type IV pili (VF0475) - Adherence (VFC  
VFG001396(gb|NP\_216424) (katG) catalase-peroxidase [KatG (VF0303) - Stress survival (VFC0282)] [Mycobac  
VFG000933(gb|WP\_001007140) (entB) isochorismatase [Enterobactin (VF0228) - Nutritional/Metabolic factor (V  
VFG050163(gb|WP\_000197083) (neuE) polysialic acid biosynthesis protein [K1 capsule (VF0239) - Invasion (V  
VFG000347(gb|WP\_010869038) (hgpC) hemoglobin-binding protein [Hgp (VF0270) - Nutritional/Metabolic fac  
VFG002154(gb|NP\_219969) (tarp) Type III secretion system translocated actin-recruiting protein [TTSS secreted  
VFG000131(gb|NP\_252239) (algJ) alginate o-acetyltransferase AlgJ [Alginate (VF0091) - Biofilm (VFC0271)] [M  
VFG000362(gb|WP\_002212777) (irp1) yersiniabactin biosynthetic protein Irp1 [Yersiniabactin (VF0136) - Nutri  
VFG000884(gb|WP\_000654937) (papC) usher protein PapC [P fimbriae (VF0220) - Adherence (VFC0001)] [Esc  
VFG050386(gb|WP\_000355489.1) (pilT) type IV pilus twitching motility protein PilT [TFP (VF1334) - Adheren  
VFG034908(gb|WP\_000978349) (espY3) Type III secretion system effector EspY3 [TTSS secreted effectors (VF  
VFG038448(gb|WP\_016351632) (tapN) type IV pilus biogenesis protein PilN [Tap type IV pili (VF0475) - Adhe  
VFG045793(gb|WP\_000771429) (csgA) curlin major subunit CsgA [Curli fibers (VF1138) - Adherence (VFC00  
VFG000165(gb|NP\_252915) (pchF) pyochelin synthetase PchF [Pyochelin (VF0095) - Nutritional/Metabolic fact  
VFG013368(gb|WP\_005693225) (rffG) dTDP-glucose 46-dehydratase [LOS (VF0044) - Immune modulation (V  
VFG049084(gb|WP\_004175264) (rfbB) O-antigen export ABC transporter ATP-binding protein RfbB [LPS (VF  
VFG000873(gb|WP\_000695571) (fimA) Type-1 fimbrial protein, A chain precursor [Type 1 fimbriae (VF0221) -  
VFG037762(gb|WP\_000078878) (lpxL) lauroyl acyltransferase [LPS (VF0466) - Immune modulation (VFC0258  
VFG034928(gb|WP\_001239082) (lifA/efa1) lymphostatin Efa1/LifA [Lymphostatin/LifA (VF0175) - Effector de  
VFG012603(gb|WP\_001302516) (chuT) periplasmic heme-binding protein ChuT [Chu (VF0234) - Nutritional/M  
VFG000227(gb|WP\_002221783) (pilS) pilin [Type IV pili (VF0075) - Adherence (VFC0001)] [Neisseria mening  
VFG043774(gb|AAB24244) (bont) botulinum neurotoxin, BoNT [BoNT (VF0375) - Exotoxin (VFC0235)] [Clos  
VFG002413(gb|WP\_000389022) (ykgK/ecpR) regulator protein EcpR [ECP (VF0404) - Adherence (VFC0001)]  
VFG049155(gb|WP\_000829570) (clbI) colibactin polyketide synthase ClbI [Colibactin (VF0573) - Exotoxin (VF  
VFG013315(gb|WP\_005694490) (lgtF) beta-1,4-glucosyltransferase [LOS (VF0044) - Immune modulation (VFC  
VFG049149(gb|WP\_041169023) (clbC) colibactin polyketide synthase ClbC [Colibactin (VF0573) - Exotoxin (V  
VFG000690(gb|AAP42183) (AAP42183) Bcs3' [Capsule (VF0043) - Immune modulation (VFC0258)] [Haemop  
VFG038413(gb|WP\_043118350) (fimC) outer membrane usher protein [Type I pili (VF0486) - Adherence (VFC  
VFG002148(gb|NP\_220192) (pkn5) serine/threonine protein kinase [TTSS secreted effectors (VF0711) - Effector  
VFG002129(gb|NP\_220075) (CT\_560) hypothetical protein [TTSS (VF0344) - Effector delivery system (VFC00  
VFG033466(gb|WP\_000381567) (espA) Type III secretion system translocator protein EspA [TTSS (VF0172) - I  
VFG000133(gb|NP\_252241) (algA) phosphomannose isomerase / guanosine 5'-diphospho-D-mannose pyrophosph

VFG038317(gb|WP\_016352170) (tapD/pilD) prepilin peptidase [Tap type IV pili (VF0475) - Adherence (VFC000001)]

VFG001242(gb|NP\_249775) (flgI) flagellar P-ring protein precursor FlgI [Flagella (VF0273) - Motility (VFC0204)]

VFG019178(gb|WP\_012291519) (bont) botulinum neurotoxin, BoNT [BoNT (VF0375) - Exotoxin (VFC0235)]

VFG000833(gb|WP\_001301460) (espG) Type III secretion system effector EspG, GTPase activating protein [Type III secretion system (VF0229) - Adherence (VFC0001)]

VFG012609(gb|WP\_000993317) (chuW) Putative oxygen independent coproporphyrinogen III oxidase [Chu (VF0227) - Nutritional/Metabolic factor (VFC0001)]

VFG000139(gb|NP\_253697) (waaG) B-band O-antigen polymerase [LPS (VF0085) - Immune modulation (VFC0001)]

VFG050160(gb|WP\_000030755) (kpsU) 3-deoxy-manno-octulosonate cytidyltransferase [K1 capsule (VF0239) - Invasion (VFC0083)]

VFG048621(gb|WP\_004213924) (iutA) ferric aerobactin receptor IutA [Aerobactin (VF0565) - Nutritional/Metabolic factor (VFC0001)]

VFG049916(gb|WP\_000103365) (vgrG/tssI) type VI secretion system effector VgrG [T6SS (VF0579) - Effector delivery (VFC0001)]

VFG000112(gb|NP\_253216) (pilB) type 4 fimbrial biogenesis protein PilB [Type IV pili (VF0082) - Adherence (VFC0001)]

VFG038867(gb|WP\_005314284) (fliI) lateral flagellar FliI-like assembly ATPase [Lateral flagella (VF0474) - Motility (VFC0204)]

VFG038460(gb|WP\_043119325) (tapQ) type IV pilus secretin PilQ [Tap type IV pili (VF0475) - Adherence (VFC0001)]

VFG002437(gb|WP\_011325557) (boaB) autotransporter protein [BoaB (VF0435) - Adherence (VFC0001)] [Burkholderia pseudomallei (VF0435) - Adherence (VFC0001)]

VFG038421(gb|WP\_043118352) (fimE) fimbrial protein [Type I pili (VF0486) - Adherence (VFC0001)] [Aeromonas hydrophila (VF0486) - Adherence (VFC0001)]

VFG002076(gb|NP\_248780) (clpV1) type VI secretion system AAA+ family ATPase [HSI-I (VF0334) - Effector delivery (VFC0001)]

VFG000157(gb|NP\_249535) (plcH) hemolytic phospholipase C precursor [PLC (VF0092) - Exotoxin (VFC0235)]

VFG013647(gb|WP\_041175806) (invC/ilp) intimin-like invasin C protein [Invasin C/Ilp (VF0575) - Invasion (VFC0083)]

VFG034679(gb|WP\_000074207) (ibeB) Cu(+)/Ag(+) efflux RND transporter outer membrane channel CusC [Iberin (VF0575) - Invasion (VFC0083)]

VFG037176(gb|WP\_001081735) (plc1) phospholipase C [Phospholipase C (VF0470) - Exotoxin (VFC0235)] [Aeromonas hydrophila (VF0470) - Exotoxin (VFC0235)]

VFG051042(gb|WP\_000653195.1) (hcp/tssD) type VI secretion system tube protein Hcp [T6SS (VF1337) - Effector delivery (VFC0001)]

VFG038635(gb|WP\_016350051) (fliH) flagellar assembly protein FliH [Polar flagella (VF0473) - Motility (VFC0204)]

VFG001935(gb|YP\_002344312) (ciaB) invasion antigen CiaB [CiaB (VF0324) - Invasion (VFC0083)] [Campylobacter jejuni (VF0324) - Invasion (VFC0083)]

VFG038359(gb|WP\_005321607) (aopH) Type III secretion system effector AopH, putative tyrosine phosphatase [Type III secretion system (VF0229) - Adherence (VFC0001)]

VFG000478(gb|NP\_459678) (fur) ferric iron uptake transcriptional regulator [Fur (VF0113) - Regulation (VFC0001)]

VFG002176(gb|AAM75252) (cylB) ABC-type transporter [Cytolysin (VF0356) - Exotoxin (VFC0235)] [Enterococcus faecalis (VF0356) - Exotoxin (VFC0235)]

VFG048665(gb|WP\_004176431) (dotU/tssL) type VI secretion system protein, DotU/TssL family [T6SS (VF0566) - Effector delivery (VFC0001)]

VFG050159(gb|WP\_001331697) (kpsD) Polysialic acid transport protein precursor [K1 capsule (VF0239) - Invasion (VFC0083)]

VFG049157(gb|WP\_014907259) (clbK) colibactin hybrid non-ribosomal peptide synthetase/type I polyketide synthase [Colibactin (VF0567) - Exotoxin (VFC0235)]

VFG001443(gb|AAF37887) (ompA) outer membrane protein A [OmpA (VF0236) - Invasion (VFC0083)] [Escherichia coli (VF0236) - Invasion (VFC0083)]

VFG000936(gb|WP\_016265865) (iutA) ferric aerobactin receptor precursor IutA [Aerobactin (VF0229) - Nutritional/Metabolic factor (VFC0001)]

VFG005486(gb|WP\_000417180) (iga) G5 domain-containing protein [IgA1 protease (VF0147) - Immune modulation (VFC0001)]

VFG050946(gb|WP\_000083625.1) (tssL) type IVB secretion system protein TssL [T6SS (VF1337) - Effector delivery (VFC0001)]

VFG002321(gb|WP\_011816589) (fliC) flagellin [Flagella (VF0394) - Motility (VFC0204)] [Yersinia enterocolitica (VF0394) - Motility (VFC0204)]

VFG044323(gb|WP\_015874960) (ybtS) yersiniabactin biosynthesis salicylate synthase YbtS [Ybt (VF0564) - Nutritional/Metabolic factor (VFC0001)]

VFG038587(gb|WP\_016349160) (mshG) MSHA (mannose-sensitive hemagglutinin) pili biogenesis protein MshG [Type IV pili (VF0475) - Adherence (VFC0001)]

VFG034612(gb|WP\_000225871) (cfaA) colonisation factor antigen a, chaperone [Adhesive fimbriae (VF0213) - Adherence (VFC0001)]

VFG000916(gb|WP\_001017192) (chuS) heme oxygenase ChuS [Chu (VF0227) - Nutritional/Metabolic factor (VFC0001)]

VFG045790(gb|WP\_000833288) (cgsE) curli production assembly/transport protein CsgE [Curli fibers (VF1138) - Adherence (VFC0001)]

VFG038699(gb|WP\_010634617) (cheY) chemotaxis protein CheY [Polar flagella (VF0473) - Motility (VFC0204)]

VFG048317(gb|WP\_014906959) (fimK) transcriptional regulator [Type I fimbriae (VF0566) - Adherence (VFC0001)]

VFG038464(gb|WP\_011707389) (tapT) twitching ATPase [Tap type IV pili (VF0475) - Adherence (VFC0001)]

VFG043624(gb|WP\_004149659) (mrkD) fimbrial adhesin protein precursor MrkD [Type 3 fimbriae (VF0567) - Adherence (VFC0001)]

VFG038578(gb|WP\_016349163) (mshA) prepilin-type N-terminal cleavage/methylation domain-containing protein [Type IV pili (VF0475) - Adherence (VFC0001)]

VFG000912(gb|WP\_001443207) (focD) F1C fimbrial usher [F1C fimbriae (VF0224) - Adherence (VFC0001)] [Yersinia enterocolitica (VF0224) - Adherence (VFC0001)]

VFG037330(gb|WP\_001177743) (basD) acinetobactin biosynthesis protein BasD [Acinetobactin (VF0467) - Nutritional/Metabolic factor (VFC0001)]

VFG038293(gb|WP\_016349340) (exel) general secretion pathway protein I [Exe T2SS (VF0478) - Effector delivery (VFC0001)]



VFG038176(gb|WP\_000777882) (*ompA*) outer membrane protein OmpA [OmpA (VF0464) - Immune modulation (VFC0204)]

VFG001892(gb|YP\_002343523) (*fliY*) flagellar motor switch protein FliY [Flagella (VF0114) - Motility (VFC0204)]

VFG001267(gb|NP\_252913) (*pchH*) ABC transporter ATP-binding protein [Pyochelin (VF0095) - Nutritional/Metabolic factor (VFC0272)]

VFG048654(gb|WP\_004224345) (*vasE/tssK*) type VI secretion system baseplate subunit TssK [T6SS (VF0569) - Effector delivery system (VFC0001)]

VFG001405(gb|NP\_217219) (*sigA/rpoV*) RNA polymerase sigma factor SigA [SigA (VF0257) - Regulation (VF0001)]

VFG038501(gb|WP\_043119142) (*tapV*) type IV pilus assembly protein TapV [Tap type IV pili (VF0475) - Adherence (VFC0001)]

VFG002051(gb|WP\_001115126) (*gspH*) general secretion pathway protein H [T2SS (VF0333) - Effector delivery system (VFC0001)]

VFG000889(gb|WP\_000113351) (*papF*) P pilus minor subunit PapF [P fimbriae (VF0220) - Adherence (VFC0001)]

VFG041251(gb|WP\_010946186) (*ceg14/sidL*) Dot/Icm type IV secretion system effector Ceg14/SidL [Dot/Icm Type IV secretion system (VF0220)]

VFG043015(gb|NP\_250150) (*PA1459*) chemotaxis-specific methyltransferase [Flagella (VF0273) - Motility (VFC0204)]

VFG048980(gb|WP\_041937790) (*KP1\_RS17345*) capsule assembly Wzi family protein [Capsule (VF0560) - Immune modulation (VFC0001)]

VFG037777(gb|WP\_000867091) (*lpsB*) glycosyltransferase family 4 protein [LPS (VF0466) - Immune modulation (VFC0001)]

VFG001846(gb|WP\_010946208) (*icmH/dotU*) Dot/Icm type IV secretion system protein IcmH/DotU [Dot/Icm Type IV secretion system (VF0220)]

VFG000874(gb|WP\_000824100) (*fimI*) Fimbrin-like protein fimI precursor [Type 1 fimbriae (VF0221) - Adherence (VFC0001)]

VFG000172(gb|NP\_252898) (*phzM*) phenazine-specific methyltransferase PhzM (adenosylmethionine dependent) [Phenazine (VF0221) - Nutritional/Metabolic factor (VFC0001)]

VFG050313(gb|WP\_004644147.1) (*pilM*) pilus assembly protein PilM [TFP (VF1334) - Adherence (VFC0001)]

VFG038436(gb|WP\_016352169) (*tapC*) type IV fimbrial assembly protein, PilC-like [Tap type IV pili (VF0475) - Adherence (VFC0001)]

VFG048297(gb|WP\_014906961) (*fimG*) type 1 fimbrial minor component [Type I fimbriae (VF0566) - Adherence (VFC0001)]

VFG043627(gb|WP\_000756959) (*mrkA*) type 3 fimbrial major pilin subunit MrkA [Type 3 fimbriae (VF0567) - Adherence (VFC0001)]

VFG038667(gb|WP\_016350054) (*fliP*) flagellar biosynthesis protein FliP [Polar flagella (VF0473) - Motility (VFC0204)]

VFG034721(gb|WP\_000556298) (*ibeC*) phosphoethanolamine transferase CptA [Ibes (VF0237) - Invasion (VFC0001)]

VFG041020(gb|NP\_250353) (*PA1662*) ClpA/B-type protease [HSI-2 (VF0943) - Effector delivery system (VFC0001)]

VFG034810(gb|NP\_309848) (*espO1-2*) type III secreted effector [TTSS secreted effectors (VF1110) - Effector delivery system (VFC0001)]

VFG002352(gb|WP\_005168790) (*flgA*) periplasmic flagellar chaperone protein FlgA required for P-ring assembly [Flagella (VF0394) - Motility (VFC0204)]

VFG051070(gb|WP\_001066523.1) (*tssC*) type VI secretion system contractile sheath large subunit [T6SS (VF1337) - Effector delivery system (VFC0001)]

VFG043213(gb|WP\_005164494) (*motA*) flagellar motor protein MotA [Flagella (VF0394) - Motility (VFC0204)]

VFG048779(gb|WP\_004190503) (*tssG*) type VI secretion system baseplate subunit TssG [T6SS (VF0569) - Effector delivery system (VFC0001)]

VFG013063(gb|WP\_001017208) (*shuS*) heme/hemoglobin transport protein ShuS [Shu (VF0256) - Nutritional/Metabolic factor (VFC0001)]

VFG037792(gb|WP\_000064875) (*lpxA*) acyl-ACP--UDP-N-acetylglucosamine O-acyltransferase [LPS (VF0466) - Immune modulation (VFC0001)]

VFG048787(gb|WP\_004176417) (*sciN/tssJ*) type VI secretion system lipoprotein TssJ [T6SS (VF0569) - Effector delivery system (VFC0001)]

VFG048518(gb|WP\_012737617) (*fepA*) outer membrane receptor FepA [Ent (VF0562) - Nutritional/Metabolic factor (VFC0001)]

VFG000036(gb|WP\_010929614) (*bplC*) lipopolysaccharide biosynthesis protein [LPS (VF0033) - Immune modulation (VFC0001)]

VFG043626(gb|WP\_000820818) (*mrkB*) fimbrial chaperone protein mrkB precursor [Type 3 fimbriae (VF0567) - Adherence (VFC0001)]

VFG001857(gb|WP\_010946483) (*iraB*) Di/tripeptide permease [IraAB (VF0293) - Nutritional/Metabolic factor (VFC0001)]

VFG038378(gb|WP\_011705712) (*vipA*) Type VI secretion system contractile sheath small subunit TssB/VipA [T6SS (VF1337) - Effector delivery system (VFC0001)]

VFG049118(gb|WP\_012737529) (*allR*) DNA-binding transcriptional repressor AllR [Allantoin utilization (VF0562) - Nutritional/Metabolic factor (VFC0001)]

VFG002074(gb|NP\_248778) (*hsiG1/tssF*) type VI secretion system hcp secretion island protein HsiG1 [HSI-I (VF0562) - Nutritional/Metabolic factor (VFC0001)]

VFG000065(gb|WP\_010930832) (*bscD*) putative type III secretion protein [TTSS (VF0035) - Effector delivery system (VFC0001)]

VFG049040(gb|WP\_074160401) (*KP1\_RS17225*) glycosyltransferase family 4 protein [LPS (VF0561) - Immune modulation (VFC0001)]

VFG044336(gb|WP\_050767835) (*iroC*) ABC transporter [Sal (VF0563) - Nutritional/Metabolic factor (VFC0272)]

VFG006587(gb|WP\_000602430) (*fliA*) flagellar biosynthesis sigma factor FliA [Flagella (VF0051) - Motility (VFC0204)]

VFG042978(gb|WP\_011109477) (*ebpC*) endocarditis and biofilm-associated pilus major subunit EbpC [Ebp pili (VF0475) - Adherence (VFC0001)]

VFG038639(gb|WP\_011705275) (*fliI*) flagellum-specific ATP synthase [Polar flagella (VF0473) - Motility (VFC0204)]

VFG050972(gb|WP\_000972583.1) (*tagX*) type VI-associated gene X, peptidoglycan hydrolase [T6SS (VF1337) - Effector delivery system (VFC0001)]

VFG038659(gb|WP\_011705280) (*fliN*) flagellar motor switch protein FliN [Polar flagella (VF0473) - Motility (VFC0204)]

VFG038285(gb|WP\_005308483) (*exeG*) general secretion pathway protein G [Exe T2SS (VF0478) - Effector delivery system (VFC0001)]

VFG002224(gb|WP\_002963682) (wbkA) mannosyltransferase [LPS (VF0367) - Immune modulation (VFC0258)]

VFG038346(gb|WP\_005320760) (acr1) Type III secretion system gatekeeper subunit [T3SS (VF0479) - Effector

VFG001392(gb|NP\_215737) (sigE) ECF RNA polymerase sigma factor SigE [SigE (VF0295) - Regulation (VFC

VFG034636(gb|WP\_000358674) (cfaC) colonisation factor antigen c, usher [Adhesive fimbriae (VF0213) - Adhe

VFG002056 (gspM) general secretion pathway protein M [T2SS (VF0333) - Effector delivery system (VFC0086

VFG022146(gb|NP\_214805) (mycP3) Type VII secretion system membrane-anchored mycosin MycP3 [ESX-3 (

VFG000917(gb|WP\_000089583) (chuA) Outer membrane heme/hemoglobin receptor ChuA [Chu (VF0227) - Nu

VFG002173(gb|WP\_010785625) (asa1) aggregation substance Asa1 [AS (VF0352) - Adherence (VFC0001)] [Er

VFG038549(gb|WP\_016350148) (flpB) Flp pilus assembly protein [Flp type IV pili (VF0476) - Adherence (VFC

VFG000890(gb|WP\_000758683) (papG) P pilus tip adhesin PapG [P fimbriae (VF0220) - Adherence (VFC0001)

VFG038772(gb|WP\_016351319) (flgK) flagellar hook-associated protein FlgK [Polar flagella (VF0473) - Motilit

VFG001915(gb|YP\_002344227) (fliP) flagellar biosynthesis protein FliP [Flagella (VF0114) - Motility (VFC020

VFG000333(gb|WP\_005694147) (lic2A) glycosyltransferase [LOS (VF0044) - Immune modulation (VFC0258)]

VFG000426(gb|WP\_001023498) (vexB) Vi polysaccharide export inner-membrane protein (ABC-2 type transpor

VFG000267(gb|WP\_002225846) (hpuA) haemoglobin-haptoglobin-utilization protein [HpuAB (VF0049) - Nutri

VFG002046(gb|WP\_000135089) (gspC) general secretion pathway protein C [T2SS (VF0333) - Effector delivery

VFG002034(gb|WP\_010874808) (hmw3) cytadherence accessory protein HMW3 [Cytadherence organelle (VF0

VFG015045(gb|NP\_249821) (rhlC) rhamnosyltransferase 2 [Rhamnolipid (VF0089) - Immune modulation (VFC

VFG006717(gb|NP\_465159) (lap) Listeria adhesion protein Lap [Lap (VF0444) - Adherence (VFC0001)] [Lister

VFG038882(gb|WP\_005314247) (maf-5) modification accessory factor [Lateral flagella (VF0474) - Motility (VF

VFG038297(gb|WP\_016349341) (exeJ) general secretion pathway protein J [Exe T2SS (VF0478) - Effector deliv

VFG000010(gb|WP\_010930243) (tcfA) tracheal colonization factor precursor [TcfA (VF0032) - Adherence (VFC

VFG000140(gb|NP\_253696) (waaP) UDP-glucose:(heptosyl) LPS alpha 1,3-glucosyltransferase WaaG [LPS (VF

VFG038756(gb|WP\_011706626) (flrC) transcriptional activator [Polar flagella (VF0473) - Motility (VFC0204)]

VFG038840(gb|WP\_005300916) (flmH) short chain dehydrogenase/reductase family oxidoreductase [Polar flage

VFG001226(gb|NP\_249100) (pilH) twitching motility protein PilH [Type IV pili (VF0082) - Adherence (VFC00

VFG038874(gb|WP\_005314263) (flgE) flagellar hook protein FlgE [Lateral flagella (VF0474) - Motility (VFC02

VFG038383(gb|WP\_011705715) (atsH) Type VI secretion system protein [T6SS (VF0480) - Effector delivery sy

VFG038780(gb|WP\_011706637) (flgI) flagellar basal body P-ring protein [Polar flagella (VF0473) - Motility (VF

VFG050157(gb|WP\_001331698) (kpsF) Polysialic acid capsule expression protein [K1 capsule (VF0239) - Invas

VFG001391(gb|NP\_215677) (narG) nitrate reductase subunit alpha [Nitrate reductase (VF0302) - Nutritional/Me

VFG037513(gb|WP\_085947930) (ACICU\_RS04590) porin family protein [HemO cluster (VF0636) - Nutritional

VFG038804(gb|WP\_011706643) (flgC) flagellar basal body rod protein FlgC [Polar flagella (VF0473) - Motility

VFG038265(gb|WP\_016352108) (exeB) general secretion pathway protein B [Exe T2SS (VF0478) - Effector del

VFG049152(gb|WP\_000337350) (clbF) colibactin biosynthesis dehydrogenase ClbF [Colibactin (VF0573) - Exo

VFG038561(gb|WP\_016349168) (mshQ) MSHA (mannose-sensitive hemagglutinin) pili biogenesis protein Msh

VFG007832(gb|NP\_217448) (ppsB) phthiocerol synthesis polyketide synthase type I PpsB [PDIM (VF0309) - Im

VFG043500(gb|WP\_011206108) (mhp271) p97 cilium adhesin paralog [P97/P102 paralog family (VF0426) - Ad

VFG049843(gb|WP\_003155066) (exlB) hemolysin activator protein [Exolysin (VF0582) - Effector delivery syste

VFG000940(gb|WP\_001299620) (iucA) aerobactin siderophore biosynthesis protein IucD [Aerobactin (VF0229)

VFG049144(gb|WP\_002892069) (acrB) acriflavine resistance protein B [AcrAB (VF0568) - Antimicrobial activi

VFG000477(gb|NP\_461845) (rpoS) RNA polymerase sigma factor RpoS [RpoS (VF0112) - Regulation (VFC030

VFG039436 (CBU\_1107\*) Coxiella Dot/Icm type IVB secretion system translocated effector [T4SS secreted effe

VFG041038(gb|NP\_251056) (PA2366) uricase [HSI-3 (VF0944) - Effector delivery system (VFC0086)] [Pseudo

VFG048257(gb|WP\_004174507) (fimI) type 1 pilus biosynthesis fimbrial protein [Type I fimbriae (VF0566) - Ac

VFG038800(gb|WP\_016351322) (flgD) flagellar hook capping protein [Polar flagella (VF0473) - Motility (VFC

VFG000294(gb|WP\_000938081) (*cagQ*) type IV secretion system protein Cag14/CagQ [Type IV secretion system (VF0458) - Adherence (VFC0001)]

VFG049148(gb|WP\_041168941) (*clbB*) colibactin hybrid non-ribosomal peptide synthetase/type I polyketide synthase [Colibactin (VF0375) - Exotoxin (VFC0235)]

VFG019180(gb|WP\_011987710) (*bont*) botulinum neurotoxin, BoNT [BoNT (VF0375) - Exotoxin (VFC0235)]

VFG043209(gb|WP\_005168769) (*cheD*) methyl-accepting chemotaxis protein CheD [Flagella (VF0394) - Motility (VFC0001)]

VFG042858(gb|WP\_003018618) (*pilN*) Type IV pilus associated protein [Type IV pili (VF0458) - Adherence (VFC0001)]

VFG038776(gb|WP\_016351320) (*flgJ*) flagellar rod assembly protein/muramidase FlgJ [Polar flagella (VF0473) - Motility (VFC0001)]

VFG001230(gb|NP\_251805) (*fimV*) a polar peptidoglycan-binding protein involved in type IV pilus assembly [Type IV pili (VF0458) - Adherence (VFC0001)]

VFG038784(gb|WP\_011706638) (*flgH*) flagellar basal body L-ring protein [Polar flagella (VF0473) - Motility (VFC0001)]

VFG041329(gb|WP\_010948104) (*legL7*) Dot/Icm type IV secretion system effector LegL7 [Dot/Icm T4SS secretion system (VF0458) - Adherence (VFC0001)]

VFG048338(gb|WP\_002916079) (*mrkI*) LuxR family regulatory protein [Type 3 fimbriae (VF0567) - Biofilm (VFC0001)]

VFG049133(gb|WP\_004177236) (*acrA*) acriflavine resistance protein A [AcrAB (VF0568) - Antimicrobial activity (VFC0001)]

VFG038407(gb|WP\_011705728) (*vgrG3*) VgrG protein [T6SS (VF0480) - Effector delivery system (VFC0086)]

VFG050168(gb|WP\_000590258) (*kpsT*) Polysialic acid transport ATP-binding protein [K1 capsule (VF0239) - Invasion (VFC0001)]

VFG049095(gb|WP\_002912373) (*rfbA*) O-antigen export ABC transporter permease RfbA [LPS (VF0561) - Immune modulation (VFC0258)]

VFG044332(gb|WP\_015874967) (*ybtE*) yersiniabactin biosynthesis salycil-AMP ligase YbtE [Ybt (VF0564) - Nutritional/Metabolic factor (VFC0001)]

VFG001810(gb|YP\_178017) (*fbpD*) MPT51/MPB51 antigen [Antigen 85 (VF0311) - Adherence (VFC0001)] [MPT51/MPB51 (VF0311) - Adherence (VFC0001)]

VFG000064(gb|WP\_010930831) (*bcrD*) Type III secretion system LcrD homolog protein BcrD [TTSS (VF0035) - Invasion (VFC0001)]

VFG032992(gb|NP\_464816) (*oatA*) peptidoglycan O-acetyltransferase [OatA (VF0441) - Immune modulation (VFC0258)]

VFG038845(gb|WP\_016351249) (*nueA*) NeuA protein [Polar flagella (VF0473) - Motility (VFC0204)] [Aeromonas hydrophila (VF0473) - Motility (VFC0204)]

VFG038533(gb|WP\_016350152) (*flpF*) traffic ATPase [Flp type IV pili (VF0476) - Adherence (VFC0001)] [Aeromonas hydrophila (VF0476) - Adherence (VFC0001)]

VFG048708(gb|WP\_041168969) (*vgrG/tssI*) type VI secretion system tip protein VgrG [T6SS (VF0569) - Effector delivery system (VFC0086)]

VFG038355(gb|WP\_005320739) (*ascU*) Type III secretion system inner membrane export apparatus protein AscU [TTSS (VF0035) - Invasion (VFC0001)]

VFG038572(gb|WP\_016349165) (*mshD*) MSHA (mannose-sensitive hemagglutinin) pili minor prepilin protein MshD [Polar flagella (VF0473) - Motility (VFC0001)]

VFG039131(gb|NP\_820609) (*icmE/dotG*) Type IVB secretion system protein IcmE/DotG, inner membrane protein [Type IVB secretion system (VF0458) - Adherence (VFC0001)]

VFG000927(gb|WP\_000096764) (*fepE*) LPS O-antigen length regulator [Enterobactin (VF0228) - Nutritional/Metabolic factor (VFC0001)]

VFG050772(gb|WP\_001020922.1) (*gspE2*) putative secretion pathway ATPase [T2SS (VF1335) - Effector delivery system (VFC0086)]

VFG034875(gb|WP\_001270087) (*espX5*) Type III secretion system effector EspX5 [TTSS secreted effectors (VF0035) - Invasion (VFC0001)]

VFG045791(gb|WP\_000481500) (*cgsD*) transcriptional regulator CsgD [Curli fibers (VF1138) - Adherence (VFC0001)]

VFG038352(gb|WP\_005320745) (*ascR*) Type III secretion system inner membrane export apparatus protein AscR [TTSS (VF0035) - Invasion (VFC0001)]

VFG006217 (*opa*) outer membrane beta-barrel protein [Opa (VF0076) - Invasion (VFC0083)] [Neisseria meningitidis (VF0076) - Invasion (VFC0083)]

VFG038401(gb|WP\_011705724) (*atsQ*) Type VI secretion system protein [T6SS (VF0480) - Effector delivery system (VFC0086)]

VFG038836(gb|WP\_011707085) (*pomA2*) chemotaxis protein PomA [Polar flagella (VF0473) - Motility (VFC0001)]

VFG049898(gb|WP\_001284199) (*hcp1/tssD1*) type VI secretion system protein, Hcp family [T6SS (VF0579) - Effector delivery system (VFC0086)]

VFG038631(gb|WP\_011705273) (*fliG*) flagellar motor switch protein G [Polar flagella (VF0473) - Motility (VFC0001)]

VFG049899(gb|WP\_001087735) (*tssA*) Type VI secretion system protein TssA [T6SS (VF0579) - Effector delivery system (VFC0086)]

VFG038313(gb|WP\_043118380) (*exeN*) general secretion pathway protein N [Exe T2SS (VF0478) - Effector delivery system (VFC0086)]

VFG001939(gb|YP\_002344531) (*Cj1138*) glycosyltransferase [LOS (VF0326) - Immune modulation (VFC0258)]

VFG000180(gb|NP\_251791) (*xcpT*) general secretion pathway protein G [Xcp secretion system (VF0084) - Effector delivery system (VFC0086)]

VFG038792(gb|WP\_011706640) (*flgF*) flagellar basal-body rod protein FlgF [Polar flagella (VF0473) - Motility (VFC0001)]

VFG044335(gb|WP\_015874980) (*iroB*) glucosyltransferase IroB [Sal (VF0563) - Nutritional/Metabolic factor (VFC0001)]

VFG001862(gb|WP\_015444101) (*katB*) catalase-peroxidase KatB [KatAB (VF0168) - Stress survival (VFC0282)]

VFG013487(gb|WP\_005694185) (*lsgE*) glycosyltransferase [LOS (VF0044) - Immune modulation (VFC0258)] [LOS (VF0044) - Immune modulation (VFC0258)]

VFG044322(gb|WP\_004190148) (*iroE*) siderophore esterase IroE [Sal (VF0563) - Nutritional/Metabolic factor (VFC0001)]

VFG012095(gb|WP\_003435012) (*groEL*) chaperonin GroEL [GroEL (VF0594) - Adherence (VFC0001)] [Clostridium difficile (VF0594) - Adherence (VFC0001)]

VFG000038(gb|WP\_003807115) (*bplA*) probable oxidoreductase [LPS (VF0033) - Immune modulation (VFC0258)]

VFG000934(gb|WP\_000348393) (*entA*) 2,3-dihydro-2,3-dihydroxybenzoate dehydrogenase EntA [Enterobactin (VF0228) - Nutritional/Metabolic factor (VFC0001)]

VFG038865(gb|WP\_005314289) (fliG) flagellar motor switch protein G [Lateral flagella (VF0474) - Motility (VF0474)]

VFG002182(gb|WP\_002376666) (cpsI) UDP-galactopyranose mutase [Capsule (VF0361) - Immune modulation (VF0361)]

VFG048419(gb|WP\_004210873) (entB) 2,3-dihydro-2,3-dihydroxybenzoate synthetase, isochroismatase [Ent (VF0484) - Nutritional/Metabolic factor (VF0484)]

VFG049018(gb|WP\_002913007) (rcsB) transcriptional regulator RcsB [RcsAB (VF0571) - Regulation (VFC030)]

VFG002508(gb|WP\_004525899) (flgB) flagellar basal-body rod protein FlgB [Flagella (VF0430) - Motility (VFC020)]

VFG000198(gb|NP\_250394) (pcrD) type III secretion system protein PcrD [TTSS (VF0083) - Effector delivery system (VF0083)]

VFG038375(gb|WP\_011705710) (atsC) Type VI secretion system protein [T6SS (VF0480) - Effector delivery system (VF0480)]

VFG002521(gb|WP\_004525693) (flhF) flagellar biosynthesis regulator FlhF [Flagella (VF0430) - Motility (VFC020)]

VFG000266(gb|WP\_002222141) (hmbR) hemoglobin receptor [HmbR (VF0048) - Nutritional/Metabolic factor (VF0048)]

VFG000938(gb|WP\_001015709) (iucC) aerobactin siderophore biosynthesis protein IucC [Aerobactin (VF0229) - Nutritional/Metabolic factor (VF0229)]

VFG041019(gb|NP\_250352) (PA1661) hypothetical protein [HSI-2 (VF0943) - Effector delivery system (VFC000)]

VFG038828(gb|WP\_011706649) (flgN) flagellar protein FlgN [Polar flagella (VF0473) - Motility (VFC0204)] [A

VFG037414(gb|WP\_012391956) (bauD) ferric siderophore ABC transporter, permease protein BauD [Acinetobacter (VF0374) - Nutritional/Metabolic factor (VF0374)]

VFG048439(gb|WP\_014907941) (entC) isochorismate synthase [Ent (VF0562) - Nutritional/Metabolic factor (VF0562)]

VFG048808(gb|WP\_004899416) (rfbK1) O9 family phosphomannomutase RfbK1 [Capsule (VF0560) - Immune modulation (VF0560)]

VFG000862(gb|WP\_014639426) (pet) Pet serine protease precursor, autotransporter [Pet (VF0217) - Effector delivery system (VF0217)]

VFG034849(gb|WP\_000129338) (espX1) Type III secretion system effector EspX1 [TTSS secreted effectors (VF0348) - Effector delivery system (VF0348)]

VFG045530(gb|WP\_010947381) (LPG\_RS08285) Dot/Icm type IV secretion system effector [Dot/Icm T4SS secreted effectors (VF0455) - Effector delivery system (VF0455)]

VFG000906(gb|WP\_001142375) (hlyA) Hemolysin A [-Hemolysin (VF0225) - Exotoxin (VFC0235)] [Escherichia coli (VF0225) - Exotoxin (VFC0235)]

VFG001239(gb|NP\_249772) (flgF) flagellar basal-body rod protein FlgF [Flagella (VF0273) - Motility (VFC020)]

VFG050567(gb|WP\_000768964.1) (pilY1) VWA domain-containing protein [TFP (VF1334) - Adherence (VFC000)]

VFG000834(gb|WP\_000823897) (rorf1) SdiA-regulated domain-containing protein [TTSS (VF0191) - Effector delivery system (VF0191)]

VFG010745(gb|WP\_010946125) (sdhA) Dot/Icm type IV secretion system effector SdhA [Dot/Icm T4SS secreted effectors (VF0107) - Effector delivery system (VF0107)]

VFG044469(gb|WP\_011106485) (VP\_RS21635) putative type III secretion system protein [T3SS2 (VF0409) - Effector delivery system (VF0409)]

VFG049160(gb|WP\_001327259) (clbN) colibactin non-ribosomal peptide synthetase ClbN [Colibactin (VF0573) - Exotoxin (VF0573)]

VFG039106(gb|NP\_820604) (icmB/dotO) Type IVB secretion system protein IcmB [Dot/Icm T4SS (VF0503) - Effector delivery system (VF0503)]

VFG050161(gb|WP\_000579525) (kpsC) Capsule polysaccharide export protein [K1 capsule (VF0239) - Invasion (VF0239)]

VFG038452(gb|WP\_016351631) (tapO) type IV pilus biogenesis protein PilO [Tap type IV pili (VF0475) - Adherence (VF0475)]

VFG041018(gb|NP\_250351) (PA1660) hypothetical protein [HSI-2 (VF0943) - Effector delivery system (VFC000)]

VFG038365(gb|WP\_011705044) (hcp1) HcpA-like protein [T6SS (VF0480) - Effector delivery system (VFC008)]

VFG045520(gb|WP\_010947043) (legC1) Dot/Icm type IV secretion system effector LegC1 [Dot/Icm T4SS secreted effectors (VF0455) - Effector delivery system (VF0455)]

VFG049159(gb|WP\_014907260) (clbM) precolibactin export MATE transporter ClbM [Colibactin (VF0573) - Exotoxin (VF0573)]

VFG045626(gb|WP\_014748741) (scm) collagen adhesin protein Scm [Scm (VF0418) - Adherence (VFC0001)] [Pseudomonas (VF0418) - Adherence (VFC0001)]

VFG041043(gb|NP\_251061) (PA2371) ClpA/B-type protease [HSI-3 (VF0944) - Effector delivery system (VFC000)]

VFG048697(gb|WP\_015874721) (clpV/tssH) type VI secretion system ATPase TssH [T6SS (VF0569) - Effector delivery system (VF0569)]

VFG044081(gb|NP\_250946) (pvcC) paerucumarin biosynthesis protein PvcC [Pyoverdine (VF0094) - Nutritional/Metabolic factor (VF0094)]

VFG050470(gb|WP\_000279216.1) (pilC) type II secretion system F family protein [TFP (VF1334) - Adherence (VFC000)]

VFG035909(gb|WP\_001216023) (aatA) outer membrane protein AatA [Dispersin (VF0215) - Others (VFC0346)]

VFG001916(gb|YP\_002344282) (flhA) flagellar biosynthesis protein FlhA [Flagella (VF0114) - Motility (VFC020)]

VFG038144(gb|WP\_001062908) (galE) UDP-glucose 4-epimerase GalE [Capsule (VF0465) - Immune modulation (VF0465)]

VFG049158(gb|WP\_001297937) (clbL) colibactin biosynthesis amidase ClbL [Colibactin (VF0573) - Exotoxin (VF0573)]

VFG000922(gb|WP\_000910402) (chuU) heme permease protein ChuU [Chu (VF0227) - Nutritional/Metabolic factor (VF0227)]

VFG049917(gb|WP\_000508696) (rhs/PAAR) Type VI secretion system protein, PAAR family [T6SS (VF0579) - Effector delivery system (VF0579)]

VFG001238(gb|NP\_249771) (flgE) flagellar hook protein FlgE [Flagella (VF0273) - Motility (VFC0204)] [Pseudomonas (VF0273) - Motility (VFC0204)]

VFG012501(gb|WP\_000271272) (iroE) esterase [Salmochelin siderophore (VF0230) - Nutritional/Metabolic factor (VF0230)]

VFG050162(gb|WP\_001161829) (kpsS) Capsule polysaccharide export protein [K1 capsule (VF0239) - Invasion (VF0239)]

VFG001257(gb|NP\_250135) (fliN) flagellar motor switch protein FliN [Flagella (VF0273) - Motility (VFC0204)]

VFG002443(gb|WP\_004528812) (bopE) Type III secretion system secreted effector, G-nucleotide exchange factor [Type III secretion system (VF0273) - Motility (VFC0204)]

VFG038357(gb|WP\_005320736) (sycX) hypothetical protein [T3SS (VF0479) - Effector delivery system (VFC0001)]

VFG002069(gb|NP\_248773) (hsiB1/vipA/tssB) type VI secretion system tubule-forming protein VipA [HSI-I (VF0273) - Motility (VFC0204)]

VFG000341(gb|WP\_005694040) (hxB) heme-hemopexin utilization protein B HxB, two-partner secretion (TPS) [Type VI secretion system (VF0273) - Motility (VFC0204)]

VFG002491(gb|WP\_004524547) (fliM) flagellar motor switch protein FliM [Flagella (VF0430) - Motility (VFC0204)]

VFG002406(gb|WP\_000728972) (esaA) type VII secretion system protein EsaA [Type VII secretion system (VF0273) - Motility (VFC0204)]

VFG000816(gb|WP\_001302733) (escI) Type III secretion system inner rod component EscI [TTSS (VF0191) - Effector delivery system (VFC0001)]

VFG044329(gb|WP\_015874964) (irp1) yersiniabactin polyketide synthase HMWP1 [Ybt (VF0564) - Nutritional/Metabolic factor (VFC0001)]

VFG038861(gb|WP\_005314296) (lfhA) lateral flagellar biosynthesis protein [Lateral flagella (VF0474) - Motility (VFC0204)]

VFG000871(gb|WP\_000790574) (fimB) Type 1 fimbriae Regulatory protein fimB [Type 1 fimbriae (VF0221) - Adherence (VFC0001)]

VFG000615(gb|NP\_709454) (iucA) aerobactin synthesis protein IucA [Aerobactin (VF0123) - Nutritional/Metabolic factor (VFC0001)]

VFG050757(gb|WP\_001166319.1) (gspE1) general secretion pathway protein E [T2SS (VF1335) - Effector delivery system (VFC0001)]

VFG001249(gb|NP\_249790) (fleR) two-component response regulator [Flagella (VF0273) - Motility (VFC0204)]

VFG049911(gb|WP\_000393837) (tssF) Type VI secretion system protein TssF [T6SS (VF0579) - Effector delivery system (VFC0001)]

VFG038753(gb|WP\_024944879) (motY) sodium-type flagellar protein MotY [Polar flagella (VF0473) - Motility (VFC0204)]

VFG050655(gb|WP\_000729757.1) (pilI) chemotaxis protein CheW [TFP (VF1334) - Adherence (VFC0001)] [Acinetobacter baumannii]

VFG000423(gb|WP\_000052242) (vexE) Vi polysaccharide export protein VexE [Vi antigen (VF0101) - Immune response (VFC0001)]

VFG049163(gb|WP\_000065646) (clbQ) colibactin biosynthesis thioesterase ClbQ [Colibactin (VF0573) - Exotoxin (VFC0001)]

VFG038872(gb|WP\_005314272) (lfgB) lateral flagellar basal body protein, LfgB [Lateral flagella (VF0474) - Motility (VFC0204)]

VFG042739(gb|NP\_254019) (crc) catabolite repression control protein [Type IV pili (VF0082) - Adherence (VFC0001)]

VFG002191(gb|WP\_002369252) (sprE) serine proteinase, V8 family [SprE (VF0358) - Exoenzyme (VFC0251)]

VFG002300(gb|CAA88565) (tcnA) alpha-toxin [Alpha-toxin (novyi) (VF0386) - Exotoxin (VFC0235)] [Clostridium novyi]

VFG000945(gb|AAK16478) (draD) DraD, periplasmic protein [Dr adhesins (VF0223) - Adherence (VFC0001)]

VFG038387(gb|WP\_011705717) (atsJ) Type VI secretion system protein [T6SS (VF0480) - Effector delivery system (VFC0001)]

VFG048819(gb|WP\_014907234) (KP1\_RS17280) mannose-1-phosphate guanylyltransferase/mannose-6-phosphate guanylyltransferase [Mannose-6-phosphate guanylyltransferase (VF0223) - Adherence (VFC0001)]

VFG034859(gb|WP\_010904544) (espX2) Type III secretion system effector EspX2 [TTSS secreted effectors (VF0273) - Effector delivery system (VFC0001)]

VFG014148(gb|NP\_249768) (flgB) flagellar basal body rod protein FlgB [Flagella (VF0273) - Motility (VFC0204)]

VFG000925(gb|WP\_000140634) (fepC) ferrienterobactin ABC transporter ATPase [Enterobactin (VF0228) - Nutritional/Metabolic factor (VFC0001)]

VFG038342(gb|WP\_005320770) (ascV) Type III secretion system inner membrane export apparatus protein AscV [Type III secretion system (VF0273) - Motility (VFC0204)]

VFG002171(gb|WP\_011109430) (EF0149) aggregation substance [AS (VF0352) - Adherence (VFC0001)] [Enterobacteriaceae]

VFG002534(gb|WP\_004198197) (motA) flagellar motor protein MotA [Flagella (VF0430) - Motility (VFC0204)]

VFG048771(gb|WP\_004190505) (tssF) type VI secretion system baseplate subunit TssF [T6SS (VF0569) - Effector delivery system (VFC0001)]

VFG038820(gb|WP\_161785096) (flgA) flagella basal body P-ring formation protein FlgA [Polar flagella (VF0473) - Motility (VFC0204)]

VFG007550(gb|WP\_000985860) (cheB) chemotaxis-specific methyl-ersterase [Flagella (VF0519) - Motility (VFC0204)]

VFG011515(gb|WP\_004683743) (wbdA) mannosyltransferase [LPS (VF0367) - Immune modulation (VFC0258)]

VFG007823(gb|NP\_217447) (ppsA) phthiocerol synthesis polyketide synthase type I PpsA [PDIM (VF0309) - Immune response (VFC0001)]

VFG048419(gb|WP\_004210873) (entB) 2,3-dihydro-2,3-dihydroxybenzoate synthetase, isochorismatase [Ent (VF0228) - Nutritional/Metabolic factor (VFC0001)]

VFG000933(gb|WP\_001007140) (entB) isochorismatase [Enterobactin (VF0228) - Nutritional/Metabolic factor (VFC0001)]

VFG002416(gb|WP\_001265657) (yagW/ecpD) polymerized tip adhesin of ECP fibers [ECP (VF0404) - Adherence (VFC0001)]

VFG000916(gb|WP\_001017192) (chuS) heme oxygenase ChuS [Chu (VF0227) - Nutritional/Metabolic factor (VFC0001)]

VFG000932(gb|WP\_000026784) (entE) 2,3-dihydroxybenzoate-AMP ligase component of enterobactin synthase [Enterobactin (VF0228) - Nutritional/Metabolic factor (VFC0001)]

VFG050428(gb|WP\_000128073.1) (fimV) hypothetical protein [TFP (VF1334) - Adherence (VFC0001)] [Acinetobacter baumannii]

VFG038671(gb|WP\_011705282) (fliQ) flagellar biosynthetic protein FliQ [Polar flagella (VF0473) - Motility (VFC0204)]

VFG034908(gb|WP\_000978349) (espY3) Type III secretion system effector EspY3 [TTSS secreted effectors (VF0273) - Effector delivery system (VFC0001)]

VFG038501(gb|WP\_043119142) (tapV) type IV pilus assembly protein TapV [Tap type IV pili (VF0475) - Adherence (VFC0001)]

VFG000212(gb|NP\_250408) (pscD) type III secretion system basal body protein PscD [TTSS (VF0083) - Effector delivery system (VFC0001)] [Enterobacteriaceae (VF0001)]

VFG000929(gb|WP\_001375021) (entD) phosphopantetheinyl transferase component of enterobactin synthase multienzyme complex [Enterobactin (VF0228) - Nutritional/Metabolic factor (VFC0001)]

VFG046118(gb|WP\_011205945) (mhp107) P97 paralog, surface adhesin [P97/P102 paralog family (VF0426) - Adherence (VFC0001)]

VFG000873(gb|WP\_000695571) (fimA) Type-1 fimbrial protein, A chain precursor [Type 1 fimbriae (VF0221) - Adherence (VFC0001)]

VFG048528(gb|WP\_004183335) (entD) enterochelin synthetase component D [Ent (VF0562) - Nutritional/Metabolic factor (VFC0001)]

VFG051042(gb|WP\_000653195.1) (hcp/tssD) type VI secretion system tube protein Hcp [T6SS (VF1337) - Effector delivery system (VFC0001)]

VFG002180(gb|WP\_002362627) (cpsK) ABC transporter, permease protein [Capsule (VF0361) - Immune modulation (VFC0001)]

VFG000930(gb|WP\_000077767) (entF) enterobactin synthase multienzyme complex component, ATP-dependent [Enterobactin (VF0228) - Nutritional/Metabolic factor (VFC0001)]

VFG002277(gb|WP\_011009663) (nagH) hyaluronidase [Mu-toxin (VF0389) - Exoenzyme (VFC0251)] [Clostridium (VF0001)]

VFG049157(gb|WP\_014907259) (clbK) colibactin hybrid non-ribosomal peptide synthetase/type I polyketide synthase [Colibactin (VF0573) - Exotoxin (VFC0001)]

VFG002047(gb|WP\_000498818) (gspD) general secretion pathway protein D [T2SS (VF0333) - Effector delivery system (VFC0001)]

VFG044332(gb|WP\_015874967) (ybtE) yersiniabactin biosynthesis salycil-AMP ligase YbtE [Ybt (VF0564) - Nutritional/Metabolic factor (VFC0001)]

VFG037260(gb|WP\_001095752) (barB) siderophore efflux system of the ABC superfamily [Acinetobactin (VF0476) - Adherence (VFC0001)]

VFG045818(gb|WP\_001528154) (tsh) temperature-sensitive protein Tsh [Tsh (VF0233) - Effector delivery system (VFC0001)]

VFG004931(gb|WP\_000669009) (set16) superantigen-like protein SSL1 [SSLs (VF0990) - Exotoxin (VFC0235)]

VFG038659(gb|WP\_011705280) (fliN) flagellar motor switch protein FliN [Polar flagella (VF0473) - Motility (VFC0001)]

VFG049148(gb|WP\_041168941) (clbB) colibactin hybrid non-ribosomal peptide synthetase/type I polyketide synthase [Colibactin (VF0573) - Exotoxin (VFC0001)]

VFG038541(gb|WP\_016350150) (flpD) Flp pilus assembly protein FlpD [Flp type IV pili (VF0476) - Adherence (VFC0001)]

VFG002051(gb|WP\_001115126) (gspH) general secretion pathway protein H [T2SS (VF0333) - Effector delivery system (VFC0001)]

VFG000363(gb|WP\_002212775) (irp2) yersiniabactin biosynthetic protein Irp2 [Yersiniabactin (VF0136) - Nutritional/Metabolic factor (VFC0001)]

VFG043209(gb|WP\_005168769) (cheD) methyl-accepting chemotaxis protein CheD [Flagella (VF0394) - Motility (VFC0001)]

VFG040545(gb|WP\_011190491) (sca1) cell surface antigen Sca1 [Sca1 (VF0498) - Adherence (VFC0001)] [Richardsonella (VF0001)]

VFG038683(gb|WP\_016350056) (flhA) flagellar biosynthesis protein FlhA [Polar flagella (VF0473) - Motility (VFC0001)]

VFG010749(gb|WP\_010945896) (sdhB) Dot/Icm type IV secretion system effector SdhB [Dot/Icm T4SS secretion system (VF0473) - Adherence (VFC0001)]

VFG000934(gb|WP\_000348393) (entA) 2,3-dihydro-2,3-dihydroxybenzoate dehydrogenase EntA [Enterobactin (VF0228) - Nutritional/Metabolic factor (VFC0001)]

VFG038365(gb|WP\_011705044) (hcp1) HcpA-like protein [T6SS (VF0480) - Effector delivery system (VFC0001)]

VFG012505(gb|WP\_000933673) (iroD) esterase [Salmocheilin siderophore (VF0230) - Nutritional/Metabolic factor (VFC0001)]

VFG000925(gb|WP\_000140634) (fepC) ferrienterobactin ABC transporter ATPase [Enterobactin (VF0228) - Nutritional/Metabolic factor (VFC0001)]

VFG000540(gb|NP\_461799) (sptP) type III secretion system effector SptP, tyrosine phosphatase and GTPase-activated [Enterobacteriaceae (VF0001)]

VFG038401(gb|WP\_011705724) (atsQ) Type VI secretion system protein [T6SS (VF0480) - Effector delivery system (VFC0001)]

VFG001224(gb|NP\_249087) (pilU) twitching motility protein PilU [Type IV pili (VF0082) - Adherence (VFC0001)]

VFG010523(gb|WP\_011213649) (LPG\_RS06765) saccharopine dehydrogenase NADP-binding domain-containing [LPG\_RS06765 (VF06765) - Nutritional/Metabolic factor (VFC0001)]

VFG041041(gb|NP\_251059) (PA2369) hypothetical protein [HSI-3 (VF0944) - Effector delivery system (VFC0001)]

VFG049906 (tssK) Type VI secretion system protein TssK [T6SS (VF0579) - Effector delivery system (VFC0001)]

VFG038590(gb|WP\_043118275) (mshE) ATPase protein MshE, GspE-like [MSHA type IV pili (VF0477) - Adherence (VFC0001)]

VFG000365(gb|WP\_002214412) (ybtP) yersiniabactin ABC transporter ATP-binding/permease protein YbtP [Yersiniabactin (VF0136) - Nutritional/Metabolic factor (VFC0001)]

VFG000165(gb|NP\_252915) (pchF) pyochelin synthetase PchF [Pyochelin (VF0095) - Nutritional/Metabolic factor (VFC0001)]

VFG000130(gb|NP\_252238) (algI) alginate o-acetyltransferase AlgI [Alginate (VF0091) - Biofilm (VFC0271)] [Pseudomonas (VF0001)]

VFG002045(gb|WP\_010930608) (bvgS) virulence factors two-component system sensor histidine kinase BvgS [Type III secretion system (VF0001)]

VFG016770(gb|WP\_005767766) (flgI) flagellar P-ring protein FlgI [Flagella (VF0373) - Motility (VFC0204)] [Bacterial flagellin (VF0001)]

VFG002054(gb|WP\_000633233) (gspK) general secretion pathway protein K [T2SS (VF0333) - Effector delivery system (VFC0001)]

VFG049163(gb|WP\_000065646) (clbQ) colibactin biosynthesis thioesterase ClbQ [Colibactin (VF0573) - Exotoxin (VFC0001)]

VFG048808(gb|WP\_004899416) (rfbK1) O9 family phosphomannomutase RfbK1 [Capsule (VF0560) - Immune modulation (VFC0001)]

VFG005215(gb|WP\_000743858) (fbsB) Fibrinogen-binding surface protein B [FbsB (VF0523) - Adherence (VFC0001)]

VFG048654(gb|WP\_004224345) (vasE/tssK) type VI secretion system baseplate subunit TssK [T6SS (VF0569) - Effector delivery system (VFC0001)]

VFG034648(gb|WP\_001245988) (cfaD/cfaE) minor pilin and initiator [Adhesive fimbriae (VF0213) - Adherence (VFC0001)]

VFG000914(gb|WP\_000767894) (focG) F1C minor fimbrial subunit protein G precursor [F1C fimbriae (VF0224)]

VFG001386(gb|NP\_215271) (phoP) Possible two component system response transcriptional positive regulator [PhoP (VF0224)]

VFG013661(gb|WP\_011988426) (pilO) type IV pilus inner membrane platform protein PilO [Type IV pili (VF0404)]

VFG001257(gb|NP\_250135) (fliN) flagellar motor switch protein FliN [Flagella (VF0273) - Motility (VFC0204)]

VFG016362(gb|WP\_000959117) (hal) heme-acquisition leucine-rich repeat protein [Hal (VF0587) - Nutritional/Metabolic factors (VFC0001)]

VFG050670(gb|WP\_000505931.1) (pilJ) methyl-accepting chemotaxis protein [TFP (VF1334) - Adherence (VFC0001)]

VFG002415(gb|WP\_001131063) (yagX/ecpC) E. coli common pilus usher EcpC [ECP (VF0404) - Adherence (VFC0001)]

VFG042736(gb|NP\_253152) (rpoN) RNA polymerase factor sigma-54 [Type IV pili (VF0082) - Adherence (VFC0001)]

VFG038913 (rtxA) multifunctional autoprocessing repeats-in-toxins (MARTX) toxin [RtxA (VF0482) - Exotoxins (VFC0001)]

VFG000919(gb|WP\_001095619) (chuW) Putative oxygen independent coproporphyrinogen III oxidase [Chu (VF0224)]

VFG018682(gb|WP\_005491021) (vopL) type III secretion system effector VopL, actin filament nucleation activator [VopL (VF0224)]

VFG034849(gb|WP\_000129338) (espX1) Type III secretion system effector EspX1 [TTSS secreted effectors (VF1110) - Effector delivery system (VFC0001)]

VFG049902(gb|WP\_011310140) (tssM) Type VI secretion system protein TssM [T6SS (VF0579) - Effector delivery system (VFC0001)]

VFG000164(gb|NP\_252911) (fptA) Fe(III)-pyochelin receptor precursor [Pyochelin (VF0095) - Nutritional/Metabolic factors (VFC0001)]

VFG001229(gb|NP\_249103) (pilK) methyltransferase PilK [Type IV pili (VF0082) - Adherence (VFC0001)] [Pilin (VF0075) - Adherence (VFC0001)]

VFG002434(gb|WP\_011205650) (pilN) type IV pilus inner membrane platform protein PilN [Type IV pili (VF0404)]

VFG000913(gb|WP\_000237770) (focF) F1C minor fimbrial subunit F precursor [F1C fimbriae (VF0224) - Adherence (VFC0001)]

VFG049911(gb|WP\_000393837) (tssF) Type VI secretion system protein TssF [T6SS (VF0579) - Effector delivery system (VFC0001)]

VFG044333(gb|WP\_015874968) (fyuA) yersiniabactin receptor FyuA [Ybt (VF0564) - Nutritional/Metabolic factors (VFC0001)]

VFG050499(gb|WP\_000755268.1) (tsaP) LysM peptidoglycan-binding domain-containing protein [TFP (VF1334) - Adherence (VFC0001)]

VFG041039(gb|NP\_251057) (PA2367) hypothetical protein [HSI-3 (VF0944) - Effector delivery system (VFC0001)]

VFG034612(gb|WP\_000225871) (cfaA) colonisation factor antigen a, chaperone [Adhesive fimbriae (VF0213) - Adherence (VFC0001)]

VFG050164(gb|WP\_000723250) (neuC) UDP-N-acetylglucosamine 2-epimerase [K1 capsule (VF0239) - Invasive factors (VFC0001)]

VFG040222(gb|WP\_011190745) (rvhB8b) VirB8-like protein of the Type IV secretion system [Rvh T4SS (VF0404)]

VFG048247(gb|WP\_002916190) (fimA) type 1 major fimbrial subunit precursor [Type I fimbriae (VF0566) - Adherence (VFC0001)]

VFG038472(gb|WP\_011706550) (tapW) twitching ATPase [Tap type IV pili (VF0475) - Adherence (VFC0001)]

VFG000229 (pilS) pilin [Type IV pili (VF0075) - Adherence (VFC0001)] [Neisseria meningitidis MC58]

VFG007991(gb|YP\_178020) (papA2) trehalose-2-sulfate acyltransferase [Sulfolipid-1 biosynthesis and transport (VF0224)]

VFG007857(gb|NP\_217450) (ppsD) phthiocerol synthesis polyketide synthase type I PpsD [PDIM (VF0309) - Invasive factors (VFC0001)]

VFG038389(gb|WP\_011705718) (atsK) Type VI secretion system protein [T6SS (VF0480) - Effector delivery system (VFC0001)]

VFG039216(gb|NP\_820634) (icmX) Type IVB secretion system protein IcmX [Dot/Icm T4SS (VF0503) - Effector delivery system (VFC0001)]

VFG038796(gb|WP\_016351321) (flgE) flagellar hook protein FlgE [Polar flagella (VF0473) - Motility (VFC0204)]

VFG038655(gb|WP\_011705279) (fliM) flagellar motor switch protein FliM [Polar flagella (VF0473) - Motility (VFC0204)]

VFG006218(gb|WP\_079760670) (opa) outer membrane beta-barrel protein [Opa (VF0076) - Invasion (VFC0083)]

VFG000423(gb|WP\_000052242) (vexE) Vi polysaccharide export protein VexE [Vi antigen (VF0101) - Immune response (VFC0001)]

VFG050787(gb|WP\_001112089.1) (gspF) general secretion pathway protein F [T2SS (VF1335) - Effector delivery system (VFC0001)]

VFG034795 (espN) Type III secretion system effector EspN [TTSS secreted effectors (VF1110) - Effector delivery system (VFC0001)]

VFG002389(gb|NP\_218396) (espK) ESX-1 type VII secretion system EspK [ESX-1 (VF0315) - Effector delivery system (VFC0001)]

VFG001256(gb|NP\_250134) (fliM) flagellar motor switch protein FliM [Flagella (VF0273) - Motility (VFC0204)]

VFG034679(gb|WP\_000074207) (ibeB) Cu(+)/Ag(+) efflux RND transporter outer membrane channel CusC [IbeB (VF0224)]

VFG038611(gb|WP\_016349153) (mshI1) MSHA (mannose-sensitive hemagglutinin) pili biogenesis protein MshI1 [MshI1 (VF0224)]

VFG049144(gb|WP\_002892069) (acrB) acriflavine resistance protein B [AcrAB (VF0568) - Antimicrobial activity (VFC0001)]

VFG001259(gb|NP\_250137) (fliP) flagellar biosynthetic protein FliP [Flagella (VF0273) - Motility (VFC0204)]

VFG013260(gb|WP\_010868968) (lgtC) glycosyltransferase [LOS (VF0044) - Immune modulation (VFC0258)]

VFG012865 (ipaH) invasion plasmid antigen IpaH [TTSS secreted effectors (VF0978) - Effector delivery system (VFC0001)]

VFG001391(gb|NP\_215677) (narG) nitrate reductase subunit alpha [Nitrate reductase (VF0302) - Nutritional/Metabolic factors (VFC0001)]

VFG001297 (capA) capsular polysaccharide type 5/8 biosynthesis protein CapA [Capsule (VF0003) - Immune m  
VFG049164(gb|WP\_004175305) (clbS) colibactin self-protection protein ClbS [Colibactin (VF0573) - Exotoxin  
VFG000871(gb|WP\_000790574) (fimB) Type 1 fimbriae Regulatory protein fimB [Type 1 fimbriae (VF0221) - A  
VFG046680(gb|WP\_003020700) (FTT\_RS04120) ABC transporter ATP-binding protein [Capsule (VF0543) - In  
VFG001405(gb|NP\_217219) (sigA/rpoV) RNA polymerase sigma factor SigA [SigA (VF0257) - Regulation (VF  
VFG016058(gb|NP\_251114) (pvdL) peptide synthase PvdL [Pyoverdine (VF0094) - Nutritional/Metabolic factor  
VFG038373(gb|WP\_011705708) (atsA) Type VI secretion system protein [T6SS (VF0480) - Effector delivery sy  
VFG017846(gb|WP\_011988432) (pilR) type IV pilus biosynthesis protein PilR [Type IV pili (VF0401) - Adheren  
VFG038635(gb|WP\_016350051) (fliH) flagellar assembly protein FliH [Polar flagella (VF0473) - Motility (VFC  
VFG000312(gb|WP\_000542820) (sabA/hopP) outer membrane protein adhesin [SabA (VF0055) - Adherence (V  
VFG000879(gb|WP\_000832235) (fimH) FimH protein precursor [Type 1 fimbriae (VF0221) - Adherence (VFC0  
VFG001938(gb|YP\_002344530) (Cj1137c) glycosyltransferase [LOS (VF0326) - Immune modulation (VFC0258  
VFG038889(gb|WP\_005314215) (lafT) LafT, flagella motor stator protein [Lateral flagella (VF0474) - Motility (V  
VFG000111(gb|NP\_253215) (pilA) type 4 fimbrial precursor PilA [Type IV pili (VF0082) - Adherence (VFC000  
VFG001985(gb|YP\_002344650) (porA) major outer membrane protein [MOMP (VF0328) - Adherence (VFC000  
VFG001940(gb|YP\_002344532) (wlaN) beta-1,3 galactosyltransferase [LOS (VF0326) - Immune modulation (V  
VFG013503(gb|WP\_005694190) (lsgA) lipopolysaccharide biosynthesis transporter [LOS (VF0044) - Immune m  
VFG001248(gb|NP\_249788) (fleQ) transcriptional regulator FleQ [Flagella (VF0273) - Motility (VFC0204)] [Pse  
VFG000935(gb|WP\_001222189) (iroN) salmochelin receptor IroN [Salmochelin siderophore (VF0230) - Nutritio  
VFG043625(gb|WP\_000813718) (mrkC) fimbrial biogenesis outer membrane usher protein mrkC precursor [Typ  
VFG050372(gb|WP\_001017033.1) (pilQ) type IV pilus secretin PilQ [TFP (VF1334) - Adherence (VFC0001)] [4  
VFG048002(gb|WP\_003022141) (iglJ) Type VI secretion system protein IglJ [T6SS (VF0544) - Effector delivery  
VFG048687(gb|WP\_002902160) (hcp/tssD) type VI secretion system protein, Hcp family [T6SS (VF0569) - Eff  
VFG037882(gb|WP\_000872593) (ACICU\_RS00405) polysaccharide biosynthesis/export family protein [Capsule  
VFG048951(gb|WP\_015875028) (KP1\_RS17330) polysaccharide biosynthesis tyrosine autokinase [Capsule (VF  
VFG000352(gb|WP\_002208793) (psaB) chaperone protein PsaB [Myf/pH6 antigen (VF0134) - Adherence (VFC  
VFG043623(gb|WP\_002916122) (mrkF) type 3 fimbrial minor pilin subunit MrkF [Type 3 fimbriae (VF0567) - E  
VFG007370(gb|WP\_000145786) (cheV) chemotaxis protein CheV [Flagella (VF0519) - Motility (VFC0204)] [V  
VFG001375(gb|WP\_000594468) (cps4K) capsular polysaccharide biosynthesis protein Cps4K [Capsule (VF0144  
VFG001960(gb|YP\_002344815) (Cj1432c) sugar transferase [Capsule (VF0323) - Immune modulation (VFC025  
VFG012597(gb|WP\_000089593) (chuA) Outer membrane heme/hemoglobin receptor ChuA [Chu (VF0234) - Nu  
VFG000885(gb|WP\_000265729) (papD) chaperone protein PapD [P fimbriae (VF0220) - Adherence (VFC0001)  
VFG038756(gb|WP\_011706626) (flrC) transcriptional activator [Polar flagella (VF0473) - Motility (VFC0204)]  
VFG006199(gb|WP\_010980842) (pilT2) twitching motility protein PilT [Type IV pili (VF0075) - Adherence (VF  
VFG000917(gb|WP\_000089583) (chuA) Outer membrane heme/hemoglobin receptor ChuA [Chu (VF0227) - Nu  
VFG005957(gb|WP\_001193768) (wzy) O-antigen polysaccharide polymerase Wzy [Capsule (VF0144) - Immune  
VFG050157(gb|WP\_001331698) (kpsF) Polysialic acid capsule expression protein [K1 capsule (VF0239) - Invas  
VFG038413(gb|WP\_043118350) (fimC) outer membrane usher protein [Type I pili (VF0486) - Adherence (VFC  
VFG042857(gb|WP\_003015347) (pilO) Type IV pilus glycosylation protein [Type IV pili (VF0458) - Adherence  
VFG000001(gb|WP\_010930610) (fhaB) filamentous hemagglutinin/adhesin [FHA (VF0025) - Adherence (VFC0  
VFG005781(gb|WP\_000650746) (cylE) haemolysin CylE [-haemolysin/cytolysin (VF0279) - Exotoxin (VFC023  
VFG000927(gb|WP\_000096764) (fepE) LPS O-antigen length regulator [Enterobactin (VF0228) - Nutritional/M  
VFG000361(gb|WP\_000982866) (ybtU) yersiniabactin biosynthetic protein YbtU [Yersiniabactin (VF0136) - Nu  
VFG002492(gb|WP\_004184995) (fliN) flagellar motor switch protein FliN [Flagella (VF0430) - Motility (VFC0  
VFG038105(gb|WP\_000591436) (galU) UTP--glucose-1-phosphate uridylyltransferase GalU [Capsule (VF0465)  
VFG038545(gb|WP\_043118798) (flpC) Flp pilus secretin FlpC [Flp type IV pili (VF0476) - Adherence (VFC000



VFG000333(gb|WP\_005694147) (lic2A) glycosyltransferase [LOS (VF0044) - Immune modulation (VFC0258)]

VFG038707(gb|WP\_016350059) (cheA-2) chemotaxis protein CheA [Polar flagella (VF0473) - Motility (VFC0258)]

VFG050214(gb|WP\_011860844) (cwpV) hemagglutinin/adhesin [CwpV (VF0596) - Adherence (VFC0001)] [Clostridium]

VFG000926(gb|WP\_001443194) (fepD) ferrienterobactin ABC transporter permease [Enterobactin (VF0228) - Nutritional/Metabolism]

VFG049161(gb|WP\_001029878) (clbO) colibactin polyketide synthase ClbO [Colibactin (VF0573) - Exotoxin (VFC0235)]

VFG049007(gb|WP\_002911561) (rcsA) transcriptional activator for ctr capsule biosynthesis [RcsAB (VF0571) - Adherence (VFC0001)]

VFG002300(gb|CAA88565) (tcnA) alpha-toxin [Alpha-toxin (novyi) (VF0386) - Exotoxin (VFC0235)] [Clostridium]

VFG038549(gb|WP\_016350148) (flpB) Flp pilus assembly protein [Flp type IV pili (VF0476) - Adherence (VFC0001)]

VFG000887(gb|WP\_000597713) (papK) P pilus minor subunit PapK [P fimbriae (VF0220) - Adherence (VFC0001)]

VFG003512(gb|WP\_011817126) (ysspD) IpaD/SipD/SspD family type III secretion system needle tip protein [Yersinia]

VFG048478(gb|WP\_004147521) (fepG) iron-enterobactin transporter permease [Ent (VF0562) - Nutritional/Metabolism]

VFG049900 (tssM) Type VI secretion system protein TssM [T6SS (VF0579) - Effector delivery system (VFC0086)]

VFG042977(gb|WP\_002379309) (ebpB) endocarditis and biofilm-associated pilus minor subunit EbpB [Ebp pili (VF0220) - Adherence (VFC0001)]

VFG043773(gb|YP\_398516) (bont) botulinum neurotoxin, BoNT [BoNT (VF0375) - Exotoxin (VFC0235)] [Clostridium]

VFG001291(gb|WP\_001039417) (cna) collagen adhesin precursor [CNA (VF0005) - Adherence (VFC0001)] [Staphylococcus]

VFG038851(gb|WP\_016350359) (nueB) pseudaminic acid synthase, NeuB [Polar flagella (VF0473) - Motility (VFC0204)]

VFG002536(gb|WP\_004530401) (fliD) flagellar capping protein FliD [Flagella (VF0430) - Motility (VFC0204)]

VFG037176(gb|WP\_001081735) (plc1) phospholipase C [Phospholipase C (VF0470) - Exotoxin (VFC0235)] [Aerobactin]

VFG041013(gb|NP\_250203) (hcpA) secreted protein Hcp [HSI-2 (VF0943) - Effector delivery system (VFC0086)]

VFG038784(gb|WP\_011706638) (flgH) flagellar basal body L-ring protein [Polar flagella (VF0473) - Motility (VFC0204)]

VFG001241(gb|NP\_249774) (flgH) flagellar L-ring protein precursor FlgH [Flagella (VF0273) - Motility (VFC0204)]

VFG048863(gb|WP\_014907229) (KP1\_RS17300) GDP-mannose mannosyl hydrolase [Capsule (VF0560) - Immune modulation]

VFG050159(gb|WP\_001331697) (kpsD) Polysialic acid transport protein precursor [K1 capsule (VF0239) - Invasion]

VFG000826(gb|WP\_000379425) (escS) Type III secretion system minor export apparatus protein EscS [TTSS (VF0225) - Exotoxin (VFC0235)]

VFG000358(gb|WP\_002212885) (fyuA/psn) pesticin/yersiniabactin receptor protein [Yersiniabactin (VF0136) - Nutritional/Metabolism]

VFG000939(gb|WP\_001287497) (iucB) aerobactin siderophore biosynthesis protein IucB [Aerobactin (VF0229) - Nutritional/Metabolism]

VFG000906(gb|WP\_001142375) (hlyA) Hemolysin A [-Hemolysin (VF0225) - Exotoxin (VFC0235)] [Escherichia]

VFG000127(gb|NP\_252235) (algG) outer membrane protein AlgE [Alginate (VF0091) - Biofilm (VFC0271)] [Pseudomonas]

VFG043624(gb|WP\_004149659) (mrkD) fimbrial adhesin protein precursor MrkD [Type 3 fimbriae (VF0567) - Adherence (VFC0001)]

VFG000862(gb|WP\_014639426) (pet) Pet serine protease precursor, autotransporter [Pet (VF0217) - Effector delivery system (VFC0086)]

VFG001408(gb|NP\_217456) (mas) multifunctional mycocerosic acid synthase [PDIM (VF0309) - Immune modulation]

VFG000360(gb|WP\_002212799) (ybtT) type II thioesterase YbtT [Yersiniabactin (VF0136) - Nutritional/Metabolism]

VFG038537(gb|WP\_016350151) (flpE) Flp pilus assembly protein, ATPase [Flp type IV pili (VF0476) - Adherence (VFC0001)]

VFG000877(gb|WP\_001244821) (fimF) FimF protein precursor [Type 1 fimbriae (VF0221) - Adherence (VFC0001)]

VFG050386(gb|WP\_000355489.1) (pilT) type IV pilus twitching motility protein PilT [TFP (VF1334) - Adherence (VFC0001)]

VFG038553(gb|WP\_016350147) (flpA) prepilin peptidase [Flp type IV pili (VF0476) - Adherence (VFC0001)] [Clostridium]

VFG002069(gb|NP\_248773) (hsiB1/vipA/tssB) type VI secretion system tubule-forming protein VipA [HSI-I (VF0225) - Exotoxin (VFC0235)]

VFG048620(gb|WP\_014907843) (iutA) ferric aerobactin receptor IutA [Aerobactin (VF0565) - Nutritional/Metabolism]

VFG000739(gb|AAC38392) (eae) intimin [Intimin (VF0177) - Effector delivery system (VFC0086)] [Escherichia]

VFG001279(gb|WP\_001060526) (sdrC) Ser-Asp rich fibrinogen-binding bone sialoprotein-binding protein [SDR (VF0225) - Exotoxin (VFC0235)]

VFG000878(gb|WP\_000872015) (fimG) FimG protein precursor [Type 1 fimbriae (VF0221) - Adherence (VFC0001)]

VFG039912(gb|WP\_011191202) (rvhB4b) type IV secretion system protein VirB4 precursor [Rvh T4SS (VF0486) - Adherence (VFC0001)]

VFG000874(gb|WP\_000824100) (fimI) Fimbrin-like protein fimI precursor [Type 1 fimbriae (VF0221) - Adherence (VFC0001)]

VFG038687(gb|WP\_016350057) (flhF) flagellar biosynthesis protein FlhF [Polar flagella (VF0473) - Motility (VFC0204)]

VFG002413(gb|WP\_000389022) (ykgK/ecpR) regulator protein EcpR [ECP (VF0404) - Adherence (VFC0001)]

VFG044323(gb|WP\_015874960) (ybtS) yersiniabactin biosynthesis salicylate synthase YbtS [Ybt (VF0564) - Nutritional/Metabolism]



VFG000907(gb|WP\_000376545) (hlyB) Hemolysin B [-Hemolysin (VF0225) - Exotoxin (VFC0235)] [Escherichia coli (VF000000)]

VFG016260(gb|WP\_000714434) (hblD) Hemolysin BL lytic component L1 [HBL (VF0532) - Exotoxin (VFC0235)] [Escherichia coli (VF000000)]

VFG013315(gb|WP\_005694490) (lgtF) beta-1,4-glucosyltransferase [LOS (VF0044) - Immune modulation (VFC000000)] [Escherichia coli (VF000000)]

VFG041033(gb|NP\_251051) (PA2361) hypothetical protein [HSI-3 (VF0944) - Effector delivery system (VFC000000)] [Pseudomonas aeruginosa (VF000000)]

VFG001142(gb|WP\_042960771) (hopZ) outer membrane protein adhesin [HopZ (VF0054) - Adherence (VFC000000)] [Escherichia coli (VF000000)]

VFG001861(gb|WP\_010945955) (katA) catalase/(hydro)peroxidase [KatAB (VF0168) - Stress survival (VFC028000)] [Escherichia coli (VF000000)]

VFG038568(gb|WP\_016349166) (mshO) MSHA (mannose-sensitive hemagglutinin) pili biogenesis protein MshO [MSHA type IV pili (VF0477) - Adherence (VFC000000)] [Escherichia coli (VF000000)]

VFG001267(gb|NP\_252913) (pchH) ABC transporter ATP-binding protein [Pyochelin (VF0095) - Nutritional/Motility (VFC000000)] [Pseudomonas aeruginosa (VF000000)]

VFG002414(gb|WP\_000730972) (yagZ/ecpA) E. coli common pilus structural subunit EcpA [ECP (VF0404) - Adherence (VFC000000)] [Escherichia coli (VF000000)]

VFG014707(gb|NP\_250151) (motC) flagellar motor protein [Flagella (VF0273) - Motility (VFC0204)] [Pseudomonas aeruginosa (VF000000)]

VFG002052(gb|WP\_000820136) (gspI) general secretion pathway protein I [T2SS (VF0333) - Effector delivery system (VFC000000)] [Escherichia coli (VF000000)]

VFG038596(gb|WP\_016349157) (mshM) membrane protein with ATPase domain, GspA-like [MSHA type IV pili (VF0477) - Adherence (VFC000000)] [Escherichia coli (VF000000)]

VFG001381(gb|YP\_177728) (icl) Isocitrate lyase Icl (isocitrase) (isocitratase) [Isocitrate lyase (VF0253) - Others (VFC000000)] [Escherichia coli (VF000000)]

VFG037513(gb|WP\_085947930) (ACICU\_RS04590) porin family protein [HemO cluster (VF0636) - Nutritional/Motility (VFC000000)] [Escherichia coli (VF000000)]

VFG002270(gb|WP\_011180104) (badA/vomp/brp) Surface protein/Bartonella adhesin BadA/VompA/VompC/VompD [BadA (VF0104) - Adherence (VFC000000)] [Bartonella henselae (VF000000)]

VFG000434(gb|NP\_490509) (pefC) plasmid-encoded fimbriae usher protein PefC [Pef (VF0104) - Adherence (VFC000000)] [Escherichia coli (VF000000)]

VFG006300(gb|WP\_010980816) (frpA) iron-regulated protein FrpA [RTX protein (VF0897) - Adherence (VFC000000)] [Escherichia coli (VF000000)]

VFG013476(gb|WP\_032828451) (kpsF) KpsF/GutQ family sugar isomerase [LOS (VF0044) - Immune modulation (VFC000000)] [Escherichia coli (VF000000)]

VFG045791(gb|WP\_000481500) (cgsD) transcriptional regulator CsgD [Curli fibers (VF1138) - Adherence (VFC000000)] [Escherichia coli (VF000000)]

VFG038883(gb|WP\_005314227) (lafB) flagellar hook associated protein LafB [Lateral flagella (VF0474) - Motility (VFC000000)] [Escherichia coli (VF000000)]

VFG000872(gb|WP\_000044711) (fimE) Type 1 fimbriae Regulatory protein fimE [Type 1 fimbriae (VF0221) - Adherence (VFC000000)] [Escherichia coli (VF000000)]

VFG001223(gb|NP\_249086) (pilT) twitching motility protein PilT [Type IV pili (VF0082) - Adherence (VFC000000)] [Escherichia coli (VF000000)]

VFG016038(gb|NP\_251090) (pvdJ) pyoverdine biosynthesis protein PvdJ [Pyoverdine (VF0094) - Nutritional/Motility (VFC000000)] [Pseudomonas aeruginosa (VF000000)]

VFG038393(gb|WP\_010634228) (dotU) Type VI secretion system protein DotU [T6SS (VF0480) - Effector delivery system (VFC000000)] [Escherichia coli (VF000000)]

VFG001225(gb|NP\_249099) (pilG) twitching motility protein PilG [Type IV pili (VF0082) - Adherence (VFC000000)] [Escherichia coli (VF000000)]

VFG034577(gb|WP\_014639428) (aafD) chaperone protein AafD [AAFs (VF0214) - Adherence (VFC000001)] [Escherichia coli (VF000000)]

VFG038402(gb|WP\_011705725) (vasK/icmF) Type VI secretion system protein [T6SS (VF0480) - Effector delivery system (VFC000000)] [Escherichia coli (VF000000)]

VFG034772(gb|WP\_000627910) (espL4) Type III secretion system effector EspL4 [TTSS secreted effectors (VF000000)] [Escherichia coli (VF000000)]

VFG034831(gb|WP\_000484243) (espR4) Type III secretion system effector espR4 [TTSS secreted effectors (VF000000)] [Escherichia coli (VF000000)]

VFG034928(gb|WP\_001239082) (lifA/efa1) lymphostatin Efa1/LifA [Lymphostatin/LifA (VF0175) - Effector delivery system (VFC000000)] [Escherichia coli (VF000000)]

VFG002436(gb|WP\_080341181) (boaA) surface-exposed protein, autotransporter [BoaA (VF0434) - Adherence (VFC000000)] [Escherichia coli (VF000000)]

VFG038369(gb|WP\_011705706) (hcp) hemolysin co-regulated protein [T6SS (VF0480) - Effector delivery system (VFC000000)] [Escherichia coli (VF000000)]

VFG002342(gb|WP\_011816603) (flgK) flagellar hook-associated protein 1 FlgK [Flagella (VF0394) - Motility (VFC000000)] [Escherichia coli (VF000000)]

VFG019178(gb|WP\_012291519) (bont) botulinum neurotoxin, BoNT [BoNT (VF0375) - Exotoxin (VFC0235)] [Clostridium botulinum (VF000000)]

VFG002287(gb|WP\_011860904) (toxA) toxin A [TcdA (VF0376) - Exotoxin (VFC0235)] [Clostridium difficile (VF000000)]

VFG050291(gb|WP\_014302131) (DIP\_RS19245) C40 family peptidase [DIP1621 (VF0603) - Adherence (VFC000000)] [Deinococcus radiodurans (VF000000)]

VFG038695(gb|WP\_017409955) (fliA) flagellar biosynthesis sigma factor [Polar flagella (VF0473) - Motility (VFC000000)] [Escherichia coli (VF000000)]

VFG016216(gb|WP\_000576719) (alo) thiol-activated cytolysin [ALO (VF0534) - Exotoxin (VFC0235)] [Bacillus anthracis (VF000000)]

VFG045632(gb|WP\_002286924) (ecbA/fss3) Collagen binding MSCRAMM, EcbA/Fss3 [EcbA (VF0539) - Adherence (VFC000000)] [Escherichia coli (VF000000)]

VFG048307(gb|WP\_041937815) (fimH) type 1 fimbrial adhesin precursor [Type I fimbriae (VF0566) - Adherence (VFC000000)] [Escherichia coli (VF000000)]

VFG050959(gb|WP\_000556915.1) (tssM) type VI secretion system membrane subunit TssM [T6SS (VF1337) - Effector delivery system (VFC000000)] [Escherichia coli (VF000000)]

VFG037490(gb|WP\_001240499) (ACICU\_RS04575) FecR domain-containing protein [HemO cluster (VF0636) - Nutritional/Motility (VFC000000)] [Escherichia coli (VF000000)]

VFG050296(gb|NP\_250645) (fapB) minor amyloid subunit FapB [Fap (VF1191) - Adherence (VFC000001)] [Pseudomonas aeruginosa (VF000000)]

VFG038261(gb|WP\_016352107) (exeA) general secretion pathway protein A [Exe T2SS (VF0478) - Effector delivery system (VFC000000)] [Escherichia coli (VF000000)]

VFG038639(gb|WP\_011705275) (fliI) flagellum-specific ATP synthase [Polar flagella (VF0473) - Motility (VFC000000)] [Escherichia coli (VF000000)]

VFG038593(gb|WP\_016349158) (mshN) Tetratricopeptide repeat protein, PilF-like [MSHA type IV pili (VF0477) - Adherence (VFC000000)] [Escherichia coli (VF000000)]

VFG038381(gb|WP\_011705714) (atsG) Type VI secretion system protein [T6SS (VF0480) - Effector delivery system (VFC0204)] [Yersinia enterocolitica]

VFG048621(gb|WP\_004213924) (iutA) ferric aerobactin receptor IutA [Aerobactin (VF0565) - Nutritional/Metabolic factor (VFC0001)] [Enterobacteriaceae]

VFG038395(gb|WP\_011705721) (clpB) type VI secretion system ATPase ClpV1 [T6SS (VF0480) - Effector delivery system (VFC0204)] [Yersinia enterocolitica]

VFG005763(gb|WP\_000859501) (cyID) malonyl-CoA-ACP transacylase CyID [-haemolysin/cytolysin (VF0279) - Effector delivery system (VFC0204)] [Yersinia enterocolitica]

VFG044331(gb|WP\_015874966) (ybtT) type II thioesterase YbtT [Ybt (VF0564) - Nutritional/Metabolic factor (VFC0001)] [Yersinia enterocolitica]

VFG048819(gb|WP\_014907234) (KP1\_RS17280) mannose-1-phosphate guanylyltransferase/mannose-6-phosphate guanylyltransferase [Mannose-6-phosphate guanylyltransferase (VF0562) - Nutritional/Metabolic factor (VFC0001)] [Klebsiella pneumoniae]

VFG048429(gb|WP\_004183353) (entE) enterobactin synthase subunit E [Ent (VF0562) - Nutritional/Metabolic factor (VFC0001)] [Enterobacteriaceae]

VFG000347(gb|WP\_010869038) (hgpC) hemoglobin-binding protein [Hgp (VF0270) - Nutritional/Metabolic factor (VFC0001)] [Yersinia enterocolitica]

VFG001254(gb|NP\_249795) (fliI) flagellum-specific ATP synthase FliI [Flagella (VF0273) - Motility (VFC0204)] [Yersinia enterocolitica]

VFG000044(gb|WP\_004568087) (bscR) Bordetella Bsc type III secretion system protein BscR [TTSS (VF0035) - Effector delivery system (VFC0001)] [Bordetella pertussis]

VFG002381(gb|NP\_218386) (eccB1) ESX-1 type VII secretion system protein EccB1 [ESX-1 (VF0315) - Effector delivery system (VFC0001)] [Mycobacterium tuberculosis]

VFG044195(gb|WP\_003022876) (fslE) outer membrane siderophore receptor FslE [Rhizoferrin (VF0551) - Nutritional/Metabolic factor (VFC0001)] [Yersinia enterocolitica]

VFG000844(gb|WP\_001034100) (espP) autotransporter, serine protease [EspP (VF0208) - Effector delivery system (VFC0001)] [Yersinia enterocolitica]

VFG002173(gb|WP\_010785625) (asa1) aggregation substance Asa1 [AS (VF0352) - Adherence (VFC0001)] [Enterobacteriaceae]

VFG013648(gb|WP\_012104486) (invD) invasin D protein [Invasin D (VF0576) - Invasion (VFC0083)] [Yersinia enterocolitica]

VFG000824(gb|WP\_001291694) (escU) Type III secretion system export apparatus switch protein EscU [TTSS (VF0035) - Effector delivery system (VFC0001)] [Bordetella pertussis]

VFG017845(gb|WP\_011988489) (pilR) type IV pilus biosynthesis protein PilR [Type IV pili (VF0401) - Adherence (VFC0001)] [Yersinia enterocolitica]

VFG002529(gb|WP\_011205290) (tsr) methyl-accepting chemotaxis protein I [Flagella (VF0430) - Motility (VFC0204)] [Yersinia enterocolitica]

VFG048518(gb|WP\_012737617) (fepA) outer membrane receptor FepA [Ent (VF0562) - Nutritional/Metabolic factor (VFC0001)] [Enterobacteriaceae]

VFG002099(gb|WP\_010948192) (lepB) Dot/Icm type IV secretion system effector LepB, Rab1 GTPase activating protein [Type IV secretion system (VF0035) - Effector delivery system (VFC0001)] [Yersinia enterocolitica]

VFG048348(gb|WP\_004149658) (mrkJ) phosphodiesterase [Type 3 fimbriae (VF0567) - Biofilm (VFC0271)] [Klebsiella pneumoniae]

VFG000931(gb|WP\_001336900) (entC) isochorismate synthase 1 [Enterobactin (VF0228) - Nutritional/Metabolic factor (VFC0001)] [Enterobacteriaceae]

VFG038488(gb|WP\_016349432) (tapY1) type IV pilus biogenesis protein [Tap type IV pili (VF0475) - Adherence (VFC0001)] [Yersinia enterocolitica]

VFG015515(gb|NP\_252903) (phzE1) phenazine biosynthesis protein PhzE [Pyocyanin (VF0100) - Nutritional/Metabolic factor (VFC0001)] [Pseudomonas aeruginosa]

VFG000181(gb|NP\_251792) (xcpS) general secretion pathway protein F [Xcp secretion system (VF0084) - Effector delivery system (VFC0001)] [Yersinia enterocolitica]

VFG002055(gb|WP\_000097229) (gspL) general secretion pathway protein L [T2SS (VF0333) - Effector delivery system (VFC0001)] [Yersinia enterocolitica]

VFG001936(gb|YP\_002344528) (Cj1135) glucosyltransferase [LOS (VF0326) - Immune modulation (VFC0258)] [Yersinia enterocolitica]

VFG048267(gb|WP\_015875145) (fimC) periplasmic chaperone [Type I fimbriae (VF0566) - Adherence (VFC0001)] [Yersinia enterocolitica]

VFG038743(gb|WP\_016350352) (flaH) flagellar hook-associated protein 2 [Polar flagella (VF0473) - Motility (VFC0204)] [Yersinia enterocolitica]

VFG042072(gb|WP\_010930809) (BP\_RS11150) SpoIIIE family protein phosphatase [TTSS (VF0035) - Effector delivery system (VFC0001)] [Bordetella pertussis]

VFG000231 (pilC) pilus assembly protein [Type IV pili (VF0075) - Adherence (VFC0001)] [Neisseria meningitidis]

VFG001443(gb|AAF37887) (ompA) outer membrane protein A [OmpA (VF0236) - Invasion (VFC0083)] [Escherichia coli]

VFG038828(gb|WP\_011706649) (flgN) flagellar protein FlgN [Polar flagella (VF0473) - Motility (VFC0204)] [Yersinia enterocolitica]

VFG000178(gb|NP\_251789) (xcpV) general secretion pathway protein I [Xcp secretion system (VF0084) - Effector delivery system (VFC0001)] [Yersinia enterocolitica]

VFG000589(gb|NP\_460061) (pipB) type III secretion system effector PipB [TTSS-2 secreted effectors (VF0947) - Effector delivery system (VFC0001)] [Yersinia enterocolitica]

VFG048797(gb|WP\_004175261) (ugd) UDP-glucose 6-dehydrogenase [Capsule (VF0560) - Immune modulation (VFC0258)] [Yersinia enterocolitica]

VFG000974(gb|WP\_010922711) (scpA/scpB) streptococcal C5a peptidase [C5a peptidase (VF0245) - Adherence (VFC0001)] [Streptococcus pneumoniae]

VFG041016(gb|NP\_250349) (PA1658) hypothetical protein [HSI-2 (VF0943) - Effector delivery system (VFC0001)] [Yersinia enterocolitica]

VFG001863(gb|WP\_010946430) (ligA) LigA, interaptin [LigA (VF0165) - Effector delivery system (VFC0086)] [Yersinia enterocolitica]

VFG045790(gb|WP\_000833288) (cgsE) curli production assembly/transport protein CsgE [Curli fibers (VF1138) - Adherence (VFC0001)] [Yersinia enterocolitica]

VFG002050(gb|WP\_001087302) (gspG) general secretion pathway protein G [T2SS (VF0333) - Effector delivery system (VFC0001)] [Yersinia enterocolitica]

VFG002191(gb|WP\_002369252) (sprE) serine proteinase, V8 family [SprE (VF0358) - Exoenzyme (VFC0251)] [Yersinia enterocolitica]

VFG038753(gb|WP\_024944879) (motY) sodium-type flagellar protein MotY [Polar flagella (VF0473) - Motility (VFC0204)] [Yersinia enterocolitica]

VFG048830(gb|WP\_014907233) (gndA) NADP-dependent phosphogluconate dehydrogenase [Capsule (VF0560) - Immune modulation (VFC0258)] [Yersinia enterocolitica]

VFG049154(gb|WP\_014907257) (clbH) colibactin non-ribosomal peptide synthetase ClbH [Colibactin (VF0573) - Adherence (VFC0001)] [Yersinia enterocolitica]

VFG038727(gb|WP\_011705295) (cheW) chemotaxis protein CheW [Polar flagella (VF0473) - Motility (VFC0204)] [Yersinia enterocolitica]

VFG049903(gb|WP\_001240533) (tssA) Type VI secretion system protein TssA [T6SS (VF0579) - Effector deliv  
VFG000459(gb|NP\_460116) (csgC) curli assembly protein CsgC [Agf (VF0103) - Adherence (VFC0001)] [Salm  
VFG048885(gb|WP\_014907227) (gmd) GDP-mannose 4,6-dehydratase [Capsule (VF0560) - Immune modulation  
VFG005297(gb|WP\_000723540) (pilB) major subunit PilB [PI-2a (VF0528) - Adherence (VFC0001)] [Streptoco  
VFG038600(gb|WP\_016349156) (mshL) MSHA (mannose-sensitive hemagglutinin) pili biogenesis protein MshL  
VFG036992(gb|WP\_002224969) (mtrD) multiple transferable resistance system protein MtrD [MtrCDE (VF0451  
VFG014893(gb|NP\_254009) (algC) phosphomannomutase AlgC [Alginate (VF0091) - Biofilm (VFC0271)] [Pse  
VFG044165(gb|WP\_001041793) (entS) enterobactin exporter, iron-regulated [Enterobactin (VF0228) - Nutrition  
VFG039676(gb|NP\_821023) (coxCC15) Coxiella Dot/Icm type IVB secretion system translocated effector [T4S  
VFG007959(gb|NP\_217478) (Rv2962c) PGL/p-HBAD biosynthesis rhamnosyltransferase [PDIM (VF0309) - Im  
VFG050910(gb|WP\_001178477.1) (vgrG/tssI) type VI secretion system tip protein VgrG [T6SS (VF1337) - Effe  
VFG021863(gb|YP\_178022) (PPE68) PPE family protein [ESX-1 (VF0315) - Effector delivery system (VFC008  
VFG000937(gb|WP\_000750139) (iucD) L-lysine 6-monooxygenase IucD [Aerobactin (VF0229) - Nutritional/M  
VFG038882(gb|WP\_005314247) (maf-5) modification accessory factor [Lateral flagella (VF0474) - Motility (VF  
VFG038397(gb|WP\_011705722) (vasH) sigma-54 dependent transcriptional regulator [T6SS (VF0480) - Effector  
VFG000122(gb|NP\_252230) (algD) GDP-mannose 6-dehydrogenase AlgD [Alginate (VF0091) - Biofilm (VFC0  
VFG001218(gb|NP\_253727) (pilQ) type 4 fimbrial biogenesis protein PilQ [Type IV pili (VF0082) - Adherence  
VFG000936(gb|WP\_016265865) (iutA) ferric aerobactin receptor precursor IutA [Aerobactin (VF0229) - Nutritio  
VFG038836(gb|WP\_011707085) (pomA2) chemotaxis protein PomA [Polar flagella (VF0473) - Motility (VFC0  
VFG002481(gb|WP\_009940775) (vgrG-5) Type VI secretion system protein VgrG5 [T6SS-1 (VF0429) - Effector  
VFG049916(gb|WP\_000103365) (vgrG/tssI) type VI secretion system effector VgrG [T6SS (VF0579) - Effector  
VFG001226(gb|NP\_249100) (pilH) twitching motility protein PilH [Type IV pili (VF0082) - Adherence (VFC00  
VFG039585(gb|NP\_820667) (CBU\_1685) Coxiella Dot/Icm type IVB secretion system translocated effector [T4  
VFG049124(gb|WP\_012737540) (allD) ureidoglycolate dehydrogenase [Allantion utilization (VF0572) - Nutritio  
VFG034873(gb|WP\_001270084) (espX5) Type III secretion system effector EspX5 [TTSS secreted effectors (VF  
VFG038832(gb|WP\_016351724) (pomB2) flagellar motor protein MotB [Polar flagella (VF0473) - Motility (VFC  
VFG038342(gb|WP\_005320770) (ascV) Type III secretion system inner membrane export apparatus protein AscV  
VFG044322(gb|WP\_004190148) (iroE) siderophore esterase IroE [Sal (VF0563) - Nutritional/Metabolic factor (N  
VFG038764(gb|WP\_017409846) (flrA) FleQ protein [Polar flagella (VF0473) - Motility (VFC0204)] [Aeromona  
VFG038432(gb|WP\_016352168) (tapB) type IV pilus assembly ATPase, PilB-like [Tap type IV pili (VF0475) - A  
VFG000924(gb|WP\_001234311) (fepB) ferrienterobactin ABC transporter periplasmic binding protein [Enteroba  
VFG048277(gb|WP\_009308599) (fimD) outer membrane usher protein [Type I fimbriae (VF0566) - Adherence  
VFG000010(gb|WP\_010930243) (tcfA) tracheal colonization factor precursor [TcfA (VF0032) - Adherence (VFC  
VFG038760(gb|WP\_016351312) (flrB) two-component sensor kinase [Polar flagella (VF0473) - Motility (VFC0  
VFG040863(gb|WP\_011190526) (sca2) cell surface antigen Sca2 [Sca2 (VF0495) - Motility (VFC0204)] [Ricket  
VFG034636(gb|WP\_000358674) (cfaC) colonisation factor antigen c, usher [Adhesive fimbriae (VF0213) - Adhe  
VFG002497(gb|WP\_011204776) (fliK) flagellar hook-length control protein FliK [Flagella (VF0430) - Motility (V  
VFG048665(gb|WP\_004176431) (dotU/tssL) type VI secretion system protein, DotU/TssL family [T6SS (VF056  
VFG049156(gb|WP\_077265119) (clbJ) colibactin non-ribosomal peptide synthetase ClbJ [Colibactin (VF0573) -  
VFG049062(gb|WP\_015875020) (rfbD) UDP-galactopyranose mutase [LPS (VF0561) - Immune modulation (VF  
VFG049162(gb|WP\_002430641) (clbP) precolibactin peptidase ClbP [Colibactin (VF0573) - Exotoxin (VFC023  
VFG012438(gb|WP\_000022458) (espJ) Type III secretion system effector EspJ, adenosine diphosphate (ADP) ri  
VFG002346(gb|WP\_005160438) (flgG) flagellar basal-body rod protein FlgG [Flagella (VF0394) - Motility (VF  
VFG038367(gb|WP\_011705045) (vgrG1) Type VI secretion system effector VgrG1, ADP-ribosyltransferase [T6  
VFG049095(gb|WP\_002912373) (rfbA) O-antigen export ABC transporter permease RfbA [LPS (VF0561) - Imn  
VFG038780(gb|WP\_011706637) (flgI) flagellar basal body P-ring protein [Polar flagella (VF0473) - Motility (VF

VFG012636(gb|NP\_858256) (*virB*) transcriptional activator VirB [TTSS (VF0118) - Effector delivery system (VFC000902)]

VFG000902(gb|WP\_001034089) (*sat*) Accreted auto transpoter toxin [Sat (VF0231) - Effector delivery system (VFC038354)]

VFG038354(gb|WP\_005320741) (*ascT*) Type III secretion system inner membrane export apparatus protein AscT [Type III secretion system (VF0273) - Motility (VFC0204)]

VFG001238(gb|NP\_249771) (*flgE*) flagellar hook protein FlgE [Flagella (VF0273) - Motility (VFC0204)]

VFG002483(gb|WP\_004556233) (*tagB-5*) Type VI secretion system associated protein TagB-5 [T6SS-1 (VF0422) - Effector delivery system (VFC0086)]

VFG012089(gb|WP\_011861682) (*cwp66*) cell wall-binding protein Cwp66 [Cwp66 (VF0591) - Adherence (VFC0001)]

VFG006538(gb|WP\_000832067) (*flgI*) flagellar P-ring protein precursor FlgI [Flagella (VF0051) - Motility (VFC0001)]

VFG000478(gb|NP\_459678) (*fur*) ferric iron uptake transcriptional regulator [Fur (VF0113) - Regulation (VFC0001)]

VFG049160(gb|WP\_001327259) (*clbN*) colibactin non-ribosomal peptide synthetase ClbN [Colibactin (VF0573) - Adherence (VFC0001)]

VFG002224(gb|WP\_002963682) (*wbkA*) mannosyltransferase [LPS (VF0367) - Immune modulation (VFC0258)]

VFG050167(gb|WP\_000038461) (*neuD*) NeuD protein involved in sialic acid synthesis [K1 capsule (VF0239) - Invasion (VFC0001)]

VFG037573 (*csuA*) Csu pilus subunit CsuA [Csu fimbriae (VF0461) - Biofilm (VFC0271)]

VFG038804(gb|WP\_011706643) (*flgC*) flagellar basal body rod protein FlgC [Polar flagella (VF0473) - Motility (VFC0001)]

VFG002046(gb|WP\_000135089) (*gspC*) general secretion pathway protein C [T2SS (VF0333) - Effector delivery system (VFC0001)]

VFG050166(gb|WP\_000066003) (*neuB*) N-acylneuraminate-9-phosphate synthase [K1 capsule (VF0239) - Invasion (VFC0001)]

VFG000123(gb|NP\_252231) (*alg8*) alginate-c5-mannuronan-epimerase AlgG [Alginate (VF0091) - Biofilm (VFC0001)]

VFG000908(gb|WP\_000860472) (*hlyD*) Hemolysin D [-Hemolysin (VF0225) - Exotoxin (VFC0235)]

VFG049051(gb|WP\_014907239) (*KP1\_RS17230*) glycosyltransferase [LPS (VF0561) - Immune modulation (VFC0001)]

VFG048237(gb|WP\_002916189) (*fimE*) tyrosine recombinase [Type I fimbriae (VF0566) - Adherence (VFC0001)]

VFG038281(gb|WP\_016349337) (*exeF*) general secretion pathway protein F [Exe T2SS (VF0478) - Effector delivery system (VFC0001)]

VFG002120(gb|WP\_010948516) (*sidH*) Dot/Icm type IV secretion system effector SidH [Dot/Icm T4SS secreted effectors (VF0478) - Effector delivery system (VFC0001)]

VFG034875(gb|WP\_001270087) (*espX5*) Type III secretion system effector EspX5 [TTSS secreted effectors (VF0478) - Effector delivery system (VFC0001)]

VFG050168(gb|WP\_000590258) (*kpsT*) Polysialic acid transport ATP-binding protein [K1 capsule (VF0239) - Invasion (VFC0001)]

VFG038723(gb|WP\_011705294) (*AHML\_RS07540*) CobQ/CobB/MinD/ParA family protein [Polar flagella (VF0473) - Motility (VFC0001)]

VFG038285(gb|WP\_005308483) (*exeG*) general secretion pathway protein G [Exe T2SS (VF0478) - Effector delivery system (VFC0001)]

VFG002195(gb|WP\_002399773) (*EF0818*) polysaccharide lyase, family 8 [Hyaluronidase (VF0359) - Exoenzyme (VFC0001)]

VFG001974(gb|YP\_002344829) (*kpsT*) capsule polysaccharide ABC transporter ATP-binding protein [Capsule (VF0239) - Invasion (VFC0001)]

VFG002291(gb|WP\_003458888) (*ext*) epsilon-toxin [Epsilon-toxin (ETX) (VF0380) - Exotoxin (VFC0235)]

VFG041018(gb|NP\_250351) (*PA1660*) hypothetical protein [HSI-2 (VF0943) - Effector delivery system (VFC0001)]

VFG016046(gb|NP\_251103) (*pvdH*) diaminobutyrate-2-oxoglutarate aminotransferase PvdH [Pyoverdine (VF0001) - Exoenzyme (VFC0001)]

VFG000522(gb|NP\_460387) (*ssaU*) type III secretion system export apparatus switch protein SsaU [TTSS (SPI-2) (VF0084) - Effector delivery system (VFC0001)]

VFG000182(gb|NP\_251793) (*xcpR*) general secretion pathway protein E [Xcp secretion system (VF0084) - Effector delivery system (VFC0001)]

VFG002307(gb|NP\_461452) (*sinH*) intimin-like protein [SinH (VF0400) - Adherence (VFC0001)]

VFG038675(gb|WP\_011705283) (*fliR*) flagellar biosynthesis protein FliR [Polar flagella (VF0473) - Motility (VFC0001)]

VFG037316(gb|WP\_000744381) (*entE*) non-ribosomal peptide synthetase adenylate-forming enzyme of acinetobacter [Ent (VF0562) - Nutritional/Metabolic (VFC0001)]

VFG001900(gb|YP\_002343773) (*flhB*) flagellar biosynthetic protein [Flagella (VF0114) - Motility (VFC0204)]

VFG038845(gb|WP\_016351249) (*neuA*) NeuA protein [Polar flagella (VF0473) - Motility (VFC0204)]

VFG048449(gb|WP\_012737621) (*fepB*) iron-enterobactin transporter periplasmic binding protein [Ent (VF0562) - Nutritional/Metabolic (VFC0001)]

VFG049133(gb|WP\_004177236) (*acrA*) acriflavine resistance protein A [AcrAB (VF0568) - Antimicrobial activity (VFC0001)]

VFG038371(gb|WP\_011705707) (*vgrG2*) VgrG protein [T6SS (VF0480) - Effector delivery system (VFC0086)]

VFG050162(gb|WP\_001161829) (*kpsS*) Capsule polysaccharide export protein [K1 capsule (VF0239) - Invasion (VFC0001)]

VFG050273(gb|WP\_000874844) (*futC2*) alpha-(1,2)-fucosyltransferase [Lewis antigen (VF0057) - Immune modulation (VFC0001)]

VFG038269(gb|WP\_075384415) (*exeC*) general secretion pathway protein C [Exe T2SS (VF0478) - Effector delivery system (VFC0001)]

VFG049899(gb|WP\_001087735) (*tssA*) Type VI secretion system protein TssA [T6SS (VF0579) - Effector delivery system (VFC0086)]

VFG048508(gb|WP\_012737618) (*fes*) enterobactin/ferric enterobactin esterase [Ent (VF0562) - Nutritional/Metabolic (VFC0001)]

VFG038460(gb|WP\_043119325) (*tapQ*) type IV pilus secretin PilQ [Tap type IV pili (VF0475) - Adherence (VFC0001)]

VFG048439(gb|WP\_014907941) (entC) isochorismate synthase [Ent (VF0562) - Nutritional/Metabolic factor (VF0562)]

VFG039351(gb|NP\_819656) (cetCb3) Coxiella Dot/Icm type IVB secretion system translocated effector [T4SS secretion system (VF039351)]

VFG049904 (clpV/tssH) Type VI secretion system ATPase ClpV/TssH [T6SS (VF0579) - Effector delivery system (VF0579)]

VFG038403(gb|WP\_011705726) (atsS) Type VI secretion system protein [T6SS (VF0480) - Effector delivery system (VF0480)]

VFG038273(gb|WP\_016349335) (exeD) general secretion pathway protein D [Exe T2SS (VF0478) - Effector delivery system (VF0478)]

VFG042739(gb|NP\_254019) (crc) catabolite repression control protein [Type IV pili (VF0082) - Adherence (VF0082)]

VFG000912(gb|WP\_001443207) (focD) F1C fimbrial usher [F1C fimbriae (VF0224) - Adherence (VFC0001)] [F1C fimbriae (VF0224)]

VFG000362(gb|WP\_002212777) (irp1) yersiniabactin biosynthetic protein Irp1 [Yersiniabactin (VF0136) - Nutritional/Metabolic factor (VF0136)]

VFG011757(gb|WP\_011117594) (virB4) Type IV secretion system protein VirB4 [Type IV secretion system (VF011757)]

VFG048317(gb|WP\_014906959) (fimK) transcriptional regulator [Type I fimbriae (VF0566) - Adherence (VFC0001)]

VFG002070(gb|NP\_248774) (hsiC1/vipB/tssC) type VI secretion system tubule-forming protein VipB [HSI-I (VF002070)]

VFG006217 (opa) outer membrane beta-barrel protein [Opa (VF0076) - Invasion (VFC0083)] [Neisseria meningitidis (VF006217)]

VFG048459(gb|WP\_004147525) (entS) enterobactin exporter EntS [Ent (VF0562) - Nutritional/Metabolic factor (VF0562)]

VFG047137(gb|WP\_003022294) (wzy) membrane protein [LPS (VF0542) - Immune modulation (VFC0258)] [F1C fimbriae (VF0224)]

VFG003523(gb|WP\_005173750) (ysaN) type III secretion system ATPase SctN [Ysa TTSS (VF1025) - Effector delivery system (VF1025)]

VFG038464(gb|WP\_011707389) (tapT) twitching ATPase [Tap type IV pili (VF0475) - Adherence (VFC0001)]

VFG000133(gb|NP\_252241) (algA) phosphomannose isomerase / guanosine 5'-diphospho-D-mannose pyrophosphatase [Alginate (VF000133)]

VFG038525(gb|WP\_043118801) (flpH) Flp pilus assembly protein FlpH [Flp type IV pili (VF0476) - Adherence (VFC0001)]

VFG000079(gb|NP\_463763) (clpC) endopeptidase Clp ATP-binding chain C [ClpC (VF0072) - Stress survival (VF000079)]

VFG050163(gb|WP\_000197083) (neuE) polysialic acid biosynthesis protein [K1 capsule (VF0239) - Invasion (VF0239)]

VFG038788(gb|WP\_011706639) (flgG) flagellar basal body rod protein FlgG [Polar flagella (VF0473) - Motility (VF0473)]

VFG040507(gb|WP\_011191135) (ompB) outer membrane protein OmpB [ROmpB/Sca5 (VF0493) - Invasion (VF0493)]

VFG000690(gb|AAP42183) (AAP42183) Bcs3' [Capsule (VF0043) - Immune modulation (VFC0258)] [Haemophilus influenzae (VF000690)]

VFG002095(gb|WP\_010947666) (ralF) Dot/Icm type IV secretion system effector guanine nucleotide exchange protein [Dot/Icm type IV secretion system (VF002095)]

VFG000876(gb|WP\_000120946) (fimD) Outer membrane usher protein fimD precursor [Type 1 fimbriae (VF0224) - Adherence (VFC0001)]

VFG049084(gb|WP\_004175264) (rfbB) O-antigen export ABC transporter ATP-binding protein RfbB [LPS (VF049084)]

VFG031564(gb|YP\_177826) (PE\_PGERS30) PE-PGRS family protein PE\_PGERS30 [PE/PE-PGRS (VF0316) - Immune modulation (VFC0258)]

VFG047162(gb|WP\_003022298) (wbtE) nucleotide sugar dehydrogenase [LPS (VF0542) - Immune modulation (VFC0258)]

VFG019180(gb|WP\_011987710) (bont) botulinum neurotoxin, BoNT [BoNT (VF0375) - Exotoxin (VFC0235)] [Botulinum neurotoxin (VF019180)]

VFG000297(gb|WP\_000835501) (cagN) type IV secretion system protein Cag17/CagN, membrane-associated protein [Cag17/CagN (VF000297)]

VFG049073(gb|WP\_015875021) (KP1\_RS17240) DUF4422 domain-containing protein [LPS (VF0561) - Immune modulation (VFC0258)]

VFG000038(gb|WP\_003807115) (bplA) probable oxidoreductase [LPS (VF0033) - Immune modulation (VFC0258)]

VFG002158(gb|NP\_464456) (lplA1) lipolate protein ligase [LplA1 (VF0347) - Nutritional/Metabolic factor (VF0347)]

VFG002172(gb|WP\_010710127) (EF0485) aggregation substance [AS (VF0352) - Adherence (VFC0001)] [Enterobacteriaceae (VF002172)]

VFG011429(gb|WP\_002963985) (acpXL) acyl carrier protein [LPS (VF0367) - Immune modulation (VFC0258)]

VFG048755(gb|WP\_049127998) (icmF/tssM) type VI secretion protein TssM [T6SS (VF0569) - Effector delivery system (VF0569)]

VFG002463(gb|WP\_011205639) (bsaO) Type III secretion system protein BsaO [Bsa T3SS (VF0428) - Effector delivery system (VF0428)]

VFG002359(gb|WP\_005164498) (flhD) flagellar transcriptional activator FlhD [Flagella (VF0394) - Motility (VF0394)]

VFG002053(gb|WP\_001250462) (gspJ) general secretion pathway protein J [T2SS (VF0333) - Effector delivery system (VF0333)]

VFG013594(gb|WP\_164927859) (hgpB) TonB-dependent hemoglobin/transferrin/lactoferrin family receptor [Hemoglobin (VF013594)]

VFG049919(gb|AAD32394) (bslA) s-layer protein [BslA (VF0411) - Adherence (VFC0001)] [Bacillus anthracis (VF049919)]

VFG043500(gb|WP\_011206108) (mhp271) p97 cilium adhesin paralog [P97/P102 paralog family (VF0426) - Adherence (VFC0001)]

VFG001447(gb|CAA50007) (cnf1) cytotoxic necrotizing factor 1 [CNF-1 (VF0240) - Exotoxin (VFC0235)] [Escherichia coli (VF001447)]

VFG043212(gb|WP\_005168761) (motB) flagellar motor protein MotB [Flagella (VF0394) - Motility (VFC0204)]

VFG048771(gb|WP\_004190505) (tssF) type VI secretion system baseplate subunit TssF [T6SS (VF0569) - Effector delivery system (VF0569)]

VFG012033(gb|YP\_002344722) (pseD/maf2) motility accessory factor PseD [Flagella (VF0114) - Motility (VFC0204)]

VFG001963(gb|YP\_002344818) (Cj1435c) phosphatase [Capsule (VF0323) - Immune modulation (VFC0258)] [Mycobacterium tuberculosis]

VFG001810(gb|YP\_178017) (fbpD) MPT51/MPB51 antigen [Antigen 85 (VF0311) - Adherence (VFC0001)] [Mycobacterium tuberculosis]

VFG048779(gb|WP\_004190503) (tssG) type VI secretion system baseplate subunit TssG [T6SS (VF0569) - Effector delivery system (VFC0086)] [Yersinia enterocolitica]

VFG045335(gb|AHK25020) (llsB) SagB family dehydrogenase LlsB [LLS (VF0410) - Exotoxin (VFC0235)] [Listeria monocytogenes]

VFG001444(gb|AAG10151) (aslA) putative arylsulfatase [AslA (VF0238) - Invasion (VFC0083)] [Escherichia coli]

VFG038293(gb|WP\_016349340) (exeI) general secretion pathway protein I [Exe T2SS (VF0478) - Effector delivery system (VFC0086)] [Yersinia enterocolitica]

VFG044326(gb|WP\_001327262) (ybtP) yersiniabactin ABC transporter ATP-binding/permease protein YbtP [Yersiniabactin (VF0229) - Exotoxin (VFC0235)] [Yersinia enterocolitica]

VFG038505(gb|WP\_011705643) (tapF) type IV pilus biogenesis/stability protein, pilW-like [Tap type IV pili (VF0475) - Adherence (VFC0001)] [Aeromonas hydrophila]

VFG038533(gb|WP\_016350152) (flpF) traffic ATPase [Flp type IV pili (VF0476) - Adherence (VFC0001)] [Aeromonas hydrophila]

VFG038468(gb|WP\_016351972) (tapU) twitching ATPase [Tap type IV pili (VF0475) - Adherence (VFC0001)] [Aeromonas hydrophila]

VFG002049(gb|WP\_001173470) (gspF) general secretion pathway protein F [T2SS (VF0333) - Effector delivery system (VFC0086)] [Yersinia enterocolitica]

VFG038772(gb|WP\_016351319) (flgK) flagellar hook-associated protein FlgK [Polar flagella (VF0473) - Motility (VFC0204)] [Yersinia enterocolitica]

VFG002071(gb|NP\_248775) (hcp1) type VI secretion system substrate Hcp1 [HSI-I (VF0334) - Effector delivery system (VFC0086)] [Yersinia enterocolitica]

VFG002465(gb|WP\_009940818) (bsaM) Type III secretion system protein BsaM [Bsa T3SS (VF0428) - Effector delivery system (VFC0271)] [Pseudomonas aeruginosa]

VFG012509(gb|WP\_001111200) (iroC) ATP binding cassette transporter [Salmochelin siderophore (VF0230) - Nutritional/Metabolic factor (VFC0272)] [Escherichia coli]

VFG038309(gb|WP\_016349344) (exeM) general secretion pathway protein M [Exe T2SS (VF0478) - Effector delivery system (VFC0086)] [Yersinia enterocolitica]

VFG038587(gb|WP\_016349160) (mshG) MSHA (mannose-sensitive hemagglutinin) pili biogenesis protein MshG [Type IV pili (VF0082) - Adherence (VFC0001)] [Pseudomonas aeruginosa]

VFG049910(gb|WP\_000348788) (tssG) Type VI secretion system protein TssG [T6SS (VF0579) - Effector delivery system (VFC0086)] [Yersinia enterocolitica]

VFG001400(gb|NP\_216865) (plcC) phospholipase C [Phospholipase C (VF0320) - Exotoxin (VFC0235)] [Mycobacterium tuberculosis]

VFG002276(gb|WP\_011009653) (colA) collagenase [Kappa-toxin (VF0388) - Exoenzyme (VFC0251)] [Clostridium perfringens]

VFG034815(gb|WP\_000671689) (espR1) Type III secretion system effector espR1 [TTSS secreted effectors (VF0333) - Effector delivery system (VFC0086)] [Yersinia enterocolitica]

VFG037837(gb|WP\_000868104) (lpxD) UDP-3-O-(3-hydroxymyristoyl)glucosamine N-acyltransferase [LPS (VF0466) - Immune modulation (VFC0258)] [Pseudomonas aeruginosa]

VFG043626(gb|WP\_000820818) (mrkB) fimbrial chaperone protein mrkB precursor [Type 3 fimbriae (VF0567) - Adherence (VFC0001)] [Pseudomonas aeruginosa]

VFG042734(gb|NP\_249343) (vfr) cAMP-regulatory protein [Type IV pili (VF0082) - Adherence (VFC0001)] [Pseudomonas aeruginosa]

VFG037762(gb|WP\_000078878) (lpxL) lauroyl acyltransferase [LPS (VF0466) - Immune modulation (VFC0258)] [Pseudomonas aeruginosa]

VFG048676(gb|WP\_014907726) (ompA) OmpA family protein [T6SS (VF0569) - Effector delivery system (VFC0086)] [Yersinia enterocolitica]

VFG051028(gb|WP\_000471445.1) (tssK) type VI secretion system baseplate subunit TssK [T6SS (VF1337) - Effector delivery system (VFC0086)] [Yersinia enterocolitica]

VFG000938(gb|WP\_001015709) (iucC) aerobactin siderophore biosynthesis protein IucC [Aerobactin (VF0229) - Exotoxin (VFC0235)] [Yersinia enterocolitica]

VFG002076(gb|NP\_248780) (clpV1) type VI secretion system AAA+ family ATPase [HSI-I (VF0334) - Effector delivery system (VFC0086)] [Yersinia enterocolitica]

VFG001263(gb|NP\_250143) (flhA) flagellar biosynthesis protein FlhA [Flagella (VF0273) - Motility (VFC0204)] [Yersinia enterocolitica]

VFG048257(gb|WP\_004174507) (fimI) type 1 pilus biosynthesis fimbrial protein [Type I fimbriae (VF0566) - Adherence (VFC0001)] [Pseudomonas aeruginosa]

VFG049158(gb|WP\_001297937) (clbL) colibactin biosynthesis amidase ClbL [Colibactin (VF0573) - Exotoxin (VFC0235)] [Yersinia enterocolitica]

VFG001214(gb|NP\_253237) (pilR) two-component response regulator PilR [Type IV pili (VF0082) - Adherence (VFC0001)] [Pseudomonas aeruginosa]

VFG050400(gb|WP\_000347039.1) (pilU) PilT/PilU family type 4a pilus ATPase [TFP (VF1334) - Adherence (VFC0001)] [Pseudomonas aeruginosa]

VFG012621(gb|WP\_000189352) (chuY) ChuY [Chu (VF0234) - Nutritional/Metabolic factor (VFC0272)] [Escherichia coli]

VFG022130(gb|NP\_214804) (eccD3) Type IIV secretion system transmembrane protein EccD3 [ESX-3 (VF0521) - Effector delivery system (VFC0086)] [Mycobacterium tuberculosis]

VFG038407(gb|WP\_011705728) (vgrG3) VgrG protein [T6SS (VF0480) - Effector delivery system (VFC0086)] [Yersinia enterocolitica]

VFG045520(gb|WP\_010947043) (legC1) Dot/Icm type IV secretion system effector LegC1 [Dot/Icm T4SS secreted effectors (VF0333) - Effector delivery system (VFC0086)] [Yersinia enterocolitica]

VFG015000(gb|NP\_252339) (mucP) metalloprotease protease [Alginate (VF0091) - Biofilm (VFC0271)] [Pseudomonas aeruginosa]

VFG048708(gb|WP\_041168969) (vgrG/tssI) type VI secretion system tip protein VgrG [T6SS (VF0569) - Effector delivery system (VFC0086)] [Yersinia enterocolitica]

VFG041276(gb|WP\_010947021) (lem8) Dot/Icm type IV secretion system effector Lem8 [Dot/Icm T4SS secreted effectors (VF0333) - Effector delivery system (VFC0086)] [Yersinia enterocolitica]

VFG016346(gb|WP\_001035927) (BAS\_RS06430) immune inhibitor A [InhA (VF0536) - Exoenzyme (VFC0251)] [Mycobacterium tuberculosis]

VFG002467(gb|WP\_004525308) (bsaK) Type III secretion system protein BsaK [Bsa T3SS (VF0428) - Effector delivery system (VFC0271)] [Pseudomonas aeruginosa]

VFG038364(gb|WP\_005320615) (aexT) Type III secretion system effector AexT, bifunctional toxin with GTPase [AexT (VF0368) - Regulation (VFC0272)] [Yersinia enterocolitica]

VFG011626(gb|WP\_002965156) (bvrR) response regulator transcription factor [BvrR-BvrS (VF0368) - Regulation (VFC0272)] [Yersinia enterocolitica]

VFG001290(gb|WP\_000745817) (clfB) Clumping factor B, adhesin [Clumping factor (VF0004) - Adherence (VFC0001)] [Staphylococcus aureus]



VFG050247(gb|NP\_219793) (CT\_288) hypothetical protein [TTSS secreted effectors (VF0711) - Effector delivery (VFC0271)] [Yersinia enterocolitica]

VFG047708(gb|WP\_003022611) (carB) carbamoyl phosphate synthase large subunit [Pyrimidine biosynthesis (VF0091) - Biofilm (VFC0271)] [Yersinia enterocolitica]

VFG000131(gb|NP\_252239) (algJ) alginate o-acetyltransferase AlgJ [Alginate (VF0091) - Biofilm (VFC0271)] [Yersinia enterocolitica]

VFG043656(gb|WP\_003377818) (C2I) C2 toxin (component-I) [C2 toxin (VF0384) - Exotoxin (VFC0235)] [Clostridium botulinum]

VFG000884(gb|WP\_000654937) (papC) usher protein PapC [P fimbriae (VF0220) - Adherence (VFC0001)] [Escherichia coli]

VFG000343(gb|WP\_164927854) (hitB) iron ABC transporter permease [HitABC (VF0268) - Nutritional/Metabolic factor (VFC0271)] [Yersinia enterocolitica]

VFG034880(gb|WP\_000535069) (espX6) Type III secretion system effector EspX6 [TTSS secreted effectors (VF0191) - Effector delivery (VFC0271)] [Yersinia enterocolitica]

VFG000802(gb|WP\_000953255) (escD) Type III secretion system outer MS ring protein EscD [TTSS (VF0191) - Effector delivery (VFC0271)] [Yersinia enterocolitica]

VFG050699(gb|WP\_000840548.1) (pilR) sigma-54 dependent transcriptional regulator [TFP (VF1334) - Adherence (VFC0001)] [Yersinia enterocolitica]

VFG002259(gb|WP\_011181332) (trwK) Trw type IV secretion system VirB4-like trwK protein [Trw type IV secretion system (VF0479) - Effector delivery (VFC0271)] [Yersinia enterocolitica]

VFG038329(gb|WP\_011899438) (ascC) Type III secretion system OM ring protein AscC [T3SS (VF0479) - Effector delivery (VFC0271)] [Yersinia enterocolitica]

VFG000918(gb|WP\_001312167) (chuT) periplasmic heme-binding protein ChuT [Chu (VF0227) - Nutritional/Metabolic factor (VFC0271)] [Yersinia enterocolitica]

VFG037028(gb|WP\_002218620) (katA) catalase [KatA (VF0454) - Stress survival (VFC0282)] [Neisseria meningitidis]

VFG002048(gb|WP\_000249362) (gspE) general secretion pathway protein E [T2SS (VF0333) - Effector delivery (VFC0271)] [Yersinia enterocolitica]

VFG000166(gb|NP\_252916) (pchE) dihydroaeruginosic acid synthetase PchE [Pyochelin (VF0095) - Nutritional/Metabolic factor (VFC0271)] [Yersinia enterocolitica]

VFG001353(gb|WP\_001100143) (cbpG) choline binding protein G [CBPs (VF0145) - Adherence (VFC0001)] [Staphylococcus aureus]

VFG014950(gb|NP\_249457) (mucD) serine protease MucD precursor [Alginate (VF0091) - Biofilm (VFC0271)] [Yersinia enterocolitica]

VFG000364(gb|WP\_000140406) (ybtA) transcriptional regulator YbtA [Yersiniabactin (VF0136) - Nutritional/Metabolic factor (VFC0271)] [Yersinia enterocolitica]

VFG050772(gb|WP\_001020922.1) (gspE2) putative secretion pathway ATPase [T2SS (VF1335) - Effector delivery (VFC0271)] [Yersinia enterocolitica]

VFG021876(gb|NP\_218393) (espI) ESX-1 secretion-associated protein EspI [ESX-1 (VF0315) - Effector delivery (VFC0271)] [Mycobacterium tuberculosis]

VFG044325(gb|WP\_002212761) (ybtQ) yersiniabactin ABC transporter ATP-binding/permease protein YbtQ [Yersiniabactin (VF0136) - Nutritional/Metabolic factor (VFC0271)] [Yersinia enterocolitica]

VFG035902(gb|WP\_000209220) (aatP) permease AatP [Dispersin (VF0215) - Others (VFC0346)] [Escherichia coli]

VFG002382(gb|NP\_218387) (eccCa1) ESX-1 type VII secretion system FtsK/SpoIIIE family protein EccCa1 [ESX-1 (VF0315) - Effector delivery (VFC0271)] [Mycobacterium tuberculosis]

VFG039436 (CBU\_1107\*) Coxiella Dot/Icm type IVB secretion system translocated effector [T4SS secreted effectors (VF0429) - Effector delivery (VFC0271)] [Coxiella burnetii]

VFG014984(gb|NP\_253136) (algW) AlgW protein [Alginate (VF0091) - Biofilm (VFC0271)] [Pseudomonas aeruginosa]

VFG002333(gb|WP\_005168827) (fliK) flagellar hook-length control protein FliK [Flagella (VF0394) - Motility (VFC0204)] [Yersinia enterocolitica]

VFG002067(gb|NP\_248771) (fha1) type VI secretion system forkhead-associated protein Fha1 [HSI-I (VF0334) - Adherence (VFC0001)] [Yersinia enterocolitica]

VFG000064(gb|WP\_010930831) (bcrD) Type III secretion system LcrD homolog protein BcrD [TTSS (VF0035) - Effector delivery (VFC0271)] [Yersinia enterocolitica]

VFG044096(gb|NP\_252908) (PA4218) transporter [Pyochelin (VF0095) - Nutritional/Metabolic factor (VFC0271)] [Yersinia enterocolitica]

VFG001966(gb|YP\_002344821) (Cj1438c) sugar transferase [Capsule (VF0323) - Immune modulation (VFC0251)] [Yersinia enterocolitica]

VFG045567(gb|WP\_010948074) (LPG\_RS11920) Dot/Icm type IV secretion system effector [Dot/Icm T4SS secreted effectors (VF0429) - Effector delivery (VFC0271)] [Coxiella burnetii]

VFG043211(gb|WP\_032902679) (cheA) chemotaxis protein CheA [Flagella (VF0394) - Motility (VFC0204)] [Yersinia enterocolitica]

VFG038816(gb|WP\_011706646) (cheV) CheV [Polar flagella (VF0473) - Motility (VFC0204)] [Aeromonas hydrophila]

VFG050115(gb|WP\_002081542) (cesA) Cereulide synthetase A, CesA [Cereulide (VF0583) - Exotoxin (VFC0235)] [Clostridium botulinum]

VFG048338(gb|WP\_002916079) (mrkI) LuxR family regulatory protein [Type 3 fimbriae (VF0567) - Biofilm (VFC0271)] [Yersinia enterocolitica]

VFG048488(gb|WP\_002893737) (fepC) iron-enterobactin transporter ATP-binding protein [Ent (VF0562) - Nutritional/Metabolic factor (VFC0271)] [Yersinia enterocolitica]

VFG000025(gb|WP\_010929995) (cyaA) bifunctional hemolysin-adenylate cyclase precursor [Cya (VF0028) - Exotoxin (VFC0235)] [Escherichia coli]

VFG049152(gb|WP\_000337350) (clbF) colibactin biosynthesis dehydrogenase ClbF [Colibactin (VF0573) - Exotoxin (VFC0235)] [Escherichia coli]

VFG013604 (hgbA) TonB-dependent hemoglobin/transferrin/lactoferrin family receptor [Hgp (VF0270) - Nutritional/Metabolic factor (VFC0271)] [Yersinia enterocolitica]

VFG002489(gb|WP\_181937968) (tssM-5) Type VI secretion system protein TssM [T6SS-1 (VF0429) - Effector delivery (VFC0271)] [Yersinia enterocolitica]

VFG000477(gb|NP\_461845) (rpoS) RNA polymerase sigma factor RpoS [RpoS (VF0112) - Regulation (VFC0301)] [Yersinia enterocolitica]

VFG002219(gb|WP\_011005413) (cgs) cyclic beta 1-2 glucan synthetase [CG (VF0366) - Immune modulation (VFC0251)] [Yersinia enterocolitica]

VFG049029(gb|WP\_014907241) (KP1\_RS17220) glycosyltransferase [LPS (VF0561) - Immune modulation (VFC0251)] [Yersinia enterocolitica]

VFG049120(gb|WP\_012737535) (allB) allantoinase [Allantoin utilization (VF0572) - Nutritional/Metabolic factor (VFC0271)] [Yersinia enterocolitica]

VFG046177(gb|NP\_820262) (CBU\_1268) Coxiella Dot/Icm type IVB secretion system translocated effector [T4SS secreted effectors (VF0429) - Effector delivery (VFC0271)] [Coxiella burnetii]

VFG034915(gb|WP\_000225947) (espY4) Type III secretion system effector EspY4 [TTSS secreted effectors (VF0191) - Effector delivery (VFC0271)] [Yersinia enterocolitica]

VFG001228(gb|NP\_249102) (pilJ) twitching motility protein PilJ [Type IV pili (VF0082) - Adherence (VFC0001)]

VFG051435(gb|NP\_220394.1) (pmpH) polymorphic membrane protein PmpH [Pmps (VF1346) - Adherence (VFC0001)]

VFG048287(gb|WP\_014906962) (fimF) type 1 fimbrial minor component [Type I fimbriae (VF0566) - Adherence (VFC0001)]

VFG041038(gb|NP\_251056) (PA2366) uricase [HSI-3 (VF0944) - Effector delivery system (VFC0086)] [Pseudomonas aeruginosa]

VFG012095(gb|WP\_003435012) (groEL) chaperonin GroEL [GroEL (VF0594) - Adherence (VFC0001)] [Clostridium difficile]

VFG038667(gb|WP\_016350054) (fliP) flagellar biosynthesis protein FliP [Polar flagella (VF0473) - Motility (VFC0204)]

VFG048229(gb|WP\_015875142) (fimB) tyrosine recombinase [Type I fimbriae (VF0566) - Adherence (VFC0001)]

VFG038436(gb|WP\_016352169) (tapC) type IV fimbrial assembly protein, PilC-like [Tap type IV pili (VF0475) - Adherence (VFC0001)]

VFG012333(gb|WP\_000703306) (sfaD) S fimbriae minor subunit SfaD [S fimbriae (VF0222) - Adherence (VFC0001)]

VFG034859(gb|WP\_010904544) (espX2) Type III secretion system effector EspX2 [TTSS secreted effectors (VF0083) - Effector delivery system (VFC0086)]

VFG002417(gb|WP\_001301550) (yagV/ecpE) E. coli common pilus chaperone EcpE [ECP (VF0404) - Adherence (VFC0001)]

VFG038301(gb|WP\_016349342) (exeK) general secretion pathway protein K [Exe T2SS (VF0478) - Effector delivery system (VFC0086)]

VFG038874(gb|WP\_005314263) (flgE) flagellar hook protein FlgE [Lateral flagella (VF0474) - Motility (VFC0204)]

VFG037807(gb|WP\_000013434) (lpxB) lipid-A-disaccharide synthase [LPS (VF0466) - Immune modulation (VFC0001)]

VFG000176(gb|NP\_251787) (xcpX) general secretion pathway protein K [Xcp secretion system (VF0084) - Effector delivery system (VFC0086)]

VFG046465(gb|WP\_003028672) (tufA) elongation factor Tu [EF-Tu (VF0460) - Adherence (VFC0001)] [Francisella tularensis]

VFG049018(gb|WP\_002913007) (rcsB) transcriptional regulator RcsB [RcsAB (VF0571) - Regulation (VFC0300)]

VFG038703(gb|WP\_011705289) (cheZ) chemotaxis protein CheZ [Polar flagella (VF0473) - Motility (VFC0204)]

VFG000903(gb|WP\_001045652) (pic) Pic serine protease precursor, autotransporter [Pic (VF0232) - Effector delivery system (VFC0086)]

VFG041261(gb|WP\_010946698) (lpg0963) Dot/Icm type IV secretion system effector [Dot/Icm T4SS secreted effectors (VF0083) - Effector delivery system (VFC0086)]

VFG001280(gb|WP\_000934435) (sdrD) Ser-Asp rich fibrinogen-binding bone sialoprotein-binding protein [SDR (VF0232) - Effector delivery system (VFC0086)]

VFG044159(gb|WP\_000125846) (fes) enterobactin/ferric enterobactin esterase [Enterobactin (VF0228) - Nutrition (VFC0001)]

VFG038277(gb|WP\_016349336) (exeE) general secretory pathway protein E [Exe T2SS (VF0478) - Effector delivery system (VFC0086)]

VFG006652(gb|WP\_001000225) (flgE) flagellar hook protein [Flagella (VF0051) - Motility (VFC0204)] [Helicobacter pylori]

VFG038880(gb|WP\_005314250) (lfgK) lateral flagellar hook-associated protein [Lateral flagella (VF0474) - Motility (VFC0204)]

VFG044330(gb|WP\_032447695) (ybtU) yersiniabactin biosynthesis oxidoreductase YbtU [Ybt (VF0564) - Nutrition (VFC0001)]

VFG000185(gb|NP\_250381) (pscU) type III secretion system protein PscU [TTSS (VF0083) - Effector delivery system (VFC0086)]

VFG001909(gb|YP\_002343979) (fliD) flagellar capping protein FliD [Flagella (VF0114) - Motility (VFC0204)]

VFG002166(gb|WP\_010714416) (ace) collagen adhesin protein [Ace (VF0355) - Adherence (VFC0001)] [Enterobacteriaceae]

VFG041031(gb|NP\_251049) (PA2359) transcriptional regulator [HSI-3 (VF0944) - Effector delivery system (VFC0086)]

VFG005361(gb|WP\_002352221) (spaP/pac) cell surface antigen SpaP [SpaP (VF0526) - Adherence (VFC0001)]

VFG035006(gb|WP\_001117988) (nleG-3) T3SS effector NleG family protein [TTSS secreted effectors (VF1111) - Effector delivery system (VFC0086)]

VFG034721(gb|WP\_000556298) (ibeC) phosphoethanolamine transferase CptA [Ibes (VF0237) - Invasion (VFC0001)]

VFG048632(gb|WP\_004176434) (vipA/tssB) type VI secretion system contractile sheath small subunit VipA [T6SS (VF0579) - Effector delivery system (VFC0086)]

VFG002056 (gspM) general secretion pathway protein M [T2SS (VF0333) - Effector delivery system (VFC0086)]

VFG012162(gb|WP\_011590241) (nanJ) exo-alpha-sialidase [Sialidase (VF0391) - Exoenzyme (VFC0251)] [Clostridium difficile]

VFG045474(gb|AAM75251) (cylM) CylM; cytolysin subunit modifier [Cytolysin (VF0356) - Exotoxin (VFC0235)]

VFG048643(gb|WP\_014907727) (vipB/tssC) type VI secretion system contractile sheath large subunit VipB [T6SS (VF0579) - Effector delivery system (VFC0086)]

VFG002178(gb|AAM75254) (cylI) cytolysin immunity protein [Cytolysin (VF0356) - Exotoxin (VFC0235)] [Enterobacteriaceae]

VFG001253(gb|NP\_249794) (fliH) flagellar assembly protein H [Flagella (VF0273) - Motility (VFC0204)] [Pseudomonas aeruginosa]

VFG046166(gb|NP\_819566) (CBU\_0534) Coxiella Dot/Icm type IVB secretion system translocated effector [T4SS secreted effectors (VF0083) - Effector delivery system (VFC0086)]

VFG000320(gb|WP\_001169234) (kdtB) lipopolysaccharide core biosynthesis protein [LPS (VF0056) - Immune modulation (VFC0001)]

VFG038176(gb|WP\_000777882) (ompA) outer membrane protein OmpA [OmpA (VF0464) - Immune modulation (VFC0001)]

VFG049917(gb|WP\_000508696) (rhs/PAAR) Type VI secretion system protein, PAAR family [T6SS (VF0579) - Effector delivery system (VFC0086)]

VFG000180(gb|NP\_251791) (xcpT) general secretion pathway protein G [Xcp secretion system (VF0084) - Effector delivery system (VFC0086)]

VFG000065(gb|WP\_010930832) (bscD) putative type III secretion protein [TTSS (VF0035) - Effector delivery system (VFC0086)]

VFG038631(gb|WP\_011705273) (fliG) flagellar motor switch protein G [Polar flagella (VF0473) - Motility (VFC00001)] [Streptococcus pneumoniae]

VFG000861(gb|WP\_001045649) (pic) Pic serine protease precursor, autotransporter [Pic (VF0218) - Effector delivery system (VFC00001)] [Streptococcus pneumoniae]

VFG048030(gb|WP\_003022143) (pdpC) Type VI secretion system secreted protein PdpC [T6SS (VF0544) - Effector delivery system (VFC00001)] [Streptococcus pneumoniae]

VFG048498(gb|WP\_012737619) (entF) enterobactin synthase subunit F [Ent (VF0562) - Nutritional/Metabolic factors (VFC00001)] [Streptococcus pneumoniae]

VFG002499(gb|WP\_004197164) (fliI) flagellum-specific ATP synthase FliI [Flagella (VF0430) - Motility (VFC00001)] [Streptococcus pneumoniae]

VFG000928(gb|WP\_000640938) (fepG) iron-enterobactin ABC transporter permease [Enterobactin (VF0228) - Nutritional/Metabolic factors (VFC00001)] [Streptococcus pneumoniae]

VFG051113(gb|WP\_080515433.1) (bigA) adhesin with a bacterial immunoglobulin-like domain [BigA (VF1344) - Adherence (VFC00001)] [Streptococcus pneumoniae]

VFG000875(gb|WP\_000066579) (fimC) Chaperone protein fimC precursor [Type 1 fimbriae (VF0221) - Adherence (VFC00001)] [Streptococcus pneumoniae]

VFG005299(gb|WP\_001233990) (pilA) tip adhesin PilA [PI-2a (VF0528) - Adherence (VFC00001)] [Streptococcus pneumoniae]

VFG038448(gb|WP\_016351632) (tapN) type IV pilus biogenesis protein PilN [Tap type IV pili (VF0475) - Adherence (VFC00001)] [Streptococcus pneumoniae]

VFG049915(gb|WP\_001142968) (hcp2/tssD2) Type VI secretion system protein, Hcp family [T6SS (VF0579) - Effector delivery system (VFC00001)] [Streptococcus pneumoniae]

VFG038812(gb|WP\_011706645) (cheR-3) chemotaxis protein CheR [Polar flagella (VF0473) - Motility (VFC00001)] [Streptococcus pneumoniae]

VFG000112(gb|NP\_253216) (pilB) type 4 fimbrial biogenesis protein PilB [Type IV pili (VF0082) - Adherence (VFC00001)] [Streptococcus pneumoniae]

VFG041020(gb|NP\_250353) (PA1662) ClpA/B-type protease [HSI-2 (VF0943) - Effector delivery system (VFC00001)] [Streptococcus pneumoniae]

VFG049912 (tssC) Type VI secretion system protein TssC [T6SS (VF0579) - Effector delivery system (VFC00001)] [Streptococcus pneumoniae]

VFG000923(gb|WP\_001034892) (fepA) ferrienterobactin outer membrane transporter [Enterobactin (VF0228) - Nutritional/Metabolic factors (VFC00001)] [Streptococcus pneumoniae]

VFG050158(gb|WP\_000905916) (kpsE) Capsule polysaccharide export inner-membrane protein [K1 capsule (VF0239) - Invasion (VFC00001)] [Streptococcus pneumoniae]

VFG038348(gb|WP\_005320755) (ascN) Type III secretion system ATPase [T3SS (VF0479) - Effector delivery system (VFC00001)] [Streptococcus pneumoniae]

VFG001252(gb|NP\_249793) (fliG) flagellar motor switch protein G [Flagella (VF0273) - Motility (VFC0204)] [Streptococcus pneumoniae]

VFG002480(gb|WP\_011205629) (tssH-5/clpV) Clp-type ATPase chaperone protein [T6SS-1 (VF0429) - Effector delivery system (VFC00001)] [Streptococcus pneumoniae]

VFG003561(gb|WP\_005173823) (yst1E) type II secretion system ATPase GspE [Yst1 T2SS (VF0635) - Effector delivery system (VFC00001)] [Streptococcus pneumoniae]

VFG037537(gb|WP\_000359621) (ACICU\_RS04605) YbaN family protein [HemO cluster (VF0636) - Nutritional/Metabolic factors (VFC00001)] [Streptococcus pneumoniae]

VFG043627(gb|WP\_000756959) (mrkA) type 3 fimbrial major pilin subunit MrkA [Type 3 fimbriae (VF0567) - Adherence (VFC00001)] [Streptococcus pneumoniae]

VFG041045(gb|NP\_251063) (PA2373) hypothetical protein [HSI-3 (VF0944) - Effector delivery system (VFC00001)] [Streptococcus pneumoniae]

VFG000630(gb|NP\_708742) (sigA) serine protease, autotransporter SigA [SigA (VF0119) - Exoenzyme (VFC0204)] [Streptococcus pneumoniae]

VFG043213(gb|WP\_005164494) (motA) flagellar motor protein MotA [Flagella (VF0394) - Motility (VFC0204)] [Streptococcus pneumoniae]

VFG005757(gb|WP\_001101136) (cfa/cfb) cAMP factor [CAMP factor (VF0280) - Exotoxin (VFC0235)] [Streptococcus pneumoniae]

VFG048409(gb|WP\_086074289) (entA) 2,3-dihydroxybenzoate-2,3-dehydrogenase [Ent (VF0562) - Nutritional/Metabolic factors (VFC00001)] [Streptococcus pneumoniae]

VFG001296(gb|WP\_000676533) (sspA) serine protease; V8 protease; glutamyl endopeptidase [V8 protease (VF0239) - Invasion (VFC00001)] [Streptococcus pneumoniae]

VFG049040(gb|WP\_074160401) (KP1\_RS17225) glycosyltransferase family 4 protein [LPS (VF0561) - Immune modulation (VFC0235)] [Streptococcus pneumoniae]

VFG048697(gb|WP\_015874721) (clpV/tssH) type VI secretion system ATPase TssH [T6SS (VF0569) - Effector delivery system (VFC00001)] [Streptococcus pneumoniae]

VFG048990(gb|WP\_001741945) (galF) GalU regulator GalF [Capsule (VF0560) - Immune modulation (VFC0235)] [Streptococcus pneumoniae]

VFG049155(gb|WP\_000829570) (clbI) colibactin polyketide synthase ClbI [Colibactin (VF0573) - Exotoxin (VFC0235)] [Streptococcus pneumoniae]

VFG045349(gb|WP\_000092542) (fdeC) adhesin FdeC [FdeC (VF0506) - Adherence (VFC00001)] [Escherichia coli]

VFG045788(gb|WP\_001189322) (cgsG) curli production assembly/transport protein CsgG [Curli fibers (VF1138) - Adherence (VFC00001)] [Escherichia coli]

VFG000040(gb|WP\_010930814) (bscW) Bordetella Bsc type III secretion system protein BscW [TTSS (VF0035) - Effector delivery system (VFC00001)] [Bordetella pertussis]

VFG050161(gb|WP\_000579525) (kpsC) Capsule polysaccharide export protein [K1 capsule (VF0239) - Invasion (VFC00001)] [Streptococcus pneumoniae]

VFG049900 (tssM) Type VI secretion system protein TssM [T6SS (VF0579) - Effector delivery system (VFC00001)] [Streptococcus pneumoniae]

VFG000905(gb|WP\_001546261) (hlyC) Hemolysin C [-Hemolysin (VF0225) - Exotoxin (VFC0235)] [Escherichia coli]

VFG000310(gb|WP\_001201399) (pseFG) CMP-N-acetylneuraminic acid synthetase [Flagellar glycosylation/Pseudomonas flagella (VF0273) - Motility (VFC0204)] [Pseudomonas aeruginosa]

VFG001259(gb|NP\_250137) (fliP) flagellar biosynthetic protein FliP [Flagella (VF0273) - Motility (VFC0204)] [Streptococcus pneumoniae]

VFG002417(gb|WP\_001301550) (yagV/ecpE) E. coli common pilus chaperone EcpE [ECP (VF0404) - Adherence (VFC00001)] [Escherichia coli]

VFG049095(gb|WP\_002912373) (rfbA) O-antigen export ABC transporter permease RfbA [LPS (VF0561) - Immune modulation (VFC0235)] [Escherichia coli]

VFG038533(gb|WP\_016350152) (flpF) traffic ATPase [Flp type IV pili (VF0476) - Adherence (VFC00001)] [Aeromonas hydrophila]

VFG001969(gb|YP\_002344824) (kfiD) UDP-glucose 6-dehydrogenase [Capsule (VF0323) - Immune modulation (VFC0235)] [Streptococcus pneumoniae]

VFG007478(gb|WP\_001234824) (fliE) flagellar hook-basal body protein [Flagella (VF0519) - Motility (VFC0204)] [Streptococcus pneumoniae]

VFG047672(gb|WP\_003021043) (argP) amino acid antiporter [ArgP (VF0557) - Nutritional/Metabolic factor (VF0557)]

VFG002412(gb|WP\_000716386) (yagY/ecpB) E. coli common pilus chaperone EcpB [ECP (VF0404) - Adherence (VFC0001)]

VFG038707(gb|WP\_016350059) (cheA-2) chemotaxis protein CheA [Polar flagella (VF0473) - Motility (VFC0204)]

VFG048708(gb|WP\_041168969) (vgrG/tssI) type VI secretion system tip protein VgrG [T6SS (VF0569) - Effector delivery (VFC0204)]

VFG001301(gb|WP\_000459062) (cap8E) type 8 capsular polysaccharide synthesis protein Cap8E [Capsule (VF0560) - Immune modulation (VFC0251)]

VFG002343(gb|WP\_042661457) (flgJ)  $\beta$ -N-acetylglucosaminidase [Flagella (VF0394) - Motility (VFC0204)]

VFG001928(gb|YP\_002344934) (pflA) paralysed flagellum protein [Flagella (VF0114) - Motility (VFC0204)]

VFG041118(gb|WP\_045606108) (tssA-5) Type VI secretion system protein TssA [T6SS-1 (VF0429) - Effector delivery (VFC0204)]

VFG048237(gb|WP\_002916189) (fimE) tyrosine recombinase [Type I fimbriae (VF0566) - Adherence (VFC0001)]

VFG045788(gb|WP\_001189322) (cgsG) curli production assembly/transport protein CsgG [Curli fibers (VF1138) - Adherence (VFC0001)]

VFG021876(gb|NP\_218393) (espI) ESX-1 secretion-associated protein EspI [ESX-1 (VF0315) - Effector delivery (VFC0204)]

VFG048755(gb|WP\_049127998) (icmF/tssM) type VI secretion protein TssM [T6SS (VF0569) - Effector delivery (VFC0204)]

VFG038768(gb|WP\_016351318) (flgL) flagellar hook-associated protein FlgL [Polar flagella (VF0473) - Motility (VFC0204)]

VFG013604 (hgbA) TonB-dependent hemoglobin/transferrin/lactoferrin family receptor [Hgp (VF0270) - Nutritional/Metabolic factor (VF0270)]

VFG038349(gb|WP\_005320751) (ascO) Type III secretion system protein AscO [T3SS (VF0479) - Effector delivery (VFC0204)]

VFG000080(gb|NP\_464522) (clpE) ATP-dependent protease [ClpE (VF0073) - Stress survival (VFC0282)] [Listeria monocytogenes (VF0073)]

VFG002280(gb|WP\_011010361) (nagK) hyaluronidase [Mu-toxin (VF0389) - Exoenzyme (VFC0251)] [Clostridium perfringens (VF0389)]

VFG000885(gb|WP\_000265729) (papD) chaperone protein PapD [P fimbriae (VF0220) - Adherence (VFC0001)]

VFG044165(gb|WP\_001041793) (entS) enterobactin exporter, iron-regulated [Enterobactin (VF0228) - Nutrition (VF0228)]

VFG010866(gb|WP\_010946593) (ccmB) ABC transporter involved in cytochrome c biogenesis, CcmB subunit [Cytochrome c (VF0101) - Immune modulation (VFC0251)]

VFG000423(gb|WP\_000052242) (vexE) Vi polysaccharide export protein VexE [Vi antigen (VF0101) - Immune modulation (VFC0251)]

VFG001803(gb|WP\_000608674) (seh) staphylococcal enterotoxin H precursor [SE (VF0020) - Exotoxin (VFC0235)]

VFG011757(gb|WP\_011117594) (virB4) Type IV secretion system protein VirB4 [Type IV secretion system (VF0117) - Adherence (VFC0001)]

VFG041017(gb|NP\_250350) (PA1659) hypothetical protein [HSI-2 (VF0943) - Effector delivery system (VFC0204)]

VFG002499(gb|WP\_004197164) (fliI) flagellum-specific ATP synthase FliI [Flagella (VF0430) - Motility (VFC0204)]

VFG038509(gb|WP\_016350158) (flpL) Flp pilus pseudopilin [Flp type IV pili (VF0476) - Adherence (VFC0001)]

VFG038342(gb|WP\_005320770) (ascV) Type III secretion system inner membrane export apparatus protein AscV [T3SS (VF0479) - Effector delivery (VFC0204)]

VFG049062(gb|WP\_015875020) (rfbD) UDP-galactopyranose mutase [LPS (VF0561) - Immune modulation (VFC0251)]

VFG038380(gb|WP\_043163044) (vipB) Type VI secretion system contractile sheath large subunit TssC/VipB [T6SS (VF0480) - Effector delivery (VFC0204)]

VFG038647(gb|WP\_016350053) (fliK) flagellar hook-length control protein FliK [Polar flagella (VF0473) - Motility (VFC0204)]

VFG002369(gb|WP\_011816869) (YE\_RS15450) hypothetical protein [O-antigen (VF0392) - Immune modulation (VFC0251)]

VFG001831(gb|WP\_010946191) (icmS) Dot/Icm type IV secretion system chaperone IcmS [Dot/Icm (VF0156) - Adherence (VFC0001)]

VFG001364(gb|WP\_001193686) (hysA) hyaluronidase [Hyaluronidase (VF0146) - Exoenzyme (VFC0251)] [Streptococcus pneumoniae (VF0146)]

VFG001241(gb|NP\_249774) (flgH) flagellar L-ring protein precursor FlgH [Flagella (VF0273) - Motility (VFC0204)]

VFG043014(gb|NP\_250149) (PA1458) two-component sensor [Flagella (VF0273) - Motility (VFC0204)] [Pseudomonas aeruginosa (VF0273)]

VFG001224(gb|NP\_249087) (pilU) twitching motility protein PilU [Type IV pili (VF0082) - Adherence (VFC0001)]

VFG000844(gb|WP\_001034100) (espP) autotransporter, serine protease [EspP (VF0208) - Effector delivery system (VFC0204)]

VFG043773(gb|YP\_398516) (bont) botulinum neurotoxin, BoNT [BoNT (VF0375) - Exotoxin (VFC0235)] [Clostridium botulinum (VF0375)]

VFG038389(gb|WP\_011705718) (atsK) Type VI secretion system protein [T6SS (VF0480) - Effector delivery system (VFC0204)]

VFG048841(gb|WP\_014907232) (wcaJ) undecaprenyl-phosphate glucose phosphotransferase [Capsule (VF0560) - Immune modulation (VFC0251)]

VFG038663(gb|WP\_005298795) (fliO) flagellar biosynthesis protein, FliO [Polar flagella (VF0473) - Motility (VFC0204)]

VFG000364(gb|WP\_000140406) (ybtA) transcriptional regulator YbtA [Yersiniabactin (VF0136) - Nutritional/Metabolic factor (VF0136)]

VFG002322(gb|WP\_011816590) (fliC) flagellin [Flagella (VF0394) - Motility (VFC0204)] [Yersinia enterocolitica (VF0394)]

VFG048990(gb|WP\_001741945) (galF) GalU regulator GalF [Capsule (VF0560) - Immune modulation (VFC0251)]

VFG048297(gb|WP\_014906961) (fimG) type 1 fimbrial minor component [Type I fimbriae (VF0566) - Adherence (VFC0001)]

VFG001146(gb|CAA83902) (hifC) membrane anchor [Haemagglutinating pili (VF0036) - Adherence (VFC0001)]

VFG001355(gb|WP\_000698569) (cbpD) choline binding protein D [Autolysin (VF0143) - Exoenzyme (VFC025)]

VFG002329(gb|WP\_005160381) (fliG) flagellar motor switch protein G [Flagella (VF0394) - Motility (VFC0204)]

VFG049073(gb|WP\_015875021) (KP1\_RS17240) DUF4422 domain-containing protein [LPS (VF0561) - Immune modulation (VFC0258)]

VFG001263(gb|NP\_250143) (flhA) flagellar biosynthesis protein FlhA [Flagella (VF0273) - Motility (VFC0204)]

VFG002335(gb|WP\_005160396) (fliM) flagellar motor switch protein FliM [Flagella (VF0394) - Motility (VFC0204)]

VFG013065(gb|WP\_024259428) (shuT) periplasmic binding protein ShuT [Shu (VF0256) - Nutritional/Metabolic factor (VFC0086)]

VFG007174(gb|WP\_011105906) (vscC) type III secretion system OM ring protein VscC [T3SS1 (VF0408) - Effector delivery system (VFC0086)]

VFG040545(gb|WP\_011190491) (sca1) cell surface antigen Scal [Scal (VF0498) - Adherence (VFC0001)] [Ricin (VF0567) - Immune modulation (VFC0258)]

VFG049144(gb|WP\_002892069) (acrB) acriflavine resistance protein B [AcrAB (VF0568) - Antimicrobial activity (VFC0001)]

VFG048409(gb|WP\_086074289) (entA) 2,3-dihydroxybenzoate-2,3-dehydrogenase [Ent (VF0562) - Nutritional/Metabolic factor (VFC0086)]

VFG048632(gb|WP\_004176434) (vipA/tssB) type VI secretion system contractile sheath small subunit VipA [T6SS (VF0429) - Effector delivery system (VFC0086)]

VFG002385(gb|NP\_218394) (eccD1) ESX-1 type VII secretion system EccD1 [ESX-1 (VF0315) - Effector delivery system (VFC0086)]

VFG049152(gb|WP\_000337350) (clbF) colibactin biosynthesis dehydrogenase ClbF [Colibactin (VF0573) - Exotoxin (VFC0235)]

VFG041432(gb|WP\_004683775) (vceC) type IV secretion system effector VceC [T4SS secreted effectors (VF0604) - Effector delivery system (VFC0086)]

VFG002056 (gspM) general secretion pathway protein M [T2SS (VF0333) - Effector delivery system (VFC0086)]

VFG002177(gb|AAM75253) (cylA) cytolysin activator [Cytolysin (VF0356) - Exotoxin (VFC0235)] [Enterococcus faecalis (VF0356) - Exotoxin (VFC0235)]

VFG000935(gb|WP\_001222189) (iroN) salmochelin receptor IroN [Salmochelin siderophore (VF0230) - Nutritional/Metabolic factor (VFC0086)]

VFG002521(gb|WP\_004525693) (flhF) flagellar biosynthesis regulator FlhF [Flagella (VF0430) - Motility (VFC0204)]

VFG037987(gb|WP\_000037963) (pseI) pseudaminic acid synthase [Capsule (VF0465) - Immune modulation (VFC0258)]

VFG013260(gb|WP\_010868968) (lgtC) glycosyltransferase [LOS (VF0044) - Immune modulation (VFC0258)] [LOS (VF0044) - Immune modulation (VFC0258)]

VFG002421(gb|WP\_000792571) (sbi) IgG-binding protein SBI [Sbi (VF0423) - Immune modulation (VFC0258)]

VFG000093(gb|WP\_000742753) (tcpQ) toxin-coregulated pilus (TCP) outer membrane protein TcpQ [TCP (VF0604) - Adherence (VFC0001)]

VFG001415(gb|NP\_218004) (lipF) Probable esterase/lipase LipF [LipF (VF0307) - Nutritional/Metabolic factor (VFC0086)]

VFG049161(gb|WP\_001029878) (clbO) colibactin polyketide synthase ClbO [Colibactin (VF0573) - Exotoxin (VFC0235)]

VFG049029(gb|WP\_014907241) (KP1\_RS17220) glycosyltransferase [LPS (VF0561) - Immune modulation (VFC0258)]

VFG002174(gb|WP\_002369251) (gelE) coccolysin [Gelatinase (VF0357) - Exoenzyme (VFC0251)] [Enterococcus faecalis (VF0357) - Exoenzyme (VFC0251)]

VFG012191(gb|WP\_011948511) (bont) botulinum neurotoxin, BoNT [BoNT (VF0375) - Exotoxin (VFC0235)] [Botulinum neurotoxin (VF0375) - Exotoxin (VFC0235)]

VFG043624(gb|WP\_004149659) (mrkD) fimbrial adhesin protein precursor MrkD [Type 3 fimbriae (VF0567) - Adherence (VFC0001)]

VFG038587(gb|WP\_016349160) (mshG) MSHA (mannose-sensitive hemagglutinin) pili biogenesis protein MshG [MSHA (VF0567) - Adherence (VFC0001)]

VFG038868(gb|WP\_005314282) (lfiJ) lateral flagellar protein, LfiJ [Lateral flagella (VF0474) - Motility (VFC0204)]

VFG002415(gb|WP\_001131063) (yagX/ecpC) E. coli common pilus usher EcpC [ECP (VF0404) - Adherence (VFC0001)]

VFG042734(gb|NP\_249343) (vfr) cAMP-regulatory protein [Type IV pili (VF0082) - Adherence (VFC0001)] [Pilin (VF0082) - Adherence (VFC0001)]

VFG002480(gb|WP\_011205629) (tssH-5/clpV) Clp-type ATPase chaperone protein [T6SS-1 (VF0429) - Effector delivery system (VFC0086)]

VFG011826(gb|YP\_002343512) (fliK) flagellar hook-length control protein FliK [Flagella (VF0114) - Motility (VFC0204)]

VFG002507(gb|WP\_004534277) (flgA) flagellar basal body P-ring biosynthesis protein FlgA [Flagella (VF0430) - Motility (VFC0204)]

VFG038460(gb|WP\_043119325) (tapQ) type IV pilus secretin PilQ [Tap type IV pili (VF0475) - Adherence (VFC0001)]

VFG041237(gb|WP\_010945887) (cegC2) Dot/Icm type IV secretion system effector CegC2 [Dot/Icm T4SS secreted effectors (VF0604) - Effector delivery system (VFC0086)]

VFG001447(gb|CAA50007) (cnf1) cytotoxic necrotizing factor 1 [CNF-1 (VF0240) - Exotoxin (VFC0235)] [Enterococcus faecalis (VF0240) - Exotoxin (VFC0235)]

VFG002244(gb|WP\_011181141) (bepC) Bartonella effector protein BepC [VirB/VirD4 T4SS secreted effectors (VF0604) - Effector delivery system (VFC0086)]

VFG000924(gb|WP\_001234311) (fepB) ferrienterobactin ABC transporter periplasmic binding protein [Enterobacteriaceae (VF0604) - Effector delivery system (VFC0086)]

VFG048985(gb|WP\_014907219) (KP1\_RS17355) phosphatase PAP2 family protein [Capsule (VF0560) - Immune modulation (VFC0258)]

VFG002353(gb|WP\_005168786) (flgM) negative regulator of flagellin synthesis [Flagella (VF0394) - Motility (VFC0204)]

VFG045467(gb|WP\_011204972) (cdpA) cyclic di-GMP phosphodiesterase [CdpA (VF0432) - Regulation (VFC0001)]

VFG001212(gb|NP\_253246) (pilE) type 4 fimbrial biogenesis protein Pile [Type IV pili (VF0082) - Adherence (VFC0001)]

VFG044443(gb|WP\_001032773) (harA) haptoglobin-binding heme uptake protein HarA [Isd (VF0015) - Nutritional/Metabolic factor (VFC0086)]

VFG000998(gb|NP\_858272) (mxiJ) type III secretion system inner MS ring protein MxiJ [TTSS (VF0118) - Effector delivery system (VFC0086)]

VFG002497(gb|WP\_011204776) (fliK) flagellar hook-length control protein FliK [Flagella (VF0430) - Motility (VFC0204)] [Pseudomonas aeruginosa (VF0114)]

VFG011414(gb|WP\_002964262) (kdsA) 2-dehydro-3-deoxyphosphooctonate aldolase [LPS (VF0367) - Immune modulation (VFC0258)] [Pseudomonas aeruginosa (VF0114)]

VFG038776(gb|WP\_016351320) (flgJ) flagellar rod assembly protein/muramidase FlgJ [Polar flagella (VF0473) - Motility (VFC0204)] [Aeromonas salmonicida (VF0474)]

VFG002495(gb|WP\_004199882) (fliQ) flagellar biosynthesis protein FliQ [Flagella (VF0430) - Motility (VFC0204)] [Pseudomonas aeruginosa (VF0114)]

VFG050386(gb|WP\_000355489.1) (pilT) type IV pilus twitching motility protein PilT [TFP (VF1334) - Adherence (VFC0001)] [Pseudomonas aeruginosa (VF0114)]

VFG041304(gb|WP\_010947678) (lirB) Dot/Icm type IV secretion system effector LirB [Dot/Icm T4SS secreted effectors (VF0566) - Adherence (VFC0001)] [Pseudomonas aeruginosa (VF0114)]

VFG038836(gb|WP\_011707085) (pomA2) chemotaxis protein PomA [Polar flagella (VF0473) - Motility (VFC0204)] [Aeromonas salmonicida (VF0474)]

VFG050946(gb|WP\_000083625.1) (tssL) type IVB secretion system protein TssL [T6SS (VF1337) - Effector delivery system (VFC0001)] [Pseudomonas aeruginosa (VF0114)]

VFG002380(gb|NP\_218385) (eccA1) ESX-1 type VII secretion system AAA+ ATPase EccA1 [ESX-1 (VF0315) - Effector delivery system (VFC0001)] [Mycobacterium tuberculosis (VF0315)]

VFG050757(gb|WP\_001166319.1) (gspE1) general secretion pathway protein E [T2SS (VF1335) - Effector delivery system (VFC0001)] [Pseudomonas aeruginosa (VF0114)]

VFG042736(gb|NP\_253152) (rpoN) RNA polymerase factor sigma-54 [Type IV pili (VF0082) - Adherence (VFC0001)] [Pseudomonas aeruginosa (VF0114)]

VFG041021(gb|NP\_250354) (PA1663) transcriptional regulator [HSI-2 (VF0943) - Effector delivery system (VFC0001)] [Pseudomonas aeruginosa (VF0114)]

VFG037762(gb|WP\_000078878) (lpxL) lauroyl acyltransferase [LPS (VF0466) - Immune modulation (VFC0258)] [Pseudomonas aeruginosa (VF0114)]

VFG038784(gb|WP\_011706638) (flgH) flagellar basal body L-ring protein [Polar flagella (VF0473) - Motility (VFC0204)] [Aeromonas salmonicida (VF0474)]

VFG048771(gb|WP\_004190505) (tssF) type VI secretion system baseplate subunit TssF [T6SS (VF0569) - Effector delivery system (VFC0001)] [Pseudomonas aeruginosa (VF0114)]

VFG000937(gb|WP\_000750139) (iucD) L-lysine 6-monooxygenase IucD [Aerobactin (VF0229) - Nutritional/Metabolic factor (VFC0001)] [Pseudomonas aeruginosa (VF0114)]

VFG001917(gb|YP\_002344286) (flgL) flagellar hook-associated protein FlgL [Flagella (VF0114) - Motility (VFC0204)] [Pseudomonas aeruginosa (VF0114)]

VFG037807(gb|WP\_000013434) (lpxB) lipid-A-disaccharide synthase [LPS (VF0466) - Immune modulation (VFC0258)] [Pseudomonas aeruginosa (VF0114)]

VFG041012(gb|NP\_250202) (PA1511) hypothetical protein [HSI-2 (VF0943) - Effector delivery system (VFC0001)] [Pseudomonas aeruginosa (VF0114)]

VFG000120(gb|NP\_253949) (algZ) sigma factor AlgU [Alginate (VF0091) - Biofilm (VFC0271)] [Pseudomonas aeruginosa (VF0114)]

VFG000939(gb|WP\_001287497) (iucB) aerobactin siderophore biosynthesis protein IucB [Aerobactin (VF0229) - Nutritional/Metabolic factor (VFC0001)] [Pseudomonas aeruginosa (VF0114)]

VFG048980(gb|WP\_041937790) (KP1\_RS17345) capsule assembly Wzi family protein [Capsule (VF0560) - Immune modulation (VFC0258)] [Pseudomonas aeruginosa (VF0114)]

VFG049159(gb|WP\_014907260) (clbM) precolibactin export MATE transporter ClbM [Colibactin (VF0573) - Effector delivery system (VFC0001)] [Pseudomonas aeruginosa (VF0114)]

VFG000931(gb|WP\_001336900) (entC) isochorismate synthase 1 [Enterobactin (VF0228) - Nutritional/Metabolic factor (VFC0001)] [Pseudomonas aeruginosa (VF0114)]

VFG049904 (clpV/tssH) Type VI secretion system ATPase ClpV/TssH [T6SS (VF0579) - Effector delivery system (VFC0001)] [Pseudomonas aeruginosa (VF0114)]

VFG045523(gb|WP\_010947178) (LPG\_RS07260) Dot/Icm type IV secretion system effector [Dot/Icm T4SS secreted effectors (VF0566) - Adherence (VFC0001)] [Pseudomonas aeruginosa (VF0114)]

VFG045567(gb|WP\_010948074) (LPG\_RS11920) Dot/Icm type IV secretion system effector [Dot/Icm T4SS secreted effectors (VF0566) - Adherence (VFC0001)] [Pseudomonas aeruginosa (VF0114)]

VFG038885(gb|WP\_005314224) (lafX) LafX [Lateral flagella (VF0474) - Motility (VFC0204)] [Aeromonas salmonicida (VF0474)]

VFG034859(gb|WP\_010904544) (espX2) Type III secretion system effector EspX2 [TTSS secreted effectors (VF0566) - Adherence (VFC0001)] [Pseudomonas aeruginosa (VF0114)]

VFG041043(gb|NP\_251061) (PA2371) ClpA/B-type protease [HSI-3 (VF0944) - Effector delivery system (VFC0001)] [Pseudomonas aeruginosa (VF0114)]

VFG002409(gb|WP\_000549274) (essC) type VII secretion system protein EssC, FtsK/SpoIIIE family ATPase [Type VII secretion system (VF0315) - Effector delivery system (VFC0001)] [Mycobacterium tuberculosis (VF0315)]

VFG001896(gb|YP\_002343653) (fliI) flagellum-specific ATP synthase FliI [Flagella (VF0114) - Motility (VFC0204)] [Pseudomonas aeruginosa (VF0114)]

VFG045626(gb|WP\_014748741) (scm) collagen adhesin protein Scm [Scm (VF0418) - Adherence (VFC0001)] [Pseudomonas aeruginosa (VF0114)]

VFG038845(gb|WP\_016351249) (nueA) NeuA protein [Polar flagella (VF0473) - Motility (VFC0204)] [Aeromonas salmonicida (VF0474)]

VFG001960(gb|YP\_002344815) (Cj1432c) sugar transferase [Capsule (VF0323) - Immune modulation (VFC0258)] [Pseudomonas aeruginosa (VF0114)]

VFG038855(gb|WP\_005314317) (lfiM) lateral flagellar motor switch protein, LfiM [Lateral flagella (VF0474) - Motility (VFC0204)] [Aeromonas salmonicida (VF0474)]

VFG038756(gb|WP\_011706626) (flrC) transcriptional activator [Polar flagella (VF0473) - Motility (VFC0204)] [Aeromonas salmonicida (VF0474)]

VFG045794(gb|WP\_000992818) (csgC) curli assembly protein CsgC [Curli fibers (VF1138) - Adherence (VFC0001)] [Pseudomonas aeruginosa (VF0114)]

VFG002166(gb|WP\_010714416) (ace) collagen adhesin protein [Ace (VF0355) - Adherence (VFC0001)] [Enterobacteriaceae (VF0355)]

VFG048307(gb|WP\_041937815) (fimH) type 1 fimbrial adhesin precursor [Type I fimbriae (VF0566) - Adherence (VFC0001)] [Pseudomonas aeruginosa (VF0114)]

VFG044329(gb|WP\_015874964) (irp1) yersiniabactin polyketide synthase HMWP1 [Ybt (VF0564) - Nutritional/Metabolic factor (VFC0001)] [Yersinia enterocolitica (VF0564)]

VFG000165(gb|NP\_252915) (pchF) pyochelin synthetase PchF [Pyochelin (VF0095) - Nutritional/Metabolic factor (VFC0001)] [Pseudomonas aeruginosa (VF0114)]

VFG048620(gb|WP\_014907843) (iutA) ferric aerobactin receptor IutA [Aerobactin (VF0565) - Nutritional/Metabolic factor (VFC0001)] [Pseudomonas aeruginosa (VF0114)]

VFG038409(gb|WP\_011704492) (fimA) fimbrial protein [Type I pili (VF0486) - Adherence (VFC0001)] [Aeromonas salmonicida (VF0486)]

VFG051070(gb|WP\_001066523.1) (tssC) type VI secretion system contractile sheath large subunit [T6SS (VF1337) - Effector delivery system (VFC0001)] [Pseudomonas aeruginosa (VF0114)]

VFG049122(gb|WP\_012737539) (allC) allantoin amidohydrolase [Allantoin utilization (VF0572) - Nutritional/Metabolic factor (VFC0001)] [Pseudomonas aeruginosa (VF0114)]

VFG002481(gb|WP\_009940775) (vgrG-5) Type VI secretion system protein VgrG5 [T6SS-1 (VF0429) - Effector delivery system (VFC0086)] [Yersinia enterocolitica]

VFG000142(gb|NP\_253698) (waaC) 3-deoxy-D-manno-octulosonic-acid (KDO) transferase [LPS (VF0085) - Immune modulation (VFC0086)] [Yersinia enterocolitica]

VFG038261(gb|WP\_016352107) (exeA) general secretion pathway protein A [Exe T2SS (VF0478) - Effector delivery system (VFC0086)] [Yersinia enterocolitica]

VFG038376(gb|WP\_164927604) (atsD) Type VI secretion system protein [T6SS (VF0480) - Effector delivery system (VFC0086)] [Yersinia enterocolitica]

VFG001252(gb|NP\_249793) (fliG) flagellar motor switch protein G [Flagella (VF0273) - Motility (VFC0204)] [Yersinia enterocolitica]

VFG000368(gb|WP\_000703040) (ybtS) salicylate synthase Irp9 [Yersiniabactin (VF0136) - Nutritional/Metabolic (VFC0086)] [Yersinia enterocolitica]

VFG049835(gb|WP\_012076956) (exlA) hemolysin [Exolysin (VF0582) - Effector delivery system (VFC0086)] [Yersinia enterocolitica]

VFG000871(gb|WP\_000790574) (fimB) Type 1 fimbriae Regulatory protein fimB [Type 1 fimbriae (VF0221) - Adherence (VFC0001)] [Yersinia enterocolitica]

VFG050787(gb|WP\_001112089.1) (gspF) general secretion pathway protein F [T2SS (VF1335) - Effector delivery system (VFC0086)] [Yersinia enterocolitica]

VFG001405(gb|NP\_217219) (sigA/rpoV) RNA polymerase sigma factor SigA [SigA (VF0257) - Regulation (VFC0086)] [Yersinia enterocolitica]

VFG000874(gb|WP\_000824100) (fimI) Fimbrin-like protein fimI precursor [Type 1 fimbriae (VF0221) - Adherence (VFC0001)] [Yersinia enterocolitica]

VFG005586(gb|WP\_010922241) (hylA) hyaluronidase [Hyaluronidase (VF0246) - Exoenzyme (VFC0251)] [Streptococcus pneumoniae]

VFG037288(gb|WP\_000603876) (basG) acinetobactin biosynthesis protein BasF [Acinetobactin (VF0467) - Nutritional/Metabolic (VFC0086)] [Acinetobacter baumannii]

VFG035062(gb|WP\_000951026) (nleH1) Type III secretion system effector NleH1 [TTSS secreted effectors (VF0222) - Effector delivery system (VFC0086)] [Shigella flexneri]

VFG042568(gb|WP\_000012016) (sfaY) transcriptional regulator SfaY [F1C fimbriae (VF0224) - Adherence (VFC0001)] [Shigella flexneri]

VFG041329(gb|WP\_010948104) (legL7) Dot/Icm type IV secretion system effector LegL7 [Dot/Icm T4SS secreted effectors (VF0223) - Effector delivery system (VFC0086)] [Shigella flexneri]

VFG050625(gb|WP\_000389061.1) (pilG) twitching motility response regulator PilG [TFP (VF1334) - Adherence (VFC0001)] [Shigella flexneri]

VFG005009(gb|WP\_001043551) (sec) staphylococcal enterotoxin C precursor [SE (VF0020) - Exotoxin (VFC0235)] [Staphylococcus aureus]

VFG048348(gb|WP\_004149658) (mrkJ) phosphodiesterase [Type 3 fimbriae (VF0567) - Biofilm (VFC0271)] [Klebsiella pneumoniae]

VFG038378(gb|WP\_011705712) (vipA) Type VI secretion system contractile sheath small subunit TssB/VipA [T6SS-1 (VF0429) - Effector delivery system (VFC0086)] [Klebsiella pneumoniae]

VFG000889(gb|WP\_000113351) (papF) P pilus minor subunit PapF [P fimbriae (VF0220) - Adherence (VFC0001)] [Klebsiella pneumoniae]

VFG045563(gb|WP\_010948017) (ceg28) Dot/Icm type IV secretion system effector Ceg28 [Dot/Icm T4SS secreted effectors (VF0223) - Effector delivery system (VFC0086)] [Klebsiella pneumoniae]

VFG038273(gb|WP\_016349335) (exeD) general secretion pathway protein D [Exe T2SS (VF0478) - Effector delivery system (VFC0086)] [Klebsiella pneumoniae]

VFG037482(gb|WP\_004748062) (ACICU\_RS04570) sigma-70 family RNA polymerase sigma factor [HemO cluster (VF0225) - Exotoxin (VFC0235)] [Klebsiella pneumoniae]

VFG038808(gb|WP\_011706644) (flgB) flagellar basal-body rod protein FlgB [Polar flagella (VF0473) - Motility (VFC0204)] [Klebsiella pneumoniae]

VFG002427(gb|WP\_004549962) (pilC) type IV pilus assembly protein PilC [Type IV pili (VF0431) - Adherence (VFC0001)] [Klebsiella pneumoniae]

VFG002198(gb|WP\_003850266) (tox) Diphtheria toxin precursor [DT (VF0363) - Exotoxin (VFC0235)] [Corynebacterium diphtheriae]

VFG001261(gb|NP\_250139) (fliR) flagellar biosynthetic protein FliR [Flagella (VF0273) - Motility (VFC0204)] [Corynebacterium diphtheriae]

VFG044323(gb|WP\_015874960) (ybtS) yersiniabactin biosynthesis salicylate synthase YbtS [Ybt (VF0564) - Nutritional/Metabolic (VFC0086)] [Yersinia enterocolitica]

VFG038887(gb|WP\_005314220) (lafF) LafF [Lateral flagella (VF0474) - Motility (VFC0204)] [Aeromonas salmonicida]

VFG000616(gb|NP\_709455) (iucB) aerobactin synthesis protein IucB [Aerobactin (VF0123) - Nutritional/Metabolic (VFC0086)] [Aeromonas salmonicida]

VFG000923(gb|WP\_001034892) (fepA) ferrienterobactin outer membrane transporter [Enterobactin (VF0228) - Nutritional/Metabolic (VFC0086)] [Aeromonas salmonicida]

VFG000907(gb|WP\_000376545) (hlyB) Hemolysin B [-Hemolysin (VF0225) - Exotoxin (VFC0235)] [Escherichia coli]

VFG038864(gb|WP\_073531776) (fliF) flagellar MS-ring protein [Lateral flagella (VF0474) - Motility (VFC0204)] [Escherichia coli]

VFG039991(gb|WP\_011190506) (rvhB6b) VirB6-like protein of the type IV secretion system [Rvh T4SS (VF0431) - Adherence (VFC0001)] [Escherichia coli]

VFG048449(gb|WP\_012737621) (fepB) iron-enterobactin transporter periplasmic binding protein [Ent (VF0562) - Nutritional/Metabolic (VFC0086)] [Escherichia coli]

VFG001225(gb|NP\_249099) (pilG) twitching motility protein PilG [Type IV pili (VF0082) - Adherence (VFC0001)] [Escherichia coli]

VFG038590(gb|WP\_043118275) (mshE) ATPase protein MshE, GspE-like [MSHA type IV pili (VF0477) - Adherence (VFC0001)] [Escherichia coli]

VFG000918(gb|WP\_001312167) (chuT) periplasmic heme-binding protein ChuT [Chu (VF0227) - Nutritional/Metabolic (VFC0086)] [Escherichia coli]

VFG038679(gb|WP\_016350055) (flhB) flagellar biosynthetic protein FlhB [Polar flagella (VF0473) - Motility (VFC0204)] [Escherichia coli]

VFG049133(gb|WP\_004177236) (acrA) acriflavine resistance protein A [AcrAB (VF0568) - Antimicrobial activity (VFC0086)] [Escherichia coli]

VFG002416(gb|WP\_001265657) (yagW/ecpD) polymerized tip adhesin of ECP fibers [ECP (VF0404) - Adherence (VFC0001)] [Escherichia coli]

VFG049051(gb|WP\_014907239) (KP1\_RS17230) glycosyltransferase [LPS (VF0561) - Immune modulation (VFC0086)] [Escherichia coli]

VFG048528(gb|WP\_004183335) (entD) enterochelin synthetase component D [Ent (VF0562) - Nutritional/Metabolic (VFC0086)] [Escherichia coli]

VFG000944(gb|AAK16477) (draC) usher protein DraC [Dr adhesins (VF0223) - Adherence (VFC0001)] [Escherichia coli]

VFG000919(gb|WP\_001095619) (chuW) Putative oxygen independent coproporphyrinogen III oxidase [Chu (VF0227) - Nutritional/Metabolic (VFC0086)] [Escherichia coli]

VFG001269(gb|WP\_010929996) (*cyaB*) cyclolysin secretion ATP-binding protein [Cya (VF0028) - Exotoxin (VF0028) - Exotoxin (VF0028)] [Cya (VF0028) - Exotoxin (VF0028)]  
VFG000051(gb|WP\_010930821) (*bscJ*) Bordetella Bsc type III secretion system protein BscJ [TTSS (VF0035) - Exotoxin (VF0035) - Exotoxin (VF0035)] [BscJ (VF0035) - Exotoxin (VF0035)]  
VFG048459(gb|WP\_004147525) (*entS*) enterobactin exporter EntS [Ent (VF0562) - Nutritional/Metabolic factor (VF0562) - Nutritional/Metabolic factor (VF0562)] [Ent (VF0562) - Nutritional/Metabolic factor (VF0562)]  
VFG002277(gb|WP\_011009663) (*nagH*) hyaluronidase [Mu-toxin (VF0389) - Exoenzyme (VFC0251)] [Clostridium (VF0389) - Exoenzyme (VFC0251)]  
VFG000114(gb|NP\_253218) (*xcpA/pilD*) type 4 prepilin peptidase PilD [Type IV pili (VF0082) - Adherence (VF0082) - Adherence (VF0082)] [Type IV pili (VF0082) - Adherence (VF0082)]  
VFG000908(gb|WP\_000860472) (*hlyD*) Hemolysin D [-Hemolysin (VF0225) - Exotoxin (VFC0235)] [Escherichia (VF0225) - Exotoxin (VFC0235)]  
VFG007953(gb|NP\_217474) (Rv2958c) PGL/p-HBAD biosynthesis glycosyltransferase [PDIM (VF0309) - Immune modulation (VF0309) - Immune modulation (VF0309)] [PDIM (VF0309) - Immune modulation (VF0309)]  
VFG043642(gb|WP\_011205946) (MHP\_RS00555) P110/LppT family adhesin N-terminal domain [P97/P102 pair (VF0102) - Adherence (VFC0251) - Adherence (VFC0251)] [P97/P102 pair (VF0102) - Adherence (VFC0251)]  
VFG045791(gb|WP\_000481500) (*cgsD*) transcriptional regulator CsgD [Curli fibers (VF1138) - Adherence (VFC0251) - Adherence (VFC0251)] [Curli fibers (VF1138) - Adherence (VFC0251)]  
VFG002278(gb|WP\_011010095) (*nagI*) hyaluronidase [Mu-toxin (VF0389) - Exoenzyme (VFC0251)] [Clostridium (VF0389) - Exoenzyme (VFC0251)]  
VFG002189(gb|WP\_002359680) (*cpsB/cdsA*) phosphatidate cytidyltransferase [Capsule (VF0361) - Immune modulation (VF0361) - Immune modulation (VF0361)] [Capsule (VF0361) - Immune modulation (VF0361)]  
VFG001862(gb|WP\_015444101) (*katB*) catalase-peroxidase KatB [KatAB (VF0168) - Stress survival (VFC0282) - Stress survival (VFC0282)] [KatAB (VF0168) - Stress survival (VFC0282)]  
VFG000881(gb|WP\_000930062) (*papB*) regulatory protein PapB [P fimbriae (VF0220) - Adherence (VFC0001) - Adherence (VFC0001)] [P fimbriae (VF0220) - Adherence (VFC0001)]  
VFG034721(gb|WP\_000556298) (*ibeC*) phosphoethanolamine transferase CptA [Ibes (VF0237) - Invasion (VFC0237) - Invasion (VFC0237)] [Ibes (VF0237) - Invasion (VFC0237)]  
VFG002341(gb|WP\_005168813) (*flgL*) flagellar hook-associated protein 3 FlgL [Flagella (VF0394) - Motility (VFC0237) - Motility (VFC0237)] [Flagella (VF0394) - Motility (VFC0237)]  
VFG038860(gb|WP\_005314298) (*lfhB*) lateral flagellar biosynthetic protein, LfhB [Lateral flagella (VF0474) - Motility (VFC0237) - Motility (VFC0237)] [Lateral flagella (VF0474) - Motility (VFC0237)]  
VFG043016(gb|NP\_250155) (PA1464) purine-binding chemotaxis protein [Flagella (VF0273) - Motility (VFC0237) - Motility (VFC0237)] [Flagella (VF0273) - Motility (VFC0237)]  
VFG038269(gb|WP\_075384415) (*exeC*) general secretion pathway protein C [Exe T2SS (VF0478) - Effector delivery (VFC0237) - Effector delivery (VFC0237)] [Exe T2SS (VF0478) - Effector delivery (VFC0237)]  
VFG000934(gb|WP\_000348393) (*entA*) 2,3-dihydro-2,3-dihydroxybenzoate dehydrogenase EntA [Enterobactin (VF0562) - Nutritional/Metabolic factor (VF0562) - Nutritional/Metabolic factor (VF0562)] [Enterobactin (VF0562) - Nutritional/Metabolic factor (VF0562)]  
VFG038866(gb|WP\_005314286) (*lfiH*) lateral flagellar assembly protein FliH [Lateral flagella (VF0474) - Motility (VFC0237) - Motility (VFC0237)] [Lateral flagella (VF0474) - Motility (VFC0237)]  
VFG013286(gb|WP\_005694325) (*galE*) UDP-glucose 4-epimerase [LOS (VF0044) - Immune modulation (VFC0237) - Immune modulation (VFC0237)] [LOS (VF0044) - Immune modulation (VFC0237)]  
VFG000121(gb|NP\_249453) (*algU*) alginate biosynthesis protein AlgZ/FimS [Alginate (VF0091) - Biofilm (VFC0237) - Biofilm (VFC0237)] [Alginate (VF0091) - Biofilm (VFC0237)]  
VFG034928(gb|WP\_001239082) (*lifA/efa1*) lymphostatin Efa1/LifA [Lymphostatin/LifA (VF0175) - Effector delivery (VFC0237) - Effector delivery (VFC0237)] [Lymphostatin/LifA (VF0175) - Effector delivery (VFC0237)]  
VFG002338(gb|WP\_042661456) (*fliP*) flagellar biosynthetic protein FliP [Flagella (VF0394) - Motility (VFC0237) - Motility (VFC0237)] [Flagella (VF0394) - Motility (VFC0237)]  
VFG041045(gb|NP\_251063) (PA2373) hypothetical protein [HSI-3 (VF0944) - Effector delivery system (VFC0237) - Effector delivery system (VFC0237)] [HSI-3 (VF0944) - Effector delivery system (VFC0237)]  
VFG038391(gb|WP\_011705719) (*atsL*) Type VI secretion system protein [T6SS (VF0480) - Effector delivery system (VFC0237) - Effector delivery system (VFC0237)] [T6SS (VF0480) - Effector delivery system (VFC0237)]  
VFG000911(gb|WP\_000975445) (*focC*) F1C periplasmic chaperone [F1C fimbriae (VF0224) - Adherence (VFC0237) - Adherence (VFC0237)] [F1C fimbriae (VF0224) - Adherence (VFC0237)]  
VFG000453(gb|NP\_462538) (*lpfD*) long polar fimbrial protein LpfD [Lpf (VF0105) - Adherence (VFC0001)] [S (VF0105) - Adherence (VFC0001)] [Lpf (VF0105) - Adherence (VFC0001)]  
VFG047708(gb|WP\_003022611) (*carB*) carbamoyl phosphate synthase large subunit [Pyrimidine biosynthesis (VF0091) - Biofilm (VFC0237) - Biofilm (VFC0237)] [Pyrimidine biosynthesis (VF0091) - Biofilm (VFC0237)]  
VFG038375(gb|WP\_011705710) (*atsC*) Type VI secretion system protein [T6SS (VF0480) - Effector delivery system (VFC0237) - Effector delivery system (VFC0237)] [T6SS (VF0480) - Effector delivery system (VFC0237)]  
VFG002164(gb|WP\_002395058) (*prgB/asc10*) aggregation substance PrgB/Asc10 [AS (VF0352) - Adherence (VFC0237) - Adherence (VFC0237)] [AS (VF0352) - Adherence (VFC0237)]  
VFG038861(gb|WP\_005314296) (*lfhA*) lateral flagellar biosynthesis protein [Lateral flagella (VF0474) - Motility (VFC0237) - Motility (VFC0237)] [Lateral flagella (VF0474) - Motility (VFC0237)]  
VFG007023(gb|WP\_149591715) (*rtxB*) RTX toxin transporter RtxB [MARTX (VF0265) - Exotoxin (VFC0235) - Exotoxin (VFC0235)] [MARTX (VF0265) - Exotoxin (VFC0235)]  
VFG049007(gb|WP\_002911561) (*rcaA*) transcriptional activator for ctr capsule biosynthesis [RcsAB (VF0571) - Nutritional/Metabolic factor (VF0571) - Nutritional/Metabolic factor (VF0571)] [RcsAB (VF0571) - Nutritional/Metabolic factor (VF0571)]  
VFG048654(gb|WP\_004224345) (*vasE/tssK*) type VI secretion system baseplate subunit TssK [T6SS (VF0569) - Effector delivery system (VFC0237) - Effector delivery system (VFC0237)] [T6SS (VF0569) - Effector delivery system (VFC0237)]  
VFG000402(gb|WP\_002212923) (*yscC*) type III secretion system secretin YscC [TTSS (VF0140) - Effector delivery system (VFC0237) - Effector delivery system (VFC0237)] [TTSS (VF0140) - Effector delivery system (VFC0237)]  
VFG038480(gb|WP\_016349429) (*tppB*) type IV pilus pseudopilin [Tap type IV pili (VF0475) - Adherence (VFC0237) - Adherence (VFC0237)] [Tap type IV pili (VF0475) - Adherence (VFC0237)]  
VFG000822(gb|WP\_000605370) (*glrR*) type III secretion system LEE GrlA-binding negative regulator GrlR [TTSS (VF0140) - Effector delivery system (VFC0237) - Effector delivery system (VFC0237)] [TTSS (VF0140) - Effector delivery system (VFC0237)]  
VFG002055(gb|WP\_000097229) (*gspL*) general secretion pathway protein L [T2SS (VF0333) - Effector delivery system (VFC0237) - Effector delivery system (VFC0237)] [T2SS (VF0333) - Effector delivery system (VFC0237)]  
VFG038436(gb|WP\_016352169) (*tapC*) type IV fimbrial assembly protein, PilC-like [Tap type IV pili (VF0475) - Adherence (VFC0237) - Adherence (VFC0237)] [Tap type IV pili (VF0475) - Adherence (VFC0237)]  
VFG037852(gb|WP\_001075965) (ACICU\_RS00395) polysaccharide biosynthesis tyrosine autokinase [Capsule (VF0562) - Nutritional/Metabolic factor (VF0562) - Nutritional/Metabolic factor (VF0562)] [Capsule (VF0562) - Nutritional/Metabolic factor (VF0562)]  
VFG050328(gb|WP\_000201227.1) (*pilN*) PilN domain-containing protein [TFP (VF1334) - Adherence (VFC0001) - Adherence (VFC0001)] [TFP (VF1334) - Adherence (VFC0001)]  
VFG048439(gb|WP\_014907941) (*entC*) isochorismate synthase [Ent (VF0562) - Nutritional/Metabolic factor (VF0562) - Nutritional/Metabolic factor (VF0562)] [Ent (VF0562) - Nutritional/Metabolic factor (VF0562)]  
VFG038889(gb|WP\_005314215) (*lafT*) LafT, flagella motor stator protein [Lateral flagella (VF0474) - Motility (VFC0237) - Motility (VFC0237)] [Lateral flagella (VF0474) - Motility (VFC0237)]  
VFG050161(gb|WP\_000579525) (*kpsC*) Capsule polysaccharide export protein [K1 capsule (VF0239) - Invasion (VFC0237) - Invasion (VFC0237)] [K1 capsule (VF0239) - Invasion (VFC0237)]  
VFG038639(gb|WP\_011705275) (*fliI*) flagellum-specific ATP synthase [Polar flagella (VF0473) - Motility (VFC0237) - Motility (VFC0237)] [Polar flagella (VF0473) - Motility (VFC0237)]



VFG001381(gb|YP\_177728) (icl) Isocitrate lyase Icl (isocitrase) (isocitratase) [Isocitrate lyase (VF0253) - Others

VFG038549(gb|WP\_016350148) (flpB) Flp pilus assembly protein [Flp type IV pili (VF0476) - Adherence (VFC

VFG012501(gb|WP\_000271272) (iroE) esterase [Salmochelin siderophore (VF0230) - Nutritional/Metabolic fact

VFG001228(gb|NP\_249102) (pilJ) twitching motility protein PilJ [Type IV pili (VF0082) - Adherence (VFC0001

VFG045310(gb|WP\_010946499) (LPG\_RS03780) glycosyltransferase family 4 protein [LPS (VF0171) - Immune

VFG000075(gb|NP\_463962) (inlA) Internalin A [InlA (VF0069) - Invasion (VFC0083)] [*Listeria monocytogene*

VFG038581(gb|WP\_043118279) (mshB) MSHA (mannose-sensitive hemagglutinin) pili minor prepilin protein M

VFG000141(gb|NP\_253675) (waaA) lipopolysaccharide core biosynthesis protein WaaP [LPS (VF0085) - Immu

VFG038521(gb|WP\_016350155) (flpI) Flp pilus assembly protein FlpI [Flp type IV pili (VF0476) - Adherence (

VFG048874(gb|WP\_041937789) (KP1\_RS17305) GDP-L-fucose synthase [Capsule (VF0560) - Immune modula

VFG047111(gb|WP\_003022291) (wbtH) asparagine synthase (glutamine-hydrolyzing) [LPS (VF0542) - Immune

VFG038353(gb|WP\_005320743) (ascS) type III secretion system inner membrane export apparatus protein AscS

VFG006339(gb|WP\_000716249) (babA/hopS) outer membrane protein adhesin [BabA (VF0053) - Adherence (V

VFG002348(gb|WP\_005160443) (flgE) flagellar hook protein FlgE [Flagella (VF0394) - Motility (VFC0204)] [Y

VFG000636(gb|AAW31739) (set1B) ShET1B [ShET1 (VF0125) - Exotoxin (VFC0235)] [*Shigella flexneri* 2a str

VFG000112(gb|NP\_253216) (pilB) type 4 fimbrial biogenesis protein PilB [Type IV pili (VF0082) - Adherence (

VFG038155(gb|WP\_000209960) (ACICU\_RS00500) phosphomannomutase/phosphoglucomutase [Capsule (VF0

VFG038545(gb|WP\_043118798) (flpC) Flp pilus secretin FlpC [Flp type IV pili (VF0476) - Adherence (VFC000

VFG050699(gb|WP\_000840548.1) (pilR) sigma-54 dependent transcriptional regulator [TFP (VF1334) - Adheren

VFG038865(gb|WP\_005314289) (fliG) flagellar motor switch protein G [Lateral flagella (VF0474) - Motility (V

VFG000053(gb|WP\_010930823) (bcr4) *Bordetella* Bsc type III secretion system protein Bcr4 [TTSS (VF0035) -

VFG000115(gb|NP\_249839) (toxA) exotoxin A precursor [ExoA (VF0086) - Exotoxin (VFC0235)] [*Pseudomon*

VFG001257(gb|NP\_250135) (fliN) flagellar motor switch protein FliN [Flagella (VF0273) - Motility (VFC0204)

VFG038421(gb|WP\_043118352) (fimE) fimbrial protein [Type I pili (VF0486) - Adherence (VFC0001)] [*Aerom*

VFG000360(gb|WP\_002212799) (ybtT) type II thioesterase YbtT [*Yersiniabactin* (VF0136) - Nutritional/Metabo

VFG001245(gb|NP\_249778) (flgL) flagellar hook-associated protein 3 FlgL [Flagella (VF0273) - Motility (VFC0

VFG002281(gb|WP\_003468301) (nagL) hyaluronidase [Mu-toxin (VF0389) - Exoenzyme (VFC0251)] [*Clostrid*

VFG038856(gb|WP\_005314315) (lfiN) lateral flagellar motor switch protein, lfiN [Lateral flagella (VF0474) - M

VFG002193(gb|WP\_002369249) (fsrB) agrBfs protein [Fsr (VF0360) - Biofilm (VFC0271)] [*Enterococcus faeca*

VFG038615(gb|WP\_016349152) (mshI) MSHA (mannose-sensitive hemagglutinin) pili biogenesis protein MshI,

VFG046118(gb|WP\_011205945) (mhp107) P97 paralog, surface adhesin [P97/P102 paralog family (VF0426) - A

VFG001983(gb|YP\_002344319) (pebA) bifunctional adhesin/ABC transporter aspartate/glutamate-binding protei

VFG000917(gb|WP\_000089583) (chuA) Outer membrane heme/hemoglobin receptor ChuA [Chu (VF0227) - Nu

VFG038691(gb|WP\_010634619) (flhG) CobQ/CobB/MinD/ParA family protein [Polar flagella (VF0473) - Motil

VFG012509(gb|WP\_001111200) (iroC) ATP binding cassette transporter [Salmochelin siderophore (VF0230) - N

VFG000359(gb|WP\_001088826) (ybtE) yersiniabactin siderophore biosynthetic protein [*Yersiniabactin* (VF0136

VFG000347(gb|WP\_010869038) (hgpC) hemoglobin-binding protein [Hgp (VF0270) - Nutritional/Metabolic fac

VFG038753(gb|WP\_024944879) (motY) sodium-type flagellar protein MotY [Polar flagella (VF0473) - Motility

VFG038788(gb|WP\_011706639) (flgG) flagellar basal body rod protein FlgG [Polar flagella (VF0473) - Motility

VFG000366(gb|WP\_002212761) (ybtQ) yersiniabactin ABC transporter ATP-binding/permease protein YbtQ [Y

VFG038607(gb|WP\_016349154) (mshJ) MSHA (mannose-sensitive hemagglutinin) pili biogenesis protein MshJ

VFG002450(gb|WP\_004533397) (bipB) Type III secretion system translocator protein BipB [Bsa T3SS (VF0428

VFG038867(gb|WP\_005314284) (lfiI) lateral flagellar FliI-like assembly ATPase [Lateral flagella (VF0474) - M

VFG000261(gb|WP\_002225480) (iga) IgA-specific serine endopeptidase [IgA1 protease (VF0080) - Effector del

VFG050414(gb|WP\_002027454.1) (pilF) type IV pilus biogenesis/stability protein PilW [TFP (VF1334) - Adher

VFG050428(gb|WP\_000128073.1) (fimV) hypothetical protein [TFP (VF1334) - Adherence (VFC0001)] [*Acinet*

VFG037316(gb|WP\_000744381) (entE) non-ribosomal peptide synthetase adenylate-forming enzyme of acinetob

VFG013063(gb|WP\_001017208) (shuS) heme/hemoglobin transport protein ShuS [Shu (VF0256) - Nutritional/M

VFG002069(gb|NP\_248773) (hsiB1/vipA/tssB) type VI secretion system tubule-forming protein VipA [HSI-I (V

VFG039686 (CBU\_2059\*) Coxiella Dot/Icm type IVB secretion system translocated effector [T4SS secreted effe

VFG048478(gb|WP\_004147521) (fepG) iron-enterobactin transporter permease [Ent (VF0562) - Nutritional/Meta

VFG000920(gb|WP\_000020034) (chuX) putative heme-binding protein ChuX [Chu (VF0227) - Nutritional/Meta

VFG006721(gb|NP\_466343) (inlJ) internalin J [InlJ (VF0445) - Adherence (VFC0001)] [Listeria monocytogenes

VFG000878(gb|WP\_000872015) (fimG) FimG protein precursor [Type 1 fimbriae (VF0221) - Adherence (VFC0

VFG038812(gb|WP\_011706645) (cheR-3) chemotaxis protein CheR [Polar flagella (VF0473) - Motility (VFC02

VFG000065(gb|WP\_010930832) (bscD) putative type III secretion protein [TTSS (VF0035) - Effector delivery s

VFG002531(gb|WP\_011205291) (cheA) chemotaxis two-component sensor kinase CheA [Flagella (VF0430) - M

VFG038289(gb|WP\_016349339) (exeH) general secretion pathway protein H [Exe T2SS (VF0478) - Effector del

VFG048554(gb|WP\_004902400) (iroD) siderophore esterase IroD [Sal (VF0563) - Nutritional/Metabolic factor (

VFG000133(gb|NP\_252241) (algA) phosphomannose isomerase / guanosine 5'-diphospho-D-mannose pyrophosph

VFG000895(gb|WP\_000654937) (papC) usher protein PapC [P fimbriae (VF0220) - Adherence (VFC0001)] [Es

VFG043627(gb|WP\_000756959) (mrkA) type 3 fimbrial major pilin subunit MrkA [Type 3 fimbriae (VF0567) -

VFG002376(gb|WP\_005167723) (rfbG) CDP-glucose 4,6-dehydratase [O-antigen (VF0392) - Immune modulat

VFG048907(gb|WP\_014907226) (KP1\_RS17315) glycosyltransferase [Capsule (VF0560) - Immune modulation

VFG038875(gb|WP\_005314261) (lfgF) lateral flagellar basal-body rod protein LfgF [Lateral flagella (VF0474) -

VFG038399(gb|WP\_011705723) (atsP) Type VI secretion system protein [T6SS (VF0480) - Effector delivery sy

VFG014111(gb|NP\_251837) (wbpJ) glycosyl transferase WbpJ [LPS (VF0085) - Immune modulation (VFC0258

VFG048277(gb|WP\_009308599) (fimD) outer membrane usher protein [Type I fimbriae (VF0566) - Adherence

VFG037414(gb|WP\_012391956) (bauD) ferric siderophore ABC transporter, permease protein BauD [Acinetoba

VFG041336(gb|WP\_010948154) (ankF/legA14/ceg31) Dot/Icm type IV secretion system effector AnkF/LegA14

VFG038877(gb|WP\_005314257) (lfgH) lateral flagellar L-ring protein, LfgH [Lateral flagella (VF0474) - Motilit

VFG000879(gb|WP\_000832235) (fimH) FimH protein precursor [Type 1 fimbriae (VF0221) - Adherence (VFC0

VFG045531(gb|WP\_010947388) (LPG\_RS08320) Dot/Icm type IV secretion system effector [Dot/Icm T4SS sec

VFG038659(gb|WP\_011705280) (fliN) flagellar motor switch protein FliN [Polar flagella (VF0473) - Motility (V

VFG001315(gb|WP\_000222233) (hysA) hyaluronate lyase precursor [Hyaluronate lyase (VF0013) - Exoenzyme

VFG048643(gb|WP\_014907727) (vipB/tssC) type VI secretion system contractile sheath large subunit VipB [T6

VFG002195(gb|WP\_002399773) (EF0818) polysaccharide lyase, family 8 [Hyaluronidase (VF0359) - Exoenzym

VFG002432(gb|WP\_004537540) (pilQ) type IV pilus biosynthesis protein [Type IV pili (VF0431) - Adherence (

VFG016472(gb|WP\_011206327) (p216) protein P216, cilium adhesin p97 paralog [P97/P102 paralog family (VF

VFG001443(gb|AAF37887) (ompA) outer membrane protein A [OmpA (VF0236) - Invasion (VFC0083)] [Esche

VFG002046(gb|WP\_000135089) (gspC) general secretion pathway protein C [T2SS (VF0333) - Effector delivery

VFG048687(gb|WP\_002902160) (hcp/tssD) type VI secretion system protein, Hcp family [T6SS (VF0569) - Eff

VFG049906 (tssK) Type VI secretion system protein TssK [T6SS (VF0579) - Effector delivery system (VFC008

VFG001935(gb|YP\_002344312) (ciaB) invasion antigen CiaB [CiaB (VF0324) - Invasion (VFC0083)] [Campylo

VFG010686(gb|WP\_010948184) (sdbB) Dot/Icm type IV secretion system effector SdbB [Dot/Icm T4SS secreter

VFG000861(gb|WP\_001045649) (pic) Pic serine protease precursor, autotransporter [Pic (VF0218) - Effector del

VFG045336(gb|AHK25021) (llsY) LlsY [LLS (VF0410) - Exotoxin (VFC0235)] [Listeria innocua SLCC6294]

VFG002171(gb|WP\_011109430) (EF0149) aggregation substance [AS (VF0352) - Adherence (VFC0001)] [Ente

VFG012609(gb|WP\_000993317) (chuW) Putative oxygen independent coproporphyrinogen III oxidase [Chu (VF

VFG014369(gb|NP\_249789) (fleS) two-component sensor [Flagella (VF0273) - Motility (VFC0204)] [Pseudomo

VFG037573 (csuA) Csu pilus subunit CsuA [Csu fimbriae (VF0461) - Biofilm (VFC0271)] [Acinetobacter baum

VFG038322(gb|WP\_180975055) (ascJ) type III secretion system OM ring protein AscJ [T3SS (VF0479) - Effect

VFG038667(gb|WP\_016350054) (fliP) flagellar biosynthesis protein FliP [Polar flagella (VF0473) - Motility (VFC0204)] [Enterobacteriaceae (VF000001)] [Enterobacteriaceae (VF000001)]

VFG001958(gb|YP\_002344813) (rfbC) dTDP-4-dehydrorhamnose 3,5-epimerase [Capsule (VF0323) - Immune modulation (VFC0258)] [Enterobacteriaceae (VF000001)]

VFG038452(gb|WP\_016351631) (tapO) type IV pilus biogenesis protein PilO [Tap type IV pili (VF0475) - Adherence (VFC0001)] [Enterobacteriaceae (VF000001)]

VFG051131(gb|WP\_006191504.1) (bmaC) autotransporter outer membrane beta-barrel domain-containing protein [Adherence (VFC0001)] [Enterobacteriaceae (VF000001)]

VFG000122(gb|NP\_252230) (algD) GDP-mannose 6-dehydrogenase AlgD [Alginate (VF0091) - Biofilm (VFC0204)] [Enterobacteriaceae (VF000001)]

VFG038715(gb|WP\_024943899) (motA) chemotaxis protein MotA [Polar flagella (VF0473) - Motility (VFC0204)] [Enterobacteriaceae (VF000001)]

VFG049905(gb|WP\_000343289) (tssL) Type VI secretion system protein TssL [T6SS (VF0579) - Effector delivery (VFC0204)] [Enterobacteriaceae (VF000001)]

VFG010759(gb|WP\_010948114) (vpdA/vipD2) Dot/Icm type IV secretion system effector VpdA [Dot/Icm T4SS (VF0579) - Effector delivery (VFC0204)] [Enterobacteriaceae (VF000001)]

VFG002172(gb|WP\_010710127) (EF0485) aggregation substance [AS (VF0352) - Adherence (VFC0001)] [Enterobacteriaceae (VF000001)]

VFG043015(gb|NP\_250150) (PA1459) chemotaxis-specific methyltransferase [Flagella (VF0273) - Motility (VFC0204)] [Enterobacteriaceae (VF000001)]

VFG039131(gb|NP\_820609) (icmE/dotG) Type IVB secretion system protein IcmE/DotG, inner membrane protein [Type IVB secretion system (VF0579) - Effector delivery (VFC0204)] [Enterobacteriaceae (VF000001)]

VFG012162(gb|WP\_011590241) (nanJ) exo-alpha-sialidase [Sialidase (VF0391) - Exoenzyme (VFC0251)] [Clostridiaceae (VF000001)]

VFG037560(gb|WP\_000790104) (csuA/B) Csu pilus major pilin subunit CsuA/B [Csu fimbriae (VF0461) - Biofilm (VFC0204)] [Enterobacteriaceae (VF000001)]

VFG005486(gb|WP\_000417180) (iga) G5 domain-containing protein [IgA1 protease (VF0147) - Immune modulation (VFC0258)] [Enterobacteriaceae (VF000001)]

VFG050157(gb|WP\_001331698) (kpsF) Polysialic acid capsule expression protein [K1 capsule (VF0239) - Invasion (VFC0204)] [Enterobacteriaceae (VF000001)]

VFG002088(gb|WP\_000225015) (icmF/vasK) type VI secretion system inner membrane protein VasK [VAS T6SS (VF0579) - Effector delivery (VFC0204)] [Enterobacteriaceae (VF000001)]

VFG044327(gb|WP\_000140406) (ybtA) yersiniabactin transcriptional regulator YbtA [Ybt (VF0564) - Nutritional/Metabolic factor (VFC0204)] [Yersiniaceae (VF000001)]

VFG034826(gb|WP\_000484292) (espR3) Type III secretion system effector espR3 [TTSS secreted effectors (VF0579) - Effector delivery (VFC0204)] [Yersiniaceae (VF000001)]

VFG038772(gb|WP\_016351319) (flgK) flagellar hook-associated protein FlgK [Polar flagella (VF0473) - Motility (VFC0204)] [Enterobacteriaceae (VF000001)]

VFG001937(gb|YP\_002344529) (Cj1136) glycosyltransferase [LOS (VF0326) - Immune modulation (VFC0258)] [Enterobacteriaceae (VF000001)]

VFG001254(gb|NP\_249795) (fliI) flagellum-specific ATP synthase FliI [Flagella (VF0273) - Motility (VFC0204)] [Enterobacteriaceae (VF000001)]

VFG000015(gb|WP\_010931651) (ptxC) pertussis toxin subunit 3 precursor [Ptx (VF0026) - Exotoxin (VFC0235)] [Enterobacteriaceae (VF000001)]

VFG001231(gb|NP\_249104) (chpA) still frameshift probable component of chemotactic signal transduction system [Chemotaxis (VF0273) - Motility (VFC0204)] [Enterobacteriaceae (VF000001)]

VFG000922(gb|WP\_000910402) (chuU) heme permease protein ChuU [Chu (VF0227) - Nutritional/Metabolic factor (VFC0204)] [Enterobacteriaceae (VF000001)]

VFG002049(gb|WP\_001173470) (gspF) general secretion pathway protein F [T2SS (VF0333) - Effector delivery (VFC0204)] [Enterobacteriaceae (VF000001)]

VFG007959(gb|NP\_217478) (Rv2962c) PGL/p-HBAD biosynthesis rhamnosyltransferase [PDIM (VF0309) - Immune modulation (VFC0258)] [Mycobacteriaceae (VF000001)]

VFG001966(gb|YP\_002344821) (Cj1438c) sugar transferase [Capsule (VF0323) - Immune modulation (VFC0258)] [Enterobacteriaceae (VF000001)]

VFG001142(gb|WP\_042960771) (hopZ) outer membrane protein adhesin [HopZ (VF0054) - Adherence (VFC0001)] [Enterobacteriaceae (VF000001)]

VFG038824(gb|WP\_011706648) (flgM) anti-sigma-D factor [Polar flagella (VF0473) - Motility (VFC0204)] [Acetivibrioaceae (VF000001)]

VFG044197(gb|WP\_003022882) (fslC) diaminopimelate decarboxylase [Rhizoferrin (VF0551) - Nutritional/Metabolic factor (VFC0204)] [Rhizobium (VF000001)]

VFG047777(gb|WP\_003022126) (pdpB) Type VI secretion system TssM homolog [T6SS (VF0544) - Effector delivery (VFC0204)] [Enterobacteriaceae (VF000001)]

VFG049164(gb|WP\_004175305) (clbS) colibactin self-protection protein ClbS [Colibactin (VF0573) - Exotoxin (VFC0235)] [Enterobacteriaceae (VF000001)]

VFG048468(gb|WP\_004176917) (fepD) iron-enterobactin transporter membrane protein [Ent (VF0562) - Nutritional/Metabolic factor (VFC0204)] [Enterobacteriaceae (VF000001)]

VFG035929(gb|WP\_014639418) (aatD) AatD [Dispersin (VF0215) - Others (VFC0346)] [Escherichia coli O44:H12 (VF000001)]

VFG041091(gb|NP\_459264) (STM0267) sciB domain protein [SCI (Salmonella centrisome island) (VF0974) - Enterobacteriaceae (VF000001)]

VFG038405(gb|WP\_011705727) (AHA\_RS09305) type VI secretion system PAAR protein [T6SS (VF0480) - Effector delivery (VFC0204)] [Yersiniaceae (VF000001)]

VFG001916(gb|YP\_002344282) (flhA) flagellar biosynthesis protein FlhA [Flagella (VF0114) - Motility (VFC0204)] [Enterobacteriaceae (VF000001)]

VFG000903(gb|WP\_001045652) (pic) Pic serine protease precursor, autotransporter [Pic (VF0232) - Effector delivery (VFC0204)] [Enterobacteriaceae (VF000001)]

VFG049154(gb|WP\_014907257) (clbH) colibactin non-ribosomal peptide synthetase ClbH [Colibactin (VF0573) - Exotoxin (VFC0235)] [Enterobacteriaceae (VF000001)]

VFG001015(gb|NP\_858289) (spa40) type III secretion system export apparatus switch protein Spa40 [TTSS (VF0579) - Effector delivery (VFC0204)] [Yersiniaceae (VF000001)]

VFG038675(gb|WP\_011705283) (fliR) flagellar biosynthesis protein FliR [Polar flagella (VF0473) - Motility (VFC0204)] [Enterobacteriaceae (VF000001)]

VFG001967(gb|YP\_002344822) (glf) UDP-galactopyranose mutase [Capsule (VF0323) - Immune modulation (VFC0258)] [Enterobacteriaceae (VF000001)]

VFG037274(gb|WP\_001281538) (barA) siderophore efflux system of the ABC superfamily [Acinetobactin (VF0573) - Exotoxin (VFC0235)] [Acetivibrioaceae (VF000001)]

VFG049917(gb|WP\_000508696) (rhs/PAAR) Type VI secretion system protein, PAAR family [T6SS (VF0579) - Effector delivery (VFC0204)] [Yersiniaceae (VF000001)]

VFG044328(gb|WP\_015874963) (irp2) yersiniabactin non-ribosomal peptide synthetase HMWP2 [Ybt (VF0564) - Nutritional/Metabolic factor (VFC0204)] [Yersiniaceae (VF000001)]

VFG000358(gb|WP\_002212885) (fyuA/psn) pesticin/yersiniabactin receptor protein [Yersiniabactin (VF0136) - Exotoxin (VFC0235)] [Yersiniaceae (VF000001)]

VFG000630(gb|NP\_708742) (sigA) serine protease, autotransporter SigA [SigA (VF0119) - Exoenzyme (VFC020001)] [

VFG050484(gb|WP\_001152285.1) (gspO/pilD) A24 family peptidase [TFP (VF1334) - Adherence (VFC0001)] [

VFG038397(gb|WP\_011705722) (vasH) sigma-54 dependent transcriptional regulator [T6SS (VF0480) - Effector delivery system (VFC00086)] [

VFG000139(gb|NP\_253697) (waaG) B-band O-antigen polymerase [LPS (VF0085) - Immune modulation (VFC000001)] [

VFG001408(gb|NP\_217456) (mas) multifunctional mycocerosic acid synthase [PDIM (VF0309) - Immune modulation (VFC000001)] [

VFG002083(gb|WP\_000083409) (vasF) type VI secretion system protein VasF [VAS T6SS (VF0335) - Effector delivery system (VFC00086)] [

VFG038345(gb|WP\_005320764) (acr2) chaperone protein [T3SS (VF0479) - Effector delivery system (VFC00086)] [

VFG038655(gb|WP\_011705279) (fliM) flagellar motor switch protein FliM [Polar flagella (VF0473) - Motility (VFC0204)] [

VFG002414(gb|WP\_000730972) (yagZ/ecpA) E. coli common pilus structural subunit EcpA [ECP (VF0404) - Adherence (VFC000001)] [

VFG037028(gb|WP\_002218620) (katA) catalase [KatA (VF0454) - Stress survival (VFC0282)] [Neisseria meningitidis (VFC000001)] [

VFG000163(gb|NP\_251088) (fpvA) ferripyoverdine receptor FpvA [Pyoverdine (VF0094) - Nutritional/Metabolic factor (VFC000001)] [

VFG041323(gb|WP\_010947957) (lem21) Dot/Icm type IV secretion system effector Lem21 [Dot/Icm T4SS secreted effectors (VF079)] [

VFG002065(gb|NP\_248769) (hsiJ1) type VI secretion system hcp secretion island protein HsiJ1 [HSI-I (VF0334) - Effector delivery system (VFC00086)] [

VFG001988(gb|YP\_002344798) (cysC) adenylyl-sulfate kinase [Capsule (VF0323) - Immune modulation (VFC000001)] [

VFG002184(gb|WP\_002359685) (cpsG) MurB family protein [Capsule (VF0361) - Immune modulation (VFC000001)] [

VFG000064(gb|WP\_010930831) (bcrD) Type III secretion system LcrD homolog protein BcrD [TTSS (VF0035) - Effector delivery system (VFC00086)] [

VFG007382(gb|WP\_000907265) (flgM) negative regulator of flagellin synthesis FlgM, putative [Flagella (VF0566) - Adherence (VFC000001)] [

VFG005197(gb|WP\_000006706) (pavA) Fibronectin-binding protein-like protein A [PavA (VF0283) - Adherence (VFC000001)] [

VFG000916(gb|WP\_001017192) (chuS) heme oxygenase ChuS [Chu (VF0227) - Nutritional/Metabolic factor (VFC000001)] [

VFG050912(gb|WP\_000898330.1) (vgrG/tssI) type VI secretion system tip protein VgrG [T6SS (VF1337) - Effector delivery system (VFC00086)] [

VFG049120(gb|WP\_012737535) (allB) allantoinase [Allantoin utilization (VF0572) - Nutritional/Metabolic factor (VFC000001)] [

VFG049155(gb|WP\_000829570) (clbI) colibactin polyketide synthase ClbI [Colibactin (VF0573) - Exotoxin (VFC000001)] [

VFG048229(gb|WP\_015875142) (fimB) tyrosine recombinase [Type I fimbriae (VF0566) - Adherence (VFC000001)] [

VFG037118(gb|WP\_002247552) (recN) DNA repair protein RecN [RecN (VF0457) - Stress survival (VFC0282)] [

VFG046214(gb|NP\_819037) (CBUA0020) Coxiella Dot/Icm type IVB secretion system translocated effector [T4SS secreted effectors (VF079)] [

VFG038719(gb|WP\_016350061) (pomB) ompA family protein [Polar flagella (VF0473) - Motility (VFC0204)] [

VFG000161(gb|NP\_251089) (pvdD) pyoverdine synthetase D [Pyoverdine (VF0094) - Nutritional/Metabolic factor (VFC000001)] [

VFG038627(gb|WP\_016350050) (fliF) flagellar MS-ring protein [Polar flagella (VF0473) - Motility (VFC0204)] [

VFG045481(gb|WP\_010945891) (LPG\_RS00665) hypothetical protein [Dot/Icm T4SS secreted effectors (VF079)] [

VFG038723(gb|WP\_011705294) (AHML\_RS07540) CobQ/CobB/MinD/ParA family protein [Polar flagella (VF0473) - Motility (VFC0204)] [

VFG033511(gb|WP\_000803678) (sepQ/escQ) Type III secretion system C ring protein EscQ [TTSS (VF0172) - Effector delivery system (VFC00086)] [

VFG051042(gb|WP\_000653195.1) (hcp/tssD) type VI secretion system tube protein Hcp [T6SS (VF1337) - Effector delivery system (VFC00086)] [

VFG002179(gb|AAD09858) (esp) Enterococcal surface protein; Esp [Esp (VF0353) - Adherence (VFC0001)] [Enterococcus faecalis (VFC000001)] [

VFG038913 (rtxA) multifunctional autoprocessing repeats-in-toxins (MARTX) toxin [RtxA (VF0482) - Exotoxin (VFC000001)] [

VFG000180(gb|NP\_251791) (xcpT) general secretion pathway protein G [Xcp secretion system (VF0084) - Effector delivery system (VFC00086)] [

VFG042739(gb|NP\_254019) (crc) catabolite repression control protein [Type IV pili (VF0082) - Adherence (VFC000001)] [

VFG049040(gb|WP\_074160401) (KP1\_RS17225) glycosyltransferase family 4 protein [LPS (VF0561) - Immune modulation (VFC000001)] [

VFG048488(gb|WP\_002893737) (fepC) iron-enterobactin transporter ATP-binding protein [Ent (VF0562) - Nutritional/Metabolic factor (VFC000001)] [

VFG038848(gb|WP\_016350360) (flmD) FlmD protein [Polar flagella (VF0473) - Motility (VFC0204)] [Aeromonas hydrophila (VFC000001)] [

VFG038576(gb|WP\_016349164) (mshC) MSHA (mannose-sensitive hemagglutinin) pili minor prepilin protein MshC [MSHA (VF0562) - Nutritional/Metabolic factor (VFC000001)] [

VFG038568(gb|WP\_016349166) (mshO) MSHA (mannose-sensitive hemagglutinin) pili biogenesis protein MshO [MSHA (VF0562) - Nutritional/Metabolic factor (VFC000001)] [

VFG044326(gb|WP\_001327262) (ybtP) yersiniabactin ABC transporter ATP-binding/permease protein YbtP [YbtP (VF0475) - Adherence (VFC000001)] [

VFG038501(gb|WP\_043119142) (tapV) type IV pilus assembly protein TapV [Tap type IV pili (VF0475) - Adherence (VFC000001)] [

VFG002286(gb|WP\_003470007) (cpe) enterotoxin Cpe [CPE (VF0383) - Exotoxin (VFC0235)] [Clostridium perfringens (VFC000001)] [

VFG013948(gb|NP\_251650) (pilZ) type 4 fimbrial biogenesis protein PilZ [Type IV pili (VF0082) - Adherence (VFC000001)] [

VFG049910(gb|WP\_000348788) (tssG) Type VI secretion system protein TssG [T6SS (VF0579) - Effector delivery system (VFC00086)] [

VFG051123(gb|WP\_032449063.1) (bmaA) autotransporter outer membrane beta-barrel domain-containing protein [Type I fimbriae (VF0566) - Adherence (VFC0001)] [Yersinia enterocolitica 4O80 (VF0566)]

VFG000615(gb|NP\_709454) (iucA) aerobactin synthesis protein IucA [Aerobactin (VF0123) - Nutritional/Metabolic factor (VFC0235)] [Clostridium difficile 6300 (VF0123)]

VFG050118(gb|WP\_000291846) (cesH) hydrolase, alpha/beta superfamily, CesH [Cereulide (VF0583) - Exotoxin (VFC0235)] [Clostridium botulinum 1024 (VF0583)]

VFG000477(gb|NP\_461845) (rpoS) RNA polymerase sigma factor RpoS [RpoS (VF0112) - Regulation (VFC0300)] [Escherichia coli O157:H7 (VF0112)]

VFG048267(gb|WP\_015875145) (fimC) periplasmic chaperone [Type I fimbriae (VF0566) - Adherence (VFC0001)] [Yersinia enterocolitica 4O80 (VF0566)]

VFG000365(gb|WP\_002214412) (ybtP) yersiniabactin ABC transporter ATP-binding/permease protein YbtP [Yersiniabactin (VF0136) - Nutritional/Metabolic factor (VFC0235)] [Yersinia enterocolitica 4O80 (VF0136)]

VFG001932(gb|YP\_002343539) (cdtC) cytolethal distending toxin C [CDT (VF0115) - Exotoxin (VFC0235)] [Clostridium difficile 6300 (VF0115)]

VFG000876(gb|WP\_000120946) (fimD) Outer membrane usher protein fimD precursor [Type 1 fimbriae (VF0220) - Adherence (VFC0001)] [Escherichia coli O157:H7 (VF0220)]

VFG045510(gb|WP\_010946845) (ravN) Dot/Icm type IV secretion system effector RavN [Dot/Icm T4SS secretion system (VF0191) - Effector delivery system (VFC0235)] [Yersinia enterocolitica 4O80 (VF0191)]

VFG000804(gb|WP\_000098793) (cesT) multieffector chaperone [TTSS (VF0191) - Effector delivery system (VFC0235)] [Yersinia enterocolitica 4O80 (VF0191)]

VFG012597(gb|WP\_000089593) (chuA) Outer membrane heme/hemoglobin receptor ChuA [Chu (VF0234) - Nutritional/Metabolic factor (VFC0235)] [Clostridium difficile 6300 (VF0234)]

VFG012591(gb|WP\_001017167) (chuS) heme oxygenase ChuS [Chu (VF0234) - Nutritional/Metabolic factor (VFC0235)] [Clostridium difficile 6300 (VF0234)]

VFG002366(gb|WP\_005167739) (YE\_RS15435) glycosyltransferase family 4 protein [O-antigen (VF0392) - Immune modulation (VFC0258)] [Yersinia enterocolitica 4O80 (VF0392)]

VFG034636(gb|WP\_000358674) (cfaC) colonisation factor antigen c, usher [Adhesive fimbriae (VF0213) - Adherence (VFC0001)] [Yersinia enterocolitica 4O80 (VF0213)]

VFG041020(gb|NP\_250353) (PA1662) ClpA/B-type protease [HSI-2 (VF0943) - Effector delivery system (VFC0235)] [Clostridium difficile 6300 (VF0943)]

VFG001266(gb|NP\_252912) (pchI) ABC transporter ATP-binding protein [Pyochelin (VF0095) - Nutritional/Metabolic factor (VFC0235)] [Pseudomonas aeruginosa PAO1 (VF0095)]

VFG045325(gb|WP\_010946516) (LPG\_RS03855) glycosyltransferase family 2 protein [LPS (VF0171) - Immune modulation (VFC0258)] [Yersinia enterocolitica 4O80 (VF0171)]

VFG000111(gb|NP\_253215) (pilA) type 4 fimbrial precursor PilA [Type IV pili (VF0082) - Adherence (VFC0001)] [Yersinia enterocolitica 4O80 (VF0082)]

VFG038611(gb|WP\_016349153) (mshI1) MSHA (mannose-sensitive hemagglutinin) pili biogenesis protein MshI1 [Yersiniabactin (VF0136) - Nutritional/Metabolic factor (VFC0235)] [Yersinia enterocolitica 4O80 (VF0136)]

VFG000361(gb|WP\_000982866) (ybtU) yersiniabactin biosynthetic protein YbtU [Yersiniabactin (VF0136) - Nutritional/Metabolic factor (VFC0235)] [Yersinia enterocolitica 4O80 (VF0136)]

VFG014473(gb|NP\_250132) (fliK) flagellar hook-length control protein FliK [Flagella (VF0273) - Motility (VFC0200)] [Yersinia enterocolitica 4O80 (VF0273)]

VFG001234(gb|NP\_249107) (chpD) probable transcriptional regulator [Type IV pili (VF0082) - Adherence (VFC0001)] [Yersinia enterocolitica 4O80 (VF0082)]

VFG049914(gb|WP\_000037389) (tssB) Type VI secretion system protein TssB [T6SS (VF0579) - Effector delivery system (VFC0235)] [Yersinia enterocolitica 4O80 (VF0579)]

VFG038313(gb|WP\_043118380) (exeN) general secretion pathway protein N [Exe T2SS (VF0478) - Effector delivery system (VFC0235)] [Yersinia enterocolitica 4O80 (VF0478)]

VFG045413(gb|WP\_133121395) (APH\_RS06575\*) hypothetical protein [P44/Msp2 family (VF0520) - Immune modulation (VFC0258)] [Yersinia enterocolitica 4O80 (VF0520)]

VFG041337(gb|WP\_010948158) (ankD/legA15) Dot/Icm type IV secretion system effector AnkD/LegA15 [Dot/Icm T4SS secretion system (VF0191) - Effector delivery system (VFC0235)] [Yersinia enterocolitica 4O80 (VF0191)]

VFG002306(gb|NP\_461449) (ratB) putative outer membrane protein [RatB (VF0399) - Adherence (VFC0001)] [Yersinia enterocolitica 4O80 (VF0399)]

VFG002288(gb|WP\_009902069) (toxB) toxin B [TcdB (VF0377) - Exotoxin (VFC0235)] [Clostridium difficile 6300 (VF0377)]

VFG015000(gb|NP\_252339) (mucP) metalloprotease protease [Alginate (VF0091) - Biofilm (VFC0271)] [Pseudomonas aeruginosa PAO1 (VF0091)]

VFG014099(gb|NP\_251849) (wbpA) UDP-N-acetyl-d-glucosamine 6-dehydrogenase [LPS (VF0085) - Immune modulation (VFC0258)] [Yersinia enterocolitica 4O80 (VF0085)]

VFG049909(gb|WP\_001113715) (fha) Type VI secretion system protein Fha [T6SS (VF0579) - Effector delivery system (VFC0235)] [Yersinia enterocolitica 4O80 (VF0579)]

VFG044331(gb|WP\_015874966) (ybtT) type II thioesterase YbtT [Ybt (VF0564) - Nutritional/Metabolic factor (VFC0235)] [Yersinia enterocolitica 4O80 (VF0564)]

VFG048518(gb|WP\_012737617) (fepA) outer membrane receptor FepA [Ent (VF0562) - Nutritional/Metabolic factor (VFC0235)] [Yersinia enterocolitica 4O80 (VF0562)]

VFG002522(gb|WP\_004198639) (flhA) flagellar biosynthesis protein FlhA [Flagella (VF0430) - Motility (VFC0200)] [Yersinia enterocolitica 4O80 (VF0430)]

VFG045319(gb|WP\_010946509) (LPG\_RS03825) ABC transporter permease [LPS (VF0171) - Immune modulation (VFC0258)] [Yersinia enterocolitica 4O80 (VF0171)]

VFG034679(gb|WP\_000074207) (ibeB) Cu(+)/Ag(+) efflux RND transporter outer membrane channel CusC [IbeB (VF0564) - Nutritional/Metabolic factor (VFC0235)] [Yersinia enterocolitica 4O80 (VF0564)]

VFG050163(gb|WP\_000197083) (neuE) polysialic acid biosynthesis protein [K1 capsule (VF0239) - Invasion (VFC0235)] [Yersinia enterocolitica 4O80 (VF0239)]

VFG000143(gb|NP\_253699) (waaF) heptosyltransferase I [LPS (VF0085) - Immune modulation (VFC0258)] [Yersinia enterocolitica 4O80 (VF0085)]

VFG001242(gb|NP\_249775) (flgI) flagellar P-ring protein precursor FlgI [Flagella (VF0273) - Motility (VFC0200)] [Yersinia enterocolitica 4O80 (VF0273)]

VFG012513(gb|WP\_001221122) (iroB) glucosyltransferase IroB [Salmocheilin siderophore (VF0230) - Nutritional/Metabolic factor (VFC0235)] [Yersinia enterocolitica 4O80 (VF0230)]

VFG000884(gb|WP\_000654937) (papC) usher protein PapC [P fimbriae (VF0220) - Adherence (VFC0001)] [Escherichia coli O157:H7 (VF0220)]

VFG016041(gb|NP\_251092) (pvdI) peptide synthase [Pyoverdine (VF0094) - Nutritional/Metabolic factor (VFC0235)] [Pseudomonas aeruginosa PAO1 (VF0094)]

VFG041096(gb|NP\_459269) (STM0272) ClpV1 family T6SS ATPase [SCI (Salmonella centrisome island) (VF0191) - Effector delivery system (VFC0235)] [Yersinia enterocolitica 4O80 (VF0191)]

VFG049084(gb|WP\_004175264) (rfbB) O-antigen export ABC transporter ATP-binding protein RfbB [LPS (VF0171) - Immune modulation (VFC0258)] [Yersinia enterocolitica 4O80 (VF0171)]

VFG038361(gb|WP\_005320818) (ati1) Ati2 chaperone [T3SS (VF0479) - Effector delivery system (VFC0086)] [Yersinia enterocolitica 4O80 (VF0479)]

VFG051098(gb|WP\_002001416.1) (clpV/tssH) type VI secretion system ATPase TssH [T6SS (VF1337) - Effector delivery system (VFC0235)] [Yersinia enterocolitica 4O80 (VF1337)]

VFG041039(gb|NP\_251057) (PA2367) hypothetical protein [HSI-3 (VF0944) - Effector delivery system (VFC000000)]

VFG006217 (opa) outer membrane beta-barrel protein [Opa (VF0076) - Invasion (VFC0083)] [Neisseria meningitidis MC58]

VFG041038(gb|NP\_251056) (PA2366) uricase [HSI-3 (VF0944) - Effector delivery system (VFC0086)] [Pseudomonas aeruginosa PAO1]

VFG043623(gb|WP\_002916122) (mrkF) type 3 fimbrial minor pilin subunit MrkF [Type 3 fimbriae (VF0567) - Adherence (VFC0001)] [Neisseria meningitidis MC58]

VFG039464(gb|NP\_820359) (CBU\_1370) Coxiella Dot/Icm type IVB secretion system translocated effector [T4SS secretion system (VF0302) - Nutritional/Metabolic factor (VFC0001)] [Coxiella burnetii Q117]

VFG000927(gb|WP\_000096764) (fepE) LPS O-antigen length regulator [Enterobactin (VF0228) - Nutritional/Metabolic factor (VFC0001)] [Enterobacteriaceae]

VFG002437(gb|WP\_011325557) (boaB) autotransporter protein [BoaB (VF0435) - Adherence (VFC0001)] [Bordetella pertussis ATCC 49619]

VFG038144(gb|WP\_001062908) (galE) UDP-glucose 4-epimerase GalE [Capsule (VF0465) - Immune modulation (VFC0001)] [Neisseria meningitidis MC58]

VFG001814(gb|NP\_215678) (narH) nitrate reductase subunit beta [Nitrate reductase (VF0302) - Nutritional/Metabolic factor (VFC0001)] [Neisseria meningitidis MC58]

VFG005775(gb|WP\_000403526) (cylA) ABC (ATP-binding cassette) transporter CylA [-haemolysin/cytolysin (VF0428) - Adherence (VFC0001)] [Neisseria meningitidis MC58]

VFG000831(gb|WP\_000628731) (escE) chaperone for EscF [TTSS (VF0191) - Effector delivery system (VFC0001)] [Yersinia enterocolitica 4O8]

VFG012343(gb|WP\_001234182) (sfaH) S fimbriae adhesin SfaH [S fimbriae (VF0222) - Adherence (VFC0001)] [Neisseria meningitidis MC58]

VFG046519(gb|WP\_003020038) (dipA) bacterial surface protein, sell repeat family protein [DipA (VF0545) - O-antigen (VF0545) - Adherence (VFC0001)] [Neisseria meningitidis MC58]

VFG000229 (pilS) pilin [Type IV pili (VF0075) - Adherence (VFC0001)] [Neisseria meningitidis MC58]

VFG002449(gb|WP\_004203135) (bipC) Type III secretion system translocator protein BipC [Bsa T3SS (VF0428) - Adherence (VFC0001)] [Bordetella pertussis ATCC 49619]

VFG000938(gb|WP\_001015709) (iucC) aerobactin siderophore biosynthesis protein IucC [Aerobactin (VF0229) - Nutritional/Metabolic factor (VFC0001)] [Aerobactin (VF0229)]

VFG038407(gb|WP\_011705728) (vgrG3) VgrG protein [T6SS (VF0480) - Effector delivery system (VFC0086)] [Vibrio cholerae O1 Inaba N169]

VFG000009(gb|WP\_050849356) (fimD) fimbrial adhesin [Fimbriae (VF0031) - Adherence (VFC0001)] [Bordetella pertussis ATCC 49619]

VFG039425(gb|NP\_820063) (cem4) Coxiella Dot/Icm type IVB secretion system translocated effector [T4SS secretion system (VF0302) - Nutritional/Metabolic factor (VFC0001)] [Coxiella burnetii Q117]

VFG048338(gb|WP\_002916079) (mrkI) LuxR family regulatory protein [Type 3 fimbriae (VF0567) - Biofilm (VFC0001)] [Neisseria meningitidis MC58]

VFG038643(gb|WP\_011705276) (fliJ) flagellar export protein FliJ [Polar flagella (VF0473) - Motility (VFC0204)] [Vibrio cholerae O1 Inaba N169]

VFG034915(gb|WP\_000225947) (espY4) Type III secretion system effector EspY4 [TTSS secreted effectors (VF0191) - Effector delivery system (VFC0001)] [Yersinia enterocolitica 4O8]

VFG038285(gb|WP\_005308483) (exeG) general secretion pathway protein G [Exe T2SS (VF0478) - Effector delivery system (VFC0001)] [Yersinia enterocolitica 4O8]

VFG048787(gb|WP\_004176417) (sciN/tssJ) type VI secretion system lipoprotein TssJ [T6SS (VF0569) - Effector delivery system (VFC0086)] [Vibrio cholerae O1 Inaba N169]

VFG016038(gb|NP\_251090) (pvdJ) pyoverdine biosynthesis protein PvdJ [Pyoverdine (VF0094) - Nutritional/Metabolic factor (VFC0001)] [Pseudomonas aeruginosa PAO1]

VFG048606(gb|WP\_004213922) (iucC) aerobactin siderophore biosynthesis protein IucC [Aerobactin (VF0565) - Nutritional/Metabolic factor (VFC0001)] [Aerobactin (VF0565)]

VFG044330(gb|WP\_032447695) (ybtU) yersiniabactin biosynthesis oxidoreductase YbtU [Ybt (VF0564) - Nutritional/Metabolic factor (VFC0001)] [Yersinia enterocolitica 4O8]

VFG049151(gb|WP\_001297917) (clbE) colibactin biosynthesis aminomalonyl-acyl carrier protein ClbE [Colibactin (VF0573) - Exotoxin (VFC0230)] [Escherichia coli O157:H7]

VFG048830(gb|WP\_014907233) (gndA) NADP-dependent phosphogluconate dehydrogenase [Capsule (VF0560) - Immune modulation (VFC0001)] [Neisseria meningitidis MC58]

VFG000862(gb|WP\_014639426) (pet) Pet serine protease precursor, autotransporter [Pet (VF0217) - Effector delivery system (VFC0001)] [Yersinia enterocolitica 4O8]

VFG038703(gb|WP\_011705289) (cheZ) chemotaxis protein CheZ [Polar flagella (VF0473) - Motility (VFC0204)] [Vibrio cholerae O1 Inaba N169]

VFG048508(gb|WP\_012737618) (fes) enterobactin/ferric enterobactin esterase [Ent (VF0562) - Nutritional/Metabolic factor (VFC0001)] [Enterobacteriaceae]

VFG043626(gb|WP\_000820818) (mrkB) fimbrial chaperone protein mrkB precursor [Type 3 fimbriae (VF0567) - Adherence (VFC0001)] [Neisseria meningitidis MC58]

VFG000127(gb|NP\_252235) (algG) outer membrane protein AlgE [Alginate (VF0091) - Biofilm (VFC0271)] [Pseudomonas aeruginosa PAO1]

VFG000227(gb|WP\_002221783) (pilS) pilin [Type IV pili (VF0075) - Adherence (VFC0001)] [Neisseria meningitidis MC58]

VFG044322(gb|WP\_004190148) (iroE) siderophore esterase IroE [Sal (VF0563) - Nutritional/Metabolic factor (VFC0001)] [Neisseria meningitidis MC58]

VFG034873(gb|WP\_001270084) (espX5) Type III secretion system effector EspX5 [TTSS secreted effectors (VF0191) - Effector delivery system (VFC0001)] [Yersinia enterocolitica 4O8]

VFG045307(gb|WP\_025862603) (pgi) glucose-6-phosphate isomerase [LPS (VF0171) - Immune modulation (VFC0001)] [Neisseria meningitidis MC58]

VFG049162(gb|WP\_002430641) (clbP) precolibactin peptidase ClbP [Colibactin (VF0573) - Exotoxin (VFC0230)] [Escherichia coli O157:H7]

VFG000415(gb|WP\_002213290) (yopO/ypkA) type III secretion system effector YopO, regulating actin polymerization [Yersinia enterocolitica 4O8]

VFG002382(gb|NP\_218387) (eccCa1) ESX-1 type VII secretion system FtsK/SpoIIIE family protein EccCa1 [ESX-1 (VF0344) - Effector delivery system (VFC0086)] [Chlamydia trachomatis L2]

VFG002152(gb|NP\_220384) (scc3) chaperone [TTSS (VF0344) - Effector delivery system (VFC0086)] [Chlamydia trachomatis L2]

VFG002342(gb|WP\_011816603) (flgK) flagellar hook-associated protein 1 FlgK [Flagella (VF0394) - Motility (VFC0204)] [Vibrio cholerae O1 Inaba N169]

VFG000278(gb|WP\_000946389) (flgE\_1) flagellar hook protein [Flagella (VF0051) - Motility (VFC0204)] [Helicobacter pylori NCTC 11637]

VFG045789(gb|WP\_001264082) (cgsF) curli production assembly/transport protein CsgF [Curli fibers (VF1138) - Adherence (VFC0001)] [Escherichia coli O157:H7]

VFG042978(gb|WP\_011109477) (ebpC) endocarditis and biofilm-associated pilus major subunit EbpC [Ebp pili (VF0075) - Adherence (VFC0001)] [Neisseria meningitidis MC58]

VFG038564(gb|WP\_016349167) (mshP) hypothetical protein [MSHA type IV pili (VF0477) - Adherence (VFC0204)]

VFG038760(gb|WP\_016351312) (flrB) two-component sensor kinase [Polar flagella (VF0473) - Motility (VFC0204)]

VFG001251(gb|NP\_249792) (fliF) flagellar M-ring protein FliF [Flagella (VF0273) - Motility (VFC0204)] [Pseudomonas aeruginosa]

VFG013292(gb|WP\_105163174) (lic3A) alpha-2,3-sialyltransferase [LOS (VF0044) - Immune modulation (VFC0204)]

VFG050267(gb|NP\_220230) (CT\_711) hypothetical protein [TTSS secreted effectors (VF0711) - Effector delivery system (VFC0204)]

VFG038561(gb|WP\_016349168) (mshQ) MSHA (mannose-sensitive hemagglutinin) pili biogenesis protein MshQ [MSHA type IV pili (VF0477) - Adherence (VFC0204)]

VFG001218(gb|NP\_253727) (pilQ) type 4 fimbrial biogenesis protein PilQ [Type IV pili (VF0082) - Adherence (VFC0204)]

VFG037735(gb|WP\_000633124) (adeH) outer membrane protein [AdeFGH efflux pump (VF0504) - Biofilm (VFC0204)]

VFG002406(gb|WP\_000728972) (esaA) type VII secretion system protein EsaA [Type VII secretion system (VF0082) - Adherence (VFC0204)]

VFG000027(gb|WP\_010931506) (brkA) serum resistance protein [Brk (VF0034) - Immune modulation (VFC0204)]

VFG034772(gb|WP\_000627910) (espL4) Type III secretion system effector EspL4 [TTSS secreted effectors (VF0711) - Effector delivery system (VFC0204)]

VFG035902(gb|WP\_000209220) (aatP) permease AatP [Dispersin (VF0215) - Others (VFC0346)] [Escherichia coli]

VFG000940(gb|WP\_001299620) (iucA) aerobactin siderophore biosynthesis protein IucD [Aerobactin (VF0229) - Nutritional/Metabolic factor (VFC0272)]

VFG002196(gb|WP\_011109578) (EF3023) polysaccharide lyase, family 8 [Hyaluronidase (VF0359) - Exoenzyme (VFC0251)]

VFG049148(gb|WP\_041168941) (clbB) colibactin hybrid non-ribosomal peptide synthetase/type I polyketide synthase [Colibactin (VF0467) - Nutritional/Metabolic factor (VFC0272)]

VFG037442(gb|WP\_000910253) (basA) acinetobactin biosynthesis protein [Acinetobactin (VF0467) - Nutritional/Metabolic factor (VFC0272)]

VFG048951(gb|WP\_015875028) (KP1\_RS17330) polysaccharide biosynthesis tyrosine autokinase [Capsule (VF0239) - Invasiveness (VFC0204)]

VFG046119(gb|WP\_011206220) (mhp385) P97 paralog, surface adhesin [P97/P102 paralog family (VF0426) - Adherence (VFC0204)]

VFG048609(gb|WP\_004213923) (iucD) lysine 6-monooxygenase IucD [Aerobactin (VF0565) - Nutritional/Metabolic factor (VFC0272)]

VFG050165(gb|WP\_001259305) (neuA) N-acylneuraminate cytidyltransferase [K1 capsule (VF0239) - Invasiveness (VFC0204)]

VFG045474(gb|AAM75251) (cylM) CylM; cytolysin subunit modifier [Cytolysin (VF0356) - Exotoxin (VFC0239)]

VFG042218(gb|AAN07916) (cif) Type III secretion system effector Cif, cyclomodulin [TTSS secreted effectors (VF0711) - Effector delivery system (VFC0204)]

VFG000902(gb|WP\_001034089) (sat) Acreted auto transpoter toxin [Sat (VF0231) - Effector delivery system (VFC0204)]

VFG034815(gb|WP\_000671689) (espR1) Type III secretion system effector espR1 [TTSS secreted effectors (VF0711) - Effector delivery system (VFC0204)]

VFG038695(gb|WP\_017409955) (fliA) flagellar biosynthesis sigma factor [Polar flagella (VF0473) - Motility (VFC0204)]

VFG015509(gb|NP\_252901) (phzC1) phenazine biosynthesis protein PhzC [Pyocyanin (VF0100) - Nutritional/Metabolic factor (VFC0272)]

VFG022130(gb|NP\_214804) (eccD3) Type IIV secretion system transmembrane protein EccD3 [ESX-3 (VF0521) - Effector delivery system (VFC0204)]

VFG000921(gb|WP\_000189356) (chuY) ChuY [Chu (VF0227) - Nutritional/Metabolic factor (VFC0272)] [Escherichia coli]

VFG001307(gb|WP\_001238807) (cap8K) type 8 capsular polysaccharide synthesis protein Cap8K [Capsule (VF0239) - Invasiveness (VFC0204)]

VFG038281(gb|WP\_016349337) (exeF) general secretion pathway protein F [Exe T2SS (VF0478) - Effector delivery system (VFC0204)]

VFG038878(gb|WP\_005314254) (flgI) flagellar basal body P-ring protein [Lateral flagella (VF0474) - Motility (VFC0204)]

VFG036956(gb|WP\_002224867) (farB) fatty acid efflux system protein FarB [FarAB (VF0450) - Antimicrobial activity (VFC0204)]

VFG038277(gb|WP\_016349336) (exeE) general secretory pathway protein E [Exe T2SS (VF0478) - Effector delivery system (VFC0204)]

VFG000886(gb|WP\_000261297) (papJ) P pilus assembly protein PapJ [P fimbriae (VF0220) - Adherence (VFC0204)]

VFG048429(gb|WP\_004183353) (entE) enterobactin synthase subunit E [Ent (VF0562) - Nutritional/Metabolic factor (VFC0272)]

VFG002533(gb|WP\_009938926) (motB) flagellar motor protein MotB [Flagella (VF0430) - Motility (VFC0204)]

VFG038309(gb|WP\_016349344) (exeM) general secretion pathway protein M [Exe T2SS (VF0478) - Effector delivery system (VFC0204)]

VFG037822(gb|WP\_000240700) (lpxC) UDP-3-O-acyl-N-acetylglucosamine deacetylase [LPS (VF0466) - Immune modulation (VFC0204)]

VFG001819(gb|NP\_216894) (mbtG) Lysine-N-oxygenase MbtG (L-lysine 6-monooxygenase) (lysine N6-hydroxylase) [Lysine N6-hydroxylase (VF0359) - Exoenzyme (VFC0251)]

VFG048665(gb|WP\_004176431) (dotU/tssL) type VI secretion system protein, DotU/TssL family [T6SS (VF0562) - Effector delivery system (VFC0204)]

VFG034875(gb|WP\_001270087) (espX5) Type III secretion system effector EspX5 [TTSS secreted effectors (VF0711) - Effector delivery system (VFC0204)]

VFG002276(gb|WP\_011009653) (colA) collagenase [Kappa-toxin (VF0388) - Exoenzyme (VFC0251)] [Clostridium perfringens]

VFG034932(gb|WP\_000953022) (nleB1) Type III secretion system effector nleB1 [TTSS secreted effectors (VF0711) - Effector delivery system (VFC0204)]

VFG041040(gb|NP\_251058) (PA2368) hypothetical protein [HSI-3 (VF0944) - Effector delivery system (VFC0204)]

VFG038820(gb|WP\_161785096) (flgA) flagella basal body P-ring formation protein FlgA [Polar flagella (VF0473) - Motility (VFC0204)]

VFG000190(gb|NP\_250386) (pscP) type III secretion system protein PscP [TTSS (VF0083) - Effector delivery system (VFC0204)]

VFG048797(gb|WP\_004175261) (ugd) UDP-glucose 6-dehydrogenase [Capsule (VF0560) - Immune modulation  
VFG037513(gb|WP\_085947930) (ACICU\_RS04590) porin family protein [HemO cluster (VF0636) - Nutritional  
VFG038464(gb|WP\_011707389) (tapT) twitching ATPase [Tap type IV pili (VF0475) - Adherence (VFC0001)]  
VFG049912 (tssC) Type VI secretion system protein TssC [T6SS (VF0579) - Effector delivery system (VFC008  
VFG048779(gb|WP\_004190503) (tssG) type VI secretion system baseplate subunit TssG [T6SS (VF0569) - Effe  
VFG000925(gb|WP\_000140634) (fepC) ferrienterobactin ABC transporter ATPase [Enterobactin (VF0228) - Nu  
VFG034866(gb|WP\_000900547) (espX4) Type III secretion system effector EspX4 [TTSS secreted effectors (VF  
VFG015950(gb|NP\_251075) (pvdQ) 3-oxo-C12-homoserine lactone acylase PvdQ [Pyoverdine (VF0094) - Nutri  
VFG038132(gb|WP\_000045495) (pgi) glucose-6-phosphate isomerase [Capsule (VF0465) - Immune modulation  
VFG000478(gb|NP\_459678) (fur) ferric iron uptake transcriptional regulator [Fur (VF0113) - Regulation (VFC0  
VFG048762(gb|WP\_015874732) (impA/tssA) type VI secretion system protein TssA [T6SS (VF0569) - Effector  
VFG048819(gb|WP\_014907234) (KP1\_RS17280) mannose-1-phosphate guanylyltransferase/mannose-6-phosph  
VFG016058(gb|NP\_251114) (pvdL) peptide synthase PvdL [Pyoverdine (VF0094) - Nutritional/Metabolic factor  
VFG041278(gb|WP\_010947155) (vpdC) Dot/Icm type IV secretion system effector VpdC [Dot/Icm T4SS secre  
VFG038346(gb|WP\_005320760) (acr1) Type III secretion system gatekeeper subunit [T3SS (VF0479) - Effector  
VFG038631(gb|WP\_011705273) (fliG) flagellar motor switch protein G [Polar flagella (VF0473) - Motility (VFC  
VFG045790(gb|WP\_000833288) (cgsE) curli production assembly/transport protein CsgE [Curli fibers (VF1138)  
VFG000216(gb|NP\_250412) (pscH) type III secretion system protein PscH [TTSS (VF0083) - Effector delivery s  
VFG001959(gb|YP\_002344814) (hddC) capsular polysaccharide heptosyltransferase [Capsule (VF0323) - Immun  
VFG048547(gb|WP\_004213617) (iroN) salmochelin receptor IroN [Sal (VF0563) - Nutritional/Metabolic factor  
VFG050457(gb|WP\_001274990.1) (pilB) type IV-A pilus assembly ATPase PilB [TFP (VF1334) - Adherence (V  
VFG050222(gb|NP\_219545) (glgX) glycogen hydrolase [TTSS secreted effectors (VF0711) - Effector delivery sy  
VFG000270(gb|WP\_000724295) (ureB) urease beta subunit UreB, urea amidohydrolase [Urease (VF0050) - Stre  
VFG034849(gb|WP\_000129338) (espX1) Type III secretion system effector EspX1 [TTSS secreted effectors (VF  
VFG048676(gb|WP\_014907726) (ompA) OmpA family protein [T6SS (VF0569) - Effector delivery system (VFC  
VFG050400(gb|WP\_000347039.1) (pilU) PilT/PilU family type 4a pilus ATPase [TFP (VF1334) - Adherence (V  
VFG038876(gb|WP\_005314259) (lfgG) lateral flagellar basal-body rod protein LfgG [Lateral flagella (VF0474) -  
VFG013374(gb|WP\_005693262) (lpxD) UDP-3-O-(3-hydroxymyristoyl) glucosamine N-acyltransferase [LOS (V  
VFG034754(gb|WP\_000081129) (espL1) Type III secretion system effector espL1 [TTSS secreted effectors (VF  
VFG000192(gb|NP\_250388) (pscN) type III secretion system ATPase PscN [TTSS (VF0083) - Effector delivery  
VFG002413(gb|WP\_000389022) (ykgK/ecpR) regulator protein EcpR [ECP (VF0404) - Adherence (VFC0001)]  
VFG035909(gb|WP\_001216023) (aatA) outer membrane protein AatA [Dispersin (VF0215) - Others (VFC0346)  
VFG043465(gb|WP\_010976622) (pfbA) cell wall surface anchor family protein, Plasminogen- and Fibronectin-b  
VFG002501(gb|WP\_004197167) (fliG) flagellar motor switch protein G [Flagella (VF0430) - Motility (VFC0204  
VFG037777(gb|WP\_000867091) (lpsB) glycosyltransferase family 4 protein [LPS (VF0466) - Immune modulation  
VFG049150(gb|WP\_000982270) (clbD) colibactin biosynthesis dehydrogenase ClbD [Colibactin (VF0573) - Exo  
VFG038367(gb|WP\_011705045) (vgrG1) Type VI secretion system effector VgrG1, ADP-ribosyltransferase [T6  
VFG002188(gb|WP\_002362618) (cpsC) teichoic acid biosynthesis protein, putative [Capsule (VF0361) - Immun  
VFG050229(gb|NP\_219638) (CT\_135) hypothetical protein [TTSS secreted effectors (VF0711) - Effector deliver  
VFG000337(gb|WP\_005693332) (iga1) immunoglobulin A1 protease [IgA1 protease (VF0045) - Exoenzyme (VFC  
VFG049903(gb|WP\_001240533) (tssA) Type VI secretion system protein TssA [T6SS (VF0579) - Effector deliv  
VFG013066 (shuW) heme anaerobic degradation radical SAM methyltransferase ChuW/HutW [Shu (VF0256) - I  
VFG000123(gb|NP\_252231) (alg8) alginate-c5-mannuronan-epimerase AlgG [Alginate (VF0091) - Biofilm (VFC  
VFG049118(gb|WP\_012737529) (allR) DNA-binding transcriptional repressor AllR [Allantoin utilization (VF05  
VFG002063(gb|NP\_248767) (icmF1/tssM1) type VI secretion system protein IcmF1 [HSI-I (VF0334) - Effector  
VFG034612(gb|WP\_000225871) (cfaA) colonisation factor antigen a, chaperone [Adhesive fimbriae (VF0213) -



VFG000137(gb|NP\_251850) (wzz) O-antigen chain length regulator [LPS (VF0085) - Immune modulation (VFC0271)] [Pseudomonas aeruginosa (VF0001)]

VFG014984(gb|NP\_253136) (algW) AlgW protein [Alginate (VF0091) - Biofilm (VFC0271)] [Pseudomonas aeruginosa (VF0001)]

VFG050910(gb|WP\_001178477.1) (vgrG/tssI) type VI secretion system tip protein VgrG [T6SS (VF1337) - Effector delivery system (VFC0271)] [Pseudomonas aeruginosa (VF0001)]

VFG037344(gb|WP\_000717759) (basC) acinetobactin biosynthesis protein BasC [Acinetobactin (VF0467) - Nutrient acquisition (VFC0271)] [Acinetobacter baumannii (VF0001)]

VFG049149(gb|WP\_041169023) (clbC) colibactin polyketide synthase ClbC [Colibactin (VF0573) - Exotoxin (VFC0271)] [Escherichia coli (VF0001)]

VFG000877(gb|WP\_001244821) (fimF) FimF protein precursor [Type 1 fimbriae (VF0221) - Adherence (VFC0271)] [Escherichia coli (VF0001)]

VFG034817(gb|WP\_000671691) (espR1) Type III secretion system effector espR1 [TTSS secreted effectors (VF0221) - Adherence (VFC0271)] [Escherichia coli (VF0001)]

VFG013368(gb|WP\_005693225) (rffG) dTDP-glucose 46-dehydratase [LOS (VF0044) - Immune modulation (VFC0271)] [Escherichia coli (VF0001)]

VFG000929(gb|WP\_001375021) (entD) phosphopantetheinyl transferase component of enterobactin synthase multienzyme complex [Enterobactin (VF0001) - Iron acquisition (VFC0271)] [Escherichia coli (VF0001)]

VFG000130(gb|NP\_252238) (algI) alginate o-acetyltransferase AlgI [Alginate (VF0091) - Biofilm (VFC0271)] [Pseudomonas aeruginosa (VF0001)]

VFG000930(gb|WP\_000077767) (entF) enterobactin synthase multienzyme complex component, ATP-dependent phosphotransferase [Enterobactin (VF0001) - Iron acquisition (VFC0271)] [Escherichia coli (VF0001)]

VFG038351(gb|WP\_005320747) (ascQ) type III secretion system protein AscQ [T3SS (VF0479) - Effector delivery system (VFC0271)] [Yersinia enterocolitica (VF0001)]

VFG046680(gb|WP\_003020700) (FTT\_RS04120) ABC transporter ATP-binding protein [Capsule (VF0543) - Immune modulation (VFC0271)] [Yersinia enterocolitica (VF0001)]

VFG050670(gb|WP\_000505931.1) (pilJ) methyl-accepting chemotaxis protein [TFP (VF1334) - Adherence (VFC0271)] [Yersinia enterocolitica (VF0001)]

VFG016046(gb|NP\_251103) (pvdH) diaminobutyrate-2-oxoglutarate aminotransferase PvdH [Pyoverdine (VF0001) - Iron acquisition (VFC0271)] [Pseudomonas aeruginosa (VF0001)]

VFG038557(gb|WP\_011705350) (flp1) Flp pilus pilin subunit [Flp type IV pili (VF0476) - Adherence (VFC0271)] [Pseudomonas aeruginosa (VF0001)]

VFG048998(gb|WP\_011154608) (rmpA2) regulator of mucoid phenotype RmpA2 [RmpA (VF0570) - Regulation of virulence (VFC0271)] [Pseudomonas aeruginosa (VF0001)]

VFG002489(gb|WP\_181937968) (tssM-5) Type VI secretion system protein TssM [T6SS-1 (VF0429) - Effector delivery system (VFC0271)] [Pseudomonas aeruginosa (VF0001)]

VFG051303(gb|NP\_219923.1) (pmpB) polymorphic membrane protein PmpB [Pmps (VF1346) - Adherence (VFC0271)] [Pseudomonas aeruginosa (VF0001)]

VFG014893(gb|NP\_254009) (algC) phosphomannomutase AlgC [Alginate (VF0091) - Biofilm (VFC0271)] [Pseudomonas aeruginosa (VF0001)]

VFG001248(gb|NP\_249788) (fleQ) transcriptional regulator FleQ [Flagella (VF0273) - Motility (VFC0204)] [Pseudomonas aeruginosa (VF0001)]

VFG048697(gb|WP\_015874721) (clpV/tssH) type VI secretion system ATPase TssH [T6SS (VF0569) - Effector delivery system (VFC0271)] [Pseudomonas aeruginosa (VF0001)]

VFG014668(gb|NP\_252042) (flgN) flagella synthesis protein FlgN [Flagella (VF0273) - Motility (VFC0204)] [Pseudomonas aeruginosa (VF0001)]

VFG041906(gb|WP\_005463180) (VP\_RS21695) type III secretion system chaperone [T3SS2 (VF0409) - Effector delivery system (VFC0271)] [Yersinia enterocolitica (VF0001)]

VFG000429(gb|WP\_010989299) (tviD) Vi polysaccharide biosynthesis protein TviD [Vi antigen (VF0101) - Immune modulation (VFC0271)] [Yersinia enterocolitica (VF0001)]

VFG037720(gb|WP\_001027056) (adeG) cation/multidrug efflux pump [AdeFGH efflux pump (VF0504) - Biofilm formation (VFC0271)] [Yersinia enterocolitica (VF0001)]

VFG037177(gb|WP\_000632986) (plc2) phospholipase C [Phospholipase C (VF0470) - Exotoxin (VFC0235)] [Yersinia enterocolitica (VF0001)]

VFG001246(gb|NP\_249783) (fliC) B-type flagellin [Flagella (VF0273) - Motility (VFC0204)] [Pseudomonas aeruginosa (VF0001)]

VFG001278(gb|WP\_000069296) (ebp) cell surface elastin binding protein [EbpS (VF0008) - Adherence (VFC0271)] [Pseudomonas aeruginosa (VF0001)]

VFG017842(gb|WP\_011988521) (pilQ) type IV pilus biogenesis protein PilQ [Type IV pili (VF0401) - Adherence (VFC0271)] [Pseudomonas aeruginosa (VF0001)]

VFG050470(gb|WP\_000279216.1) (pilC) type II secretion system F family protein [TFP (VF1334) - Adherence (VFC0271)] [Pseudomonas aeruginosa (VF0001)]

VFG002052(gb|WP\_000820136) (gspI) general secretion pathway protein I [T2SS (VF0333) - Effector delivery system (VFC0271)] [Pseudomonas aeruginosa (VF0001)]

VFG038293(gb|WP\_016349340) (exeI) general secretion pathway protein I [Exe T2SS (VF0478) - Effector delivery system (VFC0271)] [Pseudomonas aeruginosa (VF0001)]

VFG024730(gb|NP\_217462) (pks1) polyketide synthase [PDIM (VF0309) - Immune modulation (VFC0258)] [Mycobacterium tuberculosis (VF0001)]

VFG045464(gb|WP\_000562556) (tcpC) Tir domain containing protein TcpC [TcpC (VF0413) - Immune modulation (VFC0271)] [Yersinia enterocolitica (VF0001)]

VFG037218(gb|WP\_000983821) (basJ) acinetobactin biosynthesis protein BasJ [Acinetobactin (VF0467) - Nutrient acquisition (VFC0271)] [Acinetobacter baumannii (VF0001)]

VFG045544(gb|WP\_010947524) (mavB) Dot/Icm type IV secretion system effector mavB [Dot/Icm T4SS secreted effectors (VF0467) - Nutrient acquisition (VFC0271)] [Acinetobacter baumannii (VF0001)]

VFG049163(gb|WP\_000065646) (clbQ) colibactin biosynthesis thioesterase ClbQ [Colibactin (VF0573) - Exotoxin (VFC0271)] [Escherichia coli (VF0001)]

VFG001256(gb|NP\_250134) (fliM) flagellar motor switch protein FliM [Flagella (VF0273) - Motility (VFC0204)] [Pseudomonas aeruginosa (VF0001)]

VFG048551(gb|WP\_011251260) (iroC) ABC transporter [Sal (VF0563) - Nutritional/Metabolic factor (VFC0272)] [Yersinia enterocolitica (VF0001)]

VFG039753(gb|WP\_011190903) (rvhB1) type IV secretion system protein [Rvh T4SS (VF0488) - Effector delivery system (VFC0271)] [Yersinia enterocolitica (VF0001)]

VFG050270(gb|NP\_220318) (glgA) glycogen synthase [TTSS secreted effectors (VF0711) - Effector delivery system (VFC0271)] [Yersinia enterocolitica (VF0001)]

VFG011087(gb|WP\_010929841) (bopC/bteA) Bordetella Bsc type III secretion system secreted protein BteA [TTSS secreted effectors (VF0711) - Effector delivery system (VFC0271)] [Bordetella pertussis (VF0001)]

VFG048808(gb|WP\_004899416) (rfbK1) O9 family phosphomannomutase RfbK1 [Capsule (VF0560) - Immune modulation (VFC0271)] [Yersinia enterocolitica (VF0001)]

VFG002321(gb|WP\_011816589) (fliC) flagellin [Flagella (VF0394) - Motility (VFC0204)] [Yersinia enterocolitica (VF0001)]

VFG038727(gb|WP\_011705295) (cheW) chemotaxis protein CheW [Polar flagella (VF0473) - Motility (VFC0204)] [Yersinia enterocolitica (VF0001)]

VFG045569(gb|WP\_010948086) (LPG\_RS11990) Dot/Icm type IV secretion system effector [Dot/Icm T4SS sec  
VFG038880(gb|WP\_005314250) (lfgK) lateral flagellar hook-associated protein [Lateral flagella (VF0474) - Mot  
VFG038413(gb|WP\_043118350) (fimC) outer membrane usher protein [Type I pili (VF0486) - Adherence (VFC  
VFG041016(gb|NP\_250349) (PA1658) hypothetical protein [HSI-2 (VF0943) - Effector delivery system (VFC00  
VFG038619(gb|WP\_016349413) (motX) sodium-type flagellar motor component [Polar flagella (VF0473) - Mot  
VFG038374(gb|WP\_011705709) (atsB) Type VI secretion system protein [T6SS (VF0480) - Effector delivery sv  
VFG038890(gb|WP\_005314213) (lafU) LafU, chemotaxis protein [Lateral flagella (VF0474) - Motility (VFC020  
VFG038324(gb|WP\_005320804) (ascH) Type III secretion system protein AscH, regulator needle assembling [T  
VFG000056(gb|WP\_010930825) (bopD) Bordetella Bsc type III secretion system secreted protein BopD, comple  
VFG005969(gb|WP\_000902274) (SP\_RS01735) polysaccharide pyruvyl transferase family protein [Capsule (VF  
VFG040815(gb|WP\_041471735) (rickA) WASP, N-WASP, MENA proteins [RickA (VF0490) - Motility (VFC0  
VFG002333(gb|WP\_005168827) (fliK) flagellar hook-length control protein FliK [Flagella (VF0394) - Motility (V  
VFG049915(gb|WP\_001142968) (hcp2/tssD2) Type VI secretion system protein, Hcp family [T6SS (VF0579) - M  
VFG041027(gb|NP\_250360) (PA1669) hypothetical protein [HSI-2 (VF0943) - Effector delivery system (VFC00  
VFG001145(gb|CAA83901) (hifB) periplasmic chaperone [Haemagglutinating pili (VF0036) - Adherence (VFC0  
VFG045793(gb|WP\_000771429) (csgA) curlin major subunit CsgA [Curli fibers (VF1138) - Adherence (VFC00  
VFG012505(gb|WP\_000933673) (iroD) esterase [Salmocheilin siderophore (VF0230) - Nutritional/Metabolic fac  
VFG007832(gb|NP\_217448) (ppsB) phthiocerol synthesis polyketide synthase type I PpsB [PDIM (VF0309) - Im  
VFG038301(gb|WP\_016349342) (exeK) general secretion pathway protein K [Exe T2SS (VF0478) - Effector del  
VFG038832(gb|WP\_016351724) (pomB2) flagellar motor protein MotB [Polar flagella (VF0473) - Motility (VFC  
VFG000928(gb|WP\_000640938) (fepG) iron-enterobactin ABC transporter permease [Enterobactin (VF0228) - M  
VFG034880(gb|WP\_000535069) (espX6) Type III secretion system effector EspX6 [TTSS secreted effectors (VF  
VFG034756 (espL1) Type III secretion system effector espL1 [TTSS secreted effectors (VF1111) - Effector deliv  
VFG038448(gb|WP\_016351632) (tapN) type IV pilus biogenesis protein PilN [Tap type IV pili (VF0475) - Adhe  
VFG005584(gb|WP\_000403400) (hylB) hyaluronidase [Hyaluronidase (VF0281) - Exoenzyme (VFC0251)] [Stre  
VFG038317(gb|WP\_016352170) (tapD/pilD) prepilin peptidase [Tap type IV pili (VF0475) - Adherence (VFC00  
VFG043018(gb|NP\_252039) (PA3349) chemotaxis protein [Flagella (VF0273) - Motility (VFC0204)] [Pseudom  
VFG040863(gb|WP\_011190526) (sca2) cell surface antigen Sca2 [Sca2 (VF0495) - Motility (VFC0204)] [Ricket  
VFG038176(gb|WP\_000777882) (ompA) outer membrane protein OmpA [OmpA (VF0464) - Immune modulating  
VFG038635(gb|WP\_016350051) (fliH) flagellar assembly protein FliH [Polar flagella (VF0473) - Motility (VFC  
VFG000198(gb|NP\_250394) (pcrD) type III secretion system protein PcrD [TTSS (VF0083) - Effector delivery s  
VFG045349(gb|WP\_000092542) (fdeC) adhesin FdeC [FdeC (VF0506) - Adherence (VFC0001)] [Escherichia co  
VFG002054(gb|WP\_000633233) (gspK) general secretion pathway protein K [T2SS (VF0333) - Effector delivery  
VFG002051(gb|WP\_001115126) (gspH) general secretion pathway protein H [T2SS (VF0333) - Effector delivery  
VFG049158(gb|WP\_001297937) (clbL) colibactin biosynthesis amidase ClbL [Colibactin (VF0573) - Exotoxin (V  
VFG038468(gb|WP\_016351972) (tapU) twitching ATPase [Tap type IV pili (VF0475) - Adherence (VFC0001)]  
VFG045491(gb|WP\_010946113) (LPG\_RS01820) Dot/Icm type IV secretion system effector [Dot/Icm T4SS sec  
VFG000875(gb|WP\_000066579) (fimC) Chaperone protein fimC precursor [Type 1 fimbriae (VF0221) - Adherence  
VFG050282(gb|WP\_000843487) (vpsJ) exopolysaccharide biosynthesis protein VpsJ [VPS (VF0615) - Biofilm (V  
VFG002351(gb|WP\_005160463) (flgB) flagellar basal-body rod protein FlgB [Flagella (VF0394) - Motility (VFC  
VFG003624(gb|WP\_011815750) (yplA) DUF2974 domain-containing protein [YplA (VF0622) - Exotoxin (VFC  
VFG000166(gb|NP\_252916) (pchE) dihydroaeruginosic acid synthetase PchE [Pyochelin (VF0095) - Nutritional/M  
VFG001264(gb|NP\_250144) (flhF) flagellar biosynthesis protein FlhF [Flagella (VF0273) - Motility (VFC0204)]  
VFG001382(gb|YP\_177730) (pcaA) cyclopropane mycolic acid synthase [PcaA (VF0285) - Others (VFC0346)] [Mycobacter  
VFG000926(gb|WP\_001443194) (fepD) ferrienterobactin ABC transporter permease [Enterobactin (VF0228) - N  
VFG001014(gb|NP\_858288) (spa29) type III secretion system minor export apparatus protein Spa29 [TTSS (VFC

VFG038529(gb|WP\_016350153) (flpG) Flp pilus assembly protein FlpG [Flp type IV pili (VF0476) - Adherence (VFC0001)] [Campylobacter jejuni (VF0114) - Motility (VFC0204)] [Campylobacter jejuni (VF0114) - Motility (VFC0204)]

VFG001904(gb|YP\_002343808) (Cj0371) hypothetical protein [Flagella (VF0114) - Motility (VFC0204)] [Campylobacter jejuni (VF0114) - Motility (VFC0204)]

VFG037505(gb|WP\_002002089) (ACICU\_RS04585) transferrin-binding protein-like solute binding protein [Hemolysin A (VF0225) - Exotoxin (VFC0235)] [Escherichia coli (VF0225) - Exotoxin (VFC0235)]

VFG012333(gb|WP\_000703306) (sfaD) S fimbriae minor subunit SfaD [S fimbriae (VF0222) - Adherence (VFC0001)] [Clostridium difficile (VF0222) - Adherence (VFC0001)]

VFG012095(gb|WP\_003435012) (groEL) chaperonin GroEL [GroEL (VF0594) - Adherence (VFC0001)] [Clostridium difficile (VF0594) - Adherence (VFC0001)]

VFG038472(gb|WP\_011706550) (tapW) twitching ATPase [Tap type IV pili (VF0475) - Adherence (VFC0001)] [Campylobacter jejuni (VF0475) - Adherence (VFC0001)]

VFG000906(gb|WP\_001142375) (hlyA) Hemolysin A [-Hemolysin (VF0225) - Exotoxin (VFC0235)] [Escherichia coli (VF0225) - Exotoxin (VFC0235)]

VFG049160(gb|WP\_001327259) (clbN) colibactin non-ribosomal peptide synthetase ClbN [Colibactin (VF0573) - Adherence (VFC0001)] [Clostridium difficile (VF0573) - Adherence (VFC0001)]

VFG050158(gb|WP\_000905916) (kpsE) Capsule polysaccharide export inner-membrane protein [K1 capsule (VF0573) - Adherence (VFC0001)] [Clostridium difficile (VF0573) - Adherence (VFC0001)]

VFG045609(gb|WP\_010948684) (LPG\_RS15170) Dot/Icm type IV secretion system effector [Dot/Icm T4SS secretion system (VF0573) - Adherence (VFC0001)] [Clostridium difficile (VF0573) - Adherence (VFC0001)]

VFG038800(gb|WP\_016351322) (flgD) flagellar hook capping protein [Polar flagella (VF0473) - Motility (VFC0204)] [Campylobacter jejuni (VF0473) - Motility (VFC0204)]

VFG022051(gb|NP\_214798) (eccC3) Type VII secretion system protein EccC3 [ESX-3 (VF0521) - Effector delivery (VFC0001)] [Mycobacterium tuberculosis (VF0521) - Effector delivery (VFC0001)]

VFG000430(gb|WP\_000127915) (tviC) Vi polysaccharide biosynthesis protein, epimerase TviC [Vi antigen (VF0521) - Effector delivery (VFC0001)] [Mycobacterium tuberculosis (VF0521) - Effector delivery (VFC0001)]

VFG045514(gb|WP\_010946881) (LPG\_RS05710) Dot/Icm type IV secretion system effector [Dot/Icm T4SS secretion system (VF0573) - Adherence (VFC0001)] [Clostridium difficile (VF0573) - Adherence (VFC0001)]

VFG006167(gb|WP\_002225356) (pilX) type IV pilus minor pilin PilX [Type IV pili (VF0075) - Adherence (VFC0001)] [Campylobacter jejuni (VF0075) - Adherence (VFC0001)]

VFG001214(gb|NP\_253237) (pilR) two-component response regulator PilR [Type IV pili (VF0082) - Adherence (VFC0001)] [Campylobacter jejuni (VF0082) - Adherence (VFC0001)]

VFG037400(gb|WP\_001223274) (bauC) ferric siderophore ABC transporter, permease protein BauC [Acinetobacter baumannii (VF0374) - Adherence (VFC0001)] [Acinetobacter baumannii (VF0374) - Adherence (VFC0001)]

VFG045608(gb|WP\_010948659) (LPG\_RS15050) Dot/Icm type IV secretion system effector [Dot/Icm T4SS secretion system (VF0573) - Adherence (VFC0001)] [Clostridium difficile (VF0573) - Adherence (VFC0001)]

VFG000129(gb|NP\_252237) (algL) poly(beta-d-mannuronate) lyase precursor AlgL [Alginate (VF0091) - Biofilm formation (VFC0001)] [Pseudomonas aeruginosa (VF0091) - Biofilm formation (VFC0001)]

VFG043211(gb|WP\_032902679) (cheA) chemotaxis protein CheA [Flagella (VF0394) - Motility (VFC0204)] [Yersinia enterocolitica (VF0394) - Motility (VFC0204)]

VFG000363(gb|WP\_002212775) (irp2) yersiniabactin biosynthetic protein Irp2 [Yersiniabactin (VF0136) - Nutritional/Metabolic factor (VFC0001)] [Yersinia enterocolitica (VF0136) - Nutritional/Metabolic factor (VFC0001)]

VFG045792(gb|WP\_000791650) (csgB) curlin minor subunit CsgB [Curli fibers (VF1138) - Adherence (VFC0001)] [Escherichia coli (VF1138) - Adherence (VFC0001)]

VFG000912(gb|WP\_001443207) (focD) F1C fimbrial usher [F1C fimbriae (VF0224) - Adherence (VFC0001)] [Enterococcus faecalis (VF0224) - Adherence (VFC0001)]

VFG044159(gb|WP\_000125846) (fes) enterobactin/ferric enterobactin esterase [Enterobactin (VF0228) - Nutritional/Metabolic factor (VFC0001)] [Enterobacteriaceae (VF0228) - Nutritional/Metabolic factor (VFC0001)]

VFG002492(gb|WP\_004184995) (fliN) flagellar motor switch protein FliN [Flagella (VF0430) - Motility (VFC0204)] [Yersinia enterocolitica (VF0430) - Motility (VFC0204)]

VFG034922(gb|WP\_001303732) (espY5) hypothetical protein [TTSS secreted effectors (VF1110) - Effector delivery (VFC0001)] [Yersinia enterocolitica (VF1110) - Effector delivery (VFC0001)]

VFG038683(gb|WP\_016350056) (flhA) flagellar biosynthesis protein FlhA [Polar flagella (VF0473) - Motility (VFC0204)] [Campylobacter jejuni (VF0473) - Motility (VFC0204)]

VFG000873(gb|WP\_000695571) (fimA) Type-1 fimbrial protein, A chain precursor [Type 1 fimbriae (VF0221) - Adherence (VFC0001)] [Enterococcus faecalis (VF0221) - Adherence (VFC0001)]

VFG038840(gb|WP\_005300916) (flmH) short chain dehydrogenase/reductase family oxidoreductase [Polar flagella (VF0473) - Motility (VFC0204)] [Campylobacter jejuni (VF0473) - Motility (VFC0204)]

VFG042979(gb|WP\_002379311) (srtC) sortase [Ebp pili (VF0538) - Adherence (VFC0001)] [Enterococcus faecalis (VF0538) - Adherence (VFC0001)]

VFG038699(gb|WP\_010634617) (cheY) chemotaxis protein CheY [Polar flagella (VF0473) - Motility (VFC0204)] [Campylobacter jejuni (VF0473) - Motility (VFC0204)]

VFG049156(gb|WP\_077265119) (clbJ) colibactin non-ribosomal peptide synthetase ClbJ [Colibactin (VF0573) - Adherence (VFC0001)] [Clostridium difficile (VF0573) - Adherence (VFC0001)]

VFG001936(gb|YP\_002344528) (Cj1135) glucosyltransferase [LOS (VF0326) - Immune modulation (VFC0258)] [Campylobacter jejuni (VF0326) - Immune modulation (VFC0258)]

VFG050115(gb|WP\_002081542) (cesA) Cereulide synthetase A, CesA [Cereulide (VF0583) - Exotoxin (VFC0235)] [Bacillus cereus (VF0583) - Exotoxin (VFC0235)]

VFG038687(gb|WP\_016350057) (flhF) flagellar biosynthesis protein FlhF [Polar flagella (VF0473) - Motility (VFC0204)] [Campylobacter jejuni (VF0473) - Motility (VFC0204)]

VFG038804(gb|WP\_011706643) (flgC) flagellar basal body rod protein FlgC [Polar flagella (VF0473) - Motility (VFC0204)] [Campylobacter jejuni (VF0473) - Motility (VFC0204)]

VFG038513(gb|WP\_016350157) (flpK) Flp pilus pseudopilin [Flp type IV pili (VF0476) - Adherence (VFC0001)] [Campylobacter jejuni (VF0476) - Adherence (VFC0001)]

VFG044333(gb|WP\_015874968) (fyuA) yersiniabactin receptor FyuA [Ybt (VF0564) - Nutritional/Metabolic factor (VFC0001)] [Yersinia enterocolitica (VF0564) - Nutritional/Metabolic factor (VFC0001)]

VFG000983(gb|WP\_000517827) (rtxA) RTX toxin RtxA [MARTX (VF0265) - Exotoxin (VFC0235)] [Vibrio cholerae (VF0265) - Exotoxin (VFC0235)]

VFG048317(gb|WP\_014906959) (fimK) transcriptional regulator [Type I fimbriae (VF0566) - Adherence (VFC0001)] [Yersinia enterocolitica (VF0566) - Adherence (VFC0001)]

VFG038600(gb|WP\_016349156) (mshL) MSHA (mannose-sensitive hemagglutinin) pili biogenesis protein MshL [Polar flagella (VF0473) - Motility (VFC0204)] [Campylobacter jejuni (VF0473) - Motility (VFC0204)]

VFG002070(gb|NP\_248774) (hsiC1/vipB/tssC) type VI secretion system tubule-forming protein VipB [HSI-I (VF0566) - Adherence (VFC0001)] [Yersinia enterocolitica (VF0566) - Adherence (VFC0001)]

VFG044324(gb|WP\_032447693) (ybtX) yersiniabactin-associated zinc MFS transporter YbtX [Ybt (VF0564) - Nutritional/Metabolic factor (VFC0001)] [Yersinia enterocolitica (VF0564) - Nutritional/Metabolic factor (VFC0001)]

VFG001820(gb|NP\_216895) (mbtF) Peptide synthetase MbtF (peptide synthase) [Mycobactin (VF0299) - Nutritional/Metabolic factor (VFC0001)] [Mycobacterium tuberculosis (VF0299) - Nutritional/Metabolic factor (VFC0001)]

VFG000181(gb|NP\_251792) (xcpS) general secretion pathway protein F [Xcp secretion system (VF0084) - Effector delivery (VFC0001)] [Mycobacterium tuberculosis (VF0084) - Effector delivery (VFC0001)]

VFG038884(gb|WP\_005314225) (lafC) LafC, flagellar export chaperone [Lateral flagella (VF0474) - Motility (VFC0001)] [Campylobacter jejuni (VF0474) - Motility (VFC0001)]

VFG038305(gb|WP\_016349343) (exeL) general secretion pathway protein L [Exe T2SS (VF0478) - Effector deliv  
VFG049911(gb|WP\_000393837) (tssF) Type VI secretion system protein TssF [T6SS (VF0579) - Effector deliv  
VFG013660(gb|WP\_041175640) (pilO) type IV pilus inner membrane platform protein PilO [Type IV pili (VF04  
VFG000314(gb|WP\_001186109) (gluE) UDP-glucose 4-epimerase [LPS (VF0056) - Immune modulation (VFC0  
VFG048287(gb|WP\_014906962) (fimF) type 1 fimbrial minor component [Type I fimbriae (VF0566) - Adherenc  
VFG038792(gb|WP\_011706640) (flgF) flagellar basal-body rod protein FlgF [Polar flagella (VF0473) - Motility  
VFG038593(gb|WP\_016349158) (mshN) Tetratricopeptide repeat protein, PilF-like [MSHA type IV pili (VF047  
VFG019180(gb|WP\_011987710) (bont) botulinum neurotoxin, BoNT [BoNT (VF0375) - Exotoxin (VFC0235)] [Clos  
VFG038105(gb|WP\_000591436) (galU) UTP--glucose-1-phosphate uridylyltransferase GalU [Capsule (VF0465)  
VFG045818(gb|WP\_001528154) (tsh) temperature-sensitive protein Tsh [Tsh (VF0233) - Effector delivery system  
VFG035923(gb|WP\_000621745) (aatC) ATP-binding protein AatC [Dispersin (VF0215) - Others (VFC0346)] [E  
VFG050860(gb|WP\_000301479.1) (gspK) general secretion pathway protein K [T2SS (VF1335) - Effector deliv  
VFG015515(gb|NP\_252903) (phzE1) phenazine biosynthesis protein PhzE [Pyocyanin (VF0100) - Nutritional/M  
VFG038297(gb|WP\_016349341) (exeJ) general secretion pathway protein J [Exe T2SS (VF0478) - Effector deliv  
VFG041309(gb|WP\_010947685) (pieE) Dot/Icm type IV secretion system effector PieE [Dot/Icm T4SS secreted  
VFG038488(gb|WP\_016349432) (tapY1) type IV pilus biogenesis protein [Tap type IV pili (VF0475) - Adherenc  
VFG049908(gb|WP\_001080148) (tssJ) Type VI secretion system protein TssJ [T6SS (VF0579) - Effector deliv  
VFG037927(gb|WP\_000470518) (pseC) UDP-4-amino-4, 6-dideoxy-N-acetyl-beta-L-altrosamine transaminase [P  
VFG000894(gb|WP\_001239363) (papH) P pilus termination subunit PapH [P fimbriae (VF0220) - Adherence (V  
VFG001391(gb|NP\_215677) (narG) nitrate reductase subunit alpha [Nitrate reductase (VF0302) - Nutritional/Me  
VFG049919(gb|AAD32394) (bslA) s-layer protein [BslA (VF0411) - Adherence (VFC0001)] [Bacillus anthracis  
VFG000690(gb|AAP42183) (AAP42183) Bcs3' [Capsule (VF0043) - Immune modulation (VFC0258)] [Haemop  
VFG038032 (ACICU\_RS00455\*) EpsG family protein [Capsule (VF0465) - Immune modulation (VFC0258)] [A  
VFG036992(gb|WP\_002224969) (mtrD) multiple transferable resistance system protein MtrD [MtrCDE (VF0451  
VFG002357(gb|WP\_005164474) (flhB) flagellar biosynthetic protein FlhB [Flagella (VF0394) - Motility (VFC0  
VFG001279(gb|WP\_001060526) (sdrC) Ser-Asp rich fibrinogen-binding bone sialoprotein-binding protein [SDr  
VFG037428(gb|WP\_000939834) (basB) non-ribosomal peptide synthetase with condensation and peptidyl carrier  
VFG002436(gb|WP\_080341181) (boaA) surface-exposed protein, autotransporter [BoaA (VF0434) - Adherence  
VFG002486(gb|WP\_004533362) (tssJ-5) Type VI secretion system protein TssJ [T6SS-1 (VF0429) - Effector deliv  
VFG050164(gb|WP\_000723250) (neuC) UDP-N-acetylglucosamine 2-epimerase [K1 capsule (VF0239) - Invasio  
VFG037521(gb|WP\_000837764) (ACICU\_RS04595) TonB family protein [HemO cluster (VF0636) - Nutritional  
VFG038373(gb|WP\_011705708) (atsA) Type VI secretion system protein [T6SS (VF0480) - Effector delivery sy  
VFG043774(gb|AAB24244) (bont) botulinum neurotoxin, BoNT [BoNT (VF0375) - Exotoxin (VFC0235)] [Clos  
VFG000932(gb|WP\_000026784) (entE) 2,3-dihydroxybenzoate-AMP ligase component of enterobactin synthase  
VFG012865 (ipaH) invasion plasmid antigen IpaH [TTSS secreted effectors (VF0978) - Effector delivery system  
VFG048498(gb|WP\_012737619) (entF) enterobactin synthase subunit F [Ent (VF0562) - Nutritional/Metabolic fa  
VFG012621(gb|WP\_000189352) (chuY) ChuY [Chu (VF0234) - Nutritional/Metabolic factor (VFC0272)] [Esch  
VFG002084(gb|WP\_000619136) (clpB/vasG) type VI secretion system AAA+ family ATPase [VAS T6SS (VF0  
VFG048621(gb|WP\_004213924) (iutA) ferric aerobactin receptor IutA [Aerobactin (VF0565) - Nutritional/Metal  
VFG000872(gb|WP\_000044711) (fimE) Type 1 fimbriae Regulatory protein fimE [Type 1 fimbriae (VF0221) - A  
VFG038780(gb|WP\_011706637) (flgI) flagellar basal body P-ring protein [Polar flagella (VF0473) - Motility (V  
VFG000002(gb|WP\_010930159) (prn) pertactin precursor [Pertactin (VF0027) - Adherence (VFC0001)] [Bordet  
VFG000617(gb|NP\_709456) (iucC) aerobactin synthesis protein IucC [Aerobactin (VF0123) - Nutritional/Metab  
VFG012327(gb|WP\_011076307) (sfaC) S fimbrial switch regulatory protein SfaC [S fimbriae (VF0222) - Adher  
VFG000182(gb|NP\_251793) (xcpR) general secretion pathway protein E [Xcp secretion system (VF0084) - Effec  
VFG050166(gb|WP\_000066003) (neuB) N-acylneuraminate-9-phosphate synthase [K1 capsule (VF0239) - Invas

VFG001975(gb|YP\_002344830) (*kpsM*) capsule polysaccharide ABC transporter permease [Capsule (VF0323) -  
VFG038402(gb|WP\_011705725) (*vasK/icmF*) Type VI secretion system protein [T6SS (VF0480) - Effector deliv  
VFG002050(gb|WP\_001087302) (*gspG*) general secretion pathway protein G [T2SS (VF0333) - Effector delivery  
VFG050162(gb|WP\_001161829) (*kpsS*) Capsule polysaccharide export protein [K1 capsule (VF0239) - Invasion  
VFG042738(gb|NP\_253646) (*fimX*) protein FimX [Type IV pili (VF0082) - Adherence (VFC0001)] [Pseudomon  
VFG038879(gb|WP\_005314251) (*flgJ*) peptidoglycan hydrolase [Lateral flagella (VF0474) - Motility (VFC0204  
VFG034795 (*espN*) Type III secretion system effector EspN [TTSS secreted effectors (VF1110) - Effector delive  
VFG038395(gb|WP\_011705721) (*clpB*) type VI secretion system ATPase ClpV1 [T6SS (VF0480) - Effector deli  
VFG002274(gb|WP\_011009584) (*plc*) phospholipase C [Alpha-toxin (CpPLC) (VF0378) - Exotoxin (VFC0235)  
VFG034840(gb|WP\_001301665) (*espW*) Type III secretion system effector EspW [TTSS secreted effectors (VF1  
VFG002076(gb|NP\_248780) (*clpV1*) type VI secretion system AAA+ family ATPase [HSI-I (VF0334) - Effector  
VFG048002(gb|WP\_003022141) (*iglJ*) Type VI secretion system protein IglJ [T6SS (VF0544) - Effector delivery  
VFG001970(gb|YP\_002344825) (*Cj1442c*) sugar transferase [Capsule (VF0323) - Immune modulation (VFC025  
VFG038859(gb|WP\_005314301) (*lfiR*) lateral flagellar biosynthetic protein LfiR [Lateral flagella (VF0474) - Mo  
VFG038537(gb|WP\_016350151) (*flpE*) Flp pilus assembly protein, ATPase [Flp type IV pili (VF0476) - Adheren  
VFG037176(gb|WP\_001081735) (*plc1*) phospholipase C [Phospholipase C (VF0470) - Exotoxin (VFC0235)] [A  
VFG044325(gb|WP\_002212761) (*ybtQ*) yersiniabactin ABC transporter ATP-binding/permease protein YbtQ [Y  
VFG038329(gb|WP\_011899438) (*ascC*) Type III secretion system OM ring protein AscC [T3SS (VF0479) - Effe  
VFG000079(gb|NP\_463763) (*clpC*) endopeptidase Clp ATP-binding chain C [ClpC (VF0072) - Stress survival (V  
VFG001265(gb|NP\_250145) (*fleN*) flagellar synthesis regulator FleN [Flagella (VF0273) - Motility (VFC0204)]  
VFG048030(gb|WP\_003022143) (*pdpC*) Type VI secretion system secreted protein PdpC [T6SS (VF0544) - Effe  
VFG043205(gb|WP\_005164477) (*cheZ*) chemotaxis regulator CheZ [Flagella (VF0394) - Motility (VFC0204)] [F  
VFG002305(gb|NP\_461448) (*shdA*) AIDA autotransporter-like protein [ShdA (VF0398) - Adherence (VFC0001  
VFG034648(gb|WP\_001245988) (*cfaD/cfaE*) minor pilin and initiator [Adhesive fimbriae (VF0213) - Adherence  
VFG002395(gb|YP\_007410461) (*eccC5*) ESX-5 type VII secretion system FtsK/SpoIIIE family protein EccC5 [E  
VFG037260(gb|WP\_001095752) (*barB*) siderophore efflux system of the ABC superfamily [Acinetobactin (VF0  
VFG034908(gb|WP\_000978349) (*espY3*) Type III secretion system effector EspY3 [TTSS secreted effectors (VF  
VFG038385(gb|WP\_011705716) (*atsI*) Type VI secretion system protein [T6SS (VF0480) - Effector delivery sys  
VFG044332(gb|WP\_015874967) (*ybtE*) yersiniabactin biosynthesis salycil-AMP ligase YbtE [Ybt (VF0564) - N  
VFG001826(gb|NP\_217099) (*relA*) Probable GTP pyrophosphokinase RelA (ATP:GTP 3'-pyrophosphotransferase  
VFG051000(gb|WP\_000568832.1) (*tssF*) type VI secretion system baseplate subunit TssF [T6SS (VF1337) - Effe  
VFG046465(gb|WP\_003028672) (*tufA*) elongation factor Tu [EF-Tu (VF0460) - Adherence (VFC0001)] [Franci  
VFG016216(gb|WP\_000576719) (*alo*) thiol-activated cytolysin [ALO (VF0534) - Exotoxin (VFC0235)] [Bacillu  
VFG002099(gb|WP\_010948192) (*lepB*) Dot/Icm type IV secretion system effector LepB, Rab1 GTPase activatin  
VFG038525(gb|WP\_043118801) (*flpH*) Flp pilus assembly protein FlpH [Flp type IV pili (VF0476) - Adherence  
VFG000144(gb|NP\_249940) (*aprA*) alkaline metalloproteinase precursor [Alkaline protease (VF0090) - Exoenzy  
VFG043208(gb|WP\_005164483) (*cheR*) chemotaxis methyltransferase CheR [Flagella (VF0394) - Motility (VFC  
VFG041011(gb|NP\_248785) (*vgrG1b*) type VI secretion system substrate VgrG1b [HSI-I (VF0334) - Effector de  
VFG038596(gb|WP\_016349157) (*mshM*) membrane protein with ATPase domain, GspA-like [MSHA type IV pi  
VFG038651(gb|WP\_011705278) (*fliL*) flagellar basal body-associated protein FliL [Polar flagella (VF0473) - Mo  
VFG000164(gb|NP\_252911) (*fptA*) Fe(III)-pyochelin receptor precursor [Pyochelin (VF0095) - Nutritional/Meta  
VFG002548(gb|WP\_004550042) (*wcbR*) capsular polysaccharide biosynthesis fatty acid synthase [Capsule I (VF  
VFG016338(gb|WP\_001253006) (*inhA*) immune inhibitor A metalloprotease [InhA (VF0536) - Exoenzyme (VF  
VFG048419(gb|WP\_004210873) (*entB*) 2,3-dihydro-2,3-dihydroxybenzoate synthetase, isochroismatase [Ent (VF  
VFG038882(gb|WP\_005314247) (*maf-5*) modification accessory factor [Lateral flagella (VF0474) - Motility (VF  
VFG007857(gb|NP\_217450) (*ppsD*) phthiocerol synthesis polyketide synthase type I PpsD [PDIM (VF0309) - In

VFG002053(gb|WP\_001250462) (*gspJ*) general secretion pathway protein J [T2SS (VF0333) - Effector delivery system (VFC000000)]

VFG041018(gb|NP\_250351) (PA1660) hypothetical protein [HSI-2 (VF0943) - Effector delivery system (VFC000000)]

VFG038355(gb|WP\_005320739) (*ascU*) Type III secretion system inner membrane export apparatus protein AscU [Type III secretion system (VF0309) - Invasion (VFC000000)]

VFG007823(gb|NP\_217447) (*ppsA*) phthiocerol synthesis polyketide synthase type I PpsA [PDIM (VF0309) - Invasion (VFC000000)]

VFG001376(gb|WP\_000695335) (*cps4L*) capsular polysaccharide biosynthesis protein Cps4L [Capsule (VF0144) - Invasion (VFC000000)]

VFG044097(gb|NP\_252909) (PA4219) hypothetical protein [Pyochelin (VF0095) - Nutritional/Metabolic factor (VFC000000)]

VFG043394(gb|YP\_002343725) (*cheA*) chemotaxis histidine kinase [Flagella (VF0114) - Motility (VFC0204)]

VFG019178(gb|WP\_012291519) (*bont*) botulinum neurotoxin, BoNT [BoNT (VF0375) - Exotoxin (VFC0235)]

VFG049018(gb|WP\_002913007) (*rcsB*) transcriptional regulator RcsB [RcsAB (VF0571) - Regulation (VFC0300)]

VFG031564(gb|YP\_177826) (*PE\_PGRS30*) PE-PGRS family protein PE\_PGRS30 [PE/PE-PGRS (VF0316) - Invasion (VFC000000)]

VFG037358(gb|WP\_001073030) (*bauA*) TonB-dependent siderophore receptor BauA [Acinetobactin (VF0467) - Iron acquisition (VFC000000)]

VFG048257(gb|WP\_004174507) (*fimI*) type 1 pilus biosynthesis fimbrial protein [Type I fimbriae (VF0566) - Adherence (VFC000000)]

VFG045507(gb|WP\_010946840) (*LPG\_RS05490*) Dot/Icm type IV secretion system effector [Dot/Icm T4SS secretion system (VF0566) - Invasion (VFC000000)]

VFG001940(gb|YP\_002344532) (*wlaN*) beta-1,3 galactosyltransferase [LOS (VF0326) - Immune modulation (VFC000000)]

VFG050212(gb|WP\_011861707) (*CD2831*) SrtB-anchored collagen-binding adhesin [CD2831 (VF0598) - Adherence (VFC000000)]

VFG002159(gb|NP\_464601) (*aut*) autolysin [Auto (VF0348) - Invasion (VFC0083)] [*Listeria monocytogenes* EC42228 (VF0348) - Invasion (VFC0083)]

VFG050216(gb|WP\_011861847) (*cbpA*) collagen-binding adhesin CbpA [CbpA (VF0592) - Adherence (VFC000000)]

VFG034882(gb|WP\_000535079) (*espX6*) Type III secretion system effector EspX6 [TTSS secreted effectors (VF0309) - Invasion (VFC000000)]

VFG003645(gb|NP\_461791) (*orgA/sctK*) type III secretion system accessory cytosolic protein OrgA [TTSS (SPI-2) (VF0309) - Invasion (VFC000000)]

VFG038432(gb|WP\_016352168) (*tapB*) type IV pilus assembly ATPase, PilB-like [Tap type IV pili (VF0475) - Adherence (VFC000000)]

VFG000362(gb|WP\_002212777) (*irp1*) yersiniabactin biosynthetic protein Irp1 [Yersiniabactin (VF0136) - Nutritional/Metabolic factor (VFC000000)]

VFG046120(gb|WP\_011206514) (*MHP\_RS03455*) P102 paralog, surface adhesin [P97/P102 paralog family (VF0136) - Adherence (VFC000000)]

VFG048327(gb|WP\_004152886) (*mrkH*) transcriptional activator [Type 3 fimbriae (VF0567) - Biofilm (VFC0270)]

VFG002487(gb|WP\_004536933) (*tssK-5*) Type VI secretion system protein TssK [T6SS-1 (VF0429) - Effector delivery system (VFC0086)]

VFG038892(gb|WP\_043118302) (*aerA/act*) Aerolysin A [Aerolysin (VF0481) - Exotoxin (VFC0235)] [*Aeromonas hydrophila* (VF0481) - Exotoxin (VFC0235)]

VFG038553(gb|WP\_016350147) (*flpA*) prepilin peptidase [Flp type IV pili (VF0476) - Adherence (VFC0001)]

VFG043209(gb|WP\_005168769) (*cheD*) methyl-accepting chemotaxis protein CheD [Flagella (VF0394) - Motility (VFC0204)]

VFG051368(gb|NP\_220393.1) (*pmpG*) polymorphic membrane protein PmpG [Pmps (VF1346) - Adherence (VFC000000)]

VFG011946(gb|YP\_002344419) (*flgR*) sigma-54 associated transcriptional activator [Flagella (VF0114) - Motility (VFC0204)]

VFG038371(gb|WP\_011705707) (*vgrG2*) VgrG protein [T6SS (VF0480) - Effector delivery system (VFC0086)]

VFG011429(gb|WP\_002963985) (*acpXL*) acyl carrier protein [LPS (VF0367) - Immune modulation (VFC0258)]

VFG000845(gb|WP\_000581721) (*toxB*) cytotoxin [ToxB (VF0203) - Effector delivery system (VFC0086)] [*Escherichia coli* O157:H7 (VF0203) - Effector delivery system (VFC0086)]

VFG002465(gb|WP\_009940818) (*bsaM*) Type III secretion system protein BsaM [Bsa T3SS (VF0428) - Effector delivery system (VFC0086)]

VFG038365(gb|WP\_011705044) (*hcp1*) HcpA-like protein [T6SS (VF0480) - Effector delivery system (VFC0086)]

VFG050169(gb|WP\_000124301) (*kpsM*) Polysialic acid transport protein [K1 capsule (VF0239) - Invasion (VFC000000)]

VFG038505(gb|WP\_011705643) (*tapF*) type IV pilus biogenesis/stability protein, pilW-like [Tap type IV pili (VF0475) - Adherence (VFC000000)]

VFG014950(gb|NP\_249457) (*mucD*) serine protease MucD precursor [Alginate (VF0091) - Biofilm (VFC0271)]

VFG049916(gb|WP\_000103365) (*vgrG/tssI*) type VI secretion system effector VgrG [T6SS (VF0579) - Effector delivery system (VFC0086)]

VFG002048(gb|WP\_000249362) (*gspE*) general secretion pathway protein E [T2SS (VF0333) - Effector delivery system (VFC000000)]

VFG038862(gb|WP\_011898282) (*lafK*) two-component system lateral flagellar response regulator [Lateral flagellar response regulator (VF0333) - Motility (VFC0204)]

VFG045632(gb|WP\_002286924) (*ecbA/fss3*) Collagen binding MSCRAMM, EcbA/Fss3 [EcbA (VF0539) - Adherence (VFC000000)]

VFG038541(gb|WP\_016350150) (*flpD*) Flp pilus assembly protein FlpD [Flp type IV pili (VF0476) - Adherence (VFC000000)]

VFG041109(gb|NP\_459283) (*STM0285*) hypothetical protein [SCI (Salmonella centrisome island) (VF0974) - Effector delivery system (VFC0086)]

VFG002029(gb|WP\_010874666) (*hmw2*) cytoadherence protein [Cytoadherence organelle (VF0330) - Adherence (VFC000000)]

VFG001243(gb|NP\_249776) (*flgJ*) flagellar rod assembly protein/muramidase FlgJ [Flagella (VF0273) - Motility (VFC0204)]

VFG040422(gb|WP\_011190749) (*rvhD4*) type IV secretion system component VirD4 [Rvh T4SS (VF0488) - Effector delivery system (VFC0086)]

VFG002047(gb|WP\_000498818) (*gspD*) general secretion pathway protein D [T2SS (VF0333) - Effector delivery system (VFC0001)] [Enterobacteriaceae]

VFG050111(gb|WP\_050412751) (*cer*) ADP-ribosyltransferase exoenzyme family protein [Certhrax (VF0588) - Effector delivery system (VFC0001)] [Enterobacteriaceae]

VFG000340(gb|WP\_005694039) (*hxA*) heme-hemopexin utilization protein A, two-partner secretion (TPS) pathway [HxA (VF0526) - Effector delivery system (VFC0001)] [Enterobacteriaceae]

VFG043635(gb|WP\_011081077) (VV1\_RS15615) type II secretion system F family protein [Flp pili (VF0612) - Adherence (VFC0001)] [Enterobacteriaceae]

VFG038517(gb|WP\_016350156) (*flpJ*) Flp pilus pseudopilin [Flp type IV pili (VF0476) - Adherence (VFC0001)] [Enterobacteriaceae]

VFG005361(gb|WP\_002352221) (*spaP/pac*) cell surface antigen SpaP [SpaP (VF0526) - Adherence (VFC0001)] [Enterobacteriaceae]

VFG002302(gb|NP\_461708) (*mig-14*) antimicrobial peptide resistance protein Mig-14 [Mig-14 (VF0395) - Antimicrobial resistance (VFC0001)] [Enterobacteriaceae]

VFG049153(gb|WP\_000159201) (*clbG*) colibactin biosynthesis acyltransferase ClbG [Colibactin (VF0573) - Exoenzyme (VFC0001)] [Enterobacteriaceae]

VFG049902(gb|WP\_011310140) (*tssM*) Type VI secretion system protein TssM [T6SS (VF0579) - Effector delivery system (VFC0001)] [Enterobacteriaceae]

VFG002511(gb|WP\_004197255) (*flgE*) flagellar hook protein FlgE [Flagella (VF0430) - Motility (VFC0204)] [Enterobacteriaceae]

VFG038403(gb|WP\_011705726) (*atsS*) Type VI secretion system protein [T6SS (VF0480) - Effector delivery system (VFC0001)] [Enterobacteriaceae]

VFG001240(gb|NP\_249773) (*flgG*) flagellar basal-body rod protein FlgG [Flagella (VF0273) - Motility (VFC0204)] [Enterobacteriaceae]

VFG002346(gb|WP\_005160438) (*flgG*) flagellar basal-body rod protein FlgG [Flagella (VF0394) - Motility (VFC0204)] [Enterobacteriaceae]

VFG038369(gb|WP\_011705706) (*hcp*) hemolysin co-regulated protein [T6SS (VF0480) - Effector delivery system (VFC0001)] [Enterobacteriaceae]

VFG001308(gb|WP\_001291010) (*cap8L*) type 8 capsular polysaccharide synthesis protein Cap8L [Capsule (VF0239) - Invasion (VFC0083)] [Enterobacteriaceae]

VFG000417(gb|WP\_002218234) (*pla*) plasminogen activator protease precursor [Pla (VF0139) - Exoenzyme (VFC0001)] [Enterobacteriaceae]

VFG041338(gb|WP\_010948206) (*ceg32/sidI*) Dot/Icm type IV secretion system effector Ceg32/SidI [Dot/Icm T4SS (VF0224) - Adherence (VFC0001)] [Enterobacteriaceae]

VFG050159(gb|WP\_001331697) (*kpsD*) Polysialic acid transport protein precursor [K1 capsule (VF0239) - Invasion (VFC0083)] [Enterobacteriaceae]

VFG038364(gb|WP\_005320615) (*aexT*) Type III secretion system effector AexT, bifunctional toxin with GTPase activity [AexT (VF0527) - Adherence (VFC0001)] [Enterobacteriaceae]

VFG048600(gb|WP\_004213920) (*iucA*) aerobactin Synthetase IucA [Aerobactin (VF0565) - Nutritional/Metabolic factor (VFC0346)] [Enterobacteriaceae]

VFG001445(gb|AAA92657) (AAA92657) unknown protein [TraJ (VF0241) - Invasion (VFC0083)] [Escherichia coli]

VFG000933(gb|WP\_001007140) (*entB*) isochorismatase [Enterobactin (VF0228) - Nutritional/Metabolic factor (VFC0346)] [Enterobacteriaceae]

VFG001884(gb|WP\_010948340) (*enhB*) enhanced entry protein EnhB [Enh loci (VF0163) - Others (VFC0346)] [Enterobacteriaceae]

VFG005289(gb|WP\_001868236) (GBS\_RS03585) tip adhesin protein [PI-1 (VF0527) - Adherence (VFC0001)] [Enterobacteriaceae]

VFG034895(gb|WP\_001304001) (*espY1*) Type III secretion system effector EspY1 [TTSS secreted effectors (VF0083) - Effector delivery system (VFC0001)] [Enterobacteriaceae]

VFG002219(gb|WP\_011005413) (*cgs*) cyclic beta 1-2 glucan synthetase [CG (VF0366) - Immune modulation (VFC0001)] [Enterobacteriaceae]

VFG038383(gb|WP\_011705715) (*atsH*) Type VI secretion system protein [T6SS (VF0480) - Effector delivery system (VFC0001)] [Enterobacteriaceae]

VFG002457(gb|WP\_011205638) (*bsaU*) Type III secretion system protein BsaU [Bsa T3SS (VF0428) - Effector delivery system (VFC0001)] [Enterobacteriaceae]

VFG050160(gb|WP\_000030755) (*kpsU*) 3-deoxy-manno-octulosonate cytidylyltransferase [K1 capsule (VF0239) - Invasion (VFC0083)] [Enterobacteriaceae]

VFG001444(gb|AAG10151) (*aslA*) putative arylsulfatase [AslA (VF0238) - Invasion (VFC0083)] [Escherichia coli]

VFG038796(gb|WP\_016351321) (*flgE*) flagellar hook protein FlgE [Polar flagella (VF0473) - Motility (VFC0204)] [Enterobacteriaceae]

VFG050301(gb|NP\_218420) (*cpnT*) NAD<sup>+</sup> glycohydrolase [CpnT (VF1197) - Effector delivery system (VFC0001)] [Enterobacteriaceae]

VFG037330(gb|WP\_001177743) (*basD*) acinetobactin biosynthesis protein BasD [Acinetobactin (VF0467) - Nutritional/Metabolic factor (VFC0346)] [Enterobacteriaceae]

VFG040108(gb|WP\_011190503) (*rvhB6e*) VirB6-like protein of the type IV secretion system [Rvh T4SS (VF0428) - Effector delivery system (VFC0001)] [Enterobacteriaceae]

VFG049157(gb|WP\_014907259) (*clbK*) colibactin hybrid non-ribosomal peptide synthetase/type I polyketide synthase [Colibactin (VF0573) - Exoenzyme (VFC0001)] [Enterobacteriaceae]

VFG038764(gb|WP\_017409846) (*flrA*) FleQ protein [Polar flagella (VF0473) - Motility (VFC0204)] [Aeromonas hydrophila]

VFG002287(gb|WP\_011860904) (*toxA*) toxin A [TcdA (VF0376) - Exotoxin (VFC0235)] [Clostridium difficile]

VFG000913(gb|WP\_000237770) (*focF*) F1C minor fimbrial subunit F precursor [F1C fimbriae (VF0224) - Adherence (VFC0001)] [Enterobacteriaceae]

VFG037497(gb|WP\_085947929) (ACICU\_RS04580) TonB-dependent receptor [HemO cluster (VF0636) - Nutritional/Metabolic factor (VFC0346)] [Enterobacteriaceae]

VFG001223(gb|NP\_249086) (*pilT*) twitching motility protein PilT [Type IV pili (VF0082) - Adherence (VFC0001)] [Enterobacteriaceae]

VFG000191(gb|NP\_250387) (*pscO*) type III secretion system protein PscO [TTSS (VF0083) - Effector delivery system (VFC0001)] [Enterobacteriaceae]

VFG000974(gb|WP\_010922711) (*scpA/scpB*) streptococcal C5a peptidase [C5a peptidase (VF0245) - Adherence (VFC0001)] [Enterobacteriaceae]

VFG002529(gb|WP\_011205290) (*tsr*) methyl-accepting chemotaxis protein I [Flagella (VF0430) - Motility (VFC0204)] [Enterobacteriaceae]

VFG002059(gb|NP\_248763) (*tagT*) type six secretion associated protein TagT, ATP-binding component of ABC transporter [TagT (VF0245) - Adherence (VFC0001)] [Enterobacteriaceae]

VFG038816(gb|WP\_011706646) (*cheV*) CheV [Polar flagella (VF0473) - Motility (VFC0204)] [Aeromonas hydrophila]

VFG034929(gb|WP\_001239101) (*lifA/efa1*) lymphostatin Efa1/LifA [Efa-1/LifA (VF0204) - Effector delivery system (VFC0001)] [Enterobacteriaceae]





## Relative abundance

2.1538406532684858e-05  
9.790184787584026e-06  
5.175132004420847e-06  
3.647633364406307e-05  
0.0002954766323328124  
0.0001499358686805686  
3.5171581429734212e-06  
8.164377927552023e-06  
3.1193554288716e-05  
1.999586813379231e-06  
5.222939228480161e-06  
8.208830075977895e-06  
0.00011484345670747979  
7.921305379796533e-06  
6.2487663438137045e-06  
0.0001431349801222728  
8.746259006366502e-06  
0.00020698773735647989  
0.0014570098536816226  
4.349101319099827e-06  
3.762949560618819e-05  
1.732975238262e-05  
5.132071148105696e-05  
0.00012849617533704035  
5.502512617839197e-06  
3.643435857657853e-05  
0.00011232778241383658  
8.598983596699277e-06  
8.588098807336367e-05  
7.248502198499712e-06  
3.89248310831654e-06  
0.00020136934874736182  
0.00014977037655178213  
1.7263608289556567e-05  
0.00036219017277079206  
6.230117592098925e-06  
5.283954873672687e-06  
2.9757009025419866e-05  
1.469481927181228e-06  
0.00012494655723380719  
7.414861265350525e-05  
0.00018117250798902043  
4.9270864617252945e-06

2.925656773521229e-06  
0.00010684406390229495  
2.234716092818093e-06  
6.823590000656625e-05  
0.00010107408652209652  
1.0743623211077957e-05  
2.6399214232668212e-05  
3.3208996856562556e-06  
1.5489949903643218e-05  
7.390629692587942e-06  
1.5716001987018136e-06  
1.7682038201187724e-06  
1.1597603517599539e-05  
1.1223487275096328e-05  
2.236926494492493e-06  
4.568752900872546e-06  
1.7948672110570712e-05  
1.0389889828171103e-05  
0.0003109607443156376  
7.679228135592224e-05  
6.536221635641358e-06  
4.7711660040757596e-06  
0.00019321217624908475  
9.367295148830395e-05  
6.8949167254021656e-06  
3.473936537529816e-06  
1.2371623008380252e-06  
5.2593783393765354e-05  
7.023393434571149e-06  
3.1193554288715997e-06  
6.873959531707934e-06  
6.128814867024147e-06  
4.505045191099422e-06  
9.54869356282362e-05  
3.243857298187336e-05  
7.265968468857542e-05  
2.3076864142162348e-05  
1.0141402179066861e-05  
0.00020295806155799193  
3.3594196029962e-05  
5.701342905710697e-05  
3.093751964339138e-06  
1.4283364332201536e-05  
0.00014749126212599412  
0.00018810479807373164  
1.0642506757326635e-05

6.8949167254021656e-06  
1.1965781407047142e-05  
5.646773248269439e-06  
8.731786432169535e-06  
9.727022305083484e-05  
1.2741029216517801e-05  
0.00029066721041758086  
0.00010221616659579253  
8.076902449756821e-05  
6.06309031080941e-06  
0.00019073167230751047  
3.18974990963598e-06  
4.6153728284324696e-05  
2.684311793390991e-05  
4.456222041245143e-06  
3.168522151918613e-05  
3.298068500317369e-05  
5.570277551556429e-06  
2.3076864142162348e-05  
2.9796214570907905e-06  
1.1809570161524335e-05  
5.668001719127593e-06  
0.0001943504651972735  
0.00018607547415895462  
3.5023736286556125e-05  
4.624811218674663e-06  
0.00018301420579795805  
8.620191852206831e-05  
3.3670461825288984e-05  
3.115058796049463e-05  
7.283519117333044e-06  
0.00027227297693037736  
8.851399944938982e-06  
0.00011040026425407252  
0.00015756580188869864  
0.00022547002608988833  
4.434377815552764e-06  
7.134172510826213e-07  
9.156002777052266e-06  
5.120451364374136e-05  
0.00019559201608059762  
5.9987604401376925e-06  
0.0001138355378824787  
8.737739922918743e-05  
0.0004380043541923462  
1.4781259385175884e-05

5.791730049337819e-05  
0.00017565302415005127  
0.00018183177374326916  
0.00015714577575961911  
1.4497004396999424e-05  
6.06309031080941e-06  
2.8682853577673008e-05  
6.435255610375354e-05  
8.137448944882434e-05  
4.111877610785291e-06  
5.597853182999777e-05  
2.6859058027694893e-06  
4.6822622897140995e-06  
1.1345481701999548e-05  
9.706148866660557e-06  
9.1436631506681e-06  
3.268110817820679e-06  
8.4741271604006e-05  
0.0003130719200925777  
4.541230293035964e-06  
6.717423819599733e-05  
0.0001455441827579942  
1.5870404813557264e-05  
1.1085944538881913e-05  
2.5846087839221827e-05  
2.11853179010015e-05  
0.0001851360561525064  
0.0004189692027722463  
1.3623690879107892e-05  
9.265763660115565e-05  
4.947856996969494e-05  
4.399869038778035e-06  
2.1215128385852814e-05  
1.3832004195302203e-05  
4.741158670716792e-06  
4.863511152541742e-05  
8.598983596699277e-06  
6.370514608258901e-06  
0.00017068171214580454  
7.271809279523827e-06  
4.195793480393154e-06  
4.916375404199804e-05  
0.00026923008165856074  
5.904785080762168e-06  
4.111877610785291e-06  
3.960652689898266e-06

8.233735507033653e-05  
3.641759558666522e-06  
0.0001211535367463523  
8.314458404161434e-06  
3.1439286644095136e-06  
1.3148445848441339e-05  
1.5926286520647255e-05  
1.2494655723380719e-05  
8.698202638199654e-05  
7.66621249468444e-06  
1.2055078283219138e-06  
0.00021218655841878965  
2.6976533032985007e-05  
0.00011122291898025789  
3.023439419695067e-06  
8.895589990049873e-05  
0.0001343242956007074  
1.3381850212614853e-05  
0.0003543415268280412  
0.00015433031452553717  
5.0256281909598e-06  
5.1165897871762665e-06  
6.905443315822627e-05  
9.48894833258144e-06  
3.89248310831654e-06  
1.4046786869142299e-05  
1.7263608289556567e-05  
5.398884396123924e-05  
0.00010408727843201259  
9.367295148830395e-05  
7.651802320822251e-05  
6.574222924220669e-06  
0.00019009984896239246  
7.02339343457115e-05  
6.3259655550542946e-06  
4.643804283227742e-06  
2.2570186486346407e-06  
2.1892862400115294e-06  
6.0307538291517596e-06  
3.7074306326752624e-05  
1.229093851049951e-05  
1.0567909747345374e-05  
4.045675645674257e-06  
9.79997497237161e-05  
1.7396405276399308e-05  
0.00014482721634046715

1.7450097885277085e-06  
0.000125640704773995  
7.69228804738745e-06  
4.263545227576552e-05  
2.217188907776382e-06  
5.556591365926069e-06  
6.586988405626922e-05  
8.174214527464735e-06  
9.633493244457681e-05  
0.0002105710135877011  
3.01136176555514e-06  
8.879201750812367e-07  
1.5705088096749374e-05  
0.00011043577871854337  
1.3303133446658295e-05  
3.775513665996511e-06  
2.2325100552141265e-06  
7.053513250469895e-05  
1.5596777144358e-05  
2.9105954773898458e-06  
2.718188324437392e-06  
0.00015507652703533096  
0.00015019666794614204  
5.682242929477161e-06  
0.00020559388053926456  
4.941440683026752e-06  
7.68678372678109e-05  
5.2350293655831245e-05  
0.00010023413566457219  
0.00012335632832355872  
1.3248580468259578e-06  
0.00010279694026963228  
1.7351913191293427e-05  
1.1934209424442799e-05  
1.7948672110570712e-05  
0.00010475764485243179  
1.018708417086446e-05  
5.5159333803217325e-05  
5.014484891201574e-06  
5.906988358777377e-05  
6.593389754903527e-06  
2.98880971709063e-06  
9.14777266219649e-05  
6.443113065333077e-06  
6.195979961457287e-05  
9.678456573175078e-06

3.01537691457588e-05  
0.00013213449400950486  
1.838644460107244e-05  
0.00021380035896415115  
0.00013355507987786871  
4.01693194659309e-06  
5.91861171249398e-05  
1.0872753297749567e-05  
2.2751837886638933e-06  
2.9665166404971042e-05  
2.6144886542565432e-05  
2.5862508479526294e-05  
1.932933919599923e-06  
0.00020758029484399174  
6.78459805779573e-05  
2.38810209707699e-06  
0.00011183403391970984  
3.3956947236214867e-06  
3.6683417452261318e-06  
9.234514846598245e-07  
4.523065371863821e-05  
5.843753710418372e-06  
0.00015456518357088593  
6.057676837317615e-05  
3.3553897417387386e-05  
4.2075026715012275e-05  
1.4829722530701051e-05  
1.4977037655178211e-05  
3.4792810552798615e-05  
1.5229176336241818e-05  
6.926593218780735e-06  
2.0559388053926453e-05  
1.638791801399935e-05  
8.757144960046118e-06  
0.00010384588863973056  
0.00017668224108843047  
9.479478324265491e-05  
2.194952461273287e-06  
0.0001568693192553926  
5.52941977000467e-06  
0.00013988861974836557  
1.229093851049951e-05  
0.0002221148173683126  
0.00014560552909424627  
1.2634260815262065e-05  
5.632709055870262e-05

0.00038710919849284945  
0.00015656764748759377  
7.156749006113639e-06  
2.2570186486346404e-05  
1.2029429180488884e-06  
0.00017038944894007542  
0.0001496602512749058  
6.409201943936587e-05  
2.0222348905501432e-05  
1.2224501005037351e-05  
3.047887716889367e-06  
3.753581221463751e-05  
7.067289643537219e-06  
8.54320971877343e-05  
4.662953991612186e-05  
1.598256315146226e-06  
6.894916725402165e-05  
2.5875660022104234e-06  
6.112250502518677e-05  
1.4003298364903465e-05  
0.0002869618513871306  
0.00011043577871854337  
9.613802915904881e-05  
7.866200646719687e-06  
3.697328641850534e-05  
2.596478399462583e-06  
2.8269158574148875e-05  
3.967601203389316e-05  
6.046878839390134e-06  
7.771589986020309e-06  
8.50200257869139e-06  
8.273900070482598e-05  
8.314458404161434e-06  
8.843982570683447e-05  
6.67118786410593e-06  
2.535350544766715e-05  
1.5814913887635735e-05  
1.8893339063758645e-06  
0.00011934743154739059  
5.479484481332822e-05  
3.506252226251023e-06  
6.923059242648704e-06  
0.0001556100471971498  
0.00012098734533792111  
7.744974951821609e-06  
4.723828064609734e-05



7.21765750829333e-05  
0.0001339065406143894  
1.3034770524103227e-05  
6.67118786410593e-06  
5.982890703523571e-06  
0.00016674895380143116  
0.00018301420579795805  
3.2078477814637025e-05  
5.9318890122804204e-05  
8.314458404161434e-06  
3.106500942214162e-06  
1.4975384742954926e-06  
0.0002423070734927046  
3.5790823911879885e-05  
4.5005625590684775e-06  
2.458187702099902e-05  
6.842761530807595e-06  
0.0001518535136836774  
1.0073642253594252e-05  
1.4404666789375223e-05  
0.00025646246953867015  
0.0001669321139000707  
1.029529295568396e-05  
5.566849688447778e-05  
4.736194106663686e-05  
8.076902449756821e-05  
1.334237572821186e-05  
0.00043000973605747584  
0.0003104661291588894  
2.7379330338158714e-06  
1.595437520939619e-05  
6.588587577369002e-06  
0.0001130766342965955  
5.384601633171214e-05  
4.168723845035779e-06  
1.9247086688782215e-05  
9.19322230053622e-06  
0.00048007974561010714  
8.04815902466872e-06  
2.108655185018098e-05  
0.00016276182209358443  
5.68939040486015e-06  
5.359082194151446e-06  
2.067214520961527e-06  
3.995640787865565e-06  
8.498452681998827e-05

3.3257833616645734e-05  
2.1335214018225568e-05  
0.0002299863748405332  
4.532129631126073e-06  
5.09736893899003e-06  
0.00010878258489292731  
0.000127154448205007  
3.0376530368460843e-06  
8.66487619131e-06  
4.0565608716267444e-05  
1.059265895050075e-05  
5.951401805083973e-06  
1.0059385178023054e-05  
0.00010690881788041757  
3.549490762673401e-05  
1.2178420495056058e-06  
0.0002276217963113286  
2.567006453952225e-06  
8.41065874933355e-05  
7.935202406778632e-06  
3.4580010488255507e-06  
0.00015641724628923874  
3.4615296213243515e-05  
1.1450798409781823e-05  
8.470159872404157e-06  
1.7504122956129332e-06  
4.691976526829689e-06  
8.989355864582906e-05  
0.00021324625822683024  
1.1538432071081174e-05  
9.565395046237687e-05  
1.0735123509170459e-05  
0.00012367756876190133  
2.701950640300968e-06  
3.691867724235861e-05  
4.249226340999413e-05  
3.2618259893248705e-05  
0.000376922114321985  
1.1195706365999553e-05  
3.023439419695067e-06  
2.2660648155630363e-05  
1.6752093969866e-05  
7.5384422864397e-05  
4.1118776107852906e-05  
6.17905105445877e-06  
1.7737511262211057e-05

3.042420653720058e-05  
4.587287395399412e-06  
0.00011902803610167947  
9.423052858049625e-06  
5.056272265294921e-05  
1.4404666789375223e-05  
4.7913828091777755e-06  
0.00013245419201770407  
1.4829722530701051e-05  
3.83310624734222e-06  
3.13014904627254e-05  
3.9331003233598434e-05  
3.8695426185146745e-05  
0.000125640704773995  
0.0001098720333246272  
6.40056420546767e-05  
4.496088838830835e-06  
2.4058858360977764e-05  
5.904785080762168e-06  
7.718541590211297e-06  
0.00015295390146399392  
0.00021047110763234927  
3.960652689898266e-06  
4.164885241126906e-06  
6.750843838602716e-06  
4.1118776107852906e-05  
0.00026189039547583033  
9.082460586071927e-06  
0.0001323237209853777  
6.162214403084224e-06  
3.89248310831654e-06  
4.948649203352101e-06  
1.9057859712909353e-05  
2.243584013821339e-06  
0.00028566728664403075  
1.7383033712005458e-06  
6.162214403084224e-06  
3.1366611455366296e-06  
1.2224501005037351e-05  
4.6356453298750717e-05  
9.502238176184495e-06  
7.446600875640138e-07  
1.2599067888200055e-05  
9.156002777052266e-06  
0.00011999969353924422  
4.01693194659309e-06

9.832750808399608e-05  
7.33073804191867e-05  
7.78496621663308e-06  
0.00023670194209981314  
6.0307538291517596e-06  
1.8238166822031534e-05  
1.8047836044883258e-05  
0.00016547800140965195  
5.1692175678443654e-05  
0.00017343042070029987  
0.00014096274194155538  
1.011871447844255e-05  
0.00013303133446658294  
2.405885836097777e-06  
5.308762173549085e-06  
1.4742716335931616e-06  
4.7312399287278456e-05  
3.6126720222554474e-06  
1.174822174510083e-05  
7.225344044510895e-06  
8.868755631105529e-06  
0.00027621773263290507  
0.00031222652753537566  
1.018708417086446e-05  
1.547228747501877e-05  
6.730752041464019e-05  
0.00014977037655178213  
7.82537261568135e-06  
0.00016226243486506978  
0.00011555276497462314  
4.332438095655e-06  
0.00018483680606174263  
4.59661115026811e-06  
2.0748006292953302e-05  
2.2706151465179817e-05  
9.502238176184495e-06  
8.598983596699277e-06  
4.895092393792013e-06  
0.00011251406397671194  
2.9701179740193943e-05  
4.8461414698540924e-05  
1.541078491265356e-05  
6.34371019896749e-06  
0.00010028969782403148  
1.3303133446658295e-05  
0.00012400048669600552

2.833474826921651e-05  
8.892002696979986e-06  
0.00017263608289556565  
2.999380220068846e-05  
3.775513665996511e-06  
2.9888097170906303e-05  
1.8128518524504292e-05  
6.046878839390134e-06  
0.0004117636543013281  
0.000566772319324459  
8.470159872404157e-06  
1.5596777144358e-05  
2.555404164894813e-05  
7.633865606521215e-05  
2.1745506595499134e-05  
6.916002097651101e-06  
5.308762173549085e-06  
6.406608175444505e-06  
5.951401805083973e-06  
1.7877728742544745e-05  
6.452304382116719e-06  
3.246995959701235e-06  
2.5128140954798998e-05  
1.3623690879107892e-05  
7.66621249468444e-06  
9.522242888134357e-06  
1.2777020824474066e-05  
5.611743637548164e-05  
2.0748006292953302e-05  
3.744259413794553e-06  
4.873992857611874e-05  
6.50800772930046e-06  
8.345139062479374e-06  
0.00020737237431555576  
3.942699940606538e-06  
4.691976526829689e-06  
1.2564070477399499e-05  
0.00011140555103112858  
7.640313128148346e-06  
1.3461504082928035e-05  
0.0001932933919599923  
7.318876006252135e-06  
5.489157004689102e-06  
8.342060811257506e-07  
1.018708417086446e-05  
7.014679546935205e-07

0.00028269158574148874  
1.7197967193398554e-05  
0.0001687710959650679  
1.334237572821186e-05  
1.3381850212614853e-05  
4.8304581641264095e-06  
0.000452306537186382  
6.61722128413812e-05  
6.586988405626922e-05  
7.342638590688019e-06  
0.00012190417823796542  
1.0794905422109356e-05  
0.00010318780316039133  
2.2540192883042296e-05  
2.065326653819096e-06  
0.0001627001932325115  
6.574222924220669e-06  
1.0350264008841694e-05  
0.00039499372254290203  
0.00010380805771490735  
3.4792810552798615e-05  
1.650753785351759e-05  
1.4590533457625226e-05  
5.967104712221399e-06  
8.66487619131e-06  
3.4792810552798615e-05  
5.139847013481613e-06  
8.631804144778283e-06  
1.3891478414815172e-06  
4.981349528484383e-06  
4.7711660040757596e-06  
0.00018238166822031533  
0.00015359355478226087  
4.662953991612186e-05  
4.096979503499837e-06  
7.702768003855278e-05  
2.5128140954798998e-05  
0.00024405028984876727  
1.7504122956129332e-06  
3.692298262745975e-05  
1.2494655723380719e-05  
1.8048944021802955e-06  
0.00011415649301429831  
2.9888097170906303e-05  
4.259006941491356e-06  
1.627001932325115e-05

3.775513665996511e-06  
9.423052858049625e-05  
8.889672507593986e-06  
0.0001070125876623932  
1.2634260815262065e-05  
9.082460586071927e-06  
2.1416029222840057e-06  
1.4286371989462474e-06  
1.3874433656023988e-05  
7.5384422864397e-05  
0.0001382047752513945  
0.00011765198944154443  
7.156749006113639e-06  
0.0003957682200380843  
8.956565092799643e-06  
0.00010600934465305828  
9.616487960707535e-05  
0.00023076864142162348  
0.0002870216537944218  
3.776626292813602e-05  
0.00013862284414643933  
1.3664850066053837e-05  
0.00017030806566562545  
1.1140555103112858e-05  
9.070318259085201e-06  
1.6927639864759803e-06  
6.230117592098925e-06  
7.580556489157241e-05  
2.1201868930611657e-05  
0.00013761862186198234  
6.0307538291517596e-06  
6.771055945903921e-06  
8.92710270762596e-05  
2.037416834172892e-05  
0.0001837495307319677  
4.7611214440671785e-05  
0.00015132932470919843  
2.0559388053926456e-06  
0.0004644898782553754  
3.097989980728644e-06  
1.7016799743656206e-06  
4.315902072389141e-05  
0.00023912263166663567  
0.00017421221831715142  
0.00010769203266342428  
8.14402352274649e-05

8.202450156229726e-05  
0.00015137434310119878  
8.368838682880562e-05  
1.3706258702617638e-05  
2.3395165716537002e-05  
0.00010126265757904075  
7.2784960007004e-05  
0.00021322023777719707  
6.821328287033603e-05  
0.0001018708417086446  
8.019619453659256e-06  
4.634288290844078e-06  
0.00021788853120274215  
9.100735154655573e-06  
7.366555980234235e-06  
0.00011437636572529199  
0.0001130766342965955  
6.443113065333077e-06  
4.1496012585906605e-05  
1.1364485858954323e-05  
8.931803656919075e-05  
4.5050451910994226e-05  
6.340745848407224e-05  
3.5897344221141435e-06  
4.492516261287068e-07  
0.00026328290970550596  
2.629689169688267e-06  
6.55516720559974e-05  
3.519895231022428e-05  
9.268576581688156e-06  
0.00018428988688177537  
4.634288290844078e-06  
4.9450423161776455e-06  
0.00017526878315972302  
2.4852007537713297e-05  
7.390629692587942e-06  
3.9262720241873435e-06  
0.0004344187080321183  
3.41363424291609e-06  
0.0002389543970041263  
2.599462857393e-06  
0.00014366879578770982  
0.0002206373352128693  
2.7692236970594818e-05  
2.8626996024454557e-05  
5.951401805083973e-06



9.283795919260714e-07  
1.3221471417316048e-06  
0.00014781259385175882  
1.7668224108843046e-05  
0.00018603867853424455  
9.230745656864939e-05  
1.2874000109669319e-05  
1.1085944538881913e-05  
1.2224501005037351e-05  
1.6039238907318513e-05  
7.744974951821609e-06  
1.2453373821210957e-06  
6.593389754903527e-06  
3.2171434415258995e-05  
1.297246282561325e-05  
2.8357776626105456e-05  
3.132316739517881e-06  
0.00023530397888308887  
2.8809333578750448e-06  
1.3874433656023988e-05  
8.646242048963098e-05  
5.771893165951511e-05  
2.6296891696882677e-05  
2.640435126598844e-06  
3.263394929194676e-05  
2.0606220372955902e-05  
2.7247381758215784e-05  
9.177234087839635e-05  
2.8093573738284597e-05  
4.7411586707167926e-05  
1.1538432071081174e-05  
1.4313498012227279e-05  
6.230117592098925e-06  
0.00025128140954799  
0.00013960078308221667  
0.000165569780667228  
0.000250745628290958  
5.3846016331712146e-06  
2.6763700425229705e-05  
2.9370554362752077e-06  
8.711605107595956e-06  
6.162214403084224e-06  
6.632060662556921e-06  
9.894205500952107e-05  
0.00010318780316039133  
3.2307609799027284e-06

0.00013741952084655703  
4.365893216084768e-06  
0.0002817397622204736  
2.4824727617254775e-06  
1.3542111891807843e-05  
0.0002537879572741545  
2.684311793390991e-05  
2.754607412828149e-06  
1.1195706365999553e-05  
4.149601258590661e-06  
2.3242884747501644e-06  
1.0518756678753069e-05  
6.419197580156077e-05  
9.706148866660557e-06  
3.7566988138403823e-06  
1.0925278675999565e-05  
0.0001646052271406137  
7.594699318428055e-05  
1.1288848681856456e-05  
6.555167205599738e-06  
7.798388572179e-05  
1.445068808902179e-05  
0.00032157806353282184  
0.0002870406870605886  
1.0233179574352533e-05  
0.0001869035277629678  
2.4635432308626473e-06  
1.1934209424442799e-05  
1.3664850066053837e-05  
2.2391412731999107e-05  
1.2923043919610914e-05  
7.295266728812614e-05  
5.139847013481613e-06  
0.00015319222556829242  
2.2391412731999107e-05  
5.951401805083973e-06  
1.4134579287074437e-05  
5.4302338504014786e-05  
2.3956914045888877e-06  
0.00017112487682867568  
0.00021538406532684855  
1.6752093969866e-05  
1.0378764047415833e-06  
2.764709885002335e-06  
0.00013662501000472738  
0.00017029613598884864

6.417516134880561e-05  
0.0001499690110034423  
2.7635837302630264e-05  
0.00030926942713598775  
0.00010470058731166249  
0.000245226435823942  
0.0001078387520539739  
6.791389447242973e-06  
0.00010816025889239569  
0.0001947541328834158  
3.5708410830503844e-05  
3.390603727034348e-06  
0.00013326889042098754  
0.0002769223697059481  
1.0898952703286313e-05  
4.90571081547052e-06  
7.798388572179e-06  
4.417056027210762e-05  
5.128192031591633e-06  
2.0132338450432434e-05  
5.308762173549085e-06  
3.472602972640169e-05  
9.962699056968765e-06  
4.157229202080717e-06  
6.334825450789664e-06  
1.3542111891807843e-05  
5.874110872550415e-05  
0.00014848446927835773  
4.605972883771711e-06  
7.49679343402843e-05  
7.744974951821609e-06  
2.0748006292953302e-05  
1.825288689210581e-05  
7.744974951821609e-06  
0.00017948672110570712  
8.149667336691567e-05  
8.65067147624228e-05  
0.0001347296068214755  
8.125267135084707e-05  
2.0282804358133722e-05  
0.0003025584883657969  
1.0599284387194742e-05  
0.00010509459943235463  
9.300872049763387e-06  
5.8221421281773925e-06  
1.1205869939473958e-05

7.815858865347383e-06  
4.119987618942806e-05  
1.63173193855498e-05  
8.768498902133832e-05  
9.029972863847947e-05  
5.283335602232456e-05  
0.00012380528518819814  
8.131909988864163e-05  
3.0370194448206972e-05  
3.957817893516334e-05  
6.0248563885106946e-05  
0.00022909778542924537  
0.00027094977399870924  
0.0001297796099966984  
2.505285400609666e-05  
6.470171860704964e-06  
1.1482558086127637e-05  
0.00030481849574854795  
0.000239654371834394  
2.8508420075903098e-05  
0.0001240116273301785  
1.5764189914853195e-05  
0.00010164887486080203  
0.00010268478696129429  
0.00014001312763084668  
2.8618067845425803e-05  
0.00022069865880794477  
1.4822106852212565e-05  
2.929408519610515e-06  
7.647171263937009e-06  
0.00016635706105267844  
3.6474008038287786e-06  
0.00018735569596645666  
5.068595122486859e-05  
1.1394636508132784e-05  
2.8472057295194035e-05  
8.017993146347746e-06  
8.943146201695562e-05  
0.0002745295566851279  
8.439354600919519e-05  
3.531976727758248e-05  
1.3305968597658634e-06  
1.2039963818463929e-05  
2.0329774972160407e-05  
0.0001494115991929861  
9.029972863847947e-06

6.643480035545275e-05  
5.658325201376964e-05  
7.455608857525761e-06  
0.00014670145188901238  
0.00023349469580995948  
3.016499043166504e-05  
3.26346387710996e-05  
0.00011851526711609854  
2.554015208173012e-05  
4.343813869394988e-05  
0.0002944160936615748  
5.314784028436221e-05  
0.00013704624827745655  
5.455056920682338e-06  
2.204651152536506e-06  
5.813045031102115e-05  
2.8184460756858746e-05  
4.3009812946882704e-05  
1.6910676454115246e-05  
1.746642638453218e-05  
4.392383494575388e-06  
0.00015522316745230955  
2.3546511518388317e-05  
7.202998683263029e-06  
7.086378704581627e-05  
0.000276967618383296  
0.00011841959108452055  
3.41316405495904e-05  
9.97412552253446e-06  
9.804726026104887e-05  
1.625789724649099e-05  
5.1492717230523936e-05  
1.4971222615313297e-05  
0.00015732818392634582  
5.262162404392297e-06  
1.0996104886419766e-05  
8.304350044431594e-05  
4.434265577956322e-06  
6.098932491648122e-05  
9.563878714409651e-06  
0.00018601744099526772  
1.252642700304833e-05  
5.145710677600767e-06  
1.9427408981229006e-05  
0.00010752453236720676  
6.069084534919011e-06

0.00012319035827501173  
0.00021392005714455787  
3.7924045055100456e-06  
3.4987606456790164e-05  
2.4761057037639632e-05  
6.608079609068125e-06  
7.915635787032669e-06  
6.065786119410904e-05  
4.413225171892473e-06  
9.16342073868314e-06  
8.379164008795843e-06  
4.650436024881693e-06  
8.719567546653174e-05  
7.072906501721205e-05  
7.500703265938215e-06  
1.6758328017591687e-05  
2.5024767846897e-05  
1.0279573069045418e-05  
0.0001194607419235664  
5.138603342410711e-05  
1.0814967499724869e-05  
7.898829766253406e-06  
1.4309033922712902e-05  
5.813045031102116e-06  
0.00020910625685650704  
4.237299339299947e-05  
6.098932491648122e-05  
3.2016771255639877e-06  
8.436165124501937e-06  
0.00014704936047056736  
4.886011583365381e-05  
0.00015011933834705812  
5.776939161343718e-06  
1.0721466339784882e-05  
2.8618067845425803e-05  
0.000191075317034414  
1.0127991342755047e-05  
2.1884404822972672e-05  
1.0137190244973717e-05  
3.3217400177726376e-05  
7.561684593303566e-06  
5.813045031102115e-05  
0.0002559453733595821  
6.889534851676582e-05  
3.5097630376465605e-06  
4.3009812946882704e-05

6.403354251127975e-06  
1.5062140971276737e-05  
3.623716383024696e-05  
4.368315639810592e-05  
0.0001471324392052965  
4.1568143239165963e-05  
2.610771101687968e-05  
1.3008212657011729e-05  
8.087714825881205e-06  
1.4589603215315114e-05  
6.538398629007653e-06  
2.4475979078324696e-05  
1.0109643532351506e-05  
0.0001395130807464508  
0.00010543498679893717  
1.3334583583890158e-05  
0.00018244780993139265  
6.149336892405544e-05  
7.915635787032669e-06  
0.0001982631032551443  
1.062956805687244e-05  
7.140784683119682e-06  
2.670745742932774e-06  
3.041157073492115e-05  
2.0109993621110022e-05  
1.0277206684821422e-05  
3.729673002411382e-05  
7.342793723497409e-05  
4.7544393864605173e-05  
2.4968784026210432e-05  
8.493947077409484e-06  
5.741279043063819e-06  
0.00017246650158501644  
5.8639473518648315e-05  
5.697318254066392e-06  
2.7355506028715842e-05  
3.0432301185319875e-05  
2.9179206430630236e-06  
0.00010375474796548798  
9.144991512616512e-05  
3.444767425838291e-05  
1.6995654727754016e-06  
3.617843260847994e-05  
6.000562612750572e-05  
2.156723953568321e-05  
6.425472918662098e-06

2.016449224880951e-05  
0.0001316937635364727  
3.253949405165033e-05  
3.6604505383684165e-05  
5.152837700699936e-06  
6.1595179137505865e-06  
7.832313305063903e-06  
3.0382595507597833e-06  
0.0001171763407844206  
0.00019354415826097217  
2.247944906287223e-05  
0.00011273784302743498  
9.18604646890211e-05  
0.00024940885943499583  
8.964695951579167e-06  
7.470579959649306e-06  
0.0004119417378441915  
7.846078354809182e-05  
6.049347674642852e-06  
5.615620860234497e-06  
0.0001060791924209266  
6.200581366508924e-05  
1.0334302277514872e-05  
5.586109339197229e-06  
1.1172218678394458e-05  
6.200581366508924e-05  
1.8192414767263345e-05  
1.3099819788399134e-05  
0.0005376226618360339  
4.5676474154761865e-06  
4.271353409765045e-06  
1.4199804656127308e-05  
3.3441337707014426e-05  
0.00011686959643681741  
1.8417568415373042e-05  
1.55663130539973e-05  
7.848837172796106e-05  
0.00014540924844243998  
3.665368295473256e-05  
2.2013898342635233e-05  
5.314784028436221e-05  
1.6758328017591687e-05  
1.1412112944494952e-05  
0.0001630431753743382  
3.188870417061732e-05  
4.644630237085337e-06



6.538398629007653e-05  
0.00013779069703353164  
4.482347975789583e-05  
8.379164008795843e-06  
0.0002443814912611709  
5.612595202443422e-05  
2.3007723066823462e-06  
6.631637825143235e-06  
2.5943855089995493e-06  
3.623716383024696e-05  
0.00017548815188232804  
0.00017715946761454068  
0.00010871149149074087  
2.4692580663088636e-05  
3.916156652531952e-06  
9.359368100390827e-06  
9.790391631329878e-05  
1.4989318371899092e-05  
8.879114128652398e-06  
8.943146201695563e-06  
1.3310729230430606e-05  
1.6534883644023795e-05  
5.4711012057431685e-05  
6.764270581646098e-05  
1.1273784302743499e-05  
0.00015735614344010562  
1.2940343721409928e-05  
0.00020413436597560244  
1.1924194935594084e-05  
9.300872049763386e-05  
1.7239799906883013e-06  
3.1577034736851e-05  
7.750726708136155e-05  
5.694411459038807e-05  
9.074021511964278e-06  
6.598162982096809e-05  
6.80551613397321e-05  
2.0219287064703013e-05  
0.0001328696007109055  
3.951812100051211e-05  
9.790391631329879e-06  
2.4002250451002285e-05  
6.319063813002725e-05  
4.3820363014197345e-06  
7.006306628823643e-06  
2.0441477032447004e-05

9.008108522773254e-06  
6.498425886297562e-05  
5.227656421412676e-05  
7.750726708136156e-06  
1.1342526889955349e-05  
8.753761929189069e-06  
4.5370107559821395e-05  
0.00013599186286860303  
8.131909988864163e-05  
1.1773255759194158e-05  
1.2484392013105216e-05  
0.000182264927776343  
9.442509695191254e-06  
8.672141771341151e-06  
9.743770718799737e-05  
2.9133506812101443e-06  
0.00010062767287224682  
0.00013881898581736396  
1.3334583583890158e-05  
1.8417568415373042e-05  
1.978908946758167e-06  
7.485611307656648e-06  
9.074021511964278e-06  
3.257748528813796e-06  
0.00010629568056872442  
2.3501887681019293e-06  
9.947456737714852e-06  
5.131515613662558e-05  
0.0002406195754167642  
3.1435140007649805e-06  
5.5198053707794565e-06  
1.019273649289138e-05  
0.00041736120657563083  
3.3516656035183374e-05  
9.418604607355327e-05  
3.5772584806782254e-06  
7.396319721481817e-06  
2.8952130894205093e-06  
0.00020109993621110026  
0.00010131055787941964  
0.00016608700088863187  
5.955734503583812e-05  
4.709302303677663e-05  
8.249110465422071e-06  
2.5637932143298765e-05  
3.6783109801324124e-05

5.511627881341265e-06  
1.5631717730694766e-05  
4.0838077057138905e-06  
0.00012740920616114226  
8.183785349549833e-07  
7.644552369668536e-05  
1.1138768921872316e-05  
0.00017611118674108186  
5.254729971617731e-06  
4.520472442169325e-06  
1.0660025271935113e-05  
8.39176425542561e-05  
7.390442629927204e-07  
0.0002179173973550772  
1.0100494533679696e-05  
1.0248894820675907e-05  
0.00012737285546038303  
1.8555355710251145e-05  
5.2178805328265845e-06  
0.00018858911068644652  
4.5370107559821395e-05  
9.34761010026471e-06  
1.1308051124332384e-05  
4.359783773326587e-05  
0.00026693085703356805  
2.565757806831279e-05  
7.006306628823643e-06  
8.134873512912582e-06  
1.5247331229120305e-05  
2.5081003280260818e-05  
0.00015031712403658  
5.636892151371749e-05  
5.586109339197229e-06  
5.615620860234497e-05  
8.087714825881205e-05  
5.645445857216016e-06  
1.1518107801564562e-05  
3.1662543148130675e-05  
6.0889506054097445e-06  
2.9065225155510576e-05  
1.3334583583890158e-05  
7.865430908890813e-06  
0.00017715946761454068  
1.5185097224103486e-05  
8.964695951579167e-05  
0.00019879726518578228

7.209978333149911e-06  
1.0137190244973717e-05  
3.692653915538813e-05  
3.899736708496179e-05  
6.341503670293219e-05  
2.672664382115915e-06  
6.436589653815492e-06  
7.799473416992356e-06  
0.00011123966571145578  
4.650436024881693e-05  
0.0003699794406535711  
7.811756052294707e-05  
8.087714825881205e-05  
1.0305675401399873e-05  
0.00031395348691184424  
1.7715946761454068e-05  
4.4555075687489265e-05  
2.00789836078161e-05  
5.365887721017338e-05  
0.0002686918592153867  
6.948019867395399e-05  
5.813045031102116e-06  
9.39482025228625e-06  
3.6108205951847502e-06  
5.782925626795888e-05  
3.6835136830746083e-05  
0.00012197864983296244  
1.3479524709802008e-05  
6.8388765071789606e-06  
1.4822106852212565e-05  
1.3779069703353164e-05  
9.383669130325077e-05  
3.659359494988873e-05  
1.4518434419142846e-05  
2.330072329794585e-05  
6.462144352192923e-05  
5.425508695695309e-05  
0.00020796980980837383  
1.5437132032802302e-05  
3.8354111545416024e-05  
9.947456737714852e-06  
0.00016627257295666385  
0.00016288742644068977  
1.1172218678394458e-05  
2.7599026853897284e-05  
6.625278720379397e-05

0.00025725816307856173  
2.2277537843744632e-05  
2.0554413369642844e-05  
5.1791398884993326e-05  
4.359783773326587e-05  
1.3933890711256008e-05  
0.0001528105360466654  
0.00024088589481401575  
0.0001361103226794642  
2.2685053779910698e-05  
0.00021567239535683213  
7.5770851729233284e-06  
1.062956805687244e-05  
0.0002700253175737757  
0.00011217132120317652  
4.073374620334329e-05  
7.1821405789678646e-06  
5.692841453122338e-05  
7.427779761963814e-05  
2.4968784026210432e-05  
2.8662163481551267e-06  
1.2611351931882557e-05  
2.7763797163472793e-05  
4.203783977294186e-06  
1.9177055772708012e-05  
4.5095137210973995e-05  
6.239578733593885e-05  
1.3192726311721116e-05  
5.113881539388803e-05  
1.4807358487185489e-05  
6.915146505400288e-05  
9.86456126490056e-05  
0.00015205785367460576  
7.381644483939194e-06  
9.418604607355327e-05  
2.4236800129676578e-05  
2.7763797163472793e-05  
2.7951531329116105e-06  
1.0539231784434431e-05  
1.252642700304833e-05  
5.353019884755905e-05  
9.074021511964278e-06  
3.679870247186305e-05  
6.447744921846367e-06  
1.0277206684821422e-05  
3.611989145539179e-05

1.0509459943235462e-05  
0.0002511627895294754  
3.2749549470997836e-06  
8.601962589376541e-05  
1.0000937687917619e-05  
0.000159236719918128  
2.2277537843744632e-05  
8.230860221029544e-06  
5.714821535952925e-06  
3.8420125506767856e-05  
4.1707946411494996e-05  
0.00220928277260486  
7.592548612051743e-05  
5.924122324690055e-06  
1.4392065067332126e-05  
8.138263043542962e-05  
0.0002783303356537672  
9.490685765064679e-06  
7.15451696135645e-05  
3.5230575946073433e-06  
2.1884404822972672e-05  
4.50269146130754e-05  
2.6061988230510367e-05  
1.0509459943235462e-05  
2.7888671813383464e-06  
4.5186422913830215e-05  
1.4226955334246096e-05  
8.000750150334096e-06  
6.403354251127975e-06  
3.074668446202772e-05  
8.542706819530091e-05  
5.91201855603575e-05  
5.138603342410711e-06  
0.00014661473181893023  
3.9161566525319515e-05  
4.088295406489401e-05  
0.0001594435208530866  
4.342819634130764e-05  
4.7696779742376344e-06  
4.30928434738072e-05  
0.0003993594778429477  
1.6758328017591687e-05  
1.8237004019143896e-05  
1.3933890711256008e-05  
3.949414883126703e-06  
8.013058996719225e-05

4.9341496285216896e-05  
9.026321439317478e-06  
7.11718904677546e-05  
5.09636824644569e-06  
0.00020879508683142292  
2.1756425847399732e-05  
8.436165124501937e-06  
4.576074809231678e-06  
8.601962589376541e-05  
7.252141949133244e-06  
0.00023321589617317147  
0.00014734054732298433  
1.5592409136233672e-06  
7.631484758780215e-05  
0.0002212846881728092  
6.005405681848837e-06  
0.00022855385241739377  
0.00032268331601219914  
1.9831283688194854e-06  
0.00017754376147053753  
6.098932491648122e-06  
1.3677753014357921e-05  
8.607490842968686e-05  
1.4589603215315114e-05  
5.9644870860206085e-05  
5.813045031102115e-05  
5.905315587151355e-05  
6.492755357600967e-06  
4.110882673928569e-05  
1.5062140971276737e-05  
0.00013660028064447306  
1.500140653187643e-05  
2.506973598318972e-06  
9.983046922822953e-05  
0.00011081890101845736  
6.470171860704964e-06  
1.252642700304833e-05  
0.00022894454276340643  
4.5095137210973995e-05  
1.098528194853943e-05  
3.2071972585390986e-05  
4.2228703971683935e-06  
5.170741931765606e-06  
0.00028388203846667364  
1.625789724649099e-05  
2.823794170706151e-05

1.0450418033442008e-05  
0.00026959049419604015  
2.113834556764406e-05  
6.174852813120921e-05  
0.00017029765724918875  
4.982610026658956e-05  
1.978908946758167e-05  
1.2421865842755774e-05  
2.969153088511855e-06  
4.4027796685270465e-05  
0.00012892297890761129  
3.0063424807316e-05  
2.138131505692732e-05  
9.539355948475269e-06  
5.180101392238031e-06  
5.1671511387574363e-05  
8.341589282298999e-05  
1.2962887874234684e-05  
3.676234011764184e-06  
1.3677753014357921e-05  
6.7642705816460995e-06  
8.267441822011898e-06  
6.555680739921328e-05  
2.2685053779910698e-05  
5.2032850628046915e-06  
4.916760554940997e-05  
8.230860221029544e-06  
1.6559416112338375e-05  
5.580523229858031e-05  
0.00018081224014267555  
9.096207383631673e-06  
2.929408519610515e-05  
4.088295406489401e-05  
9.816223799222571e-06  
2.6959049419604016e-05  
0.0001355093941025129  
4.122270160559949e-05  
3.2164399019354646e-05  
1.3830293010800574e-05  
0.00012947849721248333  
4.650436024881693e-05  
0.00019009081561560204  
0.0002202838117049223  
9.726402143543411e-05  
1.4971222615313297e-05  
1.3239675515677417e-05



0.000191075317034414  
0.00015270088439910034  
6.403354251127975e-06  
5.586109339197228e-05  
8.221765347857137e-05  
3.875363354068077e-05  
1.1239724531436116e-05  
3.885481796245801e-05  
5.082443743040102e-06  
0.0002872328133015163  
4.665014194238689e-05  
5.628364326634425e-06  
0.0001311661442915349  
4.227669113528811e-06  
8.815992464230698e-06  
0.0004340406956556247  
7.4036792435927445e-06  
3.683513683074608e-06  
6.000562612750571e-06  
4.133720911005949e-05  
3.7731732453401155e-05  
1.3334583583890158e-05  
8.493947077409484e-06  
0.00016940292349831737  
2.2144933451817585e-05  
4.162180263233185e-05  
4.8722996705963476e-05  
1.5697674345592213e-05  
1.594435208530866e-05  
6.593023225148729e-05  
3.382135290823049e-05  
2.7763797163472793e-05  
3.000281306375286e-05  
3.289109958658958e-05  
6.515497057627592e-06  
5.594509503617074e-05  
2.5222703863765114e-05  
7.086378704581627e-05  
3.3546878448199764e-06  
3.957817893516334e-05  
2.5835755693787182e-05  
7.019526075293121e-05  
7.80882810774737e-05  
6.0248563885106946e-05  
1.1205869939473958e-05  
0.000286180678454258

2.2277537843744632e-05  
1.70658202747952e-05  
0.00033387745819663434  
2.6637342385957194e-05  
7.507430354069102e-05  
2.4422421137234275e-05  
2.619963957679827e-05  
5.113881539388803e-05  
3.3729363734409375e-06  
0.00025414147536355363  
3.298181577930279e-06  
0.00026755933293839875  
2.9694916464466905e-05  
0.0001361103226794642  
3.4769615139302375e-05  
5.1244474103379534e-05  
3.4769615139302375e-05  
7.099902328063652e-05  
5.322387439063454e-06  
1.069065752846366e-05  
2.486864184428713e-06  
8.105335119619508e-06  
1.1626090062204232e-05  
5.0049535693794e-05  
2.1504906473441352e-05  
0.00010846498017216777  
7.946376120186194e-05  
3.000281306375286e-05  
1.9376816770340386e-05  
6.515497057627592e-06  
8.32292800873681e-06  
5.9908998710231144e-06  
4.5370107559821395e-05  
5.353019884755905e-06  
8.087714825881205e-05  
1.3677753014357921e-05  
2.352169959898011e-05  
9.790391631329878e-05  
1.2039963818463929e-05  
9.254599054490932e-06  
1.0783619767841606e-05  
3.947319702817352e-05  
4.4555075687489265e-05  
1.7507523858378138e-05  
0.00013684041636433488  
1.0248894820675907e-05

4.697410126143125e-06  
2.5024767846897e-05  
0.00010969087429696377  
5.041123062202377e-05  
2.1756425847399732e-05  
4.389792117882424e-05  
0.00024002250451002287  
5.936726840274502e-05  
3.2294694617233977e-06  
1.149438358364167e-05  
8.836933063908204e-06  
5.797946212839514e-05  
1.9177055772708012e-05  
7.4258459479148795e-06  
0.00013026431442245639  
6.190264259409908e-06  
2.0219287064703013e-05  
1.712473564973696e-05  
4.133720911005949e-05  
9.842192645252259e-06  
1.5533815531963902e-05  
5.561059521532667e-06  
1.9356653589517972e-06  
2.1756425847399732e-05  
0.00014956176160423537  
8.55252602277093e-06  
4.251827222748976e-05  
4.504054261386627e-06  
3.1961759621180017e-06  
9.713704490614503e-06  
4.143311910799467e-05  
2.9087950116539126e-06  
4.420677146854392e-05  
2.5308495373505815e-05  
2.113834556764406e-05  
3.059497384790587e-06  
8.964695951579167e-06  
3.603243409109302e-05  
4.276263011385464e-05  
9.300872049763386e-05  
7.500703265938215e-05  
5.1033591493900604e-06  
6.93232699361246e-05  
1.0752453236720676e-05  
6.0889506054097445e-06  
2.8662163481551267e-06

1.3544959295771919e-05  
5.000468843958809e-05  
3.126343546138953e-05  
6.132443109734101e-05  
7.038497767388508e-05  
8.954887750319235e-05  
2.315569804920345e-05  
3.5097630376465606e-05  
4.960465093207139e-05  
9.51495861868377e-06  
8.417078778066413e-06  
6.098932491648122e-05  
5.538980873308219e-05  
5.05678480375485e-06  
1.0248894820675907e-05  
5.849605062744268e-06  
2.3546511518388317e-05  
1.414581300344241e-05  
0.0001643527591122847  
8.304350044431594e-06  
2.868426229688014e-06  
2.384838987118817e-05  
0.00013479524709802008  
0.000256271058853338  
3.767441842942131e-05  
1.1736116151120991e-05  
1.3479524709802008e-05  
5.020713657092246e-06  
5.552759432694559e-05  
2.638545262344223e-05  
1.1172218678394458e-05  
0.00014584403784375944  
1.2697436245410764e-05  
0.00016498220930844142  
0.00010783619767841606  
2.2182659062468038e-05  
3.7579281009145e-05  
6.118994769581174e-06  
8.857973380727034e-05  
9.902069102409688e-05  
1.7144464607858774e-05  
3.9161566525319515e-05  
5.813045031102115e-05  
2.2411739878947916e-05  
0.00012148077779282789  
0.0002920935023892634

0.0001285341242961543  
0.00012568746013193763  
8.513384027243373e-06  
3.735289979824652e-05  
1.184824464938011e-05  
0.0002583575569378718  
3.991045842249214e-05  
4.574199368736092e-05  
0.0001162609006220423  
1.0897331048346086e-05  
5.293179215312496e-05  
2.958527888592727e-05  
7.099902328063654e-06  
7.223978291078358e-05  
9.231634788847033e-06  
1.305385550843984e-05  
1.8417568415373042e-05  
5.569384460936158e-06  
0.00016643665773260794  
1.3856047746388656e-05  
5.034301515433497e-06  
3.409927805855097e-05  
2.898973106419757e-05  
9.051943600742954e-06  
0.00010137190244973717  
4.16975583800102e-05  
1.0363088634833856e-05  
7.670822309083205e-06  
6.0248563885106946e-05  
1.777944477852021e-05  
1.297796099966984e-05  
1.2568746013193766e-05  
5.2584435617036805e-06  
0.0002618427321927522  
1.1518107801564562e-05  
2.1884404822972672e-05  
3.4157836558495767e-06  
8.923011117929085e-06  
3.0431078379064503e-06  
2.686008448764367e-05  
2.2438259177743883e-06  
1.5427330577518416e-05  
3.7403741098246245e-06  
3.5097177063854396e-05  
0.0001554640057862007  
4.368943202969427e-06

5.722365825628434e-06  
1.2998954468094221e-05  
1.607504293000965e-05  
0.00017250235403872794  
1.9992062884474023e-05  
2.749126140771885e-06  
1.4133091435109152e-05  
1.847219845466021e-05  
2.884699484700361e-06  
2.0524664949622452e-05  
8.774294265963599e-06  
7.23653135337204e-06  
3.524402717709228e-05  
8.737886405938854e-06  
5.64061774240517e-05  
8.225900874340873e-06  
9.236099227330104e-06  
4.679623608513919e-06  
5.1995817872376886e-05  
1.583331296113732e-05  
3.9484324196836196e-05  
1.671294145897828e-05  
1.2411575386038882e-05  
1.007574461163284e-05  
4.442680640994228e-06  
7.058650135747254e-05  
2.7928788114472993e-06  
2.9701419235983973e-06  
1.8122466642265606e-06  
2.3555152391848586e-06  
4.897280520537823e-05  
1.8835694309760857e-05  
6.83711241503657e-05  
8.774294265963599e-06  
5.706858059163316e-06  
2.162043761633741e-06  
4.262815027998509e-06  
8.35647072948914e-06  
3.6058743558754516e-06  
4.780546251603323e-06  
1.4276817788686533e-05  
6.420215316558732e-06  
9.999195744687862e-06  
7.114292648078594e-06  
6.362026053870887e-06  
1.320269983593269e-05

5.238384636396179e-06  
2.2889463302513735e-05  
8.037521465004825e-06  
8.006960546886933e-06  
5.109172560852237e-06  
3.202784218754773e-05  
1.1291317017862003e-05  
4.818834379476576e-06  
2.9701419235983973e-06  
0.00015824160757113543  
1.0546731004163257e-05  
1.2460536235687951e-05  
1.331119231246058e-05  
1.052915311915632e-05  
4.1803089306824095e-05  
8.792612208063732e-06  
4.228575549861975e-06  
2.2989417290734325e-06  
1.8886373307903712e-05  
2.8715872143153593e-05  
2.5219528429116928e-05  
3.161907843590486e-06  
5.585757622894599e-06  
1.012418569149646e-05  
3.871012176160411e-06  
4.916336086765597e-06  
2.074709974217994e-06  
4.430872851915173e-05  
1.320269983593269e-05  
3.545169400389333e-06  
0.00014192301107788117  
6.506170825431298e-06  
1.7213874309247386e-05  
1.0424904078372593e-05  
1.853724140696535e-06  
5.737958103082462e-06  
4.1782353647445706e-05  
9.302866209696344e-05  
8.491252515448644e-06  
6.103856880670329e-06  
9.132428725798848e-05  
1.1852705199800733e-05  
4.319652561705157e-05  
5.982473363157e-06  
8.099348553197169e-06  
8.339923262698074e-06

5.225386163353012e-06  
4.8689725406503204e-05  
8.554936909314509e-05  
1.5621888900825398e-05  
1.6355966010339911e-06  
7.090338800778666e-06  
8.644624892574975e-07  
7.704258379870477e-05  
2.573316444600322e-05  
4.721593326975927e-05  
2.074709974217994e-05  
5.931917250228911e-06  
1.949843170214133e-05  
2.1079385623936574e-06  
3.899686340428266e-05  
1.2724052107741774e-05  
1.3161441398945398e-05  
1.7607279463472103e-06  
0.00010027764875386969  
3.8287829524204793e-05  
1.4164779980927782e-05  
6.749457127664307e-05  
2.537145329917185e-05  
2.303972236139238e-06  
3.330839299557359e-05  
6.30052890904636e-05  
3.539211132489519e-05  
1.8311570642010988e-05  
4.26281502799851e-05  
1.2033317850464364e-05  
6.6429988133478345e-06  
4.378026244971442e-06  
0.0001286003434400772  
2.7830360667373533e-05  
5.02584874422736e-06  
5.948674078619388e-06  
1.8526369124615224e-05  
1.7085846846501127e-05  
8.389763441558819e-06  
2.2331183709769502e-06  
1.6490451243784368e-06  
9.111767122346814e-05  
6.653493282247279e-05  
2.6455158590845025e-06  
2.965958625114456e-05  
8.423322495325055e-06



1.2919206281173398e-05  
3.471149379941644e-05  
8.006960546886933e-06  
0.00015870027889742857  
2.590197569288147e-06  
8.25815930914221e-06  
2.105830623831264e-05  
0.00010529153119156318  
4.018760732502412e-06  
9.97775108548479e-05  
1.8153712274407445e-05  
1.163442333608433e-05  
4.2866781146692394e-05  
9.076856137203722e-06  
6.323815687180972e-06  
1.1141960972652189e-05  
5.0138824376934855e-06  
5.1361722532469854e-05  
1.0911039501716393e-05  
8.491252515448644e-06  
5.031853342488085e-06  
1.5893061311934065e-06  
1.1764416892912088e-05  
1.126112633064847e-05  
6.139447882889982e-05  
8.630453376357638e-06  
1.367422483007314e-05  
1.3854148840995155e-05  
7.186068894379683e-05  
0.0001008110405025605  
8.630453376357638e-06  
8.162134200896371e-06  
1.4623823776605998e-05  
1.8311570642010988e-05  
1.1570497933138812e-05  
0.00020550877172329198  
2.5576890167991057e-05  
1.707252766436322e-05  
7.1384088943432664e-06  
1.0744033795057468e-05  
5.801186291546181e-06  
2.8152815826621175e-06  
5.291031718169004e-05  
6.519599454585955e-06  
1.7237358448823443e-05  
1.886945003433032e-05

1.0424904078372593e-05  
9.557476356268973e-06  
3.767138861952171e-06  
4.840989939841986e-06  
2.528007951778228e-06  
3.452181350543055e-05  
4.818834379476576e-06  
5.864189985606415e-07  
8.328143710067146e-05  
5.801186291546181e-06  
4.835936714435053e-05  
2.5636198898815386e-05  
3.244731315610576e-06  
1.5656733262685977e-05  
4.653769334433732e-05  
7.520823656540227e-05  
1.649475684463131e-05  
1.7815825920738274e-06  
1.3112270385001643e-05  
1.163442333608433e-06  
1.7260906752715275e-05  
2.960002884903383e-05  
5.585757622894599e-06  
1.8418343648669944e-05  
1.0854797030058062e-05  
2.4344862703251602e-05  
1.0744033795057468e-05  
1.9589122082151288e-05  
1.8564478023784282e-06  
3.4241148354979894e-06  
6.814985837641629e-06  
3.5155770013877524e-06  
3.290360349736349e-05  
5.174031016784432e-06  
1.2314798969773472e-05  
2.8886565484653822e-06  
4.4240139156118984e-05  
4.721593326975928e-06  
5.413446333756462e-06  
1.389987210449679e-05  
5.1867749355449853e-05  
0.00023491337636364696  
2.36610182452951e-05  
1.2534706094233712e-05  
0.00020504140284672827  
8.595227036045974e-06

3.452181350543055e-05  
1.1444731651256867e-05  
3.311054439986264e-06  
2.770829768199031e-05  
2.2343030491578395e-05  
8.595227036045974e-06  
1.923132989800241e-05  
9.37313334049524e-06  
7.574930301551308e-06  
5.753635584238426e-06  
2.55252196828032e-05  
4.700514785337642e-05  
2.5219528429116928e-05  
1.4777758763728168e-05  
0.00015549382243479796  
4.753567999619106e-06  
7.114292648078594e-06  
5.660835010299096e-06  
4.7859786905256e-05  
7.090338800778666e-06  
1.4276817788686533e-05  
1.4228585296157188e-05  
3.2497386170235553e-06  
1.4633986267069239e-06  
1.3718766279031035e-05  
3.1987300615158435e-05  
9.215888944556953e-06  
5.737958103082462e-06  
2.8152815826621175e-06  
0.00012169372951788709  
3.1197490723426126e-06  
2.9045939639051914e-05  
6.664020961491341e-06  
1.1083319072796124e-05  
0.00011344542081245866  
9.54303908080633e-05  
5.331216769193073e-05  
1.482979312557228e-05  
5.167682512469359e-05  
2.9534791358082244e-06  
3.115134058921988e-06  
1.4871685196548472e-05  
2.596585232837563e-06  
4.137191795346294e-06  
8.896622829874371e-07  
1.5535452776328025e-06

3.452181350543055e-05  
3.1954941181051047e-06  
4.049674276598584e-05  
1.9558798363757867e-05  
8.5084065609344e-05  
7.3373889332099784e-06  
1.1507271168476852e-05  
2.1882548914076175e-06  
2.8807532473751898e-06  
0.00015177157649234332  
4.09694673897133e-06  
2.558724937826566e-06  
0.00012262869094599725  
7.946530655967032e-06  
3.294036730015385e-05  
1.6594409959269218e-06  
3.0083294626160914e-05  
5.753635584238426e-06  
4.811212321582852e-05  
1.0322699136427764e-05  
0.00019798407574481968  
2.384859143636765e-06  
9.119738922103899e-05  
2.409417189738288e-06  
5.0019729782215285e-06  
1.1602372583092362e-05  
3.9087343365777516e-05  
2.36610182452951e-05  
3.977680067236832e-05  
1.3473004631038156e-06  
0.00011818437174563214  
2.1709594060116124e-05  
3.0169493178098333e-06  
7.069934948114554e-05  
9.970788938595e-07  
5.691434118462875e-06  
6.286061563675413e-06  
3.3965010061794575e-06  
1.2033317850464364e-05  
4.280143544372487e-05  
5.5783592684271884e-05  
1.3328041922982682e-05  
9.762128719747581e-05  
8.525630055997018e-06  
1.2172431351625801e-05  
1.9680660035806204e-05

6.3813049207008e-06  
6.972179529294548e-07  
1.1083319072796124e-05  
1.6124277364711056e-06  
2.84187668533234e-06  
3.0431078379064503e-06  
3.7806653928748003e-06  
7.697553194161277e-05  
6.580720699472699e-06  
3.1073550635421596e-05  
6.211889745814937e-06  
5.48155476919201e-05  
1.9717515204412582e-06  
9.871081049209048e-05  
9.744203400761632e-05  
6.393413658690744e-05  
0.00010424904078372592  
2.363446266926222e-06  
0.00041290796545711053  
9.704288589084164e-06  
3.720548805355589e-06  
0.00012087849502354686  
8.217875605195174e-06  
6.664020961491341e-06  
2.580674784106941e-06  
4.203254738186155e-06  
0.00020265315626828064  
7.946530655967032e-06  
3.023446696096574e-06  
6.642998813347835e-07  
1.3272041746835695e-05  
1.5041647313080457e-05  
9.09646057810481e-06  
9.380091865618101e-06  
6.016658925232182e-06  
4.8689725406503204e-05  
7.674309853612477e-06  
0.0001293507754196108  
4.518949836547776e-05  
4.1129504371704374e-05  
2.502237764402377e-05  
4.245626257724322e-06  
5.737958103082462e-06  
7.3373889332099784e-06  
2.071308810325833e-05  
4.288860741000537e-06

1.0222478756462446e-05  
1.568588919054945e-05  
4.931687643632936e-06  
6.193619481856658e-06  
6.998228659257977e-05  
2.9452176557080615e-06  
1.2609764214558464e-05  
9.863375287265872e-06  
9.550252262273306e-06  
1.8311570642010988e-05  
2.6191923181980894e-06  
8.147558961251913e-05  
1.9543671682888758e-05  
7.657565904840959e-06  
2.699782851065723e-06  
1.7016813121868798e-05  
8.235091825038462e-05  
6.656998810846988e-06  
2.240245344501344e-05  
3.865682650447479e-06  
5.049953534367539e-06  
2.243917877852986e-05  
3.490327000825299e-05  
1.4015511639475967e-05  
2.770829768199031e-05  
7.828366631342988e-05  
3.8287829524204795e-06  
3.814910550418956e-06  
2.0863579496346736e-06  
8.037521465004825e-06  
2.0849808156745185e-05  
2.834226949974783e-06  
3.3693289981300217e-06  
1.8206028448108908e-05  
2.868979051541231e-05  
6.671057942443284e-06  
5.990036540607261e-05  
2.1935735664908998e-05  
2.5432737002793036e-05  
6.121600650672279e-06  
5.774672643047341e-06  
6.086215675812901e-05  
3.3320104807456706e-05  
3.767138861952171e-06  
2.876817792119213e-05  
5.154130897489106e-05

1.7937228482378737e-06  
1.2534706094233712e-05  
1.1645146306900998e-05  
8.906836475419242e-05  
5.956592446777285e-05  
7.744736094650883e-05  
5.737958103082462e-06  
0.00011980655627924039  
1.680822618793483e-05  
1.4325378393409958e-05  
2.2889463302513735e-06  
3.87814111202811e-06  
7.799372680856532e-06  
7.168785102404302e-05  
2.699782851065723e-06  
6.96782191708874e-05  
4.3270492270505416e-05  
4.714546172756561e-05  
0.00011699059021284799  
5.06209284574823e-06  
1.6236165179886381e-06  
6.809900027315032e-05  
0.00016886377643929946  
1.5041647313080457e-05  
8.713781891715574e-06  
2.4581680433827982e-05  
4.43332762911845e-06  
5.982473363157e-06  
0.0001414363851826968  
2.0645398272855528e-05  
1.0635508201168e-05  
1.874626668099048e-05  
3.995883536681715e-06  
7.491097080822676e-05  
1.3808725402172221e-05  
5.225386163353012e-06  
4.802350339409952e-06  
7.574930301551308e-05  
1.2314798969773472e-05  
8.45715109972395e-06  
3.8659957456945444e-05  
1.2172431351625801e-05  
6.10385688067033e-05  
4.15351207856265e-06  
1.0689495552442963e-05  
8.136903492392828e-05

2.425140833586868e-05  
1.179737044163173e-05  
2.409417189738288e-05  
0.00012022908405957042  
2.6656083845965365e-05  
6.221065358438002e-06  
6.687535502639863e-05  
0.0001588609067100778  
0.00013055666324556628  
1.3313997621693975e-05  
1.1321670020598191e-05  
0.00013280012943080042  
2.849996333004718e-05  
5.086547400558607e-05  
5.221067662391563e-05  
3.4864745427669928e-06  
0.00024568023944698076  
1.0744033795057468e-05  
3.3532334774383177e-06  
0.00027785265175551396  
1.5973430774952697e-05  
2.916662913893717e-06  
9.429092345513122e-05  
2.537145329917185e-05  
2.0385582031280383e-06  
1.9928996440043504e-05  
1.649475684463131e-05  
4.4709779699177565e-05  
0.00018543502477645624  
2.724231078695037e-06  
2.248217747862559e-05  
2.8304175051495477e-05  
1.2724052107741775e-06  
0.00011122344844179211  
2.9005931457730904e-05  
8.441093217889033e-05  
2.0379006037076745e-05  
4.2399274305327454e-05  
1.8635669237444813e-05  
5.596892023471797e-05  
2.0055529750773942e-05  
1.1083319072796124e-05  
1.2998954468094221e-05  
3.8387537413590744e-05  
2.6224540770003287e-06  
6.193619481856658e-06



3.3479024226252207e-06  
0.0001014858131966874  
4.6796236085139194e-05  
5.221067662391563e-05  
2.3014542336953704e-05  
3.012633224365184e-06  
1.4463122416423514e-05  
4.859609131918301e-05  
7.976631150876e-06  
7.742024352320822e-06  
3.6879695688813728e-06  
1.193105169309498e-05  
3.0387166289051424e-06  
9.089916361861571e-05  
2.0849808156745185e-05  
3.178612262386813e-06  
5.865823464711041e-06  
8.737886405938854e-06  
3.4102520223988073e-05  
8.525630055997018e-06  
3.6686944666049892e-06  
6.615174734548473e-05  
1.3244217759945056e-05  
6.267353047116857e-05  
2.484755898325975e-05  
3.557146324039297e-06  
3.798091305507289e-05  
5.865823464711041e-06  
7.019435412770879e-05  
3.87814111202811e-06  
0.00016491444644461703  
1.293507754196108e-06  
3.3639466834365237e-06  
1.9202102952868666e-05  
9.338495005903608e-06  
1.4522969819525957e-05  
4.45207320048893e-06  
5.157136221627585e-05  
4.356890945857787e-05  
3.662314128402198e-06  
6.155599601962186e-07  
8.774294265963599e-05  
1.9319547007626274e-05  
2.2027516985682674e-06  
1.4934968963342297e-05  
0.00010817623067626353

8.81100679427307e-06  
1.712057417748995e-05  
4.460155632925521e-05  
4.840989939841986e-06  
4.15351207856265e-06  
2.5576890167991057e-05  
8.722375364981565e-05  
5.0271818606051394e-05  
0.00015004689948674852  
6.666502905983516e-05  
2.448640260268911e-06  
7.2740263344775955e-06  
8.733859730175749e-05  
0.00011751286963344106  
4.721593326975928e-06  
3.3965010061794575e-05  
2.740777384596005e-05  
1.6679846525396148e-05  
1.6968820498237419e-06  
3.662314128402198e-06  
1.4934968963342297e-05  
1.0744033795057468e-05  
0.00012446282047429776  
2.3559206634945292e-05  
3.539211132489519e-05  
1.2685726649585926e-05  
2.699782851065723e-06  
6.622108879972528e-06  
1.4228585296157188e-06  
5.706858059163316e-06  
8.258159309142211e-05  
4.6452146113924936e-05  
4.558074943357714e-06  
1.5259642201675824e-05  
7.919363029792786e-05  
4.742861765385729e-06  
3.914183315671494e-06  
3.3965010061794575e-06  
1.4038870825541758e-05  
9.968428988550361e-06  
5.1222907066165883e-05  
1.2647631374361944e-05  
1.8122466642265606e-06  
2.0017401367217333e-05  
5.331216769193073e-06  
1.8566488098744322e-05

3.446531299232837e-06  
4.7589392628955106e-05  
4.220101450563655e-06  
1.5095560027464256e-05  
4.908696092846769e-06  
6.70799288592439e-05  
2.3891109184471386e-05  
7.606612519542587e-05  
1.163442333608433e-05  
3.152441053639616e-06  
9.460155542817898e-07  
9.476237807240688e-05  
7.363044139270153e-05  
6.211889745814937e-06  
4.940365099897393e-05  
1.7976602886364447e-05  
4.742861765385729e-06  
5.982473363157e-06  
1.3992230058679493e-05  
3.1197490723426126e-06  
1.247899628937045e-06  
2.55252196828032e-05  
3.5097177063854396e-05  
0.00011599914453307809  
2.082918520110053e-06  
2.044495751292489e-05  
0.0001295895768511547  
1.183050912264755e-05  
8.290671747367179e-06  
6.390988236210209e-06  
1.27626098414016e-05  
1.2879698005084182e-05  
0.00010450772326706024  
3.9484324196836196e-05  
8.365628505631048e-05  
0.0002537145329917185  
0.00011674114332540055  
5.0019729782215285e-06  
1.5315131809681918e-05  
9.53583678716044e-05  
6.074511414897877e-05  
6.139447882889981e-06  
5.136172253246985e-06  
1.2919206281173398e-05  
3.655955944151499e-05  
1.2998954468094221e-05

8.496146609117491e-05  
8.941955939835515e-06  
1.358600402471783e-05  
8.913568778121751e-05  
1.2387238963713316e-05  
0.00023794696314477555  
7.363044139270153e-06  
3.713986990884063e-06  
0.0001332086666488148  
5.02584874422736e-06  
1.6198697106394338e-05  
1.367422483007314e-05  
7.828366631342988e-06  
1.7190454072091948e-05  
2.118541875081754e-06  
1.6936975526793004e-05  
4.026444787440274e-06  
0.00015259642201675822  
4.480490689002689e-06  
1.330278347334974e-06  
5.707672161596863e-05  
4.935540524604524e-05  
1.1201226722506722e-06  
6.059944241241046e-06  
6.951285554394463e-05  
1.29271370400937e-06  
5.277770987045773e-06  
0.00022821809716397928  
4.775126131136653e-06  
4.438518879269643e-05  
0.00010662433538386146  
7.062236848214604e-05  
9.5719573810512e-05  
2.0385582031280383e-06  
5.111239378231223e-06  
3.9503316175766854e-05  
3.15716735207086e-06  
1.3854148840995155e-05  
8.693796153431824e-05  
2.8846994847003613e-05  
6.967181551137349e-06  
1.1083319072796124e-05  
6.286061563675415e-05  
2.5119251974130378e-05  
7.185248847718224e-05  
0.00010754241903176287

2.621365921781656e-05  
8.595227036045975e-05  
5.331216769193073e-06  
0.00018875792706610767  
1.80913283834301e-06  
1.7403558874638543e-05  
2.909275556755142e-06  
6.211889745814937e-06  
2.431675085255501e-06  
7.554549323161485e-05  
4.9355405246045245e-06  
2.5009864891107642e-06  
3.205221649667068e-06  
3.3910316003724053e-06  
1.3498914255328614e-05  
6.793002012358915e-05  
9.19576691629373e-06  
8.774294265963599e-06  
4.17823536474457e-06  
7.195321038147826e-06  
6.643910061470379e-05  
1.058206343633801e-05  
5.4982522815437694e-05  
0.00012172431351625801  
1.6451801748681746e-05  
1.4732956789864252e-05  
6.749457127664307e-06  
5.915254561323775e-06  
8.454064548227702e-05  
5.0138824376934855e-06  
1.5315131809681918e-05  
2.334623751475902e-05  
3.0083294626160914e-05  
3.5813445983524895e-06  
4.461505558964542e-06  
1.3079693315722136e-05  
0.00010234522914054743  
3.5097177063854396e-05  
2.0808603002285217e-06  
1.0222478756462446e-05  
6.531732704191265e-07  
2.8602113736248065e-05  
6.601349917966344e-05  
0.00010470981002475895  
8.491252515448644e-06  
1.6982505030897288e-05

9.900473078661325e-07  
2.2643340041196382e-05  
3.295509583460506e-06  
1.7190454072091948e-05  
2.838046662845369e-06  
2.2283921945304378e-05  
1.4934968963342297e-05  
4.897280520537822e-06  
3.947198920021113e-06  
4.933131768858012e-05  
1.6261240338465356e-05  
1.4573222310250962e-05  
3.2397394212788676e-05  
2.3984403460492755e-06  
3.857663858311583e-05  
8.449320404261244e-05  
1.1141960972652189e-05  
0.00016719260151401338  
6.63834522398647e-05  
6.016658925232183e-05  
4.344051385113609e-05  
0.00010486548039689278  
7.380806979054895e-05  
5.1186104897117984e-05  
1.3989485530654133e-05  
6.366229647283185e-06  
1.5688208773662135e-05  
2.780188896598353e-05  
6.642185166268243e-06  
9.661360241844716e-06  
3.7017121825494925e-05  
3.8308416772895905e-06  
8.195332941465295e-06  
4.2346064813226845e-05  
1.34470360917104e-05  
2.895012163856809e-05  
3.440755971247048e-05  
7.5639578015871e-05  
1.2819158920113028e-05  
3.6810322262224e-05  
9.306564526748722e-06  
6.655603722159693e-05  
1.4773649517798423e-05  
2.989586063946505e-06  
1.9942638271604406e-06  
6.216082721639713e-06

4.8544064476459455e-06  
6.935839668355891e-05  
5.41565563145597e-05  
7.256660445967066e-06  
2.8303469437019315e-06  
2.0818476097750697e-05  
1.8151646514980982e-05  
2.6568740665072972e-05  
6.347830139632078e-06  
4.207152254626486e-05  
1.0981746141563494e-05  
1.2339040608498308e-05  
5.699868239565828e-06  
8.90411849315959e-05  
1.497510837485931e-05  
1.2919701343015876e-05  
1.0627496266029186e-05  
2.9547299035596846e-05  
7.897831129206622e-05  
1.9436718834625654e-06  
6.157988490596352e-05  
4.888017570428854e-06  
4.597010012747509e-05  
5.4097271633317705e-06  
9.834399529758352e-06  
5.531849735489073e-05  
1.4952453142824728e-05  
1.9080253913913407e-05  
8.928248895580076e-06  
5.6077001573941246e-05  
7.321164094375662e-06  
5.348252991021182e-06  
6.279884157199066e-05  
5.084141732205322e-06  
1.0981746141563494e-05  
2.553894451526394e-06  
5.481736842710563e-06  
4.620650550447473e-06  
5.2818017514533845e-05  
1.5688208773662135e-05  
1.3338153208376712e-05  
8.295563632116307e-05  
1.3959846790123086e-05  
6.177232204629467e-05  
5.167880537206351e-06  
9.834399529758353e-05

6.863591338477184e-05  
3.853244260197717e-05  
3.7940773617685774e-05  
5.490873070781747e-05  
1.8076948381174477e-05  
1.3125592997884653e-05  
3.577116007023939e-06  
1.71888200476646e-05  
1.0392819692331382e-05  
7.751820805809525e-06  
7.009625196742656e-06  
1.0199764218170427e-05  
4.9766221185333054e-05  
4.42217965432087e-05  
5.650984292399739e-06  
1.984652917150029e-05  
1.3900944482991764e-05  
1.984652917150029e-05  
3.2683768278462776e-06  
1.1399736479131656e-05  
6.753050335954125e-05  
6.216082721639713e-05  
3.636339781974667e-06  
3.9740938992389e-06  
2.2160474276697632e-05  
1.8934045071661198e-05  
0.00012127081628720422  
5.7697440323450936e-06  
2.1674498963612157e-05  
5.8830782901232997e-05  
5.5839387160492344e-05  
6.307320693942019e-06  
6.792832664884636e-06  
3.4679198341779454e-05  
4.287883525990085e-05  
2.8158323439906392e-06  
9.776035140857708e-06  
1.96492475693979e-05  
2.9814695406959716e-06  
2.2825800294242825e-05  
7.586074637264255e-05  
3.1556741786101994e-06  
2.1674498963612157e-05  
2.5887490904430073e-05  
2.0047812428817735e-05  
4.464124447790038e-06



5.893602580445524e-06  
3.125734195890937e-05  
1.766500719822546e-05  
1.9154208386447956e-05  
4.823607382824375e-06  
5.739588575730049e-06  
1.7856497791160153e-05  
2.5342491095915757e-05  
4.8807760629171085e-06  
1.634999425542952e-05  
7.487554187429655e-06  
7.938611668600115e-05  
1.0425708362243824e-05  
3.336226675918023e-05  
5.904164592238438e-05  
6.026568004516552e-05  
2.6568740665072972e-05  
2.132377891565727e-05  
0.00012902834892176428  
3.998208546685738e-06  
9.503434160968409e-05  
0.00010385539258221168  
1.8405161131112e-05  
1.1321387774807726e-05  
4.22374851598596e-06  
1.3392373343370115e-05  
0.0002625118599576931  
2.538153961840561e-06  
3.875910402904762e-05  
3.792912551771872e-06  
5.893602580445524e-06  
9.190731749377172e-05  
1.3502146895364952e-05  
1.2292999412197941e-05  
3.969305834300058e-05  
0.0001231969108764059  
7.614461885521684e-06  
2.316009731085447e-05  
0.00014890503242797956  
4.067313385764257e-06  
1.2432165443279426e-05  
9.21545130760573e-06  
1.4707695725308249e-05  
1.7114409571267783e-05  
4.809523857619049e-05  
4.1078850903604096e-05

7.43419869440759e-05  
1.2495033536545063e-05  
1.757079382650159e-05  
1.0295387007715775e-05  
8.256951986137965e-06  
0.00017339599170889726  
1.2112220009077383e-05  
7.938611668600116e-06  
1.7712493776715312e-05  
1.8988610043049268e-05  
7.617396167558493e-05  
6.397133674697181e-07  
7.844104386831068e-06  
5.918306303836614e-05  
1.1340873812285878e-05  
6.364999695651174e-05  
1.3557711285880856e-05  
7.844104386831068e-06  
8.114590744997655e-06  
0.0002196349228312699  
6.02289550725603e-06  
4.144055147759809e-06  
6.93583966835589e-06  
3.845747676033909e-05  
6.135053710370667e-06  
6.444983351205273e-05  
4.4400590868855095e-06  
6.397133674697181e-05  
5.537014861292518e-05  
1.5915574118207964e-05  
8.90411849315959e-06  
1.2339040608498308e-05  
3.013284002258276e-05  
7.573618028664479e-06  
4.467150972839387e-05  
4.173805543668558e-06  
4.8025128898965715e-06  
3.294523842469049e-05  
7.564922715198733e-05  
2.970715818276869e-06  
2.022421020545763e-06  
2.1674498963612157e-05  
1.5915574118207964e-05  
3.808698083779246e-05  
1.204579101451206e-05  
1.8002862527153268e-05

1.3502146895364952e-05  
1.904349041889623e-05  
3.3278018610798465e-05  
2.0399528436340854e-05  
4.9467324961997724e-06  
9.306564526748722e-06  
1.2934918894656647e-06  
7.26733200544643e-05  
8.248439664502771e-05  
9.661360241844716e-06  
6.6609863373818206e-06  
1.1092672870266156e-05  
7.679542756338107e-06  
1.996681116647908e-05  
1.1479177151460098e-05  
6.100970078646385e-05  
2.2411726819517338e-05  
4.4320948553395263e-05  
7.28876956298462e-06  
1.4299148621827466e-05  
6.491672595998125e-06  
0.00014642328188751324  
0.00014696760635549657  
1.0425708362243824e-05  
6.93583966835589e-06  
1.34470360917104e-05  
7.131003988028243e-05  
7.4705756065057785e-06  
5.335261283350685e-05  
5.147693503857887e-05  
6.950472241495882e-06  
3.0862050046548466e-05  
7.431256787524169e-06  
1.2574518482706293e-05  
1.634999425542952e-05  
6.475722540479702e-05  
2.2878637794923947e-05  
6.62215847732472e-05  
2.465960959931922e-06  
3.985311099760945e-05  
5.305191372735987e-06  
5.392019382109734e-06  
7.209023725315204e-06  
2.470892881851786e-05  
8.154761986309524e-05  
3.3824680107485095e-06

1.4019250393485311e-05  
1.4642328188751326e-06  
8.340566689795058e-06  
5.8830782901232997e-05  
3.389427821470214e-06  
6.778855642940428e-06  
3.7437770937148275e-05  
3.7437770937148275e-05  
9.747111959967599e-05  
0.00014449665975741437  
5.18239705556929e-05  
1.7141123009724495e-06  
9.776035140857708e-06  
7.110483113242551e-05  
3.550133450936474e-05  
5.8681086252629363e-05  
1.1399736479131656e-05  
1.4707695725308249e-05  
2.522606311232043e-06  
0.00010201622098720187  
1.3125592997884653e-05  
0.00010890987908988588  
7.645519465645472e-05  
6.297379578160153e-05  
6.820960336374841e-06  
1.0199764218170427e-05  
9.998554908859024e-06  
9.863843839727687e-06  
4.320687006516785e-05  
1.9266221300988587e-05  
2.1674498963612157e-05  
5.400858758145981e-06  
9.176946636404033e-06  
6.921268576615648e-06  
7.733624043354574e-06  
7.683124632623714e-06  
1.3213330918993509e-05  
2.0336566928821288e-05  
1.2432165443279426e-05  
8.241460518996995e-06  
8.123483447183954e-05  
1.4139587306734112e-05  
7.386824758899211e-06  
4.306567114338625e-06  
1.689499406394384e-05  
1.0425708362243824e-05

5.6924818012424154e-05  
1.0295387007715775e-05  
1.1321387774807726e-05  
7.128799659129316e-05  
1.7953808405825875e-05  
4.908042968296533e-05  
2.5149036965412586e-05  
6.409579460056514e-06  
1.3524317908329426e-06  
0.00011185111810851708  
1.869763815249176e-05  
6.892309293868302e-06  
0.00015986086155440532  
3.4899616975307715e-06  
8.976904202912937e-06  
1.122495346667478e-05  
2.139301196408473e-05  
3.998208546685738e-06  
5.883078290123301e-06  
8.215770180720818e-06  
7.919528467473673e-06  
4.4400590868855095e-06  
3.0224989380449982e-06  
5.9539587514500876e-05  
9.521745209448116e-06  
1.2526706625357596e-05  
7.425673574310403e-06  
1.304761917809524e-05  
2.052662830198784e-05  
8.404397557319e-05  
9.521745209448116e-06  
2.7115422571761715e-06  
2.6356190739752385e-05  
1.8348782191417699e-06  
7.5389561612564035e-06  
8.95791981335995e-05  
1.0199764218170427e-05  
1.9727687679455375e-05  
5.1149982028453816e-05  
6.70982452641354e-06  
7.867519623806681e-05  
1.7580169917124056e-06  
1.65553961933118e-05  
3.0585765115760393e-05  
4.3636077383696e-05  
9.834399529758352e-06

5.246057073995299e-06  
2.623625358052712e-05  
2.4864330886558853e-05  
2.505341325071519e-05  
2.1674498963612157e-05  
4.084120465870721e-05  
1.6639009305399233e-05  
1.3755840678367634e-05  
1.0425708362243824e-05  
4.673083464495103e-06  
1.297056630893326e-05  
1.304761917809524e-05  
1.0945261935113117e-05  
4.017712003011035e-05  
4.792034679954979e-05  
7.177611857231042e-06  
3.229925335753969e-06  
9.3367072458637e-05  
7.256660445967066e-06  
6.93583966835589e-06  
2.2260296232898976e-05  
5.2073611840922784e-06  
2.0015333186324716e-06  
3.6005725054306536e-05  
7.602747328774727e-05  
1.6808795114638002e-05  
2.915507825193848e-05  
6.892309293868301e-05  
1.2574518482706293e-05  
3.8197377883699104e-05  
1.0295387007715775e-05  
4.6077256538028646e-05  
2.0720275738799047e-05  
4.615795225876075e-05  
3.969305834300058e-05  
6.792832664884636e-06  
4.131064379271534e-05  
6.239628489524713e-05  
4.3853894741684506e-05  
3.283578580533936e-05  
1.3807727755528283e-06  
6.112289132595637e-06  
1.978692998479909e-05  
7.198522598257207e-06  
9.075823257490491e-06  
9.633110650494293e-06

1.1282615898866604e-05  
2.452499138314428e-05  
8.459547669678013e-05  
1.345252691902429e-06  
2.522606311232043e-06  
4.629307506982269e-05  
5.147693503857887e-05  
0.00020302387824739233  
2.5738467519289436e-05  
9.324124082459571e-05  
1.0199764218170427e-05  
5.565074058224744e-06  
1.698208166221159e-05  
1.0696505982042364e-05  
1.5992834186742952e-05  
4.446051069458905e-06  
3.4557942403521487e-05  
8.60188992811762e-06  
3.036427504579768e-06  
3.2748745948996504e-06  
8.404397557319001e-06  
7.28876956298462e-06  
2.361665836895375e-05  
0.0002856523562834435  
1.2574518482706293e-05  
3.414014344527511e-05  
4.3065671143386256e-05  
3.640357836982374e-06  
9.718359417312828e-06  
1.3338153208376712e-05  
3.6005725054306536e-05  
8.447497031971919e-05  
1.021874640964345e-06  
1.0801717516291962e-05  
1.65553961933118e-05  
2.579893377031361e-06  
5.4605367554735606e-05  
2.281074866200132e-05  
1.2919701343015876e-05  
1.5199648638842207e-05  
2.7093123704515196e-06  
1.5595379135948157e-05  
6.70982452641354e-06  
1.1808329184476875e-05  
1.7070071722637555e-05  
6.83511170636732e-06

1.1321387774807726e-05  
1.780823698631918e-05  
7.649823163627821e-06  
8.62440796457866e-06  
7.386824758899211e-06  
8.808887279329007e-06  
2.6676306416753424e-05  
1.3465356304369405e-05  
4.6141790510770976e-05  
5.810447693948939e-06  
1.4740598847736234e-05  
5.386142521747762e-05  
1.9906488474133223e-06  
9.605025779793143e-06  
5.472630967556559e-05  
4.506872561517166e-06  
6.544544780431165e-07  
8.57576705198017e-05  
1.8226964550312852e-05  
1.9610260967077667e-05  
1.2247300529624715e-05  
5.392019382109734e-06  
1.4200533803745897e-05  
2.1818038691848e-05  
4.607725653802865e-06  
1.4324016706387166e-05  
2.3574410321782097e-05  
1.07014695579041e-05  
5.69658301291478e-05  
4.500715631788317e-06  
1.6431540361441637e-06  
1.2247300529624715e-05  
8.62440796457866e-06  
2.2720854085993436e-05  
0.0002428395952679888  
1.3784618587736603e-05  
1.9210051559586286e-05  
2.5342491095915757e-05  
0.00010295387007715774  
2.0984228295981197e-05  
0.00024828295624404424  
4.961632292875072e-05  
2.2260296232898976e-05  
1.5026334515252215e-05  
1.3433328613533328e-05  
0.00010981746141563494



0.001172001478973583  
1.1724284136900528e-05  
5.7697440323450936e-06  
4.412308717592475e-05  
0.00016815150046628412  
2.6967453007932183e-05  
3.5048125983713276e-05  
1.9727687679455375e-05  
4.939316105650747e-06  
8.928248895580076e-06  
1.3784618587736603e-05  
8.976904202912937e-06  
1.2574518482706293e-05  
9.151455117969579e-05  
9.834399529758352e-06  
9.332928732206937e-06  
5.570450941372787e-05  
6.100970078646385e-05  
8.114590744997657e-05  
2.5342491095915757e-05  
6.269855063522409e-05  
1.5009220239038945e-05  
3.5424987553430624e-05  
1.4642328188751325e-05  
6.669076604188356e-06  
1.1130148116449488e-05  
4.5504472962279675e-05  
9.605025779793143e-06  
1.2526706625357596e-05  
5.4605367554735606e-05  
4.877491556818241e-05  
8.976904202912937e-06  
0.00012671245547957877  
6.549749189799301e-06  
5.8830782901232997e-05  
1.2067852902817027e-05  
2.1254992532058373e-05  
7.715512511637116e-06  
3.4588176823822025e-05  
2.7115422571761715e-06  
1.2869233759644718e-05  
5.262817639726914e-06  
0.0001409818761416935  
1.0360137869399524e-05  
0.0002514903696541258  
0.00022878637794923945

8.83250359911273e-06  
3.5048125983713276e-05  
2.553894451526394e-05  
2.20861933573344e-05  
5.5215483393336006e-05  
7.131003988028243e-06  
2.4920755238041212e-05  
5.080221807970776e-06  
2.2185345740532312e-05  
1.9552070281715416e-05  
1.975726442260299e-05  
1.34470360917104e-05  
1.0873015981746035e-05  
1.2432165443279426e-05  
2.7607741696668003e-05  
4.11815480308631e-05  
4.89528059802236e-06  
1.010590135726702e-05  
3.7999121597105518e-06  
1.2671245547957878e-05  
0.0001662374415924749  
5.084141732205322e-06  
2.449460105924943e-05  
0.00011030771793981189  
8.068221655026242e-05  
5.400858758145981e-05  
8.2776980966559e-06  
1.678025726215135e-05  
2.7004293790729904e-05  
1.0044280007527587e-05  
2.6719576986772495e-06  
6.737267571511346e-06  
7.05969394814796e-05  
1.4513320891934132e-05  
8.738790033074398e-06  
2.654733152674495e-06  
2.1406912556653984e-06  
6.2574052088680875e-06  
5.7697440323450936e-06  
1.71888200476646e-05  
8.165645367416134e-05  
8.95791981335995e-05  
3.131676656339399e-06  
6.6556037221596945e-06  
3.6810322262224e-05  
6.778855642940428e-05

2.594113261786652e-05  
1.540937250920977e-05  
5.15171828376708e-06  
1.7712493776715312e-05  
1.7524062991856638e-05  
1.8101779354225542e-05  
3.5810041765967915e-06  
4.412308717592475e-05  
9.280348852025488e-06  
0.00010349289557494392  
9.93323771598708e-05  
4.830680120922358e-06  
1.497510837485931e-05  
2.5738467519289436e-05  
4.384347318875159e-05  
1.0981746141563494e-05  
9.41292526419728e-06  
5.2881602607849885e-06  
0.00010376453047146607  
6.769569539319962e-05  
2.562407433031482e-05  
9.332928732206937e-06  
1.7524062991856638e-05  
3.1678113869894696e-06  
2.614701462277022e-05  
5.622054338684382e-06  
1.5287813654148717e-05  
4.554641256869652e-05  
3.0224989380449984e-05  
1.1907917502900174e-05  
2.751168135673527e-05  
0.00015626200043331455  
2.0462881009124525e-05  
0.0002978100648559591  
3.6524654572827586e-05  
1.307350731138511e-05  
8.44749703197192e-06  
0.0001326653896296261  
9.261713613366803e-05  
1.7712493776715312e-05  
4.563052413392034e-06  
1.1167877432098468e-05  
1.0559371289964899e-05  
1.820178918491187e-05  
9.38610781330213e-06  
1.323101944766686e-05

9.605025779793143e-06  
8.669799585444863e-06  
6.960261639019116e-05  
0.00013663923770608957  
2.0088560015055174e-05  
4.659863992176871e-06  
3.6203558708451085e-05  
1.1282615898866604e-05  
4.159752326349808e-06  
1.701131071842882e-05  
9.805130483538833e-06  
2.3873361177311945e-05  
1.0661889457828635e-05  
4.2021987786595e-05  
5.767218980252163e-05  
2.542070866102661e-06  
6.950472241495882e-06  
8.83250359911273e-06  
1.285667840963531e-05  
1.3178095369876193e-05  
5.127663568045211e-06  
1.2067852902817027e-05  
2.3038628269014325e-06  
9.776035140857708e-06  
1.5839056934947346e-05  
3.2813982494711633e-06  
1.4620667939951398e-05  
1.6472619212345245e-05  
6.2514683917818745e-06  
9.521745209448116e-05  
2.9001090162579652e-06  
1.3727182676954368e-05  
5.454509672962e-06  
3.875910402904762e-06  
2.2335754864196936e-05  
6.575895893151793e-06  
1.611014103896845e-05  
7.977055308641762e-06  
4.544170817198687e-06  
1.9436718834625655e-05  
4.050644068609486e-05  
2.9859732711199832e-05  
1.878559568050776e-05  
7.115602251553019e-06  
4.131064379271534e-05  
1.639066588293059e-05

6.255425017346294e-05  
1.2574518482706293e-05  
2.594113261786652e-05  
1.904349041889623e-05  
5.820713502595491e-06  
9.893464992399545e-06  
3.26190479452381e-06  
2.614701462277022e-05  
4.789762855675607e-05  
1.4282617814172173e-05  
4.9171997648791765e-05  
5.546336435133078e-06  
6.628820608589633e-06  
6.950472241495882e-06  
5.339584833823417e-06  
3.384784769659981e-05  
3.6810322262224e-05  
5.014495955051824e-06  
1.367022341273464e-05  
2.5342491095915757e-05  
1.2671245547957878e-05  
1.1559732780593153e-05  
4.535829062600801e-06  
2.2260296232898976e-05  
1.5801073584983443e-05  
3.4899616975307716e-05  
4.909871598314528e-06  
2.4224440018154766e-05  
4.844888003630953e-05  
1.8665857464413873e-05  
2.522606311232043e-06  
1.1479177151460098e-05  
2.2526658751925114e-05  
1.4449665975741439e-05  
8.715671540923408e-06  
5.351989655674394e-06  
1.4827035806876318e-06  
2.939825303821146e-05  
1.9461780566088706e-05  
7.109942462282772e-05  
8.113803559622988e-06  
7.255583741770873e-05  
6.1165596064850215e-06  
3.092260689945205e-05  
5.311134772806652e-06  
7.593546032607599e-06

6.427331688107817e-06  
2.6889223390827873e-05  
2.6941283842697823e-06  
1.5207839458746914e-05  
1.3252545814050882e-05  
4.96970468026908e-05  
1.026950044631249e-05  
2.7959389545872414e-05  
1.7084313204117157e-06  
6.457156893157042e-06  
4.896835110177158e-05  
3.174564206407626e-05  
5.231268084493769e-06  
6.522737392853168e-06  
1.2260064409474381e-05  
4.2489078182453214e-05  
1.0413600078393583e-05  
1.5207839458746914e-05  
1.4803375643354706e-05  
2.733825757318944e-06  
9.97503448369421e-06  
2.460684899160641e-06  
1.9850460919762374e-05  
2.9669878688173616e-06  
3.353053760181548e-05  
0.00012869524258731491  
6.787889319391914e-06  
4.092697971986302e-05  
5.115872464982877e-06  
1.1620186308771129e-05  
5.8131271455888986e-05  
7.66676204118646e-06  
4.653904048412517e-06  
6.277521701392523e-06  
6.835523630405192e-05  
9.747932122419213e-06  
1.5375881883705441e-06  
1.602515136823811e-05  
2.246194205771336e-06  
6.738582617314007e-06  
6.82953281214892e-05  
2.309572299544137e-05  
3.653874775865232e-05  
4.375840598979065e-06  
1.24242617006727e-05  
1.533352408237292e-05

1.65656822675636e-05  
1.122191379415599e-05  
6.254010384158843e-06  
3.522828634114791e-05  
2.5985383949119376e-06  
3.21273837916385e-05  
5.949480187305503e-05  
3.353053760181548e-05  
6.905793104095992e-06  
1.8719963818053933e-05  
5.738215713300382e-06  
4.697104845486388e-05  
1.490911404080724e-05  
3.859964800208995e-06  
9.530940482707825e-06  
4.717007832119805e-06  
1.5812696709947076e-05  
1.8042363831122755e-05  
4.129131485090037e-05  
7.228661353118662e-06  
1.676526880090774e-05  
1.1644496321969393e-05  
7.099578114670115e-06  
1.1405879594060184e-05  
4.5623518376240736e-05  
0.00011718040509266041  
2.545458494771968e-05  
5.933975737634723e-06  
1.52244782327718e-06  
1.618043384273654e-05  
7.382054697481923e-06  
1.876203115247653e-05  
3.897807592367906e-05  
2.046348985993151e-05  
4.235973547870145e-06  
1.3845943387814355e-05  
2.4534539708645475e-06  
3.81237619308313e-06  
8.589613027625572e-05  
6.0369514554244784e-05  
1.4055730408841843e-05  
6.1019824863551716e-05  
5.435614494044307e-05  
9.248755537902579e-05  
4.75971715856757e-05  
9.02849836480352e-06

1.2498658477323436e-05  
1.62750562628695e-05  
1.3845943387814355e-05  
4.960846026650063e-06  
7.891402516873398e-05  
8.971329655378676e-06  
1.2650157367957658e-05  
7.839534143523056e-06  
5.1729268047410506e-05  
4.355296746401698e-06  
6.472173537094616e-05  
8.38263440045387e-06  
9.730890283044353e-06  
1.8553564139671233e-05  
6.548316755178082e-06  
9.154719147864095e-06  
6.9229716939071775e-06  
3.400856970611835e-05  
3.83338102059323e-06  
0.00010742715062777071  
3.854618588574356e-06  
1.0786955895157694e-05  
1.6969723298479788e-05  
7.583200602045464e-06  
3.876092786839394e-06  
1.0157060660403959e-05  
3.938256539081158e-05  
9.006584533820986e-06  
6.787889319391914e-06  
2.6967389737894235e-06  
8.420679639790273e-06  
1.1359324983472183e-05  
4.96970468026908e-05  
7.501441026821254e-06  
2.5262038919370818e-05  
5.959388909958641e-06  
5.939403154467926e-05  
1.6467660478998137e-05  
1.3985098597742137e-05  
3.87501339592131e-06  
4.166219492441145e-06  
1.4725050904500977e-05  
1.5166401204090927e-05  
1.676526880090774e-05  
1.906188096541565e-05  
5.972177298177435e-06



9.184932742411502e-06  
3.431138573774817e-05  
1.7147471478439217e-06  
3.3230264130754444e-05  
1.0181833979087872e-05  
4.013992241755796e-05  
2.5544145212948006e-06  
9.370486939227896e-06  
1.554767944665187e-05  
7.974311234815716e-06  
5.044775747946861e-05  
2.6337867075243076e-05  
5.834454131972085e-06  
2.154051564203316e-06  
2.3505359974245653e-06  
7.951527488430528e-06  
5.489220159666046e-06  
3.849287165906895e-06  
1.6086905323414364e-05  
8.69698319047089e-05  
1.1995838883408125e-05  
1.8189768764383564e-05  
9.957190057068641e-06  
3.092260689945205e-05  
4.129131485090037e-06  
8.807071585286978e-06  
8.145467183270298e-06  
5.115872464982877e-06  
5.029580640272323e-05  
2.147403256906393e-06  
1.3177247258289229e-06  
4.153783016344306e-05  
7.362525452250489e-06  
4.7170078321198055e-05  
3.217381064682873e-05  
2.0166917543120905e-05  
3.217381064682873e-05  
6.862277147549634e-05  
2.9606751286709414e-06  
2.911124080492348e-06  
3.31313645351272e-05  
6.863217314305018e-06  
3.092260689945205e-05  
5.2842429511721863e-05  
1.5375881883705443e-05  
1.2795561475635334e-05

2.2507356416908086e-06  
2.8989943968236304e-05  
4.952018898488763e-06  
7.583200602045464e-06  
3.5539734845146274e-05  
1.2479975878702624e-05  
5.0785303302019795e-06  
2.55324277151439e-05  
2.9481298950748785e-06  
8.407959579911435e-06  
2.7284653146575343e-06  
5.808990669916042e-05  
2.6255043593874386e-05  
5.908778388430329e-06  
1.690101996528756e-05  
2.214616409244577e-05  
1.880428797939652e-06  
4.840060210349017e-06  
3.899172848967685e-05  
1.3084318857313987e-06  
2.1136971804688745e-05  
1.4850771723322757e-06  
2.002183180540061e-05  
8.53691601518615e-06  
6.310736101928992e-06  
1.1290201302031177e-05  
2.4628624964165355e-05  
6.671658337895478e-05  
5.500068420851157e-06  
2.111024996928459e-05  
2.0909351021417614e-06  
1.5375881883705443e-05  
1.4962551725541317e-05  
7.099578114670115e-06  
1.1073082046222884e-05  
4.5623518376240736e-05  
1.4479888766652887e-06  
2.3288992643938785e-06  
1.3915173104753427e-05  
3.4077974950416554e-05  
3.5172633440135036e-05  
9.450032668762937e-06  
1.5084198487537589e-05  
8.2828411337818e-05  
1.3509876800731482e-05  
1.5994451844544168e-05

7.861679720199674e-06  
6.8379229015987356e-06  
1.0913861258630137e-05  
2.1879202994895324e-06  
4.123014253260274e-06  
3.7107128279342464e-06  
1.0157060660403959e-05  
4.873966061209607e-06  
2.839831245868046e-05  
1.1267346643525039e-05  
2.244382758831198e-05  
3.748194775691158e-05  
2.594904075478494e-05  
5.691277343457434e-06  
9.163762334378285e-07  
3.4657965391664824e-06  
2.135866938565376e-06  
1.783996551891465e-05  
2.5650088672356543e-05  
6.502417338669825e-06  
2.7970197195484275e-05  
0.00012100150525872543  
1.2896360616082878e-06  
1.0703979311348788e-05  
8.185395943972604e-05  
1.113213848380274e-05  
9.580153600518707e-06  
3.8176057900558095e-05  
7.323775318291276e-06  
1.726448276023998e-06  
1.6246553537365354e-06  
1.6086905323414364e-05  
1.0028953589011477e-05  
4.308103128406632e-06  
2.0531424721141167e-06  
7.997225922272084e-06  
3.4787932761883565e-05  
5.425018754289834e-06  
4.9142804645039975e-05  
5.529207856193414e-05  
2.182772251726028e-06  
8.209541654721784e-06  
1.4647550636582551e-05  
6.0831357834987655e-05  
6.89490559244539e-05  
1.5084198487537589e-05

1.9326629312157535e-05  
7.583200602045464e-06  
1.2635798506019002e-05  
1.9668089193997774e-05  
1.0384457540860765e-05  
3.5377558740898537e-05  
4.6730058933873435e-05  
7.695026601706964e-06  
6.157156241041339e-06  
1.24242617006727e-05  
5.785934762891237e-06  
5.4569306293150686e-06  
2.139150361991303e-06  
2.1457475874716152e-06  
9.953628830295724e-07  
8.043452661707182e-06  
7.730651724863013e-06  
1.2387394455270112e-05  
6.742210387229116e-05  
2.1490614833596024e-06  
4.657798528787757e-05  
3.5497890573350575e-05  
2.4892975142671602e-06  
8.863167582645494e-06  
1.3709530152466429e-05  
5.665210424327094e-05  
1.0786955895157694e-05  
4.600057224711876e-05  
5.972177298177435e-06  
4.129131485090037e-06  
2.701101217357507e-06  
5.6141908779985e-05  
2.0166917543120905e-05  
2.1407958622697576e-05  
9.530940482707825e-06  
3.5771653225587215e-05  
2.354513215694319e-06  
2.2626297731306382e-05  
1.950269531149744e-06  
2.1407958622697576e-05  
1.830943829572819e-05  
9.765033757721703e-06  
9.530940482707825e-06  
7.71416845892514e-05  
1.2183391086088051e-05  
9.563692855500635e-06

2.3635113553721317e-05  
2.55324277151439e-05  
7.421425655868493e-06  
4.123014253260274e-06  
1.4962551725541317e-05  
2.605837660066184e-06  
6.405142971117802e-05  
5.33915514810683e-05  
9.245962195849452e-06  
6.184521379890411e-06  
2.932597071602408e-06  
7.542099243768794e-06  
3.1199939696756555e-05  
3.56799310378293e-06  
5.425018754289834e-06  
6.368500276775023e-06  
3.892356113217741e-06  
3.8019598646867284e-06  
2.2000273683404626e-05  
2.7609470445939332e-06  
3.118246073894325e-05  
2.2811759188120368e-05  
5.871381056857985e-06  
2.3854582465291587e-05  
1.2914313786314083e-05  
3.7107128279342466e-05  
1.97098769189142e-05  
1.783996551891465e-05  
3.522828634114791e-05  
9.782195504220334e-06  
5.234547876396273e-05  
5.112348327808376e-05  
4.294806513812786e-06  
4.033383508624181e-05  
3.750720513410627e-06  
1.554767944665187e-05  
5.921350257341883e-06  
1.2100150525872543e-05  
5.1922287704303825e-06  
2.891464541247465e-05  
1.1021919290893802e-05  
1.276621385757195e-05  
1.0662967896362778e-05  
2.9989597208520308e-05  
2.1742457976177225e-05  
1.5207839458746914e-05

8.97753103532479e-06  
2.147403256906393e-06  
1.0581880688025417e-05  
6.010873911340572e-06  
7.839534143523056e-06  
4.554884813339909e-06  
8.113803559622988e-06  
1.8430692853978046e-05  
5.734274631079709e-06  
7.461218822924088e-06  
2.6759948278371973e-05  
1.5235590990605938e-05  
3.975763744215265e-05  
5.218189914282535e-05  
8.020272682855001e-06  
2.248916865414695e-05  
5.810093154385564e-06  
9.339042352183507e-06  
4.1128590457399286e-05  
7.521715191758609e-05  
1.2502401711368757e-06  
1.9371470679471125e-05  
3.795047210387297e-05  
2.1004034875099506e-05  
5.797988793647261e-05  
2.7691886775628708e-06  
1.2592916836880927e-05  
8.45907179620269e-06  
5.280900609014582e-06  
1.1842700514683766e-05  
7.88395076756568e-06  
3.319723205905389e-05  
3.8071609041733036e-06  
1.0541797806631383e-05  
5.125293961235148e-06  
7.66676204118646e-06  
4.3827316865365115e-05  
2.6090949571412673e-05  
2.7970197195484275e-05  
1.8703189656926645e-05  
6.9229716939071775e-06  
1.783996551891465e-05  
3.614330676559331e-05  
3.702485083304681e-05  
4.1434758624575956e-05  
7.583200602045464e-06

5.679662491736092e-05  
3.998612961136042e-06  
2.7048932601032576e-05  
5.834454131972085e-06  
4.0987255095002724e-05  
1.0703979311348788e-05  
3.1733576065572237e-06  
1.495309372824325e-05  
3.381573050972886e-06  
5.908778388430329e-06  
0.0001115444737855986  
0.00014082825792762505  
6.722305847706968e-05  
6.787889319391914e-06  
6.457156893157042e-06  
8.066767017248362e-05  
1.7321792246581027e-05  
1.886803132847922e-05  
3.389810744154306e-06  
7.266408931986123e-06  
2.1163761376050833e-05  
3.381573050972886e-06  
2.2886797869660237e-06  
7.421425655868493e-06  
3.799364670239843e-05  
2.2534693287050078e-05  
2.7500342104255783e-06  
1.2737000553550046e-05  
4.351891510478006e-06  
9.065259351630897e-06  
2.2017678963217445e-05  
7.928873563962065e-06  
8.38263440045387e-06  
2.130960659227171e-06  
5.9213502573418825e-05  
2.8989943968236304e-05  
4.481537231804646e-06  
2.37866206918862e-05  
2.7554798227234505e-05  
2.785820441392077e-06  
4.261921318454342e-06  
2.642957854654022e-06  
1.3709530152466429e-05  
6.706107520363096e-06  
2.37866206918862e-05  
4.25540461919065e-06

1.3127521796937193e-05  
9.276782069835617e-06  
7.687940941852721e-06  
9.530940482707825e-06  
2.3386845554207438e-05  
0.0001623436862221233  
2.4369830306048027e-05  
2.1083595613262766e-05  
3.176980160902608e-05  
3.7608575958793045e-05  
4.1745519314260276e-05  
8.344931397153478e-06  
1.70738320303723e-05  
6.487260188696235e-06  
1.8249407350496295e-05  
5.090916989543936e-05  
9.573092062238229e-05  
2.3127711531446136e-05  
5.467651514637888e-06  
2.5185833673761858e-06  
3.31313645351272e-05  
7.795615184735812e-06  
7.13598620756586e-05  
2.5888694148378463e-05  
2.6759948278371973e-05  
1.9564391008440667e-05  
6.1165596064850215e-06  
4.790076800259354e-06  
6.163974797232967e-05  
7.861679720199674e-06  
3.109535889330374e-05  
5.702939797030092e-06  
2.4959951757405248e-05  
2.2383656468772265e-05  
1.3379974139185987e-05  
5.88379412463147e-06  
1.2242087775442895e-05  
2.449854419850955e-06  
1.2341616944348936e-05  
2.164582482961644e-05  
5.260935011248932e-06  
3.4962746494355343e-06  
2.7554798227234505e-05  
1.1693422777103719e-05  
1.1595977587294522e-05  
3.0650161023685953e-06



4.934458547784903e-06  
5.083168257444173e-06  
1.419915622934023e-05  
6.442209770719178e-06  
6.650022989129474e-06  
5.489220159666046e-06  
3.8019598646867284e-06  
6.8379229015987356e-06  
1.174276211371597e-05  
3.3774692001828705e-06  
4.503292266910493e-06  
2.7374111025744444e-05  
5.510959645446901e-06  
5.588422933635913e-05  
3.868011981863356e-06  
1.0157060660403959e-05  
5.859020254633021e-06  
8.696983190470891e-06  
4.749205837799803e-06  
8.344931397153478e-06  
2.7784039477045107e-05  
1.4764109394963846e-05  
3.7206345199875468e-06  
2.645470172006354e-06  
5.708788966052688e-05  
6.143564284659349e-06  
5.588422933635913e-06  
7.951527488430528e-06  
6.706107520363096e-06  
7.1635382778653415e-06  
1.778296882396604e-05  
4.074721260542731e-06  
2.7464157443592286e-05  
8.246028506520547e-07  
1.4570861889794162e-05  
5.251008718774877e-05  
1.6303659173700558e-06  
7.382054697481923e-06  
2.841764418942156e-06  
2.1004034875099506e-06  
7.567163621920292e-05  
9.703746934974494e-07  
4.1434758624575956e-05  
1.8390096614211577e-05  
7.773839723325935e-06  
6.931593078332965e-06

6.927026142922642e-05  
2.7365138849072616e-06  
1.5812696709947076e-05  
5.622292163536738e-06  
1.5375881883705443e-05  
0.00010703979311348789  
5.510959645446901e-05  
1.3444611695413936e-05  
1.5461303449726026e-05  
2.4885555477949496e-05  
2.348552422743194e-05  
8.233830239499068e-06  
1.3985098597742137e-05  
7.099578114670115e-06  
8.33243898488229e-06  
1.4091314536459166e-05  
5.1300177344713086e-05  
1.1267346643525039e-05  
2.028450889905747e-06  
6.722305847706968e-06  
2.0645657425450184e-06  
2.7760943849882144e-05  
0.00013859734168081102  
4.592466371205751e-06  
6.325078683978829e-06  
2.2749601806136387e-05  
7.951527488430528e-06  
4.32820314300262e-06  
4.123014253260274e-06  
1.5375881883705443e-05  
1.7805723742486788e-06  
1.4570861889794162e-05  
6.740914306800967e-05  
3.3939446596959576e-05  
1.554767944665187e-05  
7.111672796296469e-06  
2.7998336226868057e-06  
4.863555648263333e-05  
8.484861649239894e-06  
1.03458536094821e-05  
6.975024112658358e-06  
1.7614143170573956e-05  
0.00022607284035733858  
1.7852681103746375e-05  
0.00020545893174803715  
6.517645482320106e-06

0.00011792519580299512  
2.026973503969909e-06  
2.094081731339868e-06  
5.3768056818985414e-05  
5.311134772806652e-06  
6.726367663929148e-05  
5.5218940891878665e-06  
6.900085837067815e-05  
3.085404236087234e-06  
1.4419868502335156e-05  
3.217381064682873e-05  
3.0360377683098382e-05  
4.908350301500327e-06  
6.339486608088121e-06  
1.1313148865653191e-05  
5.588422933635913e-05  
2.9065635727944493e-05  
1.2621472203857984e-05  
1.641908330944357e-05  
2.747319467868396e-06  
5.57722368927993e-06  
1.8932208305786975e-05  
9.5966711067265e-05  
4.159991959567541e-06  
2.16410157150131e-06  
9.402143989698261e-06  
1.0871228988088612e-05  
6.706107520363096e-05  
2.545458494771968e-05  
2.9218211243576742e-05  
3.4591390768878574e-05  
9.370486939227896e-06  
1.3763771616966792e-05  
3.5352592220968476e-05  
4.004366361080122e-05  
2.0925072337975074e-05  
4.1169151197495345e-05  
1.9254873926065425e-05  
2.6771030853345352e-05  
2.945847024402867e-06  
5.364663604596158e-05  
5.150881885706954e-05  
3.5764424030641056e-05  
4.180681530522425e-05  
3.872966392489048e-06  
1.4672584217698894e-05

3.2193011785668464e-06  
2.7371278181895697e-05  
3.971647453996303e-05  
1.8650484827830595e-05  
4.448830200118615e-06  
4.7537344505940345e-06  
1.9340288449184857e-06  
2.344007309739916e-06  
3.0067955835284435e-05  
5.489024311657141e-05  
2.287779248336859e-06  
1.85445161640361e-05  
3.7864733465029404e-06  
1.5581505363928027e-06  
1.981751634598292e-05  
4.2095138169398206e-06  
2.62190508357506e-06  
6.228362280166061e-06  
3.65934954110476e-05  
6.722241227492004e-06  
4.6452017005804715e-06  
6.305573382812748e-06  
3.708259437765942e-06  
1.1220211460593272e-05  
5.824231903208722e-06  
2.3170588525997386e-05  
2.161400507989639e-06  
1.1890509807589754e-05  
1.547615373874934e-05  
1.852441588638161e-05  
4.7242995623550615e-06  
1.3269119640353783e-05  
1.4301300455863964e-06  
6.57736533896847e-06  
1.4166633037778243e-05  
8.765240911251976e-05  
1.1729045031826942e-06  
1.1810748905887654e-06  
2.6615385325128228e-05  
3.2605742705997546e-06  
0.00013113622144568385  
2.38429493537607e-05  
4.157898524906499e-06  
4.624087147396015e-05  
2.825831034519787e-05  
1.8209412394280252e-06

3.3985495738099887e-06  
1.8440468382364774e-05  
1.4486855303550806e-05  
1.5087063997859881e-05  
1.3665212763946432e-05  
5.00311068406782e-06  
2.4106615460358372e-06  
1.3492031464550707e-06  
5.673212734698448e-05  
3.0641541338166364e-05  
9.304565601467593e-06  
2.9803686692200876e-06  
1.2142828318095636e-05  
3.6418824788560504e-06  
2.5574560200681873e-05  
7.3895823662987165e-06  
1.2611146765625496e-05  
2.6129259565765158e-06  
4.359853596116243e-06  
2.766070257354716e-05  
3.4839012754353536e-06  
1.0105620918150232e-05  
5.48902431165714e-06  
7.443652481174073e-06  
1.5145893386011762e-05  
2.986201093230303e-06  
1.1765217876952082e-06  
7.353969921159928e-05  
0.00011622705532644038  
1.097804862331428e-05  
3.8058104431656045e-05  
2.838974434680344e-05  
3.012732001264926e-06  
2.547493753991127e-06  
2.9920563894915394e-06  
3.1184238936798744e-05  
1.3834530903360697e-06  
6.013591167056887e-06  
2.862943261990028e-06  
5.261892271174776e-05  
1.4532845320387477e-05  
1.5259487586406852e-05  
2.6264178289856883e-06  
2.1492236037192748e-05  
1.7030678109829072e-06  
6.305573382812748e-06

3.2466994864695428e-06  
5.48902431165714e-06  
1.6768667677370165e-05  
1.6768667677370165e-05  
0.0002557948786160686  
8.07380295577082e-06  
0.00023522530271536253  
5.672671965207008e-06  
2.6584473147050263e-06  
9.210958301654035e-06  
8.579631574686583e-05  
3.0276761084140572e-06  
2.934516843539779e-05  
2.0436813731794887e-05  
2.0867675331838427e-05  
1.0264229318210885e-05  
2.0318891593085022e-06  
3.892726425103788e-06  
5.430422628614538e-06  
4.250553645238677e-06  
1.9315807071401077e-05  
1.2769445679001548e-05  
1.2716239655339043e-05  
5.449816995145303e-05  
1.812682110696278e-05  
1.7519503543521068e-06  
4.875235650609218e-06  
2.7007942630808584e-05  
2.2741412200308273e-06  
3.590467667389847e-06  
2.062092917082007e-06  
3.302919390997154e-06  
7.579215688612674e-06  
5.4069050503016394e-05  
2.9572650361253586e-06  
6.438602357133693e-06  
8.855952617111119e-05  
5.498914445552018e-05  
2.2606648276158296e-06  
3.536967321352581e-05  
2.363194980195751e-05  
2.5291968375259974e-06  
4.180681530522425e-05  
1.6861312250173316e-05  
6.17793019692585e-06  
1.4815036491657137e-05

1.5138380542070286e-06  
4.286372917530015e-06  
0.0001500933205220346  
3.331765848560448e-06  
9.002647543602861e-06  
3.507928180783184e-06  
1.8473955915746791e-06  
3.0367139475436523e-05  
7.591784868859131e-06  
0.00016153710866517648  
4.238746551779681e-05  
3.7864733465029404e-06  
3.973824892293451e-06  
1.038060380027677e-05  
1.23558603938517e-05  
4.298447207438549e-06  
1.192147467688035e-05  
5.715163890040019e-06  
3.830833703700464e-05  
2.7249084975726514e-05  
9.137417716411286e-06  
1.3064629782882579e-06  
0.00011910940236812417  
2.630946135587388e-05  
1.1473298937148007e-05  
3.7584944794105544e-06  
2.7200512631741266e-06  
5.891694048805734e-06  
1.4031712723132736e-05  
9.973521298305132e-06  
4.828951767850269e-06  
3.472708018325521e-05  
2.1552948568371255e-06  
1.0505671315942753e-05  
2.2606648276158296e-06  
6.676025819052997e-05  
0.000123422326066526  
0.00014188646352273037  
3.502177478847474e-05  
9.309501710539988e-05  
6.13446737141984e-05  
5.5691560534331576e-05  
2.048253367302933e-05  
5.813138128154991e-05  
1.774359021675215e-06  
1.3685639090947849e-05

4.2803611743076725e-06  
5.548904576875219e-06  
6.265973163500398e-05  
3.7469582778162925e-06  
5.24381016715012e-06  
9.557090346392599e-06  
3.5569901133815502e-06  
3.018691906311939e-06  
2.1096065787659238e-05  
4.702461505826456e-06  
5.715163890040019e-06  
2.1135024357904226e-06  
1.4532845320387477e-05  
5.016094535324052e-05  
4.666509965262034e-06  
8.052500045597284e-06  
9.537179741504282e-06  
6.936130721094023e-05  
3.0641541338166364e-05  
6.605838781994308e-06  
4.501323771801431e-06  
7.86571525072518e-06  
9.466183366257351e-07  
6.079477126058506e-06  
2.280939848491308e-06  
2.7432786672192094e-05  
6.57736533896847e-06  
4.238746551779681e-06  
1.3935605101741417e-06  
2.515300151605525e-05  
1.1684140571521326e-06  
1.1025641319658129e-05  
2.1737161803998363e-06  
3.668146054424723e-05  
1.7030678109829073e-05  
2.5097841425011267e-06  
1.1057599700294819e-05  
1.2306038376134558e-05  
5.8242319032087216e-05  
2.2115199400589638e-05  
2.0932081737183606e-06  
7.130601675891052e-06  
4.281999067614167e-05  
5.335485170072326e-06  
2.257320648876753e-05  
0.00010310464585410032



1.7784950566907754e-05  
2.568937304108897e-05  
2.870123057004423e-05  
8.489905245731485e-05  
4.555070921315477e-06  
1.9050546300133399e-06  
4.0873627463589773e-05  
3.5820393395321246e-06  
5.984112778983079e-06  
9.448599124710123e-06  
2.4259916671553023e-06  
5.143647501036017e-05  
2.0789492624532493e-06  
3.6332113300968692e-06  
2.4612076752269116e-05  
8.07380295577082e-06  
6.678112729280898e-06  
2.6196545212715623e-05  
1.2877204714267386e-05  
4.448830200118615e-06  
8.76982045195796e-06  
4.776052452709499e-06  
3.8631614142802155e-05  
4.448830200118615e-06  
1.1387677303288695e-05  
3.4680653605470113e-06  
2.7055829053912857e-06  
1.2110704433656229e-05  
6.279624521155082e-06  
2.1193732758898404e-05  
1.4772011216269943e-06  
5.869033687079558e-06  
2.7702549324793074e-05  
8.883948252360153e-05  
1.3758554381186505e-05  
1.740625960426637e-05  
7.032021929219747e-06  
7.316192678414243e-05  
1.740625960426637e-05  
5.078032474677821e-06  
7.0645775862994675e-06  
4.914488755686586e-06  
6.82751122434311e-06  
8.402801534365005e-07  
5.715163890040019e-06  
3.353733535474033e-06

2.810218708362219e-06  
4.448830200118615e-06  
4.4102565278632516e-05  
2.87553158035305e-06  
5.071128805150313e-05  
4.624087147396015e-05  
1.7910196697660623e-06  
9.083028325242172e-06  
2.2195618307500875e-05  
3.5736504886198716e-06  
4.08007689476119e-06  
8.293199775221114e-06  
3.7218262405870366e-06  
9.497606381581028e-06  
1.823116796464379e-06  
0.00013530580125877995  
8.524853400227291e-06  
4.157898524906499e-06  
6.228362280166061e-06  
7.554201775448936e-06  
3.6858665667649396e-06  
2.9783156023985818e-05  
4.938345497219045e-06  
1.655042037571242e-06  
6.812271243931629e-06  
5.06959720478633e-05  
4.091015438714973e-06  
0.00015143002948342675  
1.870035243432212e-06  
4.4445109474971405e-05  
3.0367139475436515e-06  
5.683235600151527e-06  
1.6233497432347714e-06  
3.957792169385062e-05  
4.768589870752141e-06  
1.8609131202935185e-05  
6.883979362288805e-06  
2.4974611434381096e-06  
3.3985495738099887e-06  
1.1113974935474763e-06  
4.986760649152566e-06  
1.1684140571521326e-06  
1.3685639090947849e-05  
3.7864733465029404e-06  
8.353734080149734e-06  
1.23558603938517e-05

0.00012324970742867074  
8.384333838685082e-06  
7.629743793203426e-06  
8.921068451567875e-07  
3.491873589566785e-06  
6.203043734311728e-06  
1.8023016834338797e-05  
2.291214352313341e-06  
3.5052421714563976e-06  
4.135362489541152e-06  
1.4672584217698896e-06  
2.5995719908699917e-06  
8.524853400227291e-06  
2.283215100210501e-06  
4.652282800733796e-06  
1.30758248383949e-06  
1.4305769612256424e-05  
8.031309256003606e-06  
9.151116993347436e-06  
3.902682247162878e-06  
6.751985657702146e-06  
1.3385515426672676e-05  
4.936348592448637e-06  
4.610117095591193e-06  
4.196359086261884e-05  
3.390997241423744e-06  
1.963898016268578e-06  
2.2606648276158296e-06  
5.7044813407128414e-05  
3.6505951163652752e-06  
4.184502994444292e-06  
1.7847353902230235e-05  
5.449816995145303e-05  
3.7677747126930495e-06  
4.596231200724955e-06  
1.5895299569173805e-05  
2.1047569084699103e-06  
7.785452850207577e-06  
9.543144206633429e-06  
4.448830200118615e-06  
6.936130721094023e-05  
8.270724979082303e-06  
5.683235600151527e-06  
1.848975687590281e-05  
2.3233993869283512e-05  
6.792056789201863e-06

1.1865853488652293e-06  
5.316894629410053e-06  
2.379647186964031e-05  
1.224023068428357e-05  
7.225136167806274e-07  
5.914530072250717e-06  
1.2306038376134558e-05  
0.00014532845320387475  
6.228362280166061e-05  
6.043361420359149e-06  
1.870035243432212e-06  
2.048253367302933e-06  
1.3716393336096047e-05  
8.923676951115117e-06  
1.865463030123087e-06  
6.5397803941743646e-06  
1.4129155172598935e-05  
2.7643999250737048e-06  
8.89766040023723e-06  
5.579337325925723e-06  
6.722241227492004e-06  
1.660280548471566e-05  
3.0216807101795743e-05  
2.734675194696568e-06  
5.373059009298187e-06  
4.938345497219045e-06  
6.230905506903573e-07  
6.413795132640358e-05  
1.854129718882971e-06  
1.1516594404835358e-05  
9.973521298305132e-06  
0.00011807936822814824  
1.6285472344084151e-06  
1.9563445623598527e-05  
6.144760101908798e-05  
5.869033687079558e-06  
3.6046033668677594e-05  
3.454978321450608e-05  
6.116027088740222e-06  
5.4824506298467725e-05  
1.1138312106866314e-05  
3.474139030180194e-05  
2.2899640307022555e-05  
4.768589870752141e-06  
1.2823098812106596e-05  
8.45400974316169e-06

2.8791486012088395e-06  
5.137874608217795e-06  
5.846546967971973e-06  
4.1491053860320744e-05  
4.4139013679689236e-05  
2.672414638600149e-06  
8.031309256003606e-06  
4.5136140756152234e-05  
7.164078679064249e-06  
9.719418844845127e-06  
2.3085457770660897e-06  
4.448830200118615e-06  
4.250553645238677e-06  
2.898450156077279e-05  
5.213947922462478e-06  
2.6538239280707568e-06  
4.488084584237309e-06  
1.0172991724271233e-05  
7.706811912326693e-06  
1.6631594099625995e-05  
3.565300837945526e-06  
1.727489160725304e-05  
9.137417716411286e-06  
3.633211330096869e-05  
7.6680842142748e-06  
3.2329422852556887e-06  
1.2528314931368516e-06  
6.446762816394951e-07  
3.3834784005336696e-06  
3.491873589566785e-06  
7.147300977239743e-06  
2.277535460657739e-05  
5.134417088293018e-05  
6.5304511782055e-06  
5.373059009298187e-06  
5.627142927742223e-05  
3.984200414205444e-06  
4.410256527863251e-06  
1.2372557502492043e-05  
1.2306038376134558e-05  
1.0938700778786272e-05  
5.926014596662855e-07  
5.202098040820517e-06  
1.23558603938517e-05  
1.0172991724271233e-05  
1.7068778060857774e-06

9.19246240144991e-06  
3.8608342086089626e-05  
3.0827247649306772e-06  
5.75829720241768e-05  
4.6381421235279185e-06  
2.825831034519787e-05  
2.7660702573547163e-06  
4.501323771801431e-06  
5.459566220539124e-06  
4.922415350453822e-06  
2.0903407652612126e-05  
4.7242995623550615e-06  
4.310589713674251e-06  
1.3956848402201389e-05  
3.6332113300968692e-06  
1.0505671315942753e-05  
2.684953827520267e-05  
4.047609439365213e-06  
3.2536220866539128e-06  
7.989260516443376e-06  
3.1141811400830306e-05  
9.50154893300551e-06  
0.00022253419396843323  
8.430656125086658e-06  
7.071124924192238e-07  
7.920149266301134e-06  
1.6631594099625995e-05  
3.676984960579964e-05  
4.2297087126500864e-05  
2.354859195433156e-06  
3.088965098462925e-05  
2.6505313425520585e-05  
0.00012390182228279068  
8.415158595444955e-06  
2.30042526428244e-05  
3.9126891247197054e-05  
1.7702421793975463e-05  
6.1654495298613544e-06  
1.8130084261077446e-05  
2.0817854824565963e-06  
4.08007689476119e-06  
7.6680842142748e-06  
2.749457222776009e-06  
2.122320943867434e-06  
3.293414586994285e-05  
7.312853475913826e-06

1.9438837689690254e-05  
3.980735892106135e-05  
1.0189975015964508e-05  
4.582428704626682e-06  
1.9869124461467256e-06  
2.4592244297190735e-06  
8.536776272115721e-06  
3.1593142000842343e-06  
1.5108403550897871e-06  
1.5093459531559695e-06  
4.186416347436722e-05  
4.047609439365213e-06  
2.6538239280707568e-06  
3.334192480642429e-06  
9.040544563197075e-06  
2.477189543247865e-06  
2.1252768226193384e-06  
1.5429208884132306e-06  
3.5820393395321246e-06  
7.283764957712101e-06  
4.605479150827018e-06  
5.392045083535989e-06  
2.354859195433156e-06  
1.8166056650484344e-05  
7.629743793203426e-05  
3.7584944794105544e-06  
3.226107312136755e-06  
1.4672584217698894e-05  
3.6947911831493582e-06  
0.00011622705532644038  
8.270724979082303e-06  
2.9979346928107763e-06  
0.00016414588240357968  
7.86571525072518e-06  
5.124454786479912e-05  
4.474923045867112e-06  
4.652282800733795e-05  
1.0139194409572658e-05  
3.5322887931497338e-06  
3.980735892106135e-05  
3.540484358795093e-06  
1.3809491028422491e-06  
4.624087147396015e-06  
1.0746118018596374e-05  
2.6771030853345352e-05  
2.062092917082007e-05

5.884121177277706e-05  
3.120549608672158e-06  
0.00025211327316672187  
2.481217493724691e-05  
2.1076640312716646e-05  
3.366063438177982e-05  
2.895538441443425e-05  
1.9999328422551573e-06  
2.7395848449563464e-06  
2.0211241836300463e-05  
1.431471630995014e-05  
4.2028249708323956e-05  
3.864940443252944e-06  
1.7242358854697007e-06  
1.6233497432347712e-05  
0.00017673417826064432  
4.695226949663647e-05  
1.0596866379449202e-05  
2.6174078192807633e-06  
4.2095138169398206e-06  
8.017243915800448e-06  
2.287779248336859e-06  
2.6771030853345355e-06  
3.541231296423531e-05  
2.1454464093366396e-05  
1.636406175485989e-05  
1.1648463806417444e-05  
4.461838475557559e-06  
3.6159923190537556e-05  
1.038060380027677e-05  
3.372262450034663e-05  
3.6947911831493582e-06  
2.1193732758898404e-06  
1.3788693602174867e-05  
8.315797049812997e-06  
5.261892271174776e-06  
2.630946135587388e-05  
7.825378249439412e-06  
4.227004871580845e-06  
9.002647543602862e-07  
6.479612563230086e-06  
3.421409772736962e-06  
3.699269717916812e-05  
5.589555892456722e-06  
2.76941698482883e-06  
6.384722839500774e-06



4.372346013297092e-06  
5.4777647746075874e-05  
1.6079544348163172e-06  
6.98374717913357e-06  
1.760033170289141e-06  
3.448471770939401e-05  
7.2664226601937385e-06  
9.002647543602861e-06  
6.634559820176891e-05  
2.3431074988724533e-05  
5.542472307272967e-05  
4.938345497219045e-06  
2.7200512631741266e-06  
9.027979668725553e-05  
1.9480196918817258e-05  
4.488084584237309e-05  
7.164078679064249e-06  
1.1516594404835357e-06  
1.7419506377176768e-06  
6.848331598042199e-05  
3.729406334763385e-05  
2.586353828204551e-05  
9.719418844845127e-06  
1.573143050145036e-05  
1.8340730272123618e-06  
1.4395743006044197e-06  
2.0537668353172073e-06  
3.120549608672158e-06  
3.133365007475739e-06  
3.05189751728137e-06  
3.730926060246174e-06  
1.2306038376134558e-05  
0.00012716239655339044  
9.436912545706153e-07  
4.95437908649573e-06  
3.912689124719706e-06  
3.824432979049336e-06  
1.266347517544137e-05  
0.00010832352298992517  
1.2559249042310166e-06  
5.8020865347554555e-06  
3.212523702401442e-06  
2.3226008502902358e-06  
5.342490183424718e-05  
7.989260516443376e-06  
1.573143050145036e-05

3.1462861002900726e-06  
6.936130721094023e-06  
9.029282595507012e-06  
2.481217493724691e-05  
6.103795034562741e-05  
4.624087147396015e-06  
9.657903535700539e-06  
8.248371668328028e-06  
4.8597094224225635e-06  
4.286372917530015e-06  
2.945847024402867e-06  
6.737080612100155e-06  
1.7641026111453006e-05  
1.2975754750345962e-06  
6.438602357133693e-06  
1.9947042596610264e-05  
1.116547872176111e-05  
1.9830393224700262e-06  
4.0631771679781555e-05  
1.0172991724271233e-05  
2.766070257354716e-05  
4.16925890338985e-06  
1.2059658261122378e-05  
2.3719410756072826e-05  
1.422133046263453e-06  
1.048762033430024e-05  
4.906587648362332e-06  
1.0282673575745857e-06  
0.0010002017073443147  
1.1345343930414016e-05  
2.1583433644139818e-06  
4.307547660241877e-05  
5.14890685430906e-05  
4.058374358086928e-05  
6.253888355084775e-06  
6.186278751246022e-05  
1.4960281947457696e-05  
6.30557338281275e-05  
3.902682247162878e-06  
1.1057599700294819e-05  
9.390453899327292e-06  
2.1208460856715564e-06  
3.54871804335043e-06  
5.298433189724601e-06  
7.288113474104763e-05  
5.937543807940409e-06

1.5518122969227306e-05  
7.554201775448936e-06  
5.780108934245019e-06  
8.477493103559362e-06  
3.372262450034663e-05  
0.00020078273140009014  
1.0421113473643704e-05  
7.336292108849447e-06  
2.3905202485232665e-05  
2.489312819968491e-06  
1.2559249042310164e-05  
1.146467887784136e-06  
4.372346013297092e-06  
9.083028325242172e-06  
9.657903535700539e-06  
5.1321146591054425e-05  
9.657903535700539e-06  
1.7499412369732627e-06  
4.146599887610557e-06  
2.2341855909819693e-06  
6.7453530588242465e-06  
1.0039136570004507e-05  
1.0439786262079944e-05  
4.185894350385919e-05  
2.7577387204349733e-05  
1.5355459206447144e-05  
4.353634118803666e-05  
1.66770356135594e-05  
4.9826898241328486e-05  
1.0708412341338142e-05  
4.76858987075214e-05  
1.067594747183315e-05  
2.9572650361253586e-06  
4.521329655231659e-07  
0.0001191141436069733  
9.809670591261548e-05  
1.8058565191014025e-05  
1.584813250813768e-05  
3.356684466873482e-07  
1.619903140807521e-05  
5.19588286992348e-05  
4.892821670992177e-05  
5.360475732929807e-05  
2.0874812019708414e-06  
7.516988958821109e-06  
1.1648463806417444e-05

3.476845272852193e-05  
7.419523948009814e-06  
2.8469193258221737e-06  
4.423039880117927e-06  
1.7340326802735057e-05  
3.0641541338166364e-05  
4.135362489541152e-06  
4.772318244380563e-06  
1.0451703826306063e-05  
5.960737338440175e-06  
2.179926798058122e-05  
4.768589870752141e-06  
4.8597094224225635e-06  
0.00018899365359311237  
2.3992905010073664e-06  
1.2284023996213028e-05  
8.719707192232486e-06  
3.943020048167145e-06  
7.785452850207577e-06  
6.187951170481286e-06  
2.336828114304265e-06  
2.5097841425011267e-06  
4.671271710124547e-06  
1.4287909725100047e-06  
3.973824892293451e-06  
3.192361419750387e-06  
4.507972699086219e-06  
1.781609759066766e-06  
5.7366494685740035e-06  
1.1678179275311363e-05  
1.4911551387368257e-05  
2.0808392163282067e-05  
2.3898962547230777e-06  
4.5465884801212216e-05  
3.5308673489673795e-05  
4.4811478229015485e-05  
2.2008876326548345e-05  
1.753964090391592e-06  
1.2473695574719495e-05  
7.6680842142748e-06  
4.5861847937288344e-05  
1.6750260797373052e-06  
7.879253486957065e-06  
1.6062618512007212e-05  
2.1235867416470766e-05  
1.3192640564616873e-05

5.846546967971973e-06  
2.7577387204349733e-05  
3.011740971001352e-05  
1.8979462172147825e-05  
2.2051282639316257e-06  
2.2946597874296014e-05  
2.690476800424364e-06  
2.424890195342746e-05  
3.824432979049336e-06  
4.322801015979278e-06  
2.534798602393165e-05  
5.914530072250717e-06  
2.79990597915722e-06  
5.846546967971973e-06  
1.614760591154164e-05  
2.110579195906895e-06  
3.300721108540583e-05  
2.4691727486095226e-06  
1.858646478246876e-06  
2.7152113143072687e-05  
1.1481931968703422e-06  
7.09743608670086e-06  
1.4960281947457697e-06  
4.203715588541832e-06  
1.096227556494745e-06  
8.604974202861005e-06  
2.912115951604361e-06  
4.582428704626682e-06  
5.8020865347554555e-06  
5.787416278030412e-06  
2.526405229537558e-06  
7.72632282856043e-06  
2.9745589837050387e-06  
1.1783388097611468e-06  
4.1381661251272816e-05  
3.1790599138347606e-06  
5.316894629410053e-06  
8.226138860596685e-06  
5.651662069039574e-05  
6.174359139008552e-05  
2.116433784522448e-06  
2.396464481571551e-06  
1.9074359483008565e-06  
6.984976712087643e-05  
3.912689124719706e-06  
3.339056364640449e-06

3.777100887724468e-05  
2.895538441443425e-06  
1.2968403047937834e-05  
8.129721676295604e-07  
3.863161414280215e-06  
3.039738563029253e-06  
1.9817516345982923e-06  
3.5432246717662968e-06  
7.735224122141722e-05  
1.5078545045856571e-06  
2.005188907543607e-06  
2.5574560200681873e-05  
3.590467667389847e-06  
5.019568285002253e-06  
1.568292660473469e-06  
2.663086838814459e-06  
1.2812332146437322e-06  
2.067681244770576e-06  
7.629743793203426e-06  
4.82725442100744e-05  
8.681124417045618e-06  
1.2769445679001548e-06  
5.844059075645177e-05  
6.549136303178906e-06  
4.324551137848095e-05  
3.3172799100884456e-05  
2.734675194696568e-06  
1.504880432584502e-06  
3.5160109646098733e-06  
3.076509594033639e-05  
3.2466994864695424e-05  
9.627436963032713e-07  
3.5569901133815502e-06  
5.2923078334359013e-05  
1.1783388097611467e-05  
6.358119827669522e-05  
3.212523702401442e-06  
4.2743662707021984e-05  
2.7577387204349733e-05  
6.649014198870088e-06  
0.00010636259934763139  
1.66770356135594e-05  
1.1829060144501433e-06  
8.38894314810712e-07  
3.8053585003508354e-06  
2.577616146352509e-06

2.9086999798136227e-05  
3.088965098462925e-06  
1.6842701530250387e-06  
4.986760649152566e-06  
1.9315807071401077e-05  
1.952589582393711e-06  
1.0207015107964448e-05  
1.0822331621565143e-05  
1.089963399029061e-05  
3.6858665667649396e-06  
9.597162004029466e-06  
5.824231903208722e-06  
1.1693093935943947e-05  
7.938461750153852e-05  
3.7958924344295654e-06  
4.875235650609218e-06  
1.618185321994364e-06  
2.729783110269562e-05  
9.617324109079947e-06  
5.3076478561415136e-06  
7.554201775448936e-06  
4.2683881360578606e-05  
8.07380295577082e-06  
1.7126248694059317e-06  
6.079477126058506e-06  
2.128240946500258e-06  
3.8861173819372286e-05  
7.164078679064249e-06  
2.47117207877034e-05  
1.2823098812106596e-05  
1.714549167012006e-05  
1.8015923950893563e-06  
6.222013287016046e-06  
1.3211677563988615e-06  
9.913356204626259e-06  
3.8631614142802155e-05  
2.2514920820961787e-06  
8.670163401367529e-06  
1.4743466267059759e-06  
0.00018576767496495295  
9.597162004029466e-06  
1.2909887974963496e-06  
4.528037859467908e-06  
6.358119827669521e-06  
5.521525113502478e-05  
4.7330916831286755e-07

9.373149623100031e-07

8.467266935762547e-05

3.740070486864424e-06

1.3533913602134678e-05

1.739964377013324e-06

2.8469193258221737e-06

---
