# Supplementary material for: Novel antibiotic resistance genes from the hospital effluent are disseminated into the marine environment in Norway
Source: bioRxiv or medRxiv preprint supplement (doi:10.1101/2024.09.23.24313887), 2024-09-24
Supplement: Supplementary file [file media-8.pdf]

**Supplementary Table S8:** Assembled known and novel antibiotic resistance genes (ARGs) across all

| <b>Gene name</b>          | <b>Sample type</b> | <b>Resistance against</b> |
|---------------------------|--------------------|---------------------------|
| HiACCLASS_a_sequ16ence    | STP-inf-A          | Betalactams               |
| HiAAMG_B_sequ1ence        | STP-inf-A          | Aminoglycosides           |
| HiAAMG_B_sequ3ence        | STP-inf-A          | Aminoglycosides           |
| HiAAMG_D_sequ1ence        | STP-inf-A          | Aminoglycosides           |
| HiAAMG_E_sequ1ence        | STP-inf-A          | Aminoglycosides           |
| HiAAMG_E_sequ2ence        | STP-inf-A          | Aminoglycosides           |
| HiAAMG_E_sequ7ence        | STP-inf-A          | Aminoglycosides           |
| HiAAMG_G_sequ1ence        | STP-inf-A          | Aminoglycosides           |
| HiAAMG_H_sequ2ence        | STP-inf-A          | Aminoglycosides           |
| HiAAMG_H_sequ3ence        | STP-inf-A          | Aminoglycosides           |
| HiAAMG_H_sequ6ence        | STP-inf-A          | Aminoglycosides           |
| HiAAMG_H_sequ7ence        | STP-inf-A          | Aminoglycosides           |
| HiAAMG_I_sequ3ence        | STP-inf-A          | Aminoglycosides           |
| HiACCLASS_a_sequ12ence    | STP-inf-A          | Betalactams               |
| HiACCLASS_a_sequ14ence    | STP-inf-A          | Betalactams               |
| HiACCLASS_a_sequ19ence    | STP-inf-A          | Betalactams               |
| HiACCLASS_a_sequ1ence     | STP-inf-A          | Betalactams               |
| HiACCLASS_a_sequ20ence    | STP-inf-A          | Betalactams               |
| HiACCLASS_a_sequ21ence    | STP-inf-A          | Betalactams               |
| HiACCLASS_a_sequ32ence    | STP-inf-A          | Betalactams               |
| HiACCLASS_a_sequ37ence    | STP-inf-A          | Betalactams               |
| HiACCLASS_a_sequ4ence     | STP-inf-A          | Betalactams               |
| HiACCLASS_a_sequ5ence     | STP-inf-A          | Betalactams               |
| HiACCLASS_b3_sequ1ence    | STP-inf-A          | Betalactams               |
| HiACCLASS_c_sequ11ence    | STP-inf-A          | Betalactams               |
| HiACCLASS_c_sequ12ence    | STP-inf-A          | Betalactams               |
| HiACCLASS_c_sequ1ence     | STP-inf-A          | Betalactams               |
| HiACCLASS_d2_sequ14ence   | STP-inf-A          | Betalactams               |
| HiACCLASS_d2_sequ16ence   | STP-inf-A          | Betalactams               |
| HiACCLASS_d2_sequ18ence   | STP-inf-A          | Betalactams               |
| HiACCLASS_d2_sequ21ence   | STP-inf-A          | Betalactams               |
| HiACCLASS_d2_sequ22ence   | STP-inf-A          | Betalactams               |
| HiACCLASS_d2_sequ23ence   | STP-inf-A          | Betalactams               |
| HiACCLASS_d2_sequ25ence   | STP-inf-A          | Betalactams               |
| HiACCLASS_d2_sequ30ence   | STP-inf-A          | Betalactams               |
| HiACCLASS_d2_sequ7ence    | STP-inf-A          | Betalactams               |
| HiAERM_ermttype_sequ1ence | STP-inf-A          | Erythromycin              |
| HiAERM_ermttype_sequ1ence | STP-inf-A          | Erythromycin              |
| HiAERM_ermttype_sequ2ence | STP-inf-A          | Erythromycin              |
| HiAERM_ermttype_sequ2ence | STP-inf-A          | Erythromycin              |
| HiAERM_ermttype_sequ3ence | STP-inf-A          | Erythromycin              |
| HiAERM_ermttype_sequ8ence | STP-inf-A          | Erythromycin              |
| HiAMPH_sequ1ence          | STP-inf-A          | Macrolides                |

|                               |           |                 |
|-------------------------------|-----------|-----------------|
| HiAMPH_sequ2ence              | STP-inf-A | Macrolides      |
| HiAMPH_sequ3ence              | STP-inf-A | Macrolides      |
| HiAMPH_sequ4ence              | STP-inf-A | Macrolides      |
| HiApraminoglycosidemodelcSeq1 | STP-inf-A | Aminoglycosides |
| HiAQNR_sequ3ence              | STP-inf-A | Quinolones      |
| HiATET_eff_sequ1ence          | STP-inf-A | Tetracyclines   |
| HiATET_eff_sequ2ence          | STP-inf-A | Tetracyclines   |
| HiATET_enz_sequ1ence          | STP-inf-A | Tetracyclines   |
| HiATET_enz_sequ2ence          | STP-inf-A | Tetracyclines   |
| HiATET_rpg_sequ2ence          | STP-inf-A | Tetracyclines   |
| HiATET_rpg_sequ6ence          | STP-inf-A | Tetracyclines   |
| HiFAMG_B_sequ1ence            | STP-inf-F | Aminoglycosides |
| HiFAMG_B_sequ5ence            | STP-inf-F | Aminoglycosides |
| HiFAMG_C_sequ1ence            | STP-inf-F | Aminoglycosides |
| HiFAMG_D_sequ1ence            | STP-inf-F | Aminoglycosides |
| HiFAMG_D_sequ2ence            | STP-inf-F | Aminoglycosides |
| HiFAMG_E_sequ1ence            | STP-inf-F | Aminoglycosides |
| HiFAMG_E_sequ2ence            | STP-inf-F | Aminoglycosides |
| HiFAMG_E_sequ3ence            | STP-inf-F | Aminoglycosides |
| HiFAMG_E_sequ7ence            | STP-inf-F | Aminoglycosides |
| HiFAMG_G_sequ1ence            | STP-inf-F | Aminoglycosides |
| HiFAMG_G_sequ2ence            | STP-inf-F | Aminoglycosides |
| HiFAMG_H_sequ2ence            | STP-inf-F | Aminoglycosides |
| HiFAMG_H_sequ3ence            | STP-inf-F | Aminoglycosides |
| HiFAMG_H_sequ4ence            | STP-inf-F | Aminoglycosides |
| HiFAMG_I_sequ2ence            | STP-inf-F | Aminoglycosides |
| HiFCLASS_a_sequ13ence         | STP-inf-F | Betalactams     |
| HiFCLASS_a_sequ1ence          | STP-inf-F | Betalactams     |
| HiFCLASS_a_sequ23ence         | STP-inf-F | Betalactams     |
| HiFCLASS_a_sequ25ence         | STP-inf-F | Betalactams     |
| HiFCLASS_a_sequ26ence         | STP-inf-F | Betalactams     |
| HiFCLASS_a_sequ2ence          | STP-inf-F | Betalactams     |
| HiFCLASS_a_sequ33ence         | STP-inf-F | Betalactams     |
| HiFCLASS_a_sequ34ence         | STP-inf-F | Betalactams     |
| HiFCLASS_a_sequ35ence         | STP-inf-F | Betalactams     |
| HiFCLASS_a_sequ41ence         | STP-inf-F | Betalactams     |
| HiFCLASS_a_sequ51ence         | STP-inf-F | Betalactams     |
| HiFCLASS_a_sequ5ence          | STP-inf-F | Betalactams     |
| HiFCLASS_a_sequ7ence          | STP-inf-F | Betalactams     |
| HiFCLASS_b3_sequ1ence         | STP-inf-F | Betalactams     |
| HiFCLASS_b3_sequ2ence         | STP-inf-F | Betalactams     |
| HiFCLASS_b3_sequ3ence         | STP-inf-F | Betalactams     |
| HiFCLASS_c_sequ5ence          | STP-inf-F | Betalactams     |
| HiFCLASS_c_sequ8ence          | STP-inf-F | Betalactams     |
| HiFCLASS_d2_sequ11ence        | STP-inf-F | Betalactams     |
| HiFCLASS_d2_sequ13ence        | STP-inf-F | Betalactams     |

|                            |             |                 |
|----------------------------|-------------|-----------------|
| HiFCLASS_d2_sequ17ence     | STP-inf-F   | Betalactams     |
| HiFCLASS_d2_sequ20ence     | STP-inf-F   | Betalactams     |
| HiFCLASS_d2_sequ22ence     | STP-inf-F   | Betalactams     |
| HiFCLASS_d2_sequ24ence     | STP-inf-F   | Betalactams     |
| HiFCLASS_d2_sequ25ence     | STP-inf-F   | Betalactams     |
| HiFCLASS_d2_sequ26ence     | STP-inf-F   | Betalactams     |
| HiFCLASS_d2_sequ29ence     | STP-inf-F   | Betalactams     |
| HiFCLASS_d2_sequ30ence     | STP-inf-F   | Betalactams     |
| HiFCLASS_d2_sequ31ence     | STP-inf-F   | Betalactams     |
| HiFERM_ermtyp_e_sequ10ence | STP-inf-F   | Erythromycin    |
| HiFERM_ermtyp_e_sequ12ence | STP-inf-F   | Erythromycin    |
| HiFERM_ermtyp_e_sequ1ence  | STP-inf-F   | Erythromycin    |
| HiFERM_ermtyp_e_sequ1ence  | STP-inf-F   | Erythromycin    |
| HiFERM_ermtyp_e_sequ2ence  | STP-inf-F   | Erythromycin    |
| HiFERM_ermtyp_e_sequ3ence  | STP-inf-F   | Erythromycin    |
| HiFERM_ermtyp_e_sequ4ence  | STP-inf-F   | Erythromycin    |
| HiFERM_ermtyp_e_sequ5ence  | STP-inf-F   | Erythromycin    |
| HiFERM_ermtyp_e_sequ6ence  | STP-inf-F   | Erythromycin    |
| HiFERM_ermtyp_e_sequ8ence  | STP-inf-F   | Erythromycin    |
| HiFMPH_sequ1ence           | STP-inf-F   | Macrolides      |
| HiFMPH_sequ2ence           | STP-inf-F   | Macrolides      |
| HiFMPH_sequ4ence           | STP-inf-F   | Macrolides      |
| HiFMPH_sequ6ence           | STP-inf-F   | Macrolides      |
| HiFQNR_sequ1ence           | STP-inf-F   | Quinolones      |
| HiFQNR_sequ4ence           | STP-inf-F   | Quinolones      |
| HiFTET_eff_sequ1ence       | STP-inf-F   | Tetracyclines   |
| HiFTET_eff_sequ2ence       | STP-inf-F   | Tetracyclines   |
| HiFTET_enz_sequ1ence       | STP-inf-F   | Tetracyclines   |
| HiFTET_enz_sequ2ence       | STP-inf-F   | Tetracyclines   |
| HiFTET_enz_sequ3ence       | STP-inf-F   | Tetracyclines   |
| HiFTET_rpg_sequ2ence       | STP-inf-F   | Tetracyclines   |
| HiFTET_rpg_sequ3ence       | STP-inf-F   | Tetracyclines   |
| HiFTET_rpg_sequ4ence       | STP-inf-F   | Tetracyclines   |
| HiFTET_rpg_sequ7ence       | STP-inf-F   | Tetracyclines   |
| HiFTET_rpg_sequ8ence       | STP-inf-F   | Tetracyclines   |
| HiFTET_rpg_sequ9ence       | STP-inf-F   | Tetracyclines   |
| HoAAMG_B_sequ1ence         | STP-T-eff-A | Aminoglycosides |
| HoAAMG_B_sequ2ence         | STP-T-eff-A | Aminoglycosides |
| HoAAMG_C_sequ1ence         | STP-T-eff-A | Aminoglycosides |
| HoAAMG_D_sequ1ence         | STP-T-eff-A | Aminoglycosides |
| HoAAMG_D_sequ2ence         | STP-T-eff-A | Aminoglycosides |
| HoAAMG_E_sequ1ence         | STP-T-eff-A | Aminoglycosides |
| HoAAMG_E_sequ4ence         | STP-T-eff-A | Aminoglycosides |
| HoAAMG_E_sequ5ence         | STP-T-eff-A | Aminoglycosides |
| HoAAMG_E_sequ8ence         | STP-T-eff-A | Aminoglycosides |
| HoAAMG_E_sequ9ence         | STP-T-eff-A | Aminoglycosides |

|                          |             |                 |
|--------------------------|-------------|-----------------|
| HoAAMG_G_sequ1ence       | STP-T-eff-A | Aminoglycosides |
| HoAAMG_G_sequ2ence       | STP-T-eff-A | Aminoglycosides |
| HoAAMG_H_sequ1ence       | STP-T-eff-A | Aminoglycosides |
| HoAAMG_H_sequ5ence       | STP-T-eff-A | Aminoglycosides |
| HoAAMG_H_sequ7ence       | STP-T-eff-A | Aminoglycosides |
| HoAAMG_H_sequ8ence       | STP-T-eff-A | Aminoglycosides |
| HoAAMG_I_sequ4ence       | STP-T-eff-A | Aminoglycosides |
| HoAClass_a_sequ14ence    | STP-T-eff-A | Betalactams     |
| HoAClass_a_sequ19ence    | STP-T-eff-A | Betalactams     |
| HoAClass_a_sequ1ence     | STP-T-eff-A | Betalactams     |
| HoAClass_a_sequ23ence    | STP-T-eff-A | Betalactams     |
| HoAClass_a_sequ30ence    | STP-T-eff-A | Betalactams     |
| HoAClass_a_sequ41ence    | STP-T-eff-A | Betalactams     |
| HoAClass_a_sequ43ence    | STP-T-eff-A | Betalactams     |
| HoAClass_a_sequ44ence    | STP-T-eff-A | Betalactams     |
| HoAClass_a_sequ48ence    | STP-T-eff-A | Betalactams     |
| HoAClass_a_sequ4ence     | STP-T-eff-A | Betalactams     |
| HoAClass_a_sequ52ence    | STP-T-eff-A | Betalactams     |
| HoAClass_a_sequ55ence    | STP-T-eff-A | Betalactams     |
| HoAClass_a_sequ57ence    | STP-T-eff-A | Betalactams     |
| HoAClass_a_sequ60ence    | STP-T-eff-A | Betalactams     |
| HoAClass_a_sequ61ence    | STP-T-eff-A | Betalactams     |
| HoAClass_a_sequ65ence    | STP-T-eff-A | Betalactams     |
| HoAClass_a_sequ67ence    | STP-T-eff-A | Betalactams     |
| HoAClass_a_sequ73ence    | STP-T-eff-A | Betalactams     |
| HoAClass_a_sequ76ence    | STP-T-eff-A | Betalactams     |
| HoAClass_a_sequ77ence    | STP-T-eff-A | Betalactams     |
| HoAClass_b3_sequ3ence    | STP-T-eff-A | Betalactams     |
| HoAClass_b3_sequ5ence    | STP-T-eff-A | Betalactams     |
| HoAClass_c_sequ3ence     | STP-T-eff-A | Betalactams     |
| HoAClass_c_sequ4ence     | STP-T-eff-A | Betalactams     |
| HoAClass_d1_sequ4ence    | STP-T-eff-A | Betalactams     |
| HoAClass_d2_sequ13ence   | STP-T-eff-A | Betalactams     |
| HoAClass_d2_sequ24ence   | STP-T-eff-A | Betalactams     |
| HoAClass_d2_sequ27ence   | STP-T-eff-A | Betalactams     |
| HoAClass_d2_sequ32ence   | STP-T-eff-A | Betalactams     |
| HoAClass_d2_sequ37ence   | STP-T-eff-A | Betalactams     |
| HoAClass_d2_sequ41ence   | STP-T-eff-A | Betalactams     |
| HoAClass_d2_sequ49ence   | STP-T-eff-A | Betalactams     |
| HoAClass_d2_sequ51ence   | STP-T-eff-A | Betalactams     |
| HoAClass_d2_sequ52ence   | STP-T-eff-A | Betalactams     |
| HoAClass_d2_sequ7ence    | STP-T-eff-A | Betalactams     |
| HoAClass_d2_sequ9ence    | STP-T-eff-A | Betalactams     |
| HoAERM_ermtyp_sequ12ence | STP-T-eff-A | Erythromycin    |
| HoAERM_ermtyp_sequ13ence | STP-T-eff-A | Erythromycin    |
| HoAERM_ermtyp_sequ1ence  | STP-T-eff-A | Erythromycin    |

|                           |             |                 |
|---------------------------|-------------|-----------------|
| HoAERM_ermtyp_e_sequ1ence | STP-T-eff-A | Erythromycin    |
| HoAERM_ermtyp_e_sequ2ence | STP-T-eff-A | Erythromycin    |
| HoAERM_ermtyp_e_sequ3ence | STP-T-eff-A | Erythromycin    |
| HoAERM_ermtyp_e_sequ5ence | STP-T-eff-A | Erythromycin    |
| HoAERM_ermtyp_e_sequ5ence | STP-T-eff-A | Erythromycin    |
| HoAERM_ermtyp_e_sequ7ence | STP-T-eff-A | Erythromycin    |
| HoAERM_ermtyp_e_sequ8ence | STP-T-eff-A | Erythromycin    |
| HoAERM_ermtyp_e_sequ9ence | STP-T-eff-A | Erythromycin    |
| HoAMPH_sequ1ence          | STP-T-eff-A | Macrolides      |
| HoAMPH_sequ2ence          | STP-T-eff-A | Macrolides      |
| HoAMPH_sequ5ence          | STP-T-eff-A | Macrolides      |
| HoAQNR_sequ2ence          | STP-T-eff-A | Quinolones      |
| HoATET_eff_sequ1ence      | STP-T-eff-A | Tetracyclines   |
| HoATET_eff_sequ2ence      | STP-T-eff-A | Tetracyclines   |
| HoATET_eff_sequ4ence      | STP-T-eff-A | Tetracyclines   |
| HoATET_enz_sequ1ence      | STP-T-eff-A | Tetracyclines   |
| HoATET_enz_sequ2ence      | STP-T-eff-A | Tetracyclines   |
| HoATET_rpg_sequ11ence     | STP-T-eff-A | Tetracyclines   |
| HoATET_rpg_sequ3ence      | STP-T-eff-A | Tetracyclines   |
| HoATET_rpg_sequ7ence      | STP-T-eff-A | Tetracyclines   |
| HoATET_rpg_sequ8ence      | STP-T-eff-A | Tetracyclines   |
| HoFAMG_B_sequ1ence        | STP-T-eff-F | Aminoglycosides |
| HoFAMG_B_sequ2ence        | STP-T-eff-F | Aminoglycosides |
| HoFAMG_C_sequ1ence        | STP-T-eff-F | Aminoglycosides |
| HoFAMG_D_sequ4ence        | STP-T-eff-F | Aminoglycosides |
| HoFAMG_E_sequ1ence        | STP-T-eff-F | Aminoglycosides |
| HoFAMG_E_sequ2ence        | STP-T-eff-F | Aminoglycosides |
| HoFAMG_E_sequ4ence        | STP-T-eff-F | Aminoglycosides |
| HoFAMG_E_sequ5ence        | STP-T-eff-F | Aminoglycosides |
| HoFAMG_G_sequ1ence        | STP-T-eff-F | Aminoglycosides |
| HoFAMG_H_sequ1ence        | STP-T-eff-F | Aminoglycosides |
| HoFAMG_H_sequ2ence        | STP-T-eff-F | Aminoglycosides |
| HoFAMG_I_sequ5ence        | STP-T-eff-F | Aminoglycosides |
| HoFCLASS_a_sequ12ence     | STP-T-eff-F | Betalactams     |
| HoFCLASS_a_sequ19ence     | STP-T-eff-F | Betalactams     |
| HoFCLASS_a_sequ25ence     | STP-T-eff-F | Betalactams     |
| HoFCLASS_a_sequ2ence      | STP-T-eff-F | Betalactams     |
| HoFCLASS_a_sequ46ence     | STP-T-eff-F | Betalactams     |
| HoFCLASS_a_sequ47ence     | STP-T-eff-F | Betalactams     |
| HoFCLASS_a_sequ49ence     | STP-T-eff-F | Betalactams     |
| HoFCLASS_a_sequ57ence     | STP-T-eff-F | Betalactams     |
| HoFCLASS_a_sequ5ence      | STP-T-eff-F | Betalactams     |
| HoFCLASS_a_sequ60ence     | STP-T-eff-F | Betalactams     |
| HoFCLASS_a_sequ7ence      | STP-T-eff-F | Betalactams     |
| HoFCLASS_b3_sequ2ence     | STP-T-eff-F | Betalactams     |
| HoFCLASS_c_sequ5ence      | STP-T-eff-F | Betalactams     |

|                         |                |                 |
|-------------------------|----------------|-----------------|
| HoFCLASS_d1_sequ2ence   | STP-T-eff-F    | Betalactams     |
| HoFCLASS_d2_sequ13ence  | STP-T-eff-F    | Betalactams     |
| HoFCLASS_d2_sequ14ence  | STP-T-eff-F    | Betalactams     |
| HoFCLASS_d2_sequ17ence  | STP-T-eff-F    | Betalactams     |
| HoFCLASS_d2_sequ19ence  | STP-T-eff-F    | Betalactams     |
| HoFCLASS_d2_sequ21ence  | STP-T-eff-F    | Betalactams     |
| HoFCLASS_d2_sequ29ence  | STP-T-eff-F    | Betalactams     |
| HoFCLASS_d2_sequ34ence  | STP-T-eff-F    | Betalactams     |
| HoFCLASS_d2_sequ4ence   | STP-T-eff-F    | Betalactams     |
| HoFCLASS_d2_sequ8ence   | STP-T-eff-F    | Betalactams     |
| HoFERM_ermtyp_sequ1ence | STP-T-eff-F    | Erythromycin    |
| HoFERM_ermtyp_sequ3ence | STP-T-eff-F    | Erythromycin    |
| HoFERM_ermtyp_sequ4ence | STP-T-eff-F    | Erythromycin    |
| HoFERM_ermtyp_sequ5ence | STP-T-eff-F    | Erythromycin    |
| HoFERM_ermtyp_sequ7ence | STP-T-eff-F    | Erythromycin    |
| HoFERM_ermtyp_sequ8ence | STP-T-eff-F    | Erythromycin    |
| HoFMPH_sequ1ence        | STP-T-eff-F    | Macrolides      |
| HoFMPH_sequ2ence        | STP-T-eff-F    | Macrolides      |
| HoFMPH_sequ4ence        | STP-T-eff-F    | Macrolides      |
| HoFTET_eff_sequ2ence    | STP-T-eff-F    | Tetracyclines   |
| HoFTET_eff_sequ3ence    | STP-T-eff-F    | Tetracyclines   |
| HoFTET_enz_sequ1ence    | STP-T-eff-F    | Tetracyclines   |
| HoFTET_enz_sequ2ence    | STP-T-eff-F    | Tetracyclines   |
| HoFTET_rpg_sequ3ence    | STP-T-eff-F    | Tetracyclines   |
| HoFTET_rpg_sequ5ence    | STP-T-eff-F    | Tetracyclines   |
| SeAAMG_B_sequ2ence      | Hospital-eff-A | Aminoglycosides |
| SeAAMG_B_sequ3ence      | Hospital-eff-A | Aminoglycosides |
| SeAAMG_C_sequ1ence      | Hospital-eff-A | Aminoglycosides |
| SeAAMG_D_sequ4ence      | Hospital-eff-A | Aminoglycosides |
| SeAAMG_E_sequ11ence     | Hospital-eff-A | Aminoglycosides |
| SeAAMG_E_sequ2ence      | Hospital-eff-A | Aminoglycosides |
| SeAAMG_E_sequ4ence      | Hospital-eff-A | Aminoglycosides |
| SeAAMG_E_sequ5ence      | Hospital-eff-A | Aminoglycosides |
| SeAAMG_E_sequ6ence      | Hospital-eff-A | Aminoglycosides |
| SeAAMG_F_sequ1ence      | Hospital-eff-A | Aminoglycosides |
| SeAAMG_G_sequ1ence      | Hospital-eff-A | Aminoglycosides |
| SeAAMG_H_sequ1ence      | Hospital-eff-A | Aminoglycosides |
| SeAAMG_H_sequ4ence      | Hospital-eff-A | Aminoglycosides |
| SeAAMG_H_sequ5ence      | Hospital-eff-A | Aminoglycosides |
| SeAAMG_H_sequ7ence      | Hospital-eff-A | Aminoglycosides |
| SeAAMG_H_sequ8ence      | Hospital-eff-A | Aminoglycosides |
| SeAClass_a_sequ11ence   | Hospital-eff-A | Betalactams     |
| SeAClass_a_sequ13ence   | Hospital-eff-A | Betalactams     |
| SeAClass_a_sequ14ence   | Hospital-eff-A | Betalactams     |
| SeAClass_a_sequ16ence   | Hospital-eff-A | Betalactams     |
| SeAClass_a_sequ17ence   | Hospital-eff-A | Betalactams     |

|                          |                |                 |
|--------------------------|----------------|-----------------|
| SeAClass_a_sequ1ence     | Hospital-eff-A | Betalactams     |
| SeAClass_a_sequ20ence    | Hospital-eff-A | Betalactams     |
| SeAClass_a_sequ23ence    | Hospital-eff-A | Betalactams     |
| SeAClass_a_sequ24ence    | Hospital-eff-A | Betalactams     |
| SeAClass_a_sequ29ence    | Hospital-eff-A | Betalactams     |
| SeAClass_a_sequ3ence     | Hospital-eff-A | Betalactams     |
| SeAClass_a_sequ42ence    | Hospital-eff-A | Betalactams     |
| SeAClass_a_sequ5ence     | Hospital-eff-A | Betalactams     |
| SeAClass_a_sequ8ence     | Hospital-eff-A | Betalactams     |
| SeAClass_b12_sequ2ence   | Hospital-eff-A | Betalactams     |
| SeAClass_b12_sequ5ence   | Hospital-eff-A | Betalactams     |
| SeAClass_b3_sequ2ence    | Hospital-eff-A | Betalactams     |
| SeAClass_c_sequ11ence    | Hospital-eff-A | Betalactams     |
| SeAClass_c_sequ12ence    | Hospital-eff-A | Betalactams     |
| SeAClass_c_sequ7ence     | Hospital-eff-A | Betalactams     |
| SeAClass_d1_sequ2ence    | Hospital-eff-A | Betalactams     |
| SeAClass_d1_sequ3ence    | Hospital-eff-A | Betalactams     |
| SeAClass_d1_sequ4ence    | Hospital-eff-A | Betalactams     |
| SeAClass_d2_sequ13ence   | Hospital-eff-A | Betalactams     |
| SeAClass_d2_sequ17ence   | Hospital-eff-A | Betalactams     |
| SeAClass_d2_sequ18ence   | Hospital-eff-A | Betalactams     |
| SeAClass_d2_sequ1ence    | Hospital-eff-A | Betalactams     |
| SeAClass_d2_sequ2ence    | Hospital-eff-A | Betalactams     |
| SeAClass_d2_sequ5ence    | Hospital-eff-A | Betalactams     |
| SeAERM_ermtype_sequ1ence | Hospital-eff-A | Erythromycin    |
| SeAERM_ermtype_sequ1ence | Hospital-eff-A | Erythromycin    |
| SeAERM_ermtype_sequ3ence | Hospital-eff-A | Erythromycin    |
| SeAERM_ermtype_sequ4ence | Hospital-eff-A | Erythromycin    |
| SeAERM_ermtype_sequ7ence | Hospital-eff-A | Erythromycin    |
| SeAERM_ermtype_sequ8ence | Hospital-eff-A | Erythromycin    |
| SeAMPH_sequ1ence         | Hospital-eff-A | Macrolides      |
| SeAMPH_sequ2ence         | Hospital-eff-A | Macrolides      |
| SeAMPH_sequ3ence         | Hospital-eff-A | Macrolides      |
| SeAMPH_sequ4ence         | Hospital-eff-A | Macrolides      |
| SeAMPH_sequ5ence         | Hospital-eff-A | Macrolides      |
| SeAQNR_sequ2ence         | Hospital-eff-A | Quinolones      |
| SeATET_eff_sequ4ence     | Hospital-eff-A | Tetracyclines   |
| SeATET_eff_sequ5ence     | Hospital-eff-A | Tetracyclines   |
| SeATET_eff_sequ6ence     | Hospital-eff-A | Tetracyclines   |
| SeATET_enz_sequ1ence     | Hospital-eff-A | Tetracyclines   |
| SeATET_rpg_sequ4ence     | Hospital-eff-A | Tetracyclines   |
| SeFAMG_B_sequ1ence       | Hospital-eff-F | Aminoglycosides |
| SeFAMG_B_sequ5ence       | Hospital-eff-F | Aminoglycosides |
| SeFAMG_C_sequ2ence       | Hospital-eff-F | Aminoglycosides |
| SeFAMG_D_sequ1ence       | Hospital-eff-F | Aminoglycosides |
| SeFAMG_D_sequ5ence       | Hospital-eff-F | Aminoglycosides |

|                        |                |                 |
|------------------------|----------------|-----------------|
| SeFAMG_E_sequ11ence    | Hospital-eff-F | Aminoglycosides |
| SeFAMG_E_sequ12ence    | Hospital-eff-F | Aminoglycosides |
| SeFAMG_E_sequ13ence    | Hospital-eff-F | Aminoglycosides |
| SeFAMG_E_sequ14ence    | Hospital-eff-F | Aminoglycosides |
| SeFAMG_E_sequ1ence     | Hospital-eff-F | Aminoglycosides |
| SeFAMG_E_sequ2ence     | Hospital-eff-F | Aminoglycosides |
| SeFAMG_F_sequ1ence     | Hospital-eff-F | Aminoglycosides |
| SeFAMG_G_sequ1ence     | Hospital-eff-F | Aminoglycosides |
| SeFAMG_H_sequ12ence    | Hospital-eff-F | Aminoglycosides |
| SeFAMG_H_sequ3ence     | Hospital-eff-F | Aminoglycosides |
| SeFAMG_H_sequ6ence     | Hospital-eff-F | Aminoglycosides |
| SeFAMG_H_sequ7ence     | Hospital-eff-F | Aminoglycosides |
| SeFAMG_H_sequ8ence     | Hospital-eff-F | Aminoglycosides |
| SeFCLASS_a_sequ11ence  | Hospital-eff-F | Betalactams     |
| SeFCLASS_a_sequ12ence  | Hospital-eff-F | Betalactams     |
| SeFCLASS_a_sequ15ence  | Hospital-eff-F | Betalactams     |
| SeFCLASS_a_sequ16ence  | Hospital-eff-F | Betalactams     |
| SeFCLASS_a_sequ20ence  | Hospital-eff-F | Betalactams     |
| SeFCLASS_a_sequ22ence  | Hospital-eff-F | Betalactams     |
| SeFCLASS_a_sequ28ence  | Hospital-eff-F | Betalactams     |
| SeFCLASS_a_sequ36ence  | Hospital-eff-F | Betalactams     |
| SeFCLASS_a_sequ37ence  | Hospital-eff-F | Betalactams     |
| SeFCLASS_a_sequ38ence  | Hospital-eff-F | Betalactams     |
| SeFCLASS_a_sequ3ence   | Hospital-eff-F | Betalactams     |
| SeFCLASS_a_sequ43ence  | Hospital-eff-F | Betalactams     |
| SeFCLASS_a_sequ52ence  | Hospital-eff-F | Betalactams     |
| SeFCLASS_a_sequ53ence  | Hospital-eff-F | Betalactams     |
| SeFCLASS_a_sequ54ence  | Hospital-eff-F | Betalactams     |
| SeFCLASS_a_sequ56ence  | Hospital-eff-F | Betalactams     |
| SeFCLASS_a_sequ61ence  | Hospital-eff-F | Betalactams     |
| SeFCLASS_a_sequ62ence  | Hospital-eff-F | Betalactams     |
| SeFCLASS_a_sequ64ence  | Hospital-eff-F | Betalactams     |
| SeFCLASS_a_sequ65ence  | Hospital-eff-F | Betalactams     |
| SeFCLASS_a_sequ67ence  | Hospital-eff-F | Betalactams     |
| SeFCLASS_a_sequ8ence   | Hospital-eff-F | Betalactams     |
| SeFCLASS_b12_sequ1ence | Hospital-eff-F | Betalactams     |
| SeFCLASS_b12_sequ2ence | Hospital-eff-F | Betalactams     |
| SeFCLASS_b3_sequ3ence  | Hospital-eff-F | Betalactams     |
| SeFCLASS_b3_sequ5ence  | Hospital-eff-F | Betalactams     |
| SeFCLASS_b3_sequ7ence  | Hospital-eff-F | Betalactams     |
| SeFCLASS_c_sequ13ence  | Hospital-eff-F | Betalactams     |
| SeFCLASS_c_sequ4ence   | Hospital-eff-F | Betalactams     |
| SeFCLASS_d1_sequ1ence  | Hospital-eff-F | Betalactams     |
| SeFCLASS_d1_sequ2ence  | Hospital-eff-F | Betalactams     |
| SeFCLASS_d1_sequ5ence  | Hospital-eff-F | Betalactams     |
| SeFCLASS_d1_sequ6ence  | Hospital-eff-F | Betalactams     |



|                          |                |                 |
|--------------------------|----------------|-----------------|
| SeFCLASS_d2_sequ15ence   | Hospital-eff-F | Betalactams     |
| SeFCLASS_d2_sequ21ence   | Hospital-eff-F | Betalactams     |
| SeFCLASS_d2_sequ22ence   | Hospital-eff-F | Betalactams     |
| SeFCLASS_d2_sequ26ence   | Hospital-eff-F | Betalactams     |
| SeFCLASS_d2_sequ27ence   | Hospital-eff-F | Betalactams     |
| SeFCLASS_d2_sequ28ence   | Hospital-eff-F | Betalactams     |
| SeFCLASS_d2_sequ29ence   | Hospital-eff-F | Betalactams     |
| SeFCLASS_d2_sequ2ence    | Hospital-eff-F | Betalactams     |
| SeFCLASS_d2_sequ4ence    | Hospital-eff-F | Betalactams     |
| SeFCLASS_d2_sequ5ence    | Hospital-eff-F | Betalactams     |
| SeFERM_ermtyp_sequ12ence | Hospital-eff-F | Erythromycin    |
| SeFERM_ermtyp_sequ13ence | Hospital-eff-F | Erythromycin    |
| SeFERM_ermtyp_sequ1ence  | Hospital-eff-F | Erythromycin    |
| SeFERM_ermtyp_sequ1ence  | Hospital-eff-F | Erythromycin    |
| SeFERM_ermtyp_sequ2ence  | Hospital-eff-F | Erythromycin    |
| SeFERM_ermtyp_sequ3ence  | Hospital-eff-F | Erythromycin    |
| SeFERM_ermtyp_sequ5ence  | Hospital-eff-F | Erythromycin    |
| SeFERM_ermtyp_sequ7ence  | Hospital-eff-F | Erythromycin    |
| SeFERM_ermtyp_sequ8ence  | Hospital-eff-F | Erythromycin    |
| SeFERM_ermtyp_sequ9ence  | Hospital-eff-F | Erythromycin    |
| SeFMPH_sequ2ence         | Hospital-eff-F | Macrolides      |
| SeFMPH_sequ3ence         | Hospital-eff-F | Macrolides      |
| SeFMPH_sequ4ence         | Hospital-eff-F | Macrolides      |
| SeFQNR_sequ1ence         | Hospital-eff-F | Quinolones      |
| SeFQNR_sequ2ence         | Hospital-eff-F | Quinolones      |
| SeFQNR_sequ6ence         | Hospital-eff-F | Quinolones      |
| SeFTET_eff_sequ6ence     | Hospital-eff-F | Tetracyclines   |
| SeFTET_eff_sequ7ence     | Hospital-eff-F | Tetracyclines   |
| SeFTET_eff_sequ8ence     | Hospital-eff-F | Tetracyclines   |
| SeFTET_enz_sequ1ence     | Hospital-eff-F | Tetracyclines   |
| SeFTET_enz_sequ2ence     | Hospital-eff-F | Tetracyclines   |
| SeFTET_rpg_sequ1ence     | Hospital-eff-F | Tetracyclines   |
| SeFTET_rpg_sequ6ence     | Hospital-eff-F | Tetracyclines   |
| HiAAMG_G_sequ2ence       | STP-inf-A      | Aminoglycosides |
| SeFAMG_E_sequ6ence       | Hospital-eff-F | Aminoglycosides |
| HiACCLASS_a_sequ17ence   | STP-inf-A      | Betalactams     |
| HiACCLASS_a_sequ24ence   | STP-inf-A      | Betalactams     |
| HiACCLASS_a_sequ25ence   | STP-inf-A      | Betalactams     |
| HiACCLASS_a_sequ26ence   | STP-inf-A      | Betalactams     |
| HiACCLASS_a_sequ27ence   | STP-inf-A      | Betalactams     |
| HiACCLASS_a_sequ28ence   | STP-inf-A      | Betalactams     |
| HiACCLASS_a_sequ30ence   | STP-inf-A      | Betalactams     |
| HoAAMG_E_sequ6ence       | STP-T-eff-A    | Aminoglycosides |
| HiACCLASS_a_sequ31ence   | STP-inf-A      | Betalactams     |
| HiACCLASS_a_sequ35ence   | STP-inf-A      | Betalactams     |
| HiACCLASS_a_sequ41ence   | STP-inf-A      | Betalactams     |

|                         |                |                 |
|-------------------------|----------------|-----------------|
| HiACCLASS_a_sequ8ence   | STP-inf-A      | Betalactams     |
| HiACCLASS_b12_sequ3ence | STP-inf-A      | Betalactams     |
| HiACCLASS_b12_sequ5ence | STP-inf-A      | Betalactams     |
| HiACCLASS_c_sequ3ence   | STP-inf-A      | Betalactams     |
| HiACCLASS_c_sequ5ence   | STP-inf-A      | Betalactams     |
| HiACCLASS_d1_sequ2ence  | STP-inf-A      | Betalactams     |
| HiACCLASS_d2_sequ10ence | STP-inf-A      | Betalactams     |
| HiACCLASS_d2_sequ13ence | STP-inf-A      | Betalactams     |
| HoFAMG_I_sequ2ence      | STP-T-eff-F    | Aminoglycosides |
| HiACCLASS_d2_sequ15ence | STP-inf-A      | Betalactams     |
| HiACCLASS_d2_sequ26ence | STP-inf-A      | Betalactams     |
| HiACCLASS_d2_sequ27ence | STP-inf-A      | Betalactams     |
| SeAAMG_E_sequ3ence      | Hospital-eff-A | Aminoglycosides |
| SeFAMG_E_sequ17ence     | Hospital-eff-F | Aminoglycosides |
| HoAMPH_sequ6ence        | STP-T-eff-A    | Aminoglycosides |
| HiACCLASS_d2_sequ28ence | STP-inf-A      | Betalactams     |
| HiACCLASS_d2_sequ31ence | STP-inf-A      | Betalactams     |
| HiACCLASS_d2_sequ3ence  | STP-inf-A      | Betalactams     |
| SeFAMG_E_sequ16ence     | Hospital-eff-F | Aminoglycosides |
| HiAAMG_H_sequ4ence      | STP-inf-A      | Aminoglycosides |
| HoAAMG_H_sequ3ence      | STP-T-eff-A    | Aminoglycosides |
| HiFAMG_I_sequ4ence      | STP-inf-F      | Aminoglycosides |
| HiACCLASS_d2_sequ4ence  | STP-inf-A      | Betalactams     |
| HiACCLASS_d2_sequ5ence  | STP-inf-A      | Betalactams     |
| HoAAMG_B_sequ6ence      | STP-T-eff-A    | Aminoglycosides |
| HiACCLASS_d2_sequ6ence  | STP-inf-A      | Betalactams     |
| SeFAMG_H_sequ9ence      | Hospital-eff-F | Aminoglycosides |
| HiACCLASS_d2_sequ9ence  | STP-inf-A      | Betalactams     |
| HiFCLASS_a_sequ11ence   | STP-inf-F      | Betalactams     |
| HiFCLASS_a_sequ14ence   | STP-inf-F      | Betalactams     |
| HoAAMG_I_sequ5ence      | STP-T-eff-A    | Aminoglycosides |
| HiFCLASS_a_sequ18ence   | STP-inf-F      | Betalactams     |
| HiFCLASS_a_sequ29ence   | STP-inf-F      | Betalactams     |
| HiFCLASS_a_sequ30ence   | STP-inf-F      | Betalactams     |
| HiFCLASS_a_sequ36ence   | STP-inf-F      | Betalactams     |
| HiFCLASS_a_sequ38ence   | STP-inf-F      | Betalactams     |
| HiFCLASS_a_sequ40ence   | STP-inf-F      | Betalactams     |
| HiFCLASS_a_sequ42ence   | STP-inf-F      | Betalactams     |
| HiFAMG_E_sequ8ence      | STP-inf-F      | Aminoglycosides |
| HoAAMG_I_sequ8ence      | STP-T-eff-A    | Aminoglycosides |
| HoFAMG_I_sequ7ence      | STP-T-eff-F    | Aminoglycosides |
| HiAAMG_I_sequ7ence      | STP-inf-A      | Aminoglycosides |
| HiFCLASS_a_sequ48ence   | STP-inf-F      | Betalactams     |
| SeFAMG_I_sequ4ence      | Hospital-eff-F | Aminoglycosides |
| HiFCLASS_a_sequ49ence   | STP-inf-F      | Betalactams     |
| HiFCLASS_a_sequ56ence   | STP-inf-F      | Betalactams     |

|                           |                |                 |
|---------------------------|----------------|-----------------|
| HiFCLASS_a_sequ9ence      | STP-inf-F      | Betalactams     |
| HiFCLASS_b12_sequ1ence    | STP-inf-F      | Betalactams     |
| HiFCLASS_b12_sequ4ence    | STP-inf-F      | Betalactams     |
| HiFCLASS_b12_sequ5ence    | STP-inf-F      | Betalactams     |
| HiFCLASS_b12_sequ6ence    | STP-inf-F      | Betalactams     |
| HiFCLASS_c_sequ10ence     | STP-inf-F      | Betalactams     |
| HiFCLASS_c_sequ11ence     | STP-inf-F      | Betalactams     |
| HiAAMG_H_sequ9ence        | STP-inf-A      | Aminoglycosides |
| HiFCLASS_c_sequ1ence      | STP-inf-F      | Betalactams     |
| HiFCLASS_d2_sequ14ence    | STP-inf-F      | Betalactams     |
| HiFCLASS_d2_sequ15ence    | STP-inf-F      | Betalactams     |
| HiFCLASS_d2_sequ16ence    | STP-inf-F      | Betalactams     |
| HoAAMG_H_sequ6ence        | STP-T-eff-A    | Aminoglycosides |
| HoAAMG_H_sequ2ence        | STP-T-eff-A    | Aminoglycosides |
| HiFCLASS_d2_sequ21ence    | STP-inf-F      | Betalactams     |
| HiFCLASS_d2_sequ23ence    | STP-inf-F      | Betalactams     |
| HiFCLASS_d2_sequ27ence    | STP-inf-F      | Betalactams     |
| SeFAMG_H_sequ13ence       | Hospital-eff-F | Aminoglycosides |
| HiFCLASS_d2_sequ28ence    | STP-inf-F      | Betalactams     |
| HiFCLASS_d2_sequ2ence     | STP-inf-F      | Betalactams     |
| HiFCLASS_d2_sequ32ence    | STP-inf-F      | Betalactams     |
| HiFCLASS_d2_sequ4ence     | STP-inf-F      | Betalactams     |
| HoAAMG_I_sequ6ence        | STP-T-eff-A    | Aminoglycosides |
| HiFCLASS_d2_sequ5ence     | STP-inf-F      | Betalactams     |
| HiFCLASS_d2_sequ9ence     | STP-inf-F      | Betalactams     |
| HiFCLASS_d2_sequ9ence     | STP-inf-F      | Betalactams     |
| HoACCLASS_a_sequ10ence    | STP-T-eff-A    | Betalactams     |
| HoACCLASS_a_sequ11ence    | STP-T-eff-A    | Betalactams     |
| HoACCLASS_a_sequ13ence    | STP-T-eff-A    | Betalactams     |
| HiAAMG_H_sequ1ence        | STP-inf-A      | Aminoglycosides |
| HiFAMG_A_sequ1ence        | STP-inf-F      | Aminoglycosides |
| HiFAMG_A_sequ3ence        | STP-inf-F      | Aminoglycosides |
| HoACCLASS_a_sequ16ence    | STP-T-eff-A    | Betalactams     |
| HoACCLASS_a_sequ17ence    | STP-T-eff-A    | Betalactams     |
| SeAAMG_H_sequ9ence        | Hospital-eff-A | Aminoglycosides |
| SeAAMG_E_sequ8ence        | Hospital-eff-A | Aminoglycosides |
| SeAAMG_I_sequ4ence        | Hospital-eff-A | Aminoglycosides |
| HoACCLASS_a_sequ20ence    | STP-T-eff-A    | Betalactams     |
| SeFAMG_I_sequ5ence        | Hospital-eff-F | Aminoglycosides |
| HoACCLASS_a_sequ21ence    | STP-T-eff-A    | Betalactams     |
| SeAERM_ermttype_sequ2ence | Hospital-eff-A | Erythromycin    |
| SeFERM_ermttype_sequ2ence | Hospital-eff-F | Erythromycin    |
| SeAAMG_D_sequ1ence        | Hospital-eff-A | Aminoglycosides |
| SeFAMG_D_sequ2ence        | Hospital-eff-F | Aminoglycosides |
| HiAAMG_I_sequ4ence        | STP-inf-A      | Aminoglycosides |
| HoACCLASS_a_sequ22ence    | STP-T-eff-A    | Betalactams     |

|                               |                |                 |
|-------------------------------|----------------|-----------------|
| SeFERM_ermtpe_sequ3ence       | Hospital-eff-F | Erythromycin    |
| HoACCLASS_a_sequ24ence        | STP-T-eff-A    | Betalactams     |
| HoACCLASS_a_sequ33ence        | STP-T-eff-A    | Betalactams     |
| HoACCLASS_a_sequ35ence        | STP-T-eff-A    | Betalactams     |
| HoACCLASS_a_sequ36ence        | STP-T-eff-A    | Betalactams     |
| HoACCLASS_a_sequ37ence        | STP-T-eff-A    | Betalactams     |
| HoACCLASS_a_sequ39ence        | STP-T-eff-A    | Betalactams     |
| HiAAMG_E_sequ6ence            | STP-inf-A      | Aminoglycosides |
| HiApraminoglycosidemodelcSeq3 | STP-inf-A      | Aminoglycosides |
| HoACCLASS_a_sequ45ence        | STP-T-eff-A    | Betalactams     |
| SeFAMG_I_sequ6ence            | Hospital-eff-F | Aminoglycosides |
| HoACCLASS_a_sequ47ence        | STP-T-eff-A    | Betalactams     |
| HoACCLASS_a_sequ49ence        | STP-T-eff-A    | Betalactams     |
| HiFERM_ermtpe_sequ11ence      | STP-inf-F      | Erythromycin    |
| HiAAMG_I_sequ2ence            | STP-inf-A      | Aminoglycosides |
| HiFAMG_I_sequ1ence            | STP-inf-F      | Aminoglycosides |
| SeAAMG_E_sequ1ence            | Hospital-eff-A | Aminoglycosides |
| SeFAMG_E_sequ3ence            | Hospital-eff-F | Aminoglycosides |
| HoACCLASS_a_sequ53ence        | STP-T-eff-A    | Betalactams     |
| HoACCLASS_a_sequ54ence        | STP-T-eff-A    | Betalactams     |
| HoACCLASS_a_sequ56ence        | STP-T-eff-A    | Betalactams     |
| HiFAMG_C_sequ2ence            | STP-inf-F      | Aminoglycosides |
| HiFAMG_H_sequ6ence            | STP-inf-F      | Aminoglycosides |
| HoACCLASS_a_sequ62ence        | STP-T-eff-A    | Betalactams     |
| HoACCLASS_a_sequ68ence        | STP-T-eff-A    | Betalactams     |
| HoACCLASS_a_sequ69ence        | STP-T-eff-A    | Betalactams     |
| SeFAMG_H_sequ10ence           | Hospital-eff-F | Aminoglycosides |
| HoACCLASS_a_sequ6ence         | STP-T-eff-A    | Betalactams     |
| SeAAMG_H_sequ6ence            | Hospital-eff-A | Aminoglycosides |
| HoACCLASS_a_sequ71ence        | STP-T-eff-A    | Betalactams     |
| HoACCLASS_a_sequ72ence        | STP-T-eff-A    | Betalactams     |
| HoACCLASS_a_sequ74ence        | STP-T-eff-A    | Betalactams     |
| HoACCLASS_a_sequ79ence        | STP-T-eff-A    | Betalactams     |
| HoACCLASS_a_sequ7ence         | STP-T-eff-A    | Betalactams     |
| HoACCLASS_a_sequ80ence        | STP-T-eff-A    | Betalactams     |
| HiFAMG_H_sequ5ence            | STP-inf-F      | Aminoglycosides |
| HoACCLASS_a_sequ81ence        | STP-T-eff-A    | Betalactams     |
| HoACCLASS_a_sequ8ence         | STP-T-eff-A    | Betalactams     |
| SeFAMG_I_sequ2ence            | Hospital-eff-F | Aminoglycosides |
| HoACCLASS_b12_sequ10ence      | STP-T-eff-A    | Betalactams     |
| HiAAMG_E_sequ5ence            | STP-inf-A      | Aminoglycosides |
| SeAAMG_C_sequ4ence            | Hospital-eff-A | Aminoglycosides |
| SeFAMG_H_sequ1ence            | Hospital-eff-F | Aminoglycosides |
| HiFAMG_A_sequ2ence            | STP-inf-F      | Aminoglycosides |
| SeAAMG_C_sequ3ence            | Hospital-eff-A | Aminoglycosides |
| SeFAMG_C_sequ1ence            | Hospital-eff-F | Aminoglycosides |

|                               |                |                 |
|-------------------------------|----------------|-----------------|
| HoACCLASS_b12_sequ14ence      | STP-T-eff-A    | Betalactams     |
| HoACCLASS_b12_sequ15ence      | STP-T-eff-A    | Betalactams     |
| HoACCLASS_b12_sequ16ence      | STP-T-eff-A    | Betalactams     |
| HiApraminoglycosidemodelcSeq2 | STP-inf-A      | Aminoglycosides |
| HiFAMG_E_sequ4ence            | STP-inf-F      | Aminoglycosides |
| HoACCLASS_b12_sequ2ence       | STP-T-eff-A    | Betalactams     |
| HoACCLASS_b12_sequ3ence       | STP-T-eff-A    | Betalactams     |
| HoACCLASS_b12_sequ4ence       | STP-T-eff-A    | Betalactams     |
| HoACCLASS_b12_sequ5ence       | STP-T-eff-A    | Betalactams     |
| HoACCLASS_b12_sequ6ence       | STP-T-eff-A    | Betalactams     |
| HoACCLASS_b12_sequ8ence       | STP-T-eff-A    | Betalactams     |
| HoACCLASS_b12_sequ9ence       | STP-T-eff-A    | Betalactams     |
| HoACCLASS_b3_sequ1ence        | STP-T-eff-A    | Betalactams     |
| HoACCLASS_b3_sequ7ence        | STP-T-eff-A    | Betalactams     |
| HoACCLASS_c_sequ1ence         | STP-T-eff-A    | Betalactams     |
| SeAAMG_D_sequ3ence            | Hospital-eff-A | Aminoglycosides |
| HoACCLASS_c_sequ2ence         | STP-T-eff-A    | Betalactams     |
| HoACCLASS_c_sequ7ence         | STP-T-eff-A    | Betalactams     |
| HiAAMG_I_sequ5ence            | STP-inf-A      | Aminoglycosides |
| HiAAMG_A_sequ1ence            | STP-inf-A      | Aminoglycosides |
| HoACCLASS_c_sequ8ence         | STP-T-eff-A    | Betalactams     |
| HoACCLASS_d1_sequ10ence       | STP-T-eff-A    | Betalactams     |
| HoACCLASS_d1_sequ1ence        | STP-T-eff-A    | Betalactams     |
| HoACCLASS_d1_sequ2ence        | STP-T-eff-A    | Betalactams     |
| HoACCLASS_d1_sequ3ence        | STP-T-eff-A    | Betalactams     |
| SeATET_eff_sequ7ence          | Hospital-eff-A | Tetracyclines   |
| HoACCLASS_d1_sequ5ence        | STP-T-eff-A    | Betalactams     |
| HoACCLASS_d1_sequ6ence        | STP-T-eff-A    | Betalactams     |
| SeAQNR_sequ1ence              | Hospital-eff-A | Quinolones      |
| SeFQNR_sequ5ence              | Hospital-eff-F | Quinolones      |
| HoACCLASS_d1_sequ8ence        | STP-T-eff-A    | Betalactams     |
| HoACCLASS_d1_sequ9ence        | STP-T-eff-A    | Betalactams     |
| HoACCLASS_d2_sequ10ence       | STP-T-eff-A    | Betalactams     |
| HoACCLASS_d2_sequ11ence       | STP-T-eff-A    | Betalactams     |
| HoACCLASS_d2_sequ16ence       | STP-T-eff-A    | Betalactams     |
| HoACCLASS_d2_sequ19ence       | STP-T-eff-A    | Betalactams     |
| HoACCLASS_d2_sequ20ence       | STP-T-eff-A    | Betalactams     |
| HoACCLASS_d2_sequ21ence       | STP-T-eff-A    | Betalactams     |
| HoACCLASS_d2_sequ22ence       | STP-T-eff-A    | Betalactams     |
| HoACCLASS_d2_sequ23ence       | STP-T-eff-A    | Betalactams     |
| HoACCLASS_d2_sequ25ence       | STP-T-eff-A    | Betalactams     |
| HoACCLASS_d2_sequ26ence       | STP-T-eff-A    | Betalactams     |
| HoACCLASS_d2_sequ28ence       | STP-T-eff-A    | Betalactams     |
| HoACCLASS_d2_sequ29ence       | STP-T-eff-A    | Betalactams     |
| HiATET_eff_sequ4ence          | STP-inf-A      | Tetracyclines   |
| HoACCLASS_d2_sequ31ence       | STP-T-eff-A    | Betalactams     |

|                            |                |                 |
|----------------------------|----------------|-----------------|
| HoACCLASS_d2_sequ38ence    | STP-T-eff-A    | Betalactams     |
| SeAAMG_E_sequ10ence        | Hospital-eff-A | Aminoglycosides |
| HoACCLASS_d2_sequ39ence    | STP-T-eff-A    | Betalactams     |
| SeFERM_ermttype_sequ6ence  | Hospital-eff-F | Erythromycin    |
| HoACCLASS_d2_sequ3ence     | STP-T-eff-A    | Betalactams     |
| HoACCLASS_d2_sequ42ence    | STP-T-eff-A    | Betalactams     |
| SeFAMG_I_sequ3ence         | Hospital-eff-F | Aminoglycosides |
| HiAQNR_sequ1ence           | STP-inf-A      | Quinolones      |
| HiFQNR_sequ2ence           | STP-inf-F      | Quinolones      |
| HoACCLASS_d2_sequ45ence    | STP-T-eff-A    | Betalactams     |
| SeFAMG_D_sequ3ence         | Hospital-eff-F | Aminoglycosides |
| HoACCLASS_d2_sequ46ence    | STP-T-eff-A    | Betalactams     |
| HiAERM_ermttype_sequ7ence  | STP-inf-A      | Erythromycin    |
| SeFAMG_E_sequ9ence         | Hospital-eff-F | Aminoglycosides |
| SeAAMG_E_sequ9ence         | Hospital-eff-A | Aminoglycosides |
| SeFAMG_E_sequ8ence         | Hospital-eff-F | Aminoglycosides |
| HiFERM_ermttype_sequ9ence  | STP-inf-F      | Erythromycin    |
| HoACCLASS_d2_sequ48ence    | STP-T-eff-A    | Betalactams     |
| HiAAMG_I_sequ6ence         | STP-inf-A      | Aminoglycosides |
| HoACCLASS_d2_sequ4ence     | STP-T-eff-A    | Betalactams     |
| HoACCLASS_d2_sequ53ence    | STP-T-eff-A    | Betalactams     |
| HiACCLASS_b3_sequ2ence     | STP-inf-A      | Betalactams     |
| SeFCLASS_a_sequ59ence      | Hospital-eff-F | Betalactams     |
| HiACCLASS_a_sequ38ence     | STP-inf-A      | Betalactams     |
| SeACCLASS_a_sequ4ence      | Hospital-eff-A | Betalactams     |
| SeFCLASS_a_sequ10ence      | Hospital-eff-F | Betalactams     |
| HiFCLASS_d2_sequ12ence     | STP-inf-F      | Betalactams     |
| HiFCLASS_d2_sequ6ence      | STP-inf-F      | Betalactams     |
| HiACCLASS_c_sequ8ence      | STP-inf-A      | Betalactams     |
| HiFCLASS_a_sequ54ence      | STP-inf-F      | Betalactams     |
| SeFCLASS_b12_sequ4ence     | Hospital-eff-F | Betalactams     |
| SeFERM_ermttype_sequ10ence | Hospital-eff-F | Erythromycin    |
| SeACCLASS_c_sequ9ence      | Hospital-eff-A | Betalactams     |
| SeFCLASS_c_sequ11ence      | Hospital-eff-F | Betalactams     |
| HiACCLASS_a_sequ29ence     | STP-inf-A      | Betalactams     |
| HiFCLASS_a_sequ24ence      | STP-inf-F      | Betalactams     |
| SeACCLASS_a_sequ21ence     | Hospital-eff-A | Betalactams     |
| SeFCLASS_a_sequ6ence       | Hospital-eff-F | Betalactams     |
| SeACCLASS_b3_sequ1ence     | Hospital-eff-A | Betalactams     |
| SeFCLASS_a_sequ40ence      | Hospital-eff-F | Betalactams     |
| SeFCLASS_b3_sequ1ence      | Hospital-eff-F | Betalactams     |
| HiFCLASS_a_sequ39ence      | STP-inf-F      | Betalactams     |
| HiACCLASS_b3_sequ3ence     | STP-inf-A      | Betalactams     |
| HiFCLASS_d2_sequ19ence     | STP-inf-F      | Betalactams     |
| HiACCLASS_d2_sequ32ence    | STP-inf-A      | Betalactams     |
| SeAERM_ermttype_sequ4ence  | Hospital-eff-A | Erythromycin    |

|                           |                |                 |
|---------------------------|----------------|-----------------|
| SeAClass_d2_sequ4ence     | Hospital-eff-A | Betalactams     |
| SeFCLASS_d2_sequ6ence     | Hospital-eff-F | Betalactams     |
| SeFCLASS_d2_sequ25ence    | Hospital-eff-F | Betalactams     |
| SeFERM_ermttype_sequ4ence | Hospital-eff-F | Erythromycin    |
| HiAAMG_H_sequ5ence        | STP-inf-A      | Aminoglycosides |
| SeAClass_d2_sequ12ence    | Hospital-eff-A | Betalactams     |
| SeFCLASS_a_sequ29ence     | Hospital-eff-F | Betalactams     |
| HiAClass_b12_sequ4ence    | STP-inf-A      | Betalactams     |
| HiFCLASS_b12_sequ3ence    | STP-inf-F      | Betalactams     |
| SeAClass_a_sequ30ence     | Hospital-eff-A | Betalactams     |
| SeAClass_b12_sequ1ence    | Hospital-eff-A | Betalactams     |
| SeAQNR_sequ6ence          | Hospital-eff-A | Quinolones      |
| HiAClass_d2_sequ24ence    | STP-inf-A      | Betalactams     |
| HiFCLASS_d2_sequ18ence    | STP-inf-F      | Betalactams     |
| HiAClass_a_sequ18ence     | STP-inf-A      | Betalactams     |
| HiFCLASS_a_sequ4ence      | STP-inf-F      | Betalactams     |
| SeAClass_a_sequ43ence     | Hospital-eff-A | Betalactams     |
| SeFCLASS_a_sequ66ence     | Hospital-eff-F | Betalactams     |
| SeFCLASS_d2_sequ3ence     | Hospital-eff-F | Betalactams     |
| SeAClass_a_sequ39ence     | Hospital-eff-A | Betalactams     |
| HiAClass_a_sequ42ence     | STP-inf-A      | Betalactams     |
| HiAClass_c_sequ4ence      | STP-inf-A      | Betalactams     |
| HiAClass_d2_sequ12ence    | STP-inf-A      | Betalactams     |
| HiFCLASS_c_sequ2ence      | STP-inf-F      | Betalactams     |
| SeAClass_a_sequ38ence     | Hospital-eff-A | Betalactams     |
| HiAClass_d2_sequ8ence     | STP-inf-A      | Betalactams     |
| HiFCLASS_a_sequ57ence     | STP-inf-F      | Betalactams     |
| HiFCLASS_d2_sequ10ence    | STP-inf-F      | Betalactams     |
| HiFCLASS_c_sequ4ence      | STP-inf-F      | Betalactams     |
| SeAClass_a_sequ32ence     | Hospital-eff-A | Betalactams     |
| HiFCLASS_a_sequ16ence     | STP-inf-F      | Betalactams     |
| HiFCLASS_b3_sequ5ence     | STP-inf-F      | Betalactams     |
| HiFCLASS_c_sequ7ence      | STP-inf-F      | Betalactams     |
| SeAAMG_D_sequ2ence        | Hospital-eff-A | Aminoglycosides |
| SeAClass_a_sequ33ence     | Hospital-eff-A | Betalactams     |
| SeFAMG_D_sequ4ence        | Hospital-eff-F | Aminoglycosides |
| SeFCLASS_d2_sequ14ence    | Hospital-eff-F | Betalactams     |
| SeAAMG_E_sequ12ence       | Hospital-eff-A | Aminoglycosides |
| HiFCLASS_d2_sequ3ence     | STP-inf-F      | Betalactams     |
| HiAClass_a_sequ40ence     | STP-inf-A      | Betalactams     |
| HiAClass_a_sequ6ence      | STP-inf-A      | Betalactams     |
| HiFTET_eff_sequ5ence      | STP-inf-F      | Tetracyclines   |
| SeAClass_a_sequ25ence     | Hospital-eff-A | Betalactams     |
| SeFCLASS_a_sequ35ence     | Hospital-eff-F | Betalactams     |
| HiFCLASS_a_sequ53ence     | STP-inf-F      | Betalactams     |
| SeFAMG_B_sequ6ence        | Hospital-eff-F | Aminoglycosides |

|                               |                |                 |
|-------------------------------|----------------|-----------------|
| SeFCLASS_a_sequ44ence         | Hospital-eff-F | Betalactams     |
| SeFQNR_sequ4ence              | Hospital-eff-F | Quinolones      |
| HiFERM_ermttype_sequ7ence     | STP-inf-F      | Erythromycin    |
| HiFCLASS_a_sequ47ence         | STP-inf-F      | Betalactams     |
| HiFCLASS_a_sequ59ence         | STP-inf-F      | Betalactams     |
| SeFCLASS_a_sequ13ence         | Hospital-eff-F | Betalactams     |
| SeFCLASS_d1_sequ4ence         | Hospital-eff-F | Betalactams     |
| HiACCLASS_a_sequ43ence        | STP-inf-A      | Betalactams     |
| SeFAMG_E_sequ5ence            | Hospital-eff-F | Aminoglycosides |
| SeFCLASS_a_sequ51ence         | Hospital-eff-F | Betalactams     |
| SeACCLASS_a_sequ49ence        | Hospital-eff-A | Betalactams     |
| SeFAMG_H_sequ11ence           | Hospital-eff-F | Aminoglycosides |
| SeFTET_rpg_sequ3ence          | Hospital-eff-F | Tetracyclines   |
| HiFAMG_D_sequ5ence            | STP-inf-F      | Aminoglycosides |
| HiFCLASS_a_sequ27ence         | STP-inf-F      | Betalactams     |
| SeFCLASS_d2_sequ8ence         | Hospital-eff-F | Betalactams     |
| HiFCLASS_a_sequ3ence          | STP-inf-F      | Betalactams     |
| HiFTET_rpg_sequ5ence          | STP-inf-F      | Tetracyclines   |
| HiACCLASS_d2_sequ29ence       | STP-inf-A      | Betalactams     |
| SeACCLASS_a_sequ44ence        | Hospital-eff-A | Betalactams     |
| SeFAMG_C_sequ4ence            | Hospital-eff-F | Aminoglycosides |
| SeFCLASS_b12_sequ7ence        | Hospital-eff-F | Betalactams     |
| HiAAMG_E_sequ3ence            | STP-inf-A      | Aminoglycosides |
| HiACCLASS_c_sequ6ence         | STP-inf-A      | Betalactams     |
| HiACCLASS_c_sequ7ence         | STP-inf-A      | Betalactams     |
| HiACCLASS_d2_sequ2ence        | STP-inf-A      | Betalactams     |
| SeACCLASS_a_sequ45ence        | Hospital-eff-A | Betalactams     |
| SeACCLASS_c_sequ2ence         | Hospital-eff-A | Betalactams     |
| SeFCLASS_a_sequ27ence         | Hospital-eff-F | Betalactams     |
| SeFCLASS_c_sequ3ence          | Hospital-eff-F | Betalactams     |
| HiAAMG_H_sequ8ence            | STP-inf-A      | Aminoglycosides |
| HiACCLASS_a_sequ39ence        | STP-inf-A      | Betalactams     |
| HiApraminoglycosidemodelcSeq4 | STP-inf-A      | Aminoglycosides |
| HiFAMG_B_sequ4ence            | STP-inf-F      | Aminoglycosides |
| SeFAMG_E_sequ10ence           | Hospital-eff-F | Aminoglycosides |
| SeFCLASS_a_sequ46ence         | Hospital-eff-F | Betalactams     |
| HiACCLASS_c_sequ2ence         | STP-inf-A      | Betalactams     |
| HiFCLASS_c_sequ9ence          | STP-inf-F      | Betalactams     |
| HiFERM_ermttype_sequ2ence     | STP-inf-F      | Erythromycin    |
| SeATET_rpg_sequ1ence          | Hospital-eff-A | Tetracyclines   |
| SeFAMG_H_sequ2ence            | Hospital-eff-F | Aminoglycosides |
| SeFTET_eff_sequ5ence          | Hospital-eff-F | Tetracyclines   |
| SeFTET_rpg_sequ5ence          | Hospital-eff-F | Tetracyclines   |
| HiAAMG_D_sequ2ence            | STP-inf-A      | Aminoglycosides |
| HiAERM_ermttype_sequ6ence     | STP-inf-A      | Erythromycin    |
| SeATET_eff_sequ1ence          | Hospital-eff-A | Tetracyclines   |



|                          |                |                 |
|--------------------------|----------------|-----------------|
| SeFTET_eff_sequ4ence     | Hospital-eff-F | Tetracyclines   |
| HiAAMG_E_sequ8ence       | STP-inf-A      | Aminoglycosides |
| HiACCLASS_b12_sequ1ence  | STP-inf-A      | Betalactams     |
| HiFCLASS_b12_sequ2ence   | STP-inf-F      | Betalactams     |
| HiFERM_ermtyp_sequ3ence  | STP-inf-F      | Erythromycin    |
| SeFCLASS_a_sequ24ence    | Hospital-eff-F | Betalactams     |
| SeFCLASS_a_sequ47ence    | Hospital-eff-F | Betalactams     |
| SeFCLASS_c_sequ14ence    | Hospital-eff-F | Betalactams     |
| SeFTET_rpg_sequ4ence     | Hospital-eff-F | Tetracyclines   |
| HiATET_rpg_sequ3ence     | STP-inf-A      | Tetracyclines   |
| HiFAMG_H_sequ1ence       | STP-inf-F      | Aminoglycosides |
| HiFCLASS_d1_sequ2ence    | STP-inf-F      | Betalactams     |
| SeFCLASS_d2_sequ18ence   | Hospital-eff-F | Betalactams     |
| HiFCLASS_a_sequ46ence    | STP-inf-F      | Betalactams     |
| HiFCLASS_a_sequ55ence    | STP-inf-F      | Betalactams     |
| SeACCLASS_d2_sequ6ence   | Hospital-eff-A | Betalactams     |
| SeFAMG_E_sequ18ence      | Hospital-eff-F | Aminoglycosides |
| SeFAMG_E_sequ7ence       | Hospital-eff-F | Aminoglycosides |
| SeFCLASS_a_sequ45ence    | Hospital-eff-F | Betalactams     |
| SeFCLASS_b3_sequ2ence    | Hospital-eff-F | Betalactams     |
| SeFERM_ermtyp_sequ11ence | Hospital-eff-F | Erythromycin    |
| HiFCLASS_a_sequ37ence    | STP-inf-F      | Betalactams     |
| SeFAMG_B_sequ3ence       | Hospital-eff-F | Aminoglycosides |
| SeFAMG_I_sequ7ence       | Hospital-eff-F | Aminoglycosides |
| SeFCLASS_c_sequ12ence    | Hospital-eff-F | Betalactams     |
| SeFERM_ermtyp_sequ4ence  | Hospital-eff-F | Erythromycin    |
| SeAAMG_H_sequ2ence       | Hospital-eff-A | Aminoglycosides |
| SeACCLASS_b12_sequ7ence  | Hospital-eff-A | Betalactams     |
| SeFAMG_H_sequ5ence       | Hospital-eff-F | Aminoglycosides |
| SeFERM_ermtyp_sequ5ence  | Hospital-eff-F | Erythromycin    |
| HiAAMG_D_sequ3ence       | STP-inf-A      | Aminoglycosides |
| HiFAMG_D_sequ4ence       | STP-inf-F      | Aminoglycosides |
| HiFCLASS_b3_sequ4ence    | STP-inf-F      | Betalactams     |
| HiFTET_rpg_sequ6ence     | STP-inf-F      | Tetracyclines   |
| SeAAMG_D_sequ5ence       | Hospital-eff-A | Aminoglycosides |
| SeACCLASS_b3_sequ3ence   | Hospital-eff-A | Betalactams     |
| SeAERM_ermtyp_sequ5ence  | Hospital-eff-A | Erythromycin    |
| SeFAMG_D_sequ6ence       | Hospital-eff-F | Aminoglycosides |
| HiACCLASS_a_sequ36ence   | STP-inf-A      | Betalactams     |
| HiACCLASS_a_sequ9ence    | STP-inf-A      | Betalactams     |
| SeACCLASS_a_sequ10ence   | Hospital-eff-A | Betalactams     |
| SeACCLASS_a_sequ18ence   | Hospital-eff-A | Betalactams     |
| SeACCLASS_a_sequ31ence   | Hospital-eff-A | Betalactams     |
| SeACCLASS_b3_sequ4ence   | Hospital-eff-A | Betalactams     |
| SeFCLASS_a_sequ1ence     | Hospital-eff-F | Betalactams     |
| SeFCLASS_c_sequ5ence     | Hospital-eff-F | Betalactams     |

|                          |                |                 |
|--------------------------|----------------|-----------------|
| HiATET_rpg_sequ4ence     | STP-inf-A      | Tetracyclines   |
| HiATET_rpg_sequ5ence     | STP-inf-A      | Tetracyclines   |
| HiFCLASS_a_sequ17ence    | STP-inf-F      | Betalactams     |
| SeFCLASS_a_sequ9ence     | Hospital-eff-F | Betalactams     |
| SeACCLASS_c_sequ4ence    | Hospital-eff-A | Betalactams     |
| SeACCLASS_c_sequ8ence    | Hospital-eff-A | Betalactams     |
| SeACCLASS_d1_sequ6ence   | Hospital-eff-A | Betalactams     |
| SeACCLASS_d2_sequ10ence  | Hospital-eff-A | Betalactams     |
| SeFCLASS_a_sequ48ence    | Hospital-eff-F | Betalactams     |
| SeFCLASS_b12_sequ6ence   | Hospital-eff-F | Betalactams     |
| SeFCLASS_c_sequ2ence     | Hospital-eff-F | Betalactams     |
| SeFCLASS_d2_sequ9ence    | Hospital-eff-F | Betalactams     |
| HiAAMG_B_sequ4ence       | STP-inf-A      | Aminoglycosides |
| HiACCLASS_a_sequ13ence   | STP-inf-A      | Betalactams     |
| HiACCLASS_a_sequ22ence   | STP-inf-A      | Betalactams     |
| HiACCLASS_a_sequ7ence    | STP-inf-A      | Betalactams     |
| HiACCLASS_d2_sequ11ence  | STP-inf-A      | Betalactams     |
| HiACCLASS_d2_sequ1ence   | STP-inf-A      | Betalactams     |
| HiFAMG_E_sequ5ence       | STP-inf-F      | Aminoglycosides |
| HiFAMG_E_sequ6ence       | STP-inf-F      | Aminoglycosides |
| HiFCLASS_a_sequ10ence    | STP-inf-F      | Betalactams     |
| HiFCLASS_a_sequ19ence    | STP-inf-F      | Betalactams     |
| HiFCLASS_a_sequ21ence    | STP-inf-F      | Betalactams     |
| HiFCLASS_a_sequ28ence    | STP-inf-F      | Betalactams     |
| HiFCLASS_a_sequ32ence    | STP-inf-F      | Betalactams     |
| HiFCLASS_a_sequ43ence    | STP-inf-F      | Betalactams     |
| HiFCLASS_d2_sequ1ence    | STP-inf-F      | Betalactams     |
| SeAAMG_B_sequ1ence       | Hospital-eff-A | Aminoglycosides |
| SeAAMG_E_sequ7ence       | Hospital-eff-A | Aminoglycosides |
| SeACCLASS_a_sequ15ence   | Hospital-eff-A | Betalactams     |
| SeACCLASS_a_sequ47ence   | Hospital-eff-A | Betalactams     |
| SeACCLASS_a_sequ48ence   | Hospital-eff-A | Betalactams     |
| SeACCLASS_a_sequ9ence    | Hospital-eff-A | Betalactams     |
| SeACCLASS_c_sequ5ence    | Hospital-eff-A | Betalactams     |
| SeAERM_ermtype_sequ3ence | Hospital-eff-A | Erythromycin    |
| SeAMPH_sequ6ence         | Hospital-eff-A | Aminoglycosides |
| SeFAMG_B_sequ2ence       | Hospital-eff-F | Aminoglycosides |
| SeFCLASS_a_sequ23ence    | Hospital-eff-F | Betalactams     |
| SeFCLASS_a_sequ26ence    | Hospital-eff-F | Betalactams     |
| SeFCLASS_a_sequ4ence     | Hospital-eff-F | Betalactams     |
| SeFCLASS_a_sequ63ence    | Hospital-eff-F | Betalactams     |
| SeFCLASS_a_sequ70ence    | Hospital-eff-F | Betalactams     |
| SeFCLASS_d2_sequ19ence   | Hospital-eff-F | Betalactams     |
| HiAAMG_D_sequ4ence       | STP-inf-A      | Aminoglycosides |
| HiAAMG_E_sequ4ence       | STP-inf-A      | Aminoglycosides |
| HiFAMG_B_sequ3ence       | STP-inf-F      | Aminoglycosides |

|                          |                |                 |
|--------------------------|----------------|-----------------|
| HiFAMG_D_sequ3ence       | STP-inf-F      | Aminoglycosides |
| SeFAMG_B_sequ4ence       | Hospital-eff-F | Aminoglycosides |
| SeFAMG_E_sequ4ence       | Hospital-eff-F | Aminoglycosides |
| HiATET_rpg_sequ1ence     | STP-inf-A      | Tetracyclines   |
| HiFQNR_sequ5ence         | STP-inf-F      | Quinolones      |
| HiFQNR_sequ6ence         | STP-inf-F      | Quinolones      |
| SeACCLASS_c_sequ6ence    | Hospital-eff-A | Betalactams     |
| SeAQNR_sequ5ence         | Hospital-eff-A | Quinolones      |
| SeFCLASS_c_sequ8ence     | Hospital-eff-F | Betalactams     |
| SeFCLASS_c_sequ9ence     | Hospital-eff-F | Betalactams     |
| SeFQNR_sequ3ence         | Hospital-eff-F | Quinolones      |
| SeFTET_rpg_sequ2ence     | Hospital-eff-F | Tetracyclines   |
| HiAAMG_I_sequ1ence       | STP-inf-A      | Aminoglycosides |
| HiACCLASS_b12_sequ2ence  | STP-inf-A      | Betalactams     |
| HiACCLASS_d2_sequ19ence  | STP-inf-A      | Betalactams     |
| HiACCLASS_d2_sequ20ence  | STP-inf-A      | Betalactams     |
| HiAERM_ermtyp_sequ4ence  | STP-inf-A      | Erythromycin    |
| HiFAMG_I_sequ3ence       | STP-inf-F      | Aminoglycosides |
| HiFCLASS_a_sequ58ence    | STP-inf-F      | Betalactams     |
| HiFCLASS_d2_sequ8ence    | STP-inf-F      | Betalactams     |
| HiFERM_ermtyp_sequ13ence | STP-inf-F      | Erythromycin    |
| SeAAMG_C_sequ2ence       | Hospital-eff-A | Aminoglycosides |
| SeAAMG_I_sequ1ence       | Hospital-eff-A | Aminoglycosides |
| SeAAMG_I_sequ3ence       | Hospital-eff-A | Aminoglycosides |
| SeACCLASS_b12_sequ3ence  | Hospital-eff-A | Betalactams     |
| SeACCLASS_b12_sequ4ence  | Hospital-eff-A | Betalactams     |
| SeACCLASS_d2_sequ11ence  | Hospital-eff-A | Betalactams     |
| SeACCLASS_d2_sequ15ence  | Hospital-eff-A | Betalactams     |
| SeACCLASS_d2_sequ8ence   | Hospital-eff-A | Betalactams     |
| SeAERM_ermtyp_sequ6ence  | Hospital-eff-A | Erythromycin    |
| SeAQNR_sequ4ence         | Hospital-eff-A | Quinolones      |
| SeFAMG_C_sequ3ence       | Hospital-eff-F | Aminoglycosides |
| SeFAMG_I_sequ1ence       | Hospital-eff-F | Aminoglycosides |
| SeFCLASS_a_sequ39ence    | Hospital-eff-F | Betalactams     |
| SeFCLASS_a_sequ42ence    | Hospital-eff-F | Betalactams     |
| SeFCLASS_a_sequ57ence    | Hospital-eff-F | Betalactams     |
| SeFCLASS_a_sequ58ence    | Hospital-eff-F | Betalactams     |
| SeFCLASS_b12_sequ3ence   | Hospital-eff-F | Betalactams     |
| SeFCLASS_d2_sequ16ence   | Hospital-eff-F | Betalactams     |
| SeFERM_ermtyp_sequ6ence  | Hospital-eff-F | Erythromycin    |
| HiACCLASS_a_sequ15ence   | STP-inf-A      | Betalactams     |
| HiACCLASS_a_sequ23ence   | STP-inf-A      | Betalactams     |
| HiACCLASS_a_sequ2ence    | STP-inf-A      | Betalactams     |
| HiACCLASS_a_sequ33ence   | STP-inf-A      | Betalactams     |
| HiACCLASS_a_sequ34ence   | STP-inf-A      | Betalactams     |
| HiACCLASS_a_sequ3ence    | STP-inf-A      | Betalactams     |

|                          |             |                 |
|--------------------------|-------------|-----------------|
| HiACCLASS_c_sequ10ence   | STP-inf-A   | Betalactams     |
| HiACCLASS_c_sequ9ence    | STP-inf-A   | Betalactams     |
| HiACCLASS_d1_sequ1ence   | STP-inf-A   | Betalactams     |
| HiAERM_ermtype_sequ5ence | STP-inf-A   | Erythromycin    |
| HiFCLASS_a_sequ12ence    | STP-inf-F   | Betalactams     |
| HiFCLASS_a_sequ15ence    | STP-inf-F   | Betalactams     |
| HiFCLASS_a_sequ31ence    | STP-inf-F   | Betalactams     |
| HiFCLASS_a_sequ44ence    | STP-inf-F   | Betalactams     |
| HiFCLASS_a_sequ45ence    | STP-inf-F   | Betalactams     |
| HiFCLASS_a_sequ50ence    | STP-inf-F   | Betalactams     |
| HiFCLASS_a_sequ6ence     | STP-inf-F   | Betalactams     |
| HiFCLASS_a_sequ8ence     | STP-inf-F   | Betalactams     |
| HiFCLASS_c_sequ3ence     | STP-inf-F   | Betalactams     |
| HiFCLASS_c_sequ6ence     | STP-inf-F   | Betalactams     |
| HiFCLASS_d1_sequ1ence    | STP-inf-F   | Betalactams     |
| HiFMPH_sequ3ence         | STP-inf-F   | Macrolides      |
| HiFMPH_sequ5ence         | STP-inf-F   | Macrolides      |
| HiFMPH_sequ7ence         | STP-inf-F   | Macrolides      |
| HiFTET_eff_sequ4ence     | STP-inf-F   | Tetracyclines   |
| HoACCLASS_a_sequ25ence   | STP-T-eff-A | Betalactams     |
| HoACCLASS_a_sequ28ence   | STP-T-eff-A | Betalactams     |
| HoACCLASS_a_sequ2ence    | STP-T-eff-A | Betalactams     |
| HoACCLASS_a_sequ31ence   | STP-T-eff-A | Betalactams     |
| HoACCLASS_a_sequ34ence   | STP-T-eff-A | Betalactams     |
| HoACCLASS_a_sequ38ence   | STP-T-eff-A | Betalactams     |
| HoACCLASS_a_sequ3ence    | STP-T-eff-A | Betalactams     |
| HoACCLASS_a_sequ40ence   | STP-T-eff-A | Betalactams     |
| HoACCLASS_a_sequ46ence   | STP-T-eff-A | Betalactams     |
| HoACCLASS_a_sequ50ence   | STP-T-eff-A | Betalactams     |
| HoACCLASS_a_sequ58ence   | STP-T-eff-A | Betalactams     |
| HoACCLASS_a_sequ78ence   | STP-T-eff-A | Betalactams     |
| HoACCLASS_a_sequ9ence    | STP-T-eff-A | Betalactams     |
| HoACCLASS_c_sequ12ence   | STP-T-eff-A | Betalactams     |
| HoACCLASS_d1_sequ7ence   | STP-T-eff-A | Betalactams     |
| HoAMPH_sequ3ence         | STP-T-eff-A | Aminoglycosides |
| HoAMPH_sequ4ence         | STP-T-eff-A | Aminoglycosides |
| HoATET_rpg_sequ2ence     | STP-T-eff-A | Tetracyclines   |
| HoFCLASS_a_sequ17ence    | STP-T-eff-F | Betalactams     |
| HoFCLASS_a_sequ1ence     | STP-T-eff-F | Betalactams     |
| HoFCLASS_a_sequ22ence    | STP-T-eff-F | Betalactams     |
| HoFCLASS_a_sequ26ence    | STP-T-eff-F | Betalactams     |
| HoFCLASS_a_sequ37ence    | STP-T-eff-F | Betalactams     |
| HoFCLASS_a_sequ43ence    | STP-T-eff-F | Betalactams     |
| HoFCLASS_a_sequ54ence    | STP-T-eff-F | Betalactams     |
| HoFCLASS_a_sequ6ence     | STP-T-eff-F | Betalactams     |
| HoFCLASS_a_sequ9ence     | STP-T-eff-F | Betalactams     |

|                         |                |                 |
|-------------------------|----------------|-----------------|
| HoFCLASS_c_sequ9ence    | STP-T-eff-F    | Betalactams     |
| HoFMPH_sequ3ence        | STP-T-eff-F    | Macrolides      |
| HoFTET_rpg_sequ1ence    | STP-T-eff-F    | Tetracyclines   |
| SeAAMG_G_sequ2ence      | Hospital-eff-A | Aminoglycosides |
| SeACCLASS_a_sequ12ence  | Hospital-eff-A | Betalactams     |
| SeACCLASS_a_sequ19ence  | Hospital-eff-A | Betalactams     |
| SeACCLASS_a_sequ26ence  | Hospital-eff-A | Betalactams     |
| SeACCLASS_a_sequ35ence  | Hospital-eff-A | Betalactams     |
| SeACCLASS_a_sequ40ence  | Hospital-eff-A | Betalactams     |
| SeACCLASS_a_sequ6ence   | Hospital-eff-A | Betalactams     |
| SeACCLASS_a_sequ7ence   | Hospital-eff-A | Betalactams     |
| SeACCLASS_c_sequ10ence  | Hospital-eff-A | Betalactams     |
| SeACCLASS_c_sequ3ence   | Hospital-eff-A | Betalactams     |
| SeATET_rpg_sequ3ence    | Hospital-eff-A | Tetracyclines   |
| SeFAMG_G_sequ3ence      | Hospital-eff-F | Aminoglycosides |
| SeFCLASS_a_sequ14ence   | Hospital-eff-F | Betalactams     |
| SeFCLASS_a_sequ17ence   | Hospital-eff-F | Betalactams     |
| SeFCLASS_a_sequ21ence   | Hospital-eff-F | Betalactams     |
| SeFCLASS_a_sequ30ence   | Hospital-eff-F | Betalactams     |
| SeFCLASS_a_sequ33ence   | Hospital-eff-F | Betalactams     |
| SeFCLASS_a_sequ50ence   | Hospital-eff-F | Betalactams     |
| SeFCLASS_a_sequ5ence    | Hospital-eff-F | Betalactams     |
| SeFCLASS_a_sequ7ence    | Hospital-eff-F | Betalactams     |
| SeFCLASS_b3_sequ6ence   | Hospital-eff-F | Betalactams     |
| SeFCLASS_c_sequ10ence   | Hospital-eff-F | Betalactams     |
| SeFCLASS_d2_sequ1ence   | Hospital-eff-F | Betalactams     |
| SeFMPH_sequ1ence        | Hospital-eff-F | Macrolides      |
| SeFTET_rpg_sequ7ence    | Hospital-eff-F | Tetracyclines   |
| HiATET_eff_sequ3ence    | STP-inf-A      | Tetracyclines   |
| HiFTET_eff_sequ3ence    | STP-inf-F      | Tetracyclines   |
| HiFTET_rpg_sequ1ence    | STP-inf-F      | Tetracyclines   |
| HoATET_eff_sequ3ence    | STP-T-eff-A    | Tetracyclines   |
| HoATET_rpg_sequ4ence    | STP-T-eff-A    | Tetracyclines   |
| HoFTET_eff_sequ1ence    | STP-T-eff-F    | Tetracyclines   |
| HoFTET_rpg_sequ4ence    | STP-T-eff-F    | Tetracyclines   |
| SeATET_eff_sequ2ence    | Hospital-eff-A | Tetracyclines   |
| SeATET_eff_sequ3ence    | Hospital-eff-A | Tetracyclines   |
| SeATET_rpg_sequ2ence    | Hospital-eff-A | Tetracyclines   |
| SeFTET_eff_sequ1ence    | Hospital-eff-F | Tetracyclines   |
| SeFTET_eff_sequ2ence    | Hospital-eff-F | Tetracyclines   |
| SeFTET_eff_sequ3ence    | Hospital-eff-F | Tetracyclines   |
| HoACCLASS_d2_sequ55ence | STP-T-eff-A    | Betalactams     |
| HoACCLASS_d2_sequ5ence  | STP-T-eff-A    | Betalactams     |
| HoACCLASS_d2_sequ8ence  | STP-T-eff-A    | Betalactams     |
| HoFCLASS_a_sequ10ence   | STP-T-eff-F    | Betalactams     |
| HoFCLASS_a_sequ14ence   | STP-T-eff-F    | Betalactams     |

|                            |             |                 |
|----------------------------|-------------|-----------------|
| HoFCLASS_a_sequ18ence      | STP-T-eff-F | Betalactams     |
| HoFCLASS_a_sequ20ence      | STP-T-eff-F | Betalactams     |
| HoFCLASS_a_sequ21ence      | STP-T-eff-F | Betalactams     |
| HoFCLASS_a_sequ23ence      | STP-T-eff-F | Betalactams     |
| HoAERM_ermtyp_e_sequ10ence | STP-T-eff-A | Erythromycin    |
| HoFCLASS_a_sequ24ence      | STP-T-eff-F | Betalactams     |
| HoFCLASS_a_sequ27ence      | STP-T-eff-F | Betalactams     |
| HoFCLASS_a_sequ28ence      | STP-T-eff-F | Betalactams     |
| HoFCLASS_a_sequ31ence      | STP-T-eff-F | Betalactams     |
| HoFCLASS_a_sequ34ence      | STP-T-eff-F | Betalactams     |
| HoFCLASS_a_sequ35ence      | STP-T-eff-F | Betalactams     |
| HoFCLASS_a_sequ36ence      | STP-T-eff-F | Betalactams     |
| HoFCLASS_a_sequ38ence      | STP-T-eff-F | Betalactams     |
| HoFCLASS_a_sequ40ence      | STP-T-eff-F | Betalactams     |
| HoAAMG_I_sequ7ence         | STP-T-eff-A | Aminoglycosides |
| HoAERM_ermtyp_e_sequ11ence | STP-T-eff-A | Erythromycin    |
| HoAERM_ermtyp_e_sequ15ence | STP-T-eff-A | Erythromycin    |
| HoFCLASS_a_sequ42ence      | STP-T-eff-F | Betalactams     |
| HoFCLASS_a_sequ44ence      | STP-T-eff-F | Betalactams     |
| HoFCLASS_a_sequ48ence      | STP-T-eff-F | Betalactams     |
| HoFCLASS_a_sequ4ence       | STP-T-eff-F | Betalactams     |
| HoFAMG_A_sequ1ence         | STP-T-eff-F | Aminoglycosides |
| HoFCLASS_a_sequ52ence      | STP-T-eff-F | Betalactams     |
| HoFCLASS_a_sequ56ence      | STP-T-eff-F | Betalactams     |
| HoAAMG_C_sequ3ence         | STP-T-eff-A | Aminoglycosides |
| HoFCLASS_a_sequ58ence      | STP-T-eff-F | Betalactams     |
| HoFCLASS_a_sequ8ence       | STP-T-eff-F | Betalactams     |
| HoAAMG_I_sequ1ence         | STP-T-eff-A | Aminoglycosides |
| HoFCLASS_b12_sequ10ence    | STP-T-eff-F | Betalactams     |
| HoFCLASS_b12_sequ11ence    | STP-T-eff-F | Betalactams     |
| HoAAMG_I_sequ3ence         | STP-T-eff-A | Aminoglycosides |
| HoFCLASS_b12_sequ13ence    | STP-T-eff-F | Betalactams     |
| HoAERM_ermtyp_e_sequ14ence | STP-T-eff-A | Erythromycin    |
| HoFCLASS_b12_sequ1ence     | STP-T-eff-F | Betalactams     |
| HoFAMG_I_sequ4ence         | STP-T-eff-F | Aminoglycosides |
| HoFCLASS_b12_sequ2ence     | STP-T-eff-F | Betalactams     |
| HoFCLASS_b12_sequ3ence     | STP-T-eff-F | Betalactams     |
| HoFCLASS_b12_sequ5ence     | STP-T-eff-F | Betalactams     |
| HoFCLASS_b12_sequ6ence     | STP-T-eff-F | Betalactams     |
| HoFCLASS_b12_sequ7ence     | STP-T-eff-F | Betalactams     |
| HoFCLASS_b12_sequ8ence     | STP-T-eff-F | Betalactams     |
| HoFCLASS_b12_sequ9ence     | STP-T-eff-F | Betalactams     |
| HoFCLASS_b3_sequ1ence      | STP-T-eff-F | Betalactams     |
| HoFAMG_I_sequ6ence         | STP-T-eff-F | Aminoglycosides |
| HoFCLASS_c_sequ11ence      | STP-T-eff-F | Betalactams     |
| HoFCLASS_c_sequ1ence       | STP-T-eff-F | Betalactams     |

|                         |                |                 |
|-------------------------|----------------|-----------------|
| HoFCLASS_c_sequ2ence    | STP-T-eff-F    | Betalactams     |
| HoFCLASS_c_sequ8ence    | STP-T-eff-F    | Betalactams     |
| HoFCLASS_d1_sequ1ence   | STP-T-eff-F    | Betalactams     |
| HoAAMG_C_sequ4ence      | STP-T-eff-A    | Aminoglycosides |
| HoFCLASS_d1_sequ3ence   | STP-T-eff-F    | Betalactams     |
| HoAAMG_H_sequ4ence      | STP-T-eff-A    | Aminoglycosides |
| HoFCLASS_d2_sequ15ence  | STP-T-eff-F    | Betalactams     |
| HoAAMG_I_sequ10ence     | STP-T-eff-A    | Aminoglycosides |
| HoFCLASS_d2_sequ18ence  | STP-T-eff-F    | Betalactams     |
| HoFCLASS_d2_sequ1ence   | STP-T-eff-F    | Betalactams     |
| HoFCLASS_d2_sequ20ence  | STP-T-eff-F    | Betalactams     |
| HoFCLASS_d2_sequ24ence  | STP-T-eff-F    | Betalactams     |
| HoFCLASS_d2_sequ25ence  | STP-T-eff-F    | Betalactams     |
| HoFCLASS_d2_sequ27ence  | STP-T-eff-F    | Betalactams     |
| HoFCLASS_d2_sequ28ence  | STP-T-eff-F    | Betalactams     |
| HoFCLASS_d2_sequ2ence   | STP-T-eff-F    | Betalactams     |
| HoFCLASS_d2_sequ31ence  | STP-T-eff-F    | Betalactams     |
| HoFCLASS_d2_sequ32ence  | STP-T-eff-F    | Betalactams     |
| HoFCLASS_d2_sequ3ence   | STP-T-eff-F    | Betalactams     |
| HoFCLASS_d2_sequ6ence   | STP-T-eff-F    | Betalactams     |
| HoFCLASS_d2_sequ9ence   | STP-T-eff-F    | Betalactams     |
| HoAAMG_E_sequ7ence      | STP-T-eff-A    | Aminoglycosides |
| HoFMPH_sequ5ence        | STP-T-eff-F    | Betalactams     |
| SeACCLASS_a_sequ22ence  | Hospital-eff-A | Betalactams     |
| SeACCLASS_a_sequ27ence  | Hospital-eff-A | Betalactams     |
| HoAAMG_C_sequ2ence      | STP-T-eff-A    | Aminoglycosides |
| SeACCLASS_a_sequ28ence  | Hospital-eff-A | Betalactams     |
| SeACCLASS_a_sequ34ence  | Hospital-eff-A | Betalactams     |
| SeACCLASS_a_sequ36ence  | Hospital-eff-A | Betalactams     |
| SeACCLASS_a_sequ37ence  | Hospital-eff-A | Betalactams     |
| SeACCLASS_a_sequ41ence  | Hospital-eff-A | Betalactams     |
| HoFAMG_E_sequ6ence      | STP-T-eff-F    | Aminoglycosides |
| SeACCLASS_b12_sequ6ence | Hospital-eff-A | Betalactams     |
| SeACCLASS_c_sequ1ence   | Hospital-eff-A | Betalactams     |
| SeACCLASS_d1_sequ5ence  | Hospital-eff-A | Betalactams     |
| SeACCLASS_d2_sequ14ence | Hospital-eff-A | Betalactams     |
| SeACCLASS_d2_sequ3ence  | Hospital-eff-A | Betalactams     |
| SeACCLASS_d2_sequ7ence  | Hospital-eff-A | Betalactams     |
| SeACCLASS_d2_sequ9ence  | Hospital-eff-A | Betalactams     |
| SeFCLASS_a_sequ18ence   | Hospital-eff-F | Betalactams     |
| SeFCLASS_a_sequ19ence   | Hospital-eff-F | Betalactams     |
| SeFCLASS_a_sequ25ence   | Hospital-eff-F | Betalactams     |
| SeFCLASS_a_sequ31ence   | Hospital-eff-F | Betalactams     |
| SeFCLASS_a_sequ32ence   | Hospital-eff-F | Betalactams     |
| SeFCLASS_a_sequ34ence   | Hospital-eff-F | Betalactams     |
| SeFCLASS_a_sequ41ence   | Hospital-eff-F | Betalactams     |

|                          |                |                 |
|--------------------------|----------------|-----------------|
| SeFCLASS_a_sequ49ence    | Hospital-eff-F | Betalactams     |
| SeFCLASS_a_sequ55ence    | Hospital-eff-F | Betalactams     |
| HoATET_eff_sequ7ence     | STP-T-eff-A    | Tetracyclines   |
| SeFCLASS_a_sequ60ence    | Hospital-eff-F | Betalactams     |
| HoAAMG_C_sequ6ence       | STP-T-eff-A    | Aminoglycosides |
| SeFCLASS_a_sequ68ence    | Hospital-eff-F | Betalactams     |
| SeFCLASS_a_sequ69ence    | Hospital-eff-F | Betalactams     |
| SeFCLASS_b12_sequ5ence   | Hospital-eff-F | Betalactams     |
| SeFCLASS_b12_sequ8ence   | Hospital-eff-F | Betalactams     |
| SeFCLASS_b3_sequ4ence    | Hospital-eff-F | Betalactams     |
| SeFCLASS_b3_sequ8ence    | Hospital-eff-F | Betalactams     |
| SeFCLASS_c_sequ1ence     | Hospital-eff-F | Betalactams     |
| SeFCLASS_c_sequ6ence     | Hospital-eff-F | Betalactams     |
| SeFCLASS_c_sequ7ence     | Hospital-eff-F | Betalactams     |
| SeFCLASS_d1_sequ3ence    | Hospital-eff-F | Betalactams     |
| SeFCLASS_d1_sequ7ence    | Hospital-eff-F | Betalactams     |
| SeFCLASS_d1_sequ8ence    | Hospital-eff-F | Betalactams     |
| SeFCLASS_d2_sequ10ence   | Hospital-eff-F | Betalactams     |
| HoAAMG_I_sequ9ence       | STP-T-eff-A    | Aminoglycosides |
| SeFCLASS_d2_sequ11ence   | Hospital-eff-F | Betalactams     |
| SeFCLASS_d2_sequ12ence   | Hospital-eff-F | Betalactams     |
| HoATET_eff_sequ9ence     | STP-T-eff-A    | Tetracyclines   |
| HoAAMG_C_sequ5ence       | STP-T-eff-A    | Aminoglycosides |
| HoATET_eff_sequ8ence     | STP-T-eff-A    | Tetracyclines   |
| HoAQNR_sequ1ence         | STP-T-eff-A    | Quinolones      |
| HoFQNR_sequ1ence         | STP-T-eff-F    | Quinolones      |
| HoAERM_ermtyp_sequ2ence  | STP-T-eff-A    | Erythromycin    |
| SeFCLASS_d2_sequ13ence   | Hospital-eff-F | Betalactams     |
| SeFCLASS_d2_sequ17ence   | Hospital-eff-F | Betalactams     |
| SeFCLASS_d2_sequ20ence   | Hospital-eff-F | Betalactams     |
| SeFCLASS_d2_sequ23ence   | Hospital-eff-F | Betalactams     |
| SeFCLASS_d2_sequ24ence   | Hospital-eff-F | Betalactams     |
| SeFCLASS_d2_sequ7ence    | Hospital-eff-F | Betalactams     |
| HoACCLASS_d2_sequ18ence  | STP-T-eff-A    | Betalactams     |
| HoACCLASS_a_sequ51ence   | STP-T-eff-A    | Betalactams     |
| HoACCLASS_b12_sequ17ence | STP-T-eff-A    | Betalactams     |
| HoACCLASS_a_sequ42ence   | STP-T-eff-A    | Betalactams     |
| HoFCLASS_d2_sequ16ence   | STP-T-eff-F    | Betalactams     |
| HoACCLASS_d2_sequ14ence  | STP-T-eff-A    | Betalactams     |
| HoACCLASS_d2_sequ43ence  | STP-T-eff-A    | Betalactams     |
| HoACCLASS_a_sequ15ence   | STP-T-eff-A    | Betalactams     |
| HoFCLASS_a_sequ11ence    | STP-T-eff-F    | Betalactams     |
| HoACCLASS_d2_sequ17ence  | STP-T-eff-A    | Betalactams     |
| HoFCLASS_d2_sequ12ence   | STP-T-eff-F    | Betalactams     |
| HoFCLASS_d2_sequ33ence   | STP-T-eff-F    | Betalactams     |
| HoACCLASS_d2_sequ33ence  | STP-T-eff-A    | Betalactams     |



|                          |             |                 |
|--------------------------|-------------|-----------------|
| HoACCLASS_a_sequ5ence    | STP-T-eff-A | Betalactams     |
| HoFCLASS_a_sequ13ence    | STP-T-eff-F | Betalactams     |
| HoACCLASS_d2_sequ57ence  | STP-T-eff-A | Betalactams     |
| HoACCLASS_d2_sequ54ence  | STP-T-eff-A | Betalactams     |
| HoATET_eff_sequ5ence     | STP-T-eff-A | Tetracyclines   |
| HoACCLASS_c_sequ9ence    | STP-T-eff-A | Betalactams     |
| HoACCLASS_b12_sequ11ence | STP-T-eff-A | Betalactams     |
| HoACCLASS_b12_sequ1ence  | STP-T-eff-A | Betalactams     |
| HoFCLASS_b12_sequ12ence  | STP-T-eff-F | Betalactams     |
| HoACCLASS_b3_sequ4ence   | STP-T-eff-A | Betalactams     |
| HoACCLASS_d2_sequ36ence  | STP-T-eff-A | Betalactams     |
| HoFCLASS_d2_sequ22ence   | STP-T-eff-F | Betalactams     |
| HoACCLASS_a_sequ32ence   | STP-T-eff-A | Betalactams     |
| HoFCLASS_a_sequ55ence    | STP-T-eff-F | Betalactams     |
| HoACCLASS_d2_sequ58ence  | STP-T-eff-A | Betalactams     |
| HoACCLASS_c_sequ15ence   | STP-T-eff-A | Betalactams     |
| HoACCLASS_d2_sequ15ence  | STP-T-eff-A | Betalactams     |
| HoFCLASS_c_sequ3ence     | STP-T-eff-F | Betalactams     |
| HoACCLASS_d2_sequ50ence  | STP-T-eff-A | Betalactams     |
| HoACCLASS_d2_sequ6ence   | STP-T-eff-A | Betalactams     |
| HoAAMG_H_sequ9ence       | STP-T-eff-A | Aminoglycosides |
| HoACCLASS_d2_sequ35ence  | STP-T-eff-A | Betalactams     |
| HoAAMG_D_sequ3ence       | STP-T-eff-A | Aminoglycosides |
| HoFCLASS_c_sequ7ence     | STP-T-eff-F | Betalactams     |
| HoACCLASS_a_sequ82ence   | STP-T-eff-A | Betalactams     |
| HoFCLASS_a_sequ33ence    | STP-T-eff-F | Betalactams     |
| HoFCLASS_d2_sequ10ence   | STP-T-eff-F | Betalactams     |
| HoACCLASS_b12_sequ13ence | STP-T-eff-A | Betalactams     |
| HoACCLASS_d2_sequ12ence  | STP-T-eff-A | Betalactams     |
| HoACCLASS_d2_sequ47ence  | STP-T-eff-A | Betalactams     |
| HoACCLASS_c_sequ5ence    | STP-T-eff-A | Betalactams     |
| HoAAMG_E_sequ3ence       | STP-T-eff-A | Aminoglycosides |
| HoACCLASS_a_sequ64ence   | STP-T-eff-A | Betalactams     |
| HoFCLASS_a_sequ45ence    | STP-T-eff-F | Betalactams     |
| HoACCLASS_d2_sequ34ence  | STP-T-eff-A | Betalactams     |
| HoACCLASS_d2_sequ40ence  | STP-T-eff-A | Betalactams     |
| HoFCLASS_d2_sequ5ence    | STP-T-eff-F | Betalactams     |
| HoFAMG_I_sequ3ence       | STP-T-eff-F | Aminoglycosides |
| HoAAMG_H_sequ10ence      | STP-T-eff-A | Aminoglycosides |
| HoACCLASS_b3_sequ2ence   | STP-T-eff-A | Betalactams     |
| HoACCLASS_d2_sequ56ence  | STP-T-eff-A | Betalactams     |
| HoFAMG_D_sequ2ence       | STP-T-eff-F | Aminoglycosides |
| HoFAMG_H_sequ3ence       | STP-T-eff-F | Aminoglycosides |
| HoFCLASS_c_sequ6ence     | STP-T-eff-F | Betalactams     |
| HoAERM_ermtyp_sequ3ence  | STP-T-eff-A | Erythromycin    |
| HoFQNR_sequ2ence         | STP-T-eff-F | Quinolones      |

|                         |             |                 |
|-------------------------|-------------|-----------------|
| HoFCLASS_a_sequ30ence   | STP-T-eff-F | Betalactams     |
| HoACCLASS_b3_sequ6ence  | STP-T-eff-A | Betalactams     |
| HoFCLASS_a_sequ39ence   | STP-T-eff-F | Betalactams     |
| HoFCLASS_d2_sequ26ence  | STP-T-eff-F | Betalactams     |
| HoACCLASS_a_sequ29ence  | STP-T-eff-A | Betalactams     |
| HoACCLASS_c_sequ11ence  | STP-T-eff-A | Betalactams     |
| HoACCLASS_c_sequ13ence  | STP-T-eff-A | Betalactams     |
| HoACCLASS_c_sequ6ence   | STP-T-eff-A | Betalactams     |
| HoFCLASS_d2_sequ30ence  | STP-T-eff-F | Betalactams     |
| HoACCLASS_a_sequ75ence  | STP-T-eff-A | Betalactams     |
| HoATET_eff_sequ6ence    | STP-T-eff-A | Tetracyclines   |
| HoAAMG_B_sequ4ence      | STP-T-eff-A | Aminoglycosides |
| HoACCLASS_c_sequ10ence  | STP-T-eff-A | Betalactams     |
| HoFCLASS_a_sequ3ence    | STP-T-eff-F | Betalactams     |
| HoFCLASS_b12_sequ4ence  | STP-T-eff-F | Betalactams     |
| HoAAMG_D_sequ4ence      | STP-T-eff-A | Aminoglycosides |
| HoACCLASS_d2_sequ30ence | STP-T-eff-A | Betalactams     |
| HoFAMG_D_sequ1ence      | STP-T-eff-F | Aminoglycosides |
| HoFCLASS_c_sequ10ence   | STP-T-eff-F | Betalactams     |
| HoFTET_rpg_sequ2ence    | STP-T-eff-F | Tetracyclines   |
| HoAERM_ermtyp_sequ4ence | STP-T-eff-A | Erythromycin    |
| HoATET_rpg_sequ10ence   | STP-T-eff-A | Tetracyclines   |
| HoFCLASS_a_sequ29ence   | STP-T-eff-F | Betalactams     |
| HoFCLASS_a_sequ50ence   | STP-T-eff-F | Betalactams     |
| HoFCLASS_a_sequ51ence   | STP-T-eff-F | Betalactams     |
| HoACCLASS_c_sequ14ence  | STP-T-eff-A | Betalactams     |
| HoATET_rpg_sequ1ence    | STP-T-eff-A | Tetracyclines   |
| HoFAMG_D_sequ3ence      | STP-T-eff-F | Aminoglycosides |
| HoACCLASS_b12_sequ7ence | STP-T-eff-A | Betalactams     |
| HoATET_rpg_sequ5ence    | STP-T-eff-A | Tetracyclines   |
| HoFCLASS_d2_sequ35ence  | STP-T-eff-F | Betalactams     |
| HoFTET_eff_sequ4ence    | STP-T-eff-F | Tetracyclines   |
| HoAAMG_B_sequ3ence      | STP-T-eff-A | Aminoglycosides |
| HoAAMG_E_sequ2ence      | STP-T-eff-A | Aminoglycosides |
| HoACCLASS_a_sequ18ence  | STP-T-eff-A | Betalactams     |
| HoACCLASS_a_sequ26ence  | STP-T-eff-A | Betalactams     |
| HoACCLASS_a_sequ59ence  | STP-T-eff-A | Betalactams     |
| HoACCLASS_a_sequ66ence  | STP-T-eff-A | Betalactams     |
| HoACCLASS_d2_sequ44ence | STP-T-eff-A | Betalactams     |
| HoFAMG_E_sequ3ence      | STP-T-eff-F | Aminoglycosides |
| HoFCLASS_a_sequ41ence   | STP-T-eff-F | Betalactams     |
| HoFCLASS_a_sequ53ence   | STP-T-eff-F | Betalactams     |
| HoFCLASS_d2_sequ23ence  | STP-T-eff-F | Betalactams     |
| HoATET_rpg_sequ6ence    | STP-T-eff-A | Tetracyclines   |
| HoAQNR_sequ3ence        | STP-T-eff-A | Quinolones      |
| HoATET_rpg_sequ9ence    | STP-T-eff-A | Tetracyclines   |

|                           |             |                 |
|---------------------------|-------------|-----------------|
| HoFCLASS_c_sequ4ence      | STP-T-eff-F | Betalactams     |
| HoAAMG_I_sequ2ence        | STP-T-eff-A | Aminoglycosides |
| HoACCLASS_a_sequ12ence    | STP-T-eff-A | Betalactams     |
| HoACCLASS_a_sequ63ence    | STP-T-eff-A | Betalactams     |
| HoACCLASS_b12_sequ12ence  | STP-T-eff-A | Betalactams     |
| HoACCLASS_d2_sequ1ence    | STP-T-eff-A | Betalactams     |
| HoAERM_ermttype_sequ4ence | STP-T-eff-A | Erythromycin    |
| HoAERM_ermttype_sequ6ence | STP-T-eff-A | Erythromycin    |
| HoFAMG_I_sequ1ence        | STP-T-eff-F | Aminoglycosides |
| HoFCLASS_a_sequ15ence     | STP-T-eff-F | Betalactams     |
| HoFCLASS_d2_sequ7ence     | STP-T-eff-F | Betalactams     |
| HoFERM_ermttype_sequ2ence | STP-T-eff-F | Erythromycin    |

---

**Legend:** eff (effluent); F (February); A (April); STP (sewage treatment plant); inf (influent); T (treated)

samples.

**Protein length (aa)**

---

302  
154  
154  
254  
152  
145  
154  
361  
264  
260  
272  
267  
293  
293  
295  
295  
330  
308  
298  
317  
286  
321  
322  
291  
374  
384  
404  
271  
264  
266  
282  
274  
266  
253  
283  
275  
264  
245  
290  
298  
266  
244  
294

294  
295  
294  
294  
218  
424  
396  
388  
392  
646  
614  
154  
138  
294  
213  
173  
152  
154  
209  
177  
321  
312  
267  
264  
272  
293  
290  
321  
298  
345  
301  
319  
284  
295  
296  
293  
274  
322  
275  
294  
292  
293  
404  
392  
274  
266

264  
266  
277  
271  
279  
266  
253  
283  
282  
247  
247  
264  
244  
266  
245  
290  
304  
266  
266  
294  
295  
294  
294  
218  
226  
396  
424  
392  
388  
396  
639  
680  
646  
644  
662  
639  
154  
154  
294  
255  
242  
152  
145  
177  
154  
148

361  
292  
264  
260  
272  
267  
293  
308  
300  
330  
293  
301  
332  
298  
289  
300  
321  
298  
322  
289  
294  
290  
272  
286  
295  
284  
291  
292  
291  
391  
407  
275  
266  
260  
253  
266  
267  
274  
271  
283  
282  
275  
264  
266  
245  
264

244  
269  
290  
258  
266  
257  
263  
304  
294  
295  
301  
218  
424  
396  
405  
388  
392  
599  
646  
657  
660  
154  
139  
294  
232  
152  
154  
177  
145  
305  
267  
264  
293  
319  
321  
296  
295  
293  
269  
290  
281  
267  
295  
322  
273  
404



276  
266  
274  
264  
257  
266  
282  
259  
253  
271  
245  
244  
290  
266  
266  
252  
294  
295  
302  
396  
424  
392  
388  
646  
599  
154  
154  
294  
184  
144  
145  
152  
154  
157  
182  
361  
267  
272  
260  
271  
264  
301  
331  
286  
295  
346

321  
296  
319  
293  
301  
308  
266  
322  
317  
246  
267  
319  
407  
404  
391  
291  
266  
279  
270  
283  
282  
275  
281  
274  
245  
269  
244  
266  
266  
268  
294  
301  
294  
294  
294  
218  
396  
405  
412  
388  
632  
154  
154  
294  
173  
184

157  
144  
145  
144  
152  
155  
182  
361  
264  
271  
272  
266  
267  
308  
296  
286  
300  
304  
298  
295  
301  
294  
288  
321  
297  
311  
287  
293  
290  
284  
273  
291  
302  
274  
322  
267  
246  
319  
291  
292  
404  
391  
291  
264  
275  
279

243  
270  
267  
274  
282  
271  
244  
275  
281  
266  
266  
245  
269  
244  
266  
309  
264  
263  
290  
266  
301  
294  
280  
218  
235  
218  
405  
396  
374  
388  
396  
639  
680  
335  
210  
301  
318  
296  
302  
365  
314  
314  
206  
336  
356  
276

293  
271  
238  
406  
389  
322  
310  
274  
292  
274  
251  
246  
164  
145  
291  
246  
258  
283  
179  
309  
309  
312  
283  
258  
144  
259  
307  
261  
314  
296  
312  
293  
282  
314  
301  
318  
299  
302  
169  
309  
283  
254  
308  
283  
317  
312

302  
251  
242  
251  
265  
354  
377  
261  
406  
258  
274  
314  
277  
267  
261  
277  
295  
256  
251  
283  
256  
283  
267  
268  
310  
310  
293  
291  
296  
260  
228  
172  
301  
333  
239  
155  
273  
318  
277  
293  
290  
290  
217  
217  
277  
308

264  
368  
365  
325  
308  
314  
298  
146  
318  
298  
306  
302  
301  
239  
331  
331  
145  
145  
296  
294  
292  
271  
270  
299  
297  
272  
256  
302  
257  
303  
270  
298  
291  
314  
266  
258  
291  
346  
302  
225  
149  
264  
258  
180  
266  
266

255  
235  
241  
264  
157  
254  
243  
252  
242  
241  
251  
241  
321  
300  
405  
218  
406  
389  
290  
181  
385  
252  
263  
265  
281  
390  
283  
268  
218  
218  
285  
245  
259  
260  
301  
282  
265  
274  
261  
277  
264  
265  
264  
283  
376  
269



279  
148  
270  
269  
269  
258  
304  
218  
218  
264  
171  
271  
301  
146  
151  
151  
243  
272  
296  
268  
246  
273  
298  
315  
315  
315  
273  
266  
396  
288  
252  
284  
396  
396  
293  
293  
293  
293  
316  
302  
316  
319  
271  
254  
244  
283

253  
268  
265  
283  
270  
268  
298  
252  
252  
313  
252  
231  
279  
279  
304  
304  
304  
304  
301  
291  
294  
387  
303  
387  
298  
277  
281  
277  
442  
295  
295  
319  
396  
184  
291  
184  
271  
139  
301  
296  
295  
413  
292  
292  
303  
155

309  
225  
289  
303  
265  
301  
268  
288  
163  
299  
268  
254  
650  
200  
324  
287  
287  
656  
271  
269  
268  
225  
153  
394  
402  
284  
282  
402  
290  
402  
248  
312  
265  
152  
147  
296  
394  
388  
286  
656  
274  
385  
656  
239  
299  
401

401  
133  
258  
258  
260  
312  
320  
382  
640  
656  
274  
264  
289  
296  
280  
277  
146  
149  
290  
283  
289  
300  
155  
301  
387  
304  
260  
265  
260  
283  
184  
184  
293  
640  
184  
270  
266  
184  
301  
303  
290  
305  
303  
294  
290  
420

662  
640  
320  
317  
396  
386  
247  
260  
283  
261  
396  
260  
137  
305  
300  
304  
270  
274  
144  
160  
301  
319  
305  
304  
294  
301  
274  
157  
144  
304  
267  
278  
304  
442  
269  
295  
157  
297  
304  
304  
304  
267  
276  
178  
177  
155

178  
155  
177  
657  
228  
216  
392  
214  
392  
409  
228  
606  
281  
244  
267  
277  
263  
281  
273  
267  
236  
263  
281  
266  
244  
252  
271  
264  
276  
266  
226  
263  
281  
276  
282  
280  
270  
252  
266  
266  
320  
317  
318  
301  
290  
331

375  
396  
291  
304  
300  
317  
294  
286  
297  
306  
304  
313  
407  
391  
291  
294  
302  
301  
378  
317  
340  
318  
290  
301  
301  
331  
295  
320  
293  
299  
294  
322  
396  
291  
302  
294  
644  
317  
331  
317  
294  
293  
345  
294  
318  
304

396  
294  
657  
326  
311  
293  
317  
294  
294  
312  
298  
381  
396  
639  
296  
311  
320  
311  
338  
300  
313  
317  
301  
318  
396  
313  
294  
605  
410  
410  
606  
410  
662  
410  
639  
410  
404  
614  
424  
404  
410  
277  
258  
283  
294  
296



367  
333  
308  
293  
255  
330  
301  
346  
291  
298  
293  
299  
320  
304  
315  
244  
242  
308  
307  
302  
302  
204  
333  
302  
318  
309  
314  
270  
237  
252  
331  
244  
238  
242  
296  
249  
252  
251  
238  
235  
262  
265  
321  
277  
382  
406

405  
385  
315  
268  
268  
288  
265  
268  
266  
283  
274  
269  
266  
293  
274  
260  
245  
254  
310  
283  
264  
157  
283  
344  
290  
264  
305  
309  
299  
337  
294  
148  
251  
388  
256  
269  
257  
267  
288  
290  
299  
317  
345  
337  
301  
299

347  
342  
397  
293  
257  
282  
276  
251  
227  
362  
295  
388  
386  
445  
296  
256  
256  
257  
252  
287  
269  
371  
266  
367  
218  
218  
301  
271  
305  
265  
262  
267  
288  
268  
315  
225  
325  
266  
266  
252  
293  
293  
279  
254  
259  
250

291  
291  
244  
266  
428  
442  
244  
252  
252  
300  
279  
279  
304  
304  
250  
387  
303  
387  
253  
277  
239  
273  
184  
420  
287  
295  
301  
245  
274  
283  
388  
163  
301  
301  
275  
267  
267  
282  
248  
297  
262  
171  
260  
394  
286  
225

339  
365  
296  
258  
269  
394  
404  
402  
268  
288  
371  
150  
396  
327  
252  
184  
270  
184  
367  
640  
299  
601  
301  
296  
309  
351  
657  
212  
258  
640  
255  
391  
157  
153  
304  
305  
269  
297  
287  
144  
300  
274  
268  
651  
219  
639

404  
281  
303  
276  
252  
267  
298  
266  
281  
303  
267  
266

---

l). Novel genes <90% amino acid

## Closest blasthit

---

AMP48593.1 CARB-PSE [uncultured bacterium]  
WP\_034033273.1 AAC(3)-I family aminoglycoside N-acetyltransferase [*Pseudomonas aeruginosa*]  
WP\_010792467.1 MULTISPECIES: aminoglycoside N-acetyltransferase AAC(3)-Ib [Gammaproteobacteria]  
EGQ3237364.1 aminoglycoside N-acetyltransferase AAC(6')-Ie [*Staphylococcus pseudintermedius*]  
WP\_117833108.1 MULTISPECIES: GNAT family N-acetyltransferase [*Roseburia*]  
WP\_153568177.1 AAC(6')-Ighjkrstuvwx family aminoglycoside N-acetyltransferase [*Acinetobacter haemolyticus*]  
HBA02228.1 GNAT family N-acetyltransferase [*Ruminococcus* sp.]  
WP\_240081656.1 aminoglycoside O-phosphotransferase APH(2'')-Ia, partial [*Enterococcus faecium*]  
WP\_001096887.1 MULTISPECIES: aminoglycoside O-phosphotransferase APH(3')-IIIa [Bacteria]  
WP\_000422633.1 MULTISPECIES: aminoglycoside O-phosphotransferase APH(3')-VIb [Proteobacteria]  
WP\_055068576.1 MULTISPECIES: aminoglycoside 3'-phosphotransferase [*Roseburia*]  
CAD2016259.1 Aminoglycoside 3'-phosphotransferase, partial [*Enterobacter cloacae*]  
QIE40729.1 APH(6) family putative aminoglycoside O-phosphotransferase [Rhodobacteraceae bacterium SC52]  
WP\_028030786.1 MULTISPECIES: RCP family class A beta-lactamase [Rhodobacteraceae]  
WP\_254015947.1 class A beta-lactamase, subclass A2 [*Bacteroides ovatus*]  
BBQ55396.1 class A beta-lactamase [*Aeromonas veronii*]  
AOA60293.1 class A beta-lactamase [uncultured bacterium]  
WP\_001100753.1 MULTISPECIES: inhibitor-resistant extended-spectrum class A beta-lactamase PER-1 [Gammaproteobacteria]  
WP\_015589625.1 MULTISPECIES: RTG family carbenicillin-hydrolyzing class A beta-lactamase CARB-16 [Proteobacteria]  
WP\_227806170.1 class A beta-lactamase, subclass A2 [*Parabacteroides distasonis*]  
WP\_000027057.1 MULTISPECIES: broad-spectrum class A beta-lactamase TEM-1 [Bacteria]  
WP\_004339683.1 MULTISPECIES: CfxA family broad-spectrum class A beta-lactamase [Bacteroidota]  
WP\_004327564.1 class A beta-lactamase, subclass A2 [*Alistipes putredinis*]  
MCH3945785.1 MBL fold metallo-hydrolase [Lachnospiraceae bacterium]  
QLO40532.1 beta-lactamase [*Klebsiella* sp. RHBSTW-00484]  
WP\_042649345.1 MULTISPECIES: CMY-1/MOX family class C beta-lactamase MOX-9 [Gammaproteobacteria]  
WP\_086374409.1 MULTISPECIES: MCA family class C beta-lactamase [*Acinetobacter*]  
AMP48538.1 classD [uncultured bacterium]  
MBP8205294.1 class D beta-lactamase [*Giesbergieria* sp.]  
WP\_000586782.1 MULTISPECIES: oxacillin-hydrolyzing class D beta-lactamase OXA-20 [Gammaproteobacteria]  
AMP47933.1 classD, partial [uncultured bacterium]  
WP\_004295324.1 MULTISPECIES: class D beta-lactamase OXA-347 [Bacteria]  
WP\_000846390.1 MULTISPECIES: oxacillin-hydrolyzing class D beta-lactamase OXA-10 [Proteobacteria]  
WP\_120987132.1 class D beta-lactamase [*Aliarcobacter cryaerophilus*]  
CDI28150.1 carbapenem-hydrolyzing oxacillinase, partial [*Acinetobacter pittii* 42F]  
WP\_012754353.1 MULTISPECIES: OXA-24 family carbapenem-hydrolyzing class D beta-lactamase OXA-24 [Proteobacteria]  
WP\_219869572.1 rRNA adenine N(6)-methyltransferase family protein [*Microbacterium* sp. PAMC22086]  
WP\_001038790.1 MULTISPECIES: 23S rRNA (adenine(2058)-N(6))-methyltransferase Erm(B) [Bacteria]  
WP\_005423882.1 MULTISPECIES: 16S rRNA (adenine(1518)-N(6)/adenine(1519)-N(6))-dimethyltransferase Erm [Actinomycetia]  
WP\_005390949.1 MULTISPECIES: 23S ribosomal RNA methyltransferase Erm [Actinomycetia]  
WP\_002682030.1 MULTISPECIES: 23S rRNA (adenine(2058)-N(6))-methyltransferase Erm(F) [Bacteria]  
WP\_118308821.1 23S ribosomal RNA methyltransferase Erm [*Bacteroides eggerthii*]  
WP\_000155092.1 MULTISPECIES: Mph(E) family macrolide 2'-phosphotransferase [Proteobacteria]

MBP7262500.1 Mph(E)/Mph(G) family macrolide 2'-phosphotransferase [Bacteroidia bacterium]  
WP\_038557444.1 MULTISPECIES: Mph(E)/Mph(G) family macrolide 2'-phosphotransferase [Marinilabiliales]  
WP\_078213155.1 MULTISPECIES: Mph(E)/Mph(G) family macrolide 2'-phosphotransferase [Flavobacteriales]  
AGP03376.1 AAC(3)-II, partial [Klebsiella pneumoniae]  
WP\_012537714.1 MULTISPECIES: quinolone resistance pentapeptide repeat protein QnrS2 [Gammaproteobacteria]  
WP\_000106218.1 tetracycline efflux MFS transporter Tet(A) [Klebsiella pneumoniae]  
WP\_000841446.1 MULTISPECIES: tetracycline efflux MFS transporter Tet(C) [Bacteria]  
WP\_005783159.1 MULTISPECIES: tetracycline-inactivating monooxygenase Tet(X) [Bacteria]  
TXI98365.1 MAG: tetracycline destructase [Neisseriales bacterium]  
ABB97394.1 tetracycline resistance protein [Enterococcus faecium]  
WP\_107208979.1 tetracycline resistance ribosomal protection protein Tet(W) [Streptococcus suis]  
HBO8156621.1 AAC(3)-I family aminoglycoside N-acetyltransferase [Pseudomonas aeruginosa]  
EJN7178204.1 GNAT family N-acetyltransferase [Citrobacter amalonaticus]  
AGP03376.1 AAC(3)-II, partial [Klebsiella pneumoniae]  
WP\_110165650.1 MULTISPECIES: aminoglycoside N-acetyltransferase AAC(6')-Ie, partial [Bacilli]  
WP\_195287176.1 GNAT family N-acetyltransferase [Roseburia faecis]  
WP\_117833108.1 MULTISPECIES: GNAT family N-acetyltransferase [Roseburia]  
HBA02228.1 GNAT family N-acetyltransferase [Ruminococcus sp.]  
CUP37732.1 Acetyltransferase (GNAT) family [[Eubacterium] rectale]  
WP\_227248514.1 GNAT family N-acetyltransferase [Roseburia faecis]  
WP\_010714603.1 bifunctional aminoglycoside N-acetyltransferase AAC(6')-Ie/aminoglycoside O-phosphotransferase  
WP\_002592615.1 MULTISPECIES: aminoglycoside O-phosphotransferase APH(2'')-IIa [Lachnospiraceae]  
CAD2016259.1 Aminoglycoside 3'-phosphotransferase, partial [Enterobacter cloacae]  
WP\_001096887.1 MULTISPECIES: aminoglycoside O-phosphotransferase APH(3')-IIIa [Bacteria]  
WP\_055068576.1 MULTISPECIES: aminoglycoside 3'-phosphotransferase [Roseburia]  
QIE40729.1 APH(6) family putative aminoglycoside O-phosphotransferase [Rhodobacteraceae bacterium SC52]  
MBP8038075.1 class A beta-lactamase [Prevotella sp.]  
WP\_004339683.1 MULTISPECIES: CfxA family broad-spectrum class A beta-lactamase [Bacteroidota]  
WP\_055170259.1 class A beta-lactamase, subclass A2 [Bacteroides caccae]  
WP\_086989205.1 serine hydrolase [Trichococcus flocculiformis]  
WP\_008861554.1 class A beta-lactamase [Barnesiella intestinihominis]  
ACT97465.1 HGD-1 beta-lactamase [uncultured organism]  
WP\_006555379.1 MULTISPECIES: extended-spectrum class A beta-lactamase ACI-1 [Negativicutes]  
BBQ55396.1 class A beta-lactamase [Aeromonas veronii]  
WP\_046451287.1 class A beta-lactamase, subclass A2 [Odoribacter splanchnicus]  
WP\_028030786.1 MULTISPECIES: RCP family class A beta-lactamase [Rhodobacteraceae]  
MBP8721109.1 class A beta-lactamase, subclass A2 [Tidjanibacter sp.]  
MBP8652476.1 class A beta-lactamase, subclass A2 [Alistipes sp.]  
MCB1465501.1 class A beta-lactamase [Nitratireductor sp.]  
MCH3945785.1 MBL fold metallo-hydrolase [Lachnospiraceae bacterium]  
WP\_227588532.1 MULTISPECIES: MBL fold metallo-hydrolase [Blautia]  
HCJ59310.1 MBL fold metallo-hydrolase [Faecalibacterium sp.]  
WP\_086374409.1 MULTISPECIES: MCA family class C beta-lactamase [Acinetobacter]  
ULG20519.1 Beta-lactamase [Acinetobacter nosocomialis]  
WP\_004295324.1 MULTISPECIES: class D beta-lactamase OXA-347 [Bacteria]  
WP\_000586782.1 MULTISPECIES: oxacillin-hydrolyzing class D beta-lactamase OXA-20 [Gammaproteobacteria]



MBP8205294.1 class D beta-lactamase [Giesbergeria sp.]  
AMP47200.1 classD [uncultured bacterium]  
QKE29104.1 putative class D beta-lactamase [Arcobacter acticola]  
AMP48538.1 classD [uncultured bacterium]  
OQA98182.1 Beta-lactamase OXA-2 precursor [Bacteroidetes bacterium ADurb.Bin217]  
WP\_000846390.1 MULTISPECIES: oxacillin-hydrolyzing class D beta-lactamase OXA-10 [Proteobacteria]  
WP\_120987132.1 class D beta-lactamase [Aliarcobacter cryaerophilus]  
CDI28150.1 carbapenem-hydrolyzing oxacillinase, partial [Acinetobacter pittii 42F]  
AMP47933.1 classD, partial [uncultured bacterium]  
WP\_227035317.1 23S ribosomal RNA methyltransferase Erm [Bacteroides faecis]  
MCK6541170.1 23S ribosomal RNA methyltransferase Erm [bacterium]  
WP\_219869572.1 rRNA adenine N(6)-methyltransferase family protein [Microbacterium sp. PAMC22086]  
WP\_008021360.1 MULTISPECIES: 23S ribosomal RNA methyltransferase Erm [Bacteroidales]  
WP\_002682030.1 MULTISPECIES: 23S rRNA (adenine(2058)-N(6))-methyltransferase Erm(F) [Bacteria]  
WP\_001038790.1 MULTISPECIES: 23S rRNA (adenine(2058)-N(6))-methyltransferase Erm(B) [Bacteria]  
WP\_005423882.1 MULTISPECIES: 16S rRNA (adenine(1518)-N(6)/adenine(1519)-N(6))-dimethyltransferase R  
MBO5349701.1 rRNA adenine N(6)-methyltransferase family protein [Clostridia bacterium]  
WP\_036880322.1 MULTISPECIES: 23S ribosomal RNA methyltransferase Erm [Bacteroidales]  
WP\_010539471.1 MULTISPECIES: 23S ribosomal RNA methyltransferase Erm [Bacteroidales]  
WP\_000155092.1 MULTISPECIES: Mph(E) family macrolide 2'-phosphotransferase [Proteobacteria]  
WP\_038557444.1 MULTISPECIES: Mph(E)/Mph(G) family macrolide 2'-phosphotransferase [Marinilabiliales]  
MBP7262500.1 Mph(E)/Mph(G) family macrolide 2'-phosphotransferase [Bacteroidia bacterium]  
WP\_078213155.1 MULTISPECIES: Mph(E)/Mph(G) family macrolide 2'-phosphotransferase [Flavobacteriales]  
WP\_012537714.1 MULTISPECIES: quinolone resistance pentapeptide repeat protein QnrS2 [Gammaproteobact  
WP\_012772744.1 QnrB family quinolone resistance pentapeptide repeat protein [Escherichia coli]  
WP\_000841446.1 MULTISPECIES: tetracycline efflux MFS transporter Tet(C) [Bacteria]  
WP\_000106218.1 tetracycline efflux MFS transporter Tet(A) [Klebsiella pneumoniae]  
TXI98365.1 MAG: tetracycline destructase [Neisseriales bacterium]  
WP\_005783159.1 MULTISPECIES: tetracycline-inactivating monooxygenase Tet(X) [Bacteria]  
WP\_005790841.1 MULTISPECIES: NAD(P)/FAD-dependent oxidoreductase [Bacteroidales]  
APO28173.1 ferrous iron transport protein B [uncultured bacterium]  
ERI78723.1 putative translation elongation factor G [Clostridium sp. ATCC BAA-442]  
ABB97394.1 tetracycline resistance protein [Enterococcus faecium]  
APO27487.1 ferrous iron transport protein B [uncultured bacterium]  
WP\_113842634.1 MULTISPECIES: tetracycline resistance ribosomal protection protein [Firmicutes]  
WP\_088656287.1 MULTISPECIES: tetracycline resistance ribosomal protection protein Tet(36) [Bacteroidota]  
WP\_034033273.1 AAC(3)-I family aminoglycoside N-acetyltransferase [Pseudomonas aeruginosa]  
HBO8156621.1 AAC(3)-I family aminoglycoside N-acetyltransferase [Pseudomonas aeruginosa]  
AGP03376.1 AAC(3)-II, partial [Klebsiella pneumoniae]  
EGO9274095.1 aminoglycoside N-acetyltransferase AAC(6')-Ie [Enterococcus faecalis]  
CAB5652345.1 Bifunctional AAC/APH [Pseudomonas putida]  
WP\_117833108.1 MULTISPECIES: GNAT family N-acetyltransferase [Roseburia]  
WP\_153568177.1 AAC(6')-Ighjkrstuvwx family aminoglycoside N-acetyltransferase [Acinetobacter haemolyticu  
WP\_227248514.1 GNAT family N-acetyltransferase [Roseburia faecis]  
HBA02228.1 GNAT family N-acetyltransferase [Ruminococcus sp.]  
WP\_128470137.1 MULTISPECIES: GNAT family N-acetyltransferase [Terrabacteria group]

WP\_240081656.1 aminoglycoside O-phosphotransferase APH(2'')-Ia, partial [Enterococcus faecium]  
WP\_010708503.1 MULTISPECIES: aminoglycoside O-phosphotransferase APH(2'')-IIa [Bacteria]  
WP\_001096887.1 MULTISPECIES: aminoglycoside O-phosphotransferase APH(3')-IIIa [Bacteria]  
WP\_000422633.1 MULTISPECIES: aminoglycoside O-phosphotransferase APH(3')-VIb [Proteobacteria]  
WP\_055068576.1 MULTISPECIES: aminoglycoside 3'-phosphotransferase [Roseburia]  
CAD2016259.1 Aminoglycoside 3'-phosphotransferase, partial [Enterobacter cloacae]  
QIE40729.1 APH(6) family putative aminoglycoside O-phosphotransferase [Rhodobacteraceae bacterium SC52]  
WP\_001100753.1 MULTISPECIES: inhibitor-resistant extended-spectrum class A beta-lactamase PER-1 [Gamma]  
AMP51956.1 CblA [uncultured bacterium]  
AOA60293.1 class A beta-lactamase [uncultured bacterium]  
WP\_028030786.1 MULTISPECIES: RCP family class A beta-lactamase [Rhodobacteraceae]  
WP\_149947951.1 class A beta-lactamase, subclass A2 [Bacteroides cellulosilyticus]  
WP\_086989205.1 serine hydrolase [Trichococcus flocculiformis]  
WP\_055256788.1 class A beta-lactamase, subclass A2 [Bacteroides caccae]  
WP\_063857830.1 MULTISPECIES: extended-spectrum class A beta-lactamase BEL-1 [Gammaproteobacteria]  
WP\_032567550.1 CepA family extended-spectrum class A beta-lactamase [Bacteroides fragilis]  
WP\_004339683.1 MULTISPECIES: CfxA family broad-spectrum class A beta-lactamase [Bacteroidota]  
WP\_015589625.1 MULTISPECIES: RTG family carbenicillin-hydrolyzing class A beta-lactamase CARB-16 [Pr  
MCC6940111.1 serine hydrolase [Novosphingobium sp.]  
WP\_046403513.1 class A beta-lactamase, subclass A2 [Odoribacter splanchnicus]  
WP\_141418823.1 class A beta-lactamase [Alistipes communis]  
MBP8038075.1 class A beta-lactamase [Prevotella sp.]  
TAH91353.1 SHV family class A beta-lactamase [Klebsiella pneumoniae]  
WP\_000027057.1 MULTISPECIES: broad-spectrum class A beta-lactamase TEM-1 [Bacteria]  
BBQ55396.1 class A beta-lactamase [Aeromonas veronii]  
WP\_006555379.1 MULTISPECIES: extended-spectrum class A beta-lactamase ACI-1 [Negativicutes]  
MBS1939435.1 class A beta-lactamase, subclass A2 [Bacteroidetes bacterium]  
WP\_227588532.1 MULTISPECIES: MBL fold metallo-hydrolase [Blautia]  
MCH3945785.1 MBL fold metallo-hydrolase [Lachnospiraceae bacterium]  
QLO40532.1 beta-lactamase [Klebsiella sp. RHBSTW-00484]  
WP\_042649345.1 MULTISPECIES: CMY-1/MOX family class C beta-lactamase MOX-9 [Gammaproteobacteri  
EIU1367781.1 class D beta-lactamase [Pseudomonas aeruginosa]  
EIU5375759.1 OXA-10 family class D beta-lactamase [Pseudomonas aeruginosa]  
WP\_011013281.1 MULTISPECIES: oxacillin-hydrolyzing class D beta-lactamase NPS-1 [Proteobacteria]  
WP\_120987132.1 class D beta-lactamase [Aliarcobacter cryaerophilus]  
WP\_000586782.1 MULTISPECIES: oxacillin-hydrolyzing class D beta-lactamase OXA-20 [Gammaproteobacter  
PKQ64175.1 class D beta-lactamase [Labilibaculum filiforme]  
WP\_004295324.1 MULTISPECIES: class D beta-lactamase OXA-347 [Bacteria]  
AMP48538.1 classD [uncultured bacterium]  
CDI28150.1 carbapenem-hydrolyzing oxacillinase, partial [Acinetobacter pittii 42F]  
AMP47933.1 classD, partial [uncultured bacterium]  
WP\_012754353.1 MULTISPECIES: OXA-24 family carbapenem-hydrolyzing class D beta-lactamase OXA-24 [Pr  
MBP8205294.1 class D beta-lactamase [Giesbergeria sp.]  
WP\_002682030.1 MULTISPECIES: 23S rRNA (adenine(2058)-N(6))-methyltransferase Erm(F) [Bacteria]  
WP\_001038790.1 MULTISPECIES: 23S rRNA (adenine(2058)-N(6))-methyltransferase Erm(B) [Bacteria]  
WP\_219869572.1 rRNA adenine N(6)-methyltransferase family protein [Microbacterium sp. PAMC22086]

WP\_118308821.1 23S ribosomal RNA methyltransferase Erm [Bacteroides eggerthii]  
WP\_182048909.1 MULTISPECIES: 23S ribosomal RNA methyltransferase Erm [Actinomycetia]  
WP\_005423882.1 MULTISPECIES: 16S rRNA (adenine(1518)-N(6)/adenine(1519)-N(6))-dimethyltransferase R  
WP\_130108831.1 MULTISPECIES: 23S ribosomal RNA methyltransferase Erm [Actinomycetia]  
WP\_036880322.1 MULTISPECIES: 23S ribosomal RNA methyltransferase Erm [Bacteroidales]  
WP\_007286427.1 MULTISPECIES: 23S rRNA (adenine(2058)-N(6))-methyltransferase Erm(Q) [Eubacteriales]  
EJA2650198.1 23S ribosomal RNA methyltransferase Erm [Pseudomonas aeruginosa]  
MBO5349701.1 rRNA adenine N(6)-methyltransferase family protein [Clostridia bacterium]  
WP\_000155092.1 MULTISPECIES: Mph(E) family macrolide 2'-phosphotransferase [Proteobacteria]  
WP\_038557444.1 MULTISPECIES: Mph(E)/Mph(G) family macrolide 2'-phosphotransferase [Marinilabiliales]  
WP\_000219391.1 MULTISPECIES: Mph(A) family macrolide 2'-phosphotransferase [Bacteria]  
WP\_012537714.1 MULTISPECIES: quinolone resistance pentapeptide repeat protein QnrS2 [Gammaproteobact  
WP\_000106218.1 tetracycline efflux MFS transporter Tet(A) [Klebsiella pneumoniae]  
WP\_000841446.1 MULTISPECIES: tetracycline efflux MFS transporter Tet(C) [Bacteria]  
WP\_017411290.1 MULTISPECIES: tetracycline efflux MFS transporter Tet(E) [Gammaproteobacteria]  
WP\_005783159.1 MULTISPECIES: tetracycline-inactivating monooxygenase Tet(X) [Bacteria]  
TXI98365.1 MAG: tetracycline destructase [Neisseriales bacterium]  
MBQ9662135.1 tetracycline resistance ribosomal protection protein Tet(W) [Oscillospiraceae bacterium]  
ABB97394.1 tetracycline resistance protein [Enterococcus faecium]  
ERI78723.1 putative translation elongation factor G [Clostridium sp. ATCC BAA-442]  
WP\_006440995.1 MULTISPECIES: tetracycline resistance ribosomal protection protein TetB(P) [Firmicutes]  
HBO8156621.1 AAC(3)-I family aminoglycoside N-acetyltransferase [Pseudomonas aeruginosa]  
KJM97364.1 gentamicin 3'-acetyltransferase, partial [Enterobacter hormaechei subsp. xiangfangensis]  
AGP03376.1 AAC(3)-II, partial [Klebsiella pneumoniae]  
HCC0854438.1 aminoglycoside N-acetyltransferase AAC(6')-Ie [Enterococcus faecium]  
WP\_117833108.1 MULTISPECIES: GNAT family N-acetyltransferase [Roseburia]  
HBA02228.1 GNAT family N-acetyltransferase [Ruminococcus sp.]  
WP\_227248514.1 GNAT family N-acetyltransferase [Roseburia faecis]  
WP\_153568177.1 AAC(6')-Ighjkrstuvwx family aminoglycoside N-acetyltransferase [Acinetobacter haemolyticu  
4ORK\_A Crystal Structure of the Phosphotransferase Domain of the Bifunctional Aminoglycoside Resistance En  
CAD2016259.1 Aminoglycoside 3'-phosphotransferase, partial [Enterobacter cloacae]  
WP\_001096887.1 MULTISPECIES: aminoglycoside O-phosphotransferase APH(3')-IIIa [Bacteria]  
QIE40729.1 APH(6) family putative aminoglycoside O-phosphotransferase [Rhodobacteraceae bacterium SC52]  
ACT97465.1 HGD-1 beta-lactamase [uncultured organism]  
WP\_004339683.1 MULTISPECIES: CfxA family broad-spectrum class A beta-lactamase [Bacteroidota]  
WP\_166159251.1 class A beta-lactamase [Acidovorax sp. HDW3]  
BBQ55396.1 class A beta-lactamase [Aeromonas veronii]  
WP\_028030786.1 MULTISPECIES: RCP family class A beta-lactamase [Rhodobacteraceae]  
WP\_004320670.1 MULTISPECIES: class A beta-lactamase, subclass A2 [Bacteroides]  
MBP8038075.1 class A beta-lactamase [Prevotella sp.]  
MCC6940111.1 serine hydrolase [Novosphingobium sp.]  
MCB1465501.1 class A beta-lactamase [Nitratireductor sp.]  
MBP8779047.1 class A beta-lactamase [Alicyclophilus sp.]  
WP\_004327564.1 class A beta-lactamase, subclass A2 [Alistipes putredinis]  
MCH3945785.1 MBL fold metallo-hydrolase [Lachnospiraceae bacterium]  
WP\_086374409.1 MULTISPECIES: MCA family class C beta-lactamase [Acinetobacter]

WP\_032491311.1 MULTISPECIES: OXA-1 family oxacillin-hydrolyzing class D beta-lactamase OXA-4 [Proteobacteria]

EIU5375759.1 OXA-10 family class D beta-lactamase [Pseudomonas aeruginosa]

WP\_004295324.1 MULTISPECIES: class D beta-lactamase OXA-347 [Bacteria]

MBP8205294.1 class D beta-lactamase [Giesbergeria sp.]

WP\_000085217.1 class D beta-lactamase [Acinetobacter baumannii]

WP\_000586782.1 MULTISPECIES: oxacillin-hydrolyzing class D beta-lactamase OXA-20 [Gammaproteobacteria]

AMP47933.1 classD, partial [uncultured bacterium]

WP\_032490445.1 OXA-46 family oxacillin-hydrolyzing class D beta-lactamase OXA-119 [Pseudomonas aeruginosa]

WP\_120987132.1 class D beta-lactamase [Aliarcobacter cryaerophilus]

AMP48538.1 classD [uncultured bacterium]

WP\_001038790.1 MULTISPECIES: 23S rRNA (adenine(2058)-N(6))-methyltransferase Erm(B) [Bacteria]

WP\_118308821.1 23S ribosomal RNA methyltransferase Erm [Bacteroides eggerthii]

WP\_005423882.1 MULTISPECIES: 16S rRNA (adenine(1518)-N(6)/adenine(1519)-N(6))-dimethyltransferase RmB [Bacteroidales]

WP\_036880322.1 MULTISPECIES: 23S ribosomal RNA methyltransferase Erm [Bacteroidales]

WP\_002682030.1 MULTISPECIES: 23S rRNA (adenine(2058)-N(6))-methyltransferase Erm(F) [Bacteria]

MBR2247486.1 rRNA adenine N(6)-methyltransferase family protein [Bacilli bacterium]

WP\_000155092.1 MULTISPECIES: Mph(E) family macrolide 2'-phosphotransferase [Proteobacteria]

WP\_038557444.1 MULTISPECIES: Mph(E)/Mph(G) family macrolide 2'-phosphotransferase [Marinilabiliales]

MBP6408896.1 Mph(B) family macrolide 2'-phosphotransferase [Fusobacteriaceae bacterium]

WP\_000841446.1 MULTISPECIES: tetracycline efflux MFS transporter Tet(C) [Bacteria]

WP\_000106218.1 tetracycline efflux MFS transporter Tet(A) [Klebsiella pneumoniae]

TXI98365.1 MAG: tetracycline destructase [Neisseriales bacterium]

WP\_005783159.1 MULTISPECIES: tetracycline-inactivating monooxygenase Tet(X) [Bacteria]

ABB97394.1 tetracycline resistance protein [Enterococcus faecium]

WP\_138721012.1 tetracycline resistance ribosomal protection protein Tet(W) [Eubacterium maltosivorans]

HBO8156621.1 AAC(3)-I family aminoglycoside N-acetyltransferase [Pseudomonas aeruginosa]

WP\_010792467.1 MULTISPECIES: aminoglycoside N-acetyltransferase AAC(3)-Ib [Gammaproteobacteria]

AGP03376.1 AAC(3)-II, partial [Klebsiella pneumoniae]

KZM11363.1 aminoglycoside adenylyltransferase [Pseudomonas aeruginosa]

WP\_065217783.1 GNAT family N-acetyltransferase [Clostridioides difficile]

WP\_153568177.1 AAC(6')-Ighjkrstuvw family aminoglycoside N-acetyltransferase [Acinetobacter haemolyticus]

WP\_117833108.1 MULTISPECIES: GNAT family N-acetyltransferase [Roseburia]

HBA02228.1 GNAT family N-acetyltransferase [Ruminococcus sp.]

WP\_262313883.1 GNAT family N-acetyltransferase [Klebsiella quasipneumoniae]

WP\_002289795.1 MULTISPECIES: aminoglycoside N-acetyltransferase AAC(6')-Ii [Enterococcus]

WP\_240081656.1 aminoglycoside O-phosphotransferase APH(2'')-Ia, partial [Enterococcus faecium]

CAD2016259.1 Aminoglycoside 3'-phosphotransferase, partial [Enterobacter cloacae]

WP\_055068576.1 MULTISPECIES: aminoglycoside 3'-phosphotransferase [Roseburia]

WP\_000422633.1 MULTISPECIES: aminoglycoside O-phosphotransferase APH(3')-VIb [Proteobacteria]

WP\_000018326.1 MULTISPECIES: aminoglycoside O-phosphotransferase APH(3')-Ia [Bacteria]

WP\_001096887.1 MULTISPECIES: aminoglycoside O-phosphotransferase APH(3')-IIIa [Bacteria]

WP\_118435663.1 class A beta-lactamase, subclass A2 [Bacteroides cellulosilyticus]

AMP53257.1 CfxA [uncultured bacterium]

WP\_000027057.1 MULTISPECIES: broad-spectrum class A beta-lactamase TEM-1 [Bacteria]

WP\_120079028.1 class A beta-lactamase, subclass A2 [Bacteroides sp. OF03-11BH]

QCO89460.1 BlaCARB-2 [Escherichia coli]

WP\_004339683.1 MULTISPECIES: CfxA family broad-spectrum class A beta-lactamase [Bacteroidota]  
WP\_046451287.1 class A beta-lactamase, subclass A2 [Odoribacter splanchnicus]  
CDA71336.1 putative uncharacterized protein [Bacteroides coprocola CAG:162]  
WP\_151720985.1 RCP family class A beta-lactamase [Gemmobacter serpentinus]  
WP\_021892713.1 class A beta-lactamase [Barnesiella intestinihominis]  
WP\_001100753.1 MULTISPECIES: inhibitor-resistant extended-spectrum class A beta-lactamase PER-1 [Gammaproteobacteria]  
WP\_143270028.1 class A beta-lactamase, subclass A2 [Bacteroides clarus]  
MBP7019807.1 class A beta-lactamase, subclass A2 [Alistipes sp.]  
WP\_227806170.1 class A beta-lactamase, subclass A2 [Parabacteroides distasonis]  
WP\_063860581.1 MULTISPECIES: subclass B1 metallo-beta-lactamase IMP-22 [Gammaproteobacteria]  
WP\_003108247.1 MULTISPECIES: subclass B1 metallo-beta-lactamase VIM-2 [Proteobacteria]  
WP\_198260390.1 HARLDQ motif MBL-fold protein [Acinetobacter bereziniae]  
WP\_042649345.1 MULTISPECIES: CMY-1/MOX family class C beta-lactamase MOX-9 [Gammaproteobacteria]  
WP\_086374409.1 MULTISPECIES: MCA family class C beta-lactamase [Acinetobacter]  
QLO40532.1 beta-lactamase [Klebsiella sp. RHBSTW-00484]  
CAE6180605.1 Beta-lactamase OXA-1, partial [Escherichia coli]  
WP\_161507793.1 MULTISPECIES: OXA-427 family carbapenem-hydrolyzing class D beta-lactamase OXA-91 [Bacteroidetes]  
AAD22145.1 oxacillinase [Klebsiella aerogenes]  
OQA98182.1 Beta-lactamase OXA-2 precursor [Bacteroidetes bacterium ADurb.Bin217]  
CDI28150.1 carbapenem-hydrolyzing oxacillinase, partial [Acinetobacter pittii 42F]  
AMP47933.1 classD, partial [uncultured bacterium]  
WP\_012754353.1 MULTISPECIES: OXA-24 family carbapenem-hydrolyzing class D beta-lactamase OXA-24 [Bacteroidetes]  
WP\_262087276.1 OXA-274 family carbapenem-hydrolyzing class D beta-lactamase [Acinetobacter sp. I-MWF]  
WP\_004295324.1 MULTISPECIES: class D beta-lactamase OXA-347 [Bacteria]  
WP\_001038790.1 MULTISPECIES: 23S rRNA (adenine(2058)-N(6))-methyltransferase Erm(B) [Bacteria]  
WP\_182048909.1 MULTISPECIES: 23S ribosomal RNA methyltransferase Erm [Actinomycetia]  
WP\_008021360.1 MULTISPECIES: 23S ribosomal RNA methyltransferase Erm [Bacteroidales]  
MCK6541170.1 23S ribosomal RNA methyltransferase Erm [bacterium]  
WP\_010539471.1 MULTISPECIES: 23S ribosomal RNA methyltransferase Erm [Bacteroidales]  
MBO5349701.1 rRNA adenine N(6)-methyltransferase family protein [Clostridia bacterium]  
WP\_000155092.1 MULTISPECIES: Mph(E) family macrolide 2'-phosphotransferase [Proteobacteria]  
WP\_000219391.1 MULTISPECIES: Mph(A) family macrolide 2'-phosphotransferase [Bacteria]  
WP\_014386803.1 MULTISPECIES: Mph(G) family macrolide 2'-phosphotransferase [Proteobacteria]  
TXI65181.1 MAG: Mph(E)/Mph(G) family macrolide 2'-phosphotransferase [Flavobacterium sp.]  
MBP7262500.1 Mph(E)/Mph(G) family macrolide 2'-phosphotransferase [Bacteroidia bacterium]  
WP\_012537714.1 MULTISPECIES: quinolone resistance pentapeptide repeat protein QnrS2 [Gammaproteobacteria]  
WP\_000841446.1 MULTISPECIES: tetracycline efflux MFS transporter Tet(C) [Bacteria]  
WP\_011899270.1 MULTISPECIES: tetracycline efflux MFS transporter Tet(E) [Gammaproteobacteria]  
EMG61192.1 tetracycline efflux protein [Salmonella enterica subsp. enterica serovar Newport str. Henan\_3]  
WP\_008651082.1 MULTISPECIES: tetracycline-inactivating monooxygenase Tet(X2) [Bacteria]  
WP\_107208979.1 tetracycline resistance ribosomal protection protein Tet(W) [Streptococcus suis]  
HBO8156621.1 AAC(3)-I family aminoglycoside N-acetyltransferase [Pseudomonas aeruginosa]  
WP\_010792467.1 MULTISPECIES: aminoglycoside N-acetyltransferase AAC(3)-Ib [Gammaproteobacteria]  
AGP03376.1 AAC(3)-II, partial [Klebsiella pneumoniae]  
WP\_195287176.1 GNAT family N-acetyltransferase [Roseburia faecis]  
KZM11363.1 aminoglycoside adenylyltransferase [Pseudomonas aeruginosa]

WP\_262313883.1 GNAT family N-acetyltransferase [Klebsiella quasipneumoniae]  
EAC1778952.1 GNAT family N-acetyltransferase [Campylobacter coli]  
WP\_153568177.1 AAC(6')-Ighjkrstuvwx family aminoglycoside N-acetyltransferase [Acinetobacter haemolyticus]  
WP\_065217783.1 GNAT family N-acetyltransferase [Clostridioides difficile]  
WP\_117833108.1 MULTISPECIES: GNAT family N-acetyltransferase [Roseburia]  
WP\_005202238.1 MULTISPECIES: AAC(6')-Ighjkrstuvwx family aminoglycoside N-acetyltransferase [Acinetobacter]  
WP\_002289795.1 MULTISPECIES: aminoglycoside N-acetyltransferase AAC(6')-Ii [Enterococcus]  
WP\_240081656.1 aminoglycoside O-phosphotransferase APH(2'')-Ia, partial [Enterococcus faecium]  
WP\_001096887.1 MULTISPECIES: aminoglycoside O-phosphotransferase APH(3')-IIIa [Bacteria]  
WP\_000018326.1 MULTISPECIES: aminoglycoside O-phosphotransferase APH(3')-Ia [Bacteria]  
WP\_055068576.1 MULTISPECIES: aminoglycoside 3'-phosphotransferase [Roseburia]  
WP\_012091421.1 MULTISPECIES: aminoglycoside 3'-phosphotransferase [Brucella]  
CAD2016259.1 Aminoglycoside 3'-phosphotransferase, partial [Enterobacter cloacae]  
WP\_001100753.1 MULTISPECIES: inhibitor-resistant extended-spectrum class A beta-lactamase PER-1 [Gammaproteobacteria]  
WP\_046451287.1 class A beta-lactamase, subclass A2 [Odoribacter splanchnicus]  
WP\_000027057.1 MULTISPECIES: broad-spectrum class A beta-lactamase TEM-1 [Bacteria]  
AMP50979.1 CblA [uncultured bacterium]  
pir[A49789] beta-lactamase (EC 3.5.2.6) PSE-1 - Pseudomonas aeruginosa plasmid RPL11 transposon Tn1403 [Pseudomonas aeruginosa]  
WP\_149921626.1 class A beta-lactamase, subclass A2 [Bacteroides caccae]  
BBQ55396.1 class A beta-lactamase [Aeromonas veronii]  
WP\_008861554.1 class A beta-lactamase [Barnesiella intestinihominis]  
WP\_227043252.1 class A beta-lactamase [Alistipes communis]  
AYN80769.1 SHV family beta-lactamase, partial [uncultured bacterium]  
WP\_004339683.1 MULTISPECIES: CfxA family broad-spectrum class A beta-lactamase [Bacteroidota]  
WP\_002567442.1 MULTISPECIES: class A beta-lactamase [Eubacteriales]  
WP\_237043943.1 PAU family class A beta-lactamase [Pseudomonas aeruginosa]  
WP\_012658785.1 MULTISPECIES: carbapenem-hydrolyzing class A beta-lactamase GES-5 [Proteobacteria]  
WP\_028030786.1 MULTISPECIES: RCP family class A beta-lactamase [Rhodobacteraceae]  
WP\_032748514.1 extended-spectrum class A beta-lactamase OXY-1-8 [Klebsiella michiganensis]  
WP\_006555379.1 MULTISPECIES: extended-spectrum class A beta-lactamase ACI-1 [Negativicutes]  
CDA17792.1 beta-lactamase [Acetobacter sp. CAG:267]  
MBS1939435.1 class A beta-lactamase, subclass A2 [Bacteroidetes bacterium]  
WP\_035471713.1 MULTISPECIES: class A beta-lactamase, subclass A2 [Rikenellaceae]  
WP\_004320670.1 MULTISPECIES: class A beta-lactamase, subclass A2 [Bacteroides]  
MBP8652476.1 class A beta-lactamase, subclass A2 [Alistipes sp.]  
WP\_003108247.1 MULTISPECIES: subclass B1 metallo-beta-lactamase VIM-2 [Proteobacteria]  
WP\_063860581.1 MULTISPECIES: subclass B1 metallo-beta-lactamase IMP-22 [Gammaproteobacteria]  
WP\_198260390.1 HARLDQ motif MBL-fold protein [Acinetobacter bereziniae]  
MCH3945785.1 MBL fold metallo-hydrolase [Lachnospiraceae bacterium]  
WP\_227588532.1 MULTISPECIES: MBL fold metallo-hydrolase [Blautia]  
WP\_086374409.1 MULTISPECIES: MCA family class C beta-lactamase [Acinetobacter]  
QLO40532.1 beta-lactamase [Klebsiella sp. RHBSTW-00484]  
CAE6180605.1 Beta-lactamase OXA-1, partial [Escherichia coli]  
WP\_139736287.1 class D beta-lactamase [Aeromonas caviae]  
EIU1367781.1 class D beta-lactamase [Pseudomonas aeruginosa]  
AAD22145.1 oxacillinase [Klebsiella aerogenes]

MBP8205294.1 class D beta-lactamase [Giesbergeria sp.]  
OQA98182.1 Beta-lactamase OXA-2 precursor [Bacteroidetes bacterium ADurb.Bin217]  
PKQ64175.1 class D beta-lactamase [Labilibaculum filiforme]  
WP\_004295324.1 MULTISPECIES: class D beta-lactamase OXA-347 [Bacteria]  
AMP47933.1 classD, partial [uncultured bacterium]  
AMP48538.1 classD [uncultured bacterium]  
HAT7527105.1 OXA-10 family class D beta-lactamase [Citrobacter koseri]  
WP\_012754353.1 MULTISPECIES: OXA-24 family carbapenem-hydrolyzing class D beta-lactamase OXA-24 [Bacteria]  
WP\_262087276.1 OXA-274 family carbapenem-hydrolyzing class D beta-lactamase [Acinetobacter sp. I-MWF]  
AMP47200.1 classD [uncultured bacterium]  
MCK6541170.1 23S ribosomal RNA methyltransferase Erm [bacterium]  
WP\_001038790.1 MULTISPECIES: 23S rRNA (adenine(2058)-N(6))-methyltransferase Erm(B) [Bacteria]  
WP\_182048909.1 MULTISPECIES: 23S ribosomal RNA methyltransferase Erm [Actinomycetia]  
WP\_008021360.1 MULTISPECIES: 23S ribosomal RNA methyltransferase Erm [Bacteroidales]  
WP\_015431539.1 MULTISPECIES: 23S rRNA (adenine(2058)-N(6))-methyltransferase Erm(F) [Bacteria]  
WP\_002571018.1 MULTISPECIES: 23S rRNA (adenine(2058)-N(6))-methyltransferase Erm(52) [Bacteria]  
WP\_219869572.1 rRNA adenine N(6)-methyltransferase family protein [Microbacterium sp. PAMC22086]  
EJA2650198.1 23S ribosomal RNA methyltransferase Erm [Pseudomonas aeruginosa]  
WP\_005423882.1 MULTISPECIES: 16S rRNA (adenine(1518)-N(6)/adenine(1519)-N(6))-dimethyltransferase Erm [Bacteria]  
WP\_010539471.1 MULTISPECIES: 23S ribosomal RNA methyltransferase Erm [Bacteroidales]  
WP\_000219391.1 MULTISPECIES: Mph(A) family macrolide 2'-phosphotransferase [Bacteria]  
MBP7262500.1 Mph(E)/Mph(G) family macrolide 2'-phosphotransferase [Bacteroidia bacterium]  
WP\_038557444.1 MULTISPECIES: Mph(E)/Mph(G) family macrolide 2'-phosphotransferase [Marinilabiliales]  
WP\_012537714.1 MULTISPECIES: quinolone resistance pentapeptide repeat protein QnrS2 [Gammaproteobacteria]  
WP\_012772744.1 QnrB family quinolone resistance pentapeptide repeat protein [Escherichia coli]  
WP\_000415714.1 MULTISPECIES: quinolone resistance pentapeptide repeat protein QnrVC1 [Gammaproteobacteria]  
WP\_011899270.1 MULTISPECIES: tetracycline efflux MFS transporter Tet(E) [Gammaproteobacteria]  
WP\_000841446.1 MULTISPECIES: tetracycline efflux MFS transporter Tet(C) [Bacteria]  
EIW8706509.1 tetracycline efflux MFS transporter Tet(D) [Klebsiella pneumoniae]  
WP\_005783159.1 MULTISPECIES: tetracycline-inactivating monooxygenase Tet(X) [Bacteria]  
WP\_005790841.1 MULTISPECIES: NAD(P)/FAD-dependent oxidoreductase [Bacteroidales]  
WP\_088656287.1 MULTISPECIES: tetracycline resistance ribosomal protection protein Tet(36) [Bacteroidota]  
ERI78723.1 putative translation elongation factor G [Clostridium sp. ATCC BAA-442]  
WP\_225511234.1 aminoglycoside O-phosphotransferase APH(2'')-Ia [Staphylococcus aureus]  
MBB6732384.1 GNAT family N-acetyltransferase [Cohnella zeiphila]  
NOT94262.1 class A beta-lactamase, subclass A2 [Ferruginibacter sp.]  
WP\_118155791.1 class A beta-lactamase [Tabrizicola alkalilacus]  
WP\_095951366.1 class A beta-lactamase, subclass A2 [Flavobacterium sp. ACN6]  
SCY57217.1 beta-lactamase class A CARB-1 [Desulfoluna spongiiphila]  
TMU75979.1 class A beta-lactamase [Hydrogenophaga intermedia]  
WP\_166066202.1 class A beta-lactamase [Diaphorobacter sp. HDW4B]  
WP\_149648923.1 class A beta-lactamase [Azospirillum argentinense]  
MBR3555062.1 GNAT family N-acetyltransferase [Oscillospiraceae bacterium]  
WP\_027778134.1 class A beta-lactamase [Paraburkholderia caledonica]  
WP\_245961988.1 class A beta-lactamase [[Pseudomonas] urumqiensis]  
WP\_153045275.1 class A beta-lactamase [Sinorhizobium americanum]

WP\_211681140.1 class A beta-lactamase [Moritella sp. 24]  
WP\_116797844.1 subclass B1 metallo-beta-lactamase [Flavobacterium sp. 103]  
ALG03680.1 beta-lactamase [uncultured bacterium]  
WP\_058722424.1 class C beta-lactamase [Paucibacter sp. KCTC 42545]  
WP\_086206342.1 class C beta-lactamase [Acinetobacter sp. ANC 4648]  
WP\_057157847.1 class D beta-lactamase [Massilia sp. Root351]  
ACI29753.2 GcuF1/OXA-28 fusion protein [Pseudomonas aeruginosa]  
WP\_177219092.1 class D beta-lactamase [Polaromonas sp. OV174]  
WP\_092305823.1 phosphotransferase [Pseudomonas sp. NFIX28]  
MBX9912722.1 class D beta-lactamase [Pseudomonadaceae bacterium]  
QKE29104.1 putative class D beta-lactamase [Arcobacter acticola]  
WP\_235831602.1 class D beta-lactamase [Acinetobacter rongchengensis]  
WP\_241326703.1 GNAT family N-acetyltransferase [Aeromonas sp. MR7]  
QTE69679.1 GNAT family N-acetyltransferase [Clostridiales bacterium]  
MCD8490272.1 macrolide 2'-phosphotransferase [Desertifilum sp.]  
WP\_235831602.1 class D beta-lactamase [Acinetobacter rongchengensis]  
WP\_256875622.1 OXA-274 family carbapenem-hydrolyzing class D beta-lactamase OXA-944 [Acinetobacter guibaudii]  
WP\_236496866.1 OXA-46 family oxacillin-hydrolyzing class D beta-lactamase [Thiothrix winogradskyi]  
AIF25978.1 putative acetyltransferase, GNAT family [uncultured bacterium Ad\_113\_F04\_contig1]  
WP\_205587823.1 aminoglycoside 3'-phosphotransferase [Streptomyces sp. 11-1-2]  
WP\_205587823.1 aminoglycoside 3'-phosphotransferase [Streptomyces sp. 11-1-2]  
WP\_207393872.1 APH(6) family putative aminoglycoside O-phosphotransferase [Legionella taurinensis]  
WP\_096735335.1 OXA-274 family carbapenem-hydrolyzing class D beta-lactamase OXA-667 [Acinetobacter guibaudii]  
MBP7769491.1 class D beta-lactamase [Aliarcobacter sp.]  
WP\_146384574.1 AAC(3)-I family aminoglycoside N-acetyltransferase [Luteimonas marina]  
MBP7769491.1 class D beta-lactamase [Aliarcobacter sp.]  
ADI03324.1 aminoglycoside phosphotransferase [Streptomyces bingchengensis BCW-1]  
MBP7737654.1 class D beta-lactamase [Spirochaetes bacterium]  
WP\_149648923.1 class A beta-lactamase [Azospirillum argentinense]  
WP\_095951366.1 class A beta-lactamase, subclass A2 [Flavobacterium sp. ACN6]  
WP\_176950817.1 APH(6) family putative aminoglycoside O-phosphotransferase [Rhizobium rhizolycopersici]  
WP\_211681140.1 class A beta-lactamase [Moritella sp. 24]  
WP\_090023000.1 class A beta-lactamase, subclass A2 [Chryseobacterium oleae]  
WP\_166066202.1 class A beta-lactamase [Diaphorobacter sp. HDW4B]  
NOT94262.1 class A beta-lactamase, subclass A2 [Ferruginibacter sp.]  
WP\_118155791.1 class A beta-lactamase [Tabrizicola alkalilacus]  
WP\_249093128.1 class A beta-lactamase [Mediterranea sp. ET5]  
SCY57217.1 beta-lactamase class A CARB-1 [Desulfoluna spongiiphila]  
AIF25978.1 putative acetyltransferase, GNAT family [uncultured bacterium Ad\_113\_F04\_contig1]  
WP\_206662053.1 phosphotransferase [Propioniciclava tarda]  
WP\_235049612.1 phosphotransferase [Bordetella bronchiseptica]  
WP\_221080609.1 phosphotransferase [Alcaligenes faecalis]  
MBK6595569.1 class A beta-lactamase [Burkholderiales bacterium]  
WP\_040159492.1 phosphotransferase [Nigerium massiliense]  
MBO5026667.1 serine hydrolase [Bacteroidaceae bacterium]  
AMP54275.1 class A [uncultured bacterium]



AMP48593.1 CARB-PSE [uncultured bacterium]  
WP\_116797844.1 subclass B1 metallo-beta-lactamase [Flavobacterium sp. 103]  
WP\_173852188.1 BlaB/IND/MUS family subclass B1 metallo-beta-lactamase [Flavobacterium sp. 28A]  
WP\_040474030.1 BlaB/IND/MUS family subclass B1 metallo-beta-lactamase [Flavobacterium frigidis]  
WP\_155076559.1 subclass B1 metallo-beta-lactamase [Flavobacterium sp. MC2016-06]  
TXH04664.1 beta-lactamase [Rhodocyclaceae bacterium]  
WP\_086206342.1 class C beta-lactamase [Acinetobacter sp. ANC 4648]  
WP\_004861468.1 APH(3') family aminoglycoside O-phosphotransferase [Acinetobacter gernerii]  
WP\_058722424.1 class C beta-lactamase [Paucibacter sp. KCTC 42545]  
MBP7769491.1 class D beta-lactamase [Aliarcobacter sp.]  
MBX9912722.1 class D beta-lactamase [Pseudomonadaceae bacterium]  
AQY21079.1 Beta-lactamase OXA-10 precursor [Riemerella anatipestifer]  
WP\_137932453.1 aminoglycoside 3'-phosphotransferase [Mesorhizobium comanense]  
WP\_004861468.1 APH(3') family aminoglycoside O-phosphotransferase [Acinetobacter gernerii]  
MBP7737654.1 class D beta-lactamase [Spirochaetes bacterium]  
RKG38860.1 class D beta-lactamase [Acinetobacter rongchengensis]  
WP\_143223192.1 class D beta-lactamase [Acinetobacter sp. ANC 4973]  
WP\_086191974.1 aminoglycoside 3'-phosphotransferase [Acinetobacter sp. ANC 3832]  
QKE29104.1 putative class D beta-lactamase [Arcobacter acticola]  
WP\_096735335.1 OXA-274 family carbapenem-hydrolyzing class D beta-lactamase OXA-667 [Acinetobacter guibaudii]  
WP\_256875622.1 OXA-274 family carbapenem-hydrolyzing class D beta-lactamase OXA-944 [Acinetobacter guibaudii]  
WP\_236496866.1 OXA-46 family oxacillin-hydrolyzing class D beta-lactamase [Thiothrix winogradskyi]  
CAI1772374.1 Aminoglycoside/hydroxyurea antibiotic resistance kinase [Serratia marcescens]  
WP\_177219092.1 class D beta-lactamase [Polaromonas sp. OV174]  
ACI29753.2 GcuF1/OXA-28 fusion protein [Pseudomonas aeruginosa]  
ACI29753.2 GcuF1/OXA-28 fusion protein [Pseudomonas aeruginosa]  
WP\_211681140.1 class A beta-lactamase [Moritella sp. 24]  
WP\_092836705.1 class A beta-lactamase [Roseovarius lutimaris]  
WP\_095951366.1 class A beta-lactamase, subclass A2 [Flavobacterium sp. ACN6]  
WP\_086191974.1 aminoglycoside 3'-phosphotransferase [Acinetobacter sp. ANC 3832]  
TRW88068.1 GNAT family N-acetyltransferase [Mycolicibacterium sp. 018/SC-01/001]  
OLP03714.1 aminoglycoside N-acetyltransferase AAC(2')-Ib [Mycobacterium porcinum]  
NOT94262.1 class A beta-lactamase, subclass A2 [Ferruginibacter sp.]  
UXD25037.1 Beta-lactamase [Yersinia enterocolitica]  
MBP9019866.1 aminoglycoside 3'-phosphotransferase [Bacteroidales bacterium]  
WP\_183860772.1 MULTISPECIES: GNAT family N-acetyltransferase [unclassified Rhizobium]  
WP\_119762917.1 phosphotransferase [Deinococcus cavernae]  
WP\_118155791.1 class A beta-lactamase [Tabrizicola alkalilacus]  
NLI49929.1 aminoglycoside resistance protein [Propionibacterium sp.]  
WP\_166159251.1 class A beta-lactamase [Acidovorax sp. HDW3]  
WP\_223303238.1 23S ribosomal RNA methyltransferase Erm [Aeromicrobium tamlense]  
WP\_223303238.1 23S ribosomal RNA methyltransferase Erm [Aeromicrobium tamlense]  
CAF3175248.1 Aminoglycoside N(6')-acetyltransferase type 1 [Enterobacter cloacae]  
CAF3175248.1 Aminoglycoside N(6')-acetyltransferase type 1 [Enterobacter cloacae]  
NLI49929.1 aminoglycoside resistance protein [Propionibacterium sp.]  
MBK6595569.1 class A beta-lactamase [Burkholderiales bacterium]

WP\_201612657.1 23S ribosomal RNA methyltransferase Erm [Gulosibacter hominis]  
WP\_229822533.1 class A beta-lactamase [Novosphingobium arvoryzae]  
TMU75979.1 class A beta-lactamase [Hydrogenophaga intermedia]  
MBL9023700.1 class A beta-lactamase [Myxococcales bacterium]  
MBK6595569.1 class A beta-lactamase [Burkholderiales bacterium]  
WP\_166066202.1 class A beta-lactamase [Diaphorobacter sp. HDW4B]  
WP\_090023000.1 class A beta-lactamase, subclass A2 [Chryseobacterium oleae]  
MBK9234985.1 GNAT family N-acetyltransferase [Rhodoferax sp.]  
WP\_191090379.1 AAC(3) family N-acetyltransferase [Dechloromonas sp. CZR5]  
WP\_256118782.1 BKC/GPC family carbapenem-hydrolyzing class A beta-lactamase [Shinella lacus]  
WP\_203568402.1 aminoglycoside resistance protein [Aestuariimicrobium ganzense]  
SCY57217.1 beta-lactamase class A CARB-1 [Desulfoluna spongiiphila]  
WP\_076387176.1 class A beta-lactamase, subclass A2 [Kaistella chaponensis]  
QCT39786.1 methyltransferase [Candidatus Saccharibacteria bacterium oral taxon 955]  
WP\_044579084.1 aminoglycoside resistance protein [Arthrobacter alpinus]  
WP\_044579084.1 aminoglycoside resistance protein [Arthrobacter alpinus]  
WP\_068841060.1 GNAT family N-acetyltransferase [Flavobacterium chilense]  
WP\_068841060.1 GNAT family N-acetyltransferase [Flavobacterium chilense]  
WP\_188768813.1 serine hydrolase [Emticicia aquatilis]  
WP\_109740954.1 class A beta-lactamase, subclass A2 [Arcicella aurantiaca]  
MBK6595569.1 class A beta-lactamase [Burkholderiales bacterium]  
WP\_191090379.1 AAC(3) family N-acetyltransferase [Dechloromonas sp. CZR5]  
WP\_209999764.1 aminoglycoside 3'-phosphotransferase [Paeniglutamicibacter kerguelensis]  
WP\_090078406.1 class A beta-lactamase, subclass A2 [Halpernia frigidisoli]  
MBN8623456.1 class A beta-lactamase, subclass A2 [Flavobacteriales bacterium]  
MBP6768229.1 class A beta-lactamase [Reyranella sp.]  
WP\_249393889.1 aminoglycoside 3'-phosphotransferase [Deinococcus sp. QL22]  
AMP48593.1 CARB-PSE [uncultured bacterium]  
WP\_249393889.1 aminoglycoside 3'-phosphotransferase [Deinococcus sp. QL22]  
MBU0747356.1 class A beta-lactamase [Gammaproteobacteria bacterium]  
MBK6595569.1 class A beta-lactamase [Burkholderiales bacterium]  
WP\_143851291.1 class A beta-lactamase, subclass A2 [Chryseobacterium sp. SNU WT5]  
MBV8248307.1 class A beta-lactamase [Comamonas sp.]  
WP\_149648923.1 class A beta-lactamase [Azospirillum argentinense]  
WP\_218381611.1 class A beta-lactamase [Acidovorax sp. sic0104]  
HCJ31825.1 hypothetical protein [Firmicutes bacterium]  
WP\_063857835.1 PSE family carbenicillin-hydrolyzing class A beta-lactamase CARB-1 [Pseudomonas aeruginosa]  
TMU75979.1 class A beta-lactamase [Hydrogenophaga intermedia]  
WP\_232547141.1 aminoglycoside phosphotransferase family protein [Propioniciclava soli]  
WP\_116797844.1 subclass B1 metallo-beta-lactamase [Flavobacterium sp. 103]  
MCP1583202.1 aminoglycoside 6'-N-acetyltransferase I [Pseudoxanthomonas mexicana]  
WP\_051618766.1 AAC(3) family N-acetyltransferase [Deinococcus radiodurans]  
HCJ31825.1 hypothetical protein [Firmicutes bacterium]  
MBN3510432.1 GNAT family N-acetyltransferase [Mycolicibacterium septicum]  
WP\_158034955.1 AAC(3) family N-acetyltransferase [Kocuria coralli]  
WP\_158034955.1 AAC(3) family N-acetyltransferase [Kocuria coralli]

WP\_138950667.1 subclass B1 metallo-beta-lactamase [Aureibaculum algae]  
OYU65816.1 subclass B1 metallo-beta-lactamase [Cytophagaceae bacterium BCCC1]  
WP\_255075702.1 subclass B1 metallo-beta-lactamase [Lacihabitans sp. CCS-44]  
WP\_263593348.1 AAC(3) family N-acetyltransferase [Brachybacterium huguangmaarensis]  
WP\_245092121.1 MULTISPECIES: GNAT family N-acetyltransferase [Pseudoxanthomonas]  
WP\_188766146.1 subclass B1 metallo-beta-lactamase [Emticicia aquatilis]  
WP\_084059423.1 subclass B1 metallo-beta-lactamase [Cellulophaga tyrosinoxydans]  
WP\_185265411.1 subclass B1 metallo-beta-lactamase [Chryseobacterium indologenes]  
WP\_084059423.1 subclass B1 metallo-beta-lactamase [Cellulophaga tyrosinoxydans]  
RZJ80005.1 MAG: subclass B1 metallo-beta-lactamase [Flavobacterium sp.]  
WP\_040474030.1 BlaB/IND/MUS family subclass B1 metallo-beta-lactamase [Flavobacterium frigoris]  
MBI1185369.1 subclass B1 metallo-beta-lactamase [bacterium]  
WP\_246202904.1 subclass B3 metallo-beta-lactamase [Sphingomonas lacunae]  
MBH1991830.1 subclass B3 metallo-beta-lactamase [Sphingomonadaceae bacterium]  
WP\_226749031.1 beta-lactamase [Loktanella sp. TSTF-M6]  
CAF3175248.1 Aminoglycoside N(6')-acetyltransferase type 1 [Enterobacter cloacae]  
WP\_058722424.1 class C beta-lactamase [Paucibacter sp. KCTC 42545]  
WP\_086206342.1 class C beta-lactamase [Acinetobacter sp. ANC 4648]  
NHF74677.1 APH(6) family putative aminoglycoside O-phosphotransferase [Paracoccus xiamenensis]  
MBI3214810.1 GNAT family N-acetyltransferase [Mycobacterium sp.]  
WP\_163913602.1 class C beta-lactamase [Pseudomonas frederiksbergensis]  
MBN9027240.1 class D beta-lactamase [Hyphomicrobiales bacterium]  
WP\_009450042.1 class D beta-lactamase [Nitratireductor indicus]  
WP\_009450042.1 class D beta-lactamase [Nitratireductor indicus]  
WP\_217694081.1 class D beta-lactamase [Vanniella litorea]  
WP\_103310573.1 TCR/Tet family MFS transporter [Deinococcus korensis]  
WP\_061938040.1 class D beta-lactamase [Collimonas pratensis]  
WP\_063204786.1 penicillin-binding transpeptidase domain-containing protein [Bdellovibrio bacteriovorus]  
WP\_063866424.1 quinolone resistance pentapeptide repeat protein QnrS9 [Klebsiella pneumoniae]  
WP\_063866424.1 quinolone resistance pentapeptide repeat protein QnrS9 [Klebsiella pneumoniae]  
WP\_063244044.1 penicillin-binding transpeptidase domain-containing protein [Bdellovibrio bacteriovorus]  
AOF91150.1 penicillin binding transpeptidase domain protein [Sinorhizobium sp. RAC02]  
MBP7769491.1 class D beta-lactamase [Aliarcobacter sp.]  
WP\_240067735.1 OXA-198 family carbapenem-hydrolyzing class D beta-lactamase OXA-1057 [Pseudomonas sp.]  
WP\_100886243.1 OXA-229 family carbapenem-hydrolyzing class D beta-lactamase OXA-895 [Acinetobacter sp.]  
PKO51440.1 hypothetical protein CVU27\_06220 [Betaproteobacteria bacterium HGW-Betaproteobacteria-20]  
NQU50985.1 class D beta-lactamase [Bacteroidetes bacterium]  
MBX9912722.1 class D beta-lactamase [Pseudomonadaceae bacterium]  
MBP7737654.1 class D beta-lactamase [Spirochaetes bacterium]  
QKE29104.1 putative class D beta-lactamase [Arcobacter acticola]  
AMP48561.1 class D [uncultured bacterium]  
WP\_157615101.1 class D beta-lactamase [Variovorax paradoxus]  
QKE29104.1 putative class D beta-lactamase [Arcobacter acticola]  
WP\_096735335.1 OXA-274 family carbapenem-hydrolyzing class D beta-lactamase OXA-667 [Acinetobacter sp.]  
WP\_116131168.1 TCR/Tet family MFS transporter [Tropicimonas sp. IMCC34043]  
MBK9061574.1 class D beta-lactamase [Flavobacteriales bacterium]

WP\_117172494.1 class D beta-lactamase [Mariniflexile sp. TRM1-10]  
WP\_237986791.1 GNAT family N-acetyltransferase [Casaltella massiliensis]  
MBP6022806.1 class D beta-lactamase [Ferruginibacter sp.]  
WP\_228163740.1 23S ribosomal RNA methyltransferase Erm [Microbacterium testaceum]  
WP\_188548411.1 class D beta-lactamase [Hymenobacter qilianensis]  
MBP7769491.1 class D beta-lactamase [Aliarcobacter sp.]  
WP\_077687393.1 hypothetical protein [Tessaracoccus aquimaris]  
WP\_028868880.1 Qnr family pentapeptide repeat protein [Psychromonas arctica]  
WP\_028868880.1 Qnr family pentapeptide repeat protein [Psychromonas arctica]  
NTV84765.1 class D beta-lactamase [Bacteroidales bacterium]  
WP\_134652716.1 GNAT family N-acetyltransferase [Shinella sumterensis]  
WP\_177219092.1 class D beta-lactamase [Polaromonas sp. OV174]  
MCK6541170.1 23S ribosomal RNA methyltransferase Erm [bacterium]  
WP\_005259042.1 MULTISPECIES: AAC(6')-Ighjkrstuvwx family aminoglycoside N-acetyltransferase [Acinetobacter sp.]  
WP\_239809455.1 GNAT family N-acetyltransferase [Comamonas sp. B21-038]  
WP\_239809455.1 GNAT family N-acetyltransferase [Comamonas sp. B21-038]  
MCB5279398.1 23S rRNA (adenine(2058)-N(6))-methyltransferase Erm(A) [Candidatus Cloacimonetes bacterium]  
WP\_229988018.1 class D beta-lactamase [Flavobacterium sp. F-65]  
WP\_121900326.1 kinase [Tessaracoccus antarcticus]  
WP\_177219092.1 class D beta-lactamase [Polaromonas sp. OV174]  
WP\_118886044.1 class D beta-lactamase [Arcobacter suis]  
WP\_232703758.1 ESP-1 family subclass B3 metallo-beta-lactamase [Epilithonimonas sp. JDS]  
WP\_207822500.1 class A beta-lactamase [Brevundimonas pondensis]  
WP\_158387013.1 class A beta-lactamase [Comamonas testosteroni]  
WP\_158387013.1 class A beta-lactamase [Comamonas testosteroni]  
WP\_158387013.1 class A beta-lactamase [Comamonas testosteroni]  
MCI4442682.1 class D beta-lactamase [Lentimicrobium sp.]  
WP\_177219092.1 class D beta-lactamase [Polaromonas sp. OV174]  
AZM39680.1 class C beta-lactamase [Acinetobacter baumannii]  
WP\_158387013.1 class A beta-lactamase [Comamonas testosteroni]  
MBG0505245.1 subclass B1 metallo-beta-lactamase [Elizabethkingia anophelis]  
MCI6401910.1 23S ribosomal RNA methyltransferase Erm [Oscillospiraceae bacterium]  
WP\_046739866.1 class C beta-lactamase [Acinetobacter sp. AG1]  
WP\_046739866.1 class C beta-lactamase [Acinetobacter sp. AG1]  
WP\_011634137.1 class A beta-lactamase [Nitrosomonas eutropha]  
BAP35887.1 hypothetical protein AS4\_09470 [Acinetobacter guillouiae]  
MCP4561377.1 class A beta-lactamase [Bosea sp.]  
BAP35887.1 hypothetical protein AS4\_09470 [Acinetobacter guillouiae]  
WP\_092272362.1 MULTISPECIES: class A beta-lactamase [unclassified Duganella]  
WP\_121453593.1 MBL fold metallo-hydrolase [Acidovorax sp. 106]  
WP\_128990904.1 class D beta-lactamase [Arcobacter sp. CECT 8986]  
WP\_059015111.1 class D beta-lactamase [Flavobacterium psychrophilum]  
WP\_248138077.1 23S ribosomal RNA methyltransferase Erm [Micrococcus sp. EYE\_162]

ALG03687.1 beta-lactamase [uncultured bacterium]  
WP\_011372581.1 class D beta-lactamase [Sulfurimonas denitrificans]  
MBK8119780.1 class D beta-lactamase [Sulfuritalea sp.]  
WP\_248138077.1 23S ribosomal RNA methyltransferase Erm [Micrococcus sp. EYE\_162]  
WP\_068733786.1 aminoglycoside 3'-phosphotransferase [Paeniglutamibacter antarcticus]  
WP\_011372581.1 class D beta-lactamase [Sulfurimonas denitrificans]  
WP\_246093273.1 class A beta-lactamase [Zoogloea ramigera]  
MBG0505245.1 subclass B1 metallo-beta-lactamase [Elizabethkingia anophelis]  
MBG0505245.1 subclass B1 metallo-beta-lactamase [Elizabethkingia anophelis]  
HBO3867382.1 class A beta-lactamase [Pseudomonas aeruginosa]  
MBG0505245.1 subclass B1 metallo-beta-lactamase [Elizabethkingia anophelis]  
AWT08553.1 QnrVC7 [Pseudomonas aeruginosa]  
WP\_258543728.1 class D beta-lactamase [Parvicella tangerina]  
WP\_258543728.1 class D beta-lactamase [Parvicella tangerina]  
MBK7736138.1 class A beta-lactamase, subclass A2 [Saprospiraceae bacterium]  
WP\_004650739.1 class D beta-lactamase OXA-296 [Acinetobacter bohemicus]  
WP\_124447809.1 class A beta-lactamase [Paucibacter sp. KBW04]  
HBO3867382.1 class A beta-lactamase [Pseudomonas aeruginosa]  
WP\_048709300.1 MULTISPECIES: class C beta-lactamase [Proteobacteria]  
WP\_059015111.1 class D beta-lactamase [Flavobacterium psychrophilum]  
WP\_048709300.1 MULTISPECIES: class C beta-lactamase [Proteobacteria]  
WP\_246093273.1 class A beta-lactamase [Zoogloea ramigera]  
MBD3830034.1 class D beta-lactamase [Arcobacter sp.]  
WP\_241233047.1 class A beta-lactamase [Pseudomonas aeruginosa]  
MBD3830034.1 class D beta-lactamase [Arcobacter sp.]  
CQR83532.1 beta-lactamase/D-alanine carboxypeptidase [Escherichia coli K-12]  
WP\_076387176.1 class A beta-lactamase, subclass A2 [Kaistella chaponensis]  
WP\_076387176.1 class A beta-lactamase, subclass A2 [Kaistella chaponensis]  
WP\_121453593.1 MBL fold metallo-hydrolase [Acidovorax sp. 106]  
AMP47568.1 classC-AmpC [uncultured bacterium]  
WP\_027814019.1 MULTISPECIES: aminoglycoside 6'-N-acetyltransferase AacA38 [Proteobacteria]  
WP\_069796862.1 class A beta-lactamase, subclass A2 [Cloacibacterium normanense]  
WP\_027814019.1 MULTISPECIES: aminoglycoside 6'-N-acetyltransferase AacA38 [Proteobacteria]  
NLV82867.1 class D beta-lactamase [Synergistaceae bacterium]  
CAD7546396.1 aminoglycoside N(6')-acetyltransferase type 1 [Aeromonas hydrophila]  
WP\_004650739.1 class D beta-lactamase OXA-296 [Acinetobacter bohemicus]  
WP\_068372448.1 class A beta-lactamase [Rhodococcus sp. EPR-157]  
WP\_076387176.1 class A beta-lactamase, subclass A2 [Kaistella chaponensis]  
WP\_227750903.1 MULTISPECIES: tetracycline efflux MFS transporter Tet(42) [Microbacterium]  
WP\_128321378.1 BES family class A beta-lactamase [Raoultella ornithinolytica]  
WP\_128321378.1 BES family class A beta-lactamase [Raoultella ornithinolytica]  
WP\_068372448.1 class A beta-lactamase [Rhodococcus sp. EPR-157]  
MBP6216604.1 AAC(3)-I family aminoglycoside N-acetyltransferase [Luteimonas sp.]

WP\_241233047.1 class A beta-lactamase [*Pseudomonas aeruginosa*]  
WP\_005328535.1 Qnr family pentapeptide repeat protein [*Aeromonas media*]  
WP\_073290566.1 rRNA adenine N(6)-methyltransferase family protein [*Anaerospobacter mobilis*]  
WP\_237043943.1 PAU family class A beta-lactamase [*Pseudomonas aeruginosa*]  
WP\_099737147.1 class A beta-lactamase [*Comamonas* sp. 26]  
WP\_034369791.1 class A beta-lactamase [*Comamonas testosteroni*]  
WP\_242217332.1 class D beta-lactamase [*Shinella zoogloeoides*]  
WP\_099737147.1 class A beta-lactamase [*Comamonas* sp. 26]  
MCP1583202.1 aminoglycoside 6'-N-acetyltransferase I [*Pseudoxanthomonas mexicana*]  
WP\_032494864.1 MULTISPECIES: extended-spectrum class A beta-lactamase VEB-9 [Proteobacteria]  
WP\_118308872.1 class A beta-lactamase, subclass A2 [*Bacteroides eggerthii*]  
HCG1435102.1 APH(3')-II family aminoglycoside O-phosphotransferase [*Pseudomonas aeruginosa*]  
APO27487.1 ferrous iron transport protein B [uncultured bacterium]  
EAO3803148.1 AAC(6')-Ib family aminoglycoside 6'-N-acetyltransferase [*Salmonella enterica*]  
EIY98793.1 hypothetical protein HMPREF1056\_01267, partial [*Bacteroides fragilis* CL07T12C05]  
WP\_130145076.1 MULTISPECIES: class D beta-lactamase [*Acinetobacter*]  
WP\_185210947.1 class A beta-lactamase, subclass A2 [*Elizabethkingia meningoseptica*]  
TVL95669.1 MAG: tetracycline resistance ribosomal protection protein [*Candidatus Brocadia* sp. WS118]  
WP\_171537671.1 class D beta-lactamase [*Acinetobacter terrestris*]  
WP\_008863796.1 class A beta-lactamase [*Parasutterella excrementihominis*]  
WP\_055186072.1 AAC(3) family N-acetyltransferase [*Faecalibacterium prausnitzii*]  
WP\_240040201.1 CphA family subclass B2 metallo-beta-lactamase [*Aeromonas hydrophila*]  
MBP7086420.1 GNAT family N-acetyltransferase [*Enterococcus* sp.]  
WP\_092692487.1 class C beta-lactamase [*Acinetobacter kyonggiensis*]  
WP\_126037746.1 class C beta-lactamase [*Acinetobacter johnsonii*]  
WP\_004650739.1 class D beta-lactamase OXA-296 [*Acinetobacter bohemicus*]  
WP\_185209618.1 class A beta-lactamase [*Chryseobacterium* sp. C3]  
WP\_126037746.1 class C beta-lactamase [*Acinetobacter johnsonii*]  
WP\_054256025.1 class A beta-lactamase [*Acidovorax caeni*]  
WP\_126037746.1 class C beta-lactamase [*Acinetobacter johnsonii*]  
HCE14906.1 hypothetical protein [Clostridiales bacterium]  
MBP8061095.1 class A beta-lactamase, subclass A2 [*Cloacibacterium* sp.]  
HAY63238.1 hypothetical protein [Oscillospiraceae bacterium]  
WP\_180551239.1 AAC(3)-I family aminoglycoside N-acetyltransferase [*Ottowia beijingensis*]  
HBA02228.1 GNAT family N-acetyltransferase [*Ruminococcus* sp.]  
MBS6989360.1 class A beta-lactamase [*Azospirillum* sp.]  
WP\_068886293.1 class C beta-lactamase [*Acinetobacter celticus*]  
WP\_126037746.1 class C beta-lactamase [*Acinetobacter johnsonii*]  
WP\_201612657.1 23S ribosomal RNA methyltransferase Erm [*Gulosibacter hominis*]  
MCI1952108.1 tetracycline resistance ribosomal protection protein [Clostridiales bacterium]  
MBD9173422.1 aminoglycoside 3'-phosphotransferase [Clostridiales bacterium]  
WP\_174835061.1 tetracycline efflux MFS transporter Tet(G) [*Sphingomonas* sp. CL5.1]  
MCI1952108.1 tetracycline resistance ribosomal protection protein [Clostridiales bacterium]  
SWV50123.1 putative aminoglycoside N(6')-acetyltransferase (Amikacin resistance protein) (AAC(6')) [*Klebsiella* sp.]  
WP\_073290566.1 rRNA adenine N(6)-methyltransferase family protein [*Anaerospobacter mobilis*]  
ATZ64700.1 tetracycline resistance MFS efflux pump [*Acinetobacter bereziniae*]

ATZ64700.1 tetracycline resistance MFS efflux pump [Acinetobacter bereziniae]  
MBS6251134.1 GNAT family N-acetyltransferase [Clostridiales bacterium]  
BDF64221.1 beta-lactamase [Alistipes finegoldii]  
BDF64221.1 beta-lactamase [Alistipes finegoldii]  
CAO72218.1 ErmX protein, partial [Bifidobacterium animalis]  
UGK55404.1 Beta-lactamase [Raoultella ornithinolytica]  
HBW02239.1 class A beta-lactamase [Alistipes sp.]  
WP\_113995806.1 FOX/MOX family class C beta-lactamase [Aeromonas hydrophila]  
RHQ96343.1 TetM/TetW/TetO/TetS family tetracycline resistance ribosomal protection protein [Peptoclostridium]  
WP\_050696799.1 tetracycline resistance ribosomal protection protein [Anaeromassilibacillus senegalensis]  
MBD9280952.1 aminoglycoside 3'-phosphotransferase [Clostridiales bacterium]  
WP\_042016119.1 MULTISPECIES: class D beta-lactamase [Aeromonas]  
MBJ7435079.1 OXA-211 family carbapenem-hydrolyzing class D beta-lactamase [Acinetobacter sp.]  
MBS6995561.1 class A beta-lactamase [Azospirillum sp.]  
WP\_166159251.1 class A beta-lactamase [Acidovorax sp. HDW3]  
WP\_130145076.1 MULTISPECIES: class D beta-lactamase [Acinetobacter]  
HIR78125.1 GNAT family N-acetyltransferase [Candidatus Egerieenecus merdigallinarum]  
OLA09435.1 MAG: GNAT family N-acetyltransferase [Eubacterium sp. 45\_250]  
WP\_185209618.1 class A beta-lactamase [Chryseobacterium sp. C3]  
OJV32391.1 subclass B3 metallo-beta-lactamase [Sphingomonas sp. 67-36]  
NCC07651.1 methyltransferase domain-containing protein [Clostridia bacterium]  
CDC98626.1 hGB-1 beta-lactamase [Alistipes sp. CAG:268]  
WP\_187573687.1 AAC(3)-I family aminoglycoside N-acetyltransferase [Pseudoxanthomonas mexicana]  
WP\_164987546.1 aminoglycoside resistance protein [Propionocyclava flava]  
WP\_048709300.1 MULTISPECIES: class C beta-lactamase [Proteobacteria]  
MBO5349701.1 rRNA adenine N(6)-methyltransferase family protein [Clostridia bacterium]  
HBW3776649.1 APH(3')-VI family aminoglycoside O-phosphotransferase [Klebsiella pneumoniae]  
MBC8672249.1 CphA family subclass B2 metallo-beta-lactamase [Aeromonas hydrophila]  
WP\_140967323.1 APH(3')-VI family aminoglycoside O-phosphotransferase [Acinetobacter baumannii]  
OYX37921.1 hypothetical protein B7Z00\_02650 [Candidatus Saccharibacteria bacterium 32-50-10]  
HCF5415646.1 AacA4 family aminoglycoside N(6')-acetyltransferase [Pseudomonas aeruginosa]  
HCF5415646.1 AacA4 family aminoglycoside N(6')-acetyltransferase [Pseudomonas aeruginosa]  
WP\_213603971.1 subclass B3 metallo-beta-lactamase PJM-1 [Pseudoxanthomonas japonensis]  
WP\_142534931.1 tetracycline resistance ribosomal protection protein Tet(44) [Peptacetobacter hominis]  
HCF5415646.1 AacA4 family aminoglycoside N(6')-acetyltransferase [Pseudomonas aeruginosa]  
WP\_155165098.1 MBL fold metallo-hydrolase [Parasutterella excrementihominis]  
WP\_073342390.1 MULTISPECIES: 23S ribosomal RNA methyltransferase Erm [Bacteroidales]  
HCF5415646.1 AacA4 family aminoglycoside N(6')-acetyltransferase [Pseudomonas aeruginosa]  
WP\_118435663.1 class A beta-lactamase, subclass A2 [Bacteroides cellulosilyticus]  
WP\_063857819.1 carbenicillin-hydrolyzing class A beta-lactamase AER-1 [Aeromonas hydrophila]  
MBP8038075.1 class A beta-lactamase [Prevotella sp.]  
WP\_198846418.1 class A beta-lactamase [Acidovorax sp. IB03]  
MBP8061095.1 class A beta-lactamase, subclass A2 [Cloacibacterium sp.]  
WP\_022675378.1 subclass B3 metallo-beta-lactamase [Novosphingobium sp. B-7]  
MBP8038075.1 class A beta-lactamase [Prevotella sp.]  
ACT97394.1 AmpC-EcolK12 beta-lactamase [mixed culture bacterium AX\_gF3SD01\_01]

WP\_113842634.1 MULTISPECIES: tetracycline resistance ribosomal protection protein [Firmicutes]  
WP\_142534931.1 tetracycline resistance ribosomal protection protein Tet(44) [Peptacetobacter hominis]  
WP\_053397570.1 MULTISPECIES: class A beta-lactamase [Prevotella]  
AMP49121.1 classA [uncultured bacterium]  
WP\_262087325.1 beta-lactamase [Acinetobacter sp. I-MWF]  
WP\_078481254.1 MULTISPECIES: class C beta-lactamase [Pseudomonas]  
WP\_042066448.1 OXA-12 family class D beta-lactamase [Aeromonas hydrophila]  
WP\_011013281.1 MULTISPECIES: oxacillin-hydrolyzing class D beta-lactamase NPS-1 [Proteobacteria]  
MBP8061095.1 class A beta-lactamase, subclass A2 [Cloacibacterium sp.]  
WP\_009596813.1 MULTISPECIES: subclass B1 metallo-beta-lactamase [Alistipes]  
WP\_262087325.1 beta-lactamase [Acinetobacter sp. I-MWF]  
WP\_011013281.1 MULTISPECIES: oxacillin-hydrolyzing class D beta-lactamase NPS-1 [Proteobacteria]  
MBP8928750.1 AAC(3)-I family aminoglycoside N-acetyltransferase [Ottowia sp.]  
WP\_198846418.1 class A beta-lactamase [Acidovorax sp. IB03]  
AMP50979.1 CblA [uncultured bacterium]  
AMP48925.1 CblA [uncultured bacterium]  
OQA98182.1 Beta-lactamase OXA-2 precursor [Bacteroidetes bacterium ADurb.Bin217]  
AMP47204.1 classD [uncultured bacterium]  
MCI5676974.1 GNAT family N-acetyltransferase [Clostridia bacterium]  
MBS6251134.1 GNAT family N-acetyltransferase [Clostridiales bacterium]  
WP\_007213314.1 class A beta-lactamase, subclass A2 [Bacteroides cellulosilyticus]  
WP\_204461399.1 class A beta-lactamase, subclass A2 [Phocaeicola coprocola]  
WP\_198846418.1 class A beta-lactamase [Acidovorax sp. IB03]  
AHM79651.1 Beta-lactamase [Klebsiella pneumoniae 30684/NJST258\_2]  
WP\_141418823.1 class A beta-lactamase [Alistipes communis]  
MBP7261866.1 class A beta-lactamase, subclass A2 [Bacteroidia bacterium]  
WP\_140423313.1 OXA-211 family carbapenem-hydrolyzing class D beta-lactamase OXA-644 [Acinetobacter jo]  
MBP8928750.1 AAC(3)-I family aminoglycoside N-acetyltransferase [Ottowia sp.]  
WP\_227248514.1 GNAT family N-acetyltransferase [Roseburia faecis]  
WP\_063857819.1 carbenicillin-hydrolyzing class A beta-lactamase AER-1 [Aeromonas hydrophila]  
MBN8623456.1 class A beta-lactamase, subclass A2 [Flavobacteriales bacterium]  
MBS1939435.1 class A beta-lactamase, subclass A2 [Bacteroidetes bacterium]  
AMP48925.1 CblA [uncultured bacterium]  
CQR83532.1 beta-lactamase/D-alanine carboxypeptidase [Escherichia coli K-12]  
WP\_005390949.1 MULTISPECIES: 23S ribosomal RNA methyltransferase Erm [Actinomycetia]  
WP\_038557444.1 MULTISPECIES: Mph(E)/Mph(G) family macrolide 2'-phosphotransferase [Marinilabiliales]  
MBP8928750.1 AAC(3)-I family aminoglycoside N-acetyltransferase [Ottowia sp.]  
WP\_117672447.1 class A beta-lactamase, subclass A2 [Phocaeicola plebeius]  
WP\_063857819.1 carbenicillin-hydrolyzing class A beta-lactamase AER-1 [Aeromonas hydrophila]  
AMP48925.1 CblA [uncultured bacterium]  
WP\_064964607.1 class A beta-lactamase, subclass A2 [Riemerella anatipestifer]  
WP\_198846418.1 class A beta-lactamase [Acidovorax sp. IB03]  
WP\_042088348.1 OXA-229 family carbapenem-hydrolyzing class D beta-lactamase OXA-1001 [Acinetobacter b]  
WP\_002592614.1 MULTISPECIES: aminoglycoside N-acetyltransferase AAC(6)-Im [Lachnospiraceae]  
WP\_227248514.1 GNAT family N-acetyltransferase [Roseburia faecis]  
WP\_187573687.1 AAC(3)-I family aminoglycoside N-acetyltransferase [Pseudoxanthomonas mexicana]



WP\_002592614.1 MULTISPECIES: aminoglycoside N-acetyltransferase AAC(6')-Im [Lachnospiraceae]  
WP\_180551239.1 AAC(3)-I family aminoglycoside N-acetyltransferase [Ottowia beijingensis]  
WP\_227248514.1 GNAT family N-acetyltransferase [Roseburia faecis]  
AMP53591.1 tet\_ribosomol\_protect [uncultured bacterium]  
WP\_042877968.1 MULTISPECIES: Qnr family pentapeptide repeat protein [Aeromonas]  
WP\_111911606.1 Qnr family pentapeptide repeat protein [Aeromonas media]  
MBI0396458.1 beta-lactamase [Acinetobacter bereziniae]  
WP\_012634451.1 MULTISPECIES: quinolone resistance pentapeptide repeat protein QnrD1 [Bacteria]  
MBI0396458.1 beta-lactamase [Acinetobacter bereziniae]  
ACT97517.1 AmpC-HG2 beta-lactamase, partial [mixed culture bacterium CF\_gF3SD01\_19]  
WP\_042877968.1 MULTISPECIES: Qnr family pentapeptide repeat protein [Aeromonas]  
WP\_243323146.1 tetracycline resistance ribosomal protection protein Tet(Q) [Parabacteroides sp. AGMB00274]  
ABR80560.1 streptomycin resistance protein B [Klebsiella pneumoniae subsp. pneumoniae MGH 78578]  
MBP6661912.1 subclass B1 metallo-beta-lactamase [Paludibacter sp.]  
WP\_032492122.1 MULTISPECIES: OXA-5 family class D beta-lactamase OXA-129 [Proteobacteria]  
QKE29104.1 putative class D beta-lactamase [Arcobacter acticola]  
EJA2650198.1 23S ribosomal RNA methyltransferase Erm [Pseudomonas aeruginosa]  
ABR80560.1 streptomycin resistance protein B [Klebsiella pneumoniae subsp. pneumoniae MGH 78578]  
CDA17792.1 beta-lactamase [Acetobacter sp. CAG:267]  
WP\_032492122.1 MULTISPECIES: OXA-5 family class D beta-lactamase OXA-129 [Proteobacteria]  
MBS6249525.1 23S ribosomal RNA methyltransferase Erm [Clostridiales bacterium]  
MBQ1574690.1 AAC(3) family N-acetyltransferase [Clostridiales bacterium]  
ABR80560.1 streptomycin resistance protein B [Klebsiella pneumoniae subsp. pneumoniae MGH 78578]  
WP\_210015376.1 APH(6) family putative aminoglycoside O-phosphotransferase [Pseudomonas palmensis]  
KAA3160692.1 subclass B1 metallo-beta-lactamase [Alistipes finegoldii]  
WP\_035589998.1 subclass B1 metallo-beta-lactamase [Elizabethkingia anophelis]  
AMP48538.1 classD [uncultured bacterium]  
MBP8205294.1 class D beta-lactamase [Giesbergeria sp.]  
WP\_042088348.1 OXA-229 family carbapenem-hydrolyzing class D beta-lactamase OXA-1001 [Acinetobacter b]  
WP\_064964835.1 MULTISPECIES: 23S rRNA (adenine(2058)-N(6))-methyltransferase Erm(F) [Weeksellaceae]  
ABP68837.1 QnrB6 [Klebsiella pneumoniae]  
MBQ1574690.1 AAC(3) family N-acetyltransferase [Clostridiales bacterium]  
ABR80560.1 streptomycin resistance protein B [Klebsiella pneumoniae subsp. pneumoniae MGH 78578]  
CUQ16647.1 alpha-glycosidase [Phocaecicola vulgatus]  
MBN8623456.1 class A beta-lactamase, subclass A2 [Flavobacteriales bacterium]  
WP\_021980438.1 class A beta-lactamase, subclass A2 [Paraprevotella clara]  
WP\_004294668.1 class A beta-lactamase, subclass A2 [Bacteroides eggerthii]  
WP\_035589998.1 subclass B1 metallo-beta-lactamase [Elizabethkingia anophelis]  
WP\_063861588.1 OXA-46 family oxacillin-hydrolyzing class D beta-lactamase OXA-205 [Pseudomonas aeruginosa]  
WP\_073342390.1 MULTISPECIES: 23S ribosomal RNA methyltransferase Erm [Bacteroidales]  
WP\_159375860.1 class A beta-lactamase [Moraxella osloensis]  
AMP49121.1 classA [uncultured bacterium]  
MCB1465502.1 class A beta-lactamase [Nitratireductor sp.]  
MBP7261866.1 class A beta-lactamase, subclass A2 [Bacteroidia bacterium]  
MCI1731167.1 class A beta-lactamase [Prevotella sp.]  
QJA10405.1 class A extended-spectrum beta-lactamase, partial [uncultured bacterium]

EHU1405633.1 MCA family class C beta-lactamase [*Acinetobacter baumannii*]  
AMP47568.1 classC-AmpC [uncultured bacterium]  
AXQ85785.1 OXA-1-like protein [*Pseudomonas aeruginosa*]  
MBO5349701.1 rRNA adenine N(6)-methyltransferase family protein [*Clostridia* bacterium]  
AMP50979.1 CblA [uncultured bacterium]  
AMP49121.1 classA [uncultured bacterium]  
MBP7785603.1 class A beta-lactamase [*Bifidobacterium* sp.]  
ANG12681.1 beta-lactamase TEM-1 variant [synthetic construct]  
WP\_032494864.1 MULTISPECIES: extended-spectrum class A beta-lactamase VEB-9 [Proteobacteria]  
KAB3638900.1 class A beta-lactamase [*Phocaeicola vulgatus*]  
AMP48925.1 CblA [uncultured bacterium]  
MCB1465502.1 class A beta-lactamase [*Nitratireductor* sp.]  
WP\_042649345.1 MULTISPECIES: CMY-1/MOX family class C beta-lactamase MOX-9 [Gammaproteobacteri]  
QLO40532.1 beta-lactamase [*Klebsiella* sp. RHBSTW-00484]  
AXQ85785.1 OXA-1-like protein [*Pseudomonas aeruginosa*]  
TXG77876.1 macrolide 2'-phosphotransferase [*Candidatus Dojkabacteria* bacterium]  
MBP6408896.1 Mph(B) family macrolide 2'-phosphotransferase [*Fusobacteriaceae* bacterium]  
WP\_000219391.1 MULTISPECIES: Mph(A) family macrolide 2'-phosphotransferase [Bacteria]  
WP\_017411290.1 MULTISPECIES: tetracycline efflux MFS transporter Tet(E) [Gammaproteobacteria]  
AMP49121.1 classA [uncultured bacterium]  
KAB3638900.1 class A beta-lactamase [*Phocaeicola vulgatus*]  
MCB1465502.1 class A beta-lactamase [*Nitratireductor* sp.]  
MCI1731167.1 class A beta-lactamase [*Prevotella* sp.]  
WP\_008861554.1 class A beta-lactamase [*Barnesiella intestinihominis*]  
MBP7261866.1 class A beta-lactamase, subclass A2 [*Bacteroidia* bacterium]  
QJA10405.1 class A extended-spectrum beta-lactamase, partial [uncultured bacterium]  
WP\_074557906.1 class A beta-lactamase, subclass A2 [*Bacteroides ovatus*]  
WP\_159375860.1 class A beta-lactamase [*Moraxella osloensis*]  
ALG03677.1 beta-lactamase [uncultured bacterium]  
WP\_094009812.1 extended-spectrum class A beta-lactamase VEB-19 [*Escherichia coli*]  
MBP7785603.1 class A beta-lactamase [*Bifidobacterium* sp.]  
WP\_004327564.1 class A beta-lactamase, subclass A2 [*Alistipes putredinis*]  
AMP47568.1 classC-AmpC [uncultured bacterium]  
AVA17849.1 beta-lactamase OXA-1 [uncultured bacterium]  
MBP6408896.1 Mph(B) family macrolide 2'-phosphotransferase [*Fusobacteriaceae* bacterium]  
TXG77876.1 macrolide 2'-phosphotransferase [*Candidatus Dojkabacteria* bacterium]  
EFH13796.1 putative translation elongation factor G [*Clostridioides difficile* NAP07]  
WP\_181748465.1 class A beta-lactamase, subclass A2 [*Bacteroides fragilis*]  
QJA10405.1 class A extended-spectrum beta-lactamase, partial [uncultured bacterium]  
AMP49121.1 classA [uncultured bacterium]  
MBP7785603.1 class A beta-lactamase [*Bifidobacterium* sp.]  
ALG03677.1 beta-lactamase [uncultured bacterium]  
WP\_086989205.1 serine hydrolase [*Trichococcus flocculiformis*]  
WP\_141418823.1 class A beta-lactamase [*Alistipes communis*]  
MCB1465502.1 class A beta-lactamase [*Nitratireductor* sp.]  
AMP48925.1 CblA [uncultured bacterium]

AMP47568.1 classC-AmpC [uncultured bacterium]  
TXG77876.1 macrolide 2'-phosphotransferase [Candidatus Dojkabacteria bacterium]  
AMP53591.1 tet\_ribosomol\_protect [uncultured bacterium]  
EAM0355781.1 GNAT family N-acetyltransferase [Campylobacter coli]  
ACQ42051.1 CTX-M-15 [Escherichia coli]  
WP\_011270171.1 MULTISPECIES: class A beta-lactamase [Proteobacteria]  
AMP49121.1 classA [uncultured bacterium]  
WP\_117908041.1 class A beta-lactamase, subclass A2 [Bacteroides stercoris]  
WP\_179219264.1 class A beta-lactamase [Akkermansia muciniphila]  
QHV83156.1 SHV-12 [Escherichia coli]  
WP\_122364884.1 class A beta-lactamase, subclass A2 [Bacteroides caccae]  
WP\_129324144.1 ACT family cephalosporin-hydrolyzing class C beta-lactamase [Enterobacter cloacae]  
AMP47568.1 classC-AmpC [uncultured bacterium]  
WP\_146266213.1 tetracycline resistance ribosomal protection protein Tet(36) [Flavobacterium channae]  
WP\_231299036.1 MULTISPECIES: APH(2'')-Ia/If/Ih family aminoglycoside O-phosphotransferase [Eubacterial]  
ACQ42051.1 CTX-M-15 [Escherichia coli]  
WP\_053397570.1 MULTISPECIES: class A beta-lactamase [Prevotella]  
EIY98793.1 hypothetical protein HMPREF1056\_01267, partial [Bacteroides fragilis CL07T12C05]  
KAB5409037.1 class A beta-lactamase [Phocaeicola vulgatus]  
CDA71336.1 putative uncharacterized protein [Bacteroides coprocola CAG:162]  
KAB3638900.1 class A beta-lactamase [Phocaeicola vulgatus]  
WP\_181748465.1 class A beta-lactamase, subclass A2 [Bacteroides fragilis]  
WP\_195422944.1 class A beta-lactamase, subclass A2 [Bacteroides cellulosilyticus]  
WP\_063857820.1 subclass B3 metallo-beta-lactamase AIM-1 [Pseudomonas aeruginosa]  
AMP47568.1 classC-AmpC [uncultured bacterium]  
AGQ08547.1 Beta-lactamase class D [Acinetobacter baumannii BJAB0715]  
TXI65181.1 MAG: Mph(E)/Mph(G) family macrolide 2'-phosphotransferase [Flavobacterium sp.]  
APO30252.1 Ferrous iron transport protein B [uncultured bacterium]  
EPR81956.1 Tetracycline resistance protein [Acinetobacter gerneri DSM 14967 = CIP 107464 = MTCC 9824]  
EPR81956.1 Tetracycline resistance protein [Acinetobacter gerneri DSM 14967 = CIP 107464 = MTCC 9824]  
WP\_153828815.1 tetracycline resistance ribosomal protection protein Tet(Q) [Ornithobacterium rhinotracheale]  
EPR81956.1 Tetracycline resistance protein [Acinetobacter gerneri DSM 14967 = CIP 107464 = MTCC 9824]  
WP\_113842634.1 MULTISPECIES: tetracycline resistance ribosomal protection protein [Firmicutes]  
EPR81956.1 Tetracycline resistance protein [Acinetobacter gerneri DSM 14967 = CIP 107464 = MTCC 9824]  
WP\_118063230.1 tetracycline resistance ribosomal protection protein Tet(32) [Ruminococcus sp. OM08-9BH]  
EPR81956.1 Tetracycline resistance protein [Acinetobacter gerneri DSM 14967 = CIP 107464 = MTCC 9824]  
WP\_262780998.1 TCR/Tet family MFS transporter [Acinetobacter guillouiae]  
AMP53591.1 tet\_ribosomol\_protect [uncultured bacterium]  
BBI29161.1 Tetracycline resistance, MFS efflux pump [Klebsiella pneumoniae]  
WP\_262780998.1 TCR/Tet family MFS transporter [Acinetobacter guillouiae]  
EPR81956.1 Tetracycline resistance protein [Acinetobacter gerneri DSM 14967 = CIP 107464 = MTCC 9824]  
WP\_169151336.1 class D beta-lactamase [Azoarcus sp. TTM-91]  
MBP7769491.1 class D beta-lactamase [Aliarcobacter sp.]  
WP\_236496866.1 OXA-46 family oxacillin-hydrolyzing class D beta-lactamase [Thiothrix winogradskyi]  
WP\_109740954.1 class A beta-lactamase, subclass A2 [Arcicella aurantiaca]  
WP\_095951366.1 class A beta-lactamase, subclass A2 [Flavobacterium sp. ACN6]

WP\_254063395.1 class A beta-lactamase [Rhodanobacter sp. L36]  
UXD25037.1 Beta-lactamase [Yersinia enterocolitica]  
MBK6595569.1 class A beta-lactamase [Burkholderiales bacterium]  
WP\_166159251.1 class A beta-lactamase [Acidovorax sp. HDW3]  
MBP6925064.1 methyltransferase domain-containing protein [Candidatus Saccharibacteria bacterium]  
MBK6595569.1 class A beta-lactamase [Burkholderiales bacterium]  
NOT94262.1 class A beta-lactamase, subclass A2 [Ferruginibacter sp.]  
TMU75979.1 class A beta-lactamase [Hydrogenophaga intermedia]  
WP\_092836705.1 class A beta-lactamase [Roseovarius lutimaris]  
WP\_090023000.1 class A beta-lactamase, subclass A2 [Chryseobacterium oleae]  
WP\_211681140.1 class A beta-lactamase [Moritella sp. 24]  
WP\_100410627.1 class A beta-lactamase [Acidovorax sp. 69]  
WP\_027990679.1 class A beta-lactamase [Sinorhizobium meliloti]  
MBK9236258.1 class A beta-lactamase [Rhodoferax sp.]  
WP\_226344678.1 aminoglycoside phosphotransferase family protein [Agilicoccus flavus]  
OJU87767.1 hypothetical protein BGO17\_02145 [Candidatus Saccharibacteria bacterium 49-20]  
MBC7459603.1 methyltransferase domain-containing protein [Candidatus Saccharibacteria bacterium]  
MBK6595569.1 class A beta-lactamase [Burkholderiales bacterium]  
MBQ0750512.1 class A beta-lactamase [Roseovarius sp.]  
MBL0105859.1 class A beta-lactamase, subclass A2 [Ignavibacteria bacterium]  
AMP48593.1 CARB-PSE [uncultured bacterium]  
MCH9721032.1 GNAT family N-acetyltransferase [Actinomycetia bacterium]  
WP\_194659135.1 class A beta-lactamase, subclass A2 [Flavobacterium sp. LC2016-12]  
WP\_143851291.1 class A beta-lactamase, subclass A2 [Chryseobacterium sp. SNU WT5]  
WP\_191090379.1 AAC(3) family N-acetyltransferase [Dechloromonas sp. CZR5]  
WP\_224152065.1 class A beta-lactamase [Comamonas odontotermitis]  
WP\_149648923.1 class A beta-lactamase [Azospirillum argentinense]  
WP\_133599664.1 MULTISPECIES: APH(6) family putative aminoglycoside O-phosphotransferase [Raoultella]  
WP\_116797844.1 subclass B1 metallo-beta-lactamase [Flavobacterium sp. 103]  
WP\_249330969.1 subclass B1 metallo-beta-lactamase [Chryseobacterium arthrosphaerae]  
WP\_044579084.1 aminoglycoside resistance protein [Arthrobacter alpinus]  
WP\_142770653.1 BlaB/IND/MUS family subclass B1 metallo-beta-lactamase [Spirosoma sp. KCTC 42546]  
OYX53972.1 hypothetical protein B7Y92\_00935 [Candidatus Saccharibacteria bacterium 32-50-13]  
WP\_173852188.1 BlaB/IND/MUS family subclass B1 metallo-beta-lactamase [Flavobacterium sp. 28A]  
WP\_258068575.1 aminoglycoside phosphotransferase family protein [Arthrobacter sp. N199823]  
WP\_206567387.1 subclass B1 metallo-beta-lactamase [Algoriphagus aestuariicola]  
WP\_185265411.1 subclass B1 metallo-beta-lactamase [Chryseobacterium indologenes]  
WP\_040474030.1 BlaB/IND/MUS family subclass B1 metallo-beta-lactamase [Flavobacterium frigoris]  
WP\_162628159.1 subclass B1 metallo-beta-lactamase [Arcticibacterium luteifluviistationis]  
WP\_255075702.1 subclass B1 metallo-beta-lactamase [Lacihabitans sp. CCS-44]  
WP\_216784553.1 subclass B1 metallo-beta-lactamase [Cellulophaga sp. HaHaR\_3\_176]  
WP\_155076559.1 subclass B1 metallo-beta-lactamase [Flavobacterium sp. MC2016-06]  
WP\_246202904.1 subclass B3 metallo-beta-lactamase [Sphingomonas lacunae]  
MBI3217072.1 aminoglycoside resistance protein [Mycobacterium sp.]  
WP\_258444838.1 beta-lactamase [Pseudomonas sp. LS1212]  
WP\_058722424.1 class C beta-lactamase [Paucibacter sp. KCTC 42545]

WP\_226749031.1 beta-lactamase [Loktanella sp. TSTF-M6]  
WP\_163913602.1 class C beta-lactamase [Pseudomonas frederiksbergensis]  
WP\_230987056.1 class D beta-lactamase [Allorhizobium terrae]  
MBK7822271.1 AAC(3) family N-acetyltransferase [Tessaracoccus sp.]  
WP\_063204786.1 penicillin-binding transpeptidase domain-containing protein [Bdellovibrio bacteriovorus]  
WP\_188057013.1 MULTISPECIES: aminoglycoside 3'-phosphotransferase [unclassified Leucobacter]  
WP\_157615101.1 class D beta-lactamase [Variovorax paradoxus]  
HHU09552.1 kinase [Intrasporangiaceae bacterium]  
WP\_000586782.1 MULTISPECIES: oxacillin-hydrolyzing class D beta-lactamase OXA-20 [Gammaproteobacter]  
WP\_236496866.1 OXA-46 family oxacillin-hydrolyzing class D beta-lactamase [Thiothrix winogradskyi]  
MBX9912722.1 class D beta-lactamase [Pseudomonadaceae bacterium]  
WP\_116762922.1 class D beta-lactamase [Flavobacterium laiguense]  
MBK9061574.1 class D beta-lactamase [Flavobacteriales bacterium]  
PKO51440.1 hypothetical protein CVU27\_06220 [Betaproteobacteria bacterium HGW-Betaproteobacteria-20]  
MBU2019858.1 class D beta-lactamase [Bacteroidetes bacterium]  
WP\_240067735.1 OXA-198 family carbapenem-hydrolyzing class D beta-lactamase OXA-1057 [Pseudomonas o]  
MBK6366032.1 class D beta-lactamase [Polaromonas sp.]  
WP\_103457351.1 class D beta-lactamase [Stutzerimonas stutzeri]  
ACI29753.2 GcuF1/OXA-28 fusion protein [Pseudomonas aeruginosa]  
WP\_096735335.1 OXA-274 family carbapenem-hydrolyzing class D beta-lactamase OXA-667 [Acinetobacter gu]  
QKE29104.1 putative class D beta-lactamase [Arcobacter acticola]  
WP\_245092121.1 MULTISPECIES: GNAT family N-acetyltransferase [Pseudoxanthomonas]  
MCD8490272.1 macrolide 2'-phosphotransferase [Desertifilum sp.]  
WP\_082988147.1 class A beta-lactamase [Bordetella bronchialis]  
WP\_015060700.1 class A extended spectrum beta-lactamase BES-1 [Serratia marcescens]  
WP\_263593348.1 AAC(3) family N-acetyltransferase [Brachybacterium huguangmaarensis]  
MBL0105859.1 class A beta-lactamase, subclass A2 [Ignavibacteria bacterium]  
MBD5252048.1 class A beta-lactamase [Bacteroides sp.]  
WP\_079667870.1 class A beta-lactamase, subclass A2 [Soonwooa buanensis]  
WP\_245968381.1 class A beta-lactamase [Salinisphaera halophila]  
WP\_109669559.1 class A beta-lactamase [Roseicyclus mahoneyensis]  
MBD5462201.1 GNAT family N-acetyltransferase [Lachnospiraceae bacterium]  
MBS1764015.1 subclass B1 metallo-beta-lactamase [Bacteroidetes bacterium]  
WP\_202979265.1 class C beta-lactamase [Citrobacter freundii]  
MBK8803619.1 class D beta-lactamase [Fibrobacteres bacterium]  
MBK9061574.1 class D beta-lactamase [Flavobacteriales bacterium]  
WP\_101260310.1 class D beta-lactamase [Labilibaculum filiforme]  
MBK6366032.1 class D beta-lactamase [Polaromonas sp.]  
MBN8702188.1 VOC family protein [Bacteroidetes bacterium]  
WP\_015060700.1 class A extended spectrum beta-lactamase BES-1 [Serratia marcescens]  
WP\_079667870.1 class A beta-lactamase, subclass A2 [Soonwooa buanensis]  
MBO5026667.1 serine hydrolase [Bacteroidaceae bacterium]  
WP\_082988147.1 class A beta-lactamase [Bordetella bronchialis]  
WP\_245968381.1 class A beta-lactamase [Salinisphaera halophila]  
NOT94262.1 class A beta-lactamase, subclass A2 [Ferruginibacter sp.]  
WP\_158387013.1 class A beta-lactamase [Comamonas testosteroni]

MTJ93634.1 class A beta-lactamase [Desulfovibrio sp.]  
AZL61262.1 class A beta-lactamase [Tabrizicola piscis]  
WP\_116131168.1 TCR/Tet family MFS transporter [Tropicimonas sp. IMCC34043]  
WP\_158387013.1 class A beta-lactamase [Comamonas testosteroni]  
MBS6844437.1 AAC(3) family N-acetyltransferase [Clostridiales bacterium]  
WP\_158387013.1 class A beta-lactamase [Comamonas testosteroni]  
WP\_184260379.1 class A beta-lactamase [Novispirillum itersonii]  
MBS1764015.1 subclass B1 metallo-beta-lactamase [Bacteroidetes bacterium]  
QDC28540.1 subclass B2 metallo-beta-lactamase [uncultured bacterium]  
WP\_021233414.1 subclass B3 metallo-beta-lactamase [Novosphingobium lindaniclasticum]  
RZA34870.1 subclass B3 metallo-beta-lactamase [Xanthomonadaceae bacterium]  
WP\_202979265.1 class C beta-lactamase [Citrobacter freundii]  
WP\_233685854.1 beta-lactamase [Pseudomonas anguilliseptica]  
RMT84180.1 Beta-lactamase/D-alanine carboxypeptidase [Pseudomonas viridiflava]  
WP\_213338545.1 class D beta-lactamase [Chelatococcus sp. HY11]  
WP\_220231395.1 class D beta-lactamase [Hoeflea sp. WL0058]  
WP\_063244044.1 penicillin-binding transpeptidase domain-containing protein [Bdellovibrio bacteriovorus]  
WP\_101260310.1 class D beta-lactamase [Labilibaculum filiforme]  
WP\_009778337.1 aminoglycoside phosphotransferase [Janibacter sp. HTCC2649]  
WP\_241150390.1 class D beta-lactamase [Delftia lacustris]  
MBK9061574.1 class D beta-lactamase [Flavobacteriales bacterium]  
WP\_062172770.1 TCR/Tet family MFS transporter [Burkholderia sp. PAMC 26561]  
NTW91342.1 AAC(3) family N-acetyltransferase [Erysipelotrichaceae bacterium]  
WP\_132957865.1 TCR/Tet family MFS transporter [Rhizobium sp. BK251]  
WP\_028868880.1 Qnr family pentapeptide repeat protein [Psychromonas arctica]  
WP\_028868880.1 Qnr family pentapeptide repeat protein [Psychromonas arctica]  
MBW7942880.1 23S ribosomal RNA methyltransferase Erm [Candidatus Kuenenia stuttgartiensis]  
ALG03679.1 beta-lactamase class D [uncultured bacterium]  
WP\_150552526.1 class D beta-lactamase [Pandoraea soli]  
WP\_088860312.1 class D beta-lactamase [Laribacter hongkongensis]  
WP\_091746303.1 class D beta-lactamase [Propionispora vibrioides]  
MBK6366032.1 class D beta-lactamase [Polaromonas sp.]  
MBN8702188.1 VOC family protein [Bacteroidetes bacterium]  
PLW79849.1 class D beta-lactamase [Candidatus Woesearchaeota archaeon]  
WP\_158387013.1 class A beta-lactamase [Comamonas testosteroni]  
WP\_173504733.1 subclass B1 metallo-beta-lactamase [Flavobacterium sp. M31R6]  
MBK6595569.1 class A beta-lactamase [Burkholderiales bacterium]  
WP\_177219092.1 class D beta-lactamase [Polaromonas sp. OV174]  
WP\_177219092.1 class D beta-lactamase [Polaromonas sp. OV174]  
WP\_122893269.1 class D beta-lactamase [Arcobacter peruensis]  
WP\_011634137.1 class A beta-lactamase [Nitrosomonas eutropha]  
WP\_011634137.1 class A beta-lactamase [Nitrosomonas eutropha]  
WP\_118886044.1 class D beta-lactamase [Arcobacter suis]  
WP\_128990904.1 class D beta-lactamase [Arcobacter sp. CECT 8986]  
WP\_101260308.1 class D beta-lactamase [Labilibaculum filiforme]  
WP\_128990904.1 class D beta-lactamase [Arcobacter sp. CECT 8986]

AMP48575.1 CARB-PSE [uncultured bacterium]  
AMP48575.1 CARB-PSE [uncultured bacterium]  
AMP47191.1 classD [uncultured bacterium]  
WP\_099736705.1 class D beta-lactamase [Comamonas sp. 26]  
WP\_244175872.1 tetracycline efflux MFS transporter Tet(42) [Microbacterium oxydans]  
CQR83532.1 beta-lactamase/D-alanine carboxypeptidase [Escherichia coli K-12]  
MBP6661912.1 subclass B1 metallo-beta-lactamase [Paludibacter sp.]  
MBG0505245.1 subclass B1 metallo-beta-lactamase [Elizabethkingia anophelis]  
MBG0505245.1 subclass B1 metallo-beta-lactamase [Elizabethkingia anophelis]  
MBP6364397.1 subclass B3 metallo-beta-lactamase [Novosphingobium sp.]  
WP\_258543728.1 class D beta-lactamase [Parvicella tangerina]  
WP\_258543728.1 class D beta-lactamase [Parvicella tangerina]  
MBK7736138.1 class A beta-lactamase, subclass A2 [Saprospiraceae bacterium]  
MBK7736138.1 class A beta-lactamase, subclass A2 [Saprospiraceae bacterium]  
WP\_079458943.1 OXA-5 family class D beta-lactamase [Pseudomonas aeruginosa]  
WP\_048709300.1 MULTISPECIES: class C beta-lactamase [Proteobacteria]  
WP\_059015111.1 class D beta-lactamase [Flavobacterium psychrophilum]  
WP\_048709300.1 MULTISPECIES: class C beta-lactamase [Proteobacteria]  
WP\_141049904.1 class D beta-lactamase [Aliarcobacter cryaerophilus]  
MBD3830034.1 class D beta-lactamase [Arcobacter sp.]  
WP\_068733786.1 aminoglycoside 3'-phosphotransferase [Paeniglutamibacter antarcticus]  
AMP47147.1 classD, partial [uncultured bacterium]  
WP\_027814019.1 MULTISPECIES: aminoglycoside 6'-N-acetyltransferase AacA38 [Proteobacteria]  
WP\_167655841.1 class C beta-lactamase [Pseudomonas sp. B14(2022)]  
WP\_241233047.1 class A beta-lactamase [Pseudomonas aeruginosa]  
WP\_076387176.1 class A beta-lactamase, subclass A2 [Kaistella chaponensis]  
WP\_004650739.1 class D beta-lactamase OXA-296 [Acinetobacter bohemicus]  
WP\_129025753.1 subclass B1 metallo-beta-lactamase [Flavobacterium sp. YO12]  
WP\_159374988.1 class D beta-lactamase [Moraxella osloensis]  
MBP5992809.1 class D beta-lactamase [Acinetobacter sp.]  
RUP42360.1 beta-lactamase [Acinetobacter sp.]  
MCP1583202.1 aminoglycoside 6'-N-acetyltransferase I [Pseudoxanthomonas mexicana]  
WP\_185210947.1 class A beta-lactamase, subclass A2 [Elizabethkingia meningoseptica]  
WP\_185210947.1 class A beta-lactamase, subclass A2 [Elizabethkingia meningoseptica]  
MCA0335223.1 class D beta-lactamase [Bacteroidetes bacterium]  
HCB1475147.1 class D beta-lactamase [Citrobacter freundii]  
HCB1475147.1 class D beta-lactamase [Citrobacter freundii]  
MBP8161724.1 hypothetical protein [Ottowia sp.]  
MBD9173422.1 aminoglycoside 3'-phosphotransferase [Clostridiales bacterium]  
MCC6940552.1 subclass B3 metallo-beta-lactamase [Novosphingobium sp.]  
WP\_004650739.1 class D beta-lactamase OXA-296 [Acinetobacter bohemicus]  
WP\_195287176.1 GNAT family N-acetyltransferase [Roseburia faecis]  
MCI6124210.1 aminoglycoside 3'-phosphotransferase [Christensenellaceae bacterium]  
WP\_068886293.1 class C beta-lactamase [Acinetobacter celticus]  
WP\_119932702.1 23S ribosomal RNA methyltransferase Erm [Kocuria sp. CPCC 104605]  
WP\_111911606.1 Qnr family pentapeptide repeat protein [Aeromonas media]

KAB3638900.1 class A beta-lactamase [*Phocaeicola vulgatus*]  
WP\_099657070.1 MBL fold metallo-hydrolase [*Acidovorax* sp. 56]  
ACT97384.1 HGE-1 beta-lactamase [uncultured organism]  
WP\_240067734.1 OXA-198 family carbapenem-hydrolyzing class D beta-lactamase OXA-1056 [*Pseudomonas* sp.]  
WP\_076387176.1 class A beta-lactamase, subclass A2 [*Kaistella chaponensis*]  
VVN01565.1 Beta-lactamase [*Pseudomonas fluorescens*]  
WP\_086374409.1 MULTISPECIES: MCA family class C beta-lactamase [*Acinetobacter* sp.]  
WP\_126037746.1 class C beta-lactamase [*Acinetobacter johnsonii*]  
MBK7291810.1 class D beta-lactamase [Chitinophagaceae bacterium]  
MBP8061095.1 class A beta-lactamase, subclass A2 [*Cloacibacterium* sp.]  
AMP48647.1 TetA-G [uncultured bacterium]  
WP\_187573687.1 AAC(3)-I family aminoglycoside N-acetyltransferase [*Pseudoxanthomonas mexicana*]  
EIU4863518.1 beta-lactamase [*Pseudomonas aeruginosa*]  
MBH3313086.1 class A beta-lactamase [*Pseudomonas mosselii*]  
WP\_195289612.1 subclass B1 metallo-beta-lactamase [*Alistipes finegoldii*]  
HCF5415646.1 AacA4 family aminoglycoside N(6')-acetyltransferase [*Pseudomonas aeruginosa*]  
OQA98182.1 Beta-lactamase OXA-2 precursor [*Bacteroides* bacterium ADurb.Bin217]  
HCF5415646.1 AacA4 family aminoglycoside N(6')-acetyltransferase [*Pseudomonas aeruginosa*]  
WP\_126037746.1 class C beta-lactamase [*Acinetobacter johnsonii*]  
WP\_009300547.1 MULTISPECIES: tetracycline resistance ribosomal protection protein Tet(44) [Firmicutes]  
WP\_073290566.1 rRNA adenine N(6)-methyltransferase family protein [*Anaerosporebacter mobilis*]  
MCI1208181.1 tetracycline resistance ribosomal protection protein [*Treponema* sp.]  
MBP7261866.1 class A beta-lactamase, subclass A2 [*Bacteroidia* bacterium]  
WP\_122364884.1 class A beta-lactamase, subclass A2 [*Bacteroides caccae*]  
EIY98793.1 hypothetical protein HMPREF1056\_01267, partial [*Bacteroides fragilis* CL07T12C05]  
WP\_265466831.1 FOX/MOX family class C beta-lactamase [*Aeromonas salmonicida*]  
AMP53591.1 tet\_ribosomal\_protect [uncultured bacterium]  
GKN85319.1 hypothetical protein NUBL17189\_52290 [*Klebsiella pneumoniae*]  
WP\_009596813.1 MULTISPECIES: subclass B1 metallo-beta-lactamase [*Alistipes* sp.]  
WP\_059429510.1 tetracycline resistance ribosomal protection protein Tet(44) [*Campylobacter hyointestinalis*]  
QKE29104.1 putative class D beta-lactamase [*Arcobacter acticola*]  
WP\_018426326.1 MULTISPECIES: tetracycline efflux MFS transporter Tet(G) [Proteobacteria]  
MBP8928750.1 AAC(3)-I family aminoglycoside N-acetyltransferase [*Ottowia* sp.]  
MBP7086420.1 GNAT family N-acetyltransferase [*Enterococcus* sp.]  
AMP48925.1 CblA [uncultured bacterium]  
WP\_198846418.1 class A beta-lactamase [*Acidovorax* sp. IB03]  
AMP50537.1 classA, partial [uncultured bacterium]  
WP\_117672447.1 class A beta-lactamase, subclass A2 [*Phocaeicola plebeius*]  
BBE19185.1 beta-lactamase [*Aquipluma nitroreducens*]  
MCI5676974.1 GNAT family N-acetyltransferase [*Clostridia* bacterium]  
AMP50979.1 CblA [uncultured bacterium]  
CDA71336.1 putative uncharacterized protein [*Bacteroides coprocola* CAG:162]  
OQA98182.1 Beta-lactamase OXA-2 precursor [*Bacteroides* bacterium ADurb.Bin217]  
WP\_018579533.1 MULTISPECIES: tetracycline resistance ribosomal protection protein [Firmicutes]  
ABO92047.1 quinolone resistance determinant QnrA [*Aeromonas salmonicida* subsp. *salmonicida* A449]  
WP\_088656287.1 MULTISPECIES: tetracycline resistance ribosomal protection protein Tet(36) [Bacteroidota]



ULG20519.1 Beta-lactamase [Acinetobacter nosocomialis]  
ABR80560.1 streptomycin resistance protein B [Klebsiella pneumoniae subsp. pneumoniae MGH 78578]  
WP\_157057059.1 class A beta-lactamase [Herbaspirillum autotrophicum]  
CUQ16647.1 alpha-glycosidase [Phocaeicola vulgatus]  
WP\_035589998.1 subclass B1 metallo-beta-lactamase [Elizabethkingia anophelis]  
WP\_032492122.1 MULTISPECIES: OXA-5 family class D beta-lactamase OXA-129 [Proteobacteria]  
WP\_005390949.1 MULTISPECIES: 23S ribosomal RNA methyltransferase Erm [Actinomycetia]  
WP\_118158801.1 MULTISPECIES: 23S ribosomal RNA methyltransferase Erm [Bacteria]  
ABR80560.1 streptomycin resistance protein B [Klebsiella pneumoniae subsp. pneumoniae MGH 78578]  
WP\_157057059.1 class A beta-lactamase [Herbaspirillum autotrophicum]  
WP\_032492122.1 MULTISPECIES: OXA-5 family class D beta-lactamase OXA-129 [Proteobacteria]  
MCK6541170.1 23S ribosomal RNA methyltransferase Erm [bacterium]

---

d (aa) identity.

| <b>% identity</b> | <b>E-value</b> |
|-------------------|----------------|
| 66.8              | 1.12e-121      |
| 100               | 8.20e-105      |
| 100               | 7.88e-103      |
| 100               | 1.04e-188      |
| 100               | 4.25e-106      |
| 100               | 5.04e-97       |
| 100               | 1.79e-108      |
| 100               | 1.54e-263      |
| 100               | 1.04e-193      |
| 100               | 2.73e-180      |
| 100               | 3.27e-197      |
| 100               | 1.00e-197      |
| 100               | 4.57e-197      |
| 100               | 1.80e-204      |
| 100               | 1.56e-210      |
| 100               | 8.20e-202      |
| 100               | 2.18e-235      |
| 100               | 6.81e-212      |
| 100               | 6.07e-210      |
| 100               | 2.21e-217      |
| 100               | 4.97e-203      |
| 100               | 2.15e-226      |
| 100               | 6.49e-233      |
| 100               | 1.06e-220      |
| 100               | 1.73e-272      |
| 100               | 1.35e-272      |
| 100               | 2.15e-285      |
| 100               | 1.60e-196      |
| 100               | 8.55e-193      |
| 100               | 1.80e-195      |
| 100               | 3.20e-206      |
| 100               | 1.17e-195      |
| 100               | 2.17e-187      |
| 100               | 3.33e-180      |
| 100               | 1.40e-200      |
| 100               | 4.22e-194      |
| 100               | 4.12e-184      |
| 100               | 3.07e-172      |
| 100               | 1.43e-204      |
| 100               | 2.61e-203      |
| 100               | 1.31e-188      |
| 100               | 2.73e-170      |
| 100               | 1.81e-209      |

|     |           |
|-----|-----------|
| 100 | 7.69e-211 |
| 100 | 1.56e-215 |
| 100 | 8.01e-213 |
| 100 | 6.04e-214 |
| 100 | 2.65e-107 |
| 100 | 6.76e-298 |
| 100 | 1.19e-270 |
| 100 | 2.02e-283 |
| 100 | 1.67e-284 |
| 100 | 0.0       |
| 100 | 0.0       |
| 100 | 5.77e-105 |
| 100 | 1.70e-90  |
| 100 | 6.04e-214 |
| 100 | 3.24e-158 |
| 100 | 5.37e-126 |
| 100 | 4.25e-106 |
| 100 | 1.79e-108 |
| 100 | 4.16e-133 |
| 100 | 6.82e-121 |
| 100 | 7.58e-234 |
| 100 | 1.79e-215 |
| 100 | 1.00e-197 |
| 100 | 1.04e-193 |
| 100 | 3.27e-197 |
| 100 | 4.57e-197 |
| 100 | 4.57e-201 |
| 100 | 2.15e-226 |
| 100 | 1.19e-211 |
| 100 | 4.40e-221 |
| 100 | 8.68e-216 |
| 100 | 1.79e-233 |
| 100 | 5.18e-204 |
| 100 | 8.20e-202 |
| 100 | 1.22e-208 |
| 100 | 1.80e-204 |
| 100 | 5.43e-194 |
| 100 | 1.31e-232 |
| 100 | 5.18e-191 |
| 100 | 3.17e-216 |
| 100 | 2.05e-214 |
| 100 | 3.86e-224 |
| 100 | 2.15e-285 |
| 100 | 2.26e-285 |
| 100 | 1.17e-195 |
| 100 | 1.80e-195 |

|     |           |
|-----|-----------|
| 100 | 8.55e-193 |
| 100 | 2.35e-191 |
| 100 | 1.89e-188 |
| 100 | 1.60e-196 |
| 100 | 1.02e-203 |
| 100 | 2.17e-187 |
| 100 | 3.33e-180 |
| 100 | 1.40e-200 |
| 100 | 3.20e-206 |
| 100 | 3.60e-173 |
| 100 | 3.17e-175 |
| 100 | 4.12e-184 |
| 100 | 3.87e-170 |
| 100 | 1.31e-188 |
| 100 | 3.07e-172 |
| 100 | 1.43e-204 |
| 100 | 1.82e-214 |
| 100 | 2.98e-194 |
| 100 | 1.86e-188 |
| 100 | 1.81e-209 |
| 100 | 1.56e-215 |
| 100 | 7.69e-211 |
| 100 | 8.01e-213 |
| 100 | 2.65e-107 |
| 100 | 1.66e-114 |
| 100 | 1.19e-270 |
| 100 | 6.76e-298 |
| 100 | 1.67e-284 |
| 100 | 2.02e-283 |
| 100 | 1.06e-278 |
| 100 | 0.0       |
| 100 | 0.0       |
| 100 | 0.0       |
| 100 | 0.0       |
| 100 | 0.0       |
| 100 | 0.0       |
| 100 | 8.20e-105 |
| 100 | 5.77e-105 |
| 100 | 6.04e-214 |
| 100 | 7.91e-189 |
| 100 | 2.62e-176 |
| 100 | 4.25e-106 |
| 100 | 5.04e-97  |
| 100 | 6.82e-121 |
| 100 | 1.79e-108 |
| 100 | 2.58e-105 |

|     |           |
|-----|-----------|
| 100 | 1.54e-263 |
| 100 | 9.96e-210 |
| 100 | 1.04e-193 |
| 100 | 2.73e-180 |
| 100 | 3.27e-197 |
| 100 | 1.00e-197 |
| 100 | 4.57e-197 |
| 100 | 6.81e-212 |
| 100 | 2.69e-214 |
| 100 | 2.18e-235 |
| 100 | 1.80e-204 |
| 100 | 9.72e-213 |
| 100 | 9.69e-210 |
| 100 | 5.87e-212 |
| 100 | 8.93e-197 |
| 100 | 1.45e-218 |
| 100 | 2.15e-226 |
| 100 | 6.07e-210 |
| 100 | 1.76e-221 |
| 100 | 9.89e-204 |
| 100 | 7.69e-211 |
| 100 | 4.57e-201 |
| 100 | 2.41e-188 |
| 100 | 4.97e-203 |
| 100 | 8.20e-202 |
| 100 | 5.18e-204 |
| 100 | 4.60e-206 |
| 100 | 2.05e-214 |
| 100 | 1.06e-220 |
| 100 | 2.19e-284 |
| 100 | 1.02e-273 |
| 100 | 3.83e-200 |
| 100 | 4.37e-187 |
| 100 | 9.19e-186 |
| 100 | 3.33e-180 |
| 100 | 1.80e-195 |
| 100 | 1.08e-192 |
| 100 | 1.17e-195 |
| 100 | 1.60e-196 |
| 100 | 1.40e-200 |
| 100 | 3.20e-206 |
| 100 | 4.22e-194 |
| 100 | 8.55e-193 |
| 100 | 1.31e-188 |
| 100 | 3.07e-172 |
| 100 | 4.12e-184 |

|     |           |
|-----|-----------|
| 100 | 2.73e-170 |
| 100 | 2.37e-197 |
| 100 | 1.43e-204 |
| 100 | 1.53e-175 |
| 100 | 2.98e-194 |
| 100 | 1.21e-184 |
| 100 | 6.50e-192 |
| 100 | 1.82e-214 |
| 100 | 1.81e-209 |
| 100 | 1.56e-215 |
| 100 | 9.72e-213 |
| 100 | 2.65e-107 |
| 100 | 6.76e-298 |
| 100 | 1.19e-270 |
| 100 | 1.09e-282 |
| 100 | 2.02e-283 |
| 100 | 1.67e-284 |
| 100 | 0.0       |
| 100 | 0.0       |
| 100 | 0.0       |
| 100 | 0.0       |
| 100 | 5.77e-105 |
| 100 | 1.56e-89  |
| 100 | 6.04e-214 |
| 100 | 7.90e-173 |
| 100 | 4.25e-106 |
| 100 | 1.79e-108 |
| 100 | 6.82e-121 |
| 100 | 5.04e-97  |
| 100 | 3.85e-221 |
| 100 | 1.00e-197 |
| 100 | 1.04e-193 |
| 100 | 4.57e-197 |
| 100 | 1.79e-233 |
| 100 | 2.15e-226 |
| 100 | 3.93e-202 |
| 100 | 8.20e-202 |
| 100 | 1.80e-204 |
| 100 | 3.56e-191 |
| 100 | 4.57e-201 |
| 100 | 1.06e-193 |
| 100 | 1.15e-185 |
| 100 | 1.57e-203 |
| 100 | 6.49e-233 |
| 100 | 5.66e-209 |
| 100 | 2.15e-285 |

|     |           |
|-----|-----------|
| 100 | 2.26e-194 |
| 100 | 4.37e-187 |
| 100 | 1.17e-195 |
| 100 | 8.55e-193 |
| 100 | 4.92e-184 |
| 100 | 1.80e-195 |
| 100 | 3.20e-206 |
| 100 | 3.84e-186 |
| 100 | 3.33e-180 |
| 100 | 1.60e-196 |
| 100 | 3.07e-172 |
| 100 | 2.73e-170 |
| 100 | 1.43e-204 |
| 100 | 2.98e-194 |
| 100 | 1.31e-188 |
| 100 | 1.74e-176 |
| 100 | 1.81e-209 |
| 100 | 1.56e-215 |
| 100 | 2.15e-221 |
| 100 | 1.19e-270 |
| 100 | 6.76e-298 |
| 100 | 1.67e-284 |
| 100 | 2.02e-283 |
| 100 | 0.0       |
| 100 | 0.0       |
| 100 | 5.77e-105 |
| 100 | 7.88e-103 |
| 100 | 6.04e-214 |
| 100 | 7.20e-132 |
| 100 | 3.56e-101 |
| 100 | 5.04e-97  |
| 100 | 4.25e-106 |
| 100 | 1.79e-108 |
| 100 | 1.25e-105 |
| 100 | 2.33e-129 |
| 100 | 1.54e-263 |
| 100 | 1.00e-197 |
| 100 | 3.27e-197 |
| 100 | 2.73e-180 |
| 100 | 4.62e-205 |
| 100 | 1.04e-193 |
| 100 | 1.38e-212 |
| 100 | 1.53e-231 |
| 100 | 4.97e-203 |
| 100 | 1.10e-210 |
| 100 | 3.98e-246 |

|     |           |
|-----|-----------|
| 100 | 2.15e-226 |
| 100 | 1.22e-208 |
| 100 | 1.36e-212 |
| 100 | 1.80e-204 |
| 100 | 4.30e-216 |
| 100 | 6.81e-212 |
| 100 | 4.03e-190 |
| 100 | 2.64e-232 |
| 100 | 2.21e-217 |
| 100 | 7.88e-180 |
| 100 | 3.90e-188 |
| 100 | 9.91e-214 |
| 100 | 1.02e-273 |
| 100 | 2.15e-285 |
| 100 | 2.19e-284 |
| 100 | 8.91e-204 |
| 100 | 4.41e-191 |
| 100 | 1.17e-202 |
| 100 | 2.89e-203 |
| 100 | 1.40e-200 |
| 100 | 3.20e-206 |
| 100 | 4.22e-194 |
| 100 | 2.77e-202 |
| 100 | 1.17e-195 |
| 100 | 3.07e-172 |
| 100 | 2.37e-197 |
| 100 | 3.87e-170 |
| 100 | 9.58e-191 |
| 100 | 1.86e-188 |
| 100 | 6.97e-189 |
| 100 | 1.81e-209 |
| 100 | 9.72e-213 |
| 100 | 5.64e-213 |
| 100 | 2.80e-213 |
| 100 | 7.69e-211 |
| 100 | 2.65e-107 |
| 100 | 1.19e-270 |
| 100 | 2.19e-282 |
| 100 | 4.78e-288 |
| 100 | 2.02e-283 |
| 100 | 0.0       |
| 100 | 5.77e-105 |
| 100 | 7.88e-103 |
| 100 | 6.04e-214 |
| 100 | 5.37e-126 |
| 100 | 7.20e-132 |



|     |           |
|-----|-----------|
| 100 | 1.25e-105 |
| 100 | 2.06e-100 |
| 100 | 5.04e-97  |
| 100 | 3.56e-101 |
| 100 | 4.25e-106 |
| 100 | 1.41e-99  |
| 100 | 2.33e-129 |
| 100 | 1.54e-263 |
| 100 | 1.04e-193 |
| 100 | 4.62e-205 |
| 100 | 3.27e-197 |
| 100 | 4.95e-193 |
| 100 | 1.00e-197 |
| 100 | 6.81e-212 |
| 100 | 1.22e-208 |
| 100 | 4.97e-203 |
| 100 | 7.71e-214 |
| 100 | 1.49e-213 |
| 100 | 8.34e-212 |
| 100 | 8.20e-202 |
| 100 | 8.68e-216 |
| 100 | 3.26e-212 |
| 100 | 1.12e-198 |
| 100 | 2.15e-226 |
| 100 | 1.61e-209 |
| 100 | 1.10e-212 |
| 100 | 8.90e-202 |
| 100 | 1.80e-204 |
| 100 | 3.76e-200 |
| 100 | 5.18e-204 |
| 100 | 8.12e-188 |
| 100 | 4.60e-206 |
| 100 | 3.01e-212 |
| 100 | 4.75e-195 |
| 100 | 1.31e-232 |
| 100 | 3.90e-188 |
| 100 | 7.88e-180 |
| 100 | 9.91e-214 |
| 100 | 1.06e-220 |
| 100 | 2.05e-214 |
| 100 | 2.15e-285 |
| 100 | 2.19e-284 |
| 100 | 8.91e-204 |
| 100 | 4.24e-193 |
| 100 | 3.83e-200 |
| 100 | 1.17e-202 |

|      |           |
|------|-----------|
| 100  | 9.12e-178 |
| 100  | 2.89e-203 |
| 100  | 1.08e-192 |
| 100  | 1.17e-195 |
| 100  | 3.20e-206 |
| 100  | 1.60e-196 |
| 100  | 1.03e-171 |
| 100  | 4.22e-194 |
| 100  | 2.77e-202 |
| 100  | 2.35e-191 |
| 100  | 9.58e-191 |
| 100  | 3.07e-172 |
| 100  | 2.37e-197 |
| 100  | 3.87e-170 |
| 100  | 1.31e-188 |
| 100  | 1.17e-208 |
| 100  | 4.12e-184 |
| 100  | 6.50e-192 |
| 100  | 1.43e-204 |
| 100  | 1.86e-188 |
| 100  | 9.72e-213 |
| 100  | 7.69e-211 |
| 100  | 3.28e-204 |
| 100  | 2.65e-107 |
| 100  | 3.36e-114 |
| 100  | 1.30e-74  |
| 100  | 2.19e-282 |
| 100  | 1.19e-270 |
| 100  | 9.40e-250 |
| 100  | 2.02e-283 |
| 100  | 1.06e-278 |
| 100  | 0.0       |
| 100  | 0.0       |
| 30.5 | 1.20e-31  |
| 31.3 | 6.82e-14  |
| 76.6 | 4.86e-160 |
| 81.3 | 5.08e-165 |
| 79.4 | 5.09e-169 |
| 66.6 | 1.42e-136 |
| 42.6 | 1.10e-67  |
| 73.9 | 1.92e-151 |
| 58.1 | 3.89e-97  |
| 39.8 | 1.98e-28  |
| 44.6 | 2.93e-74  |
| 50.8 | 4.36e-86  |
| 49.6 | 2.35e-70  |

|      |           |
|------|-----------|
| 81.0 | 3.01e-158 |
| 88.0 | 6.96e-161 |
| 79.8 | 1.01e-138 |
| 73.1 | 1.08e-196 |
| 82.8 | 1.08e-235 |
| 41.9 | 1.91e-66  |
| 34.9 | 1.52e-45  |
| 75.9 | 6.83e-145 |
| 45.2 | 2.18e-58  |
| 72.6 | 5.08e-130 |
| 82.7 | 1.88e-147 |
| 84.0 | 3.79e-145 |
| 46.7 | 4.05e-40  |
| 47.0 | 1.48e-30  |
| 47.2 | 3.57e-95  |
| 83.5 | 3.62e-143 |
| 78.5 | 3.58e-144 |
| 55.9 | 5.66e-99  |
| 47.9 | 1.44e-38  |
| 48.7 | 2.08e-90  |
| 48.7 | 2.95e-90  |
| 49.1 | 2.41e-83  |
| 73.2 | 2.24e-142 |
| 86.0 | 6.74e-162 |
| 51.4 | 9.05e-39  |
| 70.7 | 9.16e-128 |
| 51.4 | 3.87e-88  |
| 58.1 | 1.12e-100 |
| 58.1 | 3.89e-97  |
| 79.4 | 5.09e-169 |
| 52.9 | 2.60e-80  |
| 81.0 | 3.01e-158 |
| 83.0 | 6.08e-166 |
| 74.2 | 8.20e-153 |
| 76.6 | 4.86e-160 |
| 81.6 | 4.36e-166 |
| 58.5 | 2.76e-112 |
| 66.6 | 1.42e-136 |
| 54.0 | 4.45e-47  |
| 54.3 | 9.67e-107 |
| 54.5 | 4.19e-90  |
| 54.7 | 1.09e-83  |
| 68.0 | 9.99e-135 |
| 54.7 | 1.21e-85  |
| 53.5 | 8.21e-106 |
| 41.7 | 7.11e-61  |

|      |           |
|------|-----------|
| 66.8 | 1.12e-121 |
| 85.3 | 5.78e-157 |
| 81.1 | 6.25e-142 |
| 85.5 | 1.38e-153 |
| 72.8 | 7.35e-131 |
| 84.9 | 1.10e-214 |
| 84.1 | 1.68e-229 |
| 56.3 | 8.21e-98  |
| 73.1 | 1.08e-196 |
| 86.0 | 6.74e-162 |
| 71.5 | 4.83e-128 |
| 81.5 | 2.22e-173 |
| 57.6 | 4.03e-94  |
| 57.7 | 7.07e-103 |
| 57.9 | 3.69e-99  |
| 77.2 | 1.25e-148 |
| 71.7 | 1.46e-137 |
| 58.0 | 2.16e-103 |
| 83.5 | 1.97e-149 |
| 73.2 | 2.24e-142 |
| 78.2 | 3.68e-134 |
| 54.8 | 6.13e-96  |
| 58.1 | 1.53e-96  |
| 78.0 | 1.45e-149 |
| 36.1 | 2.36e-48  |
| 36.1 | 2.36e-48  |
| 81.0 | 3.01e-158 |
| 75.7 | 3.06e-143 |
| 79.4 | 5.09e-169 |
| 59.1 | 1.40e-107 |
| 60.0 | 6.77e-79  |
| 61.6 | 3.61e-57  |
| 76.6 | 4.86e-160 |
| 56.3 | 1.11e-102 |
| 63.6 | 1.68e-114 |
| 63.7 | 2.56e-56  |
| 63.9 | 3.58e-113 |
| 81.3 | 5.08e-165 |
| 64.2 | 2.26e-123 |
| 59.7 | 2.97e-122 |
| 64.7 | 1.97e-129 |
| 64.7 | 1.97e-129 |
| 64.8 | 3.34e-87  |
| 64.8 | 3.34e-87  |
| 65.6 | 9.32e-130 |
| 71.2 | 1.76e-142 |

|      |           |
|------|-----------|
| 66.5 | 3.49e-121 |
| 66.1 | 4.32e-145 |
| 42.6 | 1.55e-67  |
| 64.2 | 7.67e-123 |
| 68.0 | 2.01e-134 |
| 74.2 | 5.77e-153 |
| 79.9 | 4.20e-168 |
| 67.6 | 1.23e-67  |
| 68.0 | 1.22e-148 |
| 87.2 | 9.39e-177 |
| 68.6 | 1.16e-136 |
| 66.6 | 1.42e-136 |
| 81.9 | 1.86e-151 |
| 69.5 | 2.27e-109 |
| 69.7 | 9.08e-168 |
| 69.7 | 9.08e-168 |
| 69.7 | 1.52e-68  |
| 69.7 | 1.52e-68  |
| 66.6 | 3.15e-125 |
| 75.2 | 1.27e-155 |
| 73.9 | 2.54e-133 |
| 71.1 | 7.45e-133 |
| 71.1 | 4.07e-146 |
| 46.4 | 2.94e-84  |
| 73.2 | 2.16e-145 |
| 45.5 | 1.28e-59  |
| 71.9 | 1.46e-128 |
| 66.8 | 1.12e-121 |
| 72.4 | 3.22e-130 |
| 88.6 | 2.24e-185 |
| 76.3 | 5.13e-139 |
| 76.6 | 5.78e-152 |
| 80.4 | 1.07e-163 |
| 58.1 | 3.89e-97  |
| 52.7 | 6.60e-67  |
| 73.3 | 2.09e-138 |
| 64.0 | 1.33e-121 |
| 53.1 | 1.26e-102 |
| 74.4 | 7.04e-149 |
| 86.7 | 1.63e-147 |
| 74.8 | 6.80e-72  |
| 74.8 | 1.55e-133 |
| 75.0 | 1.54e-140 |
| 75.6 | 6.61e-94  |
| 75.7 | 6.67e-141 |
| 75.7 | 6.67e-141 |

|      |           |
|------|-----------|
| 63.5 | 8.18e-113 |
| 55.6 | 3.37e-87  |
| 55.3 | 1.57e-89  |
| 76.6 | 7.95e-137 |
| 76.6 | 2.57e-73  |
| 77.7 | 2.66e-145 |
| 68.8 | 1.32e-119 |
| 85.2 | 3.91e-158 |
| 69.0 | 5.43e-121 |
| 57.7 | 1.76e-83  |
| 85.1 | 9.33e-152 |
| 63.1 | 4.81e-112 |
| 59.7 | 1.85e-124 |
| 85.2 | 1.17e-174 |
| 88.3 | 5.25e-246 |
| 79.7 | 2.08e-116 |
| 73.1 | 1.08e-196 |
| 82.6 | 1.26e-234 |
| 80.3 | 4.61e-150 |
| 80.7 | 3.62e-103 |
| 54.7 | 1.24e-136 |
| 86.3 | 6.49e-156 |
| 64.1 | 3.30e-115 |
| 62.9 | 3.37e-113 |
| 65.3 | 1.52e-114 |
| 81.4 | 5.75e-213 |
| 71.9 | 3.17e-142 |
| 60.0 | 2.44e-105 |
| 81.7 | 1.08e-106 |
| 81.7 | 1.08e-106 |
| 58.3 | 2.65e-104 |
| 89.8 | 1.26e-165 |
| 71.4 | 7.88e-129 |
| 53.1 | 1.43e-91  |
| 70.3 | 4.39e-141 |
| 85.2 | 1.05e-170 |
| 66.9 | 4.85e-131 |
| 72.2 | 5.90e-129 |
| 57.9 | 3.69e-99  |
| 89.3 | 5.86e-167 |
| 59.1 | 2.77e-111 |
| 81.8 | 1.69e-158 |
| 83.1 | 3.25e-156 |
| 72.5 | 1.06e-140 |
| 84.8 | 6.87e-223 |
| 77.0 | 1.98e-150 |

|      |           |
|------|-----------|
| 78.1 | 1.11e-159 |
| 85.4 | 3.17e-87  |
| 72.2 | 4.73e-139 |
| 85.8 | 2.69e-150 |
| 52.3 | 5.08e-87  |
| 84.1 | 2.51e-157 |
| 87.2 | 1.80e-189 |
| 87.6 | 7.08e-119 |
| 87.6 | 7.08e-119 |
| 53.1 | 6.05e-90  |
| 87.8 | 2.07e-107 |
| 72.6 | 1.84e-139 |
| 88.4 | 2.84e-183 |
| 88.4 | 1.74e-84  |
| 88.5 | 9.66e-86  |
| 88.5 | 9.66e-86  |
| 88.9 | 7.02e-152 |
| 55.8 | 1.14e-92  |
| 89.5 | 7.87e-191 |
| 78.4 | 1.25e-150 |
| 89.4 | 6.45e-163 |
| 90.1 | 4.86e-166 |
| 90.6 | 5.10e-184 |
| 91.0 | 6.08e-188 |
| 91.0 | 6.08e-188 |
| 91.0 | 6.08e-188 |
| 91.2 | 2.47e-176 |
| 92.1 | 2.14e-178 |
| 92.2 | 2.30e-268 |
| 92.3 | 2.57e-182 |
| 92.5 | 1.02e-169 |
| 92.8 | 7.92e-176 |
| 93.0 | 1.94e-258 |
| 93.0 | 1.94e-258 |
| 93.2 | 1.64e-188 |
| 93.2 | 1.64e-188 |
| 93.2 | 1.64e-188 |
| 93.2 | 1.64e-188 |
| 93.4 | 4.52e-205 |
| 93.4 | 9.55e-190 |
| 93.4 | 4.52e-205 |
| 93.5 | 1.32e-190 |
| 93.7 | 2.98e-170 |
| 93.7 | 5.26e-173 |
| 93.9 | 2.93e-165 |
| 94.0 | 5.29e-192 |

|      |           |
|------|-----------|
| 94.1 | 1.56e-169 |
| 94.4 | 1.83e-180 |
| 94.7 | 4.53e-184 |
| 94.7 | 3.89e-194 |
| 94.8 | 1.71e-186 |
| 94.8 | 7.78e-182 |
| 95.0 | 3.17e-196 |
| 95.2 | 1.11e-173 |
| 95.2 | 1.11e-173 |
| 95.2 | 1.37e-209 |
| 95.2 | 1.11e-173 |
| 95.2 | 7.22e-83  |
| 95.3 | 8.17e-194 |
| 95.3 | 8.17e-194 |
| 95.4 | 1.79e-205 |
| 95.4 | 1.79e-205 |
| 95.4 | 1.79e-205 |
| 95.4 | 1.79e-205 |
| 95.4 | 2.90e-194 |
| 95.5 | 6.57e-191 |
| 95.6 | 1.99e-197 |
| 95.6 | 5.19e-265 |
| 95.6 | 2.15e-187 |
| 95.6 | 5.19e-265 |
| 95.6 | 3.31e-198 |
| 95.7 | 3.69e-177 |
| 95.7 | 2.97e-174 |
| 95.7 | 3.69e-177 |
| 95.9 | 0.0       |
| 95.9 | 2.83e-195 |
| 96.2 | 4.19e-197 |
| 96.2 | 5.78e-222 |
| 96.2 | 2.85e-275 |
| 96.2 | 1.64e-130 |
| 96.2 | 4.30e-191 |
| 96.2 | 1.64e-130 |
| 96.3 | 2.61e-181 |
| 96.4 | 9.59e-91  |
| 96.5 | 3.69e-197 |
| 96.6 | 4.67e-201 |
| 96.6 | 5.11e-198 |
| 96.6 | 1.13e-262 |
| 96.6 | 7.27e-199 |
| 96.6 | 7.27e-199 |
| 96.7 | 1.73e-207 |
| 96.8 | 2.38e-101 |



|      |           |
|------|-----------|
| 96.8 | 8.96e-213 |
| 96.8 | 1.70e-102 |
| 96.9 | 3.48e-200 |
| 97.0 | 1.17e-205 |
| 97.0 | 4.45e-179 |
| 97.0 | 2.86e-205 |
| 97.0 | 4.75e-192 |
| 97.2 | 6.50e-194 |
| 97.3 | 9.90e-96  |
| 97.3 | 7.34e-207 |
| 97.4 | 2.15e-187 |
| 97.4 | 7.01e-164 |
| 97.4 | 0.0       |
| 97.5 | 1.13e-138 |
| 97.5 | 3.47e-223 |
| 97.5 | 2.88e-191 |
| 97.6 | 6.80e-198 |
| 97.7 | 0.0       |
| 97.8 | 4.22e-186 |
| 97.8 | 1.32e-180 |
| 97.8 | 9.21e-195 |
| 97.8 | 1.72e-161 |
| 97.9 | 5.33e-101 |
| 97.9 | 1.53e-275 |
| 97.9 | 4.45e-277 |
| 97.9 | 3.35e-200 |
| 97.9 | 1.36e-187 |
| 97.9 | 1.89e-278 |
| 97.9 | 1.12e-196 |
| 97.9 | 1.89e-278 |
| 98.0 | 1.13e-177 |
| 98.0 | 3.16e-210 |
| 98.0 | 2.44e-169 |
| 98.0 | 3.85e-96  |
| 98.0 | 9.81e-102 |
| 98.0 | 5.12e-201 |
| 98.2 | 5.82e-280 |
| 98.2 | 8.84e-278 |
| 98.2 | 1.97e-195 |
| 98.2 | 0.0       |
| 98.2 | 1.80e-199 |
| 98.2 | 1.99e-258 |
| 98.2 | 0.0       |
| 98.3 | 3.89e-166 |
| 98.3 | 3.28e-203 |
| 98.3 | 3.87e-274 |

|      |           |
|------|-----------|
| 98.3 | 3.87e-274 |
| 98.4 | 5.27e-84  |
| 98.4 | 2.64e-184 |
| 98.4 | 4.56e-185 |
| 98.4 | 1.99e-172 |
| 98.4 | 6.54e-212 |
| 98.4 | 2.53e-229 |
| 98.4 | 9.02e-268 |
| 98.4 | 0.0       |
| 98.5 | 0.0       |
| 98.5 | 7.64e-201 |
| 98.5 | 2.02e-191 |
| 98.5 | 8.02e-191 |
| 98.6 | 1.86e-203 |
| 98.6 | 7.57e-189 |
| 98.6 | 2.01e-193 |
| 98.6 | 3.73e-103 |
| 98.6 | 2.08e-99  |
| 98.6 | 1.64e-197 |
| 98.6 | 1.64e-190 |
| 98.6 | 1.30e-204 |
| 98.7 | 2.21e-213 |
| 98.7 | 9.93e-102 |
| 98.7 | 2.21e-222 |
| 98.7 | 1.02e-271 |
| 98.7 | 2.48e-212 |
| 98.8 | 3.72e-178 |
| 98.8 | 5.23e-185 |
| 98.8 | 7.83e-180 |
| 98.8 | 1.29e-177 |
| 98.9 | 4.18e-133 |
| 98.9 | 4.18e-133 |
| 98.9 | 1.44e-196 |
| 98.9 | 0.0       |
| 98.9 | 4.18e-133 |
| 98.9 | 1.18e-190 |
| 98.9 | 3.34e-191 |
| 98.9 | 4.18e-133 |
| 99.0 | 1.32e-210 |
| 99.0 | 2.01e-204 |
| 99.0 | 1.26e-198 |
| 99.0 | 2.20e-211 |
| 99.0 | 3.25e-212 |
| 99.0 | 7.13e-209 |
| 99.0 | 1.26e-198 |
| 99.0 | 0.0       |

|      |           |
|------|-----------|
| 99.1 | 0.0       |
| 99.1 | 0.0       |
| 99.1 | 2.49e-220 |
| 99.1 | 3.72e-225 |
| 99.2 | 2.88e-279 |
| 99.2 | 9.60e-281 |
| 99.2 | 6.74e-181 |
| 99.2 | 4.37e-184 |
| 99.2 | 1.79e-181 |
| 99.2 | 7.47e-173 |
| 99.2 | 2.88e-279 |
| 99.2 | 8.82e-184 |
| 99.3 | 1.76e-89  |
| 99.3 | 7.67e-212 |
| 99.3 | 5.20e-212 |
| 99.3 | 4.47e-215 |
| 99.3 | 4.79e-202 |
| 99.3 | 9.20e-193 |
| 99.3 | 1.70e-99  |
| 99.3 | 8.67e-106 |
| 99.3 | 6.56e-211 |
| 99.3 | 7.88e-212 |
| 99.3 | 7.67e-212 |
| 99.3 | 3.23e-208 |
| 99.3 | 7.37e-209 |
| 99.3 | 4.82e-213 |
| 99.3 | 2.26e-193 |
| 99.3 | 4.87e-99  |
| 99.3 | 3.37e-101 |
| 99.3 | 3.23e-208 |
| 99.3 | 1.30e-182 |
| 99.3 | 6.05e-194 |
| 99.3 | 4.47e-215 |
| 99.3 | 0.0       |
| 99.3 | 5.38e-193 |
| 99.3 | 1.05e-213 |
| 99.3 | 4.87e-99  |
| 99.3 | 5.02e-213 |
| 99.3 | 3.23e-208 |
| 99.3 | 4.47e-215 |
| 99.3 | 2.48e-212 |
| 99.3 | 6.37e-185 |
| 99.3 | 1.42e-197 |
| 99.4 | 1.41e-128 |
| 99.4 | 3.95e-120 |
| 99.4 | 3.46e-102 |

|      |           |
|------|-----------|
| 99.4 | 9.95e-129 |
| 99.4 | 2.96e-103 |
| 99.4 | 2.29e-119 |
| 99.5 | 0.0       |
| 99.5 | 2.12e-80  |
| 99.5 | 1.14e-100 |
| 99.5 | 5.55e-278 |
| 99.5 | 1.23e-133 |
| 99.5 | 5.55e-278 |
| 99.5 | 4.54e-303 |
| 99.5 | 2.12e-80  |
| 99.5 | 0.0       |
| 99.6 | 1.18e-203 |
| 99.6 | 4.56e-178 |
| 99.6 | 3.32e-187 |
| 99.6 | 1.56e-187 |
| 99.6 | 3.76e-191 |
| 99.6 | 1.18e-203 |
| 99.6 | 4.69e-187 |
| 99.6 | 3.32e-187 |
| 99.6 | 5.69e-168 |
| 99.6 | 2.02e-195 |
| 99.6 | 1.18e-203 |
| 99.6 | 3.94e-199 |
| 99.6 | 3.81e-177 |
| 99.6 | 3.90e-183 |
| 99.6 | 3.23e-196 |
| 99.6 | 7.03e-192 |
| 99.6 | 2.46e-198 |
| 99.6 | 2.64e-188 |
| 99.6 | 1.01e-108 |
| 99.6 | 2.02e-195 |
| 99.6 | 1.18e-203 |
| 99.6 | 3.32e-192 |
| 99.6 | 1.79e-193 |
| 99.6 | 1.08e-201 |
| 99.6 | 6.26e-192 |
| 99.6 | 3.90e-183 |
| 99.6 | 1.80e-195 |
| 99.6 | 2.45e-193 |
| 99.7 | 8.84e-218 |
| 99.7 | 2.73e-227 |
| 99.7 | 3.58e-220 |
| 99.7 | 1.18e-213 |
| 99.7 | 7.58e-200 |
| 99.7 | 1.25e-230 |

|      |           |
|------|-----------|
| 99.7 | 1.29e-273 |
| 99.7 | 1.50e-286 |
| 99.7 | 1.04e-202 |
| 99.7 | 6.08e-213 |
| 99.7 | 2.21e-213 |
| 99.7 | 2.73e-227 |
| 99.7 | 5.34e-202 |
| 99.7 | 1.00e-202 |
| 99.7 | 1.17e-207 |
| 99.7 | 1.65e-217 |
| 99.7 | 5.43e-216 |
| 99.7 | 2.21e-215 |
| 99.7 | 8.34e-273 |
| 99.7 | 1.80e-283 |
| 99.7 | 1.04e-202 |
| 99.7 | 5.41e-211 |
| 99.7 | 1.76e-220 |
| 99.7 | 2.29e-211 |
| 99.7 | 2.68e-237 |
| 99.7 | 2.73e-227 |
| 99.7 | 2.05e-245 |
| 99.7 | 3.58e-220 |
| 99.7 | 9.23e-201 |
| 99.7 | 1.44e-214 |
| 99.7 | 1.18e-213 |
| 99.7 | 1.25e-230 |
| 99.7 | 1.28e-209 |
| 99.7 | 8.84e-218 |
| 99.7 | 4.94e-202 |
| 99.7 | 1.61e-210 |
| 99.7 | 5.34e-202 |
| 99.7 | 1.31e-232 |
| 99.7 | 1.50e-286 |
| 99.7 | 1.27e-203 |
| 99.7 | 1.76e-220 |
| 99.7 | 5.41e-211 |
| 99.7 | 0.0       |
| 99.7 | 6.33e-217 |
| 99.7 | 1.25e-230 |
| 99.7 | 2.73e-227 |
| 99.7 | 5.34e-202 |
| 99.7 | 4.94e-202 |
| 99.7 | 1.79e-220 |
| 99.7 | 2.57e-209 |
| 99.7 | 3.58e-220 |
| 99.7 | 5.43e-216 |

|      |           |
|------|-----------|
| 99.7 | 1.50e-286 |
| 99.7 | 5.41e-211 |
| 99.7 | 0.0       |
| 99.7 | 6.57e-234 |
| 99.7 | 1.89e-215 |
| 99.7 | 1.93e-199 |
| 99.7 | 2.73e-227 |
| 99.7 | 3.00e-208 |
| 99.7 | 8.98e-210 |
| 99.7 | 8.67e-217 |
| 99.7 | 1.68e-211 |
| 99.7 | 1.86e-280 |
| 99.7 | 1.50e-286 |
| 99.7 | 0.0       |
| 99.7 | 5.42e-212 |
| 99.7 | 1.89e-215 |
| 99.7 | 3.17e-223 |
| 99.7 | 4.83e-222 |
| 99.7 | 7.03e-236 |
| 99.7 | 1.82e-212 |
| 99.7 | 3.54e-223 |
| 99.7 | 6.33e-217 |
| 99.7 | 5.62e-212 |
| 99.7 | 1.86e-215 |
| 99.7 | 1.50e-286 |
| 99.7 | 4.15e-220 |
| 99.7 | 2.30e-212 |
| 99.7 | 0.0       |
| 99.8 | 1.32e-281 |
| 99.8 | 1.32e-281 |
| 99.8 | 0.0       |
| 99.8 | 1.32e-281 |
| 99.8 | 0.0       |
| 99.8 | 1.32e-281 |
| 99.8 | 0.0       |
| 99.8 | 1.32e-281 |
| 99.8 | 1.99e-273 |
| 99.8 | 0.0       |
| 99.8 | 9.61e-298 |
| 99.8 | 1.99e-273 |
| 99.8 | 1.32e-281 |
| 41.4 | 1.35e-50  |
| 86.0 | 6.74e-162 |
| 55.2 | 3.05e-96  |
| 75.2 | 1.27e-155 |
| 79.4 | 5.09e-169 |

|      |           |
|------|-----------|
| 44.0 | 5.11e-73  |
| 56.3 | 1.11e-102 |
| 68.0 | 1.42e-134 |
| 59.7 | 2.97e-122 |
| 62.2 | 5.16e-89  |
| 70.8 | 1.57e-139 |
| 76.6 | 4.86e-160 |
| 53.1 | 1.26e-102 |
| 75.7 | 3.06e-143 |
| 79.9 | 4.20e-168 |
| 81.0 | 3.01e-158 |
| 86.9 | 4.33e-184 |
| 37.5 | 2.67e-55  |
| 65.0 | 8.43e-137 |
| 65.4 | 1.76e-120 |
| 65.6 | 7.32e-113 |
| 65.7 | 1.02e-102 |
| 71.2 | 1.76e-142 |
| 71.8 | 6.23e-145 |
| 61.5 | 1.77e-125 |
| 66.8 | 1.12e-121 |
| 66.8 | 3.66e-86  |
| 43.5 | 3.70e-76  |
| 72.4 | 2.13e-141 |
| 68.0 | 3.48e-148 |
| 72.0 | 2.09e-134 |
| 58.1 | 3.89e-97  |
| 68.5 | 1.81e-140 |
| 86.1 | 2.12e-153 |
| 79.8 | 1.16e-143 |
| 69.7 | 9.08e-168 |
| 74.5 | 2.60e-134 |
| 70.5 | 2.28e-115 |
| 82.3 | 5.61e-145 |
| 71.0 | 5.05e-153 |
| 58.1 | 1.01e-95  |
| 85.2 | 3.91e-158 |
| 85.1 | 9.33e-152 |
| 56.7 | 1.00e-88  |
| 59.2 | 3.16e-97  |
| 63.0 | 3.34e-114 |
| 72.8 | 1.81e-131 |
| 60.1 | 3.22e-125 |
| 72.0 | 1.83e-143 |
| 71.5 | 7.74e-194 |
| 73.1 | 1.08e-196 |

|      |           |
|------|-----------|
| 88.3 | 5.25e-246 |
| 54.9 | 7.62e-138 |
| 40.1 | 8.89e-67  |
| 72.5 | 6.12e-130 |
| 60.0 | 2.11e-106 |
| 72.6 | 3.55e-144 |
| 81.8 | 1.69e-158 |
| 72.7 | 9.14e-124 |
| 83.7 | 1.93e-165 |
| 54.8 | 6.13e-96  |
| 72.2 | 4.16e-129 |
| 84.2 | 4.84e-160 |
| 77.0 | 3.55e-150 |
| 85.2 | 1.62e-170 |
| 51.4 | 1.25e-88  |
| 53.1 | 2.03e-91  |
| 71.4 | 9.81e-126 |
| 71.3 | 3.45e-129 |
| 36.1 | 2.36e-48  |
| 73.2 | 2.24e-142 |
| 83.1 | 6.56e-156 |
| 76.6 | 2.57e-73  |
| 46.6 | 8.09e-92  |
| 38.5 | 4.10e-53  |
| 63.2 | 1.50e-104 |
| 77.0 | 9.70e-138 |
| 61.5 | 5.66e-125 |
| 55.7 | 1.24e-101 |
| 66.8 | 1.92e-122 |
| 47.5 | 9.58e-78  |
| 79.9 | 2.83e-158 |
| 78.4 | 1.19e-81  |
| 89.6 | 4.12e-164 |
| 82.5 | 1.19e-227 |
| 64.5 | 1.97e-101 |
| 77.0 | 1.98e-150 |
| 82.4 | 3.25e-153 |
| 69.1 | 2.57e-129 |
| 83.3 | 2.82e-160 |
| 63.2 | 1.50e-104 |
| 66.7 | 2.35e-123 |
| 53.5 | 8.21e-106 |
| 39.0 | 7.60e-54  |
| 47.5 | 9.58e-78  |
| 76.6 | 4.86e-160 |
| 70.1 | 6.21e-142 |



|      |           |
|------|-----------|
| 82.9 | 7.05e-180 |
| 58.0 | 9.59e-116 |
| 83.7 | 1.05e-227 |
| 72.2 | 9.91e-142 |
| 83.9 | 1.01e-154 |
| 74.4 | 2.76e-143 |
| 56.5 | 7.37e-88  |
| 89.6 | 4.12e-164 |
| 80.8 | 1.03e-129 |
| 51.5 | 2.63e-101 |
| 70.7 | 1.98e-143 |
| 82.5 | 1.19e-227 |
| 87.6 | 3.08e-242 |
| 39.8 | 2.39e-100 |
| 47.3 | 2.43e-70  |
| 59.0 | 6.13e-97  |
| 64.1 | 3.22e-119 |
| 82.4 | 3.25e-153 |
| 86.9 | 9.74e-161 |
| 65.6 | 2.16e-121 |
| 77.0 | 1.98e-150 |
| 87.2 | 1.87e-212 |
| 87.4 | 6.29e-168 |
| 87.4 | 1.26e-221 |
| 87.6 | 7.08e-119 |
| 87.6 | 7.08e-119 |
| 88.0 | 9.49e-182 |
| 76.0 | 1.44e-148 |
| 43.0 | 9.24e-65  |
| 71.3 | 1.37e-124 |
| 89.0 | 1.67e-167 |
| 69.1 | 2.57e-129 |
| 83.3 | 2.82e-160 |
| 90.3 | 4.82e-176 |
| 91.0 | 6.08e-188 |
| 91.1 | 1.59e-154 |
| 91.5 | 4.79e-200 |
| 91.7 | 3.54e-177 |
| 92.5 | 1.06e-178 |
| 92.5 | 7.17e-170 |
| 93.2 | 1.64e-188 |
| 93.2 | 1.64e-188 |
| 93.7 | 2.03e-170 |
| 93.7 | 5.26e-173 |
| 93.8 | 8.41e-177 |
| 94.0 | 1.75e-170 |

|      |           |
|------|-----------|
| 94.2 | 6.61e-190 |
| 94.2 | 6.61e-190 |
| 94.3 | 1.75e-163 |
| 94.4 | 3.59e-186 |
| 94.6 | 2.63e-265 |
| 95.0 | 0.0       |
| 95.1 | 1.35e-170 |
| 95.2 | 1.11e-173 |
| 95.2 | 1.11e-173 |
| 95.3 | 1.96e-206 |
| 95.3 | 8.17e-194 |
| 95.3 | 8.17e-194 |
| 95.4 | 1.79e-205 |
| 95.4 | 1.79e-205 |
| 95.5 | 1.06e-151 |
| 95.6 | 5.19e-265 |
| 95.6 | 3.05e-187 |
| 95.6 | 5.19e-265 |
| 95.7 | 1.07e-176 |
| 95.7 | 3.69e-177 |
| 95.8 | 2.73e-168 |
| 96.0 | 4.46e-193 |
| 96.2 | 1.64e-130 |
| 96.4 | 2.69e-268 |
| 96.5 | 3.33e-200 |
| 96.6 | 5.11e-198 |
| 96.8 | 9.07e-198 |
| 97.1 | 1.71e-176 |
| 97.1 | 3.30e-186 |
| 97.1 | 1.26e-185 |
| 97.2 | 3.86e-272 |
| 97.3 | 3.45e-96  |
| 97.3 | 2.46e-206 |
| 97.3 | 2.46e-206 |
| 97.4 | 2.54e-190 |
| 97.4 | 1.84e-184 |
| 97.4 | 1.84e-184 |
| 97.5 | 7.58e-193 |
| 97.6 | 1.96e-178 |
| 97.6 | 2.67e-208 |
| 97.7 | 9.40e-183 |
| 97.7 | 1.86e-121 |
| 97.7 | 3.11e-193 |
| 97.7 | 1.95e-278 |
| 97.8 | 2.30e-194 |
| 98.1 | 6.24e-98  |

|      |           |
|------|-----------|
| 98.2 | 2.57e-241 |
| 98.3 | 4.80e-263 |
| 98.3 | 1.26e-201 |
| 98.4 | 1.31e-184 |
| 98.5 | 2.91e-188 |
| 98.5 | 5.14e-280 |
| 98.5 | 4.86e-282 |
| 98.5 | 4.65e-279 |
| 98.5 | 8.91e-197 |
| 98.6 | 1.75e-203 |
| 98.6 | 1.29e-248 |
| 98.7 | 2.60e-98  |
| 98.7 | 7.64e-283 |
| 98.8 | 5.28e-225 |
| 98.8 | 3.75e-181 |
| 98.9 | 4.18e-133 |
| 98.9 | 1.95e-201 |
| 98.9 | 4.18e-133 |
| 98.9 | 6.90e-265 |
| 98.9 | 0.0       |
| 99.0 | 5.67e-204 |
| 99.0 | 0.0       |
| 99.0 | 4.82e-213 |
| 99.0 | 3.51e-208 |
| 99.0 | 4.98e-219 |
| 99.1 | 8.32e-249 |
| 99.1 | 0.0       |
| 99.1 | 5.94e-151 |
| 99.2 | 7.37e-186 |
| 99.2 | 0.0       |
| 99.2 | 5.33e-171 |
| 99.2 | 2.58e-267 |
| 99.3 | 4.87e-99  |
| 99.3 | 3.21e-102 |
| 99.3 | 4.47e-215 |
| 99.3 | 7.67e-212 |
| 99.3 | 4.46e-188 |
| 99.3 | 2.49e-213 |
| 99.3 | 1.25e-202 |
| 99.3 | 1.70e-99  |
| 99.3 | 3.14e-213 |
| 99.3 | 2.14e-195 |
| 99.3 | 7.33e-201 |
| 99.4 | 0.0       |
| 99.5 | 7.37e-110 |
| 99.5 | 0.0       |

|      |           |
|------|-----------|
| 99.5 | 8.76e-293 |
| 99.6 | 1.18e-203 |
| 99.6 | 1.45e-194 |
| 99.6 | 3.32e-192 |
| 99.6 | 3.90e-183 |
| 99.6 | 3.32e-187 |
| 99.6 | 1.51e-202 |
| 99.6 | 1.53e-187 |
| 99.6 | 1.18e-203 |
| 99.6 | 1.45e-194 |
| 99.6 | 3.32e-187 |
| 99.6 | 1.12e-189 |

---
